# Supplementary material for: Ring finger protein 126 promotes breast cancer metastasis and serves as a potential target to improve the therapeutic sensitivity of ATR inhibitors
Source: Springer Nature journal article supplement (doi:10.1186/s13058-022-01586-0), 2022-12-20
Supplement: MOESM2 [file 23846588]

Supplementary table 1. The univariable cox proportional hazards regression analysis results in GSE11121

| gene    | coef   | se    | z      | p     | HR    | HRse  | HRz    | HRp   | HRCILL | HRCIUL |
|---------|--------|-------|--------|-------|-------|-------|--------|-------|--------|--------|
| ZZZ3    | -0.52  | 0.304 | -1.713 | 0.087 | 0.594 | 0.18  | -2.247 | 0.025 | 0.328  | 1.078  |
| ZZEF1   | -0.458 | 0.3   | -1.525 | 0.127 | 0.633 | 0.19  | -1.934 | 0.053 | 0.351  | 1.14   |
| ZYX     | -0.828 | 0.315 | -2.63  | 0.009 | 0.437 | 0.138 | -4.092 | 0     | 0.236  | 0.81   |
| ZXDC    | 0.881  | 0.315 | 2.799  | 0.005 | 2.415 | 0.76  | 1.86   | 0.063 | 1.303  | 4.476  |
| ZXDB    | 0.165  | 0.296 | 0.558  | 0.577 | 1.18  | 0.349 | 0.514  | 0.607 | 0.66   | 2.107  |
| ZWINT   | 0.637  | 0.306 | 2.081  | 0.037 | 1.89  | 0.578 | 1.54   | 0.124 | 1.038  | 3.442  |
| ZWILCH  | -0.004 | 0.297 | -0.014 | 0.988 | 0.996 | 0.295 | -0.014 | 0.988 | 0.557  | 1.781  |
| ZW10    | 0.267  | 0.3   | 0.887  | 0.375 | 1.306 | 0.392 | 0.779  | 0.436 | 0.724  | 2.353  |
| ZSWIM8  | 0.07   | 0.295 | 0.236  | 0.814 | 1.072 | 0.317 | 0.228  | 0.82  | 0.601  | 1.912  |
| ZSWIM1  | 0.082  | 0.296 | 0.276  | 0.783 | 1.085 | 0.321 | 0.265  | 0.791 | 0.607  | 1.938  |
| ZSCAN9  | 0.04   | 0.295 | 0.135  | 0.893 | 1.041 | 0.307 | 0.132  | 0.895 | 0.584  | 1.855  |
| ZSCAN5A | -0.164 | 0.296 | -0.552 | 0.581 | 0.849 | 0.252 | -0.599 | 0.549 | 0.475  | 1.518  |
| ZSCAN32 | -0.078 | 0.296 | -0.264 | 0.792 | 0.925 | 0.273 | -0.275 | 0.784 | 0.518  | 1.651  |
| ZSCAN31 | 0.088  | 0.296 | 0.297  | 0.766 | 1.092 | 0.323 | 0.284  | 0.776 | 0.612  | 1.949  |
| ZSCAN26 | 0.007  | 0.295 | 0.023  | 0.982 | 1.007 | 0.297 | 0.023  | 0.982 | 0.565  | 1.795  |
| ZSCAN2  | 0.491  | 0.3   | 1.637  | 0.102 | 1.633 | 0.49  | 1.294  | 0.196 | 0.908  | 2.939  |
| ZSCAN18 | -0.294 | 0.298 | -0.989 | 0.323 | 0.745 | 0.222 | -1.15  | 0.25  | 0.416  | 1.335  |
| ZSCAN16 | 0.631  | 0.303 | 2.08   | 0.038 | 1.879 | 0.569 | 1.543  | 0.123 | 1.037  | 3.403  |
| ZSCAN12 | -0.115 | 0.295 | -0.388 | 0.698 | 0.892 | 0.263 | -0.411 | 0.681 | 0.5    | 1.59   |
| ZRSR2   | 0.182  | 0.296 | 0.615  | 0.538 | 1.2   | 0.355 | 0.563  | 0.574 | 0.672  | 2.142  |
| ZPR1    | 0.41   | 0.3   | 1.37   | 0.171 | 1.507 | 0.452 | 1.123  | 0.261 | 0.838  | 2.712  |
| ZPBP    | -0.399 | 0.3   | -1.329 | 0.184 | 0.671 | 0.202 | -1.633 | 0.102 | 0.372  | 1.209  |
| ZP2     | 0.396  | 0.3   | 1.322  | 0.186 | 1.486 | 0.446 | 1.091  | 0.275 | 0.826  | 2.675  |
| ZNRF4   | 0.44   | 0.3   | 1.466  | 0.143 | 1.553 | 0.466 | 1.186  | 0.236 | 0.862  | 2.796  |
| ZNRD2   | 0.62   | 0.304 | 2.043  | 0.041 | 1.859 | 0.564 | 1.523  | 0.128 | 1.026  | 3.37   |
| ZNHIT6  | 0.031  | 0.296 | 0.104  | 0.917 | 1.031 | 0.305 | 0.103  | 0.918 | 0.578  | 1.842  |
| ZNHIT3  | -0.095 | 0.296 | -0.321 | 0.748 | 0.909 | 0.269 | -0.337 | 0.736 | 0.509  | 1.625  |
| ZNHIT2  | 0.13   | 0.296 | 0.438  | 0.661 | 1.138 | 0.337 | 0.411  | 0.681 | 0.637  | 2.033  |
| ZNHIT1  | 0.005  | 0.296 | 0.017  | 0.986 | 1.005 | 0.297 | 0.017  | 0.986 | 0.563  | 1.795  |
| ZNF93   | -0.11  | 0.295 | -0.372 | 0.71  | 0.896 | 0.265 | -0.393 | 0.695 | 0.502  | 1.599  |
| ZNF91   | 0.6    | 0.304 | 1.974  | 0.048 | 1.822 | 0.553 | 1.484  | 0.138 | 1.004  | 3.304  |
| ZNF862  | -1.053 | 0.328 | -3.213 | 0.001 | 0.349 | 0.114 | -5.696 | 0     | 0.183  | 0.663  |
| ZNF85   | 0.127  | 0.296 | 0.429  | 0.668 | 1.135 | 0.336 | 0.403  | 0.687 | 0.635  | 2.029  |
| ZNF84   | -0.208 | 0.298 | -0.7   | 0.484 | 0.812 | 0.242 | -0.778 | 0.437 | 0.453  | 1.455  |
| ZNF839  | -0.163 | 0.296 | -0.549 | 0.583 | 0.85  | 0.252 | -0.596 | 0.551 | 0.476  | 1.519  |
| ZNF835  | -0.424 | 0.302 | -1.403 | 0.161 | 0.654 | 0.198 | -1.748 | 0.081 | 0.362  | 1.183  |

|         |        |       |        |       |       |       |        |       |       |       |
|---------|--------|-------|--------|-------|-------|-------|--------|-------|-------|-------|
| ZNF83   | -0.297 | 0.297 | -1.001 | 0.317 | 0.743 | 0.221 | -1.166 | 0.244 | 0.415 | 1.33  |
| ZNF821  | 0.149  | 0.295 | 0.505  | 0.614 | 1.161 | 0.343 | 0.469  | 0.639 | 0.651 | 2.071 |
| ZNF814  | 0.397  | 0.3   | 1.325  | 0.185 | 1.488 | 0.446 | 1.094  | 0.274 | 0.827 | 2.676 |
| ZNF813  | -0.105 | 0.297 | -0.352 | 0.725 | 0.901 | 0.267 | -0.371 | 0.71  | 0.504 | 1.611 |
| ZNF81   | 0.028  | 0.295 | 0.094  | 0.925 | 1.028 | 0.304 | 0.093  | 0.926 | 0.576 | 1.834 |
| ZNF804A | 0.296  | 0.298 | 0.996  | 0.319 | 1.345 | 0.4   | 0.862  | 0.389 | 0.751 | 2.41  |
| ZNF80   | -0.055 | 0.296 | -0.187 | 0.852 | 0.946 | 0.28  | -0.192 | 0.848 | 0.53  | 1.689 |
| ZNF8    | 0.053  | 0.297 | 0.179  | 0.858 | 1.055 | 0.313 | 0.175  | 0.861 | 0.589 | 1.888 |
| ZNF79   | -0.461 | 0.303 | -1.524 | 0.127 | 0.631 | 0.191 | -1.937 | 0.053 | 0.349 | 1.141 |
| ZNF787  | -0.124 | 0.297 | -0.418 | 0.676 | 0.883 | 0.262 | -0.445 | 0.656 | 0.494 | 1.58  |
| ZNF780B | 0.333  | 0.298 | 1.119  | 0.263 | 1.395 | 0.415 | 0.952  | 0.341 | 0.779 | 2.5   |
| ZNF771  | 0.23   | 0.296 | 0.775  | 0.438 | 1.258 | 0.373 | 0.692  | 0.489 | 0.704 | 2.248 |
| ZNF770  | 0.052  | 0.296 | 0.175  | 0.861 | 1.053 | 0.312 | 0.171  | 0.865 | 0.589 | 1.883 |
| ZNF767P | -0.065 | 0.296 | -0.218 | 0.827 | 0.937 | 0.277 | -0.225 | 0.822 | 0.525 | 1.674 |
| ZNF764  | 0.6    | 0.303 | 1.984  | 0.047 | 1.822 | 0.551 | 1.492  | 0.136 | 1.007 | 3.297 |
| ZNF76   | 0.553  | 0.301 | 1.838  | 0.066 | 1.738 | 0.523 | 1.412  | 0.158 | 0.964 | 3.134 |
| ZNF75D  | -0.203 | 0.296 | -0.685 | 0.493 | 0.816 | 0.242 | -0.76  | 0.447 | 0.457 | 1.459 |
| ZNF750  | 0.413  | 0.3   | 1.376  | 0.169 | 1.511 | 0.453 | 1.127  | 0.26  | 0.839 | 2.721 |
| ZNF749  | -0.382 | 0.303 | -1.263 | 0.207 | 0.682 | 0.207 | -1.538 | 0.124 | 0.377 | 1.235 |
| ZNF747  | -0.308 | 0.298 | -1.034 | 0.301 | 0.735 | 0.219 | -1.211 | 0.226 | 0.41  | 1.317 |
| ZNF74   | 0.232  | 0.296 | 0.782  | 0.434 | 1.261 | 0.374 | 0.698  | 0.485 | 0.705 | 2.254 |
| ZNF721  | 0.497  | 0.312 | 1.593  | 0.111 | 1.644 | 0.513 | 1.255  | 0.21  | 0.892 | 3.031 |
| ZNF717  | 0.151  | 0.296 | 0.511  | 0.61  | 1.163 | 0.345 | 0.474  | 0.636 | 0.651 | 2.079 |
| ZNF711  | 0.705  | 0.31  | 2.274  | 0.023 | 2.023 | 0.627 | 1.632  | 0.103 | 1.102 | 3.713 |
| ZNF710  | 0.113  | 0.295 | 0.383  | 0.701 | 1.12  | 0.331 | 0.362  | 0.717 | 0.628 | 1.998 |
| ZNF706  | 0.278  | 0.298 | 0.933  | 0.351 | 1.32  | 0.393 | 0.815  | 0.415 | 0.737 | 2.366 |
| ZNF702P | 0.347  | 0.302 | 1.149  | 0.251 | 1.415 | 0.428 | 0.97   | 0.332 | 0.782 | 2.56  |
| ZNF701  | 0.202  | 0.297 | 0.68   | 0.496 | 1.224 | 0.363 | 0.616  | 0.538 | 0.684 | 2.189 |
| ZNF7    | 0.556  | 0.306 | 1.816  | 0.069 | 1.743 | 0.533 | 1.393  | 0.164 | 0.957 | 3.175 |
| ZNF696  | 0.47   | 0.3   | 1.568  | 0.117 | 1.6   | 0.479 | 1.251  | 0.211 | 0.889 | 2.878 |
| ZNF692  | -0.389 | 0.298 | -1.303 | 0.193 | 0.678 | 0.202 | -1.592 | 0.111 | 0.378 | 1.217 |
| ZNF688  | -0.153 | 0.296 | -0.517 | 0.605 | 0.858 | 0.254 | -0.559 | 0.576 | 0.48  | 1.533 |
| ZNF682  | 0.009  | 0.296 | 0.031  | 0.975 | 1.009 | 0.298 | 0.031  | 0.976 | 0.565 | 1.802 |
| ZNF675  | 0.139  | 0.296 | 0.47   | 0.638 | 1.149 | 0.34  | 0.439  | 0.661 | 0.644 | 2.051 |
| ZNF674  | 0.897  | 0.316 | 2.841  | 0.005 | 2.452 | 0.774 | 1.876  | 0.061 | 1.32  | 4.551 |
| ZNF672  | -0.197 | 0.297 | -0.662 | 0.508 | 0.821 | 0.244 | -0.732 | 0.464 | 0.459 | 1.47  |
| ZNF671  | -0.101 | 0.297 | -0.339 | 0.734 | 0.904 | 0.268 | -0.357 | 0.721 | 0.505 | 1.618 |
| ZNF669  | 0.166  | 0.298 | 0.557  | 0.578 | 1.181 | 0.352 | 0.513  | 0.608 | 0.658 | 2.119 |

|         |        |       |        |       |       |       |        |       |       |       |
|---------|--------|-------|--------|-------|-------|-------|--------|-------|-------|-------|
| ZNF668  | -0.221 | 0.299 | -0.741 | 0.459 | 0.802 | 0.239 | -0.829 | 0.407 | 0.446 | 1.439 |
| ZNF667  | 0.058  | 0.295 | 0.195  | 0.846 | 1.059 | 0.313 | 0.189  | 0.85  | 0.594 | 1.89  |
| ZNF665  | -0.36  | 0.299 | -1.202 | 0.229 | 0.698 | 0.209 | -1.447 | 0.148 | 0.388 | 1.255 |
| ZNF654  | -0.372 | 0.298 | -1.246 | 0.213 | 0.69  | 0.206 | -1.509 | 0.131 | 0.384 | 1.237 |
| ZNF652  | -0.245 | 0.297 | -0.826 | 0.409 | 0.783 | 0.232 | -0.936 | 0.349 | 0.437 | 1.4   |
| ZNF646  | 0.595  | 0.306 | 1.945  | 0.052 | 1.814 | 0.555 | 1.466  | 0.143 | 0.996 | 3.304 |
| ZNF639  | 0.009  | 0.296 | 0.029  | 0.977 | 1.009 | 0.299 | 0.029  | 0.977 | 0.565 | 1.802 |
| ZNF638  | 0.194  | 0.297 | 0.656  | 0.512 | 1.215 | 0.36  | 0.596  | 0.551 | 0.679 | 2.172 |
| ZNF629  | 0.169  | 0.296 | 0.572  | 0.568 | 1.185 | 0.351 | 0.526  | 0.599 | 0.663 | 2.117 |
| ZNF623  | 0.481  | 0.3   | 1.603  | 0.109 | 1.617 | 0.485 | 1.273  | 0.203 | 0.899 | 2.91  |
| ZNF614  | -0.273 | 0.297 | -0.918 | 0.358 | 0.761 | 0.226 | -1.056 | 0.291 | 0.425 | 1.363 |
| ZNF613  | -0.358 | 0.298 | -1.202 | 0.229 | 0.699 | 0.208 | -1.445 | 0.148 | 0.39  | 1.253 |
| ZNF611  | 0.396  | 0.303 | 1.307  | 0.191 | 1.486 | 0.45  | 1.079  | 0.28  | 0.821 | 2.69  |
| ZNF609  | 0.029  | 0.295 | 0.097  | 0.922 | 1.029 | 0.304 | 0.096  | 0.924 | 0.577 | 1.835 |
| ZNF606  | 0.21   | 0.296 | 0.708  | 0.479 | 1.233 | 0.365 | 0.639  | 0.523 | 0.69  | 2.204 |
| ZNF593  | 0.097  | 0.295 | 0.328  | 0.743 | 1.102 | 0.325 | 0.313  | 0.754 | 0.618 | 1.965 |
| ZNF592  | 0.204  | 0.296 | 0.69   | 0.49  | 1.227 | 0.363 | 0.624  | 0.533 | 0.686 | 2.192 |
| ZNF589  | -0.364 | 0.298 | -1.222 | 0.222 | 0.695 | 0.207 | -1.474 | 0.14  | 0.387 | 1.246 |
| ZNF587B | 0.008  | 0.296 | 0.027  | 0.978 | 1.008 | 0.298 | 0.027  | 0.978 | 0.564 | 1.801 |
| ZNF587  | 0.34   | 0.297 | 1.144  | 0.253 | 1.405 | 0.417 | 0.97   | 0.332 | 0.785 | 2.514 |
| ZNF586  | -0.126 | 0.296 | -0.427 | 0.669 | 0.881 | 0.261 | -0.455 | 0.649 | 0.493 | 1.574 |
| ZNF580  | -0.285 | 0.301 | -0.948 | 0.343 | 0.752 | 0.226 | -1.096 | 0.273 | 0.417 | 1.356 |
| ZNF576  | -0.011 | 0.296 | -0.038 | 0.97  | 0.989 | 0.293 | -0.038 | 0.969 | 0.554 | 1.766 |
| ZNF574  | 0.067  | 0.297 | 0.227  | 0.821 | 1.07  | 0.318 | 0.219  | 0.826 | 0.598 | 1.915 |
| ZNF573  | -0.039 | 0.295 | -0.132 | 0.895 | 0.962 | 0.284 | -0.134 | 0.893 | 0.539 | 1.715 |
| ZNF571  | -0.08  | 0.297 | -0.27  | 0.787 | 0.923 | 0.274 | -0.281 | 0.779 | 0.516 | 1.652 |
| ZNF562  | 0.658  | 0.306 | 2.151  | 0.031 | 1.93  | 0.59  | 1.576  | 0.115 | 1.06  | 3.514 |
| ZNF557  | -0.195 | 0.299 | -0.651 | 0.515 | 0.823 | 0.246 | -0.719 | 0.472 | 0.458 | 1.479 |
| ZNF556  | 0.233  | 0.298 | 0.784  | 0.433 | 1.263 | 0.376 | 0.699  | 0.485 | 0.705 | 2.263 |
| ZNF552  | -0.1   | 0.297 | -0.339 | 0.735 | 0.904 | 0.268 | -0.356 | 0.722 | 0.506 | 1.618 |
| ZNF551  | 0.183  | 0.296 | 0.619  | 0.536 | 1.201 | 0.356 | 0.566  | 0.572 | 0.672 | 2.146 |
| ZNF550  | -0.389 | 0.3   | -1.297 | 0.195 | 0.678 | 0.203 | -1.585 | 0.113 | 0.377 | 1.22  |
| ZNF549  | 0.406  | 0.3   | 1.354  | 0.176 | 1.501 | 0.45  | 1.113  | 0.266 | 0.834 | 2.701 |
| ZNF544  | 0.186  | 0.295 | 0.63   | 0.529 | 1.204 | 0.356 | 0.575  | 0.566 | 0.675 | 2.149 |
| ZNF536  | 0.013  | 0.296 | 0.043  | 0.966 | 1.013 | 0.3   | 0.043  | 0.966 | 0.567 | 1.81  |
| ZNF532  | 0.038  | 0.296 | 0.127  | 0.899 | 1.038 | 0.307 | 0.125  | 0.901 | 0.582 | 1.854 |
| ZNF529  | -0.292 | 0.298 | -0.982 | 0.326 | 0.746 | 0.222 | -1.14  | 0.254 | 0.416 | 1.338 |
| ZNF528  | 0.097  | 0.295 | 0.328  | 0.743 | 1.102 | 0.325 | 0.312  | 0.755 | 0.617 | 1.966 |

|         |        |       |        |       |       |       |        |       |       |       |
|---------|--------|-------|--------|-------|-------|-------|--------|-------|-------|-------|
| ZNF518A | 0.029  | 0.295 | 0.1    | 0.92  | 1.03  | 0.304 | 0.098  | 0.922 | 0.577 | 1.837 |
| ZNF516  | -0.819 | 0.315 | -2.601 | 0.009 | 0.441 | 0.139 | -4.029 | 0     | 0.238 | 0.817 |
| ZNF512B | -0.293 | 0.298 | -0.984 | 0.325 | 0.746 | 0.222 | -1.144 | 0.253 | 0.416 | 1.337 |
| ZNF510  | -0.268 | 0.298 | -0.898 | 0.369 | 0.765 | 0.228 | -1.03  | 0.303 | 0.427 | 1.372 |
| ZNF507  | 0.177  | 0.297 | 0.597  | 0.55  | 1.194 | 0.354 | 0.547  | 0.584 | 0.668 | 2.134 |
| ZNF506  | -0.008 | 0.295 | -0.028 | 0.978 | 0.992 | 0.293 | -0.028 | 0.978 | 0.556 | 1.769 |
| ZNF500  | 0.387  | 0.3   | 1.291  | 0.197 | 1.472 | 0.441 | 1.07   | 0.284 | 0.818 | 2.647 |
| ZNF493  | 0.335  | 0.298 | 1.125  | 0.261 | 1.398 | 0.416 | 0.956  | 0.339 | 0.78  | 2.506 |
| ZNF492  | 0.133  | 0.296 | 0.448  | 0.654 | 1.142 | 0.338 | 0.419  | 0.675 | 0.639 | 2.041 |
| ZNF484  | 0.079  | 0.295 | 0.267  | 0.79  | 1.082 | 0.32  | 0.257  | 0.798 | 0.606 | 1.93  |
| ZNF480  | -0.279 | 0.298 | -0.936 | 0.349 | 0.757 | 0.225 | -1.079 | 0.28  | 0.422 | 1.356 |
| ZNF473  | 0.143  | 0.296 | 0.485  | 0.628 | 1.154 | 0.341 | 0.452  | 0.651 | 0.647 | 2.06  |
| ZNF471  | -0.197 | 0.295 | -0.667 | 0.505 | 0.821 | 0.243 | -0.737 | 0.461 | 0.46  | 1.465 |
| ZNF468  | 0.658  | 0.307 | 2.145  | 0.032 | 1.93  | 0.592 | 1.572  | 0.116 | 1.058 | 3.521 |
| ZNF467  | 0.007  | 0.296 | 0.023  | 0.982 | 1.007 | 0.298 | 0.023  | 0.982 | 0.564 | 1.798 |
| ZNF460  | -0.101 | 0.295 | -0.343 | 0.732 | 0.904 | 0.267 | -0.361 | 0.718 | 0.506 | 1.612 |
| ZNF451  | -0.017 | 0.295 | -0.059 | 0.953 | 0.983 | 0.29  | -0.06  | 0.952 | 0.551 | 1.753 |
| ZNF45   | 0.017  | 0.295 | 0.056  | 0.955 | 1.017 | 0.3   | 0.056  | 0.956 | 0.57  | 1.814 |
| ZNF446  | -0.352 | 0.3   | -1.175 | 0.24  | 0.703 | 0.211 | -1.408 | 0.159 | 0.391 | 1.265 |
| ZNF444  | 0.232  | 0.297 | 0.78   | 0.436 | 1.261 | 0.375 | 0.696  | 0.487 | 0.704 | 2.259 |
| ZNF443  | -0.132 | 0.296 | -0.447 | 0.655 | 0.876 | 0.259 | -0.478 | 0.633 | 0.49  | 1.566 |
| ZNF442  | -0.352 | 0.3   | -1.173 | 0.241 | 0.704 | 0.211 | -1.405 | 0.16  | 0.391 | 1.266 |
| ZNF440  | 0.331  | 0.298 | 1.113  | 0.266 | 1.393 | 0.415 | 0.948  | 0.343 | 0.777 | 2.496 |
| ZNF432  | -0.034 | 0.295 | -0.115 | 0.908 | 0.966 | 0.285 | -0.117 | 0.906 | 0.542 | 1.724 |
| ZNF430  | -0.396 | 0.298 | -1.329 | 0.184 | 0.673 | 0.2   | -1.63  | 0.103 | 0.376 | 1.207 |
| ZNF43   | 0.047  | 0.295 | 0.16   | 0.873 | 1.048 | 0.31  | 0.156  | 0.876 | 0.588 | 1.87  |
| ZNF428  | 0.348  | 0.298 | 1.167  | 0.243 | 1.416 | 0.423 | 0.985  | 0.324 | 0.789 | 2.542 |
| ZNF426  | -0.211 | 0.296 | -0.712 | 0.476 | 0.81  | 0.24  | -0.793 | 0.428 | 0.453 | 1.447 |
| ZNF423  | -0.678 | 0.306 | -2.216 | 0.027 | 0.508 | 0.155 | -3.17  | 0.002 | 0.279 | 0.925 |
| ZNF419  | -0.262 | 0.298 | -0.88  | 0.379 | 0.77  | 0.229 | -1.006 | 0.314 | 0.429 | 1.379 |
| ZNF415  | -0.153 | 0.297 | -0.515 | 0.607 | 0.858 | 0.255 | -0.556 | 0.578 | 0.48  | 1.535 |
| ZNF41   | 0.27   | 0.297 | 0.912  | 0.362 | 1.31  | 0.389 | 0.799  | 0.424 | 0.733 | 2.343 |
| ZNF408  | 0.227  | 0.297 | 0.767  | 0.443 | 1.255 | 0.373 | 0.686  | 0.493 | 0.702 | 2.246 |
| ZNF407  | -0.446 | 0.302 | -1.475 | 0.14  | 0.64  | 0.194 | -1.859 | 0.063 | 0.354 | 1.158 |
| ZNF395  | -0.311 | 0.298 | -1.043 | 0.297 | 0.733 | 0.218 | -1.224 | 0.221 | 0.409 | 1.314 |
| ZNF394  | -0.343 | 0.304 | -1.126 | 0.26  | 0.71  | 0.216 | -1.343 | 0.179 | 0.391 | 1.289 |
| ZNF391  | -0.195 | 0.297 | -0.658 | 0.51  | 0.823 | 0.244 | -0.727 | 0.467 | 0.46  | 1.472 |
| ZNF385D | 0.569  | 0.306 | 1.864  | 0.062 | 1.767 | 0.54  | 1.421  | 0.155 | 0.971 | 3.216 |

|         |        |       |        |       |       |       |        |       |       |       |
|---------|--------|-------|--------|-------|-------|-------|--------|-------|-------|-------|
| ZNF384  | -0.33  | 0.298 | -1.108 | 0.268 | 0.719 | 0.214 | -1.313 | 0.189 | 0.401 | 1.289 |
| ZNF37BP | 0.093  | 0.296 | 0.316  | 0.752 | 1.098 | 0.325 | 0.302  | 0.763 | 0.615 | 1.96  |
| ZNF37A  | 0.298  | 0.298 | 1.002  | 0.317 | 1.348 | 0.401 | 0.866  | 0.387 | 0.752 | 2.416 |
| ZNF365  | -0.114 | 0.296 | -0.386 | 0.7   | 0.892 | 0.264 | -0.409 | 0.683 | 0.5   | 1.592 |
| ZNF362  | -0.085 | 0.295 | -0.289 | 0.773 | 0.918 | 0.271 | -0.301 | 0.763 | 0.515 | 1.638 |
| ZNF358  | 0.017  | 0.297 | 0.057  | 0.954 | 1.017 | 0.302 | 0.057  | 0.955 | 0.568 | 1.822 |
| ZNF354A | -0.058 | 0.296 | -0.196 | 0.845 | 0.944 | 0.279 | -0.201 | 0.84  | 0.529 | 1.685 |
| ZNF350  | 0.515  | 0.303 | 1.7    | 0.089 | 1.674 | 0.507 | 1.329  | 0.184 | 0.924 | 3.031 |
| ZNF35   | 0.654  | 0.305 | 2.146  | 0.032 | 1.924 | 0.587 | 1.575  | 0.115 | 1.058 | 3.498 |
| ZNF345  | -0.244 | 0.298 | -0.821 | 0.412 | 0.783 | 0.233 | -0.93  | 0.353 | 0.437 | 1.404 |
| ZNF343  | 0.129  | 0.295 | 0.435  | 0.663 | 1.137 | 0.336 | 0.409  | 0.683 | 0.637 | 2.029 |
| ZNF34   | 0.457  | 0.3   | 1.523  | 0.128 | 1.579 | 0.473 | 1.223  | 0.221 | 0.877 | 2.842 |
| ZNF33B  | 0.079  | 0.295 | 0.267  | 0.789 | 1.082 | 0.319 | 0.257  | 0.797 | 0.607 | 1.93  |
| ZNF337  | 0.092  | 0.299 | 0.308  | 0.758 | 1.096 | 0.328 | 0.294  | 0.769 | 0.611 | 1.969 |
| ZNF335  | -0.136 | 0.297 | -0.456 | 0.648 | 0.873 | 0.259 | -0.489 | 0.625 | 0.488 | 1.563 |
| ZNF334  | -0.048 | 0.296 | -0.163 | 0.87  | 0.953 | 0.282 | -0.167 | 0.867 | 0.534 | 1.701 |
| ZNF331  | -0.398 | 0.3   | -1.328 | 0.184 | 0.671 | 0.201 | -1.632 | 0.103 | 0.373 | 1.209 |
| ZNF330  | -0.09  | 0.297 | -0.304 | 0.761 | 0.914 | 0.271 | -0.318 | 0.75  | 0.511 | 1.634 |
| ZNF329  | 0.157  | 0.297 | 0.528  | 0.597 | 1.17  | 0.347 | 0.489  | 0.625 | 0.654 | 2.092 |
| ZNF324B | 0.527  | 0.3   | 1.755  | 0.079 | 1.694 | 0.509 | 1.364  | 0.173 | 0.94  | 3.052 |
| ZNF324  | -0.147 | 0.297 | -0.496 | 0.62  | 0.863 | 0.256 | -0.534 | 0.593 | 0.483 | 1.544 |
| ZNF322  | -0.198 | 0.298 | -0.666 | 0.505 | 0.82  | 0.244 | -0.737 | 0.461 | 0.458 | 1.47  |
| ZNF32   | 0.14   | 0.295 | 0.473  | 0.636 | 1.15  | 0.34  | 0.442  | 0.659 | 0.645 | 2.051 |
| ZNF318  | 0.239  | 0.298 | 0.802  | 0.423 | 1.27  | 0.378 | 0.713  | 0.476 | 0.708 | 2.278 |
| ZNF304  | -0.351 | 0.3   | -1.172 | 0.241 | 0.704 | 0.211 | -1.405 | 0.16  | 0.391 | 1.266 |
| ZNF302  | -0.131 | 0.297 | -0.441 | 0.66  | 0.877 | 0.26  | -0.471 | 0.638 | 0.491 | 1.57  |
| ZNF3    | -0.005 | 0.296 | -0.018 | 0.985 | 0.995 | 0.294 | -0.018 | 0.985 | 0.557 | 1.776 |
| ZNF292  | 0.287  | 0.296 | 0.97   | 0.332 | 1.333 | 0.395 | 0.843  | 0.399 | 0.746 | 2.382 |
| ZNF287  | 0.413  | 0.3   | 1.375  | 0.169 | 1.511 | 0.454 | 1.126  | 0.26  | 0.839 | 2.721 |
| ZNF286A | -0.531 | 0.303 | -1.754 | 0.079 | 0.588 | 0.178 | -2.314 | 0.021 | 0.325 | 1.064 |
| ZNF282  | -0.309 | 0.3   | -1.03  | 0.303 | 0.734 | 0.22  | -1.207 | 0.228 | 0.408 | 1.321 |
| ZNF281  | -0.028 | 0.296 | -0.095 | 0.924 | 0.972 | 0.287 | -0.097 | 0.923 | 0.545 | 1.735 |
| ZNF280B | 0.537  | 0.306 | 1.757  | 0.079 | 1.711 | 0.523 | 1.359  | 0.174 | 0.94  | 3.116 |
| ZNF280A | -0.242 | 0.297 | -0.813 | 0.416 | 0.785 | 0.233 | -0.92  | 0.358 | 0.439 | 1.406 |
| ZNF277  | -0.656 | 0.307 | -2.139 | 0.032 | 0.519 | 0.159 | -3.023 | 0.003 | 0.285 | 0.947 |
| ZNF276  | -0.057 | 0.295 | -0.192 | 0.848 | 0.945 | 0.279 | -0.198 | 0.843 | 0.53  | 1.685 |
| ZNF274  | 0.089  | 0.297 | 0.3    | 0.764 | 1.093 | 0.324 | 0.287  | 0.774 | 0.611 | 1.954 |
| ZNF273  | -0.504 | 0.302 | -1.666 | 0.096 | 0.604 | 0.183 | -2.166 | 0.03  | 0.334 | 1.093 |

|            |        |       |        |       |       |       |        |       |       |       |
|------------|--------|-------|--------|-------|-------|-------|--------|-------|-------|-------|
| ZNF271P    | -0.144 | 0.296 | -0.485 | 0.628 | 0.866 | 0.257 | -0.521 | 0.602 | 0.485 | 1.548 |
| ZNF268     | 0.522  | 0.302 | 1.728  | 0.084 | 1.685 | 0.509 | 1.346  | 0.178 | 0.932 | 3.046 |
| ZNF267     | -0.131 | 0.295 | -0.443 | 0.658 | 0.877 | 0.259 | -0.473 | 0.636 | 0.492 | 1.565 |
| ZNF266     | -0.565 | 0.302 | -1.867 | 0.062 | 0.569 | 0.172 | -2.509 | 0.012 | 0.314 | 1.029 |
| ZNF264     | 0.046  | 0.295 | 0.155  | 0.877 | 1.047 | 0.309 | 0.151  | 0.88  | 0.587 | 1.867 |
| ZNF26      | -0.158 | 0.296 | -0.534 | 0.593 | 0.854 | 0.252 | -0.578 | 0.563 | 0.478 | 1.524 |
| ZNF259P1   | -0.236 | 0.299 | -0.791 | 0.429 | 0.789 | 0.236 | -0.892 | 0.372 | 0.44  | 1.418 |
| ZNF257     | 0.326  | 0.297 | 1.097  | 0.273 | 1.385 | 0.411 | 0.936  | 0.349 | 0.774 | 2.479 |
| ZNF254     | -0.032 | 0.298 | -0.108 | 0.914 | 0.968 | 0.288 | -0.11  | 0.912 | 0.54  | 1.735 |
| ZNF253     | -0.572 | 0.306 | -1.872 | 0.061 | 0.564 | 0.172 | -2.527 | 0.012 | 0.31  | 1.027 |
| ZNF250     | 1.039  | 0.321 | 3.233  | 0.001 | 2.827 | 0.908 | 2.011  | 0.044 | 1.506 | 5.307 |
| ZNF248     | 0.001  | 0.295 | 0.003  | 0.998 | 1.001 | 0.295 | 0.003  | 0.998 | 0.561 | 1.785 |
| ZNF24      | -0.731 | 0.311 | -2.354 | 0.019 | 0.481 | 0.15  | -3.468 | 0.001 | 0.262 | 0.885 |
| ZNF239     | 0.303  | 0.298 | 1.019  | 0.308 | 1.354 | 0.403 | 0.879  | 0.379 | 0.756 | 2.427 |
| ZNF236     | -0.048 | 0.296 | -0.161 | 0.872 | 0.953 | 0.282 | -0.165 | 0.869 | 0.534 | 1.702 |
| ZNF235     | -0.056 | 0.296 | -0.188 | 0.851 | 0.946 | 0.28  | -0.193 | 0.847 | 0.529 | 1.691 |
| ZNF234     | -0.119 | 0.296 | -0.401 | 0.688 | 0.888 | 0.263 | -0.426 | 0.67  | 0.497 | 1.587 |
| ZNF232     | 0.474  | 0.3   | 1.583  | 0.113 | 1.607 | 0.482 | 1.261  | 0.207 | 0.893 | 2.892 |
| ZNF230     | -0.197 | 0.298 | -0.659 | 0.51  | 0.821 | 0.245 | -0.728 | 0.467 | 0.458 | 1.475 |
| ZNF23      | 0.03   | 0.295 | 0.102  | 0.919 | 1.03  | 0.304 | 0.1    | 0.92  | 0.578 | 1.837 |
| ZNF227     | -0.559 | 0.31  | -1.802 | 0.072 | 0.572 | 0.177 | -2.415 | 0.016 | 0.311 | 1.05  |
| ZNF226     | -0.296 | 0.304 | -0.975 | 0.329 | 0.744 | 0.226 | -1.135 | 0.256 | 0.41  | 1.349 |
| ZNF225     | -0.241 | 0.298 | -0.808 | 0.419 | 0.786 | 0.234 | -0.914 | 0.361 | 0.438 | 1.41  |
| ZNF224     | -0.013 | 0.296 | -0.043 | 0.966 | 0.987 | 0.292 | -0.043 | 0.966 | 0.553 | 1.763 |
| ZNF223     | -0.199 | 0.298 | -0.669 | 0.504 | 0.819 | 0.244 | -0.74  | 0.459 | 0.457 | 1.469 |
| ZNF222     | -0.079 | 0.298 | -0.267 | 0.79  | 0.924 | 0.275 | -0.277 | 0.781 | 0.515 | 1.655 |
| ZNF221     | -0.222 | 0.301 | -0.737 | 0.461 | 0.801 | 0.241 | -0.825 | 0.409 | 0.444 | 1.445 |
| ZNF22      | 0.476  | 0.3   | 1.586  | 0.113 | 1.609 | 0.482 | 1.262  | 0.207 | 0.894 | 2.896 |
| ZNF219     | 0.287  | 0.298 | 0.965  | 0.335 | 1.332 | 0.396 | 0.839  | 0.402 | 0.744 | 2.387 |
| ZNF217     | 0.109  | 0.295 | 0.369  | 0.712 | 1.115 | 0.329 | 0.35   | 0.727 | 0.625 | 1.989 |
| ZNF215     | -0.469 | 0.303 | -1.549 | 0.121 | 0.626 | 0.189 | -1.976 | 0.048 | 0.346 | 1.132 |
| ZNF214     | 0.093  | 0.297 | 0.312  | 0.755 | 1.097 | 0.326 | 0.298  | 0.766 | 0.613 | 1.965 |
| ZNF213-AS1 | -0.324 | 0.304 | -1.064 | 0.287 | 0.723 | 0.22  | -1.257 | 0.209 | 0.398 | 1.314 |
| ZNF212     | 0.739  | 0.306 | 2.417  | 0.016 | 2.094 | 0.64  | 1.708  | 0.088 | 1.15  | 3.813 |
| ZNF211     | -0.434 | 0.303 | -1.434 | 0.152 | 0.648 | 0.196 | -1.795 | 0.073 | 0.358 | 1.173 |
| ZNF207     | -0.012 | 0.295 | -0.041 | 0.967 | 0.988 | 0.292 | -0.042 | 0.967 | 0.554 | 1.762 |
| ZNF205-AS1 | 0.158  | 0.295 | 0.535  | 0.593 | 1.171 | 0.346 | 0.495  | 0.621 | 0.657 | 2.089 |
| ZNF205     | -0.08  | 0.298 | -0.269 | 0.788 | 0.923 | 0.275 | -0.28  | 0.779 | 0.514 | 1.656 |

|         |        |       |        |       |       |       |        |       |       |       |
|---------|--------|-------|--------|-------|-------|-------|--------|-------|-------|-------|
| ZNF204P | 0.411  | 0.298 | 1.379  | 0.168 | 1.509 | 0.45  | 1.131  | 0.258 | 0.841 | 2.707 |
| ZNF202  | -0.458 | 0.301 | -1.523 | 0.128 | 0.632 | 0.19  | -1.931 | 0.053 | 0.35  | 1.141 |
| ZNF200  | -0.049 | 0.296 | -0.167 | 0.868 | 0.952 | 0.282 | -0.171 | 0.864 | 0.533 | 1.7   |
| ZNF197  | 0.849  | 0.315 | 2.697  | 0.007 | 2.338 | 0.736 | 1.817  | 0.069 | 1.261 | 4.334 |
| ZNF195  | -0.395 | 0.3   | -1.319 | 0.187 | 0.674 | 0.202 | -1.618 | 0.106 | 0.374 | 1.212 |
| ZNF189  | -0.403 | 0.3   | -1.346 | 0.178 | 0.668 | 0.2   | -1.657 | 0.097 | 0.371 | 1.202 |
| ZNF185  | 0.319  | 0.3   | 1.065  | 0.287 | 1.376 | 0.412 | 0.912  | 0.362 | 0.765 | 2.474 |
| ZNF184  | 0.01   | 0.295 | 0.034  | 0.973 | 1.01  | 0.298 | 0.034  | 0.973 | 0.567 | 1.801 |
| ZNF180  | -0.072 | 0.296 | -0.242 | 0.809 | 0.931 | 0.275 | -0.251 | 0.802 | 0.521 | 1.662 |
| ZNF175  | -0.309 | 0.298 | -1.037 | 0.3   | 0.734 | 0.219 | -1.215 | 0.224 | 0.41  | 1.316 |
| ZNF174  | -0.212 | 0.297 | -0.714 | 0.475 | 0.809 | 0.24  | -0.796 | 0.426 | 0.452 | 1.447 |
| ZNF165  | 0.589  | 0.303 | 1.947  | 0.052 | 1.802 | 0.545 | 1.471  | 0.141 | 0.996 | 3.261 |
| ZNF160  | 0.116  | 0.296 | 0.391  | 0.696 | 1.123 | 0.333 | 0.369  | 0.712 | 0.628 | 2.008 |
| ZNF16   | 0.419  | 0.3   | 1.398  | 0.162 | 1.52  | 0.455 | 1.142  | 0.253 | 0.845 | 2.735 |
| ZNF157  | -0.148 | 0.297 | -0.5   | 0.617 | 0.862 | 0.256 | -0.538 | 0.59  | 0.482 | 1.542 |
| ZNF155  | -0.49  | 0.3   | -1.633 | 0.103 | 0.613 | 0.184 | -2.106 | 0.035 | 0.34  | 1.103 |
| ZNF154  | -0.123 | 0.296 | -0.417 | 0.677 | 0.884 | 0.262 | -0.444 | 0.657 | 0.495 | 1.579 |
| ZNF148  | 1.002  | 0.322 | 3.111  | 0.002 | 2.724 | 0.877 | 1.965  | 0.049 | 1.449 | 5.12  |
| ZNF146  | -0.204 | 0.298 | -0.685 | 0.493 | 0.815 | 0.243 | -0.76  | 0.447 | 0.455 | 1.462 |
| ZNF143  | -0.339 | 0.298 | -1.138 | 0.255 | 0.713 | 0.212 | -1.354 | 0.176 | 0.397 | 1.277 |
| ZNF142  | 0.317  | 0.3   | 1.058  | 0.29  | 1.373 | 0.411 | 0.907  | 0.365 | 0.763 | 2.47  |
| ZNF141  | 0.165  | 0.295 | 0.56   | 0.575 | 1.18  | 0.348 | 0.516  | 0.606 | 0.661 | 2.105 |
| ZNF140  | -0.354 | 0.303 | -1.168 | 0.243 | 0.702 | 0.213 | -1.402 | 0.161 | 0.388 | 1.271 |
| ZNF14   | 0.691  | 0.306 | 2.257  | 0.024 | 1.995 | 0.611 | 1.63   | 0.103 | 1.095 | 3.635 |
| ZNF137P | 0.335  | 0.298 | 1.126  | 0.26  | 1.399 | 0.417 | 0.956  | 0.339 | 0.78  | 2.508 |
| ZNF136  | -0.37  | 0.3   | -1.234 | 0.217 | 0.691 | 0.207 | -1.493 | 0.135 | 0.384 | 1.243 |
| ZNF135  | -0.034 | 0.295 | -0.114 | 0.909 | 0.967 | 0.285 | -0.116 | 0.908 | 0.542 | 1.724 |
| ZNF134  | -0.212 | 0.299 | -0.709 | 0.478 | 0.809 | 0.242 | -0.79  | 0.43  | 0.451 | 1.453 |
| ZNF133  | 0.401  | 0.3   | 1.337  | 0.181 | 1.493 | 0.448 | 1.102  | 0.271 | 0.83  | 2.688 |
| ZNF132  | -0.661 | 0.31  | -2.132 | 0.033 | 0.516 | 0.16  | -3.022 | 0.003 | 0.281 | 0.948 |
| ZNF124  | 0.277  | 0.296 | 0.937  | 0.349 | 1.32  | 0.391 | 0.818  | 0.413 | 0.739 | 2.359 |
| ZNF12   | -0.234 | 0.296 | -0.79  | 0.429 | 0.791 | 0.234 | -0.89  | 0.373 | 0.443 | 1.414 |
| ZNF117  | 0.548  | 0.306 | 1.794  | 0.073 | 1.73  | 0.529 | 1.381  | 0.167 | 0.951 | 3.15  |
| ZNF112  | 0.033  | 0.296 | 0.113  | 0.91  | 1.034 | 0.306 | 0.111  | 0.912 | 0.579 | 1.847 |
| ZNF107  | -0.043 | 0.295 | -0.145 | 0.885 | 0.958 | 0.283 | -0.148 | 0.882 | 0.537 | 1.71  |
| ZNF106  | -0.488 | 0.3   | -1.626 | 0.104 | 0.614 | 0.184 | -2.097 | 0.036 | 0.341 | 1.105 |
| ZNF10   | -0.51  | 0.301 | -1.697 | 0.09  | 0.6   | 0.18  | -2.214 | 0.027 | 0.333 | 1.082 |
| ZMYND8  | -0.028 | 0.295 | -0.095 | 0.924 | 0.972 | 0.287 | -0.097 | 0.923 | 0.545 | 1.733 |

|          |        |       |        |       |       |       |        |       |       |       |
|----------|--------|-------|--------|-------|-------|-------|--------|-------|-------|-------|
| ZMYND11  | -0.032 | 0.296 | -0.106 | 0.915 | 0.969 | 0.287 | -0.108 | 0.914 | 0.542 | 1.732 |
| ZMYND10  | -0.481 | 0.306 | -1.572 | 0.116 | 0.618 | 0.189 | -2.019 | 0.043 | 0.339 | 1.126 |
| ZMYM6    | -0.399 | 0.3   | -1.33  | 0.183 | 0.671 | 0.201 | -1.634 | 0.102 | 0.373 | 1.208 |
| ZMYM5    | 0.523  | 0.303 | 1.723  | 0.085 | 1.686 | 0.512 | 1.342  | 0.18  | 0.931 | 3.056 |
| ZMYM4    | -0.112 | 0.296 | -0.377 | 0.706 | 0.894 | 0.265 | -0.399 | 0.69  | 0.5   | 1.599 |
| ZMYM3    | 0.604  | 0.303 | 1.996  | 0.046 | 1.83  | 0.554 | 1.498  | 0.134 | 1.011 | 3.314 |
| ZMYM2    | 1.09   | 0.328 | 3.321  | 0.001 | 2.973 | 0.976 | 2.023  | 0.043 | 1.563 | 5.657 |
| ZMYM1    | 0.02   | 0.295 | 0.069  | 0.945 | 1.021 | 0.301 | 0.069  | 0.945 | 0.572 | 1.821 |
| ZMPSTE24 | 0.143  | 0.297 | 0.482  | 0.63  | 1.154 | 0.343 | 0.449  | 0.653 | 0.644 | 2.066 |
| ZMIZ2    | 0.248  | 0.296 | 0.837  | 0.403 | 1.281 | 0.379 | 0.741  | 0.459 | 0.717 | 2.289 |
| ZMIZ1    | 0.202  | 0.298 | 0.68   | 0.497 | 1.224 | 0.364 | 0.615  | 0.538 | 0.683 | 2.194 |
| ZMAT5    | 0.144  | 0.295 | 0.488  | 0.625 | 1.155 | 0.341 | 0.455  | 0.649 | 0.647 | 2.061 |
| ZMAT4    | -0.2   | 0.298 | -0.671 | 0.502 | 0.819 | 0.244 | -0.743 | 0.458 | 0.457 | 1.468 |
| ZMAT3    | -0.94  | 0.316 | -2.973 | 0.003 | 0.391 | 0.123 | -4.934 | 0     | 0.21  | 0.726 |
| ZKSCAN8  | 0.404  | 0.298 | 1.356  | 0.175 | 1.497 | 0.446 | 1.115  | 0.265 | 0.835 | 2.685 |
| ZKSCAN7  | -0.463 | 0.303 | -1.531 | 0.126 | 0.629 | 0.19  | -1.948 | 0.051 | 0.348 | 1.138 |
| ZKSCAN5  | -0.557 | 0.306 | -1.823 | 0.068 | 0.573 | 0.175 | -2.44  | 0.015 | 0.315 | 1.043 |
| ZKSCAN4  | 0.071  | 0.295 | 0.242  | 0.809 | 1.074 | 0.317 | 0.233  | 0.815 | 0.602 | 1.916 |
| ZKSCAN3  | 0.587  | 0.303 | 1.939  | 0.053 | 1.798 | 0.544 | 1.466  | 0.143 | 0.994 | 3.255 |
| ZKSCAN1  | 0.058  | 0.297 | 0.195  | 0.845 | 1.06  | 0.314 | 0.19   | 0.85  | 0.592 | 1.895 |
| ZIC4     | 0.149  | 0.297 | 0.501  | 0.616 | 1.16  | 0.345 | 0.466  | 0.641 | 0.648 | 2.077 |
| ZIC3     | -0.457 | 0.302 | -1.511 | 0.131 | 0.633 | 0.192 | -1.915 | 0.055 | 0.35  | 1.145 |
| ZIC1     | -0.399 | 0.3   | -1.33  | 0.184 | 0.671 | 0.201 | -1.634 | 0.102 | 0.373 | 1.208 |
| ZHX3     | -0.68  | 0.306 | -2.221 | 0.026 | 0.506 | 0.155 | -3.181 | 0.001 | 0.278 | 0.923 |
| ZHX2     | -0.352 | 0.3   | -1.174 | 0.241 | 0.703 | 0.211 | -1.407 | 0.159 | 0.39  | 1.266 |
| ZGPAT    | 0.038  | 0.295 | 0.129  | 0.897 | 1.039 | 0.307 | 0.127  | 0.899 | 0.583 | 1.852 |
| ZG16     | 0.158  | 0.296 | 0.532  | 0.595 | 1.171 | 0.347 | 0.492  | 0.623 | 0.655 | 2.092 |
| ZFYVE9   | 0.479  | 0.303 | 1.582  | 0.114 | 1.615 | 0.489 | 1.257  | 0.209 | 0.892 | 2.923 |
| ZFYVE26  | 0.352  | 0.299 | 1.179  | 0.239 | 1.422 | 0.425 | 0.993  | 0.321 | 0.792 | 2.554 |
| ZFYVE21  | -0.29  | 0.301 | -0.963 | 0.336 | 0.749 | 0.225 | -1.116 | 0.264 | 0.415 | 1.35  |
| ZFYVE16  | -0.602 | 0.31  | -1.942 | 0.052 | 0.548 | 0.17  | -2.665 | 0.008 | 0.298 | 1.005 |
| ZFY      | 0.073  | 0.295 | 0.248  | 0.804 | 1.076 | 0.318 | 0.239  | 0.811 | 0.603 | 1.92  |
| ZFX      | -0.276 | 0.298 | -0.927 | 0.354 | 0.759 | 0.226 | -1.068 | 0.286 | 0.423 | 1.36  |
| ZFR2     | 0.067  | 0.296 | 0.228  | 0.82  | 1.07  | 0.316 | 0.22   | 0.826 | 0.599 | 1.91  |
| ZFR      | 0.149  | 0.296 | 0.504  | 0.615 | 1.161 | 0.344 | 0.468  | 0.64  | 0.65  | 2.074 |
| ZFPM2    | -0.515 | 0.302 | -1.705 | 0.088 | 0.597 | 0.181 | -2.23  | 0.026 | 0.33  | 1.08  |
| ZFPL1    | 0.005  | 0.295 | 0.016  | 0.987 | 1.005 | 0.297 | 0.016  | 0.987 | 0.563 | 1.792 |
| ZFP69B   | 0.616  | 0.306 | 2.009  | 0.044 | 1.851 | 0.567 | 1.5    | 0.134 | 1.015 | 3.375 |



|          |        |       |        |       |       |       |        |       |       |       |
|----------|--------|-------|--------|-------|-------|-------|--------|-------|-------|-------|
| ZFP64    | 0.229  | 0.296 | 0.774  | 0.439 | 1.258 | 0.372 | 0.692  | 0.489 | 0.704 | 2.247 |
| ZFP37    | 0.349  | 0.3   | 1.165  | 0.244 | 1.418 | 0.425 | 0.983  | 0.325 | 0.788 | 2.552 |
| ZFP36L2  | -0.733 | 0.306 | -2.395 | 0.017 | 0.481 | 0.147 | -3.532 | 0     | 0.264 | 0.875 |
| ZFP36L1  | -0.113 | 0.295 | -0.382 | 0.702 | 0.893 | 0.264 | -0.405 | 0.686 | 0.501 | 1.593 |
| ZFP36    | -0.174 | 0.296 | -0.587 | 0.558 | 0.841 | 0.249 | -0.641 | 0.522 | 0.471 | 1.502 |
| ZFP30    | -0.1   | 0.296 | -0.337 | 0.736 | 0.905 | 0.268 | -0.355 | 0.723 | 0.507 | 1.616 |
| ZFP2     | -0.431 | 0.303 | -1.423 | 0.155 | 0.65  | 0.197 | -1.779 | 0.075 | 0.359 | 1.177 |
| ZFHX4    | -0.569 | 0.302 | -1.88  | 0.06  | 0.566 | 0.171 | -2.532 | 0.011 | 0.313 | 1.025 |
| ZFHX3    | -0.183 | 0.297 | -0.617 | 0.537 | 0.833 | 0.247 | -0.677 | 0.498 | 0.466 | 1.489 |
| ZFHX2    | 0.536  | 0.301 | 1.783  | 0.075 | 1.709 | 0.513 | 1.38   | 0.168 | 0.948 | 3.079 |
| ZFC3H1   | -0.072 | 0.296 | -0.242 | 0.809 | 0.931 | 0.276 | -0.25  | 0.802 | 0.521 | 1.663 |
| ZFAND6   | -0.437 | 0.302 | -1.446 | 0.148 | 0.646 | 0.195 | -1.814 | 0.07  | 0.357 | 1.168 |
| ZFAND5   | -0.324 | 0.298 | -1.087 | 0.277 | 0.723 | 0.216 | -1.283 | 0.199 | 0.403 | 1.298 |
| ZFAND3   | -1.002 | 0.317 | -3.164 | 0.002 | 0.367 | 0.116 | -5.445 | 0     | 0.197 | 0.683 |
| ZFAND1   | 0.128  | 0.296 | 0.433  | 0.665 | 1.136 | 0.336 | 0.406  | 0.685 | 0.637 | 2.028 |
| ZER1     | -0.794 | 0.31  | -2.559 | 0.011 | 0.452 | 0.14  | -3.907 | 0     | 0.246 | 0.83  |
| ZEB2     | -0.455 | 0.3   | -1.515 | 0.13  | 0.635 | 0.191 | -1.918 | 0.055 | 0.352 | 1.143 |
| ZEB1     | -0.661 | 0.306 | -2.162 | 0.031 | 0.516 | 0.158 | -3.065 | 0.002 | 0.283 | 0.94  |
| ZDHHC8P1 | -0.001 | 0.295 | -0.005 | 0.996 | 0.999 | 0.295 | -0.005 | 0.996 | 0.56  | 1.782 |
| ZDHHC7   | -0.023 | 0.295 | -0.077 | 0.938 | 0.977 | 0.289 | -0.078 | 0.938 | 0.548 | 1.743 |
| ZDHHC6   | 0.293  | 0.3   | 0.976  | 0.329 | 1.34  | 0.402 | 0.846  | 0.397 | 0.745 | 2.411 |
| ZDHHC4   | -0.12  | 0.295 | -0.405 | 0.686 | 0.887 | 0.262 | -0.43  | 0.667 | 0.497 | 1.583 |
| ZDHHC3   | -0.33  | 0.3   | -1.101 | 0.271 | 0.719 | 0.216 | -1.304 | 0.192 | 0.399 | 1.294 |
| ZDHHC18  | 0.191  | 0.296 | 0.645  | 0.519 | 1.211 | 0.359 | 0.587  | 0.557 | 0.677 | 2.164 |
| ZDHHC17  | -0.39  | 0.298 | -1.311 | 0.19  | 0.677 | 0.202 | -1.603 | 0.109 | 0.378 | 1.213 |
| ZDHHC14  | -0.17  | 0.3   | -0.568 | 0.57  | 0.844 | 0.253 | -0.619 | 0.536 | 0.469 | 1.518 |
| ZDHHC13  | 1.288  | 0.332 | 3.882  | 0     | 3.625 | 1.203 | 2.183  | 0.029 | 1.892 | 6.946 |
| ZCWPW1   | -0.358 | 0.3   | -1.193 | 0.233 | 0.699 | 0.21  | -1.434 | 0.152 | 0.389 | 1.259 |
| ZCCHC8   | -0.598 | 0.306 | -1.956 | 0.051 | 0.55  | 0.168 | -2.676 | 0.007 | 0.302 | 1.001 |
| ZCCHC4   | 0.021  | 0.296 | 0.072  | 0.942 | 1.022 | 0.302 | 0.072  | 0.943 | 0.572 | 1.824 |
| ZCCHC24  | -0.531 | 0.302 | -1.757 | 0.079 | 0.588 | 0.178 | -2.318 | 0.02  | 0.325 | 1.063 |
| ZCCHC2   | 0.137  | 0.295 | 0.463  | 0.643 | 1.147 | 0.339 | 0.433  | 0.665 | 0.643 | 2.046 |
| ZCCHC14  | -0.297 | 0.298 | -0.997 | 0.319 | 0.743 | 0.221 | -1.16  | 0.246 | 0.415 | 1.332 |
| ZCCHC10  | -0.279 | 0.301 | -0.925 | 0.355 | 0.757 | 0.228 | -1.067 | 0.286 | 0.419 | 1.366 |
| ZC4H2    | 0.323  | 0.298 | 1.085  | 0.278 | 1.381 | 0.411 | 0.927  | 0.354 | 0.771 | 2.474 |
| ZC3HAV1  | 0.045  | 0.298 | 0.149  | 0.881 | 1.046 | 0.312 | 0.146  | 0.884 | 0.583 | 1.875 |
| ZC3H7B   | 0.304  | 0.298 | 1.021  | 0.307 | 1.355 | 0.403 | 0.881  | 0.378 | 0.756 | 2.428 |
| ZC3H7A   | -0.335 | 0.298 | -1.124 | 0.261 | 0.716 | 0.213 | -1.335 | 0.182 | 0.399 | 1.282 |

|         |        |       |        |       |       |       |        |       |       |       |
|---------|--------|-------|--------|-------|-------|-------|--------|-------|-------|-------|
| ZC3H4   | 0.884  | 0.315 | 2.804  | 0.005 | 2.421 | 0.763 | 1.862  | 0.063 | 1.305 | 4.491 |
| ZC3H3   | 0.145  | 0.296 | 0.491  | 0.623 | 1.156 | 0.342 | 0.457  | 0.648 | 0.648 | 2.064 |
| ZC3H15  | 0.519  | 0.302 | 1.715  | 0.086 | 1.68  | 0.508 | 1.338  | 0.181 | 0.929 | 3.038 |
| ZC3H14  | -0.127 | 0.296 | -0.427 | 0.669 | 0.881 | 0.261 | -0.455 | 0.649 | 0.493 | 1.575 |
| ZC3H13  | -0.141 | 0.296 | -0.477 | 0.633 | 0.868 | 0.257 | -0.512 | 0.608 | 0.486 | 1.552 |
| ZC2HC1C | 0.309  | 0.297 | 1.042  | 0.297 | 1.363 | 0.404 | 0.897  | 0.37  | 0.762 | 2.438 |
| ZC2HC1A | 0.712  | 0.306 | 2.327  | 0.02  | 2.038 | 0.624 | 1.665  | 0.096 | 1.119 | 3.713 |
| ZBTB7C  | -0.326 | 0.3   | -1.087 | 0.277 | 0.722 | 0.217 | -1.285 | 0.199 | 0.401 | 1.299 |
| ZBTB7B  | -0.403 | 0.302 | -1.334 | 0.182 | 0.668 | 0.202 | -1.643 | 0.1   | 0.369 | 1.209 |
| ZBTB7A  | 0.226  | 0.297 | 0.762  | 0.446 | 1.254 | 0.372 | 0.682  | 0.495 | 0.701 | 2.244 |
| ZBTB6   | -0.108 | 0.295 | -0.365 | 0.715 | 0.898 | 0.265 | -0.385 | 0.7   | 0.503 | 1.602 |
| ZBTB5   | -0.103 | 0.296 | -0.348 | 0.728 | 0.902 | 0.267 | -0.366 | 0.714 | 0.505 | 1.611 |
| ZBTB48  | -1.106 | 0.347 | -3.186 | 0.001 | 0.331 | 0.115 | -5.825 | 0     | 0.168 | 0.653 |
| ZBTB44  | -0.361 | 0.299 | -1.209 | 0.227 | 0.697 | 0.208 | -1.456 | 0.145 | 0.388 | 1.252 |
| ZBTB43  | 0.491  | 0.302 | 1.624  | 0.104 | 1.634 | 0.494 | 1.284  | 0.199 | 0.904 | 2.955 |
| ZBTB40  | -0.189 | 0.296 | -0.638 | 0.524 | 0.828 | 0.245 | -0.702 | 0.483 | 0.463 | 1.479 |
| ZBTB39  | 0.427  | 0.3   | 1.424  | 0.154 | 1.532 | 0.459 | 1.159  | 0.246 | 0.852 | 2.756 |
| ZBTB38  | 0.295  | 0.298 | 0.991  | 0.321 | 1.343 | 0.4   | 0.859  | 0.391 | 0.75  | 2.406 |
| ZBTB33  | -0.142 | 0.295 | -0.481 | 0.631 | 0.868 | 0.256 | -0.516 | 0.606 | 0.486 | 1.548 |
| ZBTB32  | 0.113  | 0.295 | 0.384  | 0.701 | 1.12  | 0.331 | 0.363  | 0.717 | 0.628 | 1.999 |
| ZBTB3   | 0.07   | 0.295 | 0.237  | 0.812 | 1.073 | 0.317 | 0.229  | 0.819 | 0.601 | 1.914 |
| ZBTB25  | 0.379  | 0.3   | 1.264  | 0.206 | 1.46  | 0.438 | 1.052  | 0.293 | 0.812 | 2.628 |
| ZBTB24  | 0.459  | 0.307 | 1.495  | 0.135 | 1.582 | 0.486 | 1.199  | 0.231 | 0.867 | 2.888 |
| ZBTB22  | -0.016 | 0.296 | -0.055 | 0.956 | 0.984 | 0.291 | -0.055 | 0.956 | 0.551 | 1.757 |
| ZBTB20  | -0.23  | 0.296 | -0.775 | 0.438 | 0.795 | 0.235 | -0.872 | 0.383 | 0.445 | 1.42  |
| ZBTB18  | -0.062 | 0.295 | -0.209 | 0.834 | 0.94  | 0.278 | -0.216 | 0.829 | 0.527 | 1.677 |
| ZBTB17  | -0.164 | 0.296 | -0.554 | 0.579 | 0.849 | 0.251 | -0.602 | 0.547 | 0.475 | 1.516 |
| ZBTB16  | -0.33  | 0.3   | -1.102 | 0.271 | 0.719 | 0.215 | -1.305 | 0.192 | 0.399 | 1.293 |
| ZBTB14  | 0.126  | 0.296 | 0.425  | 0.671 | 1.134 | 0.336 | 0.399  | 0.69  | 0.634 | 2.028 |
| ZBTB11  | -0.261 | 0.296 | -0.881 | 0.378 | 0.77  | 0.228 | -1.007 | 0.314 | 0.431 | 1.377 |
| ZBTB10  | 0.354  | 0.3   | 1.182  | 0.237 | 1.425 | 0.427 | 0.995  | 0.32  | 0.792 | 2.565 |
| ZBTB1   | -0.49  | 0.302 | -1.621 | 0.105 | 0.613 | 0.185 | -2.091 | 0.037 | 0.339 | 1.108 |
| ZBP1    | 0.183  | 0.296 | 0.617  | 0.537 | 1.201 | 0.356 | 0.564  | 0.573 | 0.672 | 2.146 |
| ZBED8   | -0.437 | 0.302 | -1.445 | 0.148 | 0.646 | 0.195 | -1.812 | 0.07  | 0.357 | 1.168 |
| ZBED5   | -0.208 | 0.296 | -0.701 | 0.483 | 0.812 | 0.241 | -0.779 | 0.436 | 0.455 | 1.452 |
| ZBED4   | 0.002  | 0.296 | 0.005  | 0.996 | 1.002 | 0.297 | 0.005  | 0.996 | 0.56  | 1.79  |
| ZBED2   | -0.304 | 0.297 | -1.023 | 0.306 | 0.738 | 0.219 | -1.195 | 0.232 | 0.412 | 1.321 |
| ZBED1   | 0.041  | 0.296 | 0.138  | 0.89  | 1.042 | 0.308 | 0.136  | 0.892 | 0.583 | 1.861 |

|        |        |       |        |       |       |       |        |       |       |       |
|--------|--------|-------|--------|-------|-------|-------|--------|-------|-------|-------|
| ZBBX   | 0.05   | 0.295 | 0.17   | 0.865 | 1.051 | 0.311 | 0.165  | 0.869 | 0.589 | 1.876 |
| ZAP70  | -0.751 | 0.31  | -2.421 | 0.015 | 0.472 | 0.146 | -3.608 | 0     | 0.257 | 0.867 |
| YY1AP1 | 0.361  | 0.299 | 1.208  | 0.227 | 1.435 | 0.428 | 1.014  | 0.31  | 0.799 | 2.576 |
| YY1    | 0.199  | 0.299 | 0.665  | 0.506 | 1.22  | 0.365 | 0.603  | 0.547 | 0.679 | 2.191 |
| YWHAZ  | 0.455  | 0.303 | 1.502  | 0.133 | 1.576 | 0.477 | 1.207  | 0.227 | 0.871 | 2.852 |
| YWHAQ  | 0.417  | 0.3   | 1.393  | 0.163 | 1.518 | 0.455 | 1.139  | 0.255 | 0.844 | 2.731 |
| YWHAH  | -0.429 | 0.302 | -1.42  | 0.155 | 0.651 | 0.197 | -1.774 | 0.076 | 0.36  | 1.177 |
| YWHAE  | -0.061 | 0.296 | -0.207 | 0.836 | 0.941 | 0.278 | -0.213 | 0.831 | 0.527 | 1.68  |
| YWHAB  | 0.154  | 0.299 | 0.514  | 0.607 | 1.166 | 0.349 | 0.477  | 0.634 | 0.649 | 2.097 |
| YTHDF3 | 0.396  | 0.302 | 1.309  | 0.191 | 1.486 | 0.449 | 1.081  | 0.28  | 0.821 | 2.687 |
| YTHDF2 | 0.052  | 0.297 | 0.177  | 0.86  | 1.054 | 0.313 | 0.172  | 0.863 | 0.589 | 1.885 |
| YTHDF1 | 0.816  | 0.315 | 2.593  | 0.01  | 2.261 | 0.712 | 1.772  | 0.076 | 1.22  | 4.191 |
| YTHDC2 | -0.012 | 0.296 | -0.041 | 0.968 | 0.988 | 0.292 | -0.041 | 0.967 | 0.554 | 1.763 |
| YTHDC1 | 0.255  | 0.301 | 0.849  | 0.396 | 1.291 | 0.388 | 0.749  | 0.454 | 0.716 | 2.328 |
| YRDC   | 0.683  | 0.306 | 2.235  | 0.025 | 1.98  | 0.605 | 1.619  | 0.105 | 1.088 | 3.604 |
| YPEL5  | -0.435 | 0.302 | -1.44  | 0.15  | 0.647 | 0.196 | -1.804 | 0.071 | 0.358 | 1.17  |
| YPEL1  | 0.615  | 0.306 | 2.013  | 0.044 | 1.85  | 0.565 | 1.504  | 0.133 | 1.016 | 3.367 |
| YOD1   | -0.19  | 0.296 | -0.64  | 0.522 | 0.827 | 0.245 | -0.705 | 0.481 | 0.463 | 1.479 |
| YME1L1 | 0.466  | 0.301 | 1.549  | 0.121 | 1.593 | 0.479 | 1.238  | 0.216 | 0.884 | 2.871 |
| YLPM1  | -0.025 | 0.295 | -0.085 | 0.932 | 0.975 | 0.288 | -0.086 | 0.931 | 0.547 | 1.739 |
| YKT6   | 0.241  | 0.295 | 0.817  | 0.414 | 1.273 | 0.376 | 0.726  | 0.468 | 0.713 | 2.272 |
| YJU2   | -0.257 | 0.301 | -0.855 | 0.393 | 0.773 | 0.233 | -0.975 | 0.33  | 0.429 | 1.394 |
| YIPF6  | 0.618  | 0.304 | 2.034  | 0.042 | 1.855 | 0.564 | 1.518  | 0.129 | 1.023 | 3.365 |
| YIPF5  | -0.331 | 0.3   | -1.104 | 0.27  | 0.718 | 0.215 | -1.309 | 0.191 | 0.399 | 1.292 |
| YIPF4  | -0.152 | 0.296 | -0.513 | 0.608 | 0.859 | 0.254 | -0.554 | 0.579 | 0.481 | 1.535 |
| YIPF3  | 0.341  | 0.298 | 1.144  | 0.252 | 1.406 | 0.418 | 0.97   | 0.332 | 0.785 | 2.519 |
| YIPF2  | 0.019  | 0.295 | 0.065  | 0.948 | 1.019 | 0.301 | 0.064  | 0.949 | 0.571 | 1.818 |
| YIPF1  | -0.357 | 0.3   | -1.191 | 0.234 | 0.7   | 0.21  | -1.43  | 0.153 | 0.389 | 1.259 |
| YIF1A  | 0.386  | 0.298 | 1.298  | 0.194 | 1.472 | 0.438 | 1.077  | 0.282 | 0.821 | 2.637 |
| YES1   | 0.091  | 0.298 | 0.306  | 0.76  | 1.095 | 0.326 | 0.292  | 0.77  | 0.611 | 1.963 |
| YEATS4 | 0.122  | 0.296 | 0.411  | 0.681 | 1.13  | 0.335 | 0.387  | 0.699 | 0.632 | 2.019 |
| YEATS2 | 0.89   | 0.321 | 2.778  | 0.005 | 2.436 | 0.781 | 1.839  | 0.066 | 1.3   | 4.566 |
| YBX3   | -0.034 | 0.296 | -0.115 | 0.908 | 0.967 | 0.286 | -0.117 | 0.907 | 0.541 | 1.726 |
| YBX2   | 0.386  | 0.298 | 1.299  | 0.194 | 1.472 | 0.438 | 1.077  | 0.281 | 0.821 | 2.637 |
| YBX1   | -0.11  | 0.295 | -0.374 | 0.709 | 0.895 | 0.265 | -0.395 | 0.693 | 0.502 | 1.598 |
| YARS2  | 0.377  | 0.3   | 1.257  | 0.209 | 1.458 | 0.437 | 1.047  | 0.295 | 0.81  | 2.624 |
| YARS1  | -0.151 | 0.296 | -0.508 | 0.612 | 0.86  | 0.255 | -0.548 | 0.584 | 0.481 | 1.538 |
| YAP1   | 0.629  | 0.306 | 2.056  | 0.04  | 1.876 | 0.574 | 1.526  | 0.127 | 1.03  | 3.417 |

|         |        |       |        |       |       |       |        |       |       |       |
|---------|--------|-------|--------|-------|-------|-------|--------|-------|-------|-------|
| YAF2    | -0.144 | 0.296 | -0.486 | 0.627 | 0.866 | 0.256 | -0.523 | 0.601 | 0.485 | 1.547 |
| XYLT2   | 0.112  | 0.297 | 0.377  | 0.706 | 1.118 | 0.332 | 0.357  | 0.721 | 0.625 | 2.001 |
| XYLT1   | -0.189 | 0.296 | -0.64  | 0.522 | 0.828 | 0.245 | -0.705 | 0.481 | 0.464 | 1.477 |
| XYLB    | 0.413  | 0.298 | 1.384  | 0.167 | 1.511 | 0.451 | 1.134  | 0.257 | 0.842 | 2.711 |
| XRCC6   | -0.124 | 0.296 | -0.419 | 0.675 | 0.883 | 0.261 | -0.446 | 0.655 | 0.495 | 1.578 |
| XRCC5   | -0.198 | 0.296 | -0.668 | 0.504 | 0.82  | 0.243 | -0.738 | 0.46  | 0.459 | 1.467 |
| XRCC4   | 0.453  | 0.298 | 1.519  | 0.129 | 1.573 | 0.469 | 1.221  | 0.222 | 0.877 | 2.822 |
| XRCC3   | 0.534  | 0.306 | 1.745  | 0.081 | 1.705 | 0.521 | 1.352  | 0.176 | 0.936 | 3.105 |
| XRCC2   | 0.769  | 0.31  | 2.482  | 0.013 | 2.158 | 0.669 | 1.731  | 0.083 | 1.176 | 3.961 |
| XRCC1   | 0.23   | 0.296 | 0.777  | 0.437 | 1.258 | 0.372 | 0.694  | 0.488 | 0.705 | 2.247 |
| XPOT    | 0.373  | 0.3   | 1.242  | 0.214 | 1.452 | 0.436 | 1.037  | 0.3   | 0.806 | 2.617 |
| XPO7    | -0.053 | 0.295 | -0.18  | 0.857 | 0.948 | 0.28  | -0.185 | 0.853 | 0.532 | 1.691 |
| XPO6    | 0.34   | 0.3   | 1.136  | 0.256 | 1.406 | 0.421 | 0.963  | 0.336 | 0.781 | 2.529 |
| XPO4    | 0.283  | 0.296 | 0.956  | 0.339 | 1.327 | 0.393 | 0.832  | 0.405 | 0.743 | 2.372 |
| XPO1    | 0.306  | 0.302 | 1.014  | 0.311 | 1.358 | 0.41  | 0.874  | 0.382 | 0.752 | 2.453 |
| XPNPEP3 | 0.304  | 0.298 | 1.023  | 0.306 | 1.356 | 0.403 | 0.882  | 0.378 | 0.757 | 2.429 |
| XPNPEP2 | -0.09  | 0.295 | -0.304 | 0.761 | 0.914 | 0.27  | -0.319 | 0.75  | 0.512 | 1.631 |
| XPNPEP1 | 0.073  | 0.296 | 0.246  | 0.806 | 1.075 | 0.318 | 0.237  | 0.813 | 0.602 | 1.921 |
| XPC     | -0.098 | 0.295 | -0.33  | 0.741 | 0.907 | 0.268 | -0.347 | 0.728 | 0.509 | 1.618 |
| XPA     | 0.35   | 0.298 | 1.174  | 0.24  | 1.419 | 0.423 | 0.991  | 0.322 | 0.791 | 2.546 |
| XKR8    | -0.577 | 0.304 | -1.899 | 0.058 | 0.562 | 0.171 | -2.569 | 0.01  | 0.31  | 1.019 |
| XK      | 0.081  | 0.295 | 0.273  | 0.785 | 1.084 | 0.32  | 0.262  | 0.793 | 0.608 | 1.934 |
| XIST    | -0.318 | 0.298 | -1.068 | 0.286 | 0.728 | 0.217 | -1.257 | 0.209 | 0.406 | 1.304 |
| XIAP    | -0.148 | 0.296 | -0.502 | 0.616 | 0.862 | 0.255 | -0.541 | 0.588 | 0.483 | 1.539 |
| XDH     | 0.082  | 0.297 | 0.277  | 0.782 | 1.086 | 0.323 | 0.266  | 0.79  | 0.606 | 1.945 |
| XCR1    | 0.202  | 0.296 | 0.683  | 0.495 | 1.224 | 0.363 | 0.618  | 0.536 | 0.685 | 2.188 |
| XCL1    | -0.107 | 0.296 | -0.362 | 0.717 | 0.899 | 0.266 | -0.382 | 0.703 | 0.504 | 1.604 |
| XBP1    | -0.159 | 0.296 | -0.537 | 0.591 | 0.853 | 0.253 | -0.583 | 0.56  | 0.477 | 1.524 |
| XAF1    | 0.394  | 0.301 | 1.309  | 0.19  | 1.483 | 0.446 | 1.082  | 0.279 | 0.822 | 2.673 |
| XAB2    | -0.661 | 0.31  | -2.133 | 0.033 | 0.516 | 0.16  | -3.022 | 0.003 | 0.281 | 0.948 |
| WWTR1   | -0.45  | 0.298 | -1.51  | 0.131 | 0.637 | 0.19  | -1.907 | 0.056 | 0.355 | 1.144 |
| WWP2    | 0.651  | 0.303 | 2.148  | 0.032 | 1.917 | 0.581 | 1.579  | 0.114 | 1.059 | 3.471 |
| WWP1    | -0.251 | 0.298 | -0.842 | 0.4   | 0.778 | 0.232 | -0.957 | 0.339 | 0.434 | 1.395 |
| WWOX    | 0.279  | 0.298 | 0.936  | 0.349 | 1.322 | 0.394 | 0.817  | 0.414 | 0.737 | 2.37  |
| WWC3    | -0.172 | 0.295 | -0.584 | 0.559 | 0.842 | 0.249 | -0.637 | 0.524 | 0.472 | 1.501 |
| WWC1    | 0.229  | 0.296 | 0.772  | 0.44  | 1.257 | 0.372 | 0.69   | 0.49  | 0.703 | 2.246 |
| WTAP    | -0.282 | 0.3   | -0.941 | 0.347 | 0.754 | 0.226 | -1.087 | 0.277 | 0.419 | 1.357 |
| WT1-AS  | 0.238  | 0.298 | 0.798  | 0.425 | 1.268 | 0.378 | 0.711  | 0.477 | 0.708 | 2.273 |

|         |        |       |        |       |       |       |        |       |       |       |
|---------|--------|-------|--------|-------|-------|-------|--------|-------|-------|-------|
| WT1     | -0.009 | 0.296 | -0.03  | 0.976 | 0.991 | 0.293 | -0.03  | 0.976 | 0.555 | 1.77  |
| WSCD2   | -0.54  | 0.302 | -1.784 | 0.074 | 0.583 | 0.176 | -2.366 | 0.018 | 0.322 | 1.055 |
| WSB2    | -0.173 | 0.298 | -0.58  | 0.562 | 0.841 | 0.251 | -0.633 | 0.527 | 0.469 | 1.509 |
| WSB1    | 0.128  | 0.296 | 0.433  | 0.665 | 1.137 | 0.337 | 0.406  | 0.685 | 0.636 | 2.032 |
| WRNIP1  | -0.066 | 0.296 | -0.223 | 0.824 | 0.936 | 0.277 | -0.23  | 0.818 | 0.525 | 1.671 |
| WRN     | 0.123  | 0.297 | 0.416  | 0.678 | 1.131 | 0.336 | 0.391  | 0.696 | 0.632 | 2.024 |
| WRAP73  | 0.018  | 0.3   | 0.061  | 0.952 | 1.018 | 0.305 | 0.06   | 0.952 | 0.566 | 1.832 |
| WRAP53  | 0.061  | 0.296 | 0.207  | 0.836 | 1.063 | 0.315 | 0.201  | 0.841 | 0.595 | 1.899 |
| WNT8B   | 0.444  | 0.299 | 1.485  | 0.137 | 1.56  | 0.467 | 1.199  | 0.23  | 0.868 | 2.803 |
| WNT7B   | -0.09  | 0.295 | -0.303 | 0.762 | 0.914 | 0.27  | -0.317 | 0.751 | 0.513 | 1.631 |
| WNT7A   | -0.072 | 0.297 | -0.241 | 0.809 | 0.931 | 0.276 | -0.25  | 0.803 | 0.52  | 1.665 |
| WNT6    | 0.001  | 0.299 | 0.005  | 0.996 | 1.001 | 0.299 | 0.005  | 0.996 | 0.557 | 1.799 |
| WNT5B   | 0.247  | 0.3   | 0.823  | 0.41  | 1.28  | 0.384 | 0.729  | 0.466 | 0.711 | 2.306 |
| WNT5A   | -0.481 | 0.302 | -1.59  | 0.112 | 0.618 | 0.187 | -2.042 | 0.041 | 0.342 | 1.118 |
| WNT4    | -0.873 | 0.328 | -2.662 | 0.008 | 0.418 | 0.137 | -4.252 | 0     | 0.22  | 0.794 |
| WNT2B   | 0.14   | 0.299 | 0.468  | 0.64  | 1.15  | 0.343 | 0.437  | 0.662 | 0.641 | 2.064 |
| WNT2    | -0.244 | 0.296 | -0.824 | 0.41  | 0.783 | 0.232 | -0.934 | 0.351 | 0.438 | 1.4   |
| WNT16   | 0.3    | 0.298 | 1.006  | 0.314 | 1.35  | 0.403 | 0.869  | 0.385 | 0.752 | 2.423 |
| WNT11   | 0.091  | 0.295 | 0.309  | 0.757 | 1.096 | 0.324 | 0.295  | 0.768 | 0.614 | 1.954 |
| WNT10B  | 0.634  | 0.31  | 2.048  | 0.041 | 1.885 | 0.584 | 1.516  | 0.129 | 1.027 | 3.459 |
| WNT1    | -0.052 | 0.295 | -0.176 | 0.86  | 0.949 | 0.28  | -0.181 | 0.856 | 0.532 | 1.693 |
| WNK1    | -0.857 | 0.315 | -2.718 | 0.007 | 0.425 | 0.134 | -4.3   | 0     | 0.229 | 0.787 |
| WLS     | -0.762 | 0.315 | -2.421 | 0.015 | 0.467 | 0.147 | -3.632 | 0     | 0.252 | 0.865 |
| WIZ     | 0.731  | 0.31  | 2.358  | 0.018 | 2.077 | 0.644 | 1.673  | 0.094 | 1.131 | 3.813 |
| WIPI2   | 0.427  | 0.3   | 1.42   | 0.155 | 1.532 | 0.46  | 1.156  | 0.248 | 0.85  | 2.76  |
| WIPI1   | -0.367 | 0.3   | -1.224 | 0.221 | 0.693 | 0.208 | -1.479 | 0.139 | 0.385 | 1.247 |
| WIPF2   | 0.362  | 0.298 | 1.216  | 0.224 | 1.436 | 0.428 | 1.02   | 0.308 | 0.801 | 2.574 |
| WIPF1   | -0.784 | 0.306 | -2.56  | 0.01  | 0.457 | 0.14  | -3.887 | 0     | 0.251 | 0.832 |
| WIF1    | -0.127 | 0.296 | -0.429 | 0.668 | 0.881 | 0.26  | -0.458 | 0.647 | 0.494 | 1.572 |
| WHRN    | 0.11   | 0.296 | 0.372  | 0.71  | 1.117 | 0.331 | 0.352  | 0.725 | 0.625 | 1.996 |
| WFS1    | 0.115  | 0.295 | 0.389  | 0.697 | 1.122 | 0.331 | 0.368  | 0.713 | 0.629 | 2.001 |
| WFDC8   | 0.407  | 0.3   | 1.356  | 0.175 | 1.502 | 0.45  | 1.114  | 0.265 | 0.834 | 2.703 |
| WFDC2   | 0.258  | 0.296 | 0.871  | 0.384 | 1.294 | 0.383 | 0.768  | 0.443 | 0.724 | 2.313 |
| WFDC1   | -0.303 | 0.298 | -1.015 | 0.31  | 0.739 | 0.22  | -1.186 | 0.236 | 0.412 | 1.325 |
| WEE1    | -0.143 | 0.298 | -0.48  | 0.631 | 0.867 | 0.259 | -0.516 | 0.606 | 0.483 | 1.555 |
| WDTC1   | -0.168 | 0.296 | -0.566 | 0.571 | 0.846 | 0.251 | -0.616 | 0.538 | 0.473 | 1.511 |
| WDR91   | -0.327 | 0.3   | -1.091 | 0.275 | 0.721 | 0.216 | -1.29  | 0.197 | 0.401 | 1.297 |
| WDR83OS | -0.339 | 0.304 | -1.114 | 0.265 | 0.712 | 0.217 | -1.327 | 0.185 | 0.392 | 1.294 |

|        |        |       |        |       |       |       |        |       |       |       |
|--------|--------|-------|--------|-------|-------|-------|--------|-------|-------|-------|
| WDR82  | 0.033  | 0.296 | 0.112  | 0.911 | 1.034 | 0.306 | 0.11   | 0.913 | 0.578 | 1.848 |
| WDR77  | 0.388  | 0.3   | 1.294  | 0.195 | 1.474 | 0.441 | 1.073  | 0.283 | 0.819 | 2.651 |
| WDR76  | 1.349  | 0.337 | 3.998  | 0     | 3.854 | 1.301 | 2.194  | 0.028 | 1.989 | 7.468 |
| WDR74  | 0.098  | 0.295 | 0.331  | 0.741 | 1.103 | 0.326 | 0.315  | 0.753 | 0.618 | 1.968 |
| WDR73  | 0.21   | 0.296 | 0.708  | 0.479 | 1.233 | 0.366 | 0.638  | 0.523 | 0.69  | 2.205 |
| WDR70  | 0.979  | 0.321 | 3.049  | 0.002 | 2.661 | 0.854 | 1.945  | 0.052 | 1.418 | 4.992 |
| WDR7   | 0.033  | 0.296 | 0.113  | 0.91  | 1.034 | 0.306 | 0.111  | 0.911 | 0.579 | 1.847 |
| WDR62  | 0.434  | 0.3   | 1.448  | 0.148 | 1.544 | 0.463 | 1.174  | 0.24  | 0.858 | 2.778 |
| WDR61  | -0.043 | 0.297 | -0.144 | 0.886 | 0.958 | 0.285 | -0.147 | 0.883 | 0.535 | 1.715 |
| WDR6   | -0.634 | 0.304 | -2.087 | 0.037 | 0.53  | 0.161 | -2.914 | 0.004 | 0.292 | 0.962 |
| WDR5B  | 0.133  | 0.297 | 0.449  | 0.653 | 1.142 | 0.339 | 0.421  | 0.674 | 0.639 | 2.043 |
| WDR59  | 0.04   | 0.295 | 0.136  | 0.892 | 1.041 | 0.308 | 0.133  | 0.894 | 0.583 | 1.857 |
| WDR55  | 0.452  | 0.302 | 1.496  | 0.135 | 1.572 | 0.475 | 1.203  | 0.229 | 0.869 | 2.842 |
| WDR48  | -0.218 | 0.298 | -0.732 | 0.464 | 0.804 | 0.239 | -0.818 | 0.414 | 0.449 | 1.441 |
| WDR47  | 0.246  | 0.296 | 0.829  | 0.407 | 1.278 | 0.379 | 0.735  | 0.462 | 0.715 | 2.284 |
| WDR46  | 0.172  | 0.296 | 0.58   | 0.562 | 1.188 | 0.352 | 0.533  | 0.594 | 0.664 | 2.123 |
| WDR45B | 0.497  | 0.306 | 1.624  | 0.104 | 1.644 | 0.503 | 1.28   | 0.201 | 0.902 | 2.995 |
| WDR45  | -0.577 | 0.31  | -1.857 | 0.063 | 0.562 | 0.174 | -2.512 | 0.012 | 0.306 | 1.032 |
| WDR44  | -0.339 | 0.303 | -1.118 | 0.264 | 0.713 | 0.216 | -1.331 | 0.183 | 0.394 | 1.29  |
| WDR43  | 0.881  | 0.321 | 2.747  | 0.006 | 2.412 | 0.773 | 1.827  | 0.068 | 1.287 | 4.521 |
| WDR41  | 0.05   | 0.296 | 0.169  | 0.865 | 1.052 | 0.312 | 0.165  | 0.869 | 0.588 | 1.879 |
| WDR4   | 0.24   | 0.295 | 0.811  | 0.418 | 1.271 | 0.375 | 0.721  | 0.471 | 0.712 | 2.267 |
| WDR37  | -0.637 | 0.306 | -2.084 | 0.037 | 0.529 | 0.162 | -2.915 | 0.004 | 0.291 | 0.963 |
| WDR3   | 0.488  | 0.303 | 1.613  | 0.107 | 1.629 | 0.493 | 1.276  | 0.202 | 0.9   | 2.948 |
| WDR26  | 0.204  | 0.298 | 0.686  | 0.493 | 1.227 | 0.366 | 0.62   | 0.535 | 0.684 | 2.201 |
| WDR25  | -0.239 | 0.296 | -0.806 | 0.421 | 0.788 | 0.233 | -0.91  | 0.363 | 0.441 | 1.408 |
| WDR19  | -0.405 | 0.3   | -1.349 | 0.177 | 0.667 | 0.2   | -1.663 | 0.096 | 0.371 | 1.201 |
| WDR18  | 0.31   | 0.297 | 1.042  | 0.297 | 1.364 | 0.406 | 0.896  | 0.37  | 0.761 | 2.443 |
| WDR13  | -0.313 | 0.301 | -1.042 | 0.297 | 0.731 | 0.22  | -1.223 | 0.221 | 0.406 | 1.318 |
| WDR12  | 0.293  | 0.298 | 0.984  | 0.325 | 1.34  | 0.399 | 0.853  | 0.394 | 0.748 | 2.402 |
| WDR11  | 0.168  | 0.296 | 0.566  | 0.571 | 1.182 | 0.35  | 0.521  | 0.602 | 0.662 | 2.112 |
| WDR1   | 0.41   | 0.3   | 1.369  | 0.171 | 1.507 | 0.452 | 1.123  | 0.261 | 0.838 | 2.711 |
| WDHD1  | -0.004 | 0.295 | -0.015 | 0.988 | 0.996 | 0.294 | -0.015 | 0.988 | 0.558 | 1.777 |
| WDFY3  | 0.232  | 0.298 | 0.778  | 0.437 | 1.261 | 0.376 | 0.694  | 0.487 | 0.703 | 2.263 |
| WDCP   | 0.096  | 0.296 | 0.324  | 0.746 | 1.1   | 0.325 | 0.309  | 0.758 | 0.616 | 1.965 |
| WBP4   | 0.008  | 0.295 | 0.027  | 0.978 | 1.008 | 0.297 | 0.027  | 0.978 | 0.565 | 1.797 |
| WBP2   | -0.23  | 0.297 | -0.773 | 0.439 | 0.795 | 0.236 | -0.869 | 0.385 | 0.444 | 1.422 |
| WBP1L  | -0.249 | 0.298 | -0.838 | 0.402 | 0.779 | 0.232 | -0.951 | 0.342 | 0.435 | 1.397 |

|         |        |       |        |       |       |       |        |       |       |       |
|---------|--------|-------|--------|-------|-------|-------|--------|-------|-------|-------|
| WBP11   | 0.321  | 0.296 | 1.084  | 0.278 | 1.379 | 0.409 | 0.927  | 0.354 | 0.771 | 2.465 |
| WASL    | -0.04  | 0.298 | -0.134 | 0.894 | 0.961 | 0.286 | -0.137 | 0.891 | 0.536 | 1.724 |
| WASHC5  | 0.349  | 0.299 | 1.164  | 0.244 | 1.417 | 0.424 | 0.983  | 0.326 | 0.788 | 2.549 |
| WASHC4  | -0.762 | 0.315 | -2.421 | 0.015 | 0.467 | 0.147 | -3.629 | 0     | 0.252 | 0.865 |
| WASHC3  | -0.338 | 0.308 | -1.098 | 0.272 | 0.713 | 0.22  | -1.307 | 0.191 | 0.39  | 1.304 |
| WASHC2C | -0.223 | 0.296 | -0.751 | 0.453 | 0.8   | 0.237 | -0.841 | 0.4   | 0.448 | 1.431 |
| WASF3   | 0.186  | 0.296 | 0.627  | 0.53  | 1.204 | 0.357 | 0.573  | 0.567 | 0.674 | 2.151 |
| WASF2   | -0.444 | 0.302 | -1.47  | 0.142 | 0.641 | 0.194 | -1.85  | 0.064 | 0.355 | 1.16  |
| WASF1   | -0.103 | 0.296 | -0.347 | 0.729 | 0.902 | 0.267 | -0.365 | 0.715 | 0.505 | 1.612 |
| WAS     | -0.449 | 0.3   | -1.497 | 0.134 | 0.638 | 0.192 | -1.89  | 0.059 | 0.354 | 1.149 |
| WARS2   | -0.439 | 0.302 | -1.452 | 0.147 | 0.645 | 0.195 | -1.822 | 0.068 | 0.357 | 1.166 |
| WARS1   | -0.337 | 0.297 | -1.135 | 0.256 | 0.714 | 0.212 | -1.35  | 0.177 | 0.399 | 1.278 |
| WAPL    | -0.278 | 0.298 | -0.934 | 0.35  | 0.757 | 0.225 | -1.076 | 0.282 | 0.423 | 1.357 |
| WAC     | -0.396 | 0.299 | -1.322 | 0.186 | 0.673 | 0.201 | -1.622 | 0.105 | 0.374 | 1.21  |
| VWF     | -0.123 | 0.295 | -0.416 | 0.677 | 0.884 | 0.261 | -0.443 | 0.658 | 0.496 | 1.578 |
| VWA8    | -0.24  | 0.296 | -0.81  | 0.418 | 0.787 | 0.233 | -0.915 | 0.36  | 0.44  | 1.406 |
| VWA7    | -0.557 | 0.306 | -1.82  | 0.069 | 0.573 | 0.175 | -2.435 | 0.015 | 0.314 | 1.044 |
| VWA5A   | -0.589 | 0.303 | -1.944 | 0.052 | 0.555 | 0.168 | -2.647 | 0.008 | 0.306 | 1.005 |
| VWA1    | -0.622 | 0.306 | -2.035 | 0.042 | 0.537 | 0.164 | -2.823 | 0.005 | 0.295 | 0.977 |
| VTI1B   | -0.602 | 0.306 | -1.971 | 0.049 | 0.547 | 0.167 | -2.704 | 0.007 | 0.301 | 0.997 |
| VTCN1   | -0.322 | 0.3   | -1.075 | 0.283 | 0.725 | 0.217 | -1.268 | 0.205 | 0.403 | 1.304 |
| VSX1    | -0.043 | 0.299 | -0.145 | 0.885 | 0.958 | 0.286 | -0.148 | 0.882 | 0.533 | 1.72  |
| VSTM4   | -0.218 | 0.296 | -0.738 | 0.46  | 0.804 | 0.238 | -0.825 | 0.409 | 0.45  | 1.435 |
| VSNL1   | -0.013 | 0.295 | -0.045 | 0.964 | 0.987 | 0.291 | -0.045 | 0.964 | 0.553 | 1.76  |
| VSIG4   | 0.063  | 0.295 | 0.212  | 0.832 | 1.065 | 0.314 | 0.205  | 0.837 | 0.597 | 1.899 |
| VRTN    | 0.089  | 0.296 | 0.301  | 0.763 | 1.093 | 0.324 | 0.288  | 0.773 | 0.612 | 1.953 |
| VRK3    | -0.414 | 0.3   | -1.381 | 0.167 | 0.661 | 0.198 | -1.711 | 0.087 | 0.367 | 1.189 |
| VRK2    | 0.951  | 0.316 | 3.012  | 0.003 | 2.588 | 0.817 | 1.943  | 0.052 | 1.394 | 4.806 |
| VRK1    | 0.408  | 0.298 | 1.369  | 0.171 | 1.503 | 0.448 | 1.125  | 0.261 | 0.839 | 2.694 |
| VPS9D1  | 0.406  | 0.298 | 1.365  | 0.172 | 1.501 | 0.447 | 1.121  | 0.262 | 0.838 | 2.691 |
| VPS8    | -0.103 | 0.295 | -0.35  | 0.726 | 0.902 | 0.266 | -0.369 | 0.712 | 0.505 | 1.609 |
| VPS72   | 0.713  | 0.307 | 2.326  | 0.02  | 2.04  | 0.625 | 1.663  | 0.096 | 1.119 | 3.72  |
| VPS54   | -0.212 | 0.296 | -0.715 | 0.475 | 0.809 | 0.24  | -0.796 | 0.426 | 0.453 | 1.446 |
| VPS53   | 0.243  | 0.298 | 0.815  | 0.415 | 1.275 | 0.379 | 0.724  | 0.469 | 0.711 | 2.284 |
| VPS52   | 0.101  | 0.297 | 0.341  | 0.733 | 1.106 | 0.328 | 0.324  | 0.746 | 0.619 | 1.979 |
| VPS51   | -0.012 | 0.296 | -0.041 | 0.967 | 0.988 | 0.292 | -0.042 | 0.967 | 0.553 | 1.764 |
| VPS50   | -0.457 | 0.3   | -1.523 | 0.128 | 0.633 | 0.19  | -1.93  | 0.054 | 0.352 | 1.14  |
| VPS4B   | -0.536 | 0.303 | -1.768 | 0.077 | 0.585 | 0.177 | -2.339 | 0.019 | 0.323 | 1.06  |

|         |        |       |        |       |       |       |        |       |       |       |
|---------|--------|-------|--------|-------|-------|-------|--------|-------|-------|-------|
| VPS4A   | 0.46   | 0.3   | 1.534  | 0.125 | 1.583 | 0.474 | 1.23   | 0.219 | 0.88  | 2.848 |
| VPS45   | -0.103 | 0.299 | -0.343 | 0.732 | 0.903 | 0.27  | -0.361 | 0.718 | 0.502 | 1.622 |
| VPS41   | 0.402  | 0.3   | 1.341  | 0.18  | 1.495 | 0.448 | 1.105  | 0.269 | 0.831 | 2.688 |
| VPS39   | -1.099 | 0.336 | -3.271 | 0.001 | 0.333 | 0.112 | -5.955 | 0     | 0.173 | 0.644 |
| VPS37C  | -0.056 | 0.295 | -0.189 | 0.85  | 0.946 | 0.279 | -0.194 | 0.846 | 0.53  | 1.687 |
| VPS37B  | -0.173 | 0.296 | -0.584 | 0.559 | 0.841 | 0.249 | -0.637 | 0.524 | 0.471 | 1.502 |
| VPS35L  | -0.319 | 0.298 | -1.072 | 0.284 | 0.727 | 0.216 | -1.263 | 0.207 | 0.405 | 1.303 |
| VPS35   | 0.938  | 0.321 | 2.925  | 0.003 | 2.554 | 0.819 | 1.898  | 0.058 | 1.363 | 4.787 |
| VPS33B  | 0.507  | 0.303 | 1.675  | 0.094 | 1.66  | 0.503 | 1.314  | 0.189 | 0.917 | 3.006 |
| VPS33A  | 0.058  | 0.296 | 0.196  | 0.844 | 1.06  | 0.313 | 0.191  | 0.849 | 0.594 | 1.891 |
| VPS28   | 0.06   | 0.296 | 0.204  | 0.839 | 1.062 | 0.314 | 0.198  | 0.843 | 0.595 | 1.896 |
| VPS26C  | 0.278  | 0.297 | 0.935  | 0.35  | 1.32  | 0.392 | 0.816  | 0.414 | 0.737 | 2.363 |
| VPS26A  | -0.119 | 0.296 | -0.401 | 0.688 | 0.888 | 0.263 | -0.426 | 0.67  | 0.497 | 1.587 |
| VPS16   | 0.066  | 0.295 | 0.224  | 0.823 | 1.068 | 0.316 | 0.217  | 0.828 | 0.599 | 1.907 |
| VPS13D  | -0.069 | 0.295 | -0.232 | 0.817 | 0.934 | 0.276 | -0.24  | 0.81  | 0.523 | 1.666 |
| VPS13C  | -0.992 | 0.318 | -3.119 | 0.002 | 0.371 | 0.118 | -5.335 | 0     | 0.199 | 0.692 |
| VPS13B  | -0.162 | 0.296 | -0.547 | 0.584 | 0.85  | 0.252 | -0.594 | 0.553 | 0.476 | 1.52  |
| VPS13A  | -0.419 | 0.301 | -1.394 | 0.163 | 0.657 | 0.198 | -1.732 | 0.083 | 0.365 | 1.186 |
| VPS11   | 0.064  | 0.295 | 0.215  | 0.83  | 1.066 | 0.315 | 0.209  | 0.835 | 0.597 | 1.902 |
| VPREB3  | 0.073  | 0.297 | 0.246  | 0.806 | 1.076 | 0.319 | 0.237  | 0.813 | 0.601 | 1.924 |
| VPREB1  | 0.081  | 0.295 | 0.275  | 0.784 | 1.084 | 0.32  | 0.264  | 0.792 | 0.608 | 1.935 |
| VOPP1   | 0.159  | 0.296 | 0.537  | 0.591 | 1.172 | 0.347 | 0.497  | 0.619 | 0.657 | 2.092 |
| VNN3    | -0.403 | 0.3   | -1.344 | 0.179 | 0.669 | 0.2   | -1.654 | 0.098 | 0.372 | 1.203 |
| VNN2    | -0.524 | 0.302 | -1.733 | 0.083 | 0.592 | 0.179 | -2.278 | 0.023 | 0.327 | 1.071 |
| VNN1    | -0.05  | 0.296 | -0.168 | 0.866 | 0.951 | 0.282 | -0.173 | 0.863 | 0.532 | 1.7   |
| VN1R1   | -0.03  | 0.296 | -0.102 | 0.919 | 0.97  | 0.287 | -0.103 | 0.918 | 0.543 | 1.733 |
| VLDLR   | -0.089 | 0.297 | -0.301 | 0.764 | 0.915 | 0.271 | -0.314 | 0.753 | 0.512 | 1.636 |
| VKORC1  | -0.237 | 0.298 | -0.795 | 0.427 | 0.789 | 0.235 | -0.897 | 0.37  | 0.44  | 1.415 |
| VIPR2   | -0.324 | 0.3   | -1.079 | 0.28  | 0.723 | 0.217 | -1.274 | 0.203 | 0.402 | 1.302 |
| VIPR1   | -0.403 | 0.299 | -1.346 | 0.178 | 0.669 | 0.2   | -1.657 | 0.097 | 0.372 | 1.202 |
| VIPAS39 | 0.142  | 0.296 | 0.478  | 0.632 | 1.152 | 0.341 | 0.446  | 0.656 | 0.645 | 2.058 |
| VIP     | 0.338  | 0.298 | 1.134  | 0.257 | 1.402 | 0.418 | 0.962  | 0.336 | 0.782 | 2.514 |
| VIM     | -0.231 | 0.296 | -0.78  | 0.435 | 0.794 | 0.235 | -0.878 | 0.38  | 0.444 | 1.418 |
| VILL    | -0.763 | 0.315 | -2.423 | 0.015 | 0.466 | 0.147 | -3.635 | 0     | 0.251 | 0.864 |
| VIL1    | 0.869  | 0.315 | 2.756  | 0.006 | 2.383 | 0.751 | 1.842  | 0.065 | 1.285 | 4.42  |
| VHL     | 0.343  | 0.297 | 1.154  | 0.249 | 1.409 | 0.419 | 0.977  | 0.329 | 0.787 | 2.522 |
| VGLL4   | -0.315 | 0.297 | -1.062 | 0.288 | 0.73  | 0.217 | -1.249 | 0.212 | 0.408 | 1.305 |
| VGLL3   | -0.61  | 0.303 | -2.011 | 0.044 | 0.543 | 0.165 | -2.771 | 0.006 | 0.3   | 0.985 |



|           |        |       |        |       |       |       |        |       |       |       |
|-----------|--------|-------|--------|-------|-------|-------|--------|-------|-------|-------|
| VGLL1     | 0.41   | 0.3   | 1.368  | 0.171 | 1.506 | 0.451 | 1.122  | 0.262 | 0.837 | 2.709 |
| VGFB      | 0.131  | 0.297 | 0.442  | 0.659 | 1.14  | 0.338 | 0.414  | 0.679 | 0.638 | 2.038 |
| VEZT      | -0.625 | 0.306 | -2.043 | 0.041 | 0.535 | 0.164 | -2.838 | 0.005 | 0.294 | 0.975 |
| VEZF1     | 0.197  | 0.296 | 0.665  | 0.506 | 1.218 | 0.361 | 0.604  | 0.546 | 0.681 | 2.177 |
| VENTXP1   | 0.159  | 0.295 | 0.538  | 0.591 | 1.172 | 0.346 | 0.497  | 0.619 | 0.657 | 2.091 |
| VENTX     | 0.116  | 0.296 | 0.392  | 0.695 | 1.123 | 0.333 | 0.371  | 0.711 | 0.628 | 2.009 |
| VEGFC     | -0.378 | 0.3   | -1.261 | 0.207 | 0.685 | 0.206 | -1.533 | 0.125 | 0.38  | 1.233 |
| VEGFB     | 0.144  | 0.296 | 0.486  | 0.627 | 1.155 | 0.342 | 0.453  | 0.651 | 0.646 | 2.065 |
| VEGFA     | 0.318  | 0.298 | 1.068  | 0.286 | 1.374 | 0.409 | 0.915  | 0.36  | 0.767 | 2.463 |
| VDR       | 0.308  | 0.296 | 1.04   | 0.298 | 1.361 | 0.403 | 0.895  | 0.371 | 0.761 | 2.433 |
| VDAC3     | 0.993  | 0.321 | 3.094  | 0.002 | 2.699 | 0.866 | 1.962  | 0.05  | 1.439 | 5.062 |
| VDAC2     | 0.127  | 0.295 | 0.429  | 0.668 | 1.135 | 0.335 | 0.403  | 0.687 | 0.636 | 2.024 |
| VDAC1     | -0.548 | 0.303 | -1.809 | 0.07  | 0.578 | 0.175 | -2.409 | 0.016 | 0.319 | 1.047 |
| VCX2      | 0.158  | 0.296 | 0.532  | 0.595 | 1.171 | 0.347 | 0.492  | 0.623 | 0.655 | 2.093 |
| VCPKMT    | 0.101  | 0.295 | 0.343  | 0.731 | 1.107 | 0.327 | 0.327  | 0.744 | 0.62  | 1.974 |
| VCPIP1    | -0.076 | 0.296 | -0.256 | 0.798 | 0.927 | 0.274 | -0.266 | 0.79  | 0.519 | 1.655 |
| VCP       | 0.073  | 0.295 | 0.248  | 0.804 | 1.076 | 0.318 | 0.239  | 0.811 | 0.603 | 1.919 |
| VCL       | 0.423  | 0.303 | 1.399  | 0.162 | 1.527 | 0.462 | 1.14   | 0.254 | 0.844 | 2.763 |
| VCAN      | -0.496 | 0.3   | -1.656 | 0.098 | 0.609 | 0.182 | -2.144 | 0.032 | 0.338 | 1.095 |
| VCAM1     | -0.395 | 0.298 | -1.324 | 0.186 | 0.674 | 0.201 | -1.623 | 0.105 | 0.376 | 1.209 |
| VBP1      | 0.155  | 0.296 | 0.525  | 0.6   | 1.168 | 0.345 | 0.486  | 0.627 | 0.654 | 2.084 |
| VAX2      | 0.185  | 0.296 | 0.624  | 0.532 | 1.203 | 0.357 | 0.57   | 0.569 | 0.673 | 2.151 |
| VAV3      | -0.303 | 0.3   | -1.012 | 0.311 | 0.738 | 0.221 | -1.183 | 0.237 | 0.41  | 1.329 |
| VAV2      | -0.014 | 0.296 | -0.047 | 0.962 | 0.986 | 0.292 | -0.048 | 0.962 | 0.552 | 1.76  |
| VAV1      | -0.418 | 0.3   | -1.393 | 0.164 | 0.659 | 0.198 | -1.729 | 0.084 | 0.366 | 1.186 |
| VAT1      | 0.268  | 0.3   | 0.891  | 0.373 | 1.307 | 0.392 | 0.782  | 0.434 | 0.725 | 2.354 |
| VASP      | -0.142 | 0.297 | -0.478 | 0.632 | 0.868 | 0.257 | -0.514 | 0.607 | 0.485 | 1.552 |
| VASH2     | 0.373  | 0.298 | 1.253  | 0.21  | 1.452 | 0.432 | 1.046  | 0.295 | 0.81  | 2.601 |
| VASH1-AS1 | -0.158 | 0.296 | -0.533 | 0.594 | 0.854 | 0.253 | -0.577 | 0.564 | 0.479 | 1.525 |
| VASH1     | 0.057  | 0.295 | 0.194  | 0.846 | 1.059 | 0.312 | 0.189  | 0.85  | 0.594 | 1.888 |
| VARS1     | 0.149  | 0.296 | 0.504  | 0.614 | 1.161 | 0.344 | 0.468  | 0.639 | 0.65  | 2.076 |
| VAPB      | 0.665  | 0.31  | 2.144  | 0.032 | 1.944 | 0.602 | 1.567  | 0.117 | 1.059 | 3.568 |
| VAPA      | 0.142  | 0.296 | 0.482  | 0.63  | 1.153 | 0.341 | 0.449  | 0.653 | 0.646 | 2.058 |
| VANGL1    | 0.067  | 0.297 | 0.225  | 0.822 | 1.069 | 0.317 | 0.217  | 0.828 | 0.598 | 1.912 |
| VAMP8     | -0.117 | 0.295 | -0.395 | 0.693 | 0.89  | 0.263 | -0.419 | 0.675 | 0.499 | 1.587 |
| VAMP7     | 0.583  | 0.302 | 1.928  | 0.054 | 1.791 | 0.541 | 1.461  | 0.144 | 0.99  | 3.239 |
| VAMP5     | -0.28  | 0.297 | -0.945 | 0.345 | 0.755 | 0.224 | -1.091 | 0.275 | 0.422 | 1.351 |
| VAMP4     | -0.231 | 0.3   | -0.772 | 0.44  | 0.793 | 0.238 | -0.868 | 0.385 | 0.441 | 1.428 |

|         |        |       |        |       |       |       |        |       |       |       |
|---------|--------|-------|--------|-------|-------|-------|--------|-------|-------|-------|
| VAMP3   | -0.456 | 0.307 | -1.487 | 0.137 | 0.634 | 0.194 | -1.884 | 0.06  | 0.347 | 1.156 |
| VAMP2   | -0.246 | 0.298 | -0.824 | 0.41  | 0.782 | 0.233 | -0.934 | 0.35  | 0.436 | 1.402 |
| VAMP1   | -0.568 | 0.303 | -1.877 | 0.061 | 0.567 | 0.171 | -2.527 | 0.011 | 0.313 | 1.025 |
| VAC14   | 0.201  | 0.296 | 0.679  | 0.497 | 1.223 | 0.363 | 0.615  | 0.539 | 0.684 | 2.186 |
| UXT     | -0.213 | 0.298 | -0.717 | 0.474 | 0.808 | 0.241 | -0.799 | 0.424 | 0.451 | 1.448 |
| UXS1    | 0.025  | 0.296 | 0.085  | 0.933 | 1.025 | 0.303 | 0.084  | 0.933 | 0.574 | 1.831 |
| UVRAG   | -0.054 | 0.296 | -0.183 | 0.855 | 0.947 | 0.281 | -0.188 | 0.851 | 0.53  | 1.693 |
| UTY     | 0.222  | 0.296 | 0.749  | 0.454 | 1.248 | 0.369 | 0.672  | 0.502 | 0.699 | 2.228 |
| UTS2    | -0.681 | 0.306 | -2.226 | 0.026 | 0.506 | 0.155 | -3.19  | 0.001 | 0.278 | 0.922 |
| UTRN    | -0.459 | 0.3   | -1.532 | 0.126 | 0.632 | 0.189 | -1.944 | 0.052 | 0.351 | 1.137 |
| UTP6    | 0.043  | 0.296 | 0.145  | 0.885 | 1.044 | 0.309 | 0.142  | 0.887 | 0.584 | 1.865 |
| UTP3    | 0.438  | 0.299 | 1.465  | 0.143 | 1.549 | 0.463 | 1.187  | 0.235 | 0.863 | 2.783 |
| UTP25   | 0.615  | 0.306 | 2.009  | 0.045 | 1.85  | 0.566 | 1.501  | 0.133 | 1.015 | 3.371 |
| UTP20   | 0.059  | 0.296 | 0.2    | 0.841 | 1.061 | 0.314 | 0.194  | 0.846 | 0.594 | 1.896 |
| UTP18   | 0.341  | 0.298 | 1.145  | 0.252 | 1.406 | 0.418 | 0.97   | 0.332 | 0.785 | 2.519 |
| UTP14A  | 0.447  | 0.3   | 1.49   | 0.136 | 1.563 | 0.469 | 1.202  | 0.229 | 0.869 | 2.813 |
| UTP11   | 0.228  | 0.296 | 0.768  | 0.442 | 1.256 | 0.372 | 0.687  | 0.492 | 0.703 | 2.244 |
| UTF1    | -0.01  | 0.296 | -0.032 | 0.974 | 0.991 | 0.293 | -0.032 | 0.974 | 0.555 | 1.768 |
| UST     | -0.038 | 0.298 | -0.128 | 0.898 | 0.962 | 0.287 | -0.131 | 0.896 | 0.537 | 1.726 |
| USPL1   | 0.497  | 0.303 | 1.638  | 0.101 | 1.644 | 0.499 | 1.291  | 0.197 | 0.907 | 2.98  |
| USP9Y   | -0.235 | 0.297 | -0.793 | 0.428 | 0.79  | 0.234 | -0.894 | 0.371 | 0.442 | 1.413 |
| USP9X   | -0.034 | 0.295 | -0.116 | 0.908 | 0.966 | 0.285 | -0.118 | 0.906 | 0.542 | 1.724 |
| USP8    | -0.309 | 0.3   | -1.029 | 0.303 | 0.734 | 0.22  | -1.206 | 0.228 | 0.408 | 1.322 |
| USP7    | -0.09  | 0.297 | -0.303 | 0.762 | 0.914 | 0.272 | -0.317 | 0.752 | 0.51  | 1.637 |
| USP6NL  | 0.932  | 0.316 | 2.951  | 0.003 | 2.54  | 0.803 | 1.919  | 0.055 | 1.368 | 4.719 |
| USP53   | -0.277 | 0.298 | -0.929 | 0.353 | 0.758 | 0.226 | -1.071 | 0.284 | 0.423 | 1.359 |
| USP5    | 0.369  | 0.3   | 1.232  | 0.218 | 1.447 | 0.434 | 1.03   | 0.303 | 0.804 | 2.604 |
| USP49   | -0.279 | 0.3   | -0.93  | 0.352 | 0.756 | 0.227 | -1.073 | 0.283 | 0.42  | 1.362 |
| USP48   | -0.231 | 0.299 | -0.775 | 0.438 | 0.793 | 0.237 | -0.873 | 0.383 | 0.442 | 1.424 |
| USP47   | 0.179  | 0.295 | 0.605  | 0.545 | 1.196 | 0.353 | 0.554  | 0.58  | 0.67  | 2.133 |
| USP46   | 0.017  | 0.295 | 0.056  | 0.955 | 1.017 | 0.3   | 0.056  | 0.955 | 0.57  | 1.814 |
| USP4    | -0.046 | 0.295 | -0.156 | 0.876 | 0.955 | 0.282 | -0.16  | 0.873 | 0.536 | 1.702 |
| USP39   | 0.408  | 0.3   | 1.36   | 0.174 | 1.503 | 0.451 | 1.117  | 0.264 | 0.835 | 2.705 |
| USP36   | 0.391  | 0.298 | 1.314  | 0.189 | 1.479 | 0.44  | 1.088  | 0.277 | 0.825 | 2.651 |
| USP34   | 0.098  | 0.297 | 0.329  | 0.742 | 1.102 | 0.327 | 0.313  | 0.754 | 0.616 | 1.972 |
| USP33   | -0.294 | 0.3   | -0.981 | 0.326 | 0.745 | 0.223 | -1.141 | 0.254 | 0.414 | 1.341 |
| USP32P2 | 0.069  | 0.295 | 0.232  | 0.816 | 1.071 | 0.316 | 0.224  | 0.823 | 0.6   | 1.911 |
| USP32   | 0.174  | 0.296 | 0.59   | 0.555 | 1.191 | 0.352 | 0.542  | 0.588 | 0.667 | 2.125 |

|         |        |       |        |       |       |       |        |       |       |       |
|---------|--------|-------|--------|-------|-------|-------|--------|-------|-------|-------|
| USP3    | 0.071  | 0.295 | 0.241  | 0.81  | 1.074 | 0.317 | 0.232  | 0.816 | 0.602 | 1.914 |
| USP29   | 0.28   | 0.301 | 0.932  | 0.351 | 1.324 | 0.398 | 0.813  | 0.416 | 0.734 | 2.387 |
| USP27X  | 0.005  | 0.295 | 0.018  | 0.985 | 1.005 | 0.297 | 0.018  | 0.985 | 0.564 | 1.793 |
| USP25   | 0.212  | 0.296 | 0.716  | 0.474 | 1.236 | 0.366 | 0.645  | 0.519 | 0.692 | 2.21  |
| USP24   | -0.029 | 0.295 | -0.099 | 0.921 | 0.971 | 0.287 | -0.1   | 0.92  | 0.544 | 1.733 |
| USP22   | -0.195 | 0.297 | -0.655 | 0.513 | 0.823 | 0.245 | -0.723 | 0.47  | 0.46  | 1.474 |
| USP21   | -0.207 | 0.298 | -0.695 | 0.487 | 0.813 | 0.242 | -0.772 | 0.44  | 0.453 | 1.459 |
| USP20   | -0.107 | 0.295 | -0.362 | 0.717 | 0.899 | 0.265 | -0.382 | 0.702 | 0.504 | 1.603 |
| USP2    | -0.234 | 0.297 | -0.788 | 0.431 | 0.791 | 0.235 | -0.888 | 0.375 | 0.442 | 1.416 |
| USP19   | -0.009 | 0.296 | -0.03  | 0.976 | 0.991 | 0.293 | -0.03  | 0.976 | 0.555 | 1.769 |
| USP18   | -0.04  | 0.295 | -0.137 | 0.891 | 0.96  | 0.284 | -0.139 | 0.889 | 0.538 | 1.713 |
| USP16   | -0.113 | 0.3   | -0.376 | 0.707 | 0.893 | 0.268 | -0.398 | 0.69  | 0.496 | 1.609 |
| USP14   | 0.616  | 0.303 | 2.029  | 0.042 | 1.851 | 0.562 | 1.515  | 0.13  | 1.021 | 3.356 |
| USP13   | 0.487  | 0.3   | 1.627  | 0.104 | 1.628 | 0.488 | 1.287  | 0.198 | 0.905 | 2.929 |
| USP12   | 1.048  | 0.322 | 3.25   | 0.001 | 2.851 | 0.919 | 2.014  | 0.044 | 1.516 | 5.364 |
| USP11   | 0.257  | 0.298 | 0.862  | 0.389 | 1.293 | 0.385 | 0.761  | 0.447 | 0.721 | 2.316 |
| USP10   | 0.957  | 0.315 | 3.036  | 0.002 | 2.605 | 0.822 | 1.954  | 0.051 | 1.404 | 4.834 |
| USP1    | 0.406  | 0.298 | 1.361  | 0.174 | 1.5   | 0.447 | 1.119  | 0.263 | 0.836 | 2.691 |
| USO1    | -0.422 | 0.3   | -1.406 | 0.16  | 0.656 | 0.197 | -1.749 | 0.08  | 0.364 | 1.181 |
| USH2A   | 0.032  | 0.295 | 0.11   | 0.913 | 1.033 | 0.305 | 0.108  | 0.914 | 0.579 | 1.842 |
| USH1C   | 0.835  | 0.315 | 2.652  | 0.008 | 2.304 | 0.726 | 1.798  | 0.072 | 1.243 | 4.271 |
| USF2    | -0.314 | 0.3   | -1.046 | 0.295 | 0.731 | 0.219 | -1.229 | 0.219 | 0.406 | 1.315 |
| USE1    | 0.08   | 0.295 | 0.27   | 0.787 | 1.083 | 0.32  | 0.259  | 0.795 | 0.607 | 1.931 |
| USB1    | 0.354  | 0.298 | 1.19   | 0.234 | 1.425 | 0.424 | 1.002  | 0.316 | 0.795 | 2.553 |
| UROS    | -0.589 | 0.31  | -1.899 | 0.058 | 0.555 | 0.172 | -2.586 | 0.01  | 0.302 | 1.019 |
| UROD    | 0.033  | 0.297 | 0.111  | 0.912 | 1.033 | 0.307 | 0.109  | 0.913 | 0.578 | 1.848 |
| URM1    | 0.355  | 0.3   | 1.183  | 0.237 | 1.427 | 0.429 | 0.996  | 0.319 | 0.792 | 2.57  |
| URI1    | 0.382  | 0.3   | 1.275  | 0.202 | 1.465 | 0.439 | 1.06   | 0.289 | 0.814 | 2.637 |
| URGCP   | -0.013 | 0.297 | -0.044 | 0.965 | 0.987 | 0.293 | -0.045 | 0.964 | 0.551 | 1.767 |
| URB2    | 0.607  | 0.303 | 2.004  | 0.045 | 1.835 | 0.556 | 1.502  | 0.133 | 1.013 | 3.322 |
| URB1    | -0.147 | 0.296 | -0.495 | 0.62  | 0.864 | 0.255 | -0.534 | 0.594 | 0.484 | 1.542 |
| UQCRO   | -0.053 | 0.295 | -0.18  | 0.857 | 0.948 | 0.28  | -0.185 | 0.853 | 0.532 | 1.691 |
| UQCRFS1 | 0.284  | 0.296 | 0.959  | 0.338 | 1.329 | 0.394 | 0.835  | 0.404 | 0.743 | 2.375 |
| UQCRC2  | 0.329  | 0.298 | 1.103  | 0.27  | 1.39  | 0.415 | 0.94   | 0.347 | 0.774 | 2.495 |
| UQCRC1  | 0.035  | 0.297 | 0.119  | 0.905 | 1.036 | 0.307 | 0.117  | 0.907 | 0.579 | 1.853 |
| UQCRB   | 0.064  | 0.296 | 0.216  | 0.829 | 1.066 | 0.315 | 0.209  | 0.835 | 0.597 | 1.903 |
| UQCR11  | 0.303  | 0.298 | 1.015  | 0.31  | 1.354 | 0.404 | 0.876  | 0.381 | 0.754 | 2.429 |
| UQCR10  | 0.234  | 0.296 | 0.789  | 0.43  | 1.263 | 0.374 | 0.704  | 0.481 | 0.707 | 2.258 |

|           |        |       |        |       |       |       |        |       |       |       |
|-----------|--------|-------|--------|-------|-------|-------|--------|-------|-------|-------|
| UQCC1     | -0.018 | 0.295 | -0.059 | 0.953 | 0.983 | 0.29  | -0.06  | 0.952 | 0.551 | 1.753 |
| UPP1      | 0.422  | 0.298 | 1.416  | 0.157 | 1.525 | 0.455 | 1.155  | 0.248 | 0.85  | 2.736 |
| UPK3A     | 0.249  | 0.298 | 0.837  | 0.402 | 1.283 | 0.382 | 0.741  | 0.459 | 0.716 | 2.299 |
| UPK2      | 0.184  | 0.296 | 0.622  | 0.534 | 1.202 | 0.356 | 0.568  | 0.57  | 0.673 | 2.149 |
| UPK1B     | 0.523  | 0.302 | 1.73   | 0.084 | 1.687 | 0.51  | 1.347  | 0.178 | 0.933 | 3.052 |
| UPK1A     | -0.569 | 0.302 | -1.881 | 0.06  | 0.566 | 0.171 | -2.534 | 0.011 | 0.313 | 1.024 |
| UPF3B     | 0.484  | 0.306 | 1.58   | 0.114 | 1.623 | 0.497 | 1.252  | 0.211 | 0.89  | 2.959 |
| UPF3A     | -0.277 | 0.298 | -0.931 | 0.352 | 0.758 | 0.226 | -1.073 | 0.283 | 0.423 | 1.358 |
| UPF2      | 0.443  | 0.303 | 1.465  | 0.143 | 1.558 | 0.472 | 1.183  | 0.237 | 0.861 | 2.82  |
| UPF1      | 0.732  | 0.306 | 2.39   | 0.017 | 2.08  | 0.637 | 1.695  | 0.09  | 1.141 | 3.791 |
| UPB1      | 0.16   | 0.296 | 0.541  | 0.589 | 1.174 | 0.348 | 0.5    | 0.617 | 0.657 | 2.097 |
| UNKL      | 0.465  | 0.3   | 1.549  | 0.121 | 1.592 | 0.478 | 1.239  | 0.216 | 0.884 | 2.868 |
| UNG       | 0.117  | 0.295 | 0.396  | 0.692 | 1.124 | 0.332 | 0.373  | 0.709 | 0.63  | 2.005 |
| UNC93B1   | 0.104  | 0.295 | 0.353  | 0.724 | 1.11  | 0.328 | 0.335  | 0.738 | 0.622 | 1.98  |
| UNC93A    | -0.063 | 0.295 | -0.213 | 0.832 | 0.939 | 0.277 | -0.219 | 0.826 | 0.527 | 1.675 |
| UNC5C     | -0.08  | 0.297 | -0.268 | 0.789 | 0.924 | 0.274 | -0.279 | 0.78  | 0.516 | 1.652 |
| UNC5B     | -0.436 | 0.3   | -1.452 | 0.146 | 0.647 | 0.194 | -1.82  | 0.069 | 0.359 | 1.165 |
| UNC50     | -0.003 | 0.295 | -0.009 | 0.993 | 0.997 | 0.294 | -0.009 | 0.993 | 0.56  | 1.778 |
| UNC45A    | 1.16   | 0.328 | 3.533  | 0     | 3.19  | 1.047 | 2.091  | 0.037 | 1.676 | 6.07  |
| UNC13B    | 0      | 0.295 | 0.001  | 0.999 | 1     | 0.295 | 0.001  | 0.999 | 0.561 | 1.784 |
| UNC13A    | -0.211 | 0.298 | -0.709 | 0.478 | 0.81  | 0.241 | -0.789 | 0.43  | 0.452 | 1.451 |
| UNC119B   | -0.534 | 0.303 | -1.76  | 0.078 | 0.586 | 0.178 | -2.326 | 0.02  | 0.323 | 1.063 |
| UNC119    | 0.005  | 0.298 | 0.018  | 0.986 | 1.005 | 0.3   | 0.018  | 0.986 | 0.56  | 1.804 |
| UMPS      | 0.54   | 0.306 | 1.764  | 0.078 | 1.716 | 0.525 | 1.363  | 0.173 | 0.942 | 3.125 |
| UMOD      | 0.253  | 0.298 | 0.849  | 0.396 | 1.288 | 0.383 | 0.75   | 0.453 | 0.718 | 2.308 |
| ULK4      | -0.672 | 0.305 | -2.205 | 0.027 | 0.511 | 0.156 | -3.144 | 0.002 | 0.281 | 0.928 |
| ULK2      | -0.035 | 0.295 | -0.118 | 0.906 | 0.966 | 0.285 | -0.12  | 0.905 | 0.541 | 1.723 |
| ULK1      | -0.896 | 0.316 | -2.837 | 0.005 | 0.408 | 0.129 | -4.59  | 0     | 0.22  | 0.758 |
| ULBP2     | 0.397  | 0.3   | 1.322  | 0.186 | 1.487 | 0.446 | 1.091  | 0.275 | 0.826 | 2.676 |
| ULBP1     | 0.058  | 0.295 | 0.195  | 0.845 | 1.059 | 0.313 | 0.19   | 0.85  | 0.594 | 1.889 |
| UIMC1     | 0.272  | 0.298 | 0.915  | 0.36  | 1.313 | 0.391 | 0.801  | 0.423 | 0.733 | 2.352 |
| UHRF1BP1L | -0.382 | 0.307 | -1.246 | 0.213 | 0.682 | 0.209 | -1.517 | 0.129 | 0.374 | 1.245 |
| UGT8      | 0.168  | 0.298 | 0.565  | 0.572 | 1.183 | 0.352 | 0.52   | 0.603 | 0.66  | 2.121 |
| UGT2B4    | 0.308  | 0.297 | 1.035  | 0.301 | 1.36  | 0.404 | 0.891  | 0.373 | 0.76  | 2.435 |
| UGT2B28   | 0.143  | 0.297 | 0.482  | 0.63  | 1.154 | 0.343 | 0.449  | 0.653 | 0.645 | 2.065 |
| UGT2B17   | 0.541  | 0.306 | 1.77   | 0.077 | 1.718 | 0.525 | 1.367  | 0.172 | 0.944 | 3.129 |
| UGT2B15   | 0.02   | 0.298 | 0.066  | 0.947 | 1.02  | 0.304 | 0.066  | 0.948 | 0.569 | 1.828 |
| UGT2A3    | 0.042  | 0.295 | 0.142  | 0.887 | 1.043 | 0.308 | 0.14   | 0.889 | 0.585 | 1.859 |

|        |        |       |        |       |       |       |        |       |       |       |
|--------|--------|-------|--------|-------|-------|-------|--------|-------|-------|-------|
| UGP2   | 0.101  | 0.295 | 0.341  | 0.733 | 1.106 | 0.327 | 0.325  | 0.745 | 0.62  | 1.973 |
| UGGT2  | 0.237  | 0.297 | 0.799  | 0.424 | 1.267 | 0.376 | 0.712  | 0.477 | 0.709 | 2.266 |
| UGGT1  | 0.581  | 0.306 | 1.899  | 0.058 | 1.787 | 0.546 | 1.441  | 0.15  | 0.982 | 3.254 |
| UGDH   | -0.519 | 0.3   | -1.729 | 0.084 | 0.595 | 0.179 | -2.266 | 0.023 | 0.331 | 1.072 |
| UGCG   | -0.354 | 0.3   | -1.183 | 0.237 | 0.702 | 0.21  | -1.42  | 0.156 | 0.39  | 1.262 |
| UFSP2  | -0.001 | 0.296 | -0.003 | 0.997 | 0.999 | 0.295 | -0.003 | 0.997 | 0.56  | 1.784 |
| UFM1   | 0.432  | 0.302 | 1.427  | 0.153 | 1.54  | 0.465 | 1.159  | 0.246 | 0.851 | 2.784 |
| UFL1   | -0.115 | 0.295 | -0.39  | 0.696 | 0.891 | 0.263 | -0.414 | 0.679 | 0.5   | 1.59  |
| UFD1   | -0.205 | 0.296 | -0.69  | 0.49  | 0.815 | 0.242 | -0.766 | 0.444 | 0.456 | 1.457 |
| UFC1   | -0.46  | 0.302 | -1.522 | 0.128 | 0.631 | 0.191 | -1.933 | 0.053 | 0.349 | 1.142 |
| UEVLD  | 0.005  | 0.299 | 0.015  | 0.988 | 1.005 | 0.3   | 0.015  | 0.988 | 0.559 | 1.805 |
| UCP3   | 0.356  | 0.3   | 1.186  | 0.236 | 1.428 | 0.429 | 0.997  | 0.319 | 0.792 | 2.572 |
| UCP2   | -0.057 | 0.295 | -0.192 | 0.848 | 0.945 | 0.279 | -0.197 | 0.844 | 0.53  | 1.686 |
| UCP1   | 0.214  | 0.296 | 0.721  | 0.471 | 1.238 | 0.367 | 0.649  | 0.516 | 0.693 | 2.212 |
| UCN    | 0.293  | 0.298 | 0.984  | 0.325 | 1.341 | 0.399 | 0.853  | 0.393 | 0.748 | 2.403 |
| UCKL1  | 0.604  | 0.306 | 1.975  | 0.048 | 1.829 | 0.559 | 1.483  | 0.138 | 1.005 | 3.329 |
| UHL5   | 0.716  | 0.31  | 2.311  | 0.021 | 2.046 | 0.634 | 1.65   | 0.099 | 1.115 | 3.755 |
| UHL3   | 0.064  | 0.295 | 0.218  | 0.828 | 1.066 | 0.315 | 0.211  | 0.833 | 0.598 | 1.902 |
| UHL1   | 0.061  | 0.295 | 0.205  | 0.837 | 1.063 | 0.314 | 0.199  | 0.842 | 0.596 | 1.895 |
| UBXN8  | -0.02  | 0.296 | -0.067 | 0.947 | 0.98  | 0.29  | -0.067 | 0.946 | 0.549 | 1.752 |
| UBXN7  | -0.096 | 0.297 | -0.322 | 0.748 | 0.909 | 0.27  | -0.338 | 0.736 | 0.507 | 1.628 |
| UBXN4  | 0.821  | 0.315 | 2.609  | 0.009 | 2.273 | 0.715 | 1.779  | 0.075 | 1.227 | 4.212 |
| UBXN2B | 0.414  | 0.3   | 1.38   | 0.168 | 1.512 | 0.453 | 1.13   | 0.258 | 0.84  | 2.721 |
| UBXN1  | -0.37  | 0.298 | -1.239 | 0.215 | 0.691 | 0.206 | -1.499 | 0.134 | 0.385 | 1.24  |
| UBTF   | -0.736 | 0.31  | -2.372 | 0.018 | 0.479 | 0.149 | -3.506 | 0     | 0.261 | 0.88  |
| UBTD1  | 0.115  | 0.295 | 0.391  | 0.696 | 1.122 | 0.332 | 0.369  | 0.712 | 0.629 | 2.003 |
| UBR7   | 0.017  | 0.297 | 0.057  | 0.954 | 1.017 | 0.302 | 0.057  | 0.955 | 0.568 | 1.821 |
| UBR5   | -0.569 | 0.303 | -1.877 | 0.06  | 0.566 | 0.172 | -2.529 | 0.011 | 0.313 | 1.025 |
| UBR4   | -0.145 | 0.296 | -0.49  | 0.624 | 0.865 | 0.256 | -0.528 | 0.598 | 0.485 | 1.544 |
| UBR2   | -0.061 | 0.296 | -0.207 | 0.836 | 0.941 | 0.278 | -0.213 | 0.831 | 0.527 | 1.679 |
| UBQLN4 | 0.235  | 0.298 | 0.788  | 0.431 | 1.265 | 0.377 | 0.702  | 0.482 | 0.705 | 2.267 |
| UBQLN3 | 0.398  | 0.299 | 1.332  | 0.183 | 1.488 | 0.444 | 1.099  | 0.272 | 0.829 | 2.672 |
| UBQLN2 | -0.519 | 0.306 | -1.695 | 0.09  | 0.595 | 0.182 | -2.222 | 0.026 | 0.327 | 1.084 |
| UBP1   | -0.039 | 0.295 | -0.133 | 0.894 | 0.961 | 0.284 | -0.136 | 0.892 | 0.539 | 1.714 |
| UBOX5  | 0.003  | 0.296 | 0.009  | 0.993 | 1.003 | 0.297 | 0.009  | 0.993 | 0.562 | 1.79  |
| UBN1   | 0.027  | 0.296 | 0.09   | 0.928 | 1.027 | 0.304 | 0.089  | 0.929 | 0.575 | 1.834 |
| UBL5   | 0.894  | 0.312 | 2.868  | 0.004 | 2.445 | 0.762 | 1.896  | 0.058 | 1.327 | 4.505 |
| UBL4A  | 0.422  | 0.298 | 1.415  | 0.157 | 1.525 | 0.455 | 1.154  | 0.248 | 0.85  | 2.737 |

|         |        |       |        |       |       |       |        |       |       |       |
|---------|--------|-------|--------|-------|-------|-------|--------|-------|-------|-------|
| UBL3    | -0.537 | 0.306 | -1.755 | 0.079 | 0.585 | 0.179 | -2.323 | 0.02  | 0.321 | 1.065 |
| UBIAD1  | 0.056  | 0.297 | 0.188  | 0.851 | 1.058 | 0.314 | 0.183  | 0.855 | 0.591 | 1.892 |
| UBFD1   | 0.68   | 0.31  | 2.192  | 0.028 | 1.974 | 0.613 | 1.59   | 0.112 | 1.075 | 3.627 |
| UBE4B   | -0.044 | 0.296 | -0.148 | 0.882 | 0.957 | 0.283 | -0.152 | 0.879 | 0.536 | 1.709 |
| UBE4A   | -0.509 | 0.303 | -1.683 | 0.092 | 0.601 | 0.182 | -2.194 | 0.028 | 0.332 | 1.088 |
| UBE3C   | 0.098  | 0.296 | 0.332  | 0.74  | 1.103 | 0.327 | 0.316  | 0.752 | 0.617 | 1.971 |
| UBE3B   | -0.629 | 0.304 | -2.073 | 0.038 | 0.533 | 0.162 | -2.886 | 0.004 | 0.294 | 0.966 |
| UBE3A   | -0.966 | 0.328 | -2.95  | 0.003 | 0.381 | 0.125 | -4.971 | 0     | 0.2   | 0.723 |
| UBE2Z   | 0.077  | 0.297 | 0.259  | 0.796 | 1.08  | 0.32  | 0.249  | 0.803 | 0.604 | 1.932 |
| UBE2W   | 0.406  | 0.298 | 1.361  | 0.173 | 1.501 | 0.447 | 1.119  | 0.263 | 0.836 | 2.692 |
| UBE2V2  | 0.7    | 0.306 | 2.291  | 0.022 | 2.014 | 0.616 | 1.647  | 0.1   | 1.106 | 3.667 |
| UBE2S   | 0.541  | 0.3   | 1.802  | 0.072 | 1.718 | 0.516 | 1.391  | 0.164 | 0.954 | 3.095 |
| UBE2Q1  | 0.012  | 0.296 | 0.039  | 0.969 | 1.012 | 0.299 | 0.039  | 0.969 | 0.566 | 1.807 |
| UBE2O   | 0.84   | 0.315 | 2.669  | 0.008 | 2.316 | 0.729 | 1.806  | 0.071 | 1.25  | 4.292 |
| UBE2NL  | 0.072  | 0.295 | 0.244  | 0.808 | 1.075 | 0.317 | 0.235  | 0.814 | 0.603 | 1.916 |
| UBE2N   | 0.191  | 0.296 | 0.646  | 0.518 | 1.211 | 0.358 | 0.588  | 0.556 | 0.678 | 2.162 |
| UBE2M   | 0.072  | 0.296 | 0.245  | 0.807 | 1.075 | 0.318 | 0.236  | 0.813 | 0.602 | 1.92  |
| UBE2L6  | 0.01   | 0.296 | 0.032  | 0.974 | 1.01  | 0.298 | 0.032  | 0.974 | 0.566 | 1.802 |
| UBE2L3  | 0.363  | 0.297 | 1.221  | 0.222 | 1.437 | 0.427 | 1.024  | 0.306 | 0.803 | 2.573 |
| UBE2K   | 0.923  | 0.315 | 2.927  | 0.003 | 2.516 | 0.793 | 1.911  | 0.056 | 1.356 | 4.669 |
| UBE2J1  | -0.561 | 0.301 | -1.861 | 0.063 | 0.571 | 0.172 | -2.495 | 0.013 | 0.316 | 1.03  |
| UBE2I   | 0.157  | 0.295 | 0.532  | 0.594 | 1.17  | 0.346 | 0.493  | 0.622 | 0.656 | 2.088 |
| UBE2H   | -0.5   | 0.302 | -1.654 | 0.098 | 0.607 | 0.183 | -2.147 | 0.032 | 0.335 | 1.097 |
| UBE2G2  | -0.068 | 0.295 | -0.231 | 0.817 | 0.934 | 0.276 | -0.24  | 0.811 | 0.524 | 1.666 |
| UBE2G1  | -0.468 | 0.306 | -1.53  | 0.126 | 0.626 | 0.192 | -1.951 | 0.051 | 0.344 | 1.141 |
| UBE2E3  | -0.112 | 0.296 | -0.378 | 0.706 | 0.894 | 0.265 | -0.399 | 0.69  | 0.501 | 1.597 |
| UBE2E1  | 0.319  | 0.297 | 1.074  | 0.283 | 1.376 | 0.409 | 0.919  | 0.358 | 0.769 | 2.462 |
| UBE2D4  | -0.269 | 0.298 | -0.903 | 0.366 | 0.764 | 0.227 | -1.037 | 0.3   | 0.426 | 1.37  |
| UBE2D3  | 0.026  | 0.296 | 0.086  | 0.931 | 1.026 | 0.304 | 0.085  | 0.932 | 0.574 | 1.834 |
| UBE2D2  | 0.132  | 0.298 | 0.442  | 0.658 | 1.141 | 0.339 | 0.415  | 0.678 | 0.637 | 2.044 |
| UBE2D1  | 0.254  | 0.298 | 0.854  | 0.393 | 1.29  | 0.384 | 0.754  | 0.451 | 0.719 | 2.312 |
| UBE2C   | 0.846  | 0.315 | 2.688  | 0.007 | 2.33  | 0.734 | 1.814  | 0.07  | 1.257 | 4.319 |
| UBE2B   | -0.108 | 0.295 | -0.366 | 0.715 | 0.898 | 0.265 | -0.386 | 0.699 | 0.503 | 1.602 |
| UBE2A   | 0.557  | 0.301 | 1.847  | 0.065 | 1.745 | 0.526 | 1.417  | 0.157 | 0.967 | 3.15  |
| UBC     | 0.003  | 0.295 | 0.01   | 0.992 | 1.003 | 0.296 | 0.01   | 0.992 | 0.563 | 1.788 |
| UBB     | 0.674  | 0.306 | 2.206  | 0.027 | 1.962 | 0.6   | 1.605  | 0.109 | 1.078 | 3.571 |
| UBASH3A | -0.554 | 0.306 | -1.81  | 0.07  | 0.575 | 0.176 | -2.418 | 0.016 | 0.315 | 1.047 |
| UBAP2L  | -0.076 | 0.296 | -0.258 | 0.797 | 0.927 | 0.274 | -0.268 | 0.789 | 0.519 | 1.654 |

|         |        |       |        |       |       |       |        |       |       |       |
|---------|--------|-------|--------|-------|-------|-------|--------|-------|-------|-------|
| UBAP2   | 0.575  | 0.303 | 1.9    | 0.057 | 1.777 | 0.537 | 1.445  | 0.149 | 0.982 | 3.214 |
| UBAP1   | -0.168 | 0.296 | -0.569 | 0.569 | 0.845 | 0.25  | -0.62  | 0.535 | 0.474 | 1.508 |
| UBAC1   | -0.34  | 0.3   | -1.136 | 0.256 | 0.712 | 0.213 | -1.353 | 0.176 | 0.396 | 1.28  |
| UBA6    | -0.126 | 0.297 | -0.425 | 0.671 | 0.881 | 0.262 | -0.453 | 0.65  | 0.492 | 1.578 |
| UBA52   | -0.407 | 0.3   | -1.357 | 0.175 | 0.666 | 0.2   | -1.675 | 0.094 | 0.37  | 1.198 |
| UBA5    | 0.171  | 0.297 | 0.578  | 0.564 | 1.187 | 0.352 | 0.531  | 0.596 | 0.663 | 2.124 |
| UBA3    | -0.02  | 0.296 | -0.069 | 0.945 | 0.98  | 0.29  | -0.07  | 0.944 | 0.548 | 1.751 |
| UBA2    | 0.469  | 0.303 | 1.546  | 0.122 | 1.598 | 0.484 | 1.234  | 0.217 | 0.882 | 2.895 |
| UBA1    | -0.146 | 0.297 | -0.492 | 0.622 | 0.864 | 0.256 | -0.53  | 0.596 | 0.483 | 1.546 |
| UAP1L1  | 0.457  | 0.3   | 1.524  | 0.128 | 1.579 | 0.473 | 1.223  | 0.221 | 0.877 | 2.841 |
| UAP1    | -0.31  | 0.298 | -1.043 | 0.297 | 0.733 | 0.218 | -1.223 | 0.221 | 0.409 | 1.314 |
| U2SURP  | 0.295  | 0.301 | 0.982  | 0.326 | 1.344 | 0.404 | 0.85   | 0.395 | 0.745 | 2.424 |
| U2AF2   | 0.587  | 0.303 | 1.938  | 0.053 | 1.798 | 0.544 | 1.466  | 0.143 | 0.993 | 3.254 |
| U2AF1   | 1.133  | 0.323 | 3.502  | 0     | 3.104 | 1.004 | 2.096  | 0.036 | 1.647 | 5.85  |
| TYW1    | 0.083  | 0.295 | 0.28   | 0.78  | 1.086 | 0.321 | 0.269  | 0.788 | 0.609 | 1.938 |
| TYRP1   | 0.085  | 0.296 | 0.286  | 0.775 | 1.088 | 0.322 | 0.275  | 0.784 | 0.61  | 1.943 |
| TYROBP  | 0.423  | 0.298 | 1.418  | 0.156 | 1.526 | 0.455 | 1.156  | 0.248 | 0.851 | 2.739 |
| TYRO3   | 0.222  | 0.296 | 0.748  | 0.455 | 1.248 | 0.37  | 0.671  | 0.502 | 0.698 | 2.231 |
| TYR     | 0.085  | 0.295 | 0.287  | 0.774 | 1.088 | 0.321 | 0.275  | 0.783 | 0.61  | 1.941 |
| TYMS    | 0.721  | 0.306 | 2.357  | 0.018 | 2.057 | 0.629 | 1.679  | 0.093 | 1.129 | 3.747 |
| TYMP    | 0.189  | 0.296 | 0.639  | 0.523 | 1.208 | 0.358 | 0.582  | 0.561 | 0.676 | 2.158 |
| TYK2    | -0.316 | 0.298 | -1.061 | 0.289 | 0.729 | 0.217 | -1.248 | 0.212 | 0.407 | 1.307 |
| TXNRD2  | 0.095  | 0.295 | 0.322  | 0.748 | 1.1   | 0.325 | 0.307  | 0.759 | 0.616 | 1.962 |
| TXNRD1  | 0.557  | 0.306 | 1.819  | 0.069 | 1.745 | 0.534 | 1.395  | 0.163 | 0.958 | 3.179 |
| TXNL4B  | 0.45   | 0.303 | 1.482  | 0.138 | 1.568 | 0.476 | 1.193  | 0.233 | 0.865 | 2.841 |
| TXNL4A  | -0.18  | 0.301 | -0.598 | 0.55  | 0.836 | 0.251 | -0.655 | 0.513 | 0.463 | 1.507 |
| TXNL1   | 0.018  | 0.296 | 0.062  | 0.951 | 1.018 | 0.301 | 0.061  | 0.951 | 0.57  | 1.818 |
| TXNIP   | -0.774 | 0.31  | -2.498 | 0.013 | 0.461 | 0.143 | -3.771 | 0     | 0.251 | 0.846 |
| TXNDC9  | -0.089 | 0.297 | -0.3   | 0.764 | 0.915 | 0.272 | -0.313 | 0.754 | 0.511 | 1.637 |
| TXNDC15 | -0.036 | 0.295 | -0.121 | 0.904 | 0.965 | 0.285 | -0.123 | 0.902 | 0.541 | 1.721 |
| TXN2    | -0.128 | 0.295 | -0.435 | 0.664 | 0.88  | 0.26  | -0.464 | 0.643 | 0.493 | 1.569 |
| TXN     | 1.083  | 0.328 | 3.305  | 0.001 | 2.955 | 0.969 | 2.018  | 0.044 | 1.554 | 5.617 |
| TXLNGY  | 0.242  | 0.298 | 0.812  | 0.417 | 1.273 | 0.379 | 0.721  | 0.471 | 0.711 | 2.282 |
| TXLNG   | 0.127  | 0.295 | 0.43   | 0.667 | 1.136 | 0.336 | 0.404  | 0.686 | 0.636 | 2.026 |
| TXLNA   | -0.611 | 0.306 | -2     | 0.046 | 0.543 | 0.166 | -2.757 | 0.006 | 0.298 | 0.988 |
| TXK     | -0.131 | 0.295 | -0.443 | 0.658 | 0.877 | 0.259 | -0.473 | 0.636 | 0.492 | 1.566 |
| TWSG1   | -0.155 | 0.302 | -0.513 | 0.608 | 0.856 | 0.259 | -0.555 | 0.579 | 0.473 | 1.549 |
| TWNK    | 0.494  | 0.302 | 1.634  | 0.102 | 1.638 | 0.495 | 1.289  | 0.197 | 0.906 | 2.963 |

|         |        |       |        |       |       |       |        |       |       |       |
|---------|--------|-------|--------|-------|-------|-------|--------|-------|-------|-------|
| TWIST1  | 0.11   | 0.295 | 0.372  | 0.71  | 1.116 | 0.329 | 0.352  | 0.725 | 0.626 | 1.99  |
| TWF2    | 0.577  | 0.303 | 1.901  | 0.057 | 1.78  | 0.54  | 1.445  | 0.149 | 0.982 | 3.226 |
| TWF1    | -0.515 | 0.307 | -1.679 | 0.093 | 0.598 | 0.183 | -2.196 | 0.028 | 0.328 | 1.09  |
| TVP23B  | 0.03   | 0.295 | 0.103  | 0.918 | 1.031 | 0.304 | 0.102  | 0.919 | 0.578 | 1.838 |
| TUT7    | -0.298 | 0.297 | -1.005 | 0.315 | 0.742 | 0.22  | -1.171 | 0.242 | 0.415 | 1.328 |
| TUT4    | -0.434 | 0.3   | -1.448 | 0.148 | 0.648 | 0.194 | -1.813 | 0.07  | 0.36  | 1.166 |
| TUT1    | 0.545  | 0.303 | 1.801  | 0.072 | 1.725 | 0.522 | 1.389  | 0.165 | 0.953 | 3.122 |
| TUSC3   | 0.319  | 0.297 | 1.075  | 0.283 | 1.375 | 0.408 | 0.92   | 0.357 | 0.769 | 2.459 |
| TUSC2   | -0.146 | 0.296 | -0.492 | 0.623 | 0.864 | 0.256 | -0.529 | 0.597 | 0.483 | 1.545 |
| TULP4   | 0.16   | 0.295 | 0.542  | 0.588 | 1.174 | 0.347 | 0.501  | 0.616 | 0.658 | 2.094 |
| TULP3   | 0.244  | 0.296 | 0.823  | 0.41  | 1.276 | 0.378 | 0.73   | 0.465 | 0.714 | 2.281 |
| TULP2   | -0.583 | 0.301 | -1.935 | 0.053 | 0.558 | 0.168 | -2.626 | 0.009 | 0.309 | 1.008 |
| TULP1   | 0.24   | 0.296 | 0.81   | 0.418 | 1.271 | 0.377 | 0.72   | 0.471 | 0.711 | 2.272 |
| TUG1    | 0.274  | 0.301 | 0.912  | 0.362 | 1.316 | 0.396 | 0.798  | 0.425 | 0.73  | 2.372 |
| TUFT1   | 0.039  | 0.296 | 0.133  | 0.894 | 1.04  | 0.307 | 0.13   | 0.896 | 0.583 | 1.856 |
| TUFM    | 0.041  | 0.296 | 0.14   | 0.889 | 1.042 | 0.309 | 0.137  | 0.891 | 0.583 | 1.862 |
| TUBGCP5 | 0.077  | 0.296 | 0.259  | 0.795 | 1.08  | 0.32  | 0.25   | 0.803 | 0.604 | 1.929 |
| TUBGCP4 | 0.184  | 0.297 | 0.621  | 0.534 | 1.203 | 0.357 | 0.568  | 0.57  | 0.672 | 2.152 |
| TUBGCP3 | 0.591  | 0.303 | 1.952  | 0.051 | 1.805 | 0.546 | 1.474  | 0.14  | 0.998 | 3.266 |
| TUBGCP2 | -0.23  | 0.3   | -0.768 | 0.442 | 0.794 | 0.238 | -0.864 | 0.388 | 0.441 | 1.43  |
| TUBG2   | -0.126 | 0.296 | -0.424 | 0.671 | 0.882 | 0.261 | -0.452 | 0.651 | 0.493 | 1.576 |
| TUBG1   | 0.497  | 0.302 | 1.644  | 0.1   | 1.644 | 0.497 | 1.296  | 0.195 | 0.909 | 2.975 |
| TUBD1   | 0.009  | 0.297 | 0.029  | 0.977 | 1.009 | 0.299 | 0.029  | 0.977 | 0.564 | 1.804 |
| TUBBP5  | 0.458  | 0.302 | 1.516  | 0.13  | 1.581 | 0.478 | 1.216  | 0.224 | 0.874 | 2.858 |
| TUBB7P  | 0.367  | 0.298 | 1.233  | 0.217 | 1.443 | 0.43  | 1.032  | 0.302 | 0.806 | 2.586 |
| TUBB6   | -0.234 | 0.296 | -0.789 | 0.43  | 0.792 | 0.234 | -0.889 | 0.374 | 0.443 | 1.414 |
| TUBB4B  | 0.381  | 0.298 | 1.28   | 0.201 | 1.464 | 0.437 | 1.064  | 0.287 | 0.816 | 2.627 |
| TUBB4A  | 0.223  | 0.296 | 0.752  | 0.452 | 1.25  | 0.37  | 0.674  | 0.5   | 0.699 | 2.234 |
| TUBB3   | 0.06   | 0.296 | 0.202  | 0.84  | 1.061 | 0.314 | 0.196  | 0.845 | 0.594 | 1.896 |
| TUBB2B  | -0.066 | 0.295 | -0.225 | 0.822 | 0.936 | 0.276 | -0.232 | 0.816 | 0.524 | 1.67  |
| TUBB2A  | 0.419  | 0.298 | 1.406  | 0.16  | 1.521 | 0.453 | 1.149  | 0.251 | 0.848 | 2.727 |
| TUBB1   | 0.052  | 0.295 | 0.176  | 0.861 | 1.053 | 0.311 | 0.171  | 0.864 | 0.591 | 1.878 |
| TUBB    | 0.142  | 0.295 | 0.482  | 0.63  | 1.153 | 0.341 | 0.449  | 0.653 | 0.646 | 2.057 |
| TUBAL3  | 0.217  | 0.296 | 0.732  | 0.464 | 1.242 | 0.368 | 0.658  | 0.511 | 0.695 | 2.219 |
| TUBA8   | 0.203  | 0.296 | 0.684  | 0.494 | 1.224 | 0.363 | 0.619  | 0.536 | 0.685 | 2.188 |
| TUBA4B  | 0.611  | 0.303 | 2.019  | 0.044 | 1.843 | 0.558 | 1.51   | 0.131 | 1.018 | 3.337 |
| TUBA4A  | 0.407  | 0.298 | 1.366  | 0.172 | 1.503 | 0.448 | 1.122  | 0.262 | 0.838 | 2.696 |
| TUBA1C  | 0.504  | 0.3   | 1.678  | 0.093 | 1.655 | 0.496 | 1.319  | 0.187 | 0.919 | 2.979 |



|        |        |       |        |       |       |       |        |       |       |       |
|--------|--------|-------|--------|-------|-------|-------|--------|-------|-------|-------|
| TUBA1B | 0.268  | 0.296 | 0.906  | 0.365 | 1.307 | 0.386 | 0.795  | 0.427 | 0.732 | 2.333 |
| TUBA1A | 0.136  | 0.295 | 0.459  | 0.646 | 1.145 | 0.338 | 0.43   | 0.668 | 0.642 | 2.044 |
| TUB    | -0.255 | 0.298 | -0.857 | 0.391 | 0.775 | 0.231 | -0.976 | 0.329 | 0.432 | 1.389 |
| TTYH1  | 0.257  | 0.298 | 0.863  | 0.388 | 1.294 | 0.386 | 0.761  | 0.446 | 0.721 | 2.321 |
| TTY15  | 0.188  | 0.296 | 0.636  | 0.525 | 1.207 | 0.357 | 0.58   | 0.562 | 0.676 | 2.154 |
| TTY14  | -0.476 | 0.302 | -1.573 | 0.116 | 0.622 | 0.188 | -2.015 | 0.044 | 0.344 | 1.124 |
| TTR    | -0.129 | 0.296 | -0.436 | 0.663 | 0.879 | 0.261 | -0.465 | 0.642 | 0.491 | 1.571 |
| TTPAL  | 0.788  | 0.31  | 2.544  | 0.011 | 2.2   | 0.682 | 1.76   | 0.078 | 1.198 | 4.038 |
| TTPA   | 0.08   | 0.295 | 0.272  | 0.786 | 1.083 | 0.32  | 0.261  | 0.794 | 0.608 | 1.932 |
| TTN    | 0.051  | 0.296 | 0.171  | 0.864 | 1.052 | 0.311 | 0.167  | 0.868 | 0.589 | 1.879 |
| TTLL7  | 0.33   | 0.298 | 1.111  | 0.267 | 1.392 | 0.414 | 0.946  | 0.344 | 0.777 | 2.493 |
| TTLL5  | -0.062 | 0.296 | -0.21  | 0.834 | 0.94  | 0.278 | -0.216 | 0.829 | 0.526 | 1.679 |
| TTLL4  | 0.169  | 0.297 | 0.571  | 0.568 | 1.184 | 0.351 | 0.525  | 0.6   | 0.662 | 2.119 |
| TTLL12 | 0.392  | 0.298 | 1.315  | 0.189 | 1.479 | 0.441 | 1.088  | 0.277 | 0.825 | 2.652 |
| TTLL1  | -0.339 | 0.3   | -1.127 | 0.26  | 0.713 | 0.214 | -1.342 | 0.18  | 0.396 | 1.284 |
| TTK    | 0.493  | 0.302 | 1.63   | 0.103 | 1.637 | 0.495 | 1.287  | 0.198 | 0.905 | 2.962 |
| TTI2   | -0.18  | 0.297 | -0.607 | 0.544 | 0.835 | 0.248 | -0.665 | 0.506 | 0.467 | 1.494 |
| TTI1   | -0.233 | 0.297 | -0.784 | 0.433 | 0.792 | 0.235 | -0.882 | 0.378 | 0.443 | 1.418 |
| TTF2   | 0.58   | 0.306 | 1.898  | 0.058 | 1.786 | 0.546 | 1.44   | 0.15  | 0.981 | 3.251 |
| TTF1   | 0.45   | 0.3   | 1.501  | 0.133 | 1.569 | 0.471 | 1.208  | 0.227 | 0.871 | 2.826 |
| TTC9   | 0.275  | 0.298 | 0.923  | 0.356 | 1.316 | 0.392 | 0.807  | 0.42  | 0.734 | 2.359 |
| TTC4   | 0.744  | 0.308 | 2.415  | 0.016 | 2.104 | 0.648 | 1.704  | 0.088 | 1.15  | 3.847 |
| TTC39A | -0.198 | 0.298 | -0.664 | 0.507 | 0.82  | 0.245 | -0.734 | 0.463 | 0.457 | 1.472 |
| TTC38  | -0.579 | 0.306 | -1.894 | 0.058 | 0.561 | 0.171 | -2.565 | 0.01  | 0.308 | 1.02  |
| TTC37  | -0.329 | 0.3   | -1.096 | 0.273 | 0.72  | 0.216 | -1.298 | 0.194 | 0.399 | 1.296 |
| TTC33  | 0.44   | 0.3   | 1.464  | 0.143 | 1.552 | 0.466 | 1.185  | 0.236 | 0.862 | 2.795 |
| TTC31  | -0.552 | 0.306 | -1.808 | 0.071 | 0.576 | 0.176 | -2.413 | 0.016 | 0.316 | 1.048 |
| TTC30A | 0.151  | 0.296 | 0.509  | 0.611 | 1.162 | 0.344 | 0.472  | 0.637 | 0.651 | 2.076 |
| TTC28  | -0.659 | 0.306 | -2.155 | 0.031 | 0.517 | 0.158 | -3.05  | 0.002 | 0.284 | 0.942 |
| TTC27  | 0.34   | 0.3   | 1.135  | 0.256 | 1.405 | 0.421 | 0.962  | 0.336 | 0.781 | 2.529 |
| TTC26  | -0.027 | 0.297 | -0.089 | 0.929 | 0.974 | 0.289 | -0.091 | 0.928 | 0.544 | 1.743 |
| TTC23  | -0.055 | 0.296 | -0.187 | 0.852 | 0.946 | 0.28  | -0.192 | 0.848 | 0.53  | 1.69  |
| TTC22  | 0.081  | 0.295 | 0.274  | 0.784 | 1.084 | 0.32  | 0.263  | 0.792 | 0.608 | 1.934 |
| TTC19  | -0.331 | 0.298 | -1.112 | 0.266 | 0.718 | 0.214 | -1.318 | 0.188 | 0.4   | 1.288 |
| TTC17  | 0.64   | 0.306 | 2.093  | 0.036 | 1.897 | 0.58  | 1.546  | 0.122 | 1.042 | 3.455 |
| TTC13  | 0.734  | 0.316 | 2.326  | 0.02  | 2.084 | 0.658 | 1.648  | 0.099 | 1.123 | 3.869 |
| TTC12  | -0.026 | 0.297 | -0.088 | 0.93  | 0.974 | 0.289 | -0.089 | 0.929 | 0.545 | 1.743 |
| TTC1   | -0.259 | 0.3   | -0.862 | 0.389 | 0.772 | 0.232 | -0.984 | 0.325 | 0.429 | 1.39  |

|          |        |       |        |       |       |       |        |       |       |       |
|----------|--------|-------|--------|-------|-------|-------|--------|-------|-------|-------|
| TTBK2    | 0.312  | 0.298 | 1.046  | 0.295 | 1.366 | 0.407 | 0.899  | 0.369 | 0.762 | 2.45  |
| TST      | 0.388  | 0.3   | 1.293  | 0.196 | 1.473 | 0.441 | 1.072  | 0.284 | 0.819 | 2.65  |
| TSSK2    | -0.473 | 0.3   | -1.578 | 0.114 | 0.623 | 0.187 | -2.018 | 0.044 | 0.346 | 1.121 |
| TSSK1B   | 1.264  | 0.332 | 3.812  | 0     | 3.539 | 1.173 | 2.164  | 0.03  | 1.848 | 6.776 |
| TSSC4    | 0.464  | 0.303 | 1.532  | 0.125 | 1.59  | 0.481 | 1.226  | 0.22  | 0.879 | 2.878 |
| TSR3     | 0.004  | 0.295 | 0.014  | 0.989 | 1.004 | 0.297 | 0.014  | 0.989 | 0.563 | 1.791 |
| TSR2     | 0.245  | 0.296 | 0.828  | 0.408 | 1.277 | 0.378 | 0.735  | 0.463 | 0.716 | 2.28  |
| TSR1     | 0.077  | 0.295 | 0.26   | 0.795 | 1.08  | 0.319 | 0.25   | 0.802 | 0.606 | 1.925 |
| TSPYL5   | 0.027  | 0.295 | 0.093  | 0.926 | 1.028 | 0.304 | 0.092  | 0.927 | 0.576 | 1.834 |
| TSPYL4   | -0.149 | 0.296 | -0.503 | 0.615 | 0.862 | 0.255 | -0.542 | 0.587 | 0.482 | 1.539 |
| TSPYL2   | -0.222 | 0.297 | -0.748 | 0.455 | 0.801 | 0.238 | -0.837 | 0.402 | 0.448 | 1.433 |
| TSPYL1   | -0.321 | 0.297 | -1.082 | 0.279 | 0.725 | 0.215 | -1.276 | 0.202 | 0.406 | 1.298 |
| TSPY1    | 0.529  | 0.303 | 1.747  | 0.081 | 1.698 | 0.514 | 1.357  | 0.175 | 0.938 | 3.075 |
| TSPOAP1  | -0.147 | 0.296 | -0.496 | 0.62  | 0.863 | 0.256 | -0.534 | 0.593 | 0.483 | 1.542 |
| TSPO2    | 0.111  | 0.296 | 0.373  | 0.709 | 1.117 | 0.331 | 0.353  | 0.724 | 0.625 | 1.996 |
| TSPO     | -0.267 | 0.298 | -0.896 | 0.37  | 0.766 | 0.228 | -1.027 | 0.304 | 0.427 | 1.373 |
| TSPAN9   | 0.307  | 0.298 | 1.03   | 0.303 | 1.359 | 0.405 | 0.887  | 0.375 | 0.758 | 2.437 |
| TSPAN8   | -0.134 | 0.296 | -0.452 | 0.651 | 0.875 | 0.259 | -0.483 | 0.629 | 0.489 | 1.564 |
| TSPAN7   | -0.55  | 0.303 | -1.817 | 0.069 | 0.577 | 0.175 | -2.423 | 0.015 | 0.319 | 1.044 |
| TSPAN6   | -0.163 | 0.296 | -0.55  | 0.582 | 0.85  | 0.251 | -0.597 | 0.55  | 0.476 | 1.517 |
| TSPAN5   | 0.178  | 0.296 | 0.601  | 0.548 | 1.195 | 0.354 | 0.55   | 0.582 | 0.669 | 2.135 |
| TSPAN4   | -0.325 | 0.298 | -1.093 | 0.274 | 0.722 | 0.215 | -1.291 | 0.197 | 0.403 | 1.295 |
| TSPAN32  | 0.121  | 0.296 | 0.407  | 0.684 | 1.128 | 0.334 | 0.383  | 0.702 | 0.631 | 2.017 |
| TSPAN31  | 0.302  | 0.297 | 1.017  | 0.309 | 1.353 | 0.402 | 0.878  | 0.38  | 0.756 | 2.421 |
| TSPAN3   | -0.579 | 0.304 | -1.907 | 0.057 | 0.56  | 0.17  | -2.582 | 0.01  | 0.309 | 1.016 |
| TSPAN2   | 0.043  | 0.296 | 0.145  | 0.885 | 1.044 | 0.309 | 0.142  | 0.887 | 0.584 | 1.866 |
| TSPAN15  | -0.056 | 0.295 | -0.19  | 0.849 | 0.945 | 0.279 | -0.195 | 0.845 | 0.53  | 1.687 |
| TSPAN14  | 0.351  | 0.298 | 1.177  | 0.239 | 1.42  | 0.423 | 0.993  | 0.321 | 0.792 | 2.546 |
| TSPAN13  | 0.42   | 0.299 | 1.404  | 0.16  | 1.522 | 0.455 | 1.147  | 0.251 | 0.847 | 2.734 |
| TSPAN12  | 0.26   | 0.298 | 0.875  | 0.381 | 1.298 | 0.386 | 0.771  | 0.441 | 0.724 | 2.325 |
| TSPAN1   | -0.199 | 0.296 | -0.672 | 0.501 | 0.819 | 0.243 | -0.744 | 0.457 | 0.459 | 1.464 |
| TSNAXIP1 | 0.115  | 0.295 | 0.389  | 0.697 | 1.122 | 0.331 | 0.368  | 0.713 | 0.629 | 2.002 |
| TSNAX    | 0.023  | 0.295 | 0.077  | 0.939 | 1.023 | 0.302 | 0.076  | 0.94  | 0.574 | 1.823 |
| TSN      | 0.719  | 0.315 | 2.281  | 0.023 | 2.052 | 0.646 | 1.627  | 0.104 | 1.107 | 3.804 |
| TSKU     | -0.473 | 0.302 | -1.567 | 0.117 | 0.623 | 0.188 | -2.004 | 0.045 | 0.344 | 1.126 |
| TSKS     | 0.078  | 0.296 | 0.262  | 0.793 | 1.081 | 0.32  | 0.252  | 0.801 | 0.605 | 1.93  |
| TSHZ2    | 0.335  | 0.3   | 1.118  | 0.264 | 1.398 | 0.419 | 0.95   | 0.342 | 0.777 | 2.516 |
| TSHR     | -0.24  | 0.296 | -0.81  | 0.418 | 0.787 | 0.233 | -0.915 | 0.36  | 0.44  | 1.406 |

|          |        |       |        |       |       |       |        |       |       |       |
|----------|--------|-------|--------|-------|-------|-------|--------|-------|-------|-------|
| TSHB     | -0.326 | 0.297 | -1.095 | 0.273 | 0.722 | 0.215 | -1.295 | 0.195 | 0.403 | 1.293 |
| TSGA10   | -0.158 | 0.298 | -0.531 | 0.596 | 0.854 | 0.254 | -0.575 | 0.565 | 0.476 | 1.531 |
| TSG101   | 0.362  | 0.299 | 1.211  | 0.226 | 1.437 | 0.43  | 1.016  | 0.31  | 0.799 | 2.583 |
| TSFM     | 0.187  | 0.295 | 0.632  | 0.527 | 1.205 | 0.356 | 0.577  | 0.564 | 0.676 | 2.15  |
| TSEN34   | 0.937  | 0.315 | 2.976  | 0.003 | 2.553 | 0.804 | 1.931  | 0.053 | 1.377 | 4.734 |
| TSEN2    | -0.165 | 0.296 | -0.559 | 0.576 | 0.848 | 0.251 | -0.608 | 0.543 | 0.475 | 1.513 |
| TSC22D4  | -0.052 | 0.297 | -0.174 | 0.862 | 0.95  | 0.282 | -0.179 | 0.858 | 0.53  | 1.7   |
| TSC22D3  | -0.501 | 0.307 | -1.633 | 0.103 | 0.606 | 0.186 | -2.119 | 0.034 | 0.332 | 1.106 |
| TSC22D2  | 0.515  | 0.303 | 1.701  | 0.089 | 1.673 | 0.506 | 1.329  | 0.184 | 0.925 | 3.028 |
| TSC22D1  | 0.021  | 0.295 | 0.071  | 0.944 | 1.021 | 0.302 | 0.07   | 0.944 | 0.572 | 1.822 |
| TSC2     | -0.933 | 0.321 | -2.91  | 0.004 | 0.393 | 0.126 | -4.809 | 0     | 0.21  | 0.737 |
| TSC1     | -0.025 | 0.297 | -0.083 | 0.934 | 0.976 | 0.29  | -0.084 | 0.933 | 0.545 | 1.747 |
| TSBP1    | -0.062 | 0.297 | -0.21  | 0.833 | 0.939 | 0.279 | -0.217 | 0.828 | 0.525 | 1.681 |
| TRRAP    | -0.203 | 0.296 | -0.685 | 0.493 | 0.816 | 0.242 | -0.76  | 0.447 | 0.457 | 1.459 |
| TRPV6    | 0.406  | 0.298 | 1.361  | 0.173 | 1.5   | 0.447 | 1.119  | 0.263 | 0.837 | 2.69  |
| TRPV5    | 0.444  | 0.303 | 1.467  | 0.142 | 1.559 | 0.472 | 1.185  | 0.236 | 0.862 | 2.821 |
| TRPV4    | 0.238  | 0.297 | 0.799  | 0.424 | 1.268 | 0.377 | 0.711  | 0.477 | 0.708 | 2.272 |
| TRPV2    | 0.073  | 0.296 | 0.247  | 0.805 | 1.076 | 0.318 | 0.238  | 0.812 | 0.602 | 1.922 |
| TRPS1    | -0.202 | 0.298 | -0.678 | 0.498 | 0.817 | 0.243 | -0.751 | 0.453 | 0.456 | 1.465 |
| TRPM8    | 0.073  | 0.295 | 0.247  | 0.805 | 1.076 | 0.318 | 0.238  | 0.812 | 0.603 | 1.919 |
| TRPM6    | 0.312  | 0.3   | 1.037  | 0.3   | 1.366 | 0.41  | 0.891  | 0.373 | 0.758 | 2.461 |
| TRPM4    | 0.064  | 0.295 | 0.218  | 0.828 | 1.066 | 0.315 | 0.211  | 0.833 | 0.598 | 1.903 |
| TRPM3    | -0.399 | 0.299 | -1.336 | 0.182 | 0.671 | 0.2   | -1.641 | 0.101 | 0.374 | 1.205 |
| TRPM2    | 0.07   | 0.297 | 0.237  | 0.813 | 1.073 | 0.318 | 0.229  | 0.819 | 0.6   | 1.918 |
| TRPM1    | 0.172  | 0.296 | 0.581  | 0.562 | 1.188 | 0.352 | 0.533  | 0.594 | 0.665 | 2.122 |
| TRPC7    | 0.348  | 0.3   | 1.159  | 0.246 | 1.417 | 0.426 | 0.979  | 0.328 | 0.786 | 2.553 |
| TRPC6    | -0.263 | 0.298 | -0.884 | 0.376 | 0.768 | 0.229 | -1.012 | 0.312 | 0.429 | 1.377 |
| TRPC5    | 0.041  | 0.295 | 0.14   | 0.888 | 1.042 | 0.308 | 0.137  | 0.891 | 0.585 | 1.858 |
| TRPC4AP  | 0.322  | 0.298 | 1.08   | 0.28  | 1.38  | 0.411 | 0.924  | 0.356 | 0.769 | 2.474 |
| TRPC4    | 0.156  | 0.295 | 0.528  | 0.597 | 1.169 | 0.345 | 0.489  | 0.625 | 0.655 | 2.085 |
| TRPC3    | -0.23  | 0.297 | -0.775 | 0.438 | 0.794 | 0.236 | -0.872 | 0.383 | 0.444 | 1.421 |
| TRPC2    | -0.323 | 0.298 | -1.085 | 0.278 | 0.724 | 0.216 | -1.28  | 0.2   | 0.404 | 1.298 |
| TRPC1    | 0.019  | 0.296 | 0.064  | 0.949 | 1.019 | 0.302 | 0.064  | 0.949 | 0.57  | 1.821 |
| TRPA1    | 0.063  | 0.295 | 0.212  | 0.832 | 1.065 | 0.315 | 0.205  | 0.837 | 0.597 | 1.9   |
| TROAP    | 0.71   | 0.31  | 2.291  | 0.022 | 2.034 | 0.63  | 1.64   | 0.101 | 1.108 | 3.733 |
| TRO      | -0.411 | 0.3   | -1.372 | 0.17  | 0.663 | 0.199 | -1.697 | 0.09  | 0.369 | 1.193 |
| TRNAU1AP | 1.03   | 0.318 | 3.241  | 0.001 | 2.8   | 0.889 | 2.024  | 0.043 | 1.502 | 5.218 |
| TRMU     | 0.211  | 0.295 | 0.714  | 0.475 | 1.235 | 0.365 | 0.644  | 0.52  | 0.692 | 2.203 |

|         |        |       |        |       |       |       |        |       |       |       |
|---------|--------|-------|--------|-------|-------|-------|--------|-------|-------|-------|
| TRMT9B  | -0.181 | 0.296 | -0.61  | 0.542 | 0.835 | 0.247 | -0.669 | 0.503 | 0.467 | 1.491 |
| TRMT61B | 0.05   | 0.295 | 0.17   | 0.865 | 1.051 | 0.31  | 0.166  | 0.869 | 0.589 | 1.875 |
| TRMT61A | 0.487  | 0.3   | 1.622  | 0.105 | 1.627 | 0.489 | 1.284  | 0.199 | 0.903 | 2.931 |
| TRMT5   | -0.074 | 0.296 | -0.25  | 0.803 | 0.929 | 0.275 | -0.26  | 0.795 | 0.52  | 1.66  |
| TRMT44  | -0.344 | 0.3   | -1.147 | 0.251 | 0.709 | 0.213 | -1.368 | 0.171 | 0.394 | 1.276 |
| TRMT2B  | -0.291 | 0.299 | -0.973 | 0.331 | 0.748 | 0.223 | -1.129 | 0.259 | 0.416 | 1.343 |
| TRMT2A  | -0.493 | 0.303 | -1.628 | 0.103 | 0.611 | 0.185 | -2.104 | 0.035 | 0.338 | 1.106 |
| TRMT1L  | -0.187 | 0.3   | -0.623 | 0.533 | 0.83  | 0.249 | -0.685 | 0.493 | 0.461 | 1.493 |
| TRMT13  | -0.135 | 0.296 | -0.458 | 0.647 | 0.873 | 0.258 | -0.49  | 0.624 | 0.489 | 1.56  |
| TRMT12  | 0.275  | 0.298 | 0.924  | 0.355 | 1.317 | 0.392 | 0.808  | 0.419 | 0.735 | 2.361 |
| TRMT112 | 0.255  | 0.298 | 0.855  | 0.392 | 1.29  | 0.384 | 0.755  | 0.45  | 0.72  | 2.312 |
| TRMT11  | 0.537  | 0.302 | 1.776  | 0.076 | 1.711 | 0.517 | 1.374  | 0.169 | 0.946 | 3.094 |
| TRMT1   | 0.177  | 0.296 | 0.596  | 0.551 | 1.193 | 0.354 | 0.546  | 0.585 | 0.667 | 2.133 |
| TRMO    | 0.177  | 0.296 | 0.598  | 0.55  | 1.194 | 0.353 | 0.548  | 0.584 | 0.668 | 2.133 |
| TRIT1   | 1.01   | 0.321 | 3.147  | 0.002 | 2.746 | 0.881 | 1.981  | 0.048 | 1.464 | 5.151 |
| TRIP6   | -0.17  | 0.296 | -0.573 | 0.566 | 0.844 | 0.25  | -0.625 | 0.532 | 0.472 | 1.508 |
| TRIP4   | 0.368  | 0.297 | 1.238  | 0.216 | 1.445 | 0.429 | 1.036  | 0.3   | 0.807 | 2.586 |
| TRIP13  | 0.807  | 0.315 | 2.563  | 0.01  | 2.24  | 0.705 | 1.759  | 0.079 | 1.209 | 4.151 |
| TRIP12  | -0.4   | 0.298 | -1.342 | 0.18  | 0.67  | 0.2   | -1.65  | 0.099 | 0.374 | 1.202 |
| TRIP11  | 0.164  | 0.296 | 0.555  | 0.579 | 1.178 | 0.348 | 0.512  | 0.609 | 0.66  | 2.103 |
| TRIP10  | -0.494 | 0.302 | -1.636 | 0.102 | 0.61  | 0.184 | -2.115 | 0.034 | 0.338 | 1.103 |
| TRIOBP  | 0.132  | 0.296 | 0.447  | 0.655 | 1.142 | 0.338 | 0.419  | 0.675 | 0.639 | 2.04  |
| TRIO    | -0.571 | 0.303 | -1.885 | 0.059 | 0.565 | 0.171 | -2.541 | 0.011 | 0.312 | 1.023 |
| TRIM9   | 0.177  | 0.296 | 0.598  | 0.55  | 1.193 | 0.353 | 0.548  | 0.584 | 0.669 | 2.13  |
| TRIM8   | -0.201 | 0.296 | -0.678 | 0.498 | 0.818 | 0.242 | -0.751 | 0.453 | 0.458 | 1.462 |
| TRIM68  | 0.3    | 0.3   | 1.002  | 0.316 | 1.35  | 0.405 | 0.865  | 0.387 | 0.75  | 2.429 |
| TRIM66  | 0.317  | 0.3   | 1.056  | 0.291 | 1.373 | 0.412 | 0.905  | 0.365 | 0.762 | 2.472 |
| TRIM62  | -0.032 | 0.295 | -0.109 | 0.913 | 0.968 | 0.286 | -0.11  | 0.912 | 0.543 | 1.727 |
| TRIM58  | -0.286 | 0.297 | -0.963 | 0.336 | 0.751 | 0.223 | -1.115 | 0.265 | 0.419 | 1.345 |
| TRIM52  | 0.077  | 0.296 | 0.259  | 0.796 | 1.08  | 0.319 | 0.249  | 0.803 | 0.605 | 1.927 |
| TRIM5   | 0.341  | 0.3   | 1.139  | 0.255 | 1.406 | 0.421 | 0.965  | 0.335 | 0.782 | 2.53  |
| TRIM46  | 0.03   | 0.296 | 0.102  | 0.918 | 1.031 | 0.305 | 0.101  | 0.92  | 0.577 | 1.842 |
| TRIM45  | -0.128 | 0.296 | -0.433 | 0.665 | 0.88  | 0.26  | -0.462 | 0.644 | 0.493 | 1.57  |
| TRIM44  | 0.025  | 0.296 | 0.084  | 0.933 | 1.025 | 0.303 | 0.083  | 0.934 | 0.574 | 1.831 |
| TRIM38  | 0.392  | 0.3   | 1.308  | 0.191 | 1.48  | 0.444 | 1.082  | 0.279 | 0.822 | 2.665 |
| TRIM37  | 0.18   | 0.296 | 0.606  | 0.544 | 1.197 | 0.355 | 0.555  | 0.579 | 0.67  | 2.139 |
| TRIM36  | 0.019  | 0.295 | 0.063  | 0.949 | 1.019 | 0.301 | 0.063  | 0.95  | 0.571 | 1.817 |
| TRIM33  | 0.15   | 0.295 | 0.508  | 0.612 | 1.162 | 0.343 | 0.472  | 0.637 | 0.651 | 2.073 |

|          |        |       |        |       |       |       |        |       |       |       |
|----------|--------|-------|--------|-------|-------|-------|--------|-------|-------|-------|
| TRIM32   | 0.688  | 0.306 | 2.248  | 0.025 | 1.99  | 0.609 | 1.625  | 0.104 | 1.092 | 3.627 |
| TRIM31   | -0.029 | 0.295 | -0.098 | 0.922 | 0.972 | 0.287 | -0.099 | 0.921 | 0.545 | 1.733 |
| TRIM3    | 0.376  | 0.298 | 1.263  | 0.206 | 1.457 | 0.434 | 1.053  | 0.292 | 0.813 | 2.611 |
| TRIM29   | -0.586 | 0.302 | -1.937 | 0.053 | 0.557 | 0.168 | -2.634 | 0.008 | 0.308 | 1.007 |
| TRIM28   | -0.777 | 0.315 | -2.468 | 0.014 | 0.46  | 0.145 | -3.732 | 0     | 0.248 | 0.852 |
| TRIM27   | 0.24   | 0.297 | 0.807  | 0.42  | 1.271 | 0.378 | 0.718  | 0.473 | 0.71  | 2.277 |
| TRIM26   | 0.166  | 0.298 | 0.555  | 0.579 | 1.18  | 0.352 | 0.512  | 0.609 | 0.658 | 2.117 |
| TRIM25   | -0.267 | 0.298 | -0.899 | 0.369 | 0.765 | 0.228 | -1.03  | 0.303 | 0.427 | 1.371 |
| TRIM24   | -0.191 | 0.296 | -0.645 | 0.519 | 0.826 | 0.245 | -0.71  | 0.477 | 0.462 | 1.476 |
| TRIM23   | -0.524 | 0.306 | -1.711 | 0.087 | 0.592 | 0.181 | -2.249 | 0.025 | 0.325 | 1.079 |
| TRIM22   | -0.551 | 0.303 | -1.819 | 0.069 | 0.577 | 0.175 | -2.425 | 0.015 | 0.319 | 1.044 |
| TRIM21   | -0.003 | 0.295 | -0.01  | 0.992 | 0.997 | 0.294 | -0.01  | 0.992 | 0.559 | 1.778 |
| TRIM2    | -0.389 | 0.299 | -1.3   | 0.193 | 0.678 | 0.203 | -1.59  | 0.112 | 0.377 | 1.218 |
| TRIM17   | 0.08   | 0.296 | 0.269  | 0.788 | 1.083 | 0.321 | 0.259  | 0.796 | 0.606 | 1.935 |
| TRIM16   | 0.098  | 0.295 | 0.333  | 0.739 | 1.103 | 0.326 | 0.317  | 0.751 | 0.618 | 1.968 |
| TRIM15   | 0.082  | 0.298 | 0.274  | 0.784 | 1.085 | 0.324 | 0.263  | 0.792 | 0.605 | 1.947 |
| TRIM14   | 0.205  | 0.296 | 0.691  | 0.49  | 1.227 | 0.363 | 0.625  | 0.532 | 0.687 | 2.193 |
| TRIM13   | -0.156 | 0.296 | -0.526 | 0.599 | 0.856 | 0.254 | -0.569 | 0.569 | 0.479 | 1.53  |
| TRIM10   | 0.041  | 0.295 | 0.14   | 0.888 | 1.042 | 0.308 | 0.138  | 0.891 | 0.584 | 1.859 |
| TRIL     | -0.03  | 0.295 | -0.102 | 0.919 | 0.97  | 0.286 | -0.103 | 0.918 | 0.544 | 1.73  |
| TRIB3    | 0.081  | 0.295 | 0.273  | 0.785 | 1.084 | 0.32  | 0.262  | 0.793 | 0.608 | 1.934 |
| TRIB2    | -0.129 | 0.296 | -0.438 | 0.662 | 0.879 | 0.26  | -0.467 | 0.64  | 0.492 | 1.568 |
| TRIB1    | -0.047 | 0.295 | -0.16  | 0.873 | 0.954 | 0.282 | -0.164 | 0.869 | 0.534 | 1.702 |
| TRIAP1   | 0.86   | 0.315 | 2.731  | 0.006 | 2.364 | 0.745 | 1.831  | 0.067 | 1.275 | 4.382 |
| TRHR     | -0.09  | 0.297 | -0.302 | 0.762 | 0.914 | 0.271 | -0.316 | 0.752 | 0.511 | 1.635 |
| TRHDE    | -0.616 | 0.31  | -1.988 | 0.047 | 0.54  | 0.167 | -2.748 | 0.006 | 0.294 | 0.991 |
| TRH      | -0.464 | 0.302 | -1.536 | 0.125 | 0.629 | 0.19  | -1.954 | 0.051 | 0.348 | 1.137 |
| TREML2   | -0.567 | 0.303 | -1.868 | 0.062 | 0.567 | 0.172 | -2.513 | 0.012 | 0.313 | 1.028 |
| TREM2    | -0.585 | 0.31  | -1.887 | 0.059 | 0.557 | 0.173 | -2.564 | 0.01  | 0.303 | 1.023 |
| TREM1    | 0.598  | 0.302 | 1.976  | 0.048 | 1.818 | 0.55  | 1.488  | 0.137 | 1.005 | 3.288 |
| TREH     | 0.606  | 0.306 | 1.98   | 0.048 | 1.832 | 0.56  | 1.486  | 0.137 | 1.006 | 3.336 |
| TRDN     | 0.198  | 0.298 | 0.667  | 0.505 | 1.22  | 0.363 | 0.605  | 0.545 | 0.68  | 2.186 |
| TRDMT1   | -0.37  | 0.3   | -1.232 | 0.218 | 0.691 | 0.207 | -1.49  | 0.136 | 0.384 | 1.244 |
| TRBC1    | -0.518 | 0.303 | -1.714 | 0.087 | 0.595 | 0.18  | -2.246 | 0.025 | 0.329 | 1.077 |
| TRAV8-3  | -0.155 | 0.296 | -0.523 | 0.601 | 0.857 | 0.253 | -0.566 | 0.571 | 0.48  | 1.53  |
| TRAV12-2 | 0.375  | 0.299 | 1.257  | 0.209 | 1.456 | 0.435 | 1.048  | 0.295 | 0.811 | 2.614 |
| TRAT1    | -0.298 | 0.298 | -1     | 0.317 | 0.743 | 0.221 | -1.165 | 0.244 | 0.414 | 1.331 |
| TRAPPC9  | 0.625  | 0.31  | 2.015  | 0.044 | 1.869 | 0.58  | 1.498  | 0.134 | 1.017 | 3.433 |

|          |        |       |        |       |       |       |        |       |       |       |
|----------|--------|-------|--------|-------|-------|-------|--------|-------|-------|-------|
| TRAPPC8  | -0.087 | 0.297 | -0.293 | 0.769 | 0.917 | 0.272 | -0.306 | 0.759 | 0.512 | 1.64  |
| TRAPPC6A | 0.004  | 0.296 | 0.014  | 0.989 | 1.004 | 0.297 | 0.014  | 0.989 | 0.562 | 1.795 |
| TRAPPC3  | 0.208  | 0.296 | 0.701  | 0.483 | 1.231 | 0.365 | 0.633  | 0.527 | 0.689 | 2.199 |
| TRAPPC2L | 0.313  | 0.298 | 1.051  | 0.293 | 1.367 | 0.407 | 0.902  | 0.367 | 0.763 | 2.45  |
| TRAPPC2  | 0.364  | 0.298 | 1.22   | 0.222 | 1.438 | 0.429 | 1.023  | 0.306 | 0.802 | 2.579 |
| TRAPPC13 | 0.198  | 0.297 | 0.664  | 0.506 | 1.218 | 0.362 | 0.603  | 0.547 | 0.68  | 2.182 |
| TRAPPC12 | -0.399 | 0.3   | -1.33  | 0.183 | 0.671 | 0.201 | -1.634 | 0.102 | 0.373 | 1.208 |
| TRAPPC11 | -0.276 | 0.3   | -0.918 | 0.359 | 0.759 | 0.228 | -1.057 | 0.29  | 0.421 | 1.367 |
| TRAPPC10 | -0.08  | 0.295 | -0.272 | 0.786 | 0.923 | 0.273 | -0.283 | 0.777 | 0.517 | 1.646 |
| TRAP1    | 0.286  | 0.298 | 0.961  | 0.337 | 1.331 | 0.396 | 0.835  | 0.403 | 0.743 | 2.386 |
| TRANK1   | -0.266 | 0.296 | -0.897 | 0.37  | 0.767 | 0.227 | -1.027 | 0.304 | 0.429 | 1.37  |
| TRAM2    | -0.265 | 0.296 | -0.896 | 0.37  | 0.767 | 0.227 | -1.026 | 0.305 | 0.429 | 1.371 |
| TRAM1    | -0.078 | 0.295 | -0.265 | 0.791 | 0.925 | 0.273 | -0.276 | 0.783 | 0.518 | 1.65  |
| TRAK2    | -0.128 | 0.295 | -0.434 | 0.664 | 0.88  | 0.26  | -0.463 | 0.643 | 0.493 | 1.569 |
| TRAK1    | -0.826 | 0.315 | -2.624 | 0.009 | 0.438 | 0.138 | -4.079 | 0     | 0.236 | 0.811 |
| TRAIP    | 0.204  | 0.296 | 0.691  | 0.489 | 1.227 | 0.363 | 0.625  | 0.532 | 0.687 | 2.191 |
| TRAFD1   | -0.395 | 0.3   | -1.32  | 0.187 | 0.673 | 0.202 | -1.619 | 0.106 | 0.374 | 1.211 |
| TRAF6    | 0.118  | 0.296 | 0.4    | 0.689 | 1.126 | 0.333 | 0.377  | 0.706 | 0.63  | 2.01  |
| TRAF5    | -0.036 | 0.295 | -0.122 | 0.903 | 0.964 | 0.285 | -0.125 | 0.901 | 0.541 | 1.721 |
| TRAF4    | 0.436  | 0.298 | 1.465  | 0.143 | 1.547 | 0.461 | 1.187  | 0.235 | 0.863 | 2.773 |
| TRAF3IP3 | 0.079  | 0.295 | 0.267  | 0.79  | 1.082 | 0.32  | 0.257  | 0.798 | 0.606 | 1.931 |
| TRAF3IP2 | -0.198 | 0.296 | -0.668 | 0.504 | 0.82  | 0.243 | -0.739 | 0.46  | 0.459 | 1.466 |
| TRAF3IP1 | 0.011  | 0.295 | 0.038  | 0.97  | 1.011 | 0.298 | 0.037  | 0.97  | 0.567 | 1.803 |
| TRAF3    | -0.401 | 0.3   | -1.337 | 0.181 | 0.67  | 0.201 | -1.644 | 0.1   | 0.372 | 1.205 |
| TRAF2    | 0.307  | 0.298 | 1.032  | 0.302 | 1.36  | 0.405 | 0.888  | 0.374 | 0.759 | 2.438 |
| TRAF1    | -0.628 | 0.304 | -2.062 | 0.039 | 0.534 | 0.162 | -2.87  | 0.004 | 0.294 | 0.969 |
| TRADD    | 0.786  | 0.311 | 2.528  | 0.011 | 2.195 | 0.683 | 1.751  | 0.08  | 1.193 | 4.039 |
| TRAC     | -0.674 | 0.307 | -2.198 | 0.028 | 0.51  | 0.156 | -3.138 | 0.002 | 0.279 | 0.929 |
| TRABD    | -0.335 | 0.3   | -1.119 | 0.263 | 0.715 | 0.214 | -1.33  | 0.184 | 0.398 | 1.286 |
| TRA2B    | 0.045  | 0.295 | 0.152  | 0.879 | 1.046 | 0.309 | 0.149  | 0.882 | 0.586 | 1.865 |
| TRA2A    | 0.238  | 0.297 | 0.8    | 0.424 | 1.268 | 0.377 | 0.712  | 0.476 | 0.708 | 2.271 |
| TPX2     | 0.694  | 0.31  | 2.239  | 0.025 | 2.001 | 0.62  | 1.615  | 0.106 | 1.09  | 3.674 |
| TPTE     | 0.239  | 0.296 | 0.806  | 0.42  | 1.269 | 0.376 | 0.717  | 0.473 | 0.711 | 2.268 |
| TPT1P8   | -0.127 | 0.297 | -0.429 | 0.668 | 0.88  | 0.261 | -0.458 | 0.647 | 0.492 | 1.575 |
| TPT1     | -0.378 | 0.306 | -1.237 | 0.216 | 0.685 | 0.209 | -1.503 | 0.133 | 0.376 | 1.247 |
| TPST2    | -0.502 | 0.302 | -1.66  | 0.097 | 0.605 | 0.183 | -2.156 | 0.031 | 0.335 | 1.095 |
| TPST1    | 0.495  | 0.301 | 1.644  | 0.1   | 1.64  | 0.493 | 1.297  | 0.195 | 0.909 | 2.957 |
| TPSG1    | -0.255 | 0.297 | -0.859 | 0.39  | 0.775 | 0.23  | -0.978 | 0.328 | 0.433 | 1.386 |

|          |        |       |        |       |       |       |        |       |       |       |
|----------|--------|-------|--------|-------|-------|-------|--------|-------|-------|-------|
| TPSD1    | -0.441 | 0.306 | -1.441 | 0.15  | 0.643 | 0.197 | -1.811 | 0.07  | 0.353 | 1.172 |
| TPSB2    | -0.754 | 0.315 | -2.394 | 0.017 | 0.47  | 0.148 | -3.575 | 0     | 0.254 | 0.872 |
| TPSAB1   | -0.748 | 0.315 | -2.375 | 0.018 | 0.473 | 0.149 | -3.534 | 0     | 0.255 | 0.877 |
| TPRKB    | 0.499  | 0.303 | 1.648  | 0.099 | 1.647 | 0.499 | 1.298  | 0.194 | 0.91  | 2.981 |
| TPRA1    | -0.255 | 0.296 | -0.859 | 0.39  | 0.775 | 0.23  | -0.979 | 0.328 | 0.434 | 1.386 |
| TPR      | -0.231 | 0.297 | -0.779 | 0.436 | 0.794 | 0.235 | -0.877 | 0.381 | 0.444 | 1.419 |
| TPPP3    | -0.523 | 0.306 | -1.709 | 0.087 | 0.593 | 0.181 | -2.245 | 0.025 | 0.326 | 1.08  |
| TPPP     | -0.039 | 0.298 | -0.131 | 0.895 | 0.962 | 0.286 | -0.134 | 0.893 | 0.537 | 1.723 |
| TPP2     | 0.207  | 0.298 | 0.696  | 0.486 | 1.23  | 0.366 | 0.629  | 0.529 | 0.687 | 2.205 |
| TPP1     | -0.568 | 0.303 | -1.877 | 0.061 | 0.567 | 0.172 | -2.527 | 0.012 | 0.313 | 1.026 |
| TPO      | -0.192 | 0.298 | -0.644 | 0.52  | 0.826 | 0.246 | -0.71  | 0.478 | 0.461 | 1.48  |
| TPMT     | -0.125 | 0.296 | -0.424 | 0.672 | 0.882 | 0.261 | -0.451 | 0.652 | 0.494 | 1.576 |
| TPM4     | -0.377 | 0.3   | -1.255 | 0.209 | 0.686 | 0.206 | -1.525 | 0.127 | 0.381 | 1.236 |
| TPM3     | -0.248 | 0.298 | -0.832 | 0.405 | 0.781 | 0.232 | -0.944 | 0.345 | 0.436 | 1.399 |
| TPM2     | 0.017  | 0.295 | 0.057  | 0.955 | 1.017 | 0.3   | 0.056  | 0.955 | 0.57  | 1.814 |
| TPM1     | -0.389 | 0.3   | -1.296 | 0.195 | 0.678 | 0.203 | -1.584 | 0.113 | 0.377 | 1.22  |
| TPK1     | -0.101 | 0.295 | -0.342 | 0.732 | 0.904 | 0.267 | -0.36  | 0.719 | 0.507 | 1.613 |
| TPI1     | 0.561  | 0.302 | 1.854  | 0.064 | 1.752 | 0.53  | 1.42   | 0.156 | 0.969 | 3.168 |
| TPH1     | -0.125 | 0.296 | -0.423 | 0.673 | 0.882 | 0.261 | -0.45  | 0.653 | 0.494 | 1.577 |
| TPGS2    | -0.024 | 0.297 | -0.081 | 0.935 | 0.976 | 0.29  | -0.082 | 0.934 | 0.546 | 1.746 |
| TPD52L2  | -0.063 | 0.295 | -0.213 | 0.831 | 0.939 | 0.277 | -0.22  | 0.826 | 0.526 | 1.675 |
| TPD52L1  | 0.828  | 0.315 | 2.629  | 0.009 | 2.288 | 0.72  | 1.788  | 0.074 | 1.234 | 4.239 |
| TPD52    | 0.367  | 0.298 | 1.231  | 0.218 | 1.443 | 0.43  | 1.03   | 0.303 | 0.805 | 2.587 |
| TPCN1    | -0.125 | 0.296 | -0.423 | 0.672 | 0.882 | 0.261 | -0.45  | 0.652 | 0.494 | 1.576 |
| TPBG     | -0.455 | 0.303 | -1.503 | 0.133 | 0.635 | 0.192 | -1.903 | 0.057 | 0.351 | 1.148 |
| TP73-AS1 | -0.452 | 0.3   | -1.509 | 0.131 | 0.636 | 0.191 | -1.908 | 0.056 | 0.354 | 1.145 |
| TP73     | 0.329  | 0.298 | 1.107  | 0.268 | 1.39  | 0.414 | 0.943  | 0.346 | 0.776 | 2.491 |
| TP63     | -0.693 | 0.306 | -2.262 | 0.024 | 0.5   | 0.153 | -3.263 | 0.001 | 0.274 | 0.912 |
| TP53TG5  | 0.459  | 0.299 | 1.537  | 0.124 | 1.583 | 0.473 | 1.232  | 0.218 | 0.881 | 2.843 |
| TP53TG1  | -0.134 | 0.295 | -0.452 | 0.651 | 0.875 | 0.259 | -0.484 | 0.628 | 0.49  | 1.561 |
| TP53I3   | -0.373 | 0.3   | -1.242 | 0.214 | 0.689 | 0.207 | -1.506 | 0.132 | 0.383 | 1.24  |
| TP53I11  | -0.365 | 0.3   | -1.218 | 0.223 | 0.694 | 0.208 | -1.47  | 0.142 | 0.385 | 1.249 |
| TP53BP2  | -0.135 | 0.296 | -0.456 | 0.648 | 0.874 | 0.259 | -0.489 | 0.625 | 0.489 | 1.561 |
| TP53BP1  | 0.056  | 0.296 | 0.189  | 0.85  | 1.058 | 0.313 | 0.184  | 0.854 | 0.593 | 1.887 |
| TP53AIP1 | -0.386 | 0.298 | -1.293 | 0.196 | 0.68  | 0.203 | -1.578 | 0.115 | 0.379 | 1.22  |
| TP53     | -0.163 | 0.295 | -0.553 | 0.58  | 0.849 | 0.251 | -0.601 | 0.548 | 0.476 | 1.515 |
| TOX4     | 0.164  | 0.295 | 0.557  | 0.578 | 1.179 | 0.348 | 0.513  | 0.608 | 0.661 | 2.103 |
| TOX3     | -0.185 | 0.296 | -0.623 | 0.533 | 0.831 | 0.246 | -0.684 | 0.494 | 0.465 | 1.486 |

|          |        |       |        |       |       |       |        |       |       |       |
|----------|--------|-------|--------|-------|-------|-------|--------|-------|-------|-------|
| TOX      | -0.055 | 0.295 | -0.187 | 0.852 | 0.946 | 0.279 | -0.192 | 0.848 | 0.53  | 1.688 |
| TOR4A    | 0.296  | 0.298 | 0.993  | 0.321 | 1.344 | 0.4   | 0.86   | 0.39  | 0.75  | 2.41  |
| TOR3A    | 0.593  | 0.302 | 1.962  | 0.05  | 1.81  | 0.548 | 1.48   | 0.139 | 1.001 | 3.275 |
| TOR1B    | 0.969  | 0.321 | 3.017  | 0.003 | 2.636 | 0.847 | 1.932  | 0.053 | 1.404 | 4.949 |
| TOR1AIP2 | 0.566  | 0.306 | 1.851  | 0.064 | 1.761 | 0.539 | 1.413  | 0.158 | 0.967 | 3.208 |
| TOR1AIP1 | -0.325 | 0.298 | -1.091 | 0.275 | 0.723 | 0.215 | -1.289 | 0.197 | 0.403 | 1.295 |
| TOR1A    | -0.083 | 0.296 | -0.282 | 0.778 | 0.92  | 0.272 | -0.294 | 0.769 | 0.516 | 1.642 |
| TOPORS   | -0.368 | 0.302 | -1.218 | 0.223 | 0.692 | 0.209 | -1.473 | 0.141 | 0.382 | 1.251 |
| TOPBP1   | 0.529  | 0.302 | 1.749  | 0.08  | 1.697 | 0.513 | 1.358  | 0.174 | 0.938 | 3.069 |
| TOP3B    | -0.733 | 0.315 | -2.33  | 0.02  | 0.48  | 0.151 | -3.438 | 0.001 | 0.259 | 0.89  |
| TOP3A    | 0.293  | 0.296 | 0.987  | 0.324 | 1.34  | 0.397 | 0.856  | 0.392 | 0.749 | 2.395 |
| TOP2B    | -0.391 | 0.3   | -1.302 | 0.193 | 0.677 | 0.203 | -1.593 | 0.111 | 0.376 | 1.218 |
| TOP2A    | 0.834  | 0.315 | 2.649  | 0.008 | 2.302 | 0.725 | 1.797  | 0.072 | 1.242 | 4.267 |
| TOP1     | 0.075  | 0.297 | 0.253  | 0.8   | 1.078 | 0.32  | 0.244  | 0.807 | 0.603 | 1.928 |
| TONSL    | 0.058  | 0.295 | 0.198  | 0.843 | 1.06  | 0.313 | 0.192  | 0.848 | 0.594 | 1.892 |
| TOMM70   | 0.549  | 0.302 | 1.815  | 0.069 | 1.731 | 0.523 | 1.397  | 0.162 | 0.957 | 3.13  |
| TOMM40   | 0.821  | 0.311 | 2.642  | 0.008 | 2.274 | 0.707 | 1.802  | 0.072 | 1.236 | 4.182 |
| TOMM34   | 0.215  | 0.298 | 0.722  | 0.47  | 1.24  | 0.37  | 0.649  | 0.516 | 0.691 | 2.226 |
| TOMM22   | 0.245  | 0.298 | 0.82   | 0.412 | 1.277 | 0.381 | 0.728  | 0.467 | 0.712 | 2.291 |
| TOMM20   | 0.041  | 0.295 | 0.139  | 0.89  | 1.042 | 0.308 | 0.136  | 0.892 | 0.584 | 1.858 |
| TOM1L2   | -0.443 | 0.3   | -1.477 | 0.14  | 0.642 | 0.192 | -1.858 | 0.063 | 0.357 | 1.156 |
| TOM1L1   | 0.047  | 0.297 | 0.16   | 0.873 | 1.049 | 0.311 | 0.156  | 0.876 | 0.586 | 1.876 |
| TOM1     | -0.198 | 0.296 | -0.668 | 0.504 | 0.82  | 0.243 | -0.739 | 0.46  | 0.459 | 1.466 |
| TOLLIP   | -0.255 | 0.3   | -0.851 | 0.395 | 0.775 | 0.232 | -0.969 | 0.332 | 0.431 | 1.394 |
| TOGARAM1 | -0.754 | 0.315 | -2.395 | 0.017 | 0.471 | 0.148 | -3.575 | 0     | 0.254 | 0.872 |
| TOE1     | -0.124 | 0.297 | -0.417 | 0.677 | 0.884 | 0.262 | -0.444 | 0.657 | 0.494 | 1.581 |
| TOB2     | 0.009  | 0.295 | 0.031  | 0.975 | 1.009 | 0.298 | 0.031  | 0.975 | 0.566 | 1.799 |
| TOB1     | 0.179  | 0.298 | 0.601  | 0.548 | 1.196 | 0.357 | 0.55   | 0.582 | 0.667 | 2.145 |
| TNXB     | 0.482  | 0.303 | 1.591  | 0.112 | 1.619 | 0.49  | 1.263  | 0.207 | 0.894 | 2.93  |
| TNS4     | 0.444  | 0.302 | 1.471  | 0.141 | 1.56  | 0.471 | 1.187  | 0.235 | 0.863 | 2.82  |
| TNS3     | -0.235 | 0.296 | -0.792 | 0.428 | 0.791 | 0.234 | -0.893 | 0.372 | 0.443 | 1.413 |
| TNS2     | -0.536 | 0.306 | -1.754 | 0.079 | 0.585 | 0.179 | -2.321 | 0.02  | 0.321 | 1.065 |
| TNS1     | -0.046 | 0.296 | -0.156 | 0.876 | 0.955 | 0.283 | -0.16  | 0.873 | 0.535 | 1.705 |
| TNRC6B   | 0.057  | 0.295 | 0.193  | 0.847 | 1.059 | 0.313 | 0.188  | 0.851 | 0.593 | 1.889 |
| TNR      | -0.325 | 0.297 | -1.096 | 0.273 | 0.722 | 0.214 | -1.295 | 0.195 | 0.404 | 1.293 |
| TNPO3    | -0.179 | 0.296 | -0.604 | 0.546 | 0.836 | 0.248 | -0.661 | 0.509 | 0.468 | 1.494 |
| TNPO2    | 0.898  | 0.313 | 2.867  | 0.004 | 2.455 | 0.769 | 1.892  | 0.059 | 1.329 | 4.538 |
| TNPO1    | 0.437  | 0.3   | 1.455  | 0.146 | 1.547 | 0.464 | 1.179  | 0.238 | 0.86  | 2.785 |



|          |        |       |        |       |       |       |        |       |       |       |
|----------|--------|-------|--------|-------|-------|-------|--------|-------|-------|-------|
| TNP2     | 0.158  | 0.296 | 0.534  | 0.593 | 1.171 | 0.347 | 0.494  | 0.621 | 0.656 | 2.093 |
| TNP1     | 0.587  | 0.303 | 1.939  | 0.053 | 1.798 | 0.544 | 1.467  | 0.142 | 0.994 | 3.254 |
| TNNT3    | -0.411 | 0.3   | -1.372 | 0.17  | 0.663 | 0.199 | -1.696 | 0.09  | 0.369 | 1.193 |
| TNNT2    | 0.416  | 0.3   | 1.387  | 0.165 | 1.515 | 0.454 | 1.135  | 0.256 | 0.842 | 2.726 |
| TNNT1    | 0.259  | 0.297 | 0.871  | 0.384 | 1.295 | 0.384 | 0.768  | 0.443 | 0.724 | 2.317 |
| TNNI3    | 0.418  | 0.3   | 1.397  | 0.163 | 1.519 | 0.455 | 1.141  | 0.254 | 0.845 | 2.733 |
| TNNI2    | -0.09  | 0.296 | -0.304 | 0.761 | 0.914 | 0.271 | -0.319 | 0.75  | 0.511 | 1.633 |
| TNNI1    | 0.02   | 0.296 | 0.066  | 0.947 | 1.02  | 0.302 | 0.065  | 0.948 | 0.571 | 1.822 |
| TNNC2    | -0.058 | 0.295 | -0.197 | 0.844 | 0.943 | 0.279 | -0.203 | 0.839 | 0.529 | 1.683 |
| TNNC1    | -0.041 | 0.295 | -0.138 | 0.89  | 0.96  | 0.283 | -0.141 | 0.888 | 0.538 | 1.712 |
| TNN      | -0.536 | 0.3   | -1.786 | 0.074 | 0.585 | 0.176 | -2.363 | 0.018 | 0.325 | 1.054 |
| TNMD     | 0.439  | 0.3   | 1.463  | 0.144 | 1.551 | 0.465 | 1.184  | 0.236 | 0.861 | 2.792 |
| TNKS2    | -0.664 | 0.306 | -2.172 | 0.03  | 0.515 | 0.157 | -3.084 | 0.002 | 0.283 | 0.937 |
| TNKS     | -0.643 | 0.31  | -2.076 | 0.038 | 0.526 | 0.163 | -2.912 | 0.004 | 0.287 | 0.965 |
| TNK2     | 0.31   | 0.298 | 1.042  | 0.298 | 1.364 | 0.406 | 0.896  | 0.37  | 0.761 | 2.444 |
| TNK1     | -0.113 | 0.295 | -0.383 | 0.702 | 0.893 | 0.264 | -0.406 | 0.685 | 0.5   | 1.593 |
| TNIP3    | -0.112 | 0.296 | -0.377 | 0.706 | 0.894 | 0.265 | -0.399 | 0.69  | 0.501 | 1.597 |
| TNIP2    | -0.203 | 0.296 | -0.685 | 0.493 | 0.817 | 0.241 | -0.76  | 0.447 | 0.458 | 1.458 |
| TNIP1    | -0.921 | 0.321 | -2.871 | 0.004 | 0.398 | 0.128 | -4.712 | 0     | 0.212 | 0.747 |
| TNIK     | 0.407  | 0.299 | 1.363  | 0.173 | 1.503 | 0.449 | 1.119  | 0.263 | 0.836 | 2.7   |
| TNFSF9   | -0.351 | 0.298 | -1.179 | 0.238 | 0.704 | 0.21  | -1.412 | 0.158 | 0.393 | 1.262 |
| TNFSF8   | -0.385 | 0.298 | -1.289 | 0.197 | 0.681 | 0.203 | -1.572 | 0.116 | 0.379 | 1.222 |
| TNFSF4   | -0.738 | 0.315 | -2.346 | 0.019 | 0.478 | 0.15  | -3.472 | 0.001 | 0.258 | 0.886 |
| TNFSF18  | -0.146 | 0.299 | -0.49  | 0.624 | 0.864 | 0.258 | -0.528 | 0.598 | 0.481 | 1.551 |
| TNFSF15  | 0.462  | 0.302 | 1.528  | 0.126 | 1.587 | 0.48  | 1.224  | 0.221 | 0.878 | 2.87  |
| TNFSF14  | -0.019 | 0.295 | -0.064 | 0.949 | 0.981 | 0.29  | -0.065 | 0.948 | 0.55  | 1.75  |
| TNFSF13  | -0.082 | 0.296 | -0.276 | 0.782 | 0.921 | 0.273 | -0.288 | 0.773 | 0.516 | 1.647 |
| TNFSF11  | -0.082 | 0.296 | -0.277 | 0.782 | 0.921 | 0.272 | -0.289 | 0.773 | 0.516 | 1.644 |
| TNFSF10  | 0.041  | 0.295 | 0.14   | 0.889 | 1.042 | 0.308 | 0.137  | 0.891 | 0.584 | 1.86  |
| TNFRSF9  | -0.188 | 0.296 | -0.635 | 0.525 | 0.829 | 0.245 | -0.698 | 0.485 | 0.464 | 1.479 |
| TNFRSF8  | -0.138 | 0.295 | -0.467 | 0.641 | 0.871 | 0.257 | -0.5   | 0.617 | 0.488 | 1.555 |
| TNFRSF4  | 0.643  | 0.306 | 2.105  | 0.035 | 1.903 | 0.582 | 1.553  | 0.121 | 1.045 | 3.464 |
| TNFRSF25 | -0.625 | 0.304 | -2.053 | 0.04  | 0.535 | 0.163 | -2.853 | 0.004 | 0.295 | 0.972 |
| TNFRSF21 | 0.45   | 0.3   | 1.502  | 0.133 | 1.569 | 0.47  | 1.21   | 0.226 | 0.872 | 2.822 |
| TNFRSF1B | -0.312 | 0.297 | -1.05  | 0.294 | 0.732 | 0.217 | -1.232 | 0.218 | 0.409 | 1.31  |
| TNFRSF1A | -0.62  | 0.304 | -2.041 | 0.041 | 0.538 | 0.163 | -2.829 | 0.005 | 0.296 | 0.976 |
| TNFRSF17 | -0.313 | 0.298 | -1.049 | 0.294 | 0.731 | 0.218 | -1.232 | 0.218 | 0.408 | 1.312 |
| TNFRSF14 | -0.047 | 0.295 | -0.159 | 0.874 | 0.954 | 0.282 | -0.162 | 0.871 | 0.535 | 1.701 |

|            |        |       |        |       |       |       |        |       |       |       |
|------------|--------|-------|--------|-------|-------|-------|--------|-------|-------|-------|
| TNFRSF13B  | -0.32  | 0.298 | -1.075 | 0.283 | 0.726 | 0.216 | -1.267 | 0.205 | 0.405 | 1.302 |
| TNFRSF12A  | 0.455  | 0.3   | 1.516  | 0.13  | 1.575 | 0.472 | 1.218  | 0.223 | 0.875 | 2.836 |
| TNFRSF11B  | -0.463 | 0.303 | -1.531 | 0.126 | 0.629 | 0.19  | -1.947 | 0.052 | 0.348 | 1.139 |
| TNFRSF11A  | 0.461  | 0.3   | 1.54   | 0.124 | 1.586 | 0.475 | 1.234  | 0.217 | 0.882 | 2.854 |
| TNFRSF10D  | 0.012  | 0.295 | 0.04   | 0.968 | 1.012 | 0.299 | 0.04   | 0.968 | 0.568 | 1.804 |
| TNFRSF10C  | 0.418  | 0.298 | 1.402  | 0.161 | 1.519 | 0.453 | 1.146  | 0.252 | 0.847 | 2.725 |
| TNFRSF10B  | 0.212  | 0.296 | 0.714  | 0.475 | 1.236 | 0.366 | 0.643  | 0.52  | 0.691 | 2.208 |
| TNFAIP8    | -0.424 | 0.299 | -1.415 | 0.157 | 0.655 | 0.196 | -1.762 | 0.078 | 0.364 | 1.177 |
| TNFAIP6    | -0.418 | 0.3   | -1.395 | 0.163 | 0.658 | 0.197 | -1.732 | 0.083 | 0.366 | 1.184 |
| TNFAIP3    | 0.149  | 0.296 | 0.504  | 0.614 | 1.161 | 0.344 | 0.468  | 0.64  | 0.65  | 2.076 |
| TNFAIP2    | 0.268  | 0.296 | 0.906  | 0.365 | 1.308 | 0.387 | 0.795  | 0.427 | 0.732 | 2.337 |
| TNFAIP1    | -0.63  | 0.306 | -2.058 | 0.04  | 0.533 | 0.163 | -2.866 | 0.004 | 0.292 | 0.97  |
| TNF        | 0.303  | 0.298 | 1.017  | 0.309 | 1.354 | 0.404 | 0.877  | 0.38  | 0.755 | 2.43  |
| TNC        | 0.268  | 0.298 | 0.9    | 0.368 | 1.307 | 0.389 | 0.79   | 0.43  | 0.729 | 2.343 |
| TMX4       | -0.344 | 0.297 | -1.159 | 0.246 | 0.709 | 0.21  | -1.384 | 0.166 | 0.396 | 1.268 |
| TMX2       | -0.104 | 0.296 | -0.35  | 0.726 | 0.901 | 0.267 | -0.369 | 0.712 | 0.504 | 1.611 |
| TMX1       | 0.196  | 0.296 | 0.663  | 0.507 | 1.217 | 0.36  | 0.602  | 0.547 | 0.681 | 2.175 |
| TMUB2      | 0.117  | 0.296 | 0.395  | 0.693 | 1.124 | 0.332 | 0.373  | 0.709 | 0.63  | 2.006 |
| TMSB4Y     | 0.305  | 0.299 | 1.019  | 0.308 | 1.356 | 0.405 | 0.879  | 0.38  | 0.755 | 2.436 |
| TMSB4X     | 0.149  | 0.296 | 0.503  | 0.615 | 1.16  | 0.344 | 0.467  | 0.641 | 0.649 | 2.074 |
| TMSB10     | 0.773  | 0.315 | 2.458  | 0.014 | 2.167 | 0.682 | 1.712  | 0.087 | 1.17  | 4.016 |
| TMPRSS6    | -0.03  | 0.296 | -0.102 | 0.919 | 0.97  | 0.287 | -0.103 | 0.918 | 0.544 | 1.732 |
| TMPRSS5    | 0.229  | 0.299 | 0.768  | 0.443 | 1.258 | 0.376 | 0.686  | 0.493 | 0.7   | 2.259 |
| TMPRSS4    | 0.201  | 0.295 | 0.682  | 0.495 | 1.223 | 0.361 | 0.618  | 0.537 | 0.686 | 2.182 |
| TMPRSS3    | -0.615 | 0.306 | -2.013 | 0.044 | 0.541 | 0.165 | -2.781 | 0.005 | 0.297 | 0.984 |
| TMPRSS2    | 0.654  | 0.31  | 2.113  | 0.035 | 1.924 | 0.596 | 1.551  | 0.121 | 1.048 | 3.53  |
| TMPRSS15   | 0.568  | 0.306 | 1.857  | 0.063 | 1.764 | 0.539 | 1.417  | 0.156 | 0.969 | 3.212 |
| TMPRSS11E  | 0.293  | 0.298 | 0.985  | 0.325 | 1.341 | 0.399 | 0.854  | 0.393 | 0.748 | 2.403 |
| TMPRSS11D  | 0.219  | 0.296 | 0.742  | 0.458 | 1.245 | 0.368 | 0.666  | 0.505 | 0.697 | 2.223 |
| TMPO       | 0.145  | 0.295 | 0.492  | 0.623 | 1.156 | 0.342 | 0.458  | 0.647 | 0.648 | 2.063 |
| TMOD3      | -0.256 | 0.301 | -0.851 | 0.395 | 0.774 | 0.233 | -0.969 | 0.332 | 0.43  | 1.396 |
| TMOD2      | 0.852  | 0.315 | 2.705  | 0.007 | 2.344 | 0.738 | 1.821  | 0.069 | 1.264 | 4.344 |
| TMOD1      | -0.187 | 0.298 | -0.629 | 0.529 | 0.829 | 0.247 | -0.692 | 0.489 | 0.463 | 1.486 |
| TMLHE      | 0.015  | 0.295 | 0.052  | 0.958 | 1.016 | 0.3   | 0.052  | 0.959 | 0.57  | 1.811 |
| TMF1       | -0.24  | 0.297 | -0.81  | 0.418 | 0.786 | 0.233 | -0.915 | 0.36  | 0.439 | 1.407 |
| TMEM9B     | -0.447 | 0.302 | -1.479 | 0.139 | 0.64  | 0.193 | -1.865 | 0.062 | 0.354 | 1.156 |
| TMEM97     | 0.565  | 0.302 | 1.871  | 0.061 | 1.76  | 0.532 | 1.429  | 0.153 | 0.973 | 3.183 |
| TMEM92-AS1 | 0.044  | 0.296 | 0.148  | 0.883 | 1.045 | 0.309 | 0.145  | 0.885 | 0.585 | 1.865 |

|          |        |       |        |       |       |       |        |       |       |       |
|----------|--------|-------|--------|-------|-------|-------|--------|-------|-------|-------|
| TMEM8B   | -0.466 | 0.3   | -1.554 | 0.12  | 0.628 | 0.188 | -1.98  | 0.048 | 0.349 | 1.129 |
| TMEM87A  | -0.862 | 0.315 | -2.738 | 0.006 | 0.422 | 0.133 | -4.345 | 0     | 0.228 | 0.783 |
| TMEM80   | -0.08  | 0.297 | -0.269 | 0.788 | 0.923 | 0.274 | -0.28  | 0.78  | 0.516 | 1.652 |
| TMEM74B  | 0.044  | 0.296 | 0.149  | 0.882 | 1.045 | 0.31  | 0.146  | 0.884 | 0.585 | 1.869 |
| TMEM70   | 0.612  | 0.303 | 2.024  | 0.043 | 1.845 | 0.558 | 1.514  | 0.13  | 1.02  | 3.338 |
| TMEM63A  | -0.078 | 0.295 | -0.264 | 0.792 | 0.925 | 0.273 | -0.275 | 0.784 | 0.518 | 1.65  |
| TMEM62   | -0.246 | 0.298 | -0.825 | 0.409 | 0.782 | 0.233 | -0.936 | 0.349 | 0.436 | 1.402 |
| TMEM59L  | 0.938  | 0.316 | 2.972  | 0.003 | 2.555 | 0.806 | 1.928  | 0.054 | 1.376 | 4.743 |
| TMEM59   | -0.249 | 0.301 | -0.829 | 0.407 | 0.779 | 0.234 | -0.942 | 0.346 | 0.432 | 1.405 |
| TMEM53   | -0.01  | 0.295 | -0.033 | 0.974 | 0.99  | 0.292 | -0.033 | 0.974 | 0.555 | 1.766 |
| TMEM51   | 0.316  | 0.297 | 1.064  | 0.287 | 1.371 | 0.407 | 0.913  | 0.361 | 0.767 | 2.453 |
| TMEM50B  | -0.414 | 0.307 | -1.349 | 0.177 | 0.661 | 0.203 | -1.671 | 0.095 | 0.362 | 1.206 |
| TMEM50A  | -0.933 | 0.321 | -2.911 | 0.004 | 0.393 | 0.126 | -4.811 | 0     | 0.21  | 0.737 |
| TMEM47   | -0.325 | 0.298 | -1.094 | 0.274 | 0.722 | 0.215 | -1.292 | 0.196 | 0.403 | 1.294 |
| TMEM45A  | -0.321 | 0.298 | -1.078 | 0.281 | 0.725 | 0.216 | -1.272 | 0.204 | 0.404 | 1.3   |
| TMEM43   | -0.715 | 0.307 | -2.331 | 0.02  | 0.489 | 0.15  | -3.405 | 0.001 | 0.268 | 0.892 |
| TMEM41B  | -0.125 | 0.296 | -0.421 | 0.674 | 0.883 | 0.261 | -0.449 | 0.654 | 0.494 | 1.577 |
| TMEM40   | 0.68   | 0.31  | 2.196  | 0.028 | 1.974 | 0.611 | 1.593  | 0.111 | 1.076 | 3.623 |
| TMEM39B  | -0.092 | 0.295 | -0.312 | 0.755 | 0.912 | 0.269 | -0.327 | 0.744 | 0.511 | 1.627 |
| TMEM39A  | -0.536 | 0.303 | -1.773 | 0.076 | 0.585 | 0.177 | -2.346 | 0.019 | 0.323 | 1.058 |
| TMEM38B  | -0.404 | 0.3   | -1.346 | 0.178 | 0.668 | 0.2   | -1.659 | 0.097 | 0.371 | 1.202 |
| TMEM35A  | -0.493 | 0.303 | -1.625 | 0.104 | 0.611 | 0.185 | -2.1   | 0.036 | 0.337 | 1.107 |
| TMEM33   | 0.013  | 0.295 | 0.042  | 0.966 | 1.013 | 0.299 | 0.042  | 0.966 | 0.567 | 1.807 |
| TMEM30B  | -0.512 | 0.306 | -1.671 | 0.095 | 0.6   | 0.184 | -2.182 | 0.029 | 0.329 | 1.092 |
| TMEM30A  | -0.287 | 0.297 | -0.965 | 0.334 | 0.751 | 0.223 | -1.118 | 0.264 | 0.419 | 1.344 |
| TMEM268  | -0.247 | 0.298 | -0.827 | 0.408 | 0.781 | 0.233 | -0.938 | 0.348 | 0.436 | 1.402 |
| TMEM267  | 0.527  | 0.3   | 1.756  | 0.079 | 1.694 | 0.509 | 1.365  | 0.172 | 0.941 | 3.052 |
| TMEM260  | -0.174 | 0.296 | -0.589 | 0.556 | 0.84  | 0.248 | -0.643 | 0.52  | 0.471 | 1.5   |
| TMEM259  | -0.443 | 0.306 | -1.448 | 0.148 | 0.642 | 0.197 | -1.822 | 0.068 | 0.352 | 1.17  |
| TMEM258  | 0.158  | 0.296 | 0.535  | 0.593 | 1.172 | 0.347 | 0.494  | 0.621 | 0.655 | 2.095 |
| TMEM255A | -0.169 | 0.297 | -0.57  | 0.569 | 0.844 | 0.251 | -0.621 | 0.534 | 0.471 | 1.511 |
| TMEM254  | -0.606 | 0.306 | -1.983 | 0.047 | 0.545 | 0.167 | -2.727 | 0.006 | 0.3   | 0.993 |
| TMEM251  | -0.207 | 0.298 | -0.694 | 0.488 | 0.813 | 0.242 | -0.771 | 0.441 | 0.453 | 1.458 |
| TMEM248  | 0.036  | 0.295 | 0.121  | 0.903 | 1.036 | 0.306 | 0.119  | 0.905 | 0.581 | 1.848 |
| TMEM243  | -0.058 | 0.295 | -0.197 | 0.844 | 0.944 | 0.278 | -0.203 | 0.839 | 0.529 | 1.682 |
| TMEM242  | 0.018  | 0.295 | 0.062  | 0.95  | 1.019 | 0.301 | 0.062  | 0.951 | 0.571 | 1.816 |
| TMEM238L | 0.17   | 0.295 | 0.576  | 0.564 | 1.186 | 0.35  | 0.53   | 0.596 | 0.665 | 2.115 |
| TMEM231  | 0.012  | 0.295 | 0.04   | 0.968 | 1.012 | 0.299 | 0.039  | 0.969 | 0.567 | 1.805 |

|             |        |       |        |       |       |       |        |       |       |       |
|-------------|--------|-------|--------|-------|-------|-------|--------|-------|-------|-------|
| TMEM230     | -0.633 | 0.306 | -2.069 | 0.039 | 0.531 | 0.162 | -2.886 | 0.004 | 0.291 | 0.967 |
| TMEM223     | 0.317  | 0.298 | 1.064  | 0.287 | 1.373 | 0.409 | 0.912  | 0.362 | 0.766 | 2.463 |
| TMEM222     | -0.228 | 0.298 | -0.767 | 0.443 | 0.796 | 0.237 | -0.861 | 0.389 | 0.444 | 1.426 |
| TMEM214     | -0.351 | 0.297 | -1.183 | 0.237 | 0.704 | 0.209 | -1.417 | 0.156 | 0.393 | 1.259 |
| TMEM212     | 0.466  | 0.3   | 1.552  | 0.121 | 1.594 | 0.479 | 1.24   | 0.215 | 0.885 | 2.871 |
| TMEM209     | 0.171  | 0.296 | 0.577  | 0.564 | 1.186 | 0.351 | 0.531  | 0.596 | 0.664 | 2.117 |
| TMEM208     | 0.603  | 0.306 | 1.971  | 0.049 | 1.827 | 0.559 | 1.48   | 0.139 | 1.003 | 3.326 |
| TMEM204     | -0.34  | 0.298 | -1.142 | 0.254 | 0.712 | 0.212 | -1.36  | 0.174 | 0.397 | 1.276 |
| TMEM19      | -0.182 | 0.297 | -0.614 | 0.539 | 0.833 | 0.247 | -0.674 | 0.5   | 0.466 | 1.491 |
| TMEM187     | 0.001  | 0.298 | 0.004  | 0.997 | 1.001 | 0.298 | 0.004  | 0.997 | 0.558 | 1.795 |
| TMEM186     | 0.065  | 0.295 | 0.22   | 0.826 | 1.067 | 0.315 | 0.213  | 0.831 | 0.599 | 1.903 |
| TMEM185B    | 0.017  | 0.296 | 0.057  | 0.955 | 1.017 | 0.3   | 0.056  | 0.955 | 0.57  | 1.815 |
| TMEM184C    | 0.111  | 0.295 | 0.375  | 0.708 | 1.117 | 0.33  | 0.355  | 0.723 | 0.626 | 1.992 |
| TMEM184B    | -0.06  | 0.295 | -0.203 | 0.839 | 0.942 | 0.278 | -0.21  | 0.834 | 0.528 | 1.68  |
| TMEM177     | 0.656  | 0.303 | 2.166  | 0.03  | 1.926 | 0.583 | 1.588  | 0.112 | 1.064 | 3.487 |
| TMEM176B    | -0.677 | 0.306 | -2.21  | 0.027 | 0.508 | 0.156 | -3.16  | 0.002 | 0.279 | 0.926 |
| TMEM176A    | -0.095 | 0.296 | -0.322 | 0.747 | 0.909 | 0.269 | -0.338 | 0.735 | 0.509 | 1.623 |
| TMEM168     | -0.757 | 0.31  | -2.44  | 0.015 | 0.469 | 0.146 | -3.648 | 0     | 0.255 | 0.862 |
| TMEM165     | 0.634  | 0.306 | 2.075  | 0.038 | 1.886 | 0.577 | 1.536  | 0.124 | 1.036 | 3.434 |
| TMEM161A    | 0.561  | 0.306 | 1.833  | 0.067 | 1.752 | 0.536 | 1.403  | 0.161 | 0.962 | 3.192 |
| TMEM160     | 0.45   | 0.299 | 1.505  | 0.132 | 1.568 | 0.468 | 1.212  | 0.225 | 0.873 | 2.816 |
| TMEM159     | 0.622  | 0.306 | 2.034  | 0.042 | 1.863 | 0.57  | 1.515  | 0.13  | 1.023 | 3.391 |
| TMEM158     | 0.227  | 0.298 | 0.765  | 0.445 | 1.255 | 0.374 | 0.684  | 0.494 | 0.701 | 2.249 |
| TMEM156     | -0.529 | 0.306 | -1.729 | 0.084 | 0.589 | 0.18  | -2.279 | 0.023 | 0.323 | 1.073 |
| TMEM151B    | 0.057  | 0.295 | 0.194  | 0.846 | 1.059 | 0.313 | 0.189  | 0.85  | 0.593 | 1.89  |
| TMEM14B     | 0.516  | 0.302 | 1.705  | 0.088 | 1.675 | 0.506 | 1.332  | 0.183 | 0.926 | 3.029 |
| TMEM14A     | 0.848  | 0.312 | 2.72   | 0.007 | 2.334 | 0.727 | 1.835  | 0.067 | 1.267 | 4.298 |
| TMEM147-AS1 | 0.703  | 0.306 | 2.299  | 0.022 | 2.02  | 0.618 | 1.651  | 0.099 | 1.109 | 3.678 |
| TMEM147     | 0.392  | 0.298 | 1.316  | 0.188 | 1.481 | 0.441 | 1.089  | 0.276 | 0.825 | 2.656 |
| TMEM144     | -0.428 | 0.303 | -1.416 | 0.157 | 0.652 | 0.197 | -1.768 | 0.077 | 0.36  | 1.179 |
| TMEM143     | 0.467  | 0.302 | 1.544  | 0.123 | 1.595 | 0.482 | 1.234  | 0.217 | 0.882 | 2.885 |
| TMEM140     | -0.373 | 0.298 | -1.252 | 0.21  | 0.689 | 0.205 | -1.518 | 0.129 | 0.384 | 1.234 |
| TMEM135     | -0.285 | 0.298 | -0.959 | 0.338 | 0.752 | 0.224 | -1.11  | 0.267 | 0.42  | 1.347 |
| TMEM134     | 0.26   | 0.296 | 0.877  | 0.381 | 1.297 | 0.384 | 0.772  | 0.44  | 0.725 | 2.318 |
| TMEM132A    | 0.54   | 0.306 | 1.768  | 0.077 | 1.716 | 0.524 | 1.366  | 0.172 | 0.943 | 3.123 |
| TMEM131L    | 0.155  | 0.297 | 0.522  | 0.602 | 1.167 | 0.346 | 0.484  | 0.629 | 0.653 | 2.088 |
| TMEM131     | 0.008  | 0.295 | 0.027  | 0.978 | 1.008 | 0.298 | 0.027  | 0.978 | 0.565 | 1.798 |
| TMEM127     | -0.022 | 0.296 | -0.074 | 0.941 | 0.978 | 0.289 | -0.075 | 0.94  | 0.548 | 1.747 |

|          |        |       |        |       |       |       |        |       |       |       |
|----------|--------|-------|--------|-------|-------|-------|--------|-------|-------|-------|
| TMEM126B | -0.168 | 0.296 | -0.568 | 0.57  | 0.845 | 0.25  | -0.619 | 0.536 | 0.473 | 1.509 |
| TMEM123  | -0.043 | 0.296 | -0.144 | 0.886 | 0.958 | 0.284 | -0.147 | 0.883 | 0.536 | 1.712 |
| TMEM121  | -0.163 | 0.298 | -0.547 | 0.584 | 0.849 | 0.253 | -0.595 | 0.552 | 0.473 | 1.524 |
| TMEM120B | 0.12   | 0.295 | 0.406  | 0.685 | 1.127 | 0.333 | 0.383  | 0.702 | 0.632 | 2.011 |
| TMEM115  | -0.652 | 0.31  | -2.103 | 0.035 | 0.521 | 0.162 | -2.965 | 0.003 | 0.284 | 0.957 |
| TMEM11   | 0.939  | 0.321 | 2.928  | 0.003 | 2.557 | 0.82  | 1.899  | 0.058 | 1.364 | 4.794 |
| TMEM109  | -0.209 | 0.296 | -0.705 | 0.481 | 0.812 | 0.241 | -0.784 | 0.433 | 0.454 | 1.451 |
| TMEM106C | 0.429  | 0.3   | 1.431  | 0.152 | 1.536 | 0.46  | 1.164  | 0.245 | 0.853 | 2.763 |
| TMEM106B | 0.091  | 0.295 | 0.31   | 0.757 | 1.096 | 0.324 | 0.296  | 0.767 | 0.614 | 1.955 |
| TMEM104  | 0.813  | 0.315 | 2.584  | 0.01  | 2.255 | 0.709 | 1.769  | 0.077 | 1.217 | 4.177 |
| TMEM100  | -0.201 | 0.296 | -0.678 | 0.498 | 0.818 | 0.242 | -0.751 | 0.453 | 0.458 | 1.462 |
| TMED9    | 0.04   | 0.298 | 0.136  | 0.892 | 1.041 | 0.31  | 0.133  | 0.894 | 0.581 | 1.865 |
| TMED5    | -0.451 | 0.303 | -1.492 | 0.136 | 0.637 | 0.193 | -1.886 | 0.059 | 0.352 | 1.152 |
| TMED3    | -0.459 | 0.3   | -1.531 | 0.126 | 0.632 | 0.189 | -1.943 | 0.052 | 0.351 | 1.137 |
| TMED2    | -0.277 | 0.299 | -0.925 | 0.355 | 0.758 | 0.227 | -1.066 | 0.286 | 0.422 | 1.363 |
| TMED10   | -0.375 | 0.3   | -1.25  | 0.211 | 0.688 | 0.206 | -1.516 | 0.13  | 0.382 | 1.237 |
| TMED1    | 0.555  | 0.302 | 1.838  | 0.066 | 1.741 | 0.525 | 1.411  | 0.158 | 0.964 | 3.146 |
| TMCO6    | 0.402  | 0.298 | 1.351  | 0.177 | 1.495 | 0.445 | 1.112  | 0.266 | 0.834 | 2.679 |
| TMCO3    | -0.556 | 0.306 | -1.818 | 0.069 | 0.574 | 0.175 | -2.431 | 0.015 | 0.315 | 1.044 |
| TMCO1    | -0.182 | 0.296 | -0.613 | 0.54  | 0.834 | 0.247 | -0.672 | 0.501 | 0.466 | 1.491 |
| TMCC2    | 0.08   | 0.296 | 0.272  | 0.786 | 1.084 | 0.32  | 0.261  | 0.794 | 0.607 | 1.934 |
| TMCC1    | 0.512  | 0.302 | 1.692  | 0.091 | 1.668 | 0.504 | 1.325  | 0.185 | 0.922 | 3.017 |
| TMC7     | -0.119 | 0.296 | -0.401 | 0.688 | 0.888 | 0.263 | -0.426 | 0.67  | 0.497 | 1.587 |
| TMC6     | 0.137  | 0.296 | 0.462  | 0.644 | 1.146 | 0.339 | 0.432  | 0.666 | 0.642 | 2.046 |
| TMC5     | -0.955 | 0.321 | -2.977 | 0.003 | 0.385 | 0.123 | -4.982 | 0     | 0.205 | 0.722 |
| TMBIM6   | -0.283 | 0.3   | -0.945 | 0.345 | 0.753 | 0.226 | -1.092 | 0.275 | 0.419 | 1.356 |
| TMBIM4   | -0.599 | 0.303 | -1.977 | 0.048 | 0.549 | 0.166 | -2.708 | 0.007 | 0.303 | 0.995 |
| TMA7     | 0.64   | 0.306 | 2.091  | 0.037 | 1.896 | 0.58  | 1.544  | 0.123 | 1.041 | 3.455 |
| TMA16    | 0.762  | 0.31  | 2.459  | 0.014 | 2.143 | 0.664 | 1.721  | 0.085 | 1.167 | 3.934 |
| TM9SF4   | -0.291 | 0.297 | -0.98  | 0.327 | 0.747 | 0.222 | -1.138 | 0.255 | 0.418 | 1.338 |
| TM9SF3   | 0.125  | 0.295 | 0.425  | 0.671 | 1.134 | 0.335 | 0.399  | 0.69  | 0.636 | 2.022 |
| TM9SF2   | -0.682 | 0.31  | -2.202 | 0.028 | 0.506 | 0.157 | -3.157 | 0.002 | 0.276 | 0.928 |
| TM9SF1   | -0.224 | 0.297 | -0.752 | 0.452 | 0.799 | 0.238 | -0.843 | 0.399 | 0.446 | 1.432 |
| TM7SF3   | 0.017  | 0.296 | 0.058  | 0.953 | 1.017 | 0.301 | 0.058  | 0.954 | 0.57  | 1.817 |
| TM7SF2   | 0.026  | 0.295 | 0.089  | 0.929 | 1.027 | 0.303 | 0.088  | 0.93  | 0.576 | 1.83  |
| TM6SF2   | 0.066  | 0.295 | 0.224  | 0.823 | 1.068 | 0.315 | 0.217  | 0.828 | 0.599 | 1.906 |
| TM6SF1   | -0.976 | 0.321 | -3.04  | 0.002 | 0.377 | 0.121 | -5.151 | 0     | 0.201 | 0.707 |
| TM4SF5   | 0.085  | 0.295 | 0.287  | 0.774 | 1.088 | 0.322 | 0.275  | 0.783 | 0.61  | 1.942 |

|         |        |       |        |       |       |       |        |       |       |       |
|---------|--------|-------|--------|-------|-------|-------|--------|-------|-------|-------|
| TM4SF4  | 0.203  | 0.296 | 0.684  | 0.494 | 1.225 | 0.363 | 0.619  | 0.536 | 0.685 | 2.189 |
| TM4SF20 | -0.02  | 0.296 | -0.069 | 0.945 | 0.98  | 0.29  | -0.07  | 0.945 | 0.549 | 1.75  |
| TM4SF1  | 0.119  | 0.295 | 0.402  | 0.688 | 1.126 | 0.333 | 0.379  | 0.705 | 0.631 | 2.009 |
| TM2D3   | -0.21  | 0.296 | -0.708 | 0.479 | 0.811 | 0.24  | -0.788 | 0.431 | 0.454 | 1.449 |
| TM2D1   | -0.187 | 0.296 | -0.633 | 0.527 | 0.829 | 0.246 | -0.696 | 0.487 | 0.464 | 1.482 |
| TLX3    | -0.008 | 0.295 | -0.026 | 0.979 | 0.992 | 0.293 | -0.026 | 0.979 | 0.556 | 1.77  |
| TLX2    | 0.245  | 0.297 | 0.827  | 0.408 | 1.278 | 0.379 | 0.733  | 0.463 | 0.715 | 2.285 |
| TLX1    | 0.239  | 0.296 | 0.806  | 0.42  | 1.269 | 0.376 | 0.717  | 0.473 | 0.711 | 2.267 |
| TLR8    | -0.249 | 0.301 | -0.827 | 0.409 | 0.78  | 0.235 | -0.938 | 0.348 | 0.432 | 1.406 |
| TLR7    | -0.567 | 0.306 | -1.856 | 0.063 | 0.567 | 0.173 | -2.498 | 0.012 | 0.312 | 1.032 |
| TLR6    | 0.01   | 0.295 | 0.035  | 0.972 | 1.01  | 0.298 | 0.034  | 0.972 | 0.567 | 1.802 |
| TLR5    | -0.12  | 0.297 | -0.403 | 0.687 | 0.887 | 0.264 | -0.428 | 0.669 | 0.496 | 1.588 |
| TLR4    | -0.612 | 0.306 | -2     | 0.045 | 0.542 | 0.166 | -2.759 | 0.006 | 0.298 | 0.988 |
| TLR3    | -0.481 | 0.3   | -1.606 | 0.108 | 0.618 | 0.185 | -2.063 | 0.039 | 0.344 | 1.112 |
| TLR2    | -0.386 | 0.302 | -1.277 | 0.202 | 0.68  | 0.206 | -1.559 | 0.119 | 0.376 | 1.229 |
| TLR1    | -0.126 | 0.296 | -0.424 | 0.671 | 0.882 | 0.261 | -0.452 | 0.651 | 0.493 | 1.576 |
| TLN2    | -0.062 | 0.296 | -0.21  | 0.834 | 0.94  | 0.278 | -0.217 | 0.828 | 0.527 | 1.677 |
| TLN1    | -0.099 | 0.295 | -0.335 | 0.737 | 0.906 | 0.267 | -0.352 | 0.725 | 0.508 | 1.616 |
| TLL2    | -0.198 | 0.296 | -0.668 | 0.504 | 0.821 | 0.243 | -0.738 | 0.46  | 0.459 | 1.466 |
| TLL1    | 0.466  | 0.301 | 1.547  | 0.122 | 1.593 | 0.48  | 1.236  | 0.216 | 0.883 | 2.875 |
| TLK2    | 0.118  | 0.295 | 0.4    | 0.689 | 1.125 | 0.332 | 0.377  | 0.706 | 0.631 | 2.008 |
| TLK1    | -0.463 | 0.3   | -1.546 | 0.122 | 0.629 | 0.189 | -1.967 | 0.049 | 0.35  | 1.132 |
| TLE6    | 0.137  | 0.295 | 0.464  | 0.643 | 1.147 | 0.339 | 0.433  | 0.665 | 0.643 | 2.045 |
| TLE5    | -0.139 | 0.297 | -0.467 | 0.641 | 0.87  | 0.259 | -0.5   | 0.617 | 0.486 | 1.559 |
| TLE4    | -0.081 | 0.295 | -0.276 | 0.783 | 0.922 | 0.272 | -0.287 | 0.774 | 0.517 | 1.644 |
| TLE3    | -0.495 | 0.3   | -1.652 | 0.099 | 0.609 | 0.183 | -2.138 | 0.032 | 0.338 | 1.097 |
| TLE2    | 0.178  | 0.297 | 0.602  | 0.547 | 1.195 | 0.355 | 0.551  | 0.582 | 0.668 | 2.138 |
| TLE1    | 0.481  | 0.306 | 1.57   | 0.116 | 1.617 | 0.495 | 1.247  | 0.212 | 0.888 | 2.946 |
| TLCD3A  | 0.16   | 0.295 | 0.54   | 0.589 | 1.173 | 0.346 | 0.5    | 0.617 | 0.658 | 2.093 |
| TKTL1   | -0.01  | 0.296 | -0.032 | 0.974 | 0.99  | 0.293 | -0.032 | 0.974 | 0.555 | 1.768 |
| TKT     | -0.206 | 0.297 | -0.693 | 0.488 | 0.814 | 0.242 | -0.77  | 0.442 | 0.454 | 1.458 |
| TKFC    | -0.34  | 0.298 | -1.14  | 0.254 | 0.712 | 0.212 | -1.357 | 0.175 | 0.397 | 1.277 |
| TK2     | 0.129  | 0.296 | 0.435  | 0.664 | 1.137 | 0.336 | 0.408  | 0.683 | 0.637 | 2.031 |
| TK1     | 0.874  | 0.315 | 2.778  | 0.005 | 2.397 | 0.754 | 1.852  | 0.064 | 1.294 | 4.442 |
| TJP3    | 0.139  | 0.296 | 0.471  | 0.638 | 1.15  | 0.34  | 0.439  | 0.66  | 0.643 | 2.054 |
| TJP2    | 0.539  | 0.303 | 1.779  | 0.075 | 1.714 | 0.519 | 1.376  | 0.169 | 0.947 | 3.101 |
| TJP1    | -0.428 | 0.3   | -1.427 | 0.153 | 0.652 | 0.195 | -1.781 | 0.075 | 0.362 | 1.173 |
| TJAP1   | 0.791  | 0.315 | 2.51   | 0.012 | 2.205 | 0.695 | 1.735  | 0.083 | 1.189 | 4.088 |

|          |        |       |        |       |       |       |        |       |       |       |
|----------|--------|-------|--------|-------|-------|-------|--------|-------|-------|-------|
| TIPRL    | 0.209  | 0.296 | 0.707  | 0.48  | 1.233 | 0.365 | 0.638  | 0.524 | 0.69  | 2.203 |
| TIPIN    | 0.526  | 0.3   | 1.752  | 0.08  | 1.692 | 0.508 | 1.362  | 0.173 | 0.939 | 3.047 |
| TIPARP   | -0.13  | 0.295 | -0.441 | 0.659 | 0.878 | 0.259 | -0.471 | 0.638 | 0.492 | 1.566 |
| TINF2    | -0.375 | 0.302 | -1.242 | 0.214 | 0.687 | 0.208 | -1.507 | 0.132 | 0.38  | 1.243 |
| TINAGL1  | 0.486  | 0.302 | 1.607  | 0.108 | 1.625 | 0.491 | 1.273  | 0.203 | 0.899 | 2.939 |
| TIMP4    | -0.014 | 0.295 | -0.048 | 0.962 | 0.986 | 0.291 | -0.048 | 0.961 | 0.553 | 1.759 |
| TIMP3    | -0.84  | 0.311 | -2.697 | 0.007 | 0.432 | 0.134 | -4.226 | 0     | 0.234 | 0.795 |
| TIMP2    | 0.5    | 0.3   | 1.665  | 0.096 | 1.649 | 0.495 | 1.31   | 0.19  | 0.915 | 2.97  |
| TIMP1    | -0.514 | 0.303 | -1.697 | 0.09  | 0.598 | 0.181 | -2.218 | 0.027 | 0.331 | 1.083 |
| TIMM9    | 0.564  | 0.306 | 1.847  | 0.065 | 1.759 | 0.537 | 1.412  | 0.158 | 0.966 | 3.201 |
| TIMM8B   | 0.166  | 0.296 | 0.561  | 0.574 | 1.181 | 0.35  | 0.517  | 0.605 | 0.661 | 2.111 |
| TIMM8A   | 0.903  | 0.321 | 2.816  | 0.005 | 2.467 | 0.791 | 1.854  | 0.064 | 1.316 | 4.625 |
| TIMM50   | -0.108 | 0.296 | -0.363 | 0.716 | 0.898 | 0.266 | -0.384 | 0.701 | 0.502 | 1.605 |
| TIMM44   | 0.369  | 0.298 | 1.239  | 0.215 | 1.446 | 0.431 | 1.036  | 0.3   | 0.807 | 2.593 |
| TIMM22   | 0.146  | 0.295 | 0.495  | 0.621 | 1.157 | 0.342 | 0.46   | 0.645 | 0.649 | 2.064 |
| TIMM17B  | 0.395  | 0.299 | 1.322  | 0.186 | 1.484 | 0.443 | 1.092  | 0.275 | 0.826 | 2.665 |
| TIMM17A  | 0.561  | 0.302 | 1.857  | 0.063 | 1.753 | 0.53  | 1.421  | 0.155 | 0.969 | 3.17  |
| TIMM13   | 0.734  | 0.31  | 2.368  | 0.018 | 2.083 | 0.646 | 1.678  | 0.093 | 1.135 | 3.824 |
| TIMM10B  | -0.043 | 0.295 | -0.145 | 0.884 | 0.958 | 0.283 | -0.148 | 0.882 | 0.537 | 1.709 |
| TIMM10   | 0.617  | 0.306 | 2.018  | 0.044 | 1.853 | 0.566 | 1.506  | 0.132 | 1.018 | 3.373 |
| TIMELESS | 0.541  | 0.303 | 1.787  | 0.074 | 1.718 | 0.52  | 1.38   | 0.168 | 0.949 | 3.11  |
| TIGD6    | 0.457  | 0.301 | 1.521  | 0.128 | 1.58  | 0.475 | 1.221  | 0.222 | 0.877 | 2.847 |
| TIGAR    | 0.716  | 0.307 | 2.335  | 0.02  | 2.046 | 0.627 | 1.667  | 0.095 | 1.122 | 3.731 |
| TIE1     | -0.585 | 0.303 | -1.932 | 0.053 | 0.557 | 0.169 | -2.625 | 0.009 | 0.308 | 1.009 |
| TICAM1   | -0.156 | 0.296 | -0.528 | 0.598 | 0.855 | 0.253 | -0.571 | 0.568 | 0.479 | 1.529 |
| TIAM2    | 0.407  | 0.3   | 1.357  | 0.175 | 1.502 | 0.45  | 1.115  | 0.265 | 0.835 | 2.703 |
| TIAM1    | -0.559 | 0.303 | -1.846 | 0.065 | 0.572 | 0.173 | -2.473 | 0.013 | 0.316 | 1.035 |
| TIAL1    | 0.733  | 0.306 | 2.391  | 0.017 | 2.081 | 0.638 | 1.695  | 0.09  | 1.141 | 3.794 |
| TIA1     | -0.102 | 0.296 | -0.343 | 0.732 | 0.903 | 0.268 | -0.361 | 0.718 | 0.505 | 1.615 |
| THYN1    | -0.339 | 0.3   | -1.131 | 0.258 | 0.712 | 0.214 | -1.347 | 0.178 | 0.396 | 1.282 |
| THY1     | -0.33  | 0.298 | -1.11  | 0.267 | 0.719 | 0.214 | -1.315 | 0.188 | 0.401 | 1.288 |
| THUMPD2  | 0.168  | 0.296 | 0.567  | 0.571 | 1.183 | 0.351 | 0.522  | 0.602 | 0.662 | 2.114 |
| THUMPD1  | -0.025 | 0.296 | -0.083 | 0.934 | 0.976 | 0.289 | -0.084 | 0.933 | 0.546 | 1.742 |
| THTPA    | 0.108  | 0.296 | 0.365  | 0.715 | 1.114 | 0.329 | 0.346  | 0.73  | 0.624 | 1.988 |
| THSD7A   | -0.089 | 0.296 | -0.301 | 0.763 | 0.915 | 0.27  | -0.315 | 0.753 | 0.513 | 1.633 |
| THSD4    | -0.165 | 0.298 | -0.553 | 0.58  | 0.848 | 0.252 | -0.601 | 0.548 | 0.473 | 1.52  |
| THRB     | -0.055 | 0.295 | -0.187 | 0.851 | 0.946 | 0.279 | -0.193 | 0.847 | 0.53  | 1.688 |
| THRAP3   | -0.183 | 0.296 | -0.618 | 0.537 | 0.833 | 0.247 | -0.678 | 0.498 | 0.466 | 1.488 |

|           |        |       |        |       |       |       |        |       |       |       |
|-----------|--------|-------|--------|-------|-------|-------|--------|-------|-------|-------|
| THRA      | 0.238  | 0.297 | 0.803  | 0.422 | 1.269 | 0.376 | 0.714  | 0.475 | 0.709 | 2.269 |
| THPO      | -0.188 | 0.296 | -0.633 | 0.527 | 0.829 | 0.246 | -0.697 | 0.486 | 0.464 | 1.481 |
| THOP1     | -0.051 | 0.295 | -0.174 | 0.862 | 0.95  | 0.281 | -0.178 | 0.858 | 0.532 | 1.695 |
| THOC7     | 0.111  | 0.296 | 0.373  | 0.709 | 1.117 | 0.331 | 0.354  | 0.724 | 0.625 | 1.995 |
| THOC6     | 0.162  | 0.296 | 0.547  | 0.584 | 1.176 | 0.348 | 0.505  | 0.614 | 0.658 | 2.102 |
| THOC5     | -0.378 | 0.3   | -1.261 | 0.207 | 0.685 | 0.205 | -1.532 | 0.125 | 0.381 | 1.233 |
| THOC2     | 0.232  | 0.296 | 0.784  | 0.433 | 1.261 | 0.374 | 0.699  | 0.484 | 0.706 | 2.254 |
| THOC1     | 0.239  | 0.296 | 0.807  | 0.42  | 1.27  | 0.376 | 0.717  | 0.473 | 0.71  | 2.27  |
| THNSL2    | -0.328 | 0.3   | -1.093 | 0.274 | 0.721 | 0.216 | -1.294 | 0.196 | 0.4   | 1.297 |
| THNSL1    | 0.042  | 0.295 | 0.141  | 0.888 | 1.043 | 0.308 | 0.138  | 0.89  | 0.585 | 1.859 |
| THG1L     | -0.519 | 0.306 | -1.696 | 0.09  | 0.595 | 0.182 | -2.223 | 0.026 | 0.327 | 1.084 |
| THEMIS2   | -0.119 | 0.296 | -0.404 | 0.686 | 0.887 | 0.262 | -0.429 | 0.668 | 0.497 | 1.584 |
| THEM6     | 0.571  | 0.306 | 1.866  | 0.062 | 1.769 | 0.541 | 1.422  | 0.155 | 0.972 | 3.222 |
| THEG      | -0.36  | 0.298 | -1.21  | 0.226 | 0.698 | 0.208 | -1.456 | 0.145 | 0.389 | 1.25  |
| THBS4     | -0.352 | 0.297 | -1.186 | 0.236 | 0.703 | 0.209 | -1.422 | 0.155 | 0.393 | 1.258 |
| THBS3     | -0.072 | 0.295 | -0.244 | 0.807 | 0.931 | 0.274 | -0.253 | 0.8   | 0.522 | 1.659 |
| THBS2     | -0.331 | 0.298 | -1.112 | 0.266 | 0.718 | 0.214 | -1.319 | 0.187 | 0.401 | 1.287 |
| THBS1     | -0.396 | 0.302 | -1.311 | 0.19  | 0.673 | 0.203 | -1.609 | 0.108 | 0.372 | 1.217 |
| THBD      | 0.04   | 0.297 | 0.134  | 0.893 | 1.041 | 0.309 | 0.131  | 0.895 | 0.581 | 1.863 |
| THAP9-AS1 | 1.069  | 0.324 | 3.304  | 0.001 | 2.913 | 0.942 | 2.03   | 0.042 | 1.545 | 5.492 |
| THAP9     | -0.46  | 0.302 | -1.523 | 0.128 | 0.631 | 0.191 | -1.934 | 0.053 | 0.349 | 1.141 |
| THAP7     | 0.754  | 0.307 | 2.454  | 0.014 | 2.126 | 0.654 | 1.723  | 0.085 | 1.164 | 3.885 |
| THAP4     | -0.427 | 0.302 | -1.411 | 0.158 | 0.653 | 0.197 | -1.76  | 0.078 | 0.361 | 1.181 |
| THAP3     | -0.194 | 0.302 | -0.644 | 0.52  | 0.823 | 0.249 | -0.711 | 0.477 | 0.456 | 1.488 |
| THAP12    | 0.029  | 0.296 | 0.098  | 0.922 | 1.029 | 0.305 | 0.097  | 0.923 | 0.577 | 1.838 |
| THAP11    | 0.247  | 0.296 | 0.832  | 0.405 | 1.28  | 0.379 | 0.738  | 0.461 | 0.716 | 2.287 |
| THAP10    | 0.163  | 0.296 | 0.55   | 0.582 | 1.177 | 0.348 | 0.507  | 0.612 | 0.659 | 2.101 |
| THAP1     | -0.684 | 0.31  | -2.207 | 0.027 | 0.505 | 0.156 | -3.167 | 0.002 | 0.275 | 0.926 |
| THADA     | 0.172  | 0.299 | 0.577  | 0.564 | 1.188 | 0.355 | 0.53   | 0.596 | 0.662 | 2.134 |
| TH        | 0.26   | 0.298 | 0.872  | 0.383 | 1.296 | 0.386 | 0.768  | 0.442 | 0.723 | 2.324 |
| TGS1      | 0.62   | 0.306 | 2.028  | 0.043 | 1.859 | 0.568 | 1.512  | 0.131 | 1.021 | 3.384 |
| TGOLN2    | -0.37  | 0.298 | -1.243 | 0.214 | 0.691 | 0.206 | -1.504 | 0.132 | 0.385 | 1.238 |
| TGM5      | 0.093  | 0.295 | 0.313  | 0.754 | 1.097 | 0.324 | 0.299  | 0.765 | 0.615 | 1.957 |
| TGM4      | 0.114  | 0.295 | 0.386  | 0.7   | 1.121 | 0.331 | 0.365  | 0.715 | 0.628 | 2     |
| TGM3      | -0.032 | 0.295 | -0.108 | 0.914 | 0.969 | 0.286 | -0.11  | 0.912 | 0.543 | 1.728 |
| TGM2      | -0.301 | 0.298 | -1.011 | 0.312 | 0.74  | 0.221 | -1.179 | 0.238 | 0.413 | 1.327 |
| TGM1      | 0.139  | 0.296 | 0.471  | 0.638 | 1.149 | 0.34  | 0.439  | 0.66  | 0.644 | 2.051 |
| TGIF2     | 0.477  | 0.3   | 1.588  | 0.112 | 1.611 | 0.484 | 1.263  | 0.207 | 0.894 | 2.901 |



|          |        |       |        |       |       |       |        |       |       |       |
|----------|--------|-------|--------|-------|-------|-------|--------|-------|-------|-------|
| TGIF1    | 0.046  | 0.296 | 0.156  | 0.876 | 1.047 | 0.309 | 0.152  | 0.879 | 0.587 | 1.869 |
| TGFBRAP1 | -0.153 | 0.296 | -0.516 | 0.606 | 0.858 | 0.254 | -0.558 | 0.577 | 0.48  | 1.533 |
| TGFBR3   | -0.045 | 0.295 | -0.154 | 0.878 | 0.956 | 0.282 | -0.157 | 0.875 | 0.536 | 1.704 |
| TGFBR2   | -0.862 | 0.315 | -2.736 | 0.006 | 0.422 | 0.133 | -4.341 | 0     | 0.228 | 0.783 |
| TGFBR1   | -0.462 | 0.3   | -1.538 | 0.124 | 0.63  | 0.189 | -1.955 | 0.051 | 0.35  | 1.135 |
| TGFBI    | -0.142 | 0.296 | -0.481 | 0.631 | 0.867 | 0.257 | -0.517 | 0.605 | 0.486 | 1.549 |
| TGFB3    | -0.425 | 0.3   | -1.417 | 0.156 | 0.654 | 0.196 | -1.766 | 0.077 | 0.364 | 1.177 |
| TGFB2    | -0.272 | 0.297 | -0.916 | 0.36  | 0.762 | 0.226 | -1.053 | 0.293 | 0.425 | 1.364 |
| TGFB111  | -0.144 | 0.295 | -0.488 | 0.626 | 0.866 | 0.256 | -0.525 | 0.6   | 0.485 | 1.545 |
| TGFB1    | -1.064 | 0.328 | -3.243 | 0.001 | 0.345 | 0.113 | -5.786 | 0     | 0.181 | 0.656 |
| TGFA     | 0.625  | 0.306 | 2.046  | 0.041 | 1.869 | 0.571 | 1.521  | 0.128 | 1.027 | 3.402 |
| TGDS     | -0.22  | 0.296 | -0.741 | 0.459 | 0.803 | 0.238 | -0.829 | 0.407 | 0.449 | 1.435 |
| TG       | -0.528 | 0.301 | -1.752 | 0.08  | 0.59  | 0.178 | -2.308 | 0.021 | 0.327 | 1.065 |
| TFRC     | 0.456  | 0.3   | 1.521  | 0.128 | 1.577 | 0.472 | 1.222  | 0.222 | 0.877 | 2.837 |
| TFR2     | 0.105  | 0.296 | 0.354  | 0.724 | 1.11  | 0.329 | 0.336  | 0.737 | 0.621 | 1.984 |
| TFPT     | 0.043  | 0.297 | 0.145  | 0.885 | 1.044 | 0.311 | 0.142  | 0.887 | 0.583 | 1.87  |
| TFPI2    | 0.099  | 0.295 | 0.334  | 0.738 | 1.104 | 0.326 | 0.318  | 0.75  | 0.619 | 1.969 |
| TFPI     | -0.716 | 0.306 | -2.338 | 0.019 | 0.489 | 0.15  | -3.416 | 0.001 | 0.268 | 0.891 |
| TFIP11   | 0.445  | 0.3   | 1.484  | 0.138 | 1.561 | 0.468 | 1.198  | 0.231 | 0.867 | 2.809 |
| TFG      | 0.378  | 0.3   | 1.263  | 0.207 | 1.46  | 0.437 | 1.051  | 0.293 | 0.812 | 2.626 |
| TFF3     | -0.238 | 0.298 | -0.798 | 0.425 | 0.789 | 0.235 | -0.901 | 0.368 | 0.44  | 1.413 |
| TFF2     | 0.575  | 0.304 | 1.89   | 0.059 | 1.777 | 0.54  | 1.438  | 0.151 | 0.979 | 3.225 |
| TFF1     | -0.201 | 0.296 | -0.679 | 0.497 | 0.818 | 0.242 | -0.752 | 0.452 | 0.458 | 1.461 |
| TFEC     | 0.228  | 0.296 | 0.77   | 0.441 | 1.256 | 0.372 | 0.688  | 0.491 | 0.703 | 2.246 |
| TFEB     | 0.29   | 0.298 | 0.974  | 0.33  | 1.337 | 0.398 | 0.846  | 0.398 | 0.746 | 2.397 |
| TFE3     | -0.282 | 0.296 | -0.953 | 0.341 | 0.754 | 0.224 | -1.101 | 0.271 | 0.422 | 1.348 |
| TFDP3    | 0.451  | 0.301 | 1.498  | 0.134 | 1.569 | 0.472 | 1.206  | 0.228 | 0.87  | 2.829 |
| TFDP2    | 0.302  | 0.298 | 1.014  | 0.311 | 1.352 | 0.402 | 0.875  | 0.382 | 0.755 | 2.423 |
| TFDP1    | 0.392  | 0.298 | 1.315  | 0.189 | 1.48  | 0.442 | 1.088  | 0.277 | 0.825 | 2.656 |
| TFCP2L1  | 0.637  | 0.306 | 2.083  | 0.037 | 1.89  | 0.578 | 1.541  | 0.123 | 1.038 | 3.441 |
| TFCP2    | 0.173  | 0.296 | 0.583  | 0.56  | 1.188 | 0.352 | 0.536  | 0.592 | 0.666 | 2.122 |
| TFB2M    | 0.529  | 0.303 | 1.749  | 0.08  | 1.697 | 0.514 | 1.358  | 0.175 | 0.938 | 3.072 |
| TFB1M    | 0.037  | 0.295 | 0.125  | 0.9   | 1.038 | 0.306 | 0.123  | 0.902 | 0.582 | 1.85  |
| TFAP4    | 0.237  | 0.298 | 0.793  | 0.428 | 1.267 | 0.378 | 0.707  | 0.48  | 0.706 | 2.274 |
| TFAP2C   | 0.275  | 0.301 | 0.915  | 0.36  | 1.317 | 0.396 | 0.8    | 0.424 | 0.73  | 2.374 |
| TFAP2B   | -0.067 | 0.295 | -0.227 | 0.82  | 0.935 | 0.276 | -0.235 | 0.814 | 0.524 | 1.667 |
| TFAP2A   | 0.142  | 0.296 | 0.481  | 0.631 | 1.153 | 0.341 | 0.448  | 0.654 | 0.646 | 2.058 |
| TFAM     | 1.039  | 0.328 | 3.171  | 0.002 | 2.827 | 0.926 | 1.972  | 0.049 | 1.487 | 5.373 |

|         |        |       |        |       |       |       |        |       |       |       |
|---------|--------|-------|--------|-------|-------|-------|--------|-------|-------|-------|
| TF      | -0.147 | 0.295 | -0.496 | 0.62  | 0.864 | 0.255 | -0.535 | 0.593 | 0.484 | 1.541 |
| TEX30   | 0.243  | 0.296 | 0.819  | 0.413 | 1.275 | 0.377 | 0.727  | 0.467 | 0.713 | 2.277 |
| TEX28   | -0.298 | 0.298 | -1     | 0.317 | 0.742 | 0.221 | -1.165 | 0.244 | 0.414 | 1.331 |
| TEX264  | 0.198  | 0.297 | 0.666  | 0.506 | 1.218 | 0.362 | 0.604  | 0.546 | 0.681 | 2.18  |
| TEX261  | -0.17  | 0.297 | -0.573 | 0.567 | 0.844 | 0.25  | -0.624 | 0.533 | 0.472 | 1.509 |
| TEX2    | -0.459 | 0.299 | -1.533 | 0.125 | 0.632 | 0.189 | -1.946 | 0.052 | 0.351 | 1.136 |
| TEX15   | -0.136 | 0.296 | -0.459 | 0.647 | 0.873 | 0.259 | -0.491 | 0.623 | 0.489 | 1.56  |
| TEX14   | -0.453 | 0.306 | -1.48  | 0.139 | 0.636 | 0.195 | -1.872 | 0.061 | 0.349 | 1.158 |
| TEX13B  | -0.167 | 0.296 | -0.565 | 0.572 | 0.846 | 0.251 | -0.615 | 0.539 | 0.473 | 1.512 |
| TEX13A  | 0.638  | 0.306 | 2.086  | 0.037 | 1.893 | 0.579 | 1.542  | 0.123 | 1.039 | 3.449 |
| TEX12   | -0.456 | 0.302 | -1.508 | 0.132 | 0.634 | 0.192 | -1.91  | 0.056 | 0.351 | 1.146 |
| TEX11   | 0.059  | 0.295 | 0.2    | 0.841 | 1.061 | 0.313 | 0.194  | 0.846 | 0.595 | 1.892 |
| TEX10   | 0.085  | 0.3   | 0.282  | 0.778 | 1.089 | 0.327 | 0.271  | 0.787 | 0.604 | 1.961 |
| TET3    | 0.027  | 0.295 | 0.093  | 0.926 | 1.028 | 0.303 | 0.092  | 0.927 | 0.576 | 1.832 |
| TESPA1  | -0.372 | 0.3   | -1.241 | 0.214 | 0.689 | 0.207 | -1.504 | 0.133 | 0.383 | 1.24  |
| TESMIN  | -0.205 | 0.296 | -0.691 | 0.489 | 0.815 | 0.241 | -0.767 | 0.443 | 0.456 | 1.456 |
| TESK2   | 0.028  | 0.295 | 0.096  | 0.924 | 1.029 | 0.304 | 0.094  | 0.925 | 0.577 | 1.835 |
| TESK1   | 0.484  | 0.302 | 1.6    | 0.11  | 1.622 | 0.49  | 1.269  | 0.205 | 0.897 | 2.933 |
| TESC    | -0.165 | 0.296 | -0.556 | 0.578 | 0.848 | 0.251 | -0.605 | 0.545 | 0.475 | 1.515 |
| TES     | -0.662 | 0.304 | -2.183 | 0.029 | 0.516 | 0.156 | -3.096 | 0.002 | 0.284 | 0.935 |
| TERT    | 0.418  | 0.299 | 1.399  | 0.162 | 1.519 | 0.454 | 1.143  | 0.253 | 0.846 | 2.729 |
| TERF2IP | 0.187  | 0.296 | 0.634  | 0.526 | 1.206 | 0.356 | 0.578  | 0.563 | 0.676 | 2.153 |
| TERF2   | 0.233  | 0.296 | 0.787  | 0.431 | 1.262 | 0.374 | 0.702  | 0.483 | 0.707 | 2.256 |
| TERF1   | 0.51   | 0.302 | 1.689  | 0.091 | 1.666 | 0.503 | 1.323  | 0.186 | 0.921 | 3.012 |
| TEP1    | 0.163  | 0.296 | 0.549  | 0.583 | 1.177 | 0.348 | 0.507  | 0.612 | 0.659 | 2.102 |
| TENT5C  | -0.142 | 0.295 | -0.479 | 0.632 | 0.868 | 0.256 | -0.515 | 0.607 | 0.486 | 1.549 |
| TENT5A  | -0.227 | 0.296 | -0.768 | 0.442 | 0.797 | 0.236 | -0.862 | 0.389 | 0.446 | 1.422 |
| TENT4A  | 0.931  | 0.321 | 2.901  | 0.004 | 2.536 | 0.813 | 1.888  | 0.059 | 1.352 | 4.755 |
| TENM4   | -0.472 | 0.302 | -1.56  | 0.119 | 0.624 | 0.189 | -1.993 | 0.046 | 0.345 | 1.128 |
| TENM3   | -0.381 | 0.3   | -1.27  | 0.204 | 0.683 | 0.205 | -1.545 | 0.122 | 0.38  | 1.23  |
| TENM1   | 0.521  | 0.301 | 1.73   | 0.084 | 1.684 | 0.507 | 1.349  | 0.177 | 0.933 | 3.037 |
| TELO2   | 0.447  | 0.302 | 1.48   | 0.139 | 1.564 | 0.473 | 1.194  | 0.233 | 0.865 | 2.828 |
| TEKT2   | 0.528  | 0.301 | 1.756  | 0.079 | 1.696 | 0.51  | 1.364  | 0.172 | 0.941 | 3.058 |
| TEK     | -0.107 | 0.295 | -0.361 | 0.718 | 0.899 | 0.265 | -0.381 | 0.703 | 0.504 | 1.603 |
| TEFM    | 0.146  | 0.296 | 0.494  | 0.622 | 1.157 | 0.343 | 0.459  | 0.646 | 0.648 | 2.068 |
| TEF     | 0.222  | 0.296 | 0.749  | 0.454 | 1.248 | 0.37  | 0.671  | 0.502 | 0.698 | 2.232 |
| TEDC2   | 0.253  | 0.298 | 0.849  | 0.396 | 1.287 | 0.383 | 0.75   | 0.453 | 0.719 | 2.306 |
| TECTA   | -0.414 | 0.3   | -1.381 | 0.167 | 0.661 | 0.198 | -1.71  | 0.087 | 0.367 | 1.19  |

|         |        |       |        |       |       |       |        |       |       |       |
|---------|--------|-------|--------|-------|-------|-------|--------|-------|-------|-------|
| TECR    | -0.292 | 0.3   | -0.974 | 0.33  | 0.747 | 0.224 | -1.131 | 0.258 | 0.415 | 1.344 |
| TECPR2  | -0.079 | 0.296 | -0.267 | 0.789 | 0.924 | 0.273 | -0.278 | 0.781 | 0.518 | 1.649 |
| TEC     | 0.412  | 0.298 | 1.385  | 0.166 | 1.51  | 0.449 | 1.135  | 0.256 | 0.843 | 2.706 |
| TEAD4   | 0.498  | 0.302 | 1.649  | 0.099 | 1.646 | 0.497 | 1.298  | 0.194 | 0.91  | 2.976 |
| TEAD3   | 0.617  | 0.31  | 1.992  | 0.046 | 1.854 | 0.574 | 1.487  | 0.137 | 1.01  | 3.403 |
| TEAD1   | 0.585  | 0.301 | 1.942  | 0.052 | 1.795 | 0.541 | 1.47   | 0.142 | 0.994 | 3.239 |
| TDRKH   | -0.015 | 0.295 | -0.05  | 0.96  | 0.985 | 0.291 | -0.051 | 0.96  | 0.553 | 1.757 |
| TDRD7   | 0.088  | 0.296 | 0.298  | 0.765 | 1.092 | 0.323 | 0.286  | 0.775 | 0.612 | 1.95  |
| TDRD3   | -0.307 | 0.298 | -1.03  | 0.303 | 0.736 | 0.219 | -1.205 | 0.228 | 0.411 | 1.319 |
| TDRD12  | 0.429  | 0.299 | 1.431  | 0.152 | 1.535 | 0.46  | 1.164  | 0.245 | 0.853 | 2.761 |
| TDRD1   | 0.436  | 0.3   | 1.456  | 0.145 | 1.547 | 0.464 | 1.18   | 0.238 | 0.86  | 2.783 |
| TDP2    | 0.079  | 0.295 | 0.266  | 0.79  | 1.082 | 0.319 | 0.256  | 0.798 | 0.606 | 1.93  |
| TDP1    | 0.311  | 0.297 | 1.049  | 0.294 | 1.365 | 0.405 | 0.902  | 0.367 | 0.763 | 2.442 |
| TDO2    | 0.566  | 0.302 | 1.871  | 0.061 | 1.761 | 0.533 | 1.429  | 0.153 | 0.974 | 3.186 |
| TDG     | 0.1    | 0.295 | 0.34   | 0.734 | 1.106 | 0.327 | 0.324  | 0.746 | 0.62  | 1.973 |
| TCTN3   | -0.636 | 0.31  | -2.052 | 0.04  | 0.529 | 0.164 | -2.868 | 0.004 | 0.288 | 0.972 |
| TCTN2   | 0.106  | 0.295 | 0.358  | 0.72  | 1.111 | 0.328 | 0.34   | 0.734 | 0.623 | 1.982 |
| TCTN1   | -0.649 | 0.31  | -2.096 | 0.036 | 0.522 | 0.162 | -2.951 | 0.003 | 0.285 | 0.959 |
| TCTA    | -0.168 | 0.298 | -0.565 | 0.572 | 0.845 | 0.252 | -0.616 | 0.538 | 0.472 | 1.515 |
| TCP11L1 | -0.6   | 0.304 | -1.977 | 0.048 | 0.549 | 0.167 | -2.71  | 0.007 | 0.302 | 0.995 |
| TCP11   | 0.083  | 0.297 | 0.279  | 0.78  | 1.087 | 0.323 | 0.268  | 0.789 | 0.607 | 1.945 |
| TCP10L3 | 0.057  | 0.295 | 0.193  | 0.847 | 1.059 | 0.312 | 0.188  | 0.851 | 0.594 | 1.888 |
| TCP10L  | 0.347  | 0.297 | 1.168  | 0.243 | 1.415 | 0.42  | 0.987  | 0.324 | 0.79  | 2.532 |
| TCOF1   | 0.653  | 0.31  | 2.103  | 0.035 | 1.921 | 0.596 | 1.545  | 0.122 | 1.045 | 3.529 |
| TCN2    | 0.576  | 0.306 | 1.885  | 0.059 | 1.779 | 0.544 | 1.433  | 0.152 | 0.977 | 3.239 |
| TCN1    | -0.013 | 0.295 | -0.045 | 0.964 | 0.987 | 0.291 | -0.045 | 0.964 | 0.553 | 1.76  |
| TCL6    | 0.191  | 0.299 | 0.64   | 0.522 | 1.211 | 0.362 | 0.583  | 0.56  | 0.674 | 2.175 |
| TCL1B   | -0.528 | 0.301 | -1.756 | 0.079 | 0.59  | 0.177 | -2.314 | 0.021 | 0.327 | 1.063 |
| TCL1A   | -0.721 | 0.306 | -2.356 | 0.018 | 0.486 | 0.149 | -3.453 | 0.001 | 0.267 | 0.886 |
| TCIRG1  | -0.107 | 0.297 | -0.362 | 0.718 | 0.898 | 0.266 | -0.382 | 0.703 | 0.502 | 1.606 |
| TCIM    | -0.518 | 0.306 | -1.69  | 0.091 | 0.596 | 0.183 | -2.214 | 0.027 | 0.327 | 1.086 |
| TCHH    | -0.116 | 0.295 | -0.394 | 0.694 | 0.89  | 0.263 | -0.418 | 0.676 | 0.499 | 1.588 |
| TCFL5   | 0.314  | 0.298 | 1.055  | 0.291 | 1.369 | 0.407 | 0.906  | 0.365 | 0.764 | 2.453 |
| TCF7L2  | 0.28   | 0.3   | 0.934  | 0.35  | 1.323 | 0.396 | 0.815  | 0.415 | 0.735 | 2.38  |
| TCF7L1  | 0.398  | 0.303 | 1.316  | 0.188 | 1.489 | 0.451 | 1.085  | 0.278 | 0.823 | 2.696 |
| TCF7    | -0.192 | 0.297 | -0.645 | 0.519 | 0.825 | 0.245 | -0.711 | 0.477 | 0.461 | 1.479 |
| TCF4    | -0.558 | 0.3   | -1.859 | 0.063 | 0.572 | 0.172 | -2.49  | 0.013 | 0.318 | 1.031 |
| TCF3    | 0.231  | 0.297 | 0.777  | 0.437 | 1.26  | 0.375 | 0.694  | 0.488 | 0.703 | 2.258 |

|         |        |       |        |       |       |       |        |       |       |       |
|---------|--------|-------|--------|-------|-------|-------|--------|-------|-------|-------|
| TCF25   | -0.123 | 0.295 | -0.416 | 0.677 | 0.884 | 0.261 | -0.443 | 0.658 | 0.496 | 1.578 |
| TCF21   | 0.654  | 0.303 | 2.155  | 0.031 | 1.923 | 0.583 | 1.582  | 0.114 | 1.061 | 3.485 |
| TCF20   | 0.413  | 0.307 | 1.345  | 0.179 | 1.511 | 0.464 | 1.102  | 0.271 | 0.828 | 2.759 |
| TCF15   | -0.019 | 0.296 | -0.066 | 0.948 | 0.981 | 0.29  | -0.066 | 0.947 | 0.549 | 1.751 |
| TCF12   | -0.549 | 0.304 | -1.809 | 0.071 | 0.577 | 0.175 | -2.41  | 0.016 | 0.318 | 1.047 |
| TCERG1  | 0.598  | 0.306 | 1.958  | 0.05  | 1.819 | 0.556 | 1.473  | 0.141 | 0.999 | 3.311 |
| TCEAL9  | 0.63   | 0.31  | 2.032  | 0.042 | 1.878 | 0.582 | 1.508  | 0.132 | 1.023 | 3.448 |
| TCEAL4  | 0.143  | 0.296 | 0.482  | 0.63  | 1.153 | 0.341 | 0.449  | 0.653 | 0.646 | 2.059 |
| TCEAL2  | 0.574  | 0.306 | 1.879  | 0.06  | 1.776 | 0.543 | 1.429  | 0.153 | 0.976 | 3.232 |
| TCEAL1  | 0.131  | 0.296 | 0.442  | 0.659 | 1.14  | 0.337 | 0.414  | 0.679 | 0.638 | 2.036 |
| TCEA2   | -0.323 | 0.304 | -1.063 | 0.288 | 0.724 | 0.22  | -1.255 | 0.209 | 0.399 | 1.313 |
| TCEA1   | 0.201  | 0.296 | 0.678  | 0.498 | 1.222 | 0.361 | 0.615  | 0.539 | 0.685 | 2.181 |
| TCAP    | 0.736  | 0.31  | 2.376  | 0.017 | 2.088 | 0.647 | 1.682  | 0.093 | 1.138 | 3.834 |
| TCAF1   | 0.009  | 0.295 | 0.031  | 0.975 | 1.009 | 0.298 | 0.031  | 0.975 | 0.566 | 1.8   |
| TBXT    | 0.101  | 0.296 | 0.34   | 0.734 | 1.106 | 0.327 | 0.323  | 0.746 | 0.619 | 1.974 |
| TBXAS1  | -0.344 | 0.303 | -1.136 | 0.256 | 0.709 | 0.215 | -1.356 | 0.175 | 0.392 | 1.283 |
| TBXA2R  | -0.546 | 0.303 | -1.802 | 0.072 | 0.579 | 0.176 | -2.396 | 0.017 | 0.32  | 1.049 |
| TBX6    | -0.158 | 0.296 | -0.535 | 0.593 | 0.854 | 0.252 | -0.58  | 0.562 | 0.478 | 1.524 |
| TBX5    | 0.152  | 0.295 | 0.514  | 0.608 | 1.164 | 0.344 | 0.477  | 0.634 | 0.652 | 2.076 |
| TBX4    | 0.937  | 0.321 | 2.92   | 0.003 | 2.551 | 0.818 | 1.896  | 0.058 | 1.361 | 4.783 |
| TBX3    | -0.483 | 0.3   | -1.608 | 0.108 | 0.617 | 0.185 | -2.067 | 0.039 | 0.343 | 1.111 |
| TBX21   | 0.165  | 0.296 | 0.558  | 0.577 | 1.18  | 0.349 | 0.514  | 0.607 | 0.66  | 2.108 |
| TBX2    | -0.097 | 0.297 | -0.326 | 0.745 | 0.908 | 0.269 | -0.342 | 0.732 | 0.508 | 1.623 |
| TBX19   | 0.332  | 0.3   | 1.109  | 0.267 | 1.394 | 0.418 | 0.944  | 0.345 | 0.775 | 2.509 |
| TBX10   | 0.276  | 0.296 | 0.931  | 0.352 | 1.317 | 0.39  | 0.814  | 0.416 | 0.737 | 2.354 |
| TBX1    | 0.344  | 0.298 | 1.155  | 0.248 | 1.411 | 0.421 | 0.978  | 0.328 | 0.787 | 2.531 |
| TBRG4   | 0.281  | 0.296 | 0.948  | 0.343 | 1.324 | 0.393 | 0.826  | 0.409 | 0.741 | 2.368 |
| TBR1    | 0.056  | 0.295 | 0.189  | 0.85  | 1.057 | 0.312 | 0.184  | 0.854 | 0.593 | 1.885 |
| TBPL1   | 0.441  | 0.302 | 1.459  | 0.145 | 1.554 | 0.47  | 1.18   | 0.238 | 0.86  | 2.81  |
| TBP     | 0.047  | 0.296 | 0.158  | 0.874 | 1.048 | 0.31  | 0.155  | 0.877 | 0.587 | 1.87  |
| TBL3    | 0.283  | 0.298 | 0.949  | 0.342 | 1.327 | 0.395 | 0.827  | 0.408 | 0.74  | 2.377 |
| TBL2    | 0.23   | 0.297 | 0.775  | 0.439 | 1.259 | 0.374 | 0.692  | 0.489 | 0.703 | 2.255 |
| TBL1Y   | 0.645  | 0.306 | 2.11   | 0.035 | 1.906 | 0.583 | 1.555  | 0.12  | 1.047 | 3.47  |
| TBL1XR1 | -0.687 | 0.31  | -2.217 | 0.027 | 0.503 | 0.156 | -3.187 | 0.001 | 0.274 | 0.923 |
| TBL1X   | -0.318 | 0.298 | -1.068 | 0.285 | 0.728 | 0.217 | -1.258 | 0.209 | 0.406 | 1.304 |
| TBKBP1  | -0.174 | 0.296 | -0.589 | 0.556 | 0.84  | 0.248 | -0.643 | 0.52  | 0.471 | 1.5   |
| TBK1    | -0.805 | 0.31  | -2.594 | 0.009 | 0.447 | 0.139 | -3.986 | 0     | 0.243 | 0.821 |
| TBCEL   | 0.169  | 0.296 | 0.571  | 0.568 | 1.184 | 0.35  | 0.525  | 0.6   | 0.663 | 2.113 |

|          |        |       |        |       |       |       |        |       |       |       |
|----------|--------|-------|--------|-------|-------|-------|--------|-------|-------|-------|
| TBCE     | 0.56   | 0.302 | 1.85   | 0.064 | 1.75  | 0.529 | 1.417  | 0.157 | 0.967 | 3.166 |
| TBCD     | 0.552  | 0.303 | 1.823  | 0.068 | 1.737 | 0.526 | 1.401  | 0.161 | 0.959 | 3.144 |
| TBCCD1   | 0.573  | 0.302 | 1.896  | 0.058 | 1.774 | 0.536 | 1.443  | 0.149 | 0.981 | 3.208 |
| TBCC     | 0.237  | 0.297 | 0.799  | 0.424 | 1.268 | 0.376 | 0.712  | 0.477 | 0.709 | 2.267 |
| TBCB     | -0.097 | 0.299 | -0.323 | 0.747 | 0.908 | 0.272 | -0.339 | 0.735 | 0.505 | 1.632 |
| TBCA     | 0.609  | 0.302 | 2.018  | 0.044 | 1.839 | 0.555 | 1.511  | 0.131 | 1.018 | 3.323 |
| TBC1D9B  | -0.353 | 0.298 | -1.186 | 0.236 | 0.702 | 0.209 | -1.422 | 0.155 | 0.392 | 1.259 |
| TBC1D9   | -0.757 | 0.315 | -2.405 | 0.016 | 0.469 | 0.148 | -3.595 | 0     | 0.253 | 0.869 |
| TBC1D8B  | -0.439 | 0.3   | -1.463 | 0.143 | 0.645 | 0.193 | -1.837 | 0.066 | 0.358 | 1.161 |
| TBC1D8   | -0.719 | 0.31  | -2.32  | 0.02  | 0.487 | 0.151 | -3.396 | 0.001 | 0.265 | 0.894 |
| TBC1D5   | -0.302 | 0.298 | -1.016 | 0.31  | 0.739 | 0.22  | -1.187 | 0.235 | 0.412 | 1.324 |
| TBC1D4   | -0.557 | 0.306 | -1.822 | 0.068 | 0.573 | 0.175 | -2.439 | 0.015 | 0.315 | 1.043 |
| TBC1D31  | 0.624  | 0.303 | 2.057  | 0.04  | 1.866 | 0.566 | 1.53   | 0.126 | 1.03  | 3.382 |
| TBC1D30  | -0.093 | 0.296 | -0.314 | 0.753 | 0.911 | 0.27  | -0.329 | 0.742 | 0.51  | 1.628 |
| TBC1D2B  | -0.512 | 0.3   | -1.705 | 0.088 | 0.599 | 0.18  | -2.227 | 0.026 | 0.333 | 1.08  |
| TBC1D29P | -0.454 | 0.303 | -1.502 | 0.133 | 0.635 | 0.192 | -1.901 | 0.057 | 0.351 | 1.149 |
| TBC1D22B | 0.087  | 0.296 | 0.295  | 0.768 | 1.091 | 0.323 | 0.283  | 0.777 | 0.611 | 1.948 |
| TBC1D22A | 0.164  | 0.296 | 0.553  | 0.58  | 1.178 | 0.348 | 0.511  | 0.61  | 0.66  | 2.103 |
| TBC1D2   | -0.106 | 0.296 | -0.359 | 0.72  | 0.899 | 0.267 | -0.379 | 0.705 | 0.503 | 1.607 |
| TBC1D19  | 0.008  | 0.296 | 0.027  | 0.978 | 1.008 | 0.298 | 0.027  | 0.978 | 0.565 | 1.8   |
| TBC1D17  | -0.74  | 0.315 | -2.352 | 0.019 | 0.477 | 0.15  | -3.484 | 0     | 0.257 | 0.884 |
| TBC1D16  | 0.142  | 0.296 | 0.48   | 0.631 | 1.153 | 0.341 | 0.447  | 0.655 | 0.645 | 2.059 |
| TBC1D15  | -0.282 | 0.3   | -0.939 | 0.348 | 0.755 | 0.226 | -1.085 | 0.278 | 0.419 | 1.358 |
| TBC1D13  | 0.385  | 0.3   | 1.284  | 0.199 | 1.469 | 0.44  | 1.066  | 0.287 | 0.817 | 2.643 |
| TBC1D12  | -0.58  | 0.303 | -1.914 | 0.056 | 0.56  | 0.17  | -2.593 | 0.01  | 0.309 | 1.014 |
| TBC1D10B | -0.316 | 0.299 | -1.06  | 0.289 | 0.729 | 0.218 | -1.247 | 0.212 | 0.406 | 1.308 |
| TBC1D1   | -0.531 | 0.302 | -1.757 | 0.079 | 0.588 | 0.178 | -2.319 | 0.02  | 0.325 | 1.063 |
| TAZ      | 0.11   | 0.296 | 0.373  | 0.709 | 1.117 | 0.331 | 0.353  | 0.724 | 0.625 | 1.996 |
| TAX1BP1  | -0.417 | 0.3   | -1.392 | 0.164 | 0.659 | 0.198 | -1.727 | 0.084 | 0.366 | 1.186 |
| TATDN2   | 0.199  | 0.299 | 0.667  | 0.505 | 1.22  | 0.364 | 0.605  | 0.546 | 0.68  | 2.191 |
| TAT      | -0.318 | 0.298 | -1.07  | 0.285 | 0.727 | 0.216 | -1.26  | 0.208 | 0.406 | 1.303 |
| TASP1    | 0.187  | 0.296 | 0.633  | 0.527 | 1.206 | 0.357 | 0.577  | 0.564 | 0.675 | 2.155 |
| TASOR2   | 0.173  | 0.295 | 0.585  | 0.559 | 1.189 | 0.351 | 0.537  | 0.591 | 0.666 | 2.12  |
| TASOR    | -0.271 | 0.298 | -0.909 | 0.363 | 0.763 | 0.227 | -1.044 | 0.296 | 0.425 | 1.368 |
| TASL     | 0.668  | 0.306 | 2.178  | 0.029 | 1.95  | 0.598 | 1.589  | 0.112 | 1.069 | 3.555 |
| TAS2R9   | 0.017  | 0.295 | 0.059  | 0.953 | 1.018 | 0.3   | 0.058  | 0.953 | 0.571 | 1.814 |
| TAS2R8   | 0.425  | 0.299 | 1.424  | 0.154 | 1.53  | 0.457 | 1.16   | 0.246 | 0.852 | 2.748 |
| TAS2R7   | 0.028  | 0.295 | 0.095  | 0.924 | 1.028 | 0.304 | 0.094  | 0.925 | 0.577 | 1.834 |

|         |        |       |        |       |       |       |        |       |       |       |
|---------|--------|-------|--------|-------|-------|-------|--------|-------|-------|-------|
| TAS2R4  | 0.013  | 0.295 | 0.044  | 0.965 | 1.013 | 0.299 | 0.044  | 0.965 | 0.568 | 1.806 |
| TAS2R3  | 0.17   | 0.296 | 0.575  | 0.565 | 1.186 | 0.351 | 0.529  | 0.597 | 0.664 | 2.118 |
| TAS2R16 | 0.082  | 0.295 | 0.278  | 0.781 | 1.086 | 0.321 | 0.267  | 0.79  | 0.608 | 1.937 |
| TAS2R14 | 0.587  | 0.302 | 1.942  | 0.052 | 1.799 | 0.544 | 1.469  | 0.142 | 0.995 | 3.253 |
| TAS2R13 | -0.218 | 0.297 | -0.733 | 0.464 | 0.804 | 0.239 | -0.819 | 0.413 | 0.449 | 1.44  |
| TAS2R10 | -0.486 | 0.302 | -1.609 | 0.108 | 0.615 | 0.186 | -2.072 | 0.038 | 0.34  | 1.112 |
| TAS2R1  | 0.345  | 0.298 | 1.156  | 0.248 | 1.411 | 0.421 | 0.978  | 0.328 | 0.787 | 2.531 |
| TARS1   | 0.246  | 0.296 | 0.832  | 0.405 | 1.279 | 0.378 | 0.738  | 0.461 | 0.716 | 2.284 |
| TARP    | 0.148  | 0.295 | 0.502  | 0.616 | 1.16  | 0.342 | 0.466  | 0.641 | 0.65  | 2.068 |
| TARDBP  | -0.071 | 0.296 | -0.24  | 0.811 | 0.932 | 0.275 | -0.248 | 0.804 | 0.522 | 1.663 |
| TARBP2  | 0.177  | 0.297 | 0.596  | 0.551 | 1.193 | 0.354 | 0.546  | 0.585 | 0.667 | 2.135 |
| TARBP1  | 0.218  | 0.296 | 0.736  | 0.462 | 1.244 | 0.369 | 0.661  | 0.508 | 0.696 | 2.223 |
| TAPT1   | 0.133  | 0.296 | 0.452  | 0.652 | 1.143 | 0.338 | 0.423  | 0.673 | 0.64  | 2.04  |
| TAPBPL  | 0.536  | 0.304 | 1.765  | 0.078 | 1.709 | 0.519 | 1.366  | 0.172 | 0.942 | 3.098 |
| TAPBP   | -0.208 | 0.299 | -0.694 | 0.487 | 0.813 | 0.243 | -0.772 | 0.44  | 0.452 | 1.46  |
| TAP2    | 0.199  | 0.296 | 0.673  | 0.501 | 1.22  | 0.362 | 0.61   | 0.542 | 0.683 | 2.181 |
| TAP1    | 0.131  | 0.296 | 0.442  | 0.658 | 1.14  | 0.337 | 0.414  | 0.679 | 0.638 | 2.034 |
| TAOK3   | 0.038  | 0.295 | 0.13   | 0.896 | 1.039 | 0.307 | 0.128  | 0.898 | 0.583 | 1.854 |
| TAOK2   | -0.065 | 0.295 | -0.222 | 0.825 | 0.937 | 0.277 | -0.229 | 0.819 | 0.525 | 1.671 |
| TAOK1   | 0.321  | 0.298 | 1.08   | 0.28  | 1.379 | 0.411 | 0.923  | 0.356 | 0.769 | 2.472 |
| TANK    | -0.38  | 0.3   | -1.269 | 0.204 | 0.684 | 0.205 | -1.544 | 0.123 | 0.38  | 1.23  |
| TANC2   | 0.518  | 0.303 | 1.712  | 0.087 | 1.679 | 0.508 | 1.336  | 0.181 | 0.928 | 3.038 |
| TALDO1  | 0.67   | 0.303 | 2.213  | 0.027 | 1.955 | 0.592 | 1.613  | 0.107 | 1.08  | 3.54  |
| TAL1    | -0.27  | 0.299 | -0.906 | 0.365 | 0.763 | 0.228 | -1.04  | 0.298 | 0.425 | 1.37  |
| TAGLN3  | 0.079  | 0.297 | 0.265  | 0.791 | 1.082 | 0.321 | 0.255  | 0.799 | 0.605 | 1.936 |
| TAGLN2  | -0.004 | 0.296 | -0.014 | 0.988 | 0.996 | 0.294 | -0.015 | 0.988 | 0.558 | 1.777 |
| TAGLN   | -0.651 | 0.306 | -2.131 | 0.033 | 0.521 | 0.159 | -3.003 | 0.003 | 0.286 | 0.949 |
| TAF9B   | -0.529 | 0.306 | -1.731 | 0.083 | 0.589 | 0.18  | -2.282 | 0.022 | 0.324 | 1.072 |
| TAF7L   | 0.055  | 0.295 | 0.188  | 0.851 | 1.057 | 0.312 | 0.183  | 0.855 | 0.593 | 1.884 |
| TAF7    | -0.204 | 0.296 | -0.689 | 0.491 | 0.815 | 0.242 | -0.764 | 0.445 | 0.456 | 1.457 |
| TAF6L   | 0.182  | 0.296 | 0.614  | 0.539 | 1.2   | 0.356 | 0.561  | 0.575 | 0.671 | 2.145 |
| TAF6    | 0.017  | 0.295 | 0.058  | 0.954 | 1.017 | 0.3   | 0.058  | 0.954 | 0.57  | 1.814 |
| TAF5L   | 0.016  | 0.295 | 0.054  | 0.957 | 1.016 | 0.3   | 0.054  | 0.957 | 0.57  | 1.813 |
| TAF5    | 0.426  | 0.303 | 1.408  | 0.159 | 1.531 | 0.463 | 1.147  | 0.252 | 0.846 | 2.771 |
| TAF4B   | -0.253 | 0.297 | -0.852 | 0.394 | 0.777 | 0.23  | -0.969 | 0.333 | 0.434 | 1.389 |
| TAF4    | 0.434  | 0.303 | 1.432  | 0.152 | 1.543 | 0.468 | 1.162  | 0.245 | 0.852 | 2.796 |
| TAF2    | 0.933  | 0.321 | 2.911  | 0.004 | 2.543 | 0.815 | 1.893  | 0.058 | 1.356 | 4.766 |
| TAF1D   | 0.093  | 0.301 | 0.308  | 0.758 | 1.097 | 0.33  | 0.294  | 0.769 | 0.608 | 1.979 |

|         |        |       |        |       |       |       |        |       |       |       |
|---------|--------|-------|--------|-------|-------|-------|--------|-------|-------|-------|
| TAF1C   | 0.455  | 0.3   | 1.516  | 0.129 | 1.576 | 0.473 | 1.218  | 0.223 | 0.875 | 2.839 |
| TAF1B   | 0.057  | 0.295 | 0.193  | 0.847 | 1.059 | 0.313 | 0.187  | 0.851 | 0.594 | 1.888 |
| TAF1A   | 0.003  | 0.295 | 0.009  | 0.993 | 1.003 | 0.296 | 0.009  | 0.993 | 0.562 | 1.788 |
| TAF15   | 0.333  | 0.298 | 1.119  | 0.263 | 1.395 | 0.416 | 0.951  | 0.341 | 0.778 | 2.502 |
| TAF13   | -0.119 | 0.295 | -0.404 | 0.686 | 0.887 | 0.262 | -0.429 | 0.668 | 0.497 | 1.584 |
| TAF12   | -0.516 | 0.306 | -1.69  | 0.091 | 0.597 | 0.182 | -2.212 | 0.027 | 0.328 | 1.086 |
| TAF11   | 1.159  | 0.336 | 3.449  | 0.001 | 3.185 | 1.07  | 2.042  | 0.041 | 1.649 | 6.154 |
| TAF10   | -0.294 | 0.298 | -0.989 | 0.323 | 0.745 | 0.222 | -1.149 | 0.25  | 0.416 | 1.335 |
| TAF1    | -0.396 | 0.3   | -1.317 | 0.188 | 0.673 | 0.202 | -1.616 | 0.106 | 0.374 | 1.213 |
| TADA3   | -0.569 | 0.307 | -1.856 | 0.064 | 0.566 | 0.174 | -2.5   | 0.012 | 0.31  | 1.033 |
| TADA2A  | 0.572  | 0.306 | 1.869  | 0.062 | 1.771 | 0.542 | 1.424  | 0.154 | 0.973 | 3.225 |
| TACSTD2 | -0.197 | 0.299 | -0.66  | 0.509 | 0.821 | 0.245 | -0.729 | 0.466 | 0.457 | 1.475 |
| TACR3   | 0.096  | 0.296 | 0.323  | 0.746 | 1.1   | 0.325 | 0.308  | 0.758 | 0.616 | 1.964 |
| TACR2   | 0.144  | 0.295 | 0.488  | 0.626 | 1.155 | 0.341 | 0.454  | 0.65  | 0.647 | 2.061 |
| TACR1   | 0.578  | 0.303 | 1.905  | 0.057 | 1.782 | 0.54  | 1.447  | 0.148 | 0.984 | 3.228 |
| TACO1   | 0.689  | 0.306 | 2.249  | 0.025 | 1.992 | 0.61  | 1.625  | 0.104 | 1.093 | 3.63  |
| TACC3   | 0.638  | 0.303 | 2.109  | 0.035 | 1.893 | 0.573 | 1.559  | 0.119 | 1.046 | 3.425 |
| TACC2   | 0.216  | 0.296 | 0.729  | 0.466 | 1.241 | 0.367 | 0.656  | 0.512 | 0.694 | 2.217 |
| TACC1   | -0.869 | 0.315 | -2.758 | 0.006 | 0.42  | 0.132 | -4.393 | 0     | 0.226 | 0.778 |
| TAC3    | -0.202 | 0.296 | -0.683 | 0.495 | 0.817 | 0.242 | -0.757 | 0.449 | 0.457 | 1.46  |
| TAC1    | -0.462 | 0.302 | -1.528 | 0.127 | 0.63  | 0.19  | -1.942 | 0.052 | 0.348 | 1.14  |
| TAB2    | 0.362  | 0.3   | 1.208  | 0.227 | 1.436 | 0.431 | 1.013  | 0.311 | 0.798 | 2.585 |
| TAB1    | 0.939  | 0.321 | 2.93   | 0.003 | 2.559 | 0.82  | 1.9    | 0.057 | 1.365 | 4.796 |
| TAAR5   | 0.286  | 0.297 | 0.966  | 0.334 | 1.332 | 0.395 | 0.84   | 0.401 | 0.745 | 2.381 |
| TAAR3P  | -0.11  | 0.296 | -0.37  | 0.711 | 0.896 | 0.265 | -0.391 | 0.695 | 0.502 | 1.6   |
| TAAR2   | -0.019 | 0.296 | -0.066 | 0.947 | 0.981 | 0.29  | -0.067 | 0.947 | 0.55  | 1.75  |
| SZT2    | -0.506 | 0.301 | -1.68  | 0.093 | 0.603 | 0.182 | -2.186 | 0.029 | 0.334 | 1.088 |
| SZRD1   | 0.355  | 0.3   | 1.186  | 0.236 | 1.427 | 0.427 | 0.998  | 0.318 | 0.793 | 2.566 |
| SYTL2   | -0.014 | 0.295 | -0.046 | 0.963 | 0.987 | 0.291 | -0.046 | 0.963 | 0.553 | 1.76  |
| SYT5    | 0.274  | 0.297 | 0.924  | 0.356 | 1.315 | 0.39  | 0.808  | 0.419 | 0.735 | 2.351 |
| SYT2    | 0.104  | 0.295 | 0.351  | 0.725 | 1.109 | 0.328 | 0.334  | 0.739 | 0.622 | 1.979 |
| SYT17   | -0.282 | 0.298 | -0.948 | 0.343 | 0.754 | 0.225 | -1.095 | 0.273 | 0.421 | 1.352 |
| SYT13   | 0.069  | 0.296 | 0.232  | 0.817 | 1.071 | 0.317 | 0.224  | 0.823 | 0.6   | 1.911 |
| SYT12   | 0.258  | 0.296 | 0.87   | 0.384 | 1.294 | 0.383 | 0.767  | 0.443 | 0.724 | 2.312 |
| SYT11   | -0.719 | 0.31  | -2.322 | 0.02  | 0.487 | 0.151 | -3.398 | 0.001 | 0.266 | 0.894 |
| SYT1    | -0.23  | 0.298 | -0.774 | 0.439 | 0.794 | 0.236 | -0.87  | 0.384 | 0.443 | 1.423 |
| SYPL1   | -0.494 | 0.306 | -1.616 | 0.106 | 0.61  | 0.187 | -2.09  | 0.037 | 0.335 | 1.111 |
| SYP     | -0.254 | 0.298 | -0.853 | 0.394 | 0.776 | 0.231 | -0.971 | 0.332 | 0.432 | 1.391 |

|         |        |       |        |       |       |       |        |       |       |       |
|---------|--------|-------|--------|-------|-------|-------|--------|-------|-------|-------|
| SYNRG   | -0.182 | 0.296 | -0.614 | 0.539 | 0.834 | 0.247 | -0.674 | 0.501 | 0.467 | 1.49  |
| SYNPO2L | -0.125 | 0.296 | -0.422 | 0.673 | 0.883 | 0.262 | -0.449 | 0.653 | 0.494 | 1.578 |
| SYNPO   | -0.507 | 0.302 | -1.676 | 0.094 | 0.602 | 0.182 | -2.183 | 0.029 | 0.333 | 1.09  |
| SYNM    | 0.069  | 0.295 | 0.235  | 0.814 | 1.072 | 0.317 | 0.227  | 0.821 | 0.601 | 1.912 |
| SYNJ2   | 0.208  | 0.296 | 0.703  | 0.482 | 1.231 | 0.364 | 0.635  | 0.526 | 0.69  | 2.197 |
| SYNJ1   | 0.169  | 0.295 | 0.572  | 0.567 | 1.184 | 0.35  | 0.526  | 0.599 | 0.664 | 2.112 |
| SYNGR4  | -0.084 | 0.295 | -0.284 | 0.776 | 0.919 | 0.271 | -0.297 | 0.767 | 0.515 | 1.64  |
| SYNGR3  | 0.092  | 0.296 | 0.312  | 0.755 | 1.097 | 0.325 | 0.298  | 0.766 | 0.614 | 1.959 |
| SYNGR2  | -0.024 | 0.296 | -0.082 | 0.934 | 0.976 | 0.289 | -0.083 | 0.933 | 0.546 | 1.743 |
| SYNGR1  | -0.208 | 0.296 | -0.703 | 0.482 | 0.812 | 0.24  | -0.782 | 0.434 | 0.454 | 1.451 |
| SYNE2   | -0.116 | 0.296 | -0.392 | 0.695 | 0.89  | 0.264 | -0.416 | 0.677 | 0.498 | 1.591 |
| SYNE1   | -1.084 | 0.322 | -3.364 | 0.001 | 0.338 | 0.109 | -6.07  | 0     | 0.18  | 0.636 |
| SYNDIG1 | -0.73  | 0.31  | -2.355 | 0.019 | 0.482 | 0.149 | -3.468 | 0.001 | 0.263 | 0.885 |
| SYNCRIP | 0.118  | 0.296 | 0.398  | 0.691 | 1.125 | 0.333 | 0.375  | 0.707 | 0.629 | 2.011 |
| SYNC    | -0.329 | 0.3   | -1.096 | 0.273 | 0.72  | 0.216 | -1.298 | 0.194 | 0.4   | 1.296 |
| SYN3    | 0.528  | 0.301 | 1.753  | 0.08  | 1.695 | 0.51  | 1.362  | 0.173 | 0.939 | 3.057 |
| SYN2    | 0.08   | 0.297 | 0.271  | 0.787 | 1.084 | 0.322 | 0.26   | 0.795 | 0.606 | 1.939 |
| SYN1    | 0.063  | 0.295 | 0.214  | 0.83  | 1.065 | 0.314 | 0.208  | 0.836 | 0.597 | 1.899 |
| SYMPK   | 0.086  | 0.295 | 0.292  | 0.77  | 1.09  | 0.322 | 0.28   | 0.78  | 0.611 | 1.945 |
| SYK     | 0.125  | 0.297 | 0.421  | 0.674 | 1.133 | 0.336 | 0.396  | 0.692 | 0.633 | 2.027 |
| SYF2    | 0.31   | 0.297 | 1.042  | 0.297 | 1.363 | 0.405 | 0.896  | 0.37  | 0.761 | 2.442 |
| SYDE1   | -0.342 | 0.297 | -1.153 | 0.249 | 0.71  | 0.211 | -1.375 | 0.169 | 0.397 | 1.27  |
| SYCP2   | -0.018 | 0.295 | -0.061 | 0.952 | 0.982 | 0.29  | -0.061 | 0.951 | 0.551 | 1.751 |
| SYCP1   | -0.238 | 0.297 | -0.804 | 0.422 | 0.788 | 0.234 | -0.908 | 0.364 | 0.44  | 1.409 |
| SYCE1L  | -0.262 | 0.296 | -0.884 | 0.377 | 0.77  | 0.228 | -1.01  | 0.312 | 0.431 | 1.376 |
| SYBU    | -0.158 | 0.296 | -0.534 | 0.593 | 0.854 | 0.253 | -0.578 | 0.563 | 0.478 | 1.525 |
| SWAP70  | 0.018  | 0.296 | 0.06   | 0.952 | 1.018 | 0.301 | 0.06   | 0.952 | 0.57  | 1.818 |
| SVIL    | -0.327 | 0.297 | -1.103 | 0.27  | 0.721 | 0.214 | -1.304 | 0.192 | 0.403 | 1.29  |
| SVEP1   | -0.737 | 0.31  | -2.38  | 0.017 | 0.478 | 0.148 | -3.519 | 0     | 0.261 | 0.878 |
| SV2C    | -0.192 | 0.296 | -0.648 | 0.517 | 0.825 | 0.244 | -0.714 | 0.475 | 0.462 | 1.475 |
| SV2B    | 0.289  | 0.298 | 0.969  | 0.333 | 1.335 | 0.398 | 0.842  | 0.4   | 0.744 | 2.395 |
| SV2A    | -0.11  | 0.295 | -0.373 | 0.709 | 0.896 | 0.265 | -0.395 | 0.693 | 0.502 | 1.598 |
| SUZ12P1 | 0.534  | 0.303 | 1.765  | 0.078 | 1.706 | 0.516 | 1.367  | 0.172 | 0.943 | 3.088 |
| SUZ12   | 0.529  | 0.3   | 1.76   | 0.078 | 1.696 | 0.509 | 1.367  | 0.172 | 0.942 | 3.056 |
| SUV39H2 | 0.599  | 0.304 | 1.974  | 0.048 | 1.821 | 0.553 | 1.484  | 0.138 | 1.004 | 3.303 |
| SUV39H1 | 0.281  | 0.298 | 0.942  | 0.346 | 1.324 | 0.395 | 0.821  | 0.412 | 0.738 | 2.375 |
| SUSD6   | -0.783 | 0.31  | -2.525 | 0.012 | 0.457 | 0.142 | -3.831 | 0     | 0.249 | 0.839 |
| SUSD5   | -0.369 | 0.3   | -1.232 | 0.218 | 0.691 | 0.207 | -1.49  | 0.136 | 0.384 | 1.244 |



|         |        |       |        |       |       |       |        |       |       |       |
|---------|--------|-------|--------|-------|-------|-------|--------|-------|-------|-------|
| SUSD4   | 0.149  | 0.296 | 0.504  | 0.614 | 1.161 | 0.344 | 0.468  | 0.64  | 0.649 | 2.076 |
| SURF2   | 0.621  | 0.303 | 2.048  | 0.041 | 1.86  | 0.564 | 1.526  | 0.127 | 1.027 | 3.368 |
| SURF1   | -0.307 | 0.301 | -1.02  | 0.308 | 0.736 | 0.221 | -1.194 | 0.232 | 0.408 | 1.326 |
| SUPV3L1 | 0.034  | 0.295 | 0.116  | 0.907 | 1.035 | 0.306 | 0.114  | 0.909 | 0.58  | 1.847 |
| SUPT7L  | 0.518  | 0.301 | 1.723  | 0.085 | 1.679 | 0.505 | 1.345  | 0.179 | 0.931 | 3.027 |
| SUPT6H  | -0.249 | 0.298 | -0.836 | 0.403 | 0.78  | 0.232 | -0.949 | 0.343 | 0.435 | 1.398 |
| SUPT5H  | 0.091  | 0.295 | 0.309  | 0.757 | 1.096 | 0.323 | 0.295  | 0.768 | 0.614 | 1.954 |
| SUPT4H1 | 0.217  | 0.296 | 0.732  | 0.464 | 1.242 | 0.368 | 0.658  | 0.511 | 0.695 | 2.22  |
| SUPT3H  | -0.066 | 0.297 | -0.224 | 0.823 | 0.936 | 0.278 | -0.231 | 0.817 | 0.523 | 1.674 |
| SUPT20H | -0.177 | 0.296 | -0.598 | 0.55  | 0.838 | 0.248 | -0.654 | 0.513 | 0.469 | 1.497 |
| SUPT16H | 0.021  | 0.296 | 0.07   | 0.944 | 1.021 | 0.303 | 0.07   | 0.944 | 0.571 | 1.825 |
| SUOX    | -0.218 | 0.298 | -0.734 | 0.463 | 0.804 | 0.239 | -0.82  | 0.412 | 0.449 | 1.44  |
| SUN2    | 0.322  | 0.3   | 1.074  | 0.283 | 1.38  | 0.413 | 0.918  | 0.358 | 0.767 | 2.482 |
| SUN1    | 0.475  | 0.302 | 1.571  | 0.116 | 1.608 | 0.486 | 1.25   | 0.211 | 0.889 | 2.907 |
| SUMO4   | 0.503  | 0.302 | 1.663  | 0.096 | 1.654 | 0.5   | 1.307  | 0.191 | 0.914 | 2.991 |
| SUMO3   | 0.128  | 0.295 | 0.432  | 0.666 | 1.136 | 0.336 | 0.405  | 0.685 | 0.637 | 2.027 |
| SUMO1   | 0.616  | 0.31  | 1.986  | 0.047 | 1.852 | 0.574 | 1.483  | 0.138 | 1.008 | 3.401 |
| SULT4A1 | 0.375  | 0.298 | 1.259  | 0.208 | 1.455 | 0.433 | 1.05   | 0.294 | 0.812 | 2.608 |
| SULT2B1 | -0.026 | 0.296 | -0.089 | 0.929 | 0.974 | 0.288 | -0.09  | 0.928 | 0.546 | 1.739 |
| SULT2A1 | -0.064 | 0.295 | -0.215 | 0.829 | 0.938 | 0.277 | -0.222 | 0.824 | 0.526 | 1.674 |
| SULT1E1 | 0.617  | 0.306 | 2.019  | 0.043 | 1.853 | 0.566 | 1.507  | 0.132 | 1.018 | 3.373 |
| SULT1C2 | 0.603  | 0.306 | 1.972  | 0.049 | 1.828 | 0.559 | 1.48   | 0.139 | 1.004 | 3.329 |
| SULT1B1 | -0.137 | 0.296 | -0.461 | 0.645 | 0.872 | 0.259 | -0.494 | 0.621 | 0.488 | 1.559 |
| SULT1A2 | 0.011  | 0.295 | 0.036  | 0.972 | 1.011 | 0.298 | 0.035  | 0.972 | 0.566 | 1.803 |
| SULT1A1 | 0.099  | 0.295 | 0.334  | 0.738 | 1.104 | 0.326 | 0.318  | 0.75  | 0.619 | 1.969 |
| SULF1   | -0.503 | 0.302 | -1.664 | 0.096 | 0.605 | 0.183 | -2.163 | 0.031 | 0.334 | 1.093 |
| SUGP2   | 0.193  | 0.296 | 0.65   | 0.516 | 1.212 | 0.359 | 0.591  | 0.554 | 0.678 | 2.166 |
| SUGP1   | 0.029  | 0.296 | 0.098  | 0.922 | 1.029 | 0.304 | 0.097  | 0.923 | 0.577 | 1.837 |
| SUGCT   | -0.112 | 0.296 | -0.379 | 0.705 | 0.894 | 0.265 | -0.401 | 0.689 | 0.5   | 1.598 |
| SUCO    | 0.137  | 0.295 | 0.464  | 0.643 | 1.147 | 0.339 | 0.434  | 0.665 | 0.643 | 2.046 |
| SUCLG2  | -0.367 | 0.3   | -1.225 | 0.221 | 0.693 | 0.208 | -1.481 | 0.139 | 0.385 | 1.247 |
| SUCLG1  | 0.163  | 0.295 | 0.55   | 0.582 | 1.177 | 0.348 | 0.508  | 0.611 | 0.659 | 2.1   |
| SUCLA2  | -0.05  | 0.297 | -0.169 | 0.866 | 0.951 | 0.282 | -0.174 | 0.862 | 0.532 | 1.702 |
| SUB1    | 0.598  | 0.306 | 1.958  | 0.05  | 1.819 | 0.556 | 1.474  | 0.141 | 1     | 3.311 |
| STYXL1  | -0.08  | 0.296 | -0.272 | 0.786 | 0.923 | 0.273 | -0.283 | 0.777 | 0.517 | 1.647 |
| STYK1   | -0.15  | 0.296 | -0.509 | 0.611 | 0.86  | 0.254 | -0.549 | 0.583 | 0.482 | 1.536 |
| STXBP6  | -0.015 | 0.297 | -0.052 | 0.959 | 0.985 | 0.292 | -0.052 | 0.958 | 0.55  | 1.762 |
| STXBP5L | 0.461  | 0.302 | 1.525  | 0.127 | 1.586 | 0.48  | 1.222  | 0.222 | 0.877 | 2.869 |

|        |        |       |        |       |       |       |        |       |       |       |
|--------|--------|-------|--------|-------|-------|-------|--------|-------|-------|-------|
| STXBP3 | -0.138 | 0.297 | -0.465 | 0.642 | 0.871 | 0.258 | -0.498 | 0.618 | 0.487 | 1.558 |
| STXBP2 | -0.163 | 0.299 | -0.544 | 0.586 | 0.85  | 0.254 | -0.591 | 0.554 | 0.472 | 1.528 |
| STXBP1 | -0.454 | 0.3   | -1.511 | 0.131 | 0.635 | 0.191 | -1.912 | 0.056 | 0.353 | 1.144 |
| STX8   | 0.225  | 0.296 | 0.761  | 0.447 | 1.253 | 0.371 | 0.681  | 0.496 | 0.701 | 2.238 |
| STX7   | -0.438 | 0.3   | -1.464 | 0.143 | 0.645 | 0.193 | -1.837 | 0.066 | 0.359 | 1.16  |
| STX6   | 0.186  | 0.296 | 0.628  | 0.53  | 1.204 | 0.357 | 0.573  | 0.567 | 0.674 | 2.152 |
| STX5   | 0.1    | 0.295 | 0.339  | 0.734 | 1.105 | 0.327 | 0.323  | 0.747 | 0.62  | 1.972 |
| STX4   | -0.307 | 0.296 | -1.037 | 0.3   | 0.735 | 0.218 | -1.214 | 0.225 | 0.411 | 1.315 |
| STX3   | 0.799  | 0.31  | 2.578  | 0.01  | 2.223 | 0.689 | 1.776  | 0.076 | 1.211 | 4.079 |
| STX2   | 0.459  | 0.3   | 1.53   | 0.126 | 1.582 | 0.474 | 1.227  | 0.22  | 0.879 | 2.846 |
| STX1A  | 0.141  | 0.298 | 0.473  | 0.636 | 1.151 | 0.343 | 0.442  | 0.659 | 0.642 | 2.065 |
| STX18  | -0.159 | 0.296 | -0.535 | 0.592 | 0.853 | 0.253 | -0.58  | 0.562 | 0.477 | 1.526 |
| STX17  | 0.527  | 0.306 | 1.723  | 0.085 | 1.694 | 0.518 | 1.339  | 0.18  | 0.93  | 3.084 |
| STX16  | 0.179  | 0.298 | 0.6    | 0.549 | 1.196 | 0.357 | 0.549  | 0.583 | 0.667 | 2.145 |
| STX12  | -0.356 | 0.304 | -1.174 | 0.24  | 0.7   | 0.213 | -1.411 | 0.158 | 0.386 | 1.269 |
| STX11  | 0.083  | 0.295 | 0.281  | 0.778 | 1.087 | 0.321 | 0.27   | 0.787 | 0.609 | 1.938 |
| STX10  | -0.065 | 0.296 | -0.22  | 0.826 | 0.937 | 0.278 | -0.228 | 0.82  | 0.524 | 1.674 |
| STUM   | -0.004 | 0.295 | -0.012 | 0.99  | 0.996 | 0.294 | -0.012 | 0.99  | 0.558 | 1.778 |
| STUB1  | 0.16   | 0.296 | 0.541  | 0.588 | 1.174 | 0.348 | 0.5    | 0.617 | 0.657 | 2.098 |
| STT3A  | 0.172  | 0.296 | 0.58   | 0.562 | 1.187 | 0.352 | 0.533  | 0.594 | 0.664 | 2.122 |
| STS    | -0.06  | 0.295 | -0.205 | 0.838 | 0.941 | 0.278 | -0.211 | 0.833 | 0.528 | 1.679 |
| STRN4  | 0.14   | 0.295 | 0.472  | 0.637 | 1.15  | 0.34  | 0.441  | 0.659 | 0.644 | 2.051 |
| STRN3  | 0.067  | 0.295 | 0.225  | 0.822 | 1.069 | 0.316 | 0.218  | 0.827 | 0.599 | 1.907 |
| STRN   | 0.142  | 0.296 | 0.479  | 0.632 | 1.152 | 0.341 | 0.447  | 0.655 | 0.645 | 2.056 |
| STRAP  | 0.474  | 0.302 | 1.57   | 0.117 | 1.607 | 0.486 | 1.25   | 0.211 | 0.889 | 2.906 |
| STRADA | 0.454  | 0.303 | 1.496  | 0.135 | 1.574 | 0.477 | 1.203  | 0.229 | 0.869 | 2.852 |
| STRA6  | 0.225  | 0.298 | 0.757  | 0.449 | 1.253 | 0.373 | 0.678  | 0.498 | 0.699 | 2.246 |
| STON1  | -0.112 | 0.296 | -0.38  | 0.704 | 0.894 | 0.265 | -0.402 | 0.688 | 0.5   | 1.597 |
| STOML2 | 0.314  | 0.298 | 1.056  | 0.291 | 1.369 | 0.407 | 0.906  | 0.365 | 0.764 | 2.453 |
| STOML1 | 0.751  | 0.307 | 2.445  | 0.014 | 2.119 | 0.651 | 1.719  | 0.086 | 1.161 | 3.869 |
| STOM   | -0.12  | 0.295 | -0.407 | 0.684 | 0.887 | 0.262 | -0.432 | 0.666 | 0.497 | 1.582 |
| STN1   | -0.104 | 0.297 | -0.35  | 0.727 | 0.902 | 0.267 | -0.368 | 0.713 | 0.504 | 1.612 |
| STMN4  | -0.002 | 0.295 | -0.008 | 0.994 | 0.998 | 0.295 | -0.008 | 0.994 | 0.559 | 1.78  |
| STMN3  | -0.158 | 0.298 | -0.531 | 0.595 | 0.854 | 0.254 | -0.575 | 0.565 | 0.477 | 1.53  |
| STMN2  | 0.116  | 0.295 | 0.392  | 0.695 | 1.123 | 0.332 | 0.37   | 0.711 | 0.629 | 2.003 |
| STMN1  | 0.815  | 0.311 | 2.62   | 0.009 | 2.26  | 0.703 | 1.792  | 0.073 | 1.228 | 4.157 |
| STK4   | -0.062 | 0.295 | -0.211 | 0.833 | 0.94  | 0.278 | -0.218 | 0.828 | 0.527 | 1.677 |
| STK39  | -0.768 | 0.31  | -2.478 | 0.013 | 0.464 | 0.144 | -3.729 | 0     | 0.253 | 0.852 |

|         |        |       |        |       |       |       |        |       |       |       |
|---------|--------|-------|--------|-------|-------|-------|--------|-------|-------|-------|
| STK38L  | -0.248 | 0.297 | -0.836 | 0.403 | 0.78  | 0.231 | -0.949 | 0.343 | 0.436 | 1.396 |
| STK38   | 0.417  | 0.303 | 1.378  | 0.168 | 1.517 | 0.459 | 1.127  | 0.26  | 0.839 | 2.745 |
| STK32B  | -0.593 | 0.306 | -1.941 | 0.052 | 0.553 | 0.169 | -2.649 | 0.008 | 0.304 | 1.006 |
| STK3    | 0.488  | 0.3   | 1.625  | 0.104 | 1.629 | 0.489 | 1.286  | 0.198 | 0.904 | 2.934 |
| STK26   | 0.852  | 0.316 | 2.701  | 0.007 | 2.345 | 0.74  | 1.818  | 0.069 | 1.263 | 4.352 |
| STK25   | -0.045 | 0.295 | -0.153 | 0.878 | 0.956 | 0.282 | -0.157 | 0.875 | 0.536 | 1.705 |
| STK24   | 0.168  | 0.296 | 0.565  | 0.572 | 1.182 | 0.35  | 0.521  | 0.603 | 0.662 | 2.113 |
| STK19   | -0.218 | 0.296 | -0.735 | 0.462 | 0.804 | 0.238 | -0.821 | 0.412 | 0.45  | 1.438 |
| STK17B  | 0.008  | 0.295 | 0.028  | 0.978 | 1.008 | 0.298 | 0.028  | 0.978 | 0.565 | 1.798 |
| STK17A  | 0.426  | 0.302 | 1.409  | 0.159 | 1.531 | 0.463 | 1.147  | 0.251 | 0.847 | 2.77  |
| STK16   | 0.039  | 0.296 | 0.133  | 0.894 | 1.04  | 0.308 | 0.131  | 0.896 | 0.583 | 1.857 |
| STK11   | 0.166  | 0.298 | 0.558  | 0.577 | 1.181 | 0.351 | 0.514  | 0.607 | 0.659 | 2.115 |
| STK10   | 0.149  | 0.296 | 0.502  | 0.616 | 1.16  | 0.344 | 0.467  | 0.641 | 0.649 | 2.074 |
| STIP1   | 0.078  | 0.296 | 0.263  | 0.792 | 1.081 | 0.32  | 0.253  | 0.8   | 0.606 | 1.93  |
| STIMATE | 0.511  | 0.303 | 1.686  | 0.092 | 1.666 | 0.505 | 1.32   | 0.187 | 0.92  | 3.017 |
| STIM1   | -0.261 | 0.3   | -0.869 | 0.385 | 0.771 | 0.231 | -0.993 | 0.321 | 0.428 | 1.387 |
| STIL    | 0.6    | 0.306 | 1.961  | 0.05  | 1.822 | 0.557 | 1.475  | 0.14  | 1     | 3.317 |
| STEAP4  | -0.452 | 0.3   | -1.51  | 0.131 | 0.636 | 0.191 | -1.909 | 0.056 | 0.354 | 1.144 |
| STEAP3  | -0.101 | 0.297 | -0.34  | 0.734 | 0.904 | 0.268 | -0.358 | 0.72  | 0.505 | 1.617 |
| STEAP1B | 0.167  | 0.295 | 0.567  | 0.571 | 1.182 | 0.349 | 0.522  | 0.602 | 0.663 | 2.109 |
| STEAP1  | -0.727 | 0.315 | -2.31  | 0.021 | 0.483 | 0.152 | -3.395 | 0.001 | 0.261 | 0.896 |
| STC2    | -0.385 | 0.303 | -1.27  | 0.204 | 0.68  | 0.206 | -1.55  | 0.121 | 0.375 | 1.233 |
| STC1    | 0.464  | 0.3   | 1.548  | 0.122 | 1.59  | 0.477 | 1.238  | 0.216 | 0.884 | 2.861 |
| STAU2   | 0.109  | 0.295 | 0.369  | 0.712 | 1.115 | 0.329 | 0.35   | 0.727 | 0.625 | 1.989 |
| STAU1   | 0.723  | 0.31  | 2.335  | 0.02  | 2.061 | 0.638 | 1.662  | 0.096 | 1.123 | 3.781 |
| STATH   | -0.322 | 0.3   | -1.076 | 0.282 | 0.725 | 0.217 | -1.269 | 0.204 | 0.403 | 1.303 |
| STAT6   | -0.551 | 0.302 | -1.823 | 0.068 | 0.576 | 0.174 | -2.433 | 0.015 | 0.319 | 1.042 |
| STAT5B  | -0.609 | 0.304 | -2.004 | 0.045 | 0.544 | 0.165 | -2.759 | 0.006 | 0.3   | 0.987 |
| STAT5A  | -0.726 | 0.307 | -2.361 | 0.018 | 0.484 | 0.149 | -3.468 | 0.001 | 0.265 | 0.884 |
| STAT4   | -0.378 | 0.298 | -1.267 | 0.205 | 0.685 | 0.204 | -1.54  | 0.123 | 0.382 | 1.229 |
| STAT3   | 0.621  | 0.306 | 2.031  | 0.042 | 1.861 | 0.569 | 1.513  | 0.13  | 1.022 | 3.39  |
| STAT2   | 0.225  | 0.297 | 0.758  | 0.448 | 1.252 | 0.372 | 0.679  | 0.497 | 0.7   | 2.24  |
| STAT1   | 0.15   | 0.296 | 0.507  | 0.612 | 1.162 | 0.344 | 0.471  | 0.638 | 0.65  | 2.077 |
| STARD8  | -0.332 | 0.297 | -1.118 | 0.263 | 0.718 | 0.213 | -1.326 | 0.185 | 0.401 | 1.284 |
| STARD7  | 0.494  | 0.3   | 1.649  | 0.099 | 1.639 | 0.491 | 1.301  | 0.193 | 0.911 | 2.948 |
| STARD5  | -0.081 | 0.296 | -0.274 | 0.784 | 0.922 | 0.273 | -0.285 | 0.776 | 0.517 | 1.646 |
| STARD3  | 0.125  | 0.295 | 0.422  | 0.673 | 1.133 | 0.335 | 0.397  | 0.692 | 0.635 | 2.021 |
| STARD13 | -0.094 | 0.295 | -0.32  | 0.749 | 0.91  | 0.269 | -0.335 | 0.737 | 0.51  | 1.623 |

|            |        |       |        |       |       |       |        |       |       |       |
|------------|--------|-------|--------|-------|-------|-------|--------|-------|-------|-------|
| STAR       | -0.091 | 0.295 | -0.308 | 0.758 | 0.913 | 0.269 | -0.322 | 0.747 | 0.512 | 1.628 |
| STAP2      | 0.316  | 0.298 | 1.061  | 0.289 | 1.371 | 0.408 | 0.91   | 0.363 | 0.765 | 2.457 |
| STAP1      | -0.344 | 0.298 | -1.154 | 0.249 | 0.709 | 0.211 | -1.377 | 0.169 | 0.396 | 1.271 |
| STAMBPL1   | 0.296  | 0.298 | 0.996  | 0.319 | 1.345 | 0.4   | 0.862  | 0.389 | 0.75  | 2.41  |
| STAMBP     | 0.894  | 0.316 | 2.831  | 0.005 | 2.444 | 0.772 | 1.872  | 0.061 | 1.316 | 4.538 |
| STAM2      | 0.18   | 0.296 | 0.606  | 0.544 | 1.197 | 0.354 | 0.555  | 0.579 | 0.67  | 2.138 |
| STAM       | 0.421  | 0.299 | 1.41   | 0.159 | 1.524 | 0.456 | 1.15   | 0.25  | 0.848 | 2.739 |
| STAG3L4    | 0.585  | 0.303 | 1.932  | 0.053 | 1.794 | 0.543 | 1.463  | 0.143 | 0.992 | 3.247 |
| STAG3      | 0.247  | 0.298 | 0.829  | 0.407 | 1.28  | 0.381 | 0.735  | 0.462 | 0.714 | 2.295 |
| STAG2      | -0.289 | 0.297 | -0.972 | 0.331 | 0.749 | 0.223 | -1.126 | 0.26  | 0.418 | 1.342 |
| STAG1      | 0.038  | 0.295 | 0.128  | 0.898 | 1.039 | 0.307 | 0.126  | 0.9   | 0.582 | 1.852 |
| STAC       | 0.342  | 0.298 | 1.148  | 0.251 | 1.407 | 0.419 | 0.972  | 0.331 | 0.785 | 2.521 |
| STAB2      | -0.734 | 0.307 | -2.395 | 0.017 | 0.48  | 0.147 | -3.535 | 0     | 0.263 | 0.875 |
| STAB1      | 0.003  | 0.296 | 0.011  | 0.991 | 1.003 | 0.297 | 0.011  | 0.991 | 0.561 | 1.794 |
| ST8SIA5    | -0.143 | 0.296 | -0.484 | 0.629 | 0.867 | 0.257 | -0.52  | 0.603 | 0.485 | 1.548 |
| ST8SIA4    | -0.861 | 0.316 | -2.727 | 0.006 | 0.423 | 0.133 | -4.326 | 0     | 0.228 | 0.785 |
| ST8SIA3    | 0.417  | 0.303 | 1.376  | 0.169 | 1.517 | 0.459 | 1.126  | 0.26  | 0.838 | 2.746 |
| ST8SIA2    | -0.56  | 0.306 | -1.832 | 0.067 | 0.571 | 0.175 | -2.455 | 0.014 | 0.314 | 1.04  |
| ST8SIA1    | 0.179  | 0.296 | 0.603  | 0.546 | 1.196 | 0.354 | 0.552  | 0.581 | 0.669 | 2.137 |
| ST7L       | -0.381 | 0.3   | -1.273 | 0.203 | 0.683 | 0.205 | -1.55  | 0.121 | 0.38  | 1.228 |
| ST6GALNAC5 | -0.168 | 0.298 | -0.564 | 0.573 | 0.845 | 0.252 | -0.614 | 0.539 | 0.471 | 1.516 |
| ST6GALNAC4 | -0.378 | 0.3   | -1.262 | 0.207 | 0.685 | 0.205 | -1.534 | 0.125 | 0.381 | 1.232 |
| ST6GALNAC2 | 0.154  | 0.296 | 0.521  | 0.602 | 1.167 | 0.346 | 0.483  | 0.629 | 0.653 | 2.085 |
| ST6GAL1    | -0.09  | 0.295 | -0.304 | 0.761 | 0.914 | 0.27  | -0.318 | 0.75  | 0.513 | 1.631 |
| ST3GAL6    | -0.181 | 0.296 | -0.612 | 0.54  | 0.834 | 0.247 | -0.671 | 0.502 | 0.467 | 1.491 |
| ST3GAL5    | -0.039 | 0.295 | -0.132 | 0.895 | 0.962 | 0.284 | -0.135 | 0.893 | 0.539 | 1.715 |
| ST3GAL4    | 0.321  | 0.3   | 1.073  | 0.283 | 1.379 | 0.413 | 0.917  | 0.359 | 0.767 | 2.481 |
| ST3GAL2    | 0.357  | 0.3   | 1.193  | 0.233 | 1.429 | 0.428 | 1.003  | 0.316 | 0.795 | 2.571 |
| ST3GAL1    | 0.041  | 0.295 | 0.139  | 0.89  | 1.042 | 0.307 | 0.136  | 0.892 | 0.584 | 1.858 |
| ST20       | 0.474  | 0.302 | 1.568  | 0.117 | 1.606 | 0.485 | 1.249  | 0.212 | 0.888 | 2.905 |
| ST18       | 0.029  | 0.296 | 0.098  | 0.922 | 1.029 | 0.305 | 0.097  | 0.923 | 0.576 | 1.839 |
| ST14       | 0.411  | 0.298 | 1.379  | 0.168 | 1.509 | 0.45  | 1.13   | 0.258 | 0.841 | 2.708 |
| ST13       | -0.114 | 0.296 | -0.386 | 0.699 | 0.892 | 0.264 | -0.409 | 0.682 | 0.499 | 1.593 |
| SSX3       | 0.766  | 0.315 | 2.435  | 0.015 | 2.152 | 0.677 | 1.701  | 0.089 | 1.161 | 3.987 |
| SSX2IP     | 0.102  | 0.298 | 0.341  | 0.733 | 1.107 | 0.33  | 0.324  | 0.746 | 0.617 | 1.985 |
| SSX1       | 0.225  | 0.296 | 0.761  | 0.447 | 1.253 | 0.371 | 0.681  | 0.496 | 0.701 | 2.24  |
| SSUH2      | 0.025  | 0.296 | 0.084  | 0.933 | 1.025 | 0.303 | 0.083  | 0.934 | 0.574 | 1.83  |
| SSTR5      | 0.603  | 0.306 | 1.973  | 0.049 | 1.828 | 0.559 | 1.481  | 0.139 | 1.004 | 3.328 |

|        |        |       |        |       |       |       |        |       |       |       |
|--------|--------|-------|--------|-------|-------|-------|--------|-------|-------|-------|
| SSTR4  | 0.175  | 0.296 | 0.589  | 0.556 | 1.191 | 0.353 | 0.54   | 0.589 | 0.666 | 2.128 |
| SSTR3  | 0.688  | 0.307 | 2.244  | 0.025 | 1.99  | 0.61  | 1.622  | 0.105 | 1.091 | 3.631 |
| SSTR2  | 0.175  | 0.296 | 0.591  | 0.555 | 1.191 | 0.353 | 0.542  | 0.588 | 0.667 | 2.129 |
| SSTR1  | 0.134  | 0.297 | 0.452  | 0.652 | 1.144 | 0.34  | 0.423  | 0.673 | 0.639 | 2.049 |
| SST    | -0.033 | 0.295 | -0.111 | 0.911 | 0.968 | 0.286 | -0.113 | 0.91  | 0.543 | 1.725 |
| SSRP1  | -0.068 | 0.295 | -0.231 | 0.817 | 0.934 | 0.276 | -0.239 | 0.811 | 0.524 | 1.667 |
| SSR4   | -0.162 | 0.296 | -0.547 | 0.584 | 0.85  | 0.252 | -0.594 | 0.553 | 0.476 | 1.52  |
| SSR3   | -0.109 | 0.296 | -0.367 | 0.713 | 0.897 | 0.265 | -0.388 | 0.698 | 0.503 | 1.601 |
| SSR2   | -0.369 | 0.3   | -1.231 | 0.218 | 0.691 | 0.207 | -1.489 | 0.137 | 0.384 | 1.244 |
| SSR1   | -0.089 | 0.296 | -0.301 | 0.764 | 0.915 | 0.271 | -0.315 | 0.753 | 0.512 | 1.635 |
| SSPN   | -0.763 | 0.31  | -2.463 | 0.014 | 0.466 | 0.144 | -3.696 | 0     | 0.254 | 0.856 |
| SSNA1  | 0.222  | 0.296 | 0.75   | 0.454 | 1.249 | 0.37  | 0.672  | 0.501 | 0.699 | 2.231 |
| SSH3   | -0.512 | 0.3   | -1.709 | 0.088 | 0.599 | 0.18  | -2.232 | 0.026 | 0.333 | 1.078 |
| SSH1   | -0.338 | 0.298 | -1.135 | 0.256 | 0.713 | 0.212 | -1.35  | 0.177 | 0.398 | 1.279 |
| SSBP3  | -0.103 | 0.295 | -0.35  | 0.726 | 0.902 | 0.266 | -0.369 | 0.712 | 0.506 | 1.609 |
| SSBP2  | 0.158  | 0.296 | 0.535  | 0.593 | 1.172 | 0.347 | 0.494  | 0.621 | 0.655 | 2.094 |
| SSBP1  | 0.256  | 0.297 | 0.864  | 0.387 | 1.292 | 0.383 | 0.762  | 0.446 | 0.723 | 2.311 |
| SSB    | 0.763  | 0.31  | 2.462  | 0.014 | 2.145 | 0.665 | 1.723  | 0.085 | 1.168 | 3.936 |
| SS18L2 | -0.093 | 0.296 | -0.315 | 0.753 | 0.911 | 0.269 | -0.33  | 0.741 | 0.51  | 1.626 |
| SS18L1 | 0.527  | 0.303 | 1.74   | 0.082 | 1.693 | 0.512 | 1.353  | 0.176 | 0.936 | 3.064 |
| SS18   | -0.907 | 0.321 | -2.826 | 0.005 | 0.404 | 0.13  | -4.602 | 0     | 0.215 | 0.757 |
| SRY    | -0.587 | 0.303 | -1.94  | 0.052 | 0.556 | 0.168 | -2.641 | 0.008 | 0.307 | 1.006 |
| SRSF8  | -0.25  | 0.296 | -0.843 | 0.399 | 0.779 | 0.231 | -0.958 | 0.338 | 0.436 | 1.392 |
| SRSF7  | 0.32   | 0.3   | 1.067  | 0.286 | 1.378 | 0.414 | 0.913  | 0.361 | 0.765 | 2.483 |
| SRSF6  | -0.492 | 0.301 | -1.634 | 0.102 | 0.612 | 0.184 | -2.111 | 0.035 | 0.339 | 1.103 |
| SRSF5  | -0.627 | 0.306 | -2.05  | 0.04  | 0.534 | 0.163 | -2.851 | 0.004 | 0.293 | 0.973 |
| SRSF4  | 0.26   | 0.296 | 0.879  | 0.38  | 1.297 | 0.384 | 0.773  | 0.439 | 0.726 | 2.318 |
| SRSF3  | 0.842  | 0.311 | 2.708  | 0.007 | 2.322 | 0.722 | 1.83   | 0.067 | 1.262 | 4.271 |
| SRSF11 | 0.315  | 0.298 | 1.059  | 0.29  | 1.37  | 0.408 | 0.908  | 0.364 | 0.765 | 2.456 |
| SRSF10 | 0.172  | 0.296 | 0.583  | 0.56  | 1.188 | 0.351 | 0.535  | 0.593 | 0.665 | 2.121 |
| SRSF1  | 1.127  | 0.336 | 3.354  | 0.001 | 3.088 | 1.038 | 2.012  | 0.044 | 1.598 | 5.966 |
| SRRT   | 0.369  | 0.3   | 1.231  | 0.218 | 1.446 | 0.433 | 1.029  | 0.303 | 0.804 | 2.601 |
| SRRM2  | -0.393 | 0.299 | -1.315 | 0.188 | 0.675 | 0.202 | -1.611 | 0.107 | 0.376 | 1.212 |
| SRRM1  | 0.235  | 0.296 | 0.793  | 0.428 | 1.265 | 0.375 | 0.706  | 0.48  | 0.708 | 2.26  |
| SRRD   | 0.75   | 0.307 | 2.445  | 0.014 | 2.117 | 0.649 | 1.72   | 0.085 | 1.16  | 3.861 |
| SRR    | -0.01  | 0.295 | -0.033 | 0.973 | 0.99  | 0.292 | -0.034 | 0.973 | 0.555 | 1.766 |
| SRPX2  | -0.348 | 0.298 | -1.168 | 0.243 | 0.706 | 0.21  | -1.396 | 0.163 | 0.394 | 1.266 |
| SRPX   | -0.481 | 0.3   | -1.606 | 0.108 | 0.618 | 0.185 | -2.062 | 0.039 | 0.343 | 1.112 |

|          |        |       |        |       |       |       |        |       |       |       |
|----------|--------|-------|--------|-------|-------|-------|--------|-------|-------|-------|
| SRPRB    | 0.142  | 0.296 | 0.479  | 0.632 | 1.153 | 0.342 | 0.447  | 0.655 | 0.645 | 2.061 |
| SRPRA    | -0.816 | 0.315 | -2.59  | 0.01  | 0.442 | 0.139 | -4.003 | 0     | 0.239 | 0.82  |
| SRPK3    | -0.056 | 0.297 | -0.188 | 0.851 | 0.946 | 0.281 | -0.193 | 0.847 | 0.528 | 1.693 |
| SRPK2    | -0.051 | 0.295 | -0.173 | 0.863 | 0.95  | 0.281 | -0.178 | 0.859 | 0.532 | 1.695 |
| SRPK1    | 0.413  | 0.304 | 1.362  | 0.173 | 1.512 | 0.459 | 1.115  | 0.265 | 0.834 | 2.741 |
| SRP9     | 0.131  | 0.296 | 0.442  | 0.658 | 1.14  | 0.338 | 0.415  | 0.678 | 0.638 | 2.038 |
| SRP72    | 0.168  | 0.296 | 0.57   | 0.569 | 1.183 | 0.35  | 0.524  | 0.6   | 0.663 | 2.112 |
| SRP54    | -0.027 | 0.297 | -0.092 | 0.927 | 0.973 | 0.289 | -0.093 | 0.926 | 0.543 | 1.743 |
| SRP19    | 0.156  | 0.296 | 0.526  | 0.599 | 1.169 | 0.346 | 0.487  | 0.626 | 0.654 | 2.088 |
| SRP14    | 0.074  | 0.296 | 0.25   | 0.803 | 1.077 | 0.319 | 0.241  | 0.81  | 0.603 | 1.923 |
| SRM      | -0.55  | 0.302 | -1.819 | 0.069 | 0.577 | 0.174 | -2.425 | 0.015 | 0.319 | 1.044 |
| SRI      | 0.338  | 0.298 | 1.134  | 0.257 | 1.402 | 0.417 | 0.963  | 0.336 | 0.782 | 2.512 |
| SRGN     | 0.228  | 0.298 | 0.763  | 0.445 | 1.256 | 0.375 | 0.682  | 0.495 | 0.7   | 2.253 |
| SRGAP3   | 0      | 0.295 | -0.001 | 0.999 | 1     | 0.295 | -0.001 | 0.999 | 0.561 | 1.783 |
| SRF      | 0.353  | 0.3   | 1.176  | 0.24  | 1.423 | 0.427 | 0.991  | 0.322 | 0.791 | 2.56  |
| SREK1IP1 | 0.903  | 0.313 | 2.889  | 0.004 | 2.467 | 0.771 | 1.903  | 0.057 | 1.337 | 4.552 |
| SREK1    | -0.67  | 0.306 | -2.188 | 0.029 | 0.512 | 0.157 | -3.116 | 0.002 | 0.281 | 0.933 |
| SREBF2   | -0.179 | 0.296 | -0.604 | 0.546 | 0.836 | 0.248 | -0.662 | 0.508 | 0.468 | 1.494 |
| SREBF1   | -0.321 | 0.298 | -1.078 | 0.281 | 0.725 | 0.216 | -1.271 | 0.204 | 0.405 | 1.301 |
| SRD5A3   | 0.025  | 0.295 | 0.083  | 0.934 | 1.025 | 0.303 | 0.082  | 0.934 | 0.575 | 1.828 |
| SRD5A2   | -0.486 | 0.3   | -1.619 | 0.105 | 0.615 | 0.185 | -2.085 | 0.037 | 0.341 | 1.108 |
| SRD5A1   | 0.187  | 0.297 | 0.628  | 0.53  | 1.205 | 0.358 | 0.573  | 0.567 | 0.673 | 2.159 |
| SRCAP    | -0.13  | 0.296 | -0.441 | 0.659 | 0.878 | 0.259 | -0.471 | 0.637 | 0.492 | 1.567 |
| SRC      | 0.278  | 0.297 | 0.935  | 0.35  | 1.32  | 0.392 | 0.817  | 0.414 | 0.738 | 2.364 |
| SRBD1    | -0.294 | 0.298 | -0.984 | 0.325 | 0.746 | 0.222 | -1.143 | 0.253 | 0.415 | 1.338 |
| SQSTM1   | -0.717 | 0.31  | -2.312 | 0.021 | 0.488 | 0.151 | -3.38  | 0.001 | 0.266 | 0.897 |
| SQOR     | -0.503 | 0.313 | -1.605 | 0.109 | 0.605 | 0.189 | -2.085 | 0.037 | 0.327 | 1.118 |
| SOLE     | 0.449  | 0.307 | 1.46   | 0.144 | 1.566 | 0.481 | 1.177  | 0.239 | 0.858 | 2.86  |
| SPX      | -0.048 | 0.295 | -0.161 | 0.872 | 0.954 | 0.282 | -0.165 | 0.869 | 0.534 | 1.701 |
| SPTSSA   | 0.101  | 0.295 | 0.342  | 0.732 | 1.106 | 0.327 | 0.325  | 0.745 | 0.62  | 1.973 |
| SPTLC3   | 1.057  | 0.322 | 3.282  | 0.001 | 2.877 | 0.926 | 2.026  | 0.043 | 1.531 | 5.408 |
| SPTLC2   | 0.691  | 0.31  | 2.229  | 0.026 | 1.996 | 0.619 | 1.61   | 0.107 | 1.087 | 3.665 |
| SPTLC1   | -0.16  | 0.296 | -0.542 | 0.588 | 0.852 | 0.252 | -0.588 | 0.557 | 0.477 | 1.522 |
| SPTBN5   | -0.141 | 0.295 | -0.479 | 0.632 | 0.868 | 0.256 | -0.514 | 0.607 | 0.487 | 1.549 |
| SPTBN4   | 0.08   | 0.295 | 0.272  | 0.786 | 1.084 | 0.32  | 0.261  | 0.794 | 0.607 | 1.934 |
| SPTBN2   | 0.121  | 0.296 | 0.409  | 0.682 | 1.129 | 0.334 | 0.385  | 0.7   | 0.632 | 2.017 |
| SPTBN1   | -0.149 | 0.296 | -0.504 | 0.614 | 0.861 | 0.255 | -0.544 | 0.586 | 0.483 | 1.538 |
| SPTB     | 0.235  | 0.298 | 0.791  | 0.429 | 1.266 | 0.377 | 0.705  | 0.481 | 0.706 | 2.268 |

|         |        |       |        |       |       |       |        |       |       |       |
|---------|--------|-------|--------|-------|-------|-------|--------|-------|-------|-------|
| SPTAN1  | -0.872 | 0.316 | -2.763 | 0.006 | 0.418 | 0.132 | -4.409 | 0     | 0.225 | 0.776 |
| SPTA1   | 0.55   | 0.306 | 1.801  | 0.072 | 1.734 | 0.53  | 1.385  | 0.166 | 0.953 | 3.156 |
| SPSB3   | -0.027 | 0.296 | -0.09  | 0.928 | 0.974 | 0.288 | -0.092 | 0.927 | 0.545 | 1.738 |
| SPSB1   | -0.023 | 0.297 | -0.079 | 0.937 | 0.977 | 0.29  | -0.08  | 0.936 | 0.546 | 1.748 |
| SPRYD7  | 0.551  | 0.306 | 1.8    | 0.072 | 1.735 | 0.531 | 1.384  | 0.166 | 0.952 | 3.16  |
| SPRY4   | -0.615 | 0.306 | -2.008 | 0.045 | 0.54  | 0.166 | -2.775 | 0.006 | 0.296 | 0.985 |
| SPRY2   | -0.086 | 0.295 | -0.292 | 0.77  | 0.917 | 0.271 | -0.305 | 0.76  | 0.515 | 1.636 |
| SPRY1   | -0.176 | 0.296 | -0.595 | 0.552 | 0.838 | 0.248 | -0.65  | 0.515 | 0.469 | 1.498 |
| SPRR3   | 0.022  | 0.295 | 0.076  | 0.94  | 1.023 | 0.302 | 0.075  | 0.94  | 0.574 | 1.823 |
| SPRR2C  | 0.331  | 0.297 | 1.114  | 0.265 | 1.392 | 0.413 | 0.949  | 0.343 | 0.778 | 2.492 |
| SPRR1B  | 0.322  | 0.3   | 1.074  | 0.283 | 1.38  | 0.413 | 0.918  | 0.359 | 0.767 | 2.482 |
| SPRR1A  | -0.546 | 0.303 | -1.803 | 0.071 | 0.579 | 0.175 | -2.399 | 0.016 | 0.32  | 1.049 |
| SPRING1 | -0.211 | 0.297 | -0.711 | 0.477 | 0.81  | 0.24  | -0.792 | 0.428 | 0.453 | 1.449 |
| SPRED2  | -0.733 | 0.31  | -2.364 | 0.018 | 0.481 | 0.149 | -3.486 | 0     | 0.262 | 0.882 |
| SPR     | 0.057  | 0.295 | 0.193  | 0.847 | 1.059 | 0.313 | 0.188  | 0.851 | 0.593 | 1.889 |
| SPPL2B  | -0.349 | 0.299 | -1.169 | 0.242 | 0.705 | 0.211 | -1.399 | 0.162 | 0.393 | 1.267 |
| SPP2    | -0.548 | 0.303 | -1.805 | 0.071 | 0.578 | 0.175 | -2.404 | 0.016 | 0.319 | 1.048 |
| SPP1    | 0.266  | 0.296 | 0.898  | 0.369 | 1.305 | 0.386 | 0.788  | 0.431 | 0.73  | 2.331 |
| SPOUT1  | 0.085  | 0.296 | 0.288  | 0.773 | 1.089 | 0.322 | 0.276  | 0.783 | 0.61  | 1.944 |
| SPOP    | -0.296 | 0.298 | -0.996 | 0.319 | 0.744 | 0.221 | -1.159 | 0.247 | 0.415 | 1.332 |
| SPON1   | -0.88  | 0.315 | -2.793 | 0.005 | 0.415 | 0.131 | -4.477 | 0     | 0.224 | 0.769 |
| SPOCK3  | 0.377  | 0.302 | 1.248  | 0.212 | 1.458 | 0.441 | 1.04   | 0.298 | 0.806 | 2.637 |
| SPOCK2  | -0.211 | 0.297 | -0.712 | 0.476 | 0.809 | 0.24  | -0.793 | 0.428 | 0.452 | 1.448 |
| SPOCK1  | -0.056 | 0.295 | -0.189 | 0.85  | 0.946 | 0.279 | -0.195 | 0.846 | 0.53  | 1.687 |
| SPO11   | -0.632 | 0.303 | -2.084 | 0.037 | 0.532 | 0.161 | -2.907 | 0.004 | 0.293 | 0.963 |
| SPN     | 0.392  | 0.298 | 1.315  | 0.188 | 1.48  | 0.441 | 1.088  | 0.277 | 0.825 | 2.655 |
| SPINT3  | -0.054 | 0.296 | -0.183 | 0.855 | 0.947 | 0.281 | -0.188 | 0.851 | 0.53  | 1.693 |
| SPINT2  | 0.342  | 0.298 | 1.15   | 0.25  | 1.408 | 0.419 | 0.974  | 0.33  | 0.786 | 2.524 |
| SPINT1  | 0.357  | 0.298 | 1.199  | 0.231 | 1.429 | 0.426 | 1.008  | 0.313 | 0.797 | 2.563 |
| SPINK5  | -0.218 | 0.296 | -0.737 | 0.461 | 0.804 | 0.238 | -0.823 | 0.41  | 0.45  | 1.437 |
| SPINK4  | 0.146  | 0.295 | 0.495  | 0.62  | 1.158 | 0.342 | 0.461  | 0.645 | 0.649 | 2.065 |
| SPINK2  | -0.064 | 0.295 | -0.217 | 0.828 | 0.938 | 0.277 | -0.225 | 0.822 | 0.526 | 1.672 |
| SPINK1  | 0.646  | 0.31  | 2.085  | 0.037 | 1.907 | 0.591 | 1.536  | 0.125 | 1.039 | 3.5   |
| SPIN2A  | -0.159 | 0.295 | -0.537 | 0.591 | 0.853 | 0.252 | -0.582 | 0.56  | 0.478 | 1.522 |
| SPIN1   | -0.35  | 0.298 | -1.177 | 0.239 | 0.705 | 0.21  | -1.409 | 0.159 | 0.393 | 1.262 |
| SPIDR   | -0.241 | 0.298 | -0.808 | 0.419 | 0.786 | 0.234 | -0.914 | 0.361 | 0.439 | 1.409 |
| SPICE1  | -0.061 | 0.295 | -0.207 | 0.836 | 0.941 | 0.278 | -0.213 | 0.831 | 0.527 | 1.678 |
| SPIB    | -0.063 | 0.296 | -0.212 | 0.832 | 0.939 | 0.278 | -0.219 | 0.827 | 0.525 | 1.679 |

|           |        |       |        |       |       |       |        |       |       |       |
|-----------|--------|-------|--------|-------|-------|-------|--------|-------|-------|-------|
| SPI1      | -0.249 | 0.298 | -0.836 | 0.403 | 0.779 | 0.232 | -0.949 | 0.343 | 0.434 | 1.399 |
| SPHK2     | 0.326  | 0.298 | 1.094  | 0.274 | 1.385 | 0.412 | 0.934  | 0.35  | 0.773 | 2.482 |
| SPHK1     | -0.022 | 0.296 | -0.076 | 0.94  | 0.978 | 0.289 | -0.076 | 0.939 | 0.547 | 1.747 |
| SPG21     | -0.238 | 0.297 | -0.801 | 0.423 | 0.788 | 0.234 | -0.904 | 0.366 | 0.44  | 1.411 |
| SPG11     | -0.638 | 0.31  | -2.059 | 0.04  | 0.528 | 0.164 | -2.88  | 0.004 | 0.288 | 0.97  |
| SPEN      | -0.32  | 0.298 | -1.076 | 0.282 | 0.726 | 0.216 | -1.268 | 0.205 | 0.405 | 1.301 |
| SPEF1     | -0.292 | 0.298 | -0.98  | 0.327 | 0.747 | 0.223 | -1.138 | 0.255 | 0.416 | 1.339 |
| SPECC1L   | -0.02  | 0.295 | -0.067 | 0.946 | 0.98  | 0.29  | -0.068 | 0.946 | 0.549 | 1.749 |
| SPDYE2    | 0.019  | 0.298 | 0.065  | 0.948 | 1.019 | 0.304 | 0.064  | 0.949 | 0.568 | 1.829 |
| SPDL1     | 0.709  | 0.31  | 2.287  | 0.022 | 2.033 | 0.631 | 1.638  | 0.102 | 1.107 | 3.734 |
| SPDEF     | 0.224  | 0.296 | 0.755  | 0.45  | 1.251 | 0.37  | 0.677  | 0.498 | 0.7   | 2.235 |
| SPCS3     | -0.196 | 0.296 | -0.663 | 0.508 | 0.822 | 0.243 | -0.732 | 0.464 | 0.46  | 1.468 |
| SPCS2     | -0.3   | 0.3   | -1     | 0.317 | 0.741 | 0.222 | -1.165 | 0.244 | 0.412 | 1.333 |
| SPCS1     | -0.054 | 0.296 | -0.183 | 0.855 | 0.947 | 0.28  | -0.188 | 0.851 | 0.531 | 1.691 |
| SPC25     | 0.584  | 0.302 | 1.931  | 0.053 | 1.793 | 0.542 | 1.463  | 0.144 | 0.991 | 3.243 |
| SPATS2L   | -0.771 | 0.31  | -2.488 | 0.013 | 0.462 | 0.143 | -3.75  | 0     | 0.252 | 0.849 |
| SPATS2    | 0.315  | 0.297 | 1.061  | 0.289 | 1.37  | 0.407 | 0.91   | 0.363 | 0.766 | 2.452 |
| SPATA7    | 0.051  | 0.297 | 0.17   | 0.865 | 1.052 | 0.313 | 0.166  | 0.868 | 0.587 | 1.883 |
| SPATA6L   | 0.152  | 0.296 | 0.513  | 0.608 | 1.164 | 0.345 | 0.476  | 0.634 | 0.651 | 2.08  |
| SPATA6    | -0.52  | 0.306 | -1.701 | 0.089 | 0.595 | 0.182 | -2.23  | 0.026 | 0.327 | 1.082 |
| SPATA5L1  | -0.045 | 0.297 | -0.151 | 0.88  | 0.956 | 0.284 | -0.155 | 0.877 | 0.534 | 1.713 |
| SPATA31C2 | 0.573  | 0.303 | 1.894  | 0.058 | 1.774 | 0.537 | 1.441  | 0.15  | 0.98  | 3.212 |
| SPATA2L   | 0.577  | 0.301 | 1.914  | 0.056 | 1.78  | 0.537 | 1.454  | 0.146 | 0.986 | 3.214 |
| SPATA20   | -0.099 | 0.295 | -0.334 | 0.738 | 0.906 | 0.268 | -0.351 | 0.726 | 0.508 | 1.616 |
| SPATA2    | -0.864 | 0.321 | -2.696 | 0.007 | 0.421 | 0.135 | -4.283 | 0     | 0.225 | 0.79  |
| SPATA1    | -0.084 | 0.295 | -0.286 | 0.775 | 0.919 | 0.272 | -0.298 | 0.765 | 0.515 | 1.64  |
| SPAST     | -0.772 | 0.308 | -2.504 | 0.012 | 0.462 | 0.142 | -3.775 | 0     | 0.253 | 0.846 |
| SPART     | -0.374 | 0.3   | -1.249 | 0.212 | 0.688 | 0.206 | -1.515 | 0.13  | 0.382 | 1.237 |
| SPARCL1   | -0.459 | 0.3   | -1.533 | 0.125 | 0.632 | 0.189 | -1.945 | 0.052 | 0.351 | 1.137 |
| SPARC     | -0.52  | 0.302 | -1.72  | 0.085 | 0.595 | 0.18  | -2.256 | 0.024 | 0.329 | 1.075 |
| SPAM1     | 0.926  | 0.315 | 2.94   | 0.003 | 2.525 | 0.795 | 1.917  | 0.055 | 1.362 | 4.681 |
| SPAG9     | -0.139 | 0.297 | -0.466 | 0.641 | 0.871 | 0.259 | -0.5   | 0.617 | 0.486 | 1.559 |
| SPAG8     | 0.152  | 0.296 | 0.515  | 0.606 | 1.165 | 0.344 | 0.478  | 0.633 | 0.652 | 2.079 |
| SPAG7     | -0.279 | 0.3   | -0.93  | 0.352 | 0.757 | 0.227 | -1.073 | 0.283 | 0.42  | 1.362 |
| SPAG6     | -0.049 | 0.295 | -0.166 | 0.868 | 0.952 | 0.281 | -0.17  | 0.865 | 0.534 | 1.699 |
| SPAG5     | 0.984  | 0.321 | 3.069  | 0.002 | 2.675 | 0.857 | 1.953  | 0.051 | 1.427 | 5.013 |
| SPAG4     | -0.07  | 0.295 | -0.239 | 0.811 | 0.932 | 0.275 | -0.247 | 0.805 | 0.522 | 1.662 |
| SPAG16    | 0.122  | 0.295 | 0.412  | 0.68  | 1.129 | 0.334 | 0.388  | 0.698 | 0.633 | 2.015 |



|         |        |       |        |       |       |       |        |       |       |       |
|---------|--------|-------|--------|-------|-------|-------|--------|-------|-------|-------|
| SPAG11A | -0.09  | 0.295 | -0.304 | 0.761 | 0.914 | 0.27  | -0.318 | 0.75  | 0.512 | 1.631 |
| SPAG1   | -0.013 | 0.295 | -0.043 | 0.965 | 0.987 | 0.292 | -0.044 | 0.965 | 0.553 | 1.761 |
| SPACA9  | 0.092  | 0.296 | 0.31   | 0.757 | 1.096 | 0.325 | 0.296  | 0.767 | 0.613 | 1.959 |
| SPACA1  | 0.083  | 0.296 | 0.28   | 0.779 | 1.087 | 0.322 | 0.269  | 0.788 | 0.608 | 1.943 |
| SPA17   | -0.262 | 0.298 | -0.88  | 0.379 | 0.77  | 0.229 | -1.006 | 0.314 | 0.429 | 1.379 |
| SP4     | -0.228 | 0.297 | -0.768 | 0.443 | 0.796 | 0.236 | -0.862 | 0.389 | 0.445 | 1.424 |
| SP3P    | 0.067  | 0.295 | 0.226  | 0.821 | 1.069 | 0.316 | 0.218  | 0.827 | 0.599 | 1.907 |
| SP3     | -0.052 | 0.295 | -0.176 | 0.86  | 0.949 | 0.28  | -0.181 | 0.857 | 0.532 | 1.694 |
| SP2     | 0.249  | 0.298 | 0.836  | 0.403 | 1.283 | 0.382 | 0.74   | 0.459 | 0.716 | 2.299 |
| SP140L  | -0.412 | 0.3   | -1.372 | 0.17  | 0.663 | 0.199 | -1.698 | 0.09  | 0.368 | 1.193 |
| SP140   | 0.057  | 0.295 | 0.194  | 0.846 | 1.059 | 0.313 | 0.189  | 0.85  | 0.593 | 1.89  |
| SP110   | -0.042 | 0.296 | -0.143 | 0.887 | 0.959 | 0.284 | -0.146 | 0.884 | 0.537 | 1.712 |
| SP100   | -0.33  | 0.297 | -1.112 | 0.266 | 0.719 | 0.213 | -1.318 | 0.188 | 0.402 | 1.286 |
| SP1     | -0.265 | 0.298 | -0.89  | 0.374 | 0.767 | 0.228 | -1.019 | 0.308 | 0.428 | 1.375 |
| SOX9    | 0.409  | 0.3   | 1.363  | 0.173 | 1.505 | 0.451 | 1.119  | 0.263 | 0.836 | 2.707 |
| SOX5    | -0.215 | 0.296 | -0.727 | 0.467 | 0.806 | 0.239 | -0.811 | 0.417 | 0.451 | 1.441 |
| SOX4    | 0.87   | 0.321 | 2.714  | 0.007 | 2.387 | 0.765 | 1.812  | 0.07  | 1.273 | 4.474 |
| SOX30   | 0.416  | 0.3   | 1.39   | 0.165 | 1.516 | 0.454 | 1.137  | 0.256 | 0.843 | 2.727 |
| SOX3    | 0.258  | 0.298 | 0.868  | 0.385 | 1.295 | 0.386 | 0.765  | 0.444 | 0.722 | 2.321 |
| SOX21   | -0.351 | 0.3   | -1.169 | 0.242 | 0.704 | 0.211 | -1.401 | 0.161 | 0.391 | 1.268 |
| SOX2    | 0.786  | 0.315 | 2.497  | 0.013 | 2.194 | 0.691 | 1.729  | 0.084 | 1.184 | 4.066 |
| SOX18   | -0.399 | 0.3   | -1.333 | 0.183 | 0.671 | 0.201 | -1.638 | 0.101 | 0.373 | 1.207 |
| SOX17   | -0.41  | 0.3   | -1.367 | 0.172 | 0.664 | 0.199 | -1.689 | 0.091 | 0.369 | 1.195 |
| SOX15   | -0.029 | 0.295 | -0.099 | 0.921 | 0.971 | 0.287 | -0.1   | 0.92  | 0.545 | 1.732 |
| SOX14   | -0.422 | 0.303 | -1.396 | 0.163 | 0.655 | 0.198 | -1.738 | 0.082 | 0.362 | 1.186 |
| SOX13   | -0.282 | 0.297 | -0.949 | 0.342 | 0.754 | 0.224 | -1.097 | 0.273 | 0.422 | 1.35  |
| SOX12   | 0.368  | 0.3   | 1.23   | 0.219 | 1.445 | 0.433 | 1.029  | 0.304 | 0.803 | 2.601 |
| SOX11   | 0.944  | 0.321 | 2.943  | 0.003 | 2.57  | 0.825 | 1.904  | 0.057 | 1.371 | 4.82  |
| SOX10   | -0.002 | 0.295 | -0.007 | 0.994 | 0.998 | 0.295 | -0.007 | 0.994 | 0.559 | 1.78  |
| SOX1    | -0.361 | 0.298 | -1.211 | 0.226 | 0.697 | 0.208 | -1.458 | 0.145 | 0.389 | 1.25  |
| SOWAHC  | -0.478 | 0.302 | -1.582 | 0.114 | 0.62  | 0.187 | -2.029 | 0.042 | 0.343 | 1.121 |
| SOSTDC1 | -0.152 | 0.296 | -0.512 | 0.609 | 0.859 | 0.254 | -0.553 | 0.58  | 0.481 | 1.535 |
| SOS2    | -0.146 | 0.296 | -0.493 | 0.622 | 0.864 | 0.256 | -0.531 | 0.595 | 0.483 | 1.544 |
| SOS1    | 0.154  | 0.297 | 0.52   | 0.603 | 1.167 | 0.346 | 0.482  | 0.63  | 0.652 | 2.086 |
| SORT1   | 0.172  | 0.295 | 0.583  | 0.56  | 1.188 | 0.351 | 0.535  | 0.592 | 0.666 | 2.119 |
| SORL1   | -0.291 | 0.298 | -0.976 | 0.329 | 0.748 | 0.223 | -1.132 | 0.258 | 0.417 | 1.341 |
| SORD    | -0.44  | 0.3   | -1.468 | 0.142 | 0.644 | 0.193 | -1.845 | 0.065 | 0.358 | 1.159 |
| SORCS3  | 0.171  | 0.297 | 0.577  | 0.564 | 1.187 | 0.352 | 0.53   | 0.596 | 0.664 | 2.122 |

|         |        |       |        |       |       |       |        |       |       |       |
|---------|--------|-------|--------|-------|-------|-------|--------|-------|-------|-------|
| SORBS3  | -0.353 | 0.3   | -1.179 | 0.239 | 0.702 | 0.211 | -1.413 | 0.158 | 0.39  | 1.264 |
| SORBS2  | -0.119 | 0.295 | -0.401 | 0.688 | 0.888 | 0.262 | -0.426 | 0.67  | 0.498 | 1.584 |
| SORBS1  | -0.207 | 0.299 | -0.69  | 0.49  | 0.813 | 0.243 | -0.767 | 0.443 | 0.453 | 1.462 |
| SON     | -0.226 | 0.296 | -0.762 | 0.446 | 0.798 | 0.236 | -0.855 | 0.393 | 0.447 | 1.426 |
| SOGA1   | 0.103  | 0.296 | 0.348  | 0.728 | 1.108 | 0.328 | 0.331  | 0.741 | 0.621 | 1.979 |
| SOD3    | -0.28  | 0.296 | -0.944 | 0.345 | 0.756 | 0.224 | -1.089 | 0.276 | 0.423 | 1.351 |
| SOD1    | 0.793  | 0.308 | 2.576  | 0.01  | 2.209 | 0.68  | 1.779  | 0.075 | 1.209 | 4.038 |
| SOCS7   | 0.408  | 0.3   | 1.363  | 0.173 | 1.504 | 0.451 | 1.119  | 0.263 | 0.836 | 2.706 |
| SOCS6   | -0.496 | 0.306 | -1.624 | 0.104 | 0.609 | 0.186 | -2.103 | 0.035 | 0.334 | 1.108 |
| SOCS5   | -0.186 | 0.296 | -0.627 | 0.53  | 0.83  | 0.246 | -0.69  | 0.49  | 0.465 | 1.484 |
| SOCS3   | 0.177  | 0.296 | 0.599  | 0.549 | 1.194 | 0.354 | 0.549  | 0.583 | 0.668 | 2.134 |
| SOCS2   | -0.528 | 0.302 | -1.747 | 0.081 | 0.59  | 0.178 | -2.302 | 0.021 | 0.326 | 1.066 |
| SOCS1   | -0.04  | 0.295 | -0.134 | 0.893 | 0.961 | 0.284 | -0.137 | 0.891 | 0.539 | 1.715 |
| SOBP    | 0.051  | 0.297 | 0.173  | 0.863 | 1.053 | 0.313 | 0.168  | 0.866 | 0.588 | 1.884 |
| SOAT2   | 0.137  | 0.297 | 0.463  | 0.643 | 1.147 | 0.34  | 0.433  | 0.665 | 0.642 | 2.051 |
| SOAT1   | 0.165  | 0.295 | 0.56   | 0.575 | 1.18  | 0.348 | 0.516  | 0.606 | 0.661 | 2.105 |
| SNX7    | -0.18  | 0.298 | -0.605 | 0.545 | 0.835 | 0.249 | -0.663 | 0.507 | 0.466 | 1.498 |
| SNX6    | 0.027  | 0.295 | 0.092  | 0.927 | 1.028 | 0.303 | 0.091  | 0.928 | 0.576 | 1.833 |
| SNX5    | -0.31  | 0.298 | -1.04  | 0.298 | 0.734 | 0.218 | -1.219 | 0.223 | 0.409 | 1.315 |
| SNX4    | 0.038  | 0.295 | 0.128  | 0.899 | 1.038 | 0.307 | 0.125  | 0.9   | 0.582 | 1.852 |
| SNX3    | -0.284 | 0.296 | -0.959 | 0.337 | 0.753 | 0.223 | -1.109 | 0.267 | 0.421 | 1.345 |
| SNX29P2 | 0.077  | 0.296 | 0.261  | 0.794 | 1.08  | 0.32  | 0.251  | 0.802 | 0.605 | 1.929 |
| SNX27   | -0.217 | 0.296 | -0.732 | 0.464 | 0.805 | 0.238 | -0.818 | 0.413 | 0.451 | 1.438 |
| SNX24   | -0.435 | 0.307 | -1.419 | 0.156 | 0.647 | 0.199 | -1.778 | 0.075 | 0.355 | 1.181 |
| SNX2    | -0.246 | 0.298 | -0.827 | 0.408 | 0.782 | 0.233 | -0.937 | 0.349 | 0.436 | 1.401 |
| SNX19   | -0.646 | 0.306 | -2.109 | 0.035 | 0.524 | 0.161 | -2.963 | 0.003 | 0.288 | 0.956 |
| SNX17   | -0.556 | 0.311 | -1.785 | 0.074 | 0.574 | 0.179 | -2.387 | 0.017 | 0.312 | 1.056 |
| SNX16   | -0.176 | 0.296 | -0.596 | 0.551 | 0.838 | 0.248 | -0.651 | 0.515 | 0.469 | 1.498 |
| SNX15   | -0.076 | 0.296 | -0.256 | 0.798 | 0.927 | 0.275 | -0.266 | 0.79  | 0.519 | 1.657 |
| SNX13   | 0.225  | 0.296 | 0.759  | 0.448 | 1.252 | 0.371 | 0.68   | 0.496 | 0.701 | 2.238 |
| SNX11   | 0.135  | 0.296 | 0.454  | 0.65  | 1.144 | 0.339 | 0.425  | 0.671 | 0.64  | 2.045 |
| SNX10   | 0.493  | 0.302 | 1.629  | 0.103 | 1.637 | 0.495 | 1.286  | 0.198 | 0.905 | 2.961 |
| SNX1    | -0.492 | 0.302 | -1.629 | 0.103 | 0.611 | 0.185 | -2.105 | 0.035 | 0.338 | 1.105 |
| SNW1    | 0.5    | 0.3   | 1.666  | 0.096 | 1.649 | 0.496 | 1.311  | 0.19  | 0.915 | 2.972 |
| SNUPN   | -0.209 | 0.298 | -0.7   | 0.484 | 0.812 | 0.242 | -0.778 | 0.436 | 0.453 | 1.455 |
| SNU13   | -0.386 | 0.302 | -1.276 | 0.202 | 0.68  | 0.206 | -1.557 | 0.119 | 0.376 | 1.23  |
| SNTG2   | 0.13   | 0.295 | 0.441  | 0.66  | 1.139 | 0.336 | 0.413  | 0.68  | 0.638 | 2.032 |
| SNTG1   | -0.126 | 0.296 | -0.427 | 0.67  | 0.881 | 0.261 | -0.455 | 0.649 | 0.493 | 1.575 |

|          |        |       |        |       |       |       |        |       |       |       |
|----------|--------|-------|--------|-------|-------|-------|--------|-------|-------|-------|
| SNTB2    | 0.547  | 0.306 | 1.791  | 0.073 | 1.729 | 0.528 | 1.379  | 0.168 | 0.95  | 3.147 |
| SNTB1    | -0.706 | 0.31  | -2.28  | 0.023 | 0.493 | 0.153 | -3.314 | 0.001 | 0.269 | 0.906 |
| SNTA1    | 0.406  | 0.3   | 1.356  | 0.175 | 1.501 | 0.45  | 1.114  | 0.265 | 0.834 | 2.702 |
| SNRPG    | 0.902  | 0.315 | 2.862  | 0.004 | 2.465 | 0.777 | 1.885  | 0.059 | 1.329 | 4.572 |
| SNRPF    | 0.26   | 0.3   | 0.869  | 0.385 | 1.298 | 0.389 | 0.765  | 0.444 | 0.721 | 2.334 |
| SNRPE    | 0.534  | 0.303 | 1.765  | 0.078 | 1.706 | 0.516 | 1.367  | 0.171 | 0.943 | 3.087 |
| SNRPD3   | 0.585  | 0.306 | 1.915  | 0.055 | 1.795 | 0.549 | 1.45   | 0.147 | 0.986 | 3.268 |
| SNRPD2   | 0.189  | 0.295 | 0.641  | 0.521 | 1.208 | 0.357 | 0.584  | 0.559 | 0.677 | 2.156 |
| SNRPD1   | 0.356  | 0.298 | 1.195  | 0.232 | 1.427 | 0.425 | 1.006  | 0.314 | 0.796 | 2.558 |
| SNRPC    | 0.664  | 0.307 | 2.166  | 0.03  | 1.942 | 0.595 | 1.583  | 0.113 | 1.065 | 3.542 |
| SNRPB2   | 0.677  | 0.31  | 2.184  | 0.029 | 1.967 | 0.61  | 1.587  | 0.113 | 1.072 | 3.611 |
| SNRPB    | 0.371  | 0.3   | 1.238  | 0.216 | 1.449 | 0.434 | 1.034  | 0.301 | 0.805 | 2.607 |
| SNRPA1   | 0.686  | 0.306 | 2.246  | 0.025 | 1.987 | 0.607 | 1.625  | 0.104 | 1.091 | 3.616 |
| SNRPA    | 0.62   | 0.302 | 2.054  | 0.04  | 1.859 | 0.561 | 1.531  | 0.126 | 1.029 | 3.359 |
| SNRNP70  | -0.442 | 0.299 | -1.477 | 0.14  | 0.643 | 0.192 | -1.857 | 0.063 | 0.357 | 1.156 |
| SNRNP40  | 0.08   | 0.295 | 0.271  | 0.787 | 1.083 | 0.32  | 0.26   | 0.795 | 0.607 | 1.932 |
| SNRNP35  | 0.154  | 0.297 | 0.518  | 0.604 | 1.166 | 0.346 | 0.48   | 0.631 | 0.652 | 2.085 |
| SNRNP27  | 0.011  | 0.296 | 0.039  | 0.969 | 1.012 | 0.299 | 0.038  | 0.969 | 0.566 | 1.806 |
| SNRNP25  | -0.164 | 0.298 | -0.55  | 0.583 | 0.849 | 0.253 | -0.597 | 0.55  | 0.473 | 1.523 |
| SNRK     | -0.856 | 0.315 | -2.717 | 0.007 | 0.425 | 0.134 | -4.297 | 0     | 0.229 | 0.788 |
| SNPH     | -0.01  | 0.296 | -0.034 | 0.973 | 0.99  | 0.293 | -0.034 | 0.973 | 0.555 | 1.767 |
| SNORA21  | -0.197 | 0.297 | -0.664 | 0.506 | 0.821 | 0.244 | -0.734 | 0.463 | 0.459 | 1.469 |
| SNN      | 0.672  | 0.31  | 2.17   | 0.03  | 1.958 | 0.607 | 1.58   | 0.114 | 1.067 | 3.594 |
| SNIP1    | 0.085  | 0.295 | 0.287  | 0.774 | 1.088 | 0.321 | 0.275  | 0.783 | 0.61  | 1.942 |
| SNHG32   | 0.163  | 0.296 | 0.549  | 0.583 | 1.177 | 0.349 | 0.507  | 0.612 | 0.658 | 2.103 |
| SNHG17   | 0.161  | 0.298 | 0.539  | 0.59  | 1.175 | 0.35  | 0.498  | 0.618 | 0.655 | 2.108 |
| SNF8     | 0.489  | 0.306 | 1.597  | 0.11  | 1.63  | 0.499 | 1.263  | 0.206 | 0.895 | 2.969 |
| SNED1    | -0.262 | 0.296 | -0.886 | 0.376 | 0.769 | 0.228 | -1.013 | 0.311 | 0.43  | 1.375 |
| SND1-IT1 | 0.01   | 0.295 | 0.033  | 0.974 | 1.01  | 0.298 | 0.033  | 0.974 | 0.566 | 1.8   |
| SND1     | 0.011  | 0.297 | 0.036  | 0.971 | 1.011 | 0.3   | 0.036  | 0.971 | 0.565 | 1.808 |
| SNCG     | -0.31  | 0.298 | -1.04  | 0.298 | 0.734 | 0.218 | -1.22  | 0.223 | 0.409 | 1.315 |
| SNCB     | 0.208  | 0.296 | 0.703  | 0.482 | 1.232 | 0.365 | 0.635  | 0.525 | 0.689 | 2.201 |
| SNCAIP   | 0.044  | 0.295 | 0.149  | 0.881 | 1.045 | 0.309 | 0.146  | 0.884 | 0.586 | 1.864 |
| SNCA     | -0.173 | 0.296 | -0.583 | 0.56  | 0.841 | 0.249 | -0.636 | 0.525 | 0.471 | 1.504 |
| SNAPC5   | 0.308  | 0.3   | 1.026  | 0.305 | 1.361 | 0.408 | 0.883  | 0.377 | 0.756 | 2.45  |
| SNAPC4   | 0.444  | 0.302 | 1.47   | 0.141 | 1.56  | 0.471 | 1.187  | 0.235 | 0.862 | 2.82  |
| SNAPC3   | 0.632  | 0.303 | 2.085  | 0.037 | 1.882 | 0.571 | 1.545  | 0.122 | 1.039 | 3.409 |
| SNAPC2   | 0.068  | 0.296 | 0.231  | 0.817 | 1.071 | 0.317 | 0.223  | 0.823 | 0.6   | 1.912 |

|          |        |       |        |       |       |       |        |       |       |       |
|----------|--------|-------|--------|-------|-------|-------|--------|-------|-------|-------|
| SNAPC1   | 0.297  | 0.298 | 0.998  | 0.318 | 1.346 | 0.401 | 0.864  | 0.388 | 0.751 | 2.412 |
| SNAP91   | -0.208 | 0.296 | -0.701 | 0.483 | 0.813 | 0.241 | -0.779 | 0.436 | 0.455 | 1.452 |
| SNAP29   | 0.703  | 0.306 | 2.295  | 0.022 | 2.019 | 0.618 | 1.648  | 0.099 | 1.108 | 3.68  |
| SNAP25   | 0.453  | 0.303 | 1.496  | 0.135 | 1.573 | 0.477 | 1.203  | 0.229 | 0.869 | 2.849 |
| SNAP23   | -0.457 | 0.303 | -1.509 | 0.131 | 0.633 | 0.192 | -1.913 | 0.056 | 0.35  | 1.146 |
| SNAI2    | -0.794 | 0.31  | -2.559 | 0.01  | 0.452 | 0.14  | -3.908 | 0     | 0.246 | 0.83  |
| SNAI1    | -0.392 | 0.3   | -1.307 | 0.191 | 0.676 | 0.203 | -1.6   | 0.11  | 0.376 | 1.216 |
| SMYD5    | -0.02  | 0.295 | -0.066 | 0.947 | 0.981 | 0.289 | -0.067 | 0.946 | 0.55  | 1.748 |
| SMYD3    | -0.482 | 0.302 | -1.594 | 0.111 | 0.618 | 0.187 | -2.048 | 0.041 | 0.342 | 1.117 |
| SMYD2    | 0.984  | 0.322 | 3.055  | 0.002 | 2.674 | 0.861 | 1.945  | 0.052 | 1.423 | 5.025 |
| SMURF2   | 0.496  | 0.302 | 1.64   | 0.101 | 1.642 | 0.496 | 1.293  | 0.196 | 0.908 | 2.969 |
| SMURF1   | -0.499 | 0.306 | -1.631 | 0.103 | 0.607 | 0.186 | -2.115 | 0.034 | 0.334 | 1.106 |
| SMUG1    | 0.149  | 0.296 | 0.505  | 0.613 | 1.161 | 0.343 | 0.469  | 0.639 | 0.65  | 2.073 |
| SMU1     | -0.002 | 0.295 | -0.006 | 0.995 | 0.998 | 0.295 | -0.006 | 0.995 | 0.56  | 1.781 |
| SMTN     | -0.775 | 0.308 | -2.515 | 0.012 | 0.461 | 0.142 | -3.799 | 0     | 0.252 | 0.843 |
| SMS      | 0.297  | 0.298 | 0.998  | 0.318 | 1.346 | 0.4   | 0.864  | 0.388 | 0.751 | 2.411 |
| SMR3B    | -0.154 | 0.295 | -0.522 | 0.602 | 0.857 | 0.253 | -0.564 | 0.572 | 0.48  | 1.529 |
| SMR3A    | 0.494  | 0.301 | 1.638  | 0.101 | 1.639 | 0.494 | 1.293  | 0.196 | 0.908 | 2.959 |
| SMPX     | -0.07  | 0.296 | -0.235 | 0.814 | 0.933 | 0.276 | -0.244 | 0.808 | 0.523 | 1.665 |
| SMPDL3B  | 0.016  | 0.298 | 0.053  | 0.958 | 1.016 | 0.302 | 0.052  | 0.958 | 0.567 | 1.82  |
| SMPDL3A  | -0.655 | 0.31  | -2.114 | 0.034 | 0.52  | 0.161 | -2.986 | 0.003 | 0.283 | 0.953 |
| SMPD3    | -0.021 | 0.297 | -0.072 | 0.943 | 0.979 | 0.291 | -0.073 | 0.942 | 0.547 | 1.753 |
| SMPD2    | -0.644 | 0.31  | -2.081 | 0.037 | 0.525 | 0.163 | -2.921 | 0.003 | 0.286 | 0.963 |
| SMPD1    | -0.491 | 0.306 | -1.605 | 0.109 | 0.612 | 0.187 | -2.072 | 0.038 | 0.336 | 1.115 |
| SMOX     | 0.206  | 0.297 | 0.696  | 0.486 | 1.229 | 0.365 | 0.629  | 0.529 | 0.687 | 2.198 |
| SMO      | 0.298  | 0.297 | 1.002  | 0.316 | 1.347 | 0.4   | 0.867  | 0.386 | 0.752 | 2.412 |
| SMNDC1   | 0.155  | 0.296 | 0.525  | 0.599 | 1.168 | 0.345 | 0.487  | 0.627 | 0.654 | 2.084 |
| SMIM8    | 0.441  | 0.302 | 1.458  | 0.145 | 1.554 | 0.47  | 1.179  | 0.238 | 0.859 | 2.812 |
| SMIM7    | -0.474 | 0.302 | -1.569 | 0.117 | 0.622 | 0.188 | -2.007 | 0.045 | 0.344 | 1.125 |
| SMIM27   | 0.001  | 0.295 | 0.002  | 0.998 | 1.001 | 0.295 | 0.002  | 0.998 | 0.561 | 1.784 |
| SMIM2    | 0.143  | 0.295 | 0.484  | 0.628 | 1.154 | 0.341 | 0.451  | 0.652 | 0.647 | 2.058 |
| SMIM14   | 0.351  | 0.3   | 1.171  | 0.242 | 1.42  | 0.425 | 0.988  | 0.323 | 0.789 | 2.554 |
| SMIM10L1 | 0.506  | 0.3   | 1.684  | 0.092 | 1.658 | 0.498 | 1.322  | 0.186 | 0.921 | 2.988 |
| SMG9     | -0.657 | 0.31  | -2.12  | 0.034 | 0.519 | 0.161 | -2.997 | 0.003 | 0.283 | 0.952 |
| SMG8     | 0.155  | 0.296 | 0.523  | 0.601 | 1.168 | 0.346 | 0.485  | 0.628 | 0.653 | 2.088 |
| SMG7-AS1 | 0.377  | 0.298 | 1.266  | 0.206 | 1.458 | 0.434 | 1.055  | 0.292 | 0.813 | 2.613 |
| SMG7     | 0.141  | 0.299 | 0.473  | 0.636 | 1.152 | 0.344 | 0.441  | 0.659 | 0.641 | 2.069 |
| SMG6     | -0.397 | 0.3   | -1.325 | 0.185 | 0.672 | 0.202 | -1.626 | 0.104 | 0.374 | 1.21  |

|           |        |       |        |       |       |       |        |       |       |       |
|-----------|--------|-------|--------|-------|-------|-------|--------|-------|-------|-------|
| SMG5      | 0.147  | 0.296 | 0.497  | 0.619 | 1.159 | 0.343 | 0.462  | 0.644 | 0.648 | 2.071 |
| SMCP      | 0.42   | 0.3   | 1.401  | 0.161 | 1.522 | 0.456 | 1.144  | 0.253 | 0.846 | 2.737 |
| SMCO4     | 0.083  | 0.295 | 0.28   | 0.779 | 1.086 | 0.321 | 0.269  | 0.788 | 0.609 | 1.938 |
| SMCHD1    | -0.595 | 0.306 | -1.947 | 0.052 | 0.551 | 0.169 | -2.66  | 0.008 | 0.303 | 1.004 |
| SMC6      | 0.311  | 0.298 | 1.045  | 0.296 | 1.365 | 0.406 | 0.898  | 0.369 | 0.762 | 2.447 |
| SMC5      | 0.039  | 0.295 | 0.133  | 0.895 | 1.04  | 0.307 | 0.13   | 0.897 | 0.583 | 1.855 |
| SMC4      | 0.157  | 0.295 | 0.531  | 0.596 | 1.17  | 0.345 | 0.491  | 0.623 | 0.656 | 2.087 |
| SMC3      | 0.448  | 0.303 | 1.478  | 0.139 | 1.566 | 0.475 | 1.191  | 0.233 | 0.864 | 2.837 |
| SMC2      | 0.159  | 0.297 | 0.535  | 0.593 | 1.172 | 0.348 | 0.494  | 0.621 | 0.655 | 2.096 |
| SMC1A     | 0.28   | 0.301 | 0.931  | 0.352 | 1.323 | 0.398 | 0.812  | 0.417 | 0.734 | 2.385 |
| SMARCE1   | 0.81   | 0.311 | 2.608  | 0.009 | 2.248 | 0.698 | 1.788  | 0.074 | 1.223 | 4.132 |
| SMARCD3   | -0.244 | 0.297 | -0.819 | 0.413 | 0.784 | 0.233 | -0.928 | 0.354 | 0.437 | 1.404 |
| SMARCD2   | 0.121  | 0.295 | 0.411  | 0.681 | 1.129 | 0.333 | 0.387  | 0.699 | 0.633 | 2.014 |
| SMARCD1   | 0.203  | 0.296 | 0.687  | 0.492 | 1.226 | 0.363 | 0.622  | 0.534 | 0.686 | 2.19  |
| SMARCC2   | -0.162 | 0.296 | -0.547 | 0.584 | 0.85  | 0.252 | -0.594 | 0.552 | 0.476 | 1.52  |
| SMARCC1   | 0.379  | 0.3   | 1.265  | 0.206 | 1.461 | 0.438 | 1.052  | 0.293 | 0.812 | 2.63  |
| SMARCB1   | -0.206 | 0.297 | -0.694 | 0.487 | 0.814 | 0.241 | -0.771 | 0.441 | 0.455 | 1.455 |
| SMARCAL1  | 0.173  | 0.296 | 0.582  | 0.56  | 1.188 | 0.352 | 0.535  | 0.593 | 0.665 | 2.124 |
| SMARCA5   | -0.123 | 0.296 | -0.416 | 0.678 | 0.884 | 0.262 | -0.442 | 0.658 | 0.495 | 1.581 |
| SMARCA4   | -0.257 | 0.299 | -0.86  | 0.39  | 0.773 | 0.231 | -0.98  | 0.327 | 0.43  | 1.39  |
| SMARCA2   | -0.654 | 0.31  | -2.11  | 0.035 | 0.52  | 0.161 | -2.978 | 0.003 | 0.283 | 0.955 |
| SMARCA1   | -0.064 | 0.296 | -0.216 | 0.829 | 0.938 | 0.278 | -0.223 | 0.823 | 0.525 | 1.675 |
| SMAP1     | 0.573  | 0.302 | 1.894  | 0.058 | 1.773 | 0.536 | 1.442  | 0.149 | 0.98  | 3.208 |
| SMAGP     | -0.125 | 0.296 | -0.422 | 0.673 | 0.883 | 0.261 | -0.45  | 0.653 | 0.495 | 1.575 |
| SMAD9     | -0.389 | 0.3   | -1.3   | 0.194 | 0.677 | 0.203 | -1.59  | 0.112 | 0.377 | 1.219 |
| SMAD7     | -0.048 | 0.297 | -0.161 | 0.872 | 0.953 | 0.283 | -0.164 | 0.869 | 0.533 | 1.706 |
| SMAD6     | 0.63   | 0.305 | 2.062  | 0.039 | 1.877 | 0.574 | 1.53   | 0.126 | 1.032 | 3.417 |
| SMAD5-AS1 | 0.017  | 0.297 | 0.058  | 0.954 | 1.017 | 0.302 | 0.057  | 0.954 | 0.568 | 1.822 |
| SMAD5     | 0.016  | 0.295 | 0.053  | 0.958 | 1.016 | 0.3   | 0.052  | 0.958 | 0.57  | 1.811 |
| SMAD4     | -0.53  | 0.305 | -1.734 | 0.083 | 0.589 | 0.18  | -2.286 | 0.022 | 0.324 | 1.072 |
| SMAD3     | -0.109 | 0.295 | -0.371 | 0.711 | 0.896 | 0.265 | -0.392 | 0.695 | 0.502 | 1.599 |
| SMAD2     | -0.341 | 0.3   | -1.137 | 0.255 | 0.711 | 0.213 | -1.355 | 0.175 | 0.395 | 1.279 |
| SMAD1     | -0.524 | 0.306 | -1.714 | 0.087 | 0.592 | 0.181 | -2.252 | 0.024 | 0.325 | 1.078 |
| SLURP1    | 0.088  | 0.296 | 0.297  | 0.767 | 1.092 | 0.323 | 0.284  | 0.776 | 0.612 | 1.948 |
| SLTM      | 0.042  | 0.295 | 0.144  | 0.886 | 1.043 | 0.308 | 0.141  | 0.888 | 0.585 | 1.861 |
| SLPI      | 0.229  | 0.298 | 0.768  | 0.442 | 1.257 | 0.375 | 0.686  | 0.492 | 0.701 | 2.256 |
| SLN       | -0.3   | 0.297 | -1.009 | 0.313 | 0.741 | 0.22  | -1.177 | 0.239 | 0.414 | 1.327 |
| SLK       | -0.111 | 0.297 | -0.373 | 0.71  | 0.895 | 0.266 | -0.394 | 0.694 | 0.5   | 1.603 |

|          |        |       |        |       |       |       |        |       |       |       |
|----------|--------|-------|--------|-------|-------|-------|--------|-------|-------|-------|
| SLITRK5  | 0.565  | 0.303 | 1.865  | 0.062 | 1.759 | 0.533 | 1.425  | 0.154 | 0.972 | 3.185 |
| SLITRK3  | -0.765 | 0.31  | -2.464 | 0.014 | 0.465 | 0.144 | -3.702 | 0     | 0.253 | 0.855 |
| SLIT3    | -0.172 | 0.296 | -0.582 | 0.561 | 0.842 | 0.249 | -0.635 | 0.526 | 0.471 | 1.504 |
| SLIT2    | -0.488 | 0.3   | -1.629 | 0.103 | 0.614 | 0.184 | -2.101 | 0.036 | 0.341 | 1.104 |
| SLIT1    | 0.159  | 0.3   | 0.529  | 0.597 | 1.172 | 0.351 | 0.489  | 0.625 | 0.651 | 2.109 |
| SLIRP    | 0.638  | 0.304 | 2.096  | 0.036 | 1.893 | 0.576 | 1.55   | 0.121 | 1.042 | 3.438 |
| SLFN12   | -0.499 | 0.3   | -1.664 | 0.096 | 0.607 | 0.182 | -2.158 | 0.031 | 0.337 | 1.093 |
| SLF2     | -0.467 | 0.301 | -1.553 | 0.12  | 0.627 | 0.189 | -1.98  | 0.048 | 0.347 | 1.13  |
| SLCO5A1  | 0.119  | 0.295 | 0.405  | 0.686 | 1.127 | 0.333 | 0.381  | 0.703 | 0.632 | 2.011 |
| SLCO4C1  | 0.274  | 0.297 | 0.922  | 0.356 | 1.315 | 0.39  | 0.807  | 0.42  | 0.735 | 2.351 |
| SLCO4A1  | 0.009  | 0.295 | 0.029  | 0.977 | 1.009 | 0.298 | 0.029  | 0.977 | 0.565 | 1.799 |
| SLCO3A1  | -0.021 | 0.295 | -0.073 | 0.942 | 0.979 | 0.289 | -0.074 | 0.941 | 0.549 | 1.745 |
| SLCO2B1  | -0.218 | 0.297 | -0.736 | 0.462 | 0.804 | 0.238 | -0.822 | 0.411 | 0.449 | 1.438 |
| SLCO2A1  | 0.058  | 0.295 | 0.198  | 0.843 | 1.06  | 0.313 | 0.192  | 0.848 | 0.594 | 1.891 |
| SLCO1C1  | -0.263 | 0.298 | -0.883 | 0.377 | 0.769 | 0.229 | -1.01  | 0.312 | 0.429 | 1.378 |
| SLCO1B3  | 0.247  | 0.297 | 0.833  | 0.405 | 1.28  | 0.38  | 0.738  | 0.46  | 0.716 | 2.289 |
| SLCO1B1  | -0.099 | 0.295 | -0.336 | 0.737 | 0.905 | 0.267 | -0.354 | 0.724 | 0.508 | 1.615 |
| SLCO1A2  | -0.159 | 0.296 | -0.537 | 0.591 | 0.853 | 0.253 | -0.582 | 0.56  | 0.477 | 1.524 |
| SLC9A8   | 0.348  | 0.3   | 1.162  | 0.245 | 1.416 | 0.424 | 0.981  | 0.327 | 0.787 | 2.548 |
| SLC9A7   | -0.237 | 0.296 | -0.8   | 0.424 | 0.789 | 0.234 | -0.902 | 0.367 | 0.442 | 1.41  |
| SLC9A6   | -0.229 | 0.296 | -0.773 | 0.44  | 0.795 | 0.236 | -0.868 | 0.385 | 0.445 | 1.422 |
| SLC9A5   | 0.121  | 0.297 | 0.409  | 0.683 | 1.129 | 0.335 | 0.385  | 0.7   | 0.631 | 2.02  |
| SLC9A3R2 | -0.43  | 0.3   | -1.436 | 0.151 | 0.65  | 0.195 | -1.794 | 0.073 | 0.361 | 1.17  |
| SLC9A3R1 | 0.394  | 0.298 | 1.324  | 0.185 | 1.483 | 0.442 | 1.094  | 0.274 | 0.828 | 2.659 |
| SLC9A3   | -0.624 | 0.31  | -2.013 | 0.044 | 0.536 | 0.166 | -2.795 | 0.005 | 0.292 | 0.984 |
| SLC9A2   | 0.085  | 0.296 | 0.289  | 0.773 | 1.089 | 0.322 | 0.277  | 0.782 | 0.61  | 1.945 |
| SLC9A1   | -0.259 | 0.298 | -0.869 | 0.385 | 0.772 | 0.23  | -0.992 | 0.321 | 0.431 | 1.384 |
| SLC8B1   | -1.12  | 0.336 | -3.333 | 0.001 | 0.326 | 0.11  | -6.145 | 0     | 0.169 | 0.63  |
| SLC8A2   | 0.236  | 0.296 | 0.798  | 0.425 | 1.266 | 0.375 | 0.71   | 0.477 | 0.709 | 2.263 |
| SLC8A1   | -0.1   | 0.295 | -0.338 | 0.736 | 0.905 | 0.267 | -0.355 | 0.723 | 0.507 | 1.615 |
| SLC7A9   | 0.072  | 0.297 | 0.243  | 0.808 | 1.075 | 0.32  | 0.235  | 0.814 | 0.6   | 1.926 |
| SLC7A8   | -0.095 | 0.295 | -0.323 | 0.747 | 0.909 | 0.268 | -0.339 | 0.735 | 0.51  | 1.622 |
| SLC7A7   | 0.218  | 0.296 | 0.738  | 0.461 | 1.244 | 0.368 | 0.663  | 0.508 | 0.697 | 2.221 |
| SLC7A6   | 0.454  | 0.303 | 1.499  | 0.134 | 1.574 | 0.477 | 1.205  | 0.228 | 0.87  | 2.85  |
| SLC7A5   | 0.608  | 0.311 | 1.957  | 0.05  | 1.836 | 0.57  | 1.466  | 0.143 | 0.999 | 3.375 |
| SLC7A4   | 0.225  | 0.298 | 0.755  | 0.45  | 1.252 | 0.373 | 0.676  | 0.499 | 0.699 | 2.244 |
| SLC7A2   | -0.743 | 0.315 | -2.36  | 0.018 | 0.476 | 0.15  | -3.501 | 0     | 0.257 | 0.882 |
| SLC7A11  | 0.024  | 0.295 | 0.08   | 0.936 | 1.024 | 0.302 | 0.079  | 0.937 | 0.574 | 1.825 |

|         |        |       |        |       |       |       |        |       |       |       |
|---------|--------|-------|--------|-------|-------|-------|--------|-------|-------|-------|
| SLC7A10 | 0.055  | 0.295 | 0.185  | 0.853 | 1.056 | 0.312 | 0.18   | 0.857 | 0.592 | 1.884 |
| SLC7A1  | 0.496  | 0.306 | 1.618  | 0.106 | 1.641 | 0.503 | 1.276  | 0.202 | 0.9   | 2.992 |
| SLC6A9  | -0.406 | 0.302 | -1.344 | 0.179 | 0.666 | 0.201 | -1.658 | 0.097 | 0.368 | 1.205 |
| SLC6A8  | 0.337  | 0.298 | 1.131  | 0.258 | 1.4   | 0.417 | 0.961  | 0.337 | 0.782 | 2.509 |
| SLC6A7  | 0.211  | 0.296 | 0.712  | 0.476 | 1.235 | 0.366 | 0.642  | 0.521 | 0.691 | 2.206 |
| SLC6A6  | 0.14   | 0.296 | 0.473  | 0.636 | 1.151 | 0.341 | 0.442  | 0.659 | 0.644 | 2.056 |
| SLC6A5  | 0.139  | 0.296 | 0.47   | 0.639 | 1.149 | 0.341 | 0.438  | 0.661 | 0.643 | 2.055 |
| SLC6A4  | -0.552 | 0.303 | -1.823 | 0.068 | 0.576 | 0.174 | -2.433 | 0.015 | 0.318 | 1.042 |
| SLC6A3  | -0.138 | 0.296 | -0.467 | 0.641 | 0.871 | 0.258 | -0.501 | 0.617 | 0.487 | 1.557 |
| SLC6A20 | 0.018  | 0.295 | 0.062  | 0.951 | 1.018 | 0.301 | 0.061  | 0.951 | 0.571 | 1.817 |
| SLC6A2  | -0.082 | 0.295 | -0.278 | 0.781 | 0.921 | 0.272 | -0.29  | 0.772 | 0.516 | 1.644 |
| SLC6A16 | 0.257  | 0.298 | 0.865  | 0.387 | 1.294 | 0.385 | 0.763  | 0.446 | 0.722 | 2.318 |
| SLC6A15 | -0.351 | 0.3   | -1.172 | 0.241 | 0.704 | 0.211 | -1.404 | 0.16  | 0.391 | 1.266 |
| SLC6A14 | -0.051 | 0.297 | -0.172 | 0.863 | 0.95  | 0.282 | -0.177 | 0.86  | 0.531 | 1.7   |
| SLC6A13 | 0.243  | 0.298 | 0.814  | 0.415 | 1.274 | 0.38  | 0.723  | 0.47  | 0.711 | 2.285 |
| SLC6A12 | -0.01  | 0.295 | -0.034 | 0.973 | 0.99  | 0.292 | -0.034 | 0.973 | 0.555 | 1.767 |
| SLC6A11 | -0.178 | 0.296 | -0.601 | 0.548 | 0.837 | 0.248 | -0.658 | 0.51  | 0.469 | 1.495 |
| SLC6A1  | -0.247 | 0.298 | -0.829 | 0.407 | 0.781 | 0.233 | -0.94  | 0.347 | 0.436 | 1.4   |
| SLC66A3 | 0.133  | 0.295 | 0.449  | 0.653 | 1.142 | 0.337 | 0.421  | 0.674 | 0.64  | 2.037 |
| SLC66A2 | -0.024 | 0.298 | -0.08  | 0.936 | 0.976 | 0.291 | -0.081 | 0.936 | 0.545 | 1.751 |
| SLC66A1 | -0.116 | 0.295 | -0.392 | 0.695 | 0.891 | 0.263 | -0.415 | 0.678 | 0.499 | 1.589 |
| SLC5A7  | 0.343  | 0.298 | 1.152  | 0.249 | 1.409 | 0.42  | 0.975  | 0.329 | 0.786 | 2.527 |
| SLC5A6  | -0.037 | 0.296 | -0.125 | 0.9   | 0.964 | 0.285 | -0.128 | 0.898 | 0.539 | 1.721 |
| SLC5A5  | -0.538 | 0.303 | -1.778 | 0.075 | 0.584 | 0.177 | -2.355 | 0.019 | 0.323 | 1.057 |
| SLC5A4  | -0.113 | 0.295 | -0.383 | 0.702 | 0.893 | 0.264 | -0.405 | 0.685 | 0.501 | 1.593 |
| SLC5A3  | -0.291 | 0.297 | -0.977 | 0.328 | 0.748 | 0.222 | -1.134 | 0.257 | 0.417 | 1.339 |
| SLC5A2  | -0.438 | 0.301 | -1.457 | 0.145 | 0.645 | 0.194 | -1.829 | 0.067 | 0.358 | 1.163 |
| SLC5A12 | -0.105 | 0.296 | -0.355 | 0.722 | 0.9   | 0.267 | -0.375 | 0.708 | 0.504 | 1.608 |
| SLC5A1  | 0.325  | 0.3   | 1.085  | 0.278 | 1.384 | 0.415 | 0.926  | 0.354 | 0.769 | 2.489 |
| SLC52A2 | 0.891  | 0.321 | 2.78   | 0.005 | 2.438 | 0.782 | 1.84   | 0.066 | 1.301 | 4.571 |
| SLC52A1 | 0.267  | 0.297 | 0.902  | 0.367 | 1.306 | 0.387 | 0.791  | 0.429 | 0.731 | 2.336 |
| SLC50A1 | -0.147 | 0.298 | -0.492 | 0.622 | 0.864 | 0.257 | -0.53  | 0.596 | 0.481 | 1.549 |
| SLC4A8  | -0.352 | 0.3   | -1.175 | 0.24  | 0.703 | 0.211 | -1.408 | 0.159 | 0.391 | 1.265 |
| SLC4A7  | -0.586 | 0.304 | -1.93  | 0.054 | 0.557 | 0.169 | -2.624 | 0.009 | 0.307 | 1.009 |
| SLC4A5  | 0.332  | 0.298 | 1.117  | 0.264 | 1.394 | 0.415 | 0.95   | 0.342 | 0.778 | 2.498 |
| SLC4A4  | -0.03  | 0.295 | -0.102 | 0.919 | 0.97  | 0.287 | -0.104 | 0.917 | 0.544 | 1.731 |
| SLC4A3  | 0.354  | 0.298 | 1.191  | 0.234 | 1.425 | 0.424 | 1.003  | 0.316 | 0.795 | 2.555 |
| SLC4A2  | -0.457 | 0.302 | -1.511 | 0.131 | 0.633 | 0.191 | -1.916 | 0.055 | 0.35  | 1.145 |

|          |        |       |        |       |       |       |        |       |       |       |
|----------|--------|-------|--------|-------|-------|-------|--------|-------|-------|-------|
| SLC4A1AP | 0.507  | 0.302 | 1.678  | 0.093 | 1.661 | 0.502 | 1.316  | 0.188 | 0.918 | 3.005 |
| SLC4A10  | -0.179 | 0.295 | -0.608 | 0.543 | 0.836 | 0.247 | -0.666 | 0.506 | 0.468 | 1.491 |
| SLC4A1   | 0.257  | 0.296 | 0.867  | 0.386 | 1.293 | 0.383 | 0.764  | 0.445 | 0.723 | 2.311 |
| SLC49A3  | -0.21  | 0.299 | -0.704 | 0.482 | 0.811 | 0.242 | -0.783 | 0.434 | 0.451 | 1.455 |
| SLC48A1  | -0.635 | 0.304 | -2.092 | 0.036 | 0.53  | 0.161 | -2.923 | 0.003 | 0.292 | 0.961 |
| SLC47A1  | -0.292 | 0.298 | -0.982 | 0.326 | 0.747 | 0.222 | -1.14  | 0.254 | 0.417 | 1.338 |
| SLC46A3  | 0.559  | 0.303 | 1.846  | 0.065 | 1.749 | 0.53  | 1.414  | 0.157 | 0.966 | 3.166 |
| SLC45A2  | -0.472 | 0.302 | -1.561 | 0.118 | 0.624 | 0.189 | -1.995 | 0.046 | 0.345 | 1.128 |
| SLC44A4  | -0.472 | 0.302 | -1.563 | 0.118 | 0.623 | 0.188 | -1.998 | 0.046 | 0.345 | 1.127 |
| SLC44A1  | 0.316  | 0.297 | 1.065  | 0.287 | 1.372 | 0.407 | 0.913  | 0.361 | 0.767 | 2.454 |
| SLC43A3  | 0.02   | 0.297 | 0.067  | 0.947 | 1.02  | 0.303 | 0.066  | 0.947 | 0.57  | 1.825 |
| SLC43A1  | -0.137 | 0.296 | -0.465 | 0.642 | 0.872 | 0.258 | -0.498 | 0.618 | 0.488 | 1.556 |
| SLC41A3  | 0.242  | 0.296 | 0.816  | 0.414 | 1.274 | 0.377 | 0.725  | 0.468 | 0.713 | 2.276 |
| SLC3A2   | 0.437  | 0.298 | 1.465  | 0.143 | 1.548 | 0.461 | 1.187  | 0.235 | 0.863 | 2.776 |
| SLC3A1   | 0.227  | 0.296 | 0.766  | 0.444 | 1.255 | 0.372 | 0.685  | 0.493 | 0.702 | 2.242 |
| SLC39A9  | -0.252 | 0.298 | -0.847 | 0.397 | 0.777 | 0.231 | -0.964 | 0.335 | 0.434 | 1.393 |
| SLC39A8  | 0.393  | 0.3   | 1.312  | 0.189 | 1.482 | 0.444 | 1.085  | 0.278 | 0.824 | 2.666 |
| SLC39A7  | 0.728  | 0.311 | 2.343  | 0.019 | 2.071 | 0.643 | 1.664  | 0.096 | 1.126 | 3.807 |
| SLC39A6  | -0.374 | 0.3   | -1.248 | 0.212 | 0.688 | 0.206 | -1.514 | 0.13  | 0.382 | 1.238 |
| SLC39A4  | 0.296  | 0.296 | 1      | 0.317 | 1.345 | 0.399 | 0.865  | 0.387 | 0.752 | 2.405 |
| SLC39A2  | 0.031  | 0.295 | 0.107  | 0.915 | 1.032 | 0.304 | 0.105  | 0.916 | 0.579 | 1.84  |
| SLC39A14 | 0.015  | 0.296 | 0.049  | 0.961 | 1.015 | 0.3   | 0.049  | 0.961 | 0.568 | 1.811 |
| SLC39A1  | -0.437 | 0.302 | -1.447 | 0.148 | 0.646 | 0.195 | -1.815 | 0.069 | 0.357 | 1.168 |
| SLC38A7  | 0.392  | 0.3   | 1.307  | 0.191 | 1.48  | 0.443 | 1.082  | 0.279 | 0.822 | 2.662 |
| SLC38A6  | -0.425 | 0.302 | -1.407 | 0.159 | 0.653 | 0.198 | -1.754 | 0.079 | 0.361 | 1.182 |
| SLC38A4  | -0.73  | 0.31  | -2.354 | 0.019 | 0.482 | 0.149 | -3.466 | 0.001 | 0.263 | 0.885 |
| SLC38A3  | 0.119  | 0.299 | 0.398  | 0.691 | 1.126 | 0.337 | 0.375  | 0.707 | 0.627 | 2.024 |
| SLC38A2  | -0.47  | 0.301 | -1.561 | 0.119 | 0.625 | 0.188 | -1.992 | 0.046 | 0.347 | 1.128 |
| SLC38A10 | -0.446 | 0.3   | -1.488 | 0.137 | 0.64  | 0.192 | -1.876 | 0.061 | 0.356 | 1.152 |
| SLC38A1  | -0.453 | 0.301 | -1.507 | 0.132 | 0.636 | 0.191 | -1.907 | 0.057 | 0.353 | 1.146 |
| SLC37A4  | 0.368  | 0.298 | 1.238  | 0.216 | 1.446 | 0.43  | 1.036  | 0.3   | 0.807 | 2.59  |
| SLC37A1  | 0.004  | 0.296 | 0.015  | 0.988 | 1.004 | 0.298 | 0.015  | 0.988 | 0.562 | 1.795 |
| SLC36A1  | 0.426  | 0.3   | 1.423  | 0.155 | 1.531 | 0.459 | 1.159  | 0.247 | 0.851 | 2.755 |
| SLC35G2  | 0.12   | 0.295 | 0.407  | 0.684 | 1.128 | 0.333 | 0.384  | 0.701 | 0.632 | 2.011 |
| SLC35F6  | 0.316  | 0.3   | 1.055  | 0.291 | 1.372 | 0.411 | 0.904  | 0.366 | 0.763 | 2.467 |
| SLC35F5  | -0.207 | 0.298 | -0.695 | 0.487 | 0.813 | 0.242 | -0.772 | 0.44  | 0.453 | 1.458 |
| SLC35F2  | 0.063  | 0.295 | 0.215  | 0.83  | 1.065 | 0.314 | 0.208  | 0.835 | 0.598 | 1.9   |
| SLC35E3  | 0.342  | 0.298 | 1.148  | 0.251 | 1.408 | 0.42  | 0.972  | 0.331 | 0.785 | 2.526 |



|          |        |       |        |       |       |       |        |       |       |       |
|----------|--------|-------|--------|-------|-------|-------|--------|-------|-------|-------|
| SLC35E1  | 0.234  | 0.301 | 0.776  | 0.437 | 1.263 | 0.381 | 0.692  | 0.489 | 0.7   | 2.28  |
| SLC35D2  | -0.622 | 0.306 | -2.032 | 0.042 | 0.537 | 0.164 | -2.818 | 0.005 | 0.295 | 0.978 |
| SLC35D1  | -0.453 | 0.302 | -1.498 | 0.134 | 0.636 | 0.192 | -1.895 | 0.058 | 0.352 | 1.15  |
| SLC35C2  | 0.473  | 0.302 | 1.563  | 0.118 | 1.604 | 0.485 | 1.245  | 0.213 | 0.887 | 2.901 |
| SLC35C1  | 0.211  | 0.298 | 0.708  | 0.479 | 1.235 | 0.369 | 0.639  | 0.523 | 0.688 | 2.217 |
| SLC35B1  | -0.259 | 0.298 | -0.87  | 0.384 | 0.772 | 0.23  | -0.994 | 0.32  | 0.43  | 1.383 |
| SLC35A5  | -0.125 | 0.296 | -0.421 | 0.674 | 0.883 | 0.262 | -0.448 | 0.654 | 0.494 | 1.578 |
| SLC35A3  | 0.115  | 0.296 | 0.387  | 0.699 | 1.122 | 0.332 | 0.366  | 0.714 | 0.628 | 2.004 |
| SLC35A2  | 0.515  | 0.303 | 1.701  | 0.089 | 1.673 | 0.506 | 1.329  | 0.184 | 0.925 | 3.027 |
| SLC35A1  | 0.286  | 0.298 | 0.961  | 0.337 | 1.331 | 0.396 | 0.836  | 0.403 | 0.743 | 2.386 |
| SLC34A2  | -0.109 | 0.295 | -0.371 | 0.711 | 0.896 | 0.265 | -0.392 | 0.695 | 0.502 | 1.599 |
| SLC34A1  | -0.255 | 0.296 | -0.86  | 0.39  | 0.775 | 0.23  | -0.98  | 0.327 | 0.433 | 1.385 |
| SLC33A1  | 0.341  | 0.3   | 1.135  | 0.256 | 1.406 | 0.422 | 0.962  | 0.336 | 0.781 | 2.533 |
| SLC31A2  | -0.2   | 0.296 | -0.675 | 0.5   | 0.819 | 0.243 | -0.747 | 0.455 | 0.458 | 1.464 |
| SLC31A1  | 0.536  | 0.302 | 1.772  | 0.076 | 1.709 | 0.517 | 1.372  | 0.17  | 0.945 | 3.091 |
| SLC30A9  | -0.086 | 0.297 | -0.288 | 0.773 | 0.918 | 0.272 | -0.301 | 0.763 | 0.513 | 1.642 |
| SLC30A6  | -0.054 | 0.295 | -0.184 | 0.854 | 0.947 | 0.28  | -0.189 | 0.85  | 0.531 | 1.69  |
| SLC30A5  | -0.126 | 0.298 | -0.424 | 0.672 | 0.881 | 0.263 | -0.452 | 0.651 | 0.491 | 1.581 |
| SLC30A4  | -0.084 | 0.295 | -0.283 | 0.777 | 0.92  | 0.272 | -0.295 | 0.768 | 0.516 | 1.641 |
| SLC30A3  | 0.242  | 0.296 | 0.817  | 0.414 | 1.274 | 0.377 | 0.725  | 0.468 | 0.713 | 2.276 |
| SLC30A10 | 0.076  | 0.297 | 0.256  | 0.798 | 1.079 | 0.32  | 0.246  | 0.805 | 0.603 | 1.929 |
| SLC30A1  | -0.485 | 0.302 | -1.605 | 0.108 | 0.615 | 0.186 | -2.066 | 0.039 | 0.34  | 1.113 |
| SLC2A9   | 0.24   | 0.296 | 0.811  | 0.417 | 1.272 | 0.377 | 0.721  | 0.471 | 0.712 | 2.273 |
| SLC2A8   | 0.222  | 0.298 | 0.743  | 0.457 | 1.248 | 0.373 | 0.667  | 0.505 | 0.696 | 2.241 |
| SLC2A6   | 0.604  | 0.303 | 1.993  | 0.046 | 1.83  | 0.555 | 1.496  | 0.135 | 1.01  | 3.315 |
| SLC2A5   | -0.143 | 0.297 | -0.483 | 0.629 | 0.867 | 0.257 | -0.519 | 0.604 | 0.484 | 1.55  |
| SLC2A4RG | 0.329  | 0.298 | 1.105  | 0.269 | 1.389 | 0.413 | 0.942  | 0.346 | 0.775 | 2.489 |
| SLC2A4   | 0.006  | 0.295 | 0.02   | 0.984 | 1.006 | 0.297 | 0.02   | 0.984 | 0.564 | 1.794 |
| SLC2A3   | -0.129 | 0.296 | -0.435 | 0.664 | 0.879 | 0.26  | -0.464 | 0.643 | 0.493 | 1.569 |
| SLC2A2   | 0.269  | 0.297 | 0.906  | 0.365 | 1.309 | 0.389 | 0.794  | 0.427 | 0.731 | 2.345 |
| SLC2A11  | -0.071 | 0.298 | -0.238 | 0.812 | 0.932 | 0.278 | -0.247 | 0.805 | 0.52  | 1.67  |
| SLC2A10  | 0.048  | 0.295 | 0.162  | 0.871 | 1.049 | 0.31  | 0.158  | 0.874 | 0.588 | 1.871 |
| SLC2A1   | -0.009 | 0.296 | -0.029 | 0.977 | 0.991 | 0.293 | -0.03  | 0.976 | 0.555 | 1.771 |
| SLC29A3  | -0.504 | 0.306 | -1.648 | 0.099 | 0.604 | 0.185 | -2.142 | 0.032 | 0.332 | 1.1   |
| SLC29A2  | 0.208  | 0.296 | 0.702  | 0.483 | 1.231 | 0.365 | 0.634  | 0.526 | 0.689 | 2.2   |
| SLC29A1  | -0.076 | 0.295 | -0.259 | 0.796 | 0.926 | 0.274 | -0.269 | 0.788 | 0.519 | 1.653 |
| SLC28A3  | 0.081  | 0.297 | 0.273  | 0.785 | 1.084 | 0.322 | 0.262  | 0.793 | 0.606 | 1.941 |
| SLC28A2  | -0.207 | 0.296 | -0.7   | 0.484 | 0.813 | 0.241 | -0.778 | 0.437 | 0.455 | 1.452 |

|          |        |       |        |       |       |       |        |       |       |       |
|----------|--------|-------|--------|-------|-------|-------|--------|-------|-------|-------|
| SLC28A1  | 0.24   | 0.296 | 0.812  | 0.417 | 1.272 | 0.377 | 0.722  | 0.47  | 0.712 | 2.273 |
| SLC27A6  | 0.083  | 0.295 | 0.283  | 0.777 | 1.087 | 0.321 | 0.271  | 0.786 | 0.61  | 1.938 |
| SLC27A5  | 0.071  | 0.295 | 0.24   | 0.81  | 1.074 | 0.317 | 0.232  | 0.817 | 0.602 | 1.915 |
| SLC27A3  | 0.146  | 0.297 | 0.491  | 0.623 | 1.157 | 0.343 | 0.457  | 0.647 | 0.647 | 2.069 |
| SLC27A2  | -0.295 | 0.3   | -0.983 | 0.326 | 0.745 | 0.224 | -1.143 | 0.253 | 0.413 | 1.341 |
| SLC26A4  | 0.214  | 0.296 | 0.723  | 0.47  | 1.239 | 0.367 | 0.651  | 0.515 | 0.693 | 2.214 |
| SLC26A3  | -0.676 | 0.31  | -2.184 | 0.029 | 0.508 | 0.158 | -3.121 | 0.002 | 0.277 | 0.933 |
| SLC26A2  | 0.674  | 0.306 | 2.202  | 0.028 | 1.963 | 0.601 | 1.602  | 0.109 | 1.077 | 3.577 |
| SLC26A10 | 0.016  | 0.295 | 0.053  | 0.958 | 1.016 | 0.3   | 0.052  | 0.958 | 0.57  | 1.811 |
| SLC26A1  | 0.438  | 0.3   | 1.462  | 0.144 | 1.55  | 0.465 | 1.183  | 0.237 | 0.861 | 2.789 |
| SLC25A6  | -0.381 | 0.3   | -1.27  | 0.204 | 0.683 | 0.205 | -1.546 | 0.122 | 0.38  | 1.23  |
| SLC25A5  | 0.693  | 0.306 | 2.266  | 0.023 | 2     | 0.612 | 1.635  | 0.102 | 1.098 | 3.642 |
| SLC25A46 | 0.72   | 0.306 | 2.353  | 0.019 | 2.054 | 0.628 | 1.677  | 0.093 | 1.128 | 3.741 |
| SLC25A44 | 0.182  | 0.296 | 0.616  | 0.538 | 1.2   | 0.355 | 0.563  | 0.574 | 0.672 | 2.143 |
| SLC25A42 | 0.567  | 0.303 | 1.874  | 0.061 | 1.763 | 0.533 | 1.43   | 0.153 | 0.974 | 3.19  |
| SLC25A40 | -0.067 | 0.297 | -0.226 | 0.821 | 0.935 | 0.278 | -0.234 | 0.815 | 0.522 | 1.673 |
| SLC25A4  | 0.509  | 0.301 | 1.693  | 0.091 | 1.663 | 0.5   | 1.327  | 0.185 | 0.923 | 2.998 |
| SLC25A38 | -0.022 | 0.296 | -0.074 | 0.941 | 0.978 | 0.289 | -0.075 | 0.94  | 0.548 | 1.747 |
| SLC25A37 | 0.026  | 0.296 | 0.088  | 0.93  | 1.027 | 0.304 | 0.087  | 0.93  | 0.574 | 1.835 |
| SLC25A36 | -0.393 | 0.298 | -1.318 | 0.187 | 0.675 | 0.201 | -1.615 | 0.106 | 0.376 | 1.211 |
| SLC25A32 | 0.336  | 0.298 | 1.13   | 0.259 | 1.4   | 0.416 | 0.96   | 0.337 | 0.781 | 2.508 |
| SLC25A31 | -0.363 | 0.3   | -1.212 | 0.226 | 0.696 | 0.208 | -1.461 | 0.144 | 0.387 | 1.251 |
| SLC25A3  | -0.368 | 0.3   | -1.228 | 0.22  | 0.692 | 0.208 | -1.484 | 0.138 | 0.384 | 1.246 |
| SLC25A28 | -0.192 | 0.298 | -0.644 | 0.519 | 0.825 | 0.246 | -0.71  | 0.477 | 0.46  | 1.48  |
| SLC25A24 | 0.14   | 0.295 | 0.473  | 0.636 | 1.15  | 0.34  | 0.441  | 0.659 | 0.644 | 2.052 |
| SLC25A23 | -0.213 | 0.298 | -0.714 | 0.475 | 0.808 | 0.241 | -0.796 | 0.426 | 0.451 | 1.45  |
| SLC25A22 | 0.267  | 0.298 | 0.897  | 0.37  | 1.306 | 0.389 | 0.787  | 0.431 | 0.729 | 2.342 |
| SLC25A21 | -0.073 | 0.295 | -0.246 | 0.805 | 0.93  | 0.275 | -0.256 | 0.798 | 0.521 | 1.659 |
| SLC25A20 | 0.268  | 0.298 | 0.9    | 0.368 | 1.307 | 0.389 | 0.79   | 0.43  | 0.729 | 2.343 |
| SLC25A17 | 0.256  | 0.296 | 0.864  | 0.388 | 1.291 | 0.382 | 0.762  | 0.446 | 0.723 | 2.307 |
| SLC25A16 | 0.745  | 0.31  | 2.405  | 0.016 | 2.107 | 0.653 | 1.696  | 0.09  | 1.148 | 3.867 |
| SLC25A15 | 0.599  | 0.306 | 1.959  | 0.05  | 1.82  | 0.556 | 1.474  | 0.14  | 1     | 3.314 |
| SLC25A14 | 0.55   | 0.3   | 1.831  | 0.067 | 1.733 | 0.52  | 1.409  | 0.159 | 0.962 | 3.121 |
| SLC25A13 | 0.205  | 0.296 | 0.693  | 0.488 | 1.228 | 0.364 | 0.627  | 0.531 | 0.687 | 2.196 |
| SLC25A12 | -0.256 | 0.301 | -0.851 | 0.395 | 0.774 | 0.233 | -0.969 | 0.332 | 0.43  | 1.396 |
| SLC25A11 | -0.272 | 0.3   | -0.908 | 0.364 | 0.762 | 0.228 | -1.043 | 0.297 | 0.423 | 1.371 |
| SLC25A10 | 0.197  | 0.296 | 0.666  | 0.506 | 1.218 | 0.361 | 0.604  | 0.546 | 0.682 | 2.176 |
| SLC25A1  | 0.248  | 0.296 | 0.839  | 0.402 | 1.282 | 0.38  | 0.743  | 0.458 | 0.717 | 2.291 |

|            |        |       |        |       |       |       |        |       |       |       |
|------------|--------|-------|--------|-------|-------|-------|--------|-------|-------|-------|
| SLC24A3    | -0.008 | 0.295 | -0.027 | 0.979 | 0.992 | 0.293 | -0.027 | 0.978 | 0.556 | 1.769 |
| SLC24A2    | -0.116 | 0.296 | -0.392 | 0.695 | 0.891 | 0.263 | -0.416 | 0.678 | 0.499 | 1.59  |
| SLC24A1    | 0.176  | 0.296 | 0.594  | 0.552 | 1.192 | 0.353 | 0.545  | 0.586 | 0.667 | 2.131 |
| SLC23A2    | -0.599 | 0.303 | -1.978 | 0.048 | 0.549 | 0.166 | -2.709 | 0.007 | 0.303 | 0.995 |
| SLC22A8    | 0.112  | 0.296 | 0.38   | 0.704 | 1.119 | 0.331 | 0.36   | 0.719 | 0.627 | 1.997 |
| SLC22A7    | -0.275 | 0.298 | -0.921 | 0.357 | 0.76  | 0.227 | -1.059 | 0.289 | 0.424 | 1.363 |
| SLC22A6    | 0.36   | 0.3   | 1.201  | 0.23  | 1.433 | 0.43  | 1.009  | 0.313 | 0.797 | 2.579 |
| SLC22A5    | 0.035  | 0.295 | 0.117  | 0.907 | 1.035 | 0.305 | 0.115  | 0.908 | 0.581 | 1.846 |
| SLC22A4    | -0.229 | 0.301 | -0.763 | 0.445 | 0.795 | 0.239 | -0.858 | 0.391 | 0.441 | 1.433 |
| SLC22A3    | 0.223  | 0.296 | 0.751  | 0.453 | 1.249 | 0.37  | 0.673  | 0.501 | 0.699 | 2.232 |
| SLC22A2    | -0.005 | 0.296 | -0.016 | 0.987 | 0.995 | 0.294 | -0.016 | 0.987 | 0.557 | 1.777 |
| SLC22A18AS | -0.058 | 0.295 | -0.196 | 0.845 | 0.944 | 0.279 | -0.202 | 0.84  | 0.529 | 1.684 |
| SLC22A18   | -0.211 | 0.296 | -0.712 | 0.476 | 0.81  | 0.24  | -0.793 | 0.428 | 0.453 | 1.447 |
| SLC22A17   | 0.162  | 0.296 | 0.546  | 0.585 | 1.176 | 0.348 | 0.504  | 0.614 | 0.658 | 2.101 |
| SLC22A14   | 0.189  | 0.296 | 0.64   | 0.522 | 1.208 | 0.357 | 0.583  | 0.56  | 0.677 | 2.158 |
| SLC22A13   | 0.334  | 0.297 | 1.127  | 0.26  | 1.397 | 0.414 | 0.958  | 0.338 | 0.781 | 2.499 |
| SLC22A11   | -0.137 | 0.296 | -0.461 | 0.645 | 0.872 | 0.258 | -0.494 | 0.621 | 0.488 | 1.559 |
| SLC22A1    | -0.11  | 0.295 | -0.372 | 0.71  | 0.896 | 0.265 | -0.393 | 0.694 | 0.502 | 1.598 |
| SLC20A2    | -0.769 | 0.315 | -2.444 | 0.015 | 0.463 | 0.146 | -3.679 | 0     | 0.25  | 0.859 |
| SLC20A1    | 0.38   | 0.3   | 1.267  | 0.205 | 1.462 | 0.438 | 1.054  | 0.292 | 0.812 | 2.63  |
| SLC1A7     | -0.213 | 0.296 | -0.72  | 0.471 | 0.808 | 0.239 | -0.803 | 0.422 | 0.452 | 1.444 |
| SLC1A6     | 0.027  | 0.297 | 0.089  | 0.929 | 1.027 | 0.305 | 0.088  | 0.93  | 0.574 | 1.837 |
| SLC1A5     | -0.417 | 0.3   | -1.387 | 0.165 | 0.659 | 0.198 | -1.72  | 0.085 | 0.366 | 1.188 |
| SLC1A4     | -0.225 | 0.298 | -0.755 | 0.45  | 0.799 | 0.238 | -0.847 | 0.397 | 0.445 | 1.432 |
| SLC1A3     | 0.214  | 0.297 | 0.722  | 0.471 | 1.239 | 0.367 | 0.65   | 0.516 | 0.693 | 2.215 |
| SLC1A2     | -0.149 | 0.296 | -0.502 | 0.616 | 0.862 | 0.255 | -0.541 | 0.588 | 0.482 | 1.54  |
| SLC1A1     | -0.451 | 0.3   | -1.504 | 0.133 | 0.637 | 0.191 | -1.9   | 0.057 | 0.354 | 1.147 |
| SLC19A3    | 0.099  | 0.295 | 0.335  | 0.738 | 1.104 | 0.326 | 0.319  | 0.75  | 0.619 | 1.968 |
| SLC19A2    | -0.298 | 0.3   | -0.993 | 0.321 | 0.742 | 0.223 | -1.156 | 0.248 | 0.412 | 1.337 |
| SLC19A1    | 0.836  | 0.311 | 2.691  | 0.007 | 2.307 | 0.717 | 1.823  | 0.068 | 1.255 | 4.243 |
| SLC18A3    | 0.454  | 0.3   | 1.517  | 0.129 | 1.575 | 0.472 | 1.219  | 0.223 | 0.876 | 2.834 |
| SLC18A2    | -0.228 | 0.298 | -0.767 | 0.443 | 0.796 | 0.237 | -0.861 | 0.389 | 0.444 | 1.426 |
| SLC18A1    | -0.201 | 0.297 | -0.677 | 0.499 | 0.818 | 0.243 | -0.75  | 0.454 | 0.457 | 1.463 |
| SLC17A9    | 0.067  | 0.296 | 0.227  | 0.821 | 1.069 | 0.316 | 0.219  | 0.827 | 0.599 | 1.91  |
| SLC17A7    | -0.061 | 0.296 | -0.206 | 0.837 | 0.941 | 0.279 | -0.212 | 0.832 | 0.527 | 1.681 |
| SLC17A6    | 0.535  | 0.3   | 1.781  | 0.075 | 1.708 | 0.513 | 1.38   | 0.168 | 0.948 | 3.077 |
| SLC17A5    | 0.377  | 0.3   | 1.258  | 0.208 | 1.458 | 0.437 | 1.048  | 0.295 | 0.81  | 2.622 |
| SLC17A4    | -0.318 | 0.298 | -1.068 | 0.286 | 0.727 | 0.217 | -1.257 | 0.209 | 0.405 | 1.305 |

|          |        |       |        |       |       |       |        |       |       |       |
|----------|--------|-------|--------|-------|-------|-------|--------|-------|-------|-------|
| SLC17A3  | 0.358  | 0.3   | 1.194  | 0.233 | 1.43  | 0.428 | 1.004  | 0.316 | 0.795 | 2.573 |
| SLC17A2  | 0.687  | 0.306 | 2.242  | 0.025 | 1.987 | 0.609 | 1.622  | 0.105 | 1.09  | 3.622 |
| SLC17A1  | -0.033 | 0.296 | -0.113 | 0.91  | 0.967 | 0.286 | -0.115 | 0.909 | 0.542 | 1.727 |
| SLC16A8  | 0.481  | 0.3   | 1.606  | 0.108 | 1.618 | 0.485 | 1.275  | 0.202 | 0.899 | 2.913 |
| SLC16A7  | -0.08  | 0.295 | -0.271 | 0.787 | 0.923 | 0.273 | -0.282 | 0.778 | 0.518 | 1.647 |
| SLC16A6  | -0.278 | 0.304 | -0.913 | 0.361 | 0.758 | 0.23  | -1.052 | 0.293 | 0.418 | 1.375 |
| SLC16A5  | -0.538 | 0.302 | -1.781 | 0.075 | 0.584 | 0.176 | -2.36  | 0.018 | 0.323 | 1.056 |
| SLC16A4  | -0.795 | 0.31  | -2.559 | 0.01  | 0.452 | 0.14  | -3.908 | 0     | 0.246 | 0.83  |
| SLC16A2  | -0.132 | 0.297 | -0.444 | 0.657 | 0.877 | 0.26  | -0.474 | 0.635 | 0.49  | 1.568 |
| SLC16A10 | 1.101  | 0.328 | 3.356  | 0.001 | 3.006 | 0.986 | 2.035  | 0.042 | 1.581 | 5.717 |
| SLC16A1  | -0.089 | 0.296 | -0.3   | 0.765 | 0.915 | 0.271 | -0.313 | 0.754 | 0.513 | 1.634 |
| SLC15A3  | -0.012 | 0.295 | -0.04  | 0.968 | 0.988 | 0.292 | -0.041 | 0.968 | 0.554 | 1.762 |
| SLC15A2  | 0.053  | 0.298 | 0.179  | 0.858 | 1.055 | 0.314 | 0.174  | 0.862 | 0.588 | 1.891 |
| SLC15A1  | 0.639  | 0.31  | 2.062  | 0.039 | 1.894 | 0.586 | 1.524  | 0.127 | 1.032 | 3.475 |
| SLC14A2  | -0.146 | 0.298 | -0.489 | 0.625 | 0.864 | 0.257 | -0.527 | 0.598 | 0.482 | 1.549 |
| SLC14A1  | -0.326 | 0.3   | -1.088 | 0.277 | 0.722 | 0.216 | -1.286 | 0.199 | 0.401 | 1.299 |
| SLC13A4  | 0.034  | 0.297 | 0.115  | 0.908 | 1.035 | 0.307 | 0.113  | 0.91  | 0.579 | 1.851 |
| SLC13A3  | -0.091 | 0.295 | -0.309 | 0.758 | 0.913 | 0.269 | -0.323 | 0.747 | 0.512 | 1.628 |
| SLC13A2  | -0.181 | 0.296 | -0.61  | 0.542 | 0.835 | 0.247 | -0.669 | 0.503 | 0.467 | 1.491 |
| SLC13A1  | 0.455  | 0.302 | 1.506  | 0.132 | 1.577 | 0.477 | 1.21   | 0.226 | 0.872 | 2.851 |
| SLC12A9  | -0.042 | 0.296 | -0.142 | 0.887 | 0.959 | 0.284 | -0.145 | 0.885 | 0.537 | 1.713 |
| SLC12A8  | 0.497  | 0.306 | 1.627  | 0.104 | 1.644 | 0.503 | 1.282  | 0.2   | 0.903 | 2.994 |
| SLC12A7  | -0.304 | 0.299 | -1.018 | 0.309 | 0.738 | 0.22  | -1.19  | 0.234 | 0.411 | 1.325 |
| SLC12A6  | 0.015  | 0.295 | 0.051  | 0.959 | 1.015 | 0.3   | 0.05   | 0.96  | 0.569 | 1.81  |
| SLC12A5  | -0.038 | 0.295 | -0.13  | 0.897 | 0.962 | 0.284 | -0.132 | 0.895 | 0.539 | 1.717 |
| SLC12A4  | 0.024  | 0.295 | 0.082  | 0.935 | 1.025 | 0.302 | 0.081  | 0.935 | 0.575 | 1.827 |
| SLC12A3  | -0.062 | 0.296 | -0.21  | 0.834 | 0.94  | 0.278 | -0.216 | 0.829 | 0.526 | 1.679 |
| SLC12A2  | -0.654 | 0.306 | -2.139 | 0.032 | 0.52  | 0.159 | -3.02  | 0.003 | 0.285 | 0.947 |
| SLC12A1  | 0.229  | 0.297 | 0.772  | 0.44  | 1.257 | 0.373 | 0.69   | 0.49  | 0.703 | 2.248 |
| SLC11A2  | -0.258 | 0.296 | -0.871 | 0.384 | 0.772 | 0.229 | -0.994 | 0.32  | 0.432 | 1.381 |
| SLC11A1  | 0      | 0.296 | 0.001  | 0.999 | 1     | 0.296 | 0.001  | 0.999 | 0.56  | 1.786 |
| SLC10A3  | 0.119  | 0.295 | 0.403  | 0.687 | 1.126 | 0.333 | 0.38   | 0.704 | 0.631 | 2.01  |
| SLC10A2  | 0.193  | 0.296 | 0.653  | 0.514 | 1.213 | 0.359 | 0.594  | 0.553 | 0.679 | 2.168 |
| SLC10A1  | 0.018  | 0.295 | 0.06   | 0.952 | 1.018 | 0.3   | 0.059  | 0.953 | 0.571 | 1.815 |
| SLBP     | 0.561  | 0.302 | 1.855  | 0.064 | 1.752 | 0.53  | 1.42   | 0.156 | 0.969 | 3.169 |
| SLAMF8   | 0.303  | 0.298 | 1.017  | 0.309 | 1.354 | 0.404 | 0.878  | 0.38  | 0.755 | 2.429 |
| SLAMF7   | -0.027 | 0.295 | -0.093 | 0.926 | 0.973 | 0.287 | -0.094 | 0.925 | 0.546 | 1.735 |
| SLAMF1   | -0.246 | 0.297 | -0.83  | 0.406 | 0.782 | 0.232 | -0.941 | 0.347 | 0.437 | 1.398 |

|         |        |       |        |       |       |       |        |       |       |       |
|---------|--------|-------|--------|-------|-------|-------|--------|-------|-------|-------|
| SLA     | 0.038  | 0.295 | 0.129  | 0.898 | 1.039 | 0.307 | 0.126  | 0.9   | 0.582 | 1.853 |
| SKP2    | 0.567  | 0.306 | 1.856  | 0.064 | 1.764 | 0.539 | 1.416  | 0.157 | 0.969 | 3.211 |
| SKP1    | 0.33   | 0.298 | 1.108  | 0.268 | 1.391 | 0.414 | 0.944  | 0.345 | 0.776 | 2.494 |
| SKIV2L  | 0.102  | 0.296 | 0.346  | 0.73  | 1.108 | 0.328 | 0.329  | 0.742 | 0.62  | 1.977 |
| SKIL    | 0.261  | 0.298 | 0.876  | 0.381 | 1.298 | 0.386 | 0.771  | 0.441 | 0.724 | 2.325 |
| SKI     | 0.254  | 0.298 | 0.853  | 0.394 | 1.289 | 0.384 | 0.753  | 0.451 | 0.719 | 2.31  |
| SKAP2   | -0.183 | 0.296 | -0.62  | 0.536 | 0.832 | 0.246 | -0.68  | 0.496 | 0.466 | 1.487 |
| SKAP1   | 0.132  | 0.295 | 0.448  | 0.654 | 1.141 | 0.337 | 0.419  | 0.675 | 0.64  | 2.036 |
| SKA1    | 0.78   | 0.306 | 2.546  | 0.011 | 2.181 | 0.668 | 1.768  | 0.077 | 1.197 | 3.976 |
| SIX6    | 0.111  | 0.295 | 0.375  | 0.707 | 1.117 | 0.33  | 0.355  | 0.722 | 0.626 | 1.993 |
| SIX5    | -0.091 | 0.295 | -0.308 | 0.758 | 0.913 | 0.27  | -0.323 | 0.747 | 0.512 | 1.629 |
| SIX3    | 0.125  | 0.296 | 0.42   | 0.674 | 1.133 | 0.336 | 0.395  | 0.693 | 0.634 | 2.025 |
| SIX2    | 0.045  | 0.295 | 0.153  | 0.879 | 1.046 | 0.309 | 0.149  | 0.881 | 0.587 | 1.866 |
| SIX1    | 0.282  | 0.298 | 0.949  | 0.343 | 1.326 | 0.395 | 0.827  | 0.408 | 0.74  | 2.377 |
| SIVA1   | 0.484  | 0.302 | 1.604  | 0.109 | 1.622 | 0.489 | 1.272  | 0.203 | 0.898 | 2.93  |
| SIT1    | -0.019 | 0.295 | -0.064 | 0.949 | 0.981 | 0.29  | -0.065 | 0.948 | 0.55  | 1.751 |
| SIRT7   | 0.144  | 0.296 | 0.486  | 0.627 | 1.155 | 0.342 | 0.452  | 0.651 | 0.646 | 2.064 |
| SIRT6   | -0.45  | 0.301 | -1.494 | 0.135 | 0.638 | 0.192 | -1.887 | 0.059 | 0.354 | 1.151 |
| SIRT5   | 0.968  | 0.317 | 3.058  | 0.002 | 2.634 | 0.834 | 1.959  | 0.05  | 1.416 | 4.899 |
| SIRT4   | -0.492 | 0.302 | -1.627 | 0.104 | 0.611 | 0.185 | -2.102 | 0.036 | 0.338 | 1.106 |
| SIRT3   | -0.146 | 0.296 | -0.495 | 0.621 | 0.864 | 0.255 | -0.533 | 0.594 | 0.484 | 1.542 |
| SIRT2   | 0.281  | 0.3   | 0.937  | 0.349 | 1.325 | 0.397 | 0.817  | 0.414 | 0.736 | 2.384 |
| SIRT1   | 0.16   | 0.295 | 0.543  | 0.587 | 1.174 | 0.347 | 0.502  | 0.616 | 0.658 | 2.095 |
| SIRPG   | 0.669  | 0.31  | 2.159  | 0.031 | 1.951 | 0.604 | 1.574  | 0.115 | 1.063 | 3.581 |
| SIRPB1  | -0.496 | 0.302 | -1.641 | 0.101 | 0.609 | 0.184 | -2.124 | 0.034 | 0.337 | 1.101 |
| SIRPA   | -0.351 | 0.299 | -1.173 | 0.241 | 0.704 | 0.211 | -1.405 | 0.16  | 0.392 | 1.265 |
| SIPA1L3 | -0.005 | 0.295 | -0.017 | 0.986 | 0.995 | 0.294 | -0.017 | 0.986 | 0.558 | 1.775 |
| SIPA1L1 | 0.223  | 0.296 | 0.752  | 0.452 | 1.249 | 0.37  | 0.674  | 0.5   | 0.699 | 2.232 |
| SIPA1   | 0.367  | 0.298 | 1.229  | 0.219 | 1.443 | 0.431 | 1.029  | 0.304 | 0.804 | 2.59  |
| SINHCAF | -0.259 | 0.297 | -0.873 | 0.383 | 0.772 | 0.229 | -0.996 | 0.319 | 0.432 | 1.38  |
| SIN3B   | -0.397 | 0.3   | -1.324 | 0.185 | 0.672 | 0.202 | -1.626 | 0.104 | 0.374 | 1.21  |
| SIM2    | 0.091  | 0.295 | 0.308  | 0.758 | 1.095 | 0.324 | 0.294  | 0.768 | 0.614 | 1.955 |
| SIM1    | -0.017 | 0.295 | -0.059 | 0.953 | 0.983 | 0.29  | -0.06  | 0.952 | 0.551 | 1.752 |
| SIL1    | 0.366  | 0.299 | 1.224  | 0.221 | 1.441 | 0.43  | 1.026  | 0.305 | 0.803 | 2.588 |
| SIKE1   | 0.403  | 0.3   | 1.345  | 0.179 | 1.497 | 0.449 | 1.107  | 0.268 | 0.832 | 2.693 |
| SIK3    | -0.455 | 0.302 | -1.506 | 0.132 | 0.634 | 0.192 | -1.908 | 0.056 | 0.351 | 1.147 |
| SIK2    | -0.268 | 0.296 | -0.905 | 0.365 | 0.765 | 0.227 | -1.038 | 0.299 | 0.428 | 1.367 |
| SIGMAR1 | -0.131 | 0.296 | -0.442 | 0.658 | 0.877 | 0.26  | -0.472 | 0.637 | 0.491 | 1.568 |

|          |        |       |        |       |       |       |        |       |       |       |
|----------|--------|-------|--------|-------|-------|-------|--------|-------|-------|-------|
| SIGLEC9  | 0.014  | 0.295 | 0.047  | 0.963 | 1.014 | 0.3   | 0.047  | 0.963 | 0.568 | 1.809 |
| SIGLEC8  | -0.5   | 0.302 | -1.654 | 0.098 | 0.607 | 0.183 | -2.146 | 0.032 | 0.335 | 1.097 |
| SIGLEC7  | 0.161  | 0.296 | 0.544  | 0.586 | 1.175 | 0.348 | 0.503  | 0.615 | 0.657 | 2.101 |
| SIGLEC6  | -0.106 | 0.296 | -0.36  | 0.719 | 0.899 | 0.266 | -0.38  | 0.704 | 0.503 | 1.605 |
| SIGLEC5  | -0.467 | 0.302 | -1.545 | 0.122 | 0.627 | 0.19  | -1.969 | 0.049 | 0.346 | 1.134 |
| SIGLEC15 | -0.429 | 0.302 | -1.418 | 0.156 | 0.651 | 0.197 | -1.771 | 0.077 | 0.36  | 1.178 |
| SIGLEC1  | 0.502  | 0.303 | 1.658  | 0.097 | 1.652 | 0.5   | 1.303  | 0.192 | 0.913 | 2.99  |
| SIGIRR   | -0.342 | 0.303 | -1.13  | 0.259 | 0.71  | 0.215 | -1.347 | 0.178 | 0.392 | 1.286 |
| SIDT2    | -0.113 | 0.296 | -0.383 | 0.702 | 0.893 | 0.264 | -0.405 | 0.685 | 0.5   | 1.594 |
| SIDT1    | -0.467 | 0.3   | -1.559 | 0.119 | 0.627 | 0.188 | -1.988 | 0.047 | 0.348 | 1.128 |
| SIAH2    | -0.354 | 0.3   | -1.179 | 0.238 | 0.702 | 0.211 | -1.414 | 0.157 | 0.39  | 1.264 |
| SIAH1    | -0.034 | 0.297 | -0.115 | 0.909 | 0.967 | 0.287 | -0.117 | 0.907 | 0.54  | 1.729 |
| SI       | 0.165  | 0.296 | 0.557  | 0.577 | 1.179 | 0.349 | 0.514  | 0.608 | 0.66  | 2.108 |
| SHTN1    | -0.248 | 0.298 | -0.833 | 0.405 | 0.78  | 0.232 | -0.946 | 0.344 | 0.435 | 1.398 |
| SHROOM2  | 0.34   | 0.298 | 1.143  | 0.253 | 1.405 | 0.418 | 0.969  | 0.333 | 0.784 | 2.519 |
| SHQ1     | -0.158 | 0.299 | -0.53  | 0.596 | 0.854 | 0.255 | -0.574 | 0.566 | 0.475 | 1.533 |
| SHPK     | 0.176  | 0.296 | 0.594  | 0.553 | 1.192 | 0.353 | 0.544  | 0.586 | 0.667 | 2.131 |
| SHOX2    | -0.294 | 0.297 | -0.988 | 0.323 | 0.746 | 0.222 | -1.148 | 0.251 | 0.416 | 1.335 |
| SHOX     | 0.028  | 0.295 | 0.094  | 0.925 | 1.028 | 0.304 | 0.093  | 0.926 | 0.576 | 1.834 |
| SHOC2    | 0.253  | 0.296 | 0.855  | 0.393 | 1.288 | 0.382 | 0.755  | 0.45  | 0.721 | 2.302 |
| SHMT2    | 0.711  | 0.31  | 2.295  | 0.022 | 2.036 | 0.631 | 1.642  | 0.101 | 1.109 | 3.736 |
| SHMT1    | 0.098  | 0.296 | 0.333  | 0.739 | 1.103 | 0.326 | 0.317  | 0.751 | 0.618 | 1.969 |
| SHLD2    | 0.188  | 0.296 | 0.634  | 0.526 | 1.207 | 0.358 | 0.578  | 0.563 | 0.675 | 2.157 |
| SHISAL1  | -0.676 | 0.306 | -2.209 | 0.027 | 0.509 | 0.156 | -3.157 | 0.002 | 0.279 | 0.927 |
| SHISA6   | 0.208  | 0.296 | 0.703  | 0.482 | 1.231 | 0.365 | 0.634  | 0.526 | 0.689 | 2.2   |
| SHH      | -0.605 | 0.305 | -1.985 | 0.047 | 0.546 | 0.166 | -2.728 | 0.006 | 0.301 | 0.992 |
| SHFL     | -0.293 | 0.296 | -0.989 | 0.323 | 0.746 | 0.221 | -1.149 | 0.251 | 0.417 | 1.334 |
| SHCBP1L  | -0.192 | 0.298 | -0.645 | 0.519 | 0.825 | 0.246 | -0.712 | 0.477 | 0.461 | 1.479 |
| SHCBP1   | 0.862  | 0.315 | 2.738  | 0.006 | 2.368 | 0.746 | 1.835  | 0.067 | 1.278 | 4.39  |
| SHC3     | 0.324  | 0.298 | 1.087  | 0.277 | 1.382 | 0.411 | 0.929  | 0.353 | 0.771 | 2.477 |
| SHC2     | 0.004  | 0.296 | 0.015  | 0.988 | 1.004 | 0.297 | 0.015  | 0.988 | 0.563 | 1.792 |
| SHC1     | -0.324 | 0.298 | -1.089 | 0.276 | 0.723 | 0.215 | -1.286 | 0.198 | 0.403 | 1.296 |
| SHBG     | 0.057  | 0.295 | 0.192  | 0.848 | 1.058 | 0.313 | 0.187  | 0.852 | 0.593 | 1.888 |
| SHB      | 0.661  | 0.306 | 2.16   | 0.031 | 1.937 | 0.593 | 1.58   | 0.114 | 1.063 | 3.528 |
| SHARPIN  | -0.133 | 0.297 | -0.447 | 0.655 | 0.876 | 0.26  | -0.478 | 0.633 | 0.489 | 1.567 |
| SHANK2   | 0.228  | 0.298 | 0.767  | 0.443 | 1.257 | 0.374 | 0.686  | 0.493 | 0.701 | 2.252 |
| SHANK1   | -0.067 | 0.295 | -0.228 | 0.82  | 0.935 | 0.276 | -0.236 | 0.814 | 0.524 | 1.668 |
| SH3YL1   | -0.233 | 0.296 | -0.787 | 0.431 | 0.792 | 0.234 | -0.887 | 0.375 | 0.443 | 1.415 |

|          |        |       |        |       |       |       |        |       |       |       |
|----------|--------|-------|--------|-------|-------|-------|--------|-------|-------|-------|
| SH3TC2   | -0.118 | 0.296 | -0.399 | 0.69  | 0.889 | 0.263 | -0.424 | 0.672 | 0.498 | 1.586 |
| SH3TC1   | -0.592 | 0.303 | -1.952 | 0.051 | 0.553 | 0.168 | -2.663 | 0.008 | 0.305 | 1.002 |
| SH3PXD2A | -0.131 | 0.296 | -0.441 | 0.659 | 0.878 | 0.26  | -0.471 | 0.637 | 0.491 | 1.567 |
| SH3GLB2  | -0.389 | 0.303 | -1.284 | 0.199 | 0.678 | 0.205 | -1.57  | 0.116 | 0.374 | 1.227 |
| SH3GLB1  | -0.363 | 0.307 | -1.185 | 0.236 | 0.695 | 0.213 | -1.429 | 0.153 | 0.381 | 1.268 |
| SH3GL3   | -0.388 | 0.298 | -1.3   | 0.193 | 0.678 | 0.202 | -1.589 | 0.112 | 0.378 | 1.217 |
| SH3GL2   | -0.137 | 0.296 | -0.461 | 0.645 | 0.872 | 0.258 | -0.494 | 0.621 | 0.488 | 1.559 |
| SH3GL1   | 0.038  | 0.296 | 0.128  | 0.898 | 1.038 | 0.307 | 0.125  | 0.9   | 0.582 | 1.854 |
| SH3D21   | -0.243 | 0.301 | -0.807 | 0.42  | 0.785 | 0.236 | -0.913 | 0.361 | 0.435 | 1.414 |
| SH3BP5   | 0.009  | 0.297 | 0.03   | 0.976 | 1.009 | 0.3   | 0.03   | 0.976 | 0.564 | 1.806 |
| SH3BP4   | -0.236 | 0.298 | -0.791 | 0.429 | 0.79  | 0.235 | -0.892 | 0.372 | 0.441 | 1.416 |
| SH3BP2   | 0.34   | 0.298 | 1.143  | 0.253 | 1.405 | 0.418 | 0.969  | 0.333 | 0.784 | 2.518 |
| SH3BP1   | -0.505 | 0.306 | -1.652 | 0.099 | 0.604 | 0.184 | -2.149 | 0.032 | 0.332 | 1.099 |
| SH3BGRL3 | -0.816 | 0.315 | -2.588 | 0.01  | 0.442 | 0.139 | -4.001 | 0     | 0.238 | 0.82  |
| SH3BGRL  | 0.085  | 0.296 | 0.286  | 0.775 | 1.088 | 0.322 | 0.274  | 0.784 | 0.61  | 1.943 |
| SH3BGR   | 0.704  | 0.307 | 2.291  | 0.022 | 2.022 | 0.621 | 1.645  | 0.1   | 1.107 | 3.692 |
| SH2D4A   | -0.005 | 0.295 | -0.017 | 0.986 | 0.995 | 0.293 | -0.017 | 0.986 | 0.558 | 1.774 |
| SH2D3C   | -0.025 | 0.296 | -0.086 | 0.932 | 0.975 | 0.289 | -0.087 | 0.931 | 0.545 | 1.743 |
| SH2D3A   | 0.295  | 0.297 | 0.993  | 0.32  | 1.343 | 0.399 | 0.86   | 0.39  | 0.751 | 2.403 |
| SH2D2A   | 0.068  | 0.297 | 0.228  | 0.82  | 1.07  | 0.318 | 0.22   | 0.826 | 0.598 | 1.915 |
| SH2D1A   | -0.231 | 0.297 | -0.777 | 0.437 | 0.794 | 0.236 | -0.874 | 0.382 | 0.444 | 1.421 |
| SH2B3    | -0.347 | 0.298 | -1.165 | 0.244 | 0.707 | 0.211 | -1.393 | 0.164 | 0.394 | 1.267 |
| SH2B2    | 0.026  | 0.296 | 0.088  | 0.93  | 1.026 | 0.303 | 0.087  | 0.931 | 0.575 | 1.832 |
| SH2B1    | -0.414 | 0.299 | -1.386 | 0.166 | 0.661 | 0.197 | -1.718 | 0.086 | 0.368 | 1.187 |
| SGTA     | 0.266  | 0.296 | 0.899  | 0.369 | 1.305 | 0.387 | 0.789  | 0.43  | 0.73  | 2.333 |
| SGSM3    | 0.32   | 0.3   | 1.068  | 0.286 | 1.377 | 0.413 | 0.914  | 0.361 | 0.765 | 2.479 |
| SGSM2    | -0.043 | 0.295 | -0.145 | 0.885 | 0.958 | 0.283 | -0.148 | 0.882 | 0.537 | 1.709 |
| SGSH     | -0.836 | 0.315 | -2.654 | 0.008 | 0.434 | 0.137 | -4.148 | 0     | 0.234 | 0.804 |
| SGPP1    | -0.29  | 0.297 | -0.975 | 0.33  | 0.748 | 0.222 | -1.131 | 0.258 | 0.418 | 1.34  |
| SGPL1    | -0.13  | 0.296 | -0.441 | 0.659 | 0.878 | 0.26  | -0.471 | 0.638 | 0.492 | 1.567 |
| SGMS1    | -0.067 | 0.295 | -0.227 | 0.821 | 0.935 | 0.276 | -0.234 | 0.815 | 0.524 | 1.669 |
| SGK2     | 0.417  | 0.298 | 1.398  | 0.162 | 1.518 | 0.453 | 1.143  | 0.253 | 0.846 | 2.723 |
| SGK1     | -0.517 | 0.303 | -1.707 | 0.088 | 0.597 | 0.181 | -2.235 | 0.025 | 0.33  | 1.08  |
| SGF29    | 0.253  | 0.297 | 0.854  | 0.393 | 1.288 | 0.382 | 0.754  | 0.451 | 0.72  | 2.304 |
| SGCG     | -0.04  | 0.295 | -0.137 | 0.891 | 0.96  | 0.284 | -0.14  | 0.889 | 0.538 | 1.713 |
| SGCE     | -0.077 | 0.295 | -0.259 | 0.796 | 0.926 | 0.274 | -0.269 | 0.788 | 0.519 | 1.653 |
| SGCD     | -0.454 | 0.3   | -1.514 | 0.13  | 0.635 | 0.19  | -1.916 | 0.055 | 0.353 | 1.143 |
| SGCB     | 0.267  | 0.297 | 0.901  | 0.368 | 1.307 | 0.388 | 0.79   | 0.429 | 0.73  | 2.338 |

|        |        |       |        |       |       |       |        |       |       |       |
|--------|--------|-------|--------|-------|-------|-------|--------|-------|-------|-------|
| SGCA   | 0.029  | 0.296 | 0.099  | 0.921 | 1.03  | 0.304 | 0.097  | 0.922 | 0.577 | 1.838 |
| SFXN3  | -0.336 | 0.3   | -1.12  | 0.263 | 0.715 | 0.214 | -1.331 | 0.183 | 0.397 | 1.286 |
| SFXN1  | 0.579  | 0.303 | 1.908  | 0.056 | 1.783 | 0.541 | 1.449  | 0.147 | 0.984 | 3.232 |
| SFTPD  | 0.181  | 0.296 | 0.611  | 0.541 | 1.198 | 0.355 | 0.559  | 0.576 | 0.671 | 2.141 |
| SFTPC  | 0.336  | 0.298 | 1.127  | 0.26  | 1.399 | 0.417 | 0.958  | 0.338 | 0.78  | 2.507 |
| SFTPB  | -0.295 | 0.298 | -0.99  | 0.322 | 0.745 | 0.222 | -1.151 | 0.25  | 0.416 | 1.335 |
| SFT2D2 | 0.872  | 0.321 | 2.719  | 0.007 | 2.393 | 0.768 | 1.814  | 0.07  | 1.276 | 4.487 |
| SFSWAP | 0.509  | 0.302 | 1.684  | 0.092 | 1.663 | 0.503 | 1.319  | 0.187 | 0.92  | 3.008 |
| SFRP5  | 0.43   | 0.3   | 1.432  | 0.152 | 1.537 | 0.461 | 1.164  | 0.244 | 0.853 | 2.767 |
| SFRP4  | -1.007 | 0.316 | -3.186 | 0.001 | 0.365 | 0.115 | -5.497 | 0     | 0.197 | 0.679 |
| SFRP1  | -0.077 | 0.295 | -0.261 | 0.794 | 0.926 | 0.273 | -0.271 | 0.786 | 0.519 | 1.651 |
| SFPQ   | 0.334  | 0.298 | 1.123  | 0.261 | 1.397 | 0.416 | 0.955  | 0.34  | 0.779 | 2.503 |
| SFN    | 0.553  | 0.3   | 1.844  | 0.065 | 1.738 | 0.521 | 1.417  | 0.157 | 0.966 | 3.129 |
| SFMBT1 | 0.314  | 0.297 | 1.06   | 0.289 | 1.369 | 0.406 | 0.91   | 0.363 | 0.766 | 2.449 |
| SF11   | -0.258 | 0.298 | -0.867 | 0.386 | 0.773 | 0.23  | -0.99  | 0.322 | 0.431 | 1.384 |
| SF3B5  | 0.447  | 0.3   | 1.493  | 0.136 | 1.564 | 0.469 | 1.204  | 0.229 | 0.869 | 2.814 |
| SF3B4  | 0.077  | 0.296 | 0.26   | 0.795 | 1.08  | 0.319 | 0.25   | 0.802 | 0.605 | 1.927 |
| SF3B3  | 0.6    | 0.306 | 1.961  | 0.05  | 1.822 | 0.557 | 1.475  | 0.14  | 1     | 3.318 |
| SF3B2  | 0.285  | 0.297 | 0.962  | 0.336 | 1.33  | 0.395 | 0.837  | 0.403 | 0.744 | 2.379 |
| SF3B1  | -0.132 | 0.297 | -0.444 | 0.657 | 0.876 | 0.26  | -0.475 | 0.635 | 0.49  | 1.569 |
| SF3A3  | -0.112 | 0.295 | -0.378 | 0.705 | 0.894 | 0.264 | -0.4   | 0.689 | 0.501 | 1.595 |
| SF3A2  | -0.343 | 0.298 | -1.153 | 0.249 | 0.71  | 0.211 | -1.376 | 0.169 | 0.396 | 1.271 |
| SF3A1  | -0.004 | 0.296 | -0.012 | 0.99  | 0.996 | 0.295 | -0.012 | 0.99  | 0.558 | 1.779 |
| SF1    | 0.137  | 0.296 | 0.463  | 0.643 | 1.147 | 0.34  | 0.433  | 0.665 | 0.642 | 2.05  |
| SEZ6L2 | -0.043 | 0.296 | -0.145 | 0.885 | 0.958 | 0.284 | -0.148 | 0.882 | 0.536 | 1.712 |
| SEZ6L  | -0.17  | 0.296 | -0.573 | 0.566 | 0.844 | 0.25  | -0.625 | 0.532 | 0.472 | 1.508 |
| SETX   | -0.305 | 0.297 | -1.028 | 0.304 | 0.737 | 0.219 | -1.202 | 0.229 | 0.412 | 1.318 |
| SETMAR | -0.593 | 0.311 | -1.911 | 0.056 | 0.552 | 0.172 | -2.608 | 0.009 | 0.301 | 1.015 |
| SETDB1 | -0.131 | 0.295 | -0.444 | 0.657 | 0.877 | 0.259 | -0.475 | 0.635 | 0.492 | 1.564 |
| SETD6  | 0.726  | 0.31  | 2.344  | 0.019 | 2.067 | 0.64  | 1.667  | 0.096 | 1.126 | 3.793 |
| SETD5  | -0.267 | 0.296 | -0.902 | 0.367 | 0.765 | 0.227 | -1.034 | 0.301 | 0.428 | 1.368 |
| SETD4  | 0.204  | 0.296 | 0.69   | 0.49  | 1.227 | 0.363 | 0.624  | 0.533 | 0.687 | 2.192 |
| SETD3  | -0.268 | 0.298 | -0.901 | 0.368 | 0.765 | 0.228 | -1.033 | 0.301 | 0.427 | 1.37  |
| SETD2  | -0.324 | 0.298 | -1.085 | 0.278 | 0.723 | 0.216 | -1.282 | 0.2   | 0.403 | 1.298 |
| SETD1B | 0.011  | 0.295 | 0.037  | 0.97  | 1.011 | 0.298 | 0.037  | 0.97  | 0.567 | 1.803 |
| SETD1A | -0.065 | 0.296 | -0.221 | 0.825 | 0.937 | 0.277 | -0.228 | 0.82  | 0.525 | 1.672 |
| SETBP1 | -0.607 | 0.31  | -1.958 | 0.05  | 0.545 | 0.169 | -2.694 | 0.007 | 0.297 | 1     |
| SET    | 0.38   | 0.3   | 1.268  | 0.205 | 1.462 | 0.438 | 1.055  | 0.291 | 0.813 | 2.63  |



|           |        |       |        |       |       |       |        |       |       |       |
|-----------|--------|-------|--------|-------|-------|-------|--------|-------|-------|-------|
| SESN1     | -0.641 | 0.303 | -2.113 | 0.035 | 0.527 | 0.16  | -2.961 | 0.003 | 0.291 | 0.955 |
| SERTAD3   | 0.002  | 0.3   | 0.007  | 0.995 | 1.002 | 0.3   | 0.007  | 0.995 | 0.557 | 1.803 |
| SERTAD2   | 0.095  | 0.295 | 0.321  | 0.748 | 1.099 | 0.325 | 0.306  | 0.759 | 0.616 | 1.961 |
| SERPINI2  | -0.016 | 0.295 | -0.055 | 0.956 | 0.984 | 0.291 | -0.056 | 0.956 | 0.552 | 1.755 |
| SERPINI1  | -0.415 | 0.3   | -1.383 | 0.167 | 0.66  | 0.198 | -1.715 | 0.086 | 0.367 | 1.189 |
| SERPINH1  | -0.555 | 0.303 | -1.835 | 0.066 | 0.574 | 0.174 | -2.454 | 0.014 | 0.317 | 1.038 |
| SERPING1  | -0.685 | 0.306 | -2.241 | 0.025 | 0.504 | 0.154 | -3.219 | 0.001 | 0.277 | 0.918 |
| SERPINF2  | -0.204 | 0.297 | -0.686 | 0.493 | 0.816 | 0.242 | -0.761 | 0.447 | 0.456 | 1.46  |
| SERPINF1  | -1.309 | 0.337 | -3.889 | 0     | 0.27  | 0.091 | -8.031 | 0     | 0.14  | 0.522 |
| SERPINE2  | -0.696 | 0.304 | -2.291 | 0.022 | 0.498 | 0.151 | -3.312 | 0.001 | 0.275 | 0.904 |
| SERPINE1  | 0.002  | 0.296 | 0.008  | 0.993 | 1.002 | 0.297 | 0.008  | 0.993 | 0.561 | 1.792 |
| SERPIND1  | -0.47  | 0.303 | -1.549 | 0.121 | 0.625 | 0.19  | -1.977 | 0.048 | 0.345 | 1.133 |
| SERPINC1  | -0.176 | 0.296 | -0.596 | 0.551 | 0.838 | 0.248 | -0.652 | 0.514 | 0.47  | 1.496 |
| SERPINB9  | -0.165 | 0.296 | -0.557 | 0.577 | 0.848 | 0.251 | -0.606 | 0.544 | 0.475 | 1.514 |
| SERPINB8  | 0.078  | 0.295 | 0.264  | 0.792 | 1.081 | 0.319 | 0.254  | 0.8   | 0.606 | 1.928 |
| SERPINB7  | -0.562 | 0.306 | -1.839 | 0.066 | 0.57  | 0.174 | -2.467 | 0.014 | 0.313 | 1.038 |
| SERPINB6  | -0.209 | 0.298 | -0.701 | 0.483 | 0.812 | 0.242 | -0.779 | 0.436 | 0.453 | 1.455 |
| SERPINB5  | -0.128 | 0.295 | -0.433 | 0.665 | 0.88  | 0.26  | -0.461 | 0.645 | 0.493 | 1.57  |
| SERPINB4  | -0.124 | 0.296 | -0.42  | 0.674 | 0.883 | 0.261 | -0.448 | 0.654 | 0.495 | 1.577 |
| SERPINB3  | 0.373  | 0.3   | 1.242  | 0.214 | 1.451 | 0.435 | 1.037  | 0.3   | 0.806 | 2.613 |
| SERPINB2  | -0.834 | 0.315 | -2.644 | 0.008 | 0.434 | 0.137 | -4.129 | 0     | 0.234 | 0.806 |
| SERPINB13 | -0.007 | 0.296 | -0.023 | 0.981 | 0.993 | 0.294 | -0.024 | 0.981 | 0.556 | 1.773 |
| SERPINB10 | 0.596  | 0.31  | 1.924  | 0.054 | 1.815 | 0.562 | 1.449  | 0.147 | 0.989 | 3.332 |
| SERPINB1  | -0.376 | 0.3   | -1.255 | 0.21  | 0.687 | 0.206 | -1.523 | 0.128 | 0.382 | 1.235 |
| SERPINA7  | -0.143 | 0.296 | -0.483 | 0.629 | 0.867 | 0.256 | -0.519 | 0.604 | 0.485 | 1.548 |
| SERPINA6  | -0.189 | 0.298 | -0.636 | 0.525 | 0.828 | 0.246 | -0.7   | 0.484 | 0.462 | 1.483 |
| SERPINA5  | 0.073  | 0.296 | 0.247  | 0.805 | 1.076 | 0.319 | 0.238  | 0.812 | 0.602 | 1.922 |
| SERPINA4  | 0.479  | 0.303 | 1.583  | 0.113 | 1.615 | 0.489 | 1.258  | 0.208 | 0.892 | 2.922 |
| SERPINA3  | -0.538 | 0.306 | -1.759 | 0.078 | 0.584 | 0.179 | -2.331 | 0.02  | 0.32  | 1.063 |
| SERPINA2  | 0.016  | 0.295 | 0.053  | 0.958 | 1.016 | 0.3   | 0.052  | 0.958 | 0.57  | 1.811 |
| SERPINA10 | 0.49   | 0.3   | 1.635  | 0.102 | 1.633 | 0.489 | 1.293  | 0.196 | 0.907 | 2.938 |
| SERPINA1  | -0.683 | 0.315 | -2.169 | 0.03  | 0.505 | 0.159 | -3.111 | 0.002 | 0.273 | 0.936 |
| SERP1     | 0.116  | 0.296 | 0.393  | 0.695 | 1.123 | 0.332 | 0.371  | 0.711 | 0.629 | 2.004 |
| SERINC5   | -0.392 | 0.3   | -1.31  | 0.19  | 0.676 | 0.202 | -1.604 | 0.109 | 0.376 | 1.215 |
| SERINC3   | -0.301 | 0.298 | -1.009 | 0.313 | 0.74  | 0.221 | -1.178 | 0.239 | 0.413 | 1.327 |
| SERINC2   | 0.209  | 0.296 | 0.704  | 0.481 | 1.232 | 0.365 | 0.636  | 0.525 | 0.689 | 2.203 |
| SERINC1   | -0.695 | 0.307 | -2.264 | 0.024 | 0.499 | 0.153 | -3.27  | 0.001 | 0.274 | 0.911 |
| SERHL2    | -0.735 | 0.31  | -2.368 | 0.018 | 0.48  | 0.149 | -3.497 | 0     | 0.261 | 0.881 |

|             |        |       |        |       |       |       |        |       |       |       |
|-------------|--------|-------|--------|-------|-------|-------|--------|-------|-------|-------|
| SERGEF      | -0.113 | 0.297 | -0.381 | 0.703 | 0.893 | 0.265 | -0.404 | 0.686 | 0.499 | 1.598 |
| SERBP1      | -0.429 | 0.302 | -1.42  | 0.156 | 0.651 | 0.197 | -1.774 | 0.076 | 0.36  | 1.177 |
| SEPTIN9     | 0.685  | 0.31  | 2.213  | 0.027 | 1.984 | 0.615 | 1.602  | 0.109 | 1.082 | 3.641 |
| SEPTIN8     | 0.221  | 0.297 | 0.744  | 0.457 | 1.248 | 0.371 | 0.668  | 0.504 | 0.697 | 2.236 |
| SEPTIN7P11  | 0.216  | 0.296 | 0.73   | 0.465 | 1.242 | 0.368 | 0.657  | 0.512 | 0.695 | 2.219 |
| SEPTIN7     | -0.13  | 0.295 | -0.441 | 0.659 | 0.878 | 0.259 | -0.471 | 0.637 | 0.492 | 1.566 |
| SEPTIN6     | 0.081  | 0.295 | 0.273  | 0.785 | 1.084 | 0.32  | 0.262  | 0.793 | 0.608 | 1.933 |
| SEPTIN4     | -0.474 | 0.3   | -1.58  | 0.114 | 0.623 | 0.187 | -2.021 | 0.043 | 0.346 | 1.121 |
| SEPTIN2     | -0.417 | 0.298 | -1.398 | 0.162 | 0.659 | 0.196 | -1.735 | 0.083 | 0.368 | 1.182 |
| SEPTIN11    | -0.528 | 0.303 | -1.744 | 0.081 | 0.59  | 0.179 | -2.298 | 0.022 | 0.326 | 1.067 |
| SEPTIN10    | -0.785 | 0.315 | -2.495 | 0.013 | 0.456 | 0.144 | -3.791 | 0     | 0.246 | 0.845 |
| SEPT5-GP1BB | 0.19   | 0.296 | 0.643  | 0.52  | 1.21  | 0.358 | 0.585  | 0.558 | 0.677 | 2.16  |
| SEPHS2      | -0.233 | 0.297 | -0.784 | 0.433 | 0.792 | 0.235 | -0.883 | 0.377 | 0.443 | 1.418 |
| SEPHS1      | 0.044  | 0.295 | 0.148  | 0.882 | 1.045 | 0.308 | 0.145  | 0.885 | 0.586 | 1.863 |
| SENP7       | -0.277 | 0.298 | -0.93  | 0.352 | 0.758 | 0.226 | -1.072 | 0.284 | 0.423 | 1.359 |
| SENP6       | 0.032  | 0.296 | 0.107  | 0.915 | 1.032 | 0.305 | 0.105  | 0.916 | 0.578 | 1.842 |
| SENP5       | 0.315  | 0.3   | 1.048  | 0.294 | 1.37  | 0.411 | 0.9    | 0.368 | 0.761 | 2.467 |
| SENP3       | -0.548 | 0.306 | -1.793 | 0.073 | 0.578 | 0.177 | -2.387 | 0.017 | 0.318 | 1.052 |
| SENP2       | 0.25   | 0.296 | 0.843  | 0.399 | 1.284 | 0.38  | 0.746  | 0.456 | 0.718 | 2.294 |
| SEMG2       | -0.009 | 0.295 | -0.03  | 0.976 | 0.991 | 0.293 | -0.03  | 0.976 | 0.556 | 1.769 |
| SEMG1       | 0.331  | 0.298 | 1.111  | 0.267 | 1.392 | 0.415 | 0.946  | 0.344 | 0.777 | 2.495 |
| SEMA7A      | -0.738 | 0.306 | -2.409 | 0.016 | 0.478 | 0.146 | -3.563 | 0     | 0.262 | 0.872 |
| SEMA6D      | 0.184  | 0.297 | 0.622  | 0.534 | 1.202 | 0.357 | 0.568  | 0.57  | 0.672 | 2.15  |
| SEMA6C      | 0.19   | 0.298 | 0.637  | 0.524 | 1.209 | 0.36  | 0.581  | 0.562 | 0.674 | 2.168 |
| SEMA6B      | 0.007  | 0.295 | 0.023  | 0.981 | 1.007 | 0.297 | 0.023  | 0.981 | 0.564 | 1.796 |
| SEMA6A      | 0.032  | 0.295 | 0.109  | 0.914 | 1.033 | 0.305 | 0.107  | 0.915 | 0.579 | 1.842 |
| SEMA5A      | -0.762 | 0.306 | -2.486 | 0.013 | 0.467 | 0.143 | -3.726 | 0     | 0.256 | 0.851 |
| SEMA4G      | 0.226  | 0.296 | 0.762  | 0.446 | 1.253 | 0.371 | 0.682  | 0.495 | 0.701 | 2.24  |
| SEMA4F      | 0.612  | 0.306 | 2.001  | 0.045 | 1.844 | 0.564 | 1.497  | 0.135 | 1.013 | 3.358 |
| SEMA4D      | -0.321 | 0.298 | -1.078 | 0.281 | 0.725 | 0.216 | -1.271 | 0.204 | 0.405 | 1.301 |
| SEMA4C      | 0.509  | 0.3   | 1.696  | 0.09  | 1.663 | 0.499 | 1.329  | 0.184 | 0.924 | 2.995 |
| SEMA4A      | -0.611 | 0.304 | -2.01  | 0.044 | 0.543 | 0.165 | -2.77  | 0.006 | 0.299 | 0.985 |
| SEMA3G      | 0.08   | 0.295 | 0.272  | 0.786 | 1.084 | 0.32  | 0.261  | 0.794 | 0.607 | 1.934 |
| SEMA3F      | 0.647  | 0.306 | 2.118  | 0.034 | 1.91  | 0.584 | 1.559  | 0.119 | 1.049 | 3.477 |
| SEMA3E      | -0.437 | 0.3   | -1.455 | 0.146 | 0.646 | 0.194 | -1.825 | 0.068 | 0.359 | 1.164 |
| SEMA3D      | 0.343  | 0.298 | 1.15   | 0.25  | 1.409 | 0.42  | 0.974  | 0.33  | 0.786 | 2.526 |
| SEMA3C      | -0.806 | 0.315 | -2.559 | 0.011 | 0.447 | 0.141 | -3.933 | 0     | 0.241 | 0.828 |
| SEMA3B      | -0.109 | 0.296 | -0.369 | 0.712 | 0.897 | 0.265 | -0.39  | 0.697 | 0.502 | 1.602 |

|           |        |       |        |       |       |       |        |       |       |       |
|-----------|--------|-------|--------|-------|-------|-------|--------|-------|-------|-------|
| SEMA3A    | -0.065 | 0.295 | -0.22  | 0.826 | 0.937 | 0.277 | -0.228 | 0.82  | 0.525 | 1.672 |
| SEM1      | 0.712  | 0.31  | 2.296  | 0.022 | 2.037 | 0.631 | 1.643  | 0.1   | 1.11  | 3.739 |
| SELPLG    | -0.469 | 0.303 | -1.55  | 0.121 | 0.626 | 0.189 | -1.977 | 0.048 | 0.346 | 1.132 |
| SELP      | -0.539 | 0.301 | -1.793 | 0.073 | 0.583 | 0.175 | -2.376 | 0.018 | 0.323 | 1.052 |
| SELL      | -0.393 | 0.298 | -1.318 | 0.187 | 0.675 | 0.201 | -1.615 | 0.106 | 0.376 | 1.211 |
| SELENOW   | -0.328 | 0.298 | -1.104 | 0.27  | 0.72  | 0.214 | -1.307 | 0.191 | 0.402 | 1.29  |
| SELENOT   | 0.078  | 0.297 | 0.264  | 0.792 | 1.081 | 0.321 | 0.254  | 0.8   | 0.605 | 1.934 |
| SELENOP   | -0.167 | 0.296 | -0.563 | 0.573 | 0.846 | 0.251 | -0.613 | 0.54  | 0.473 | 1.513 |
| SELENOF   | -0.408 | 0.303 | -1.344 | 0.179 | 0.665 | 0.202 | -1.659 | 0.097 | 0.367 | 1.206 |
| SELENP1   | -0.281 | 0.298 | -0.943 | 0.346 | 0.755 | 0.225 | -1.089 | 0.276 | 0.421 | 1.354 |
| SELE      | -0.554 | 0.303 | -1.828 | 0.067 | 0.575 | 0.174 | -2.442 | 0.015 | 0.317 | 1.041 |
| SEL1L3    | -0.477 | 0.299 | -1.596 | 0.111 | 0.621 | 0.185 | -2.045 | 0.041 | 0.346 | 1.115 |
| SEL1L     | -0.413 | 0.3   | -1.378 | 0.168 | 0.662 | 0.198 | -1.706 | 0.088 | 0.368 | 1.19  |
| SEH1L     | 0.069  | 0.295 | 0.235  | 0.814 | 1.072 | 0.316 | 0.227  | 0.82  | 0.601 | 1.912 |
| SECTM1    | 0.438  | 0.298 | 1.468  | 0.142 | 1.55  | 0.463 | 1.189  | 0.234 | 0.864 | 2.782 |
| SECISBP2L | 0.066  | 0.295 | 0.225  | 0.822 | 1.069 | 0.315 | 0.217  | 0.828 | 0.599 | 1.905 |
| SECISBP2  | -0.551 | 0.306 | -1.801 | 0.072 | 0.576 | 0.176 | -2.402 | 0.016 | 0.317 | 1.05  |
| SEC63     | 0.143  | 0.296 | 0.483  | 0.629 | 1.154 | 0.342 | 0.45   | 0.653 | 0.645 | 2.063 |
| SEC62     | -0.011 | 0.295 | -0.036 | 0.971 | 0.989 | 0.292 | -0.036 | 0.971 | 0.555 | 1.764 |
| SEC61G    | 0.323  | 0.298 | 1.087  | 0.277 | 1.382 | 0.411 | 0.929  | 0.353 | 0.771 | 2.476 |
| SEC61B    | 0.156  | 0.296 | 0.527  | 0.598 | 1.169 | 0.346 | 0.488  | 0.625 | 0.654 | 2.088 |
| SEC61A2   | -0.235 | 0.298 | -0.79  | 0.429 | 0.79  | 0.235 | -0.891 | 0.373 | 0.441 | 1.416 |
| SEC61A1   | -0.169 | 0.296 | -0.571 | 0.568 | 0.845 | 0.25  | -0.622 | 0.534 | 0.473 | 1.509 |
| SEC31B    | -0.217 | 0.296 | -0.731 | 0.465 | 0.805 | 0.239 | -0.817 | 0.414 | 0.45  | 1.439 |
| SEC31A    | -0.009 | 0.296 | -0.032 | 0.975 | 0.991 | 0.293 | -0.032 | 0.975 | 0.554 | 1.77  |
| SEC24D    | 0.065  | 0.295 | 0.218  | 0.827 | 1.067 | 0.315 | 0.212  | 0.832 | 0.598 | 1.903 |
| SEC24C    | -0.426 | 0.3   | -1.421 | 0.155 | 0.653 | 0.196 | -1.771 | 0.077 | 0.363 | 1.176 |
| SEC24B    | -0.312 | 0.3   | -1.043 | 0.297 | 0.732 | 0.219 | -1.224 | 0.221 | 0.407 | 1.316 |
| SEC24A    | -0.18  | 0.296 | -0.609 | 0.542 | 0.835 | 0.247 | -0.667 | 0.505 | 0.468 | 1.491 |
| SEC23IP   | -0.425 | 0.302 | -1.406 | 0.16  | 0.654 | 0.198 | -1.753 | 0.08  | 0.361 | 1.182 |
| SEC23B    | -0.298 | 0.3   | -0.996 | 0.319 | 0.742 | 0.222 | -1.161 | 0.246 | 0.412 | 1.335 |
| SEC23A    | -0.365 | 0.297 | -1.227 | 0.22  | 0.694 | 0.206 | -1.481 | 0.139 | 0.388 | 1.244 |
| SEC22B    | 0.121  | 0.296 | 0.41   | 0.682 | 1.129 | 0.335 | 0.386  | 0.7   | 0.632 | 2.018 |
| SEC22A    | 0.606  | 0.303 | 2.001  | 0.045 | 1.834 | 0.556 | 1.5    | 0.134 | 1.012 | 3.322 |
| SEC16A    | -0.245 | 0.296 | -0.826 | 0.409 | 0.783 | 0.232 | -0.936 | 0.35  | 0.438 | 1.399 |
| SEC14L5   | 0.158  | 0.296 | 0.532  | 0.595 | 1.171 | 0.347 | 0.492  | 0.622 | 0.655 | 2.092 |
| SEC14L4   | -0.206 | 0.296 | -0.696 | 0.486 | 0.814 | 0.241 | -0.773 | 0.44  | 0.455 | 1.455 |
| SEC14L3   | 0.396  | 0.298 | 1.33   | 0.184 | 1.486 | 0.442 | 1.098  | 0.272 | 0.829 | 2.663 |

|           |        |       |        |       |       |       |        |       |       |       |
|-----------|--------|-------|--------|-------|-------|-------|--------|-------|-------|-------|
| SEC14L2   | 0.063  | 0.297 | 0.212  | 0.832 | 1.065 | 0.316 | 0.205  | 0.838 | 0.595 | 1.905 |
| SEC14L1P1 | -0.289 | 0.298 | -0.97  | 0.332 | 0.749 | 0.223 | -1.124 | 0.261 | 0.418 | 1.343 |
| SEC14L1   | -0.216 | 0.296 | -0.731 | 0.465 | 0.805 | 0.238 | -0.816 | 0.415 | 0.451 | 1.439 |
| SEC13     | 0.188  | 0.296 | 0.636  | 0.525 | 1.207 | 0.358 | 0.58   | 0.562 | 0.675 | 2.158 |
| SEC11A    | 0.274  | 0.297 | 0.924  | 0.356 | 1.315 | 0.39  | 0.808  | 0.419 | 0.735 | 2.352 |
| SDS       | 0.521  | 0.302 | 1.722  | 0.085 | 1.683 | 0.509 | 1.342  | 0.179 | 0.931 | 3.044 |
| SDR39U1   | 0.582  | 0.303 | 1.925  | 0.054 | 1.79  | 0.542 | 1.459  | 0.144 | 0.99  | 3.239 |
| SDK2      | 0.185  | 0.296 | 0.627  | 0.531 | 1.204 | 0.356 | 0.572  | 0.567 | 0.674 | 2.148 |
| SDHD      | -0.371 | 0.298 | -1.246 | 0.213 | 0.69  | 0.205 | -1.508 | 0.132 | 0.385 | 1.237 |
| SDHC      | 0.153  | 0.296 | 0.516  | 0.606 | 1.165 | 0.345 | 0.478  | 0.632 | 0.652 | 2.081 |
| SDHB      | -0.223 | 0.306 | -0.728 | 0.467 | 0.8   | 0.245 | -0.815 | 0.415 | 0.439 | 1.458 |
| SDHAF3    | 0.016  | 0.295 | 0.053  | 0.958 | 1.016 | 0.3   | 0.052  | 0.958 | 0.57  | 1.811 |
| SDHAF1    | 0.571  | 0.301 | 1.895  | 0.058 | 1.77  | 0.534 | 1.444  | 0.149 | 0.981 | 3.196 |
| SDHA      | 0.646  | 0.307 | 2.105  | 0.035 | 1.909 | 0.586 | 1.55   | 0.121 | 1.046 | 3.484 |
| SDF4      | -0.743 | 0.316 | -2.353 | 0.019 | 0.476 | 0.15  | -3.491 | 0     | 0.256 | 0.883 |
| SDF2L1    | 0.41   | 0.298 | 1.374  | 0.169 | 1.507 | 0.449 | 1.127  | 0.26  | 0.84  | 2.703 |
| SDF2      | 0.291  | 0.297 | 0.982  | 0.326 | 1.338 | 0.397 | 0.852  | 0.394 | 0.748 | 2.394 |
| SDCBP     | -0.598 | 0.306 | -1.955 | 0.051 | 0.55  | 0.168 | -2.675 | 0.007 | 0.302 | 1.002 |
| SDC4      | -0.17  | 0.296 | -0.574 | 0.566 | 0.844 | 0.249 | -0.626 | 0.531 | 0.473 | 1.506 |
| SDC3      | -0.646 | 0.306 | -2.112 | 0.035 | 0.524 | 0.16  | -2.967 | 0.003 | 0.288 | 0.955 |
| SDC2      | 0.071  | 0.296 | 0.24   | 0.811 | 1.074 | 0.318 | 0.231  | 0.817 | 0.601 | 1.917 |
| SDC1      | -0.439 | 0.3   | -1.46  | 0.144 | 0.645 | 0.194 | -1.833 | 0.067 | 0.358 | 1.162 |
| SDAD1     | -0.036 | 0.297 | -0.123 | 0.902 | 0.964 | 0.286 | -0.125 | 0.901 | 0.539 | 1.724 |
| SCYL3     | -0.267 | 0.298 | -0.899 | 0.369 | 0.765 | 0.228 | -1.03  | 0.303 | 0.427 | 1.371 |
| SCYL2     | 0.018  | 0.296 | 0.06   | 0.952 | 1.018 | 0.301 | 0.059  | 0.953 | 0.57  | 1.817 |
| SCUBE3    | 0.06   | 0.295 | 0.204  | 0.839 | 1.062 | 0.314 | 0.198  | 0.843 | 0.595 | 1.895 |
| SCUBE2    | -0.145 | 0.297 | -0.487 | 0.626 | 0.865 | 0.257 | -0.524 | 0.6   | 0.484 | 1.548 |
| SCTR      | 0.188  | 0.299 | 0.63   | 0.528 | 1.207 | 0.36  | 0.575  | 0.566 | 0.672 | 2.167 |
| SCT       | -0.309 | 0.304 | -1.015 | 0.31  | 0.735 | 0.223 | -1.189 | 0.235 | 0.405 | 1.333 |
| SCRT1     | -0.386 | 0.3   | -1.287 | 0.198 | 0.68  | 0.204 | -1.57  | 0.116 | 0.378 | 1.223 |
| SCRN3     | -0.318 | 0.3   | -1.06  | 0.289 | 0.728 | 0.218 | -1.248 | 0.212 | 0.404 | 1.31  |
| SCRN1     | 0.311  | 0.298 | 1.044  | 0.296 | 1.365 | 0.406 | 0.898  | 0.369 | 0.761 | 2.446 |
| SCRIB     | 1.13   | 0.336 | 3.363  | 0.001 | 3.096 | 1.04  | 2.015  | 0.044 | 1.602 | 5.981 |
| SCRG1     | -0.156 | 0.295 | -0.529 | 0.597 | 0.855 | 0.253 | -0.573 | 0.567 | 0.479 | 1.526 |
| SCPEP1    | -0.177 | 0.296 | -0.598 | 0.55  | 0.838 | 0.248 | -0.654 | 0.513 | 0.47  | 1.495 |
| SCP2      | -0.507 | 0.306 | -1.658 | 0.097 | 0.602 | 0.184 | -2.159 | 0.031 | 0.331 | 1.097 |
| SCO2      | -0.072 | 0.296 | -0.242 | 0.809 | 0.931 | 0.276 | -0.25  | 0.802 | 0.521 | 1.663 |
| SCNN1G    | -0.247 | 0.296 | -0.835 | 0.404 | 0.781 | 0.231 | -0.947 | 0.344 | 0.437 | 1.396 |

|         |        |       |        |       |       |       |        |       |       |       |
|---------|--------|-------|--------|-------|-------|-------|--------|-------|-------|-------|
| SCNN1D  | 0.081  | 0.296 | 0.274  | 0.784 | 1.084 | 0.321 | 0.263  | 0.792 | 0.608 | 1.936 |
| SCNN1B  | -0.121 | 0.296 | -0.408 | 0.683 | 0.886 | 0.262 | -0.434 | 0.664 | 0.496 | 1.584 |
| SCNN1A  | 0.009  | 0.296 | 0.03   | 0.976 | 1.009 | 0.299 | 0.03   | 0.976 | 0.565 | 1.802 |
| SCN9A   | -0.132 | 0.295 | -0.446 | 0.656 | 0.877 | 0.259 | -0.476 | 0.634 | 0.491 | 1.564 |
| SCN8A   | 0.132  | 0.295 | 0.447  | 0.655 | 1.141 | 0.337 | 0.419  | 0.676 | 0.64  | 2.035 |
| SCN7A   | -0.177 | 0.296 | -0.598 | 0.55  | 0.838 | 0.248 | -0.654 | 0.513 | 0.469 | 1.497 |
| SCN5A   | 0.615  | 0.303 | 2.03   | 0.042 | 1.849 | 0.56  | 1.516  | 0.129 | 1.021 | 3.349 |
| SCN4A   | 0.318  | 0.298 | 1.067  | 0.286 | 1.374 | 0.409 | 0.914  | 0.361 | 0.766 | 2.464 |
| SCN3B   | -0.192 | 0.296 | -0.649 | 0.517 | 0.825 | 0.244 | -0.715 | 0.475 | 0.462 | 1.474 |
| SCN3A   | 0.336  | 0.298 | 1.128  | 0.259 | 1.399 | 0.417 | 0.958  | 0.338 | 0.78  | 2.509 |
| SCN2B   | -0.011 | 0.296 | -0.038 | 0.97  | 0.989 | 0.292 | -0.038 | 0.969 | 0.554 | 1.765 |
| SCN2A   | 0.662  | 0.31  | 2.136  | 0.033 | 1.938 | 0.6   | 1.562  | 0.118 | 1.056 | 3.557 |
| SCN1B   | -0.024 | 0.295 | -0.082 | 0.935 | 0.976 | 0.288 | -0.083 | 0.934 | 0.547 | 1.742 |
| SCN1A   | 0      | 0.295 | 0.001  | 0.999 | 1     | 0.295 | 0.001  | 0.999 | 0.561 | 1.783 |
| SCN11A  | 0.407  | 0.3   | 1.36   | 0.174 | 1.503 | 0.45  | 1.117  | 0.264 | 0.836 | 2.703 |
| SCN10A  | 0.532  | 0.302 | 1.759  | 0.079 | 1.702 | 0.515 | 1.364  | 0.173 | 0.941 | 3.08  |
| SCML2   | 0.375  | 0.3   | 1.253  | 0.21  | 1.455 | 0.436 | 1.045  | 0.296 | 0.809 | 2.618 |
| SCML1   | -0.106 | 0.295 | -0.36  | 0.719 | 0.899 | 0.266 | -0.38  | 0.704 | 0.504 | 1.604 |
| SCMH1   | -0.12  | 0.297 | -0.405 | 0.685 | 0.887 | 0.263 | -0.43  | 0.667 | 0.496 | 1.586 |
| SCLY    | -0.334 | 0.298 | -1.122 | 0.262 | 0.716 | 0.213 | -1.332 | 0.183 | 0.399 | 1.284 |
| SCIN    | 0.152  | 0.295 | 0.515  | 0.606 | 1.164 | 0.344 | 0.478  | 0.633 | 0.653 | 2.077 |
| SCGN    | -0.404 | 0.3   | -1.349 | 0.177 | 0.668 | 0.2   | -1.663 | 0.096 | 0.371 | 1.201 |
| SCGB2A2 | 0.307  | 0.298 | 1.032  | 0.302 | 1.36  | 0.405 | 0.889  | 0.374 | 0.759 | 2.437 |
| SCGB2A1 | 0.151  | 0.295 | 0.511  | 0.609 | 1.163 | 0.343 | 0.475  | 0.635 | 0.652 | 2.075 |
| SCGB1D2 | 0.365  | 0.3   | 1.218  | 0.223 | 1.44  | 0.432 | 1.02   | 0.308 | 0.801 | 2.591 |
| SCGB1D1 | 0.533  | 0.302 | 1.765  | 0.078 | 1.705 | 0.515 | 1.368  | 0.171 | 0.943 | 3.083 |
| SCGB1A1 | -0.514 | 0.302 | -1.702 | 0.089 | 0.598 | 0.181 | -2.225 | 0.026 | 0.331 | 1.081 |
| SCG5    | -0.248 | 0.296 | -0.839 | 0.402 | 0.78  | 0.231 | -0.952 | 0.341 | 0.437 | 1.394 |
| SCG3    | -0.332 | 0.3   | -1.107 | 0.268 | 0.718 | 0.215 | -1.313 | 0.189 | 0.399 | 1.291 |
| SCG2    | -0.209 | 0.297 | -0.706 | 0.48  | 0.811 | 0.241 | -0.785 | 0.433 | 0.454 | 1.451 |
| SCFD1   | -0.503 | 0.302 | -1.665 | 0.096 | 0.605 | 0.183 | -2.164 | 0.03  | 0.334 | 1.093 |
| SCEL    | -0.128 | 0.295 | -0.434 | 0.664 | 0.88  | 0.26  | -0.463 | 0.643 | 0.493 | 1.57  |
| SCD5    | 0.291  | 0.298 | 0.978  | 0.328 | 1.338 | 0.398 | 0.848  | 0.396 | 0.747 | 2.397 |
| SCD     | -0.051 | 0.296 | -0.174 | 0.862 | 0.95  | 0.281 | -0.178 | 0.858 | 0.532 | 1.695 |
| SCCPDH  | -0.146 | 0.296 | -0.493 | 0.622 | 0.864 | 0.256 | -0.531 | 0.596 | 0.484 | 1.544 |
| SCARF1  | -0.006 | 0.295 | -0.02  | 0.984 | 0.994 | 0.294 | -0.02  | 0.984 | 0.557 | 1.774 |
| SCARB2  | 0.104  | 0.295 | 0.353  | 0.724 | 1.11  | 0.328 | 0.335  | 0.737 | 0.622 | 1.98  |
| SCARB1  | 0.094  | 0.297 | 0.316  | 0.752 | 1.098 | 0.326 | 0.301  | 0.763 | 0.614 | 1.966 |

|         |        |       |        |       |       |       |        |       |       |       |
|---------|--------|-------|--------|-------|-------|-------|--------|-------|-------|-------|
| SCARA3  | -0.527 | 0.3   | -1.755 | 0.079 | 0.591 | 0.177 | -2.31  | 0.021 | 0.328 | 1.063 |
| SCAPER  | 0.179  | 0.295 | 0.607  | 0.544 | 1.196 | 0.354 | 0.556  | 0.578 | 0.67  | 2.135 |
| SCAP    | 0.194  | 0.298 | 0.65   | 0.515 | 1.214 | 0.362 | 0.591  | 0.554 | 0.677 | 2.176 |
| SCAND2P | -0.137 | 0.296 | -0.464 | 0.643 | 0.872 | 0.258 | -0.497 | 0.619 | 0.488 | 1.558 |
| SCAND1  | 0.242  | 0.296 | 0.817  | 0.414 | 1.274 | 0.378 | 0.726  | 0.468 | 0.713 | 2.277 |
| SCAMP5  | 0.023  | 0.295 | 0.079  | 0.937 | 1.024 | 0.302 | 0.078  | 0.938 | 0.574 | 1.826 |
| SCAMP4  | -0.102 | 0.296 | -0.344 | 0.731 | 0.903 | 0.267 | -0.362 | 0.717 | 0.506 | 1.612 |
| SCAMP3  | 0.195  | 0.297 | 0.658  | 0.51  | 1.216 | 0.361 | 0.598  | 0.55  | 0.68  | 2.175 |
| SCAMP2  | -0.566 | 0.306 | -1.849 | 0.064 | 0.568 | 0.174 | -2.487 | 0.013 | 0.312 | 1.034 |
| SCAMP1  | -0.249 | 0.3   | -0.83  | 0.407 | 0.779 | 0.234 | -0.943 | 0.346 | 0.433 | 1.404 |
| SCAI    | 0.603  | 0.303 | 1.994  | 0.046 | 1.828 | 0.553 | 1.497  | 0.134 | 1.01  | 3.308 |
| SCAF8   | -0.452 | 0.3   | -1.505 | 0.132 | 0.637 | 0.191 | -1.903 | 0.057 | 0.354 | 1.146 |
| SCAF4   | 0.141  | 0.295 | 0.477  | 0.633 | 1.151 | 0.34  | 0.445  | 0.656 | 0.645 | 2.054 |
| SCAF11  | 0.587  | 0.306 | 1.921  | 0.055 | 1.799 | 0.55  | 1.453  | 0.146 | 0.988 | 3.276 |
| SC5D    | -0.64  | 0.306 | -2.095 | 0.036 | 0.527 | 0.161 | -2.935 | 0.003 | 0.29  | 0.96  |
| SBSPON  | -0.526 | 0.306 | -1.722 | 0.085 | 0.591 | 0.181 | -2.267 | 0.023 | 0.324 | 1.075 |
| SBNO2   | -0.224 | 0.298 | -0.751 | 0.453 | 0.8   | 0.238 | -0.841 | 0.4   | 0.446 | 1.433 |
| SBNO1   | 0.444  | 0.298 | 1.49   | 0.136 | 1.559 | 0.465 | 1.203  | 0.229 | 0.869 | 2.797 |
| SBF1    | -0.474 | 0.301 | -1.577 | 0.115 | 0.622 | 0.187 | -2.017 | 0.044 | 0.345 | 1.122 |
| SAYSD1  | 0.127  | 0.295 | 0.429  | 0.668 | 1.135 | 0.335 | 0.403  | 0.687 | 0.636 | 2.025 |
| SAV1    | -0.5   | 0.3   | -1.665 | 0.096 | 0.607 | 0.182 | -2.16  | 0.031 | 0.337 | 1.093 |
| SATB2   | -0.355 | 0.298 | -1.192 | 0.233 | 0.701 | 0.209 | -1.431 | 0.152 | 0.391 | 1.257 |
| SATB1   | 0.116  | 0.295 | 0.392  | 0.695 | 1.123 | 0.332 | 0.37   | 0.711 | 0.629 | 2.003 |
| SAT1    | -0.272 | 0.298 | -0.915 | 0.36  | 0.762 | 0.227 | -1.052 | 0.293 | 0.425 | 1.365 |
| SASH3   | 0.082  | 0.296 | 0.279  | 0.78  | 1.086 | 0.321 | 0.268  | 0.789 | 0.608 | 1.938 |
| SASH1   | 0.25   | 0.298 | 0.839  | 0.401 | 1.284 | 0.383 | 0.743  | 0.458 | 0.716 | 2.303 |
| SART3   | 0.005  | 0.296 | 0.016  | 0.988 | 1.005 | 0.297 | 0.016  | 0.988 | 0.563 | 1.793 |
| SART1   | 0.694  | 0.31  | 2.242  | 0.025 | 2.002 | 0.62  | 1.617  | 0.106 | 1.091 | 3.674 |
| SARS2   | 0.017  | 0.295 | 0.058  | 0.953 | 1.017 | 0.3   | 0.058  | 0.954 | 0.571 | 1.814 |
| SARS1   | -0.31  | 0.3   | -1.036 | 0.3   | 0.733 | 0.22  | -1.215 | 0.224 | 0.408 | 1.319 |
| SARM1   | -0.163 | 0.296 | -0.549 | 0.583 | 0.85  | 0.252 | -0.597 | 0.551 | 0.475 | 1.519 |
| SARDH   | -0.328 | 0.3   | -1.093 | 0.275 | 0.721 | 0.216 | -1.293 | 0.196 | 0.4   | 1.297 |
| SARAF   | -0.533 | 0.306 | -1.743 | 0.081 | 0.587 | 0.179 | -2.302 | 0.021 | 0.322 | 1.069 |
| SAR1B   | 0.436  | 0.299 | 1.459  | 0.145 | 1.547 | 0.463 | 1.182  | 0.237 | 0.861 | 2.78  |
| SAR1A   | 0.275  | 0.3   | 0.916  | 0.359 | 1.317 | 0.395 | 0.801  | 0.423 | 0.731 | 2.372 |
| SAP30L  | 0.199  | 0.298 | 0.669  | 0.503 | 1.22  | 0.363 | 0.607  | 0.544 | 0.681 | 2.186 |
| SAP30BP | 0.542  | 0.302 | 1.795  | 0.073 | 1.72  | 0.52  | 1.385  | 0.166 | 0.951 | 3.111 |
| SAP30   | 0.163  | 0.295 | 0.553  | 0.58  | 1.177 | 0.348 | 0.51   | 0.61  | 0.66  | 2.1   |

|         |        |       |        |       |       |       |        |       |       |       |
|---------|--------|-------|--------|-------|-------|-------|--------|-------|-------|-------|
| SAP18   | 0.365  | 0.298 | 1.223  | 0.221 | 1.44  | 0.43  | 1.025  | 0.306 | 0.803 | 2.584 |
| SAP130  | 0.83   | 0.315 | 2.635  | 0.008 | 2.293 | 0.723 | 1.79   | 0.073 | 1.237 | 4.253 |
| SAMSN1  | -0.221 | 0.296 | -0.745 | 0.456 | 0.802 | 0.238 | -0.833 | 0.405 | 0.449 | 1.433 |
| SAMM50  | 0.16   | 0.297 | 0.538  | 0.591 | 1.173 | 0.348 | 0.497  | 0.619 | 0.656 | 2.098 |
| SAMHD1  | -0.025 | 0.296 | -0.086 | 0.931 | 0.975 | 0.288 | -0.087 | 0.93  | 0.546 | 1.74  |
| SAMD9   | -0.478 | 0.302 | -1.581 | 0.114 | 0.62  | 0.187 | -2.026 | 0.043 | 0.343 | 1.122 |
| SAMD4B  | -0.19  | 0.296 | -0.643 | 0.52  | 0.827 | 0.244 | -0.708 | 0.479 | 0.463 | 1.476 |
| SAMD4A  | -0.578 | 0.303 | -1.909 | 0.056 | 0.561 | 0.17  | -2.585 | 0.01  | 0.31  | 1.015 |
| SAMD14  | 0.867  | 0.315 | 2.753  | 0.006 | 2.38  | 0.75  | 1.841  | 0.066 | 1.284 | 4.413 |
| SALL2   | -0.053 | 0.295 | -0.178 | 0.858 | 0.949 | 0.28  | -0.183 | 0.855 | 0.532 | 1.692 |
| SALL1   | -0.499 | 0.302 | -1.652 | 0.099 | 0.607 | 0.184 | -2.142 | 0.032 | 0.336 | 1.098 |
| SAGE1   | -0.104 | 0.295 | -0.353 | 0.724 | 0.901 | 0.266 | -0.372 | 0.71  | 0.505 | 1.607 |
| SAG     | 0.729  | 0.31  | 2.352  | 0.019 | 2.072 | 0.642 | 1.67   | 0.095 | 1.129 | 3.802 |
| SAFB2   | 0.329  | 0.298 | 1.106  | 0.269 | 1.39  | 0.414 | 0.943  | 0.346 | 0.776 | 2.492 |
| SAFB    | 0.153  | 0.295 | 0.519  | 0.603 | 1.166 | 0.344 | 0.481  | 0.63  | 0.653 | 2.08  |
| SAE1    | 0.346  | 0.298 | 1.164  | 0.245 | 1.414 | 0.421 | 0.984  | 0.325 | 0.789 | 2.534 |
| SACS    | 0.055  | 0.297 | 0.185  | 0.853 | 1.056 | 0.314 | 0.18   | 0.857 | 0.59  | 1.891 |
| SACM1L  | -0.312 | 0.298 | -1.047 | 0.295 | 0.732 | 0.218 | -1.228 | 0.219 | 0.409 | 1.312 |
| SAC3D1  | 0.141  | 0.296 | 0.477  | 0.633 | 1.151 | 0.34  | 0.445  | 0.656 | 0.645 | 2.055 |
| SAA3P   | -0.065 | 0.296 | -0.22  | 0.826 | 0.937 | 0.277 | -0.228 | 0.82  | 0.525 | 1.673 |
| S1PR5   | -0.101 | 0.295 | -0.342 | 0.733 | 0.904 | 0.267 | -0.36  | 0.719 | 0.507 | 1.613 |
| S1PR4   | 0.594  | 0.303 | 1.958  | 0.05  | 1.811 | 0.549 | 1.476  | 0.14  | 0.999 | 3.281 |
| S1PR2   | 0.038  | 0.295 | 0.129  | 0.898 | 1.039 | 0.307 | 0.126  | 0.9   | 0.582 | 1.852 |
| S1PR1   | -0.512 | 0.301 | -1.702 | 0.089 | 0.599 | 0.18  | -2.222 | 0.026 | 0.332 | 1.081 |
| S100PBP | 0.001  | 0.295 | 0.004  | 0.997 | 1.001 | 0.296 | 0.004  | 0.997 | 0.561 | 1.786 |
| S100P   | 0.043  | 0.297 | 0.145  | 0.885 | 1.044 | 0.31  | 0.142  | 0.887 | 0.584 | 1.867 |
| S100G   | 0.354  | 0.3   | 1.182  | 0.237 | 1.425 | 0.427 | 0.995  | 0.32  | 0.792 | 2.563 |
| S100B   | 0.055  | 0.295 | 0.187  | 0.852 | 1.057 | 0.312 | 0.182  | 0.856 | 0.593 | 1.885 |
| S100A9  | 0.294  | 0.298 | 0.989  | 0.323 | 1.342 | 0.4   | 0.857  | 0.392 | 0.749 | 2.406 |
| S100A8  | 0.442  | 0.303 | 1.459  | 0.145 | 1.556 | 0.471 | 1.179  | 0.238 | 0.859 | 2.817 |
| S100A7  | -0.572 | 0.304 | -1.885 | 0.059 | 0.564 | 0.171 | -2.543 | 0.011 | 0.311 | 1.023 |
| S100A6  | 0.206  | 0.296 | 0.695  | 0.487 | 1.229 | 0.364 | 0.628  | 0.53  | 0.688 | 2.195 |
| S100A5  | 0.01   | 0.295 | 0.035  | 0.972 | 1.01  | 0.298 | 0.035  | 0.972 | 0.567 | 1.802 |
| S100A4  | -0.22  | 0.298 | -0.739 | 0.46  | 0.802 | 0.239 | -0.827 | 0.408 | 0.448 | 1.438 |
| S100A3  | -0.373 | 0.3   | -1.246 | 0.213 | 0.688 | 0.206 | -1.511 | 0.131 | 0.383 | 1.239 |
| S100A2  | -0.145 | 0.296 | -0.49  | 0.624 | 0.865 | 0.256 | -0.527 | 0.598 | 0.484 | 1.546 |
| S100A14 | 0.095  | 0.295 | 0.321  | 0.748 | 1.099 | 0.325 | 0.306  | 0.76  | 0.616 | 1.961 |
| S100A13 | -0.203 | 0.296 | -0.686 | 0.493 | 0.816 | 0.242 | -0.76  | 0.447 | 0.457 | 1.459 |

|           |        |       |        |       |       |       |        |       |       |       |
|-----------|--------|-------|--------|-------|-------|-------|--------|-------|-------|-------|
| S100A12   | 0.06   | 0.297 | 0.201  | 0.841 | 1.062 | 0.316 | 0.195  | 0.846 | 0.593 | 1.902 |
| S100A11   | -0.265 | 0.299 | -0.887 | 0.375 | 0.767 | 0.229 | -1.016 | 0.31  | 0.427 | 1.378 |
| S100A10   | 0.365  | 0.298 | 1.225  | 0.221 | 1.441 | 0.43  | 1.026  | 0.305 | 0.803 | 2.585 |
| S100A1    | 0.474  | 0.306 | 1.55   | 0.121 | 1.606 | 0.491 | 1.234  | 0.217 | 0.882 | 2.924 |
| RYR3      | 0.08   | 0.295 | 0.27   | 0.787 | 1.083 | 0.32  | 0.259  | 0.795 | 0.607 | 1.931 |
| RYR2      | -0.191 | 0.297 | -0.645 | 0.519 | 0.826 | 0.245 | -0.71  | 0.477 | 0.461 | 1.478 |
| RYR1      | -1.158 | 0.329 | -3.523 | 0     | 0.314 | 0.103 | -6.645 | 0     | 0.165 | 0.598 |
| RYK       | -0.002 | 0.296 | -0.006 | 0.995 | 0.998 | 0.295 | -0.006 | 0.995 | 0.559 | 1.782 |
| RYBP      | -0.655 | 0.31  | -2.115 | 0.034 | 0.519 | 0.161 | -2.987 | 0.003 | 0.283 | 0.953 |
| RXYLT1    | 0.048  | 0.295 | 0.162  | 0.871 | 1.049 | 0.31  | 0.158  | 0.874 | 0.588 | 1.872 |
| RXRG      | 0.245  | 0.298 | 0.824  | 0.41  | 1.278 | 0.38  | 0.73   | 0.465 | 0.713 | 2.29  |
| RXRB      | 0.15   | 0.298 | 0.502  | 0.616 | 1.161 | 0.346 | 0.466  | 0.641 | 0.647 | 2.083 |
| RXRA      | -0.022 | 0.295 | -0.075 | 0.94  | 0.978 | 0.289 | -0.076 | 0.94  | 0.549 | 1.744 |
| RXFP3     | -0.275 | 0.297 | -0.924 | 0.355 | 0.76  | 0.226 | -1.064 | 0.287 | 0.424 | 1.361 |
| RWDD3     | 0.136  | 0.296 | 0.459  | 0.646 | 1.145 | 0.339 | 0.429  | 0.668 | 0.641 | 2.045 |
| RWDD2B    | 0.137  | 0.296 | 0.463  | 0.643 | 1.147 | 0.339 | 0.433  | 0.665 | 0.642 | 2.047 |
| RWDD2A    | -0.311 | 0.297 | -1.047 | 0.295 | 0.733 | 0.217 | -1.229 | 0.219 | 0.41  | 1.311 |
| RWDD1     | 0.025  | 0.296 | 0.084  | 0.933 | 1.025 | 0.303 | 0.083  | 0.934 | 0.574 | 1.83  |
| RUVBL2    | 0.067  | 0.295 | 0.227  | 0.821 | 1.069 | 0.316 | 0.219  | 0.827 | 0.599 | 1.908 |
| RUVBL1    | 0.174  | 0.295 | 0.59   | 0.555 | 1.19  | 0.352 | 0.541  | 0.588 | 0.667 | 2.124 |
| RUSF1     | -0.993 | 0.317 | -3.13  | 0.002 | 0.371 | 0.118 | -5.355 | 0     | 0.199 | 0.69  |
| RUSC2     | 0.434  | 0.3   | 1.447  | 0.148 | 1.543 | 0.463 | 1.174  | 0.24  | 0.857 | 2.777 |
| RUSC1     | 0.367  | 0.303 | 1.214  | 0.225 | 1.444 | 0.437 | 1.016  | 0.31  | 0.798 | 2.613 |
| RUNX3     | -0.248 | 0.297 | -0.837 | 0.402 | 0.78  | 0.231 | -0.951 | 0.342 | 0.436 | 1.395 |
| RUNX2     | -0.963 | 0.321 | -2.997 | 0.003 | 0.382 | 0.123 | -5.039 | 0     | 0.203 | 0.717 |
| RUNX1T1   | 0.144  | 0.295 | 0.489  | 0.625 | 1.155 | 0.341 | 0.455  | 0.649 | 0.648 | 2.061 |
| RUNX1-IT1 | 0.243  | 0.298 | 0.816  | 0.415 | 1.275 | 0.379 | 0.724  | 0.469 | 0.711 | 2.285 |
| RUNDC3B   | -0.253 | 0.297 | -0.852 | 0.394 | 0.777 | 0.23  | -0.97  | 0.332 | 0.434 | 1.389 |
| RUNDC3A   | 0.097  | 0.295 | 0.327  | 0.744 | 1.101 | 0.325 | 0.312  | 0.755 | 0.617 | 1.965 |
| RUFY3     | -0.334 | 0.3   | -1.115 | 0.265 | 0.716 | 0.215 | -1.324 | 0.185 | 0.398 | 1.288 |
| RUFY2     | -0.208 | 0.297 | -0.701 | 0.483 | 0.812 | 0.241 | -0.779 | 0.436 | 0.454 | 1.453 |
| RUFY1     | -0.141 | 0.295 | -0.478 | 0.632 | 0.868 | 0.256 | -0.514 | 0.607 | 0.487 | 1.549 |
| RUBCNL    | -0.243 | 0.296 | -0.819 | 0.413 | 0.784 | 0.233 | -0.927 | 0.354 | 0.439 | 1.402 |
| RUBCN     | 0.681  | 0.31  | 2.196  | 0.028 | 1.977 | 0.613 | 1.593  | 0.111 | 1.076 | 3.631 |
| RTRAF     | -0.046 | 0.296 | -0.155 | 0.877 | 0.955 | 0.283 | -0.158 | 0.874 | 0.535 | 1.706 |
| RTP4      | 0.135  | 0.296 | 0.457  | 0.648 | 1.145 | 0.339 | 0.427  | 0.669 | 0.64  | 2.047 |
| RTN4      | 0.202  | 0.296 | 0.684  | 0.494 | 1.224 | 0.362 | 0.619  | 0.536 | 0.685 | 2.187 |
| RTN3      | 0.134  | 0.296 | 0.453  | 0.651 | 1.143 | 0.338 | 0.424  | 0.672 | 0.641 | 2.04  |



|         |        |       |        |       |       |       |        |       |       |       |
|---------|--------|-------|--------|-------|-------|-------|--------|-------|-------|-------|
| RTN2    | 0.118  | 0.295 | 0.399  | 0.69  | 1.125 | 0.332 | 0.376  | 0.707 | 0.631 | 2.007 |
| RTN1    | -0.562 | 0.306 | -1.837 | 0.066 | 0.57  | 0.174 | -2.465 | 0.014 | 0.313 | 1.038 |
| RTL8C   | -0.084 | 0.295 | -0.286 | 0.775 | 0.919 | 0.271 | -0.298 | 0.766 | 0.515 | 1.64  |
| RTL8A   | 0.459  | 0.3   | 1.532  | 0.126 | 1.583 | 0.474 | 1.228  | 0.219 | 0.88  | 2.848 |
| RTF2    | 0.189  | 0.296 | 0.639  | 0.523 | 1.208 | 0.358 | 0.582  | 0.561 | 0.676 | 2.161 |
| RTF1    | -0.206 | 0.298 | -0.69  | 0.49  | 0.814 | 0.243 | -0.766 | 0.444 | 0.454 | 1.46  |
| RTEL1   | 0.458  | 0.3   | 1.528  | 0.126 | 1.581 | 0.474 | 1.226  | 0.22  | 0.879 | 2.845 |
| RTCB    | -0.379 | 0.298 | -1.272 | 0.203 | 0.684 | 0.204 | -1.547 | 0.122 | 0.381 | 1.228 |
| RTCA    | 0.015  | 0.296 | 0.05   | 0.96  | 1.015 | 0.3   | 0.049  | 0.961 | 0.569 | 1.811 |
| RSU1    | 0.465  | 0.3   | 1.55   | 0.121 | 1.593 | 0.478 | 1.239  | 0.215 | 0.884 | 2.87  |
| RSRC2   | 0.393  | 0.298 | 1.322  | 0.186 | 1.482 | 0.441 | 1.093  | 0.275 | 0.827 | 2.656 |
| RSRC1   | 0.888  | 0.311 | 2.853  | 0.004 | 2.431 | 0.757 | 1.89   | 0.059 | 1.321 | 4.476 |
| RSPH6A  | 0.183  | 0.297 | 0.615  | 0.539 | 1.2   | 0.357 | 0.562  | 0.574 | 0.67  | 2.149 |
| RSPH14  | 0.49   | 0.302 | 1.622  | 0.105 | 1.633 | 0.493 | 1.282  | 0.2   | 0.903 | 2.952 |
| RSL24D1 | -0.555 | 0.303 | -1.832 | 0.067 | 0.574 | 0.174 | -2.449 | 0.014 | 0.317 | 1.04  |
| RSL1D1  | -0.944 | 0.315 | -2.994 | 0.003 | 0.389 | 0.123 | -4.981 | 0     | 0.21  | 0.722 |
| RSF1    | 0.349  | 0.3   | 1.163  | 0.245 | 1.417 | 0.425 | 0.982  | 0.326 | 0.787 | 2.552 |
| RSBN1   | -0.008 | 0.296 | -0.027 | 0.978 | 0.992 | 0.293 | -0.028 | 0.978 | 0.556 | 1.77  |
| RSAD2   | 0.477  | 0.302 | 1.577  | 0.115 | 1.611 | 0.487 | 1.254  | 0.21  | 0.891 | 2.914 |
| RSAD1   | -0.571 | 0.302 | -1.891 | 0.059 | 0.565 | 0.171 | -2.551 | 0.011 | 0.312 | 1.021 |
| RS1     | 0.29   | 0.298 | 0.973  | 0.331 | 1.337 | 0.399 | 0.844  | 0.399 | 0.745 | 2.398 |
| RRS1    | 0.487  | 0.302 | 1.609  | 0.108 | 1.627 | 0.492 | 1.274  | 0.203 | 0.899 | 2.943 |
| RRP9    | 0.195  | 0.296 | 0.66   | 0.509 | 1.215 | 0.359 | 0.599  | 0.549 | 0.681 | 2.17  |
| RRP8    | 0.621  | 0.306 | 2.031  | 0.042 | 1.861 | 0.569 | 1.513  | 0.13  | 1.022 | 3.388 |
| RRP7A   | 0.225  | 0.296 | 0.761  | 0.447 | 1.253 | 0.371 | 0.681  | 0.496 | 0.701 | 2.238 |
| RRP1B   | 0.529  | 0.306 | 1.728  | 0.084 | 1.697 | 0.519 | 1.342  | 0.18  | 0.931 | 3.091 |
| RRP15   | 0.92   | 0.315 | 2.92   | 0.004 | 2.51  | 0.791 | 1.909  | 0.056 | 1.353 | 4.654 |
| RRP12   | 0.265  | 0.299 | 0.885  | 0.376 | 1.303 | 0.39  | 0.778  | 0.437 | 0.725 | 2.342 |
| RRP1    | 0.639  | 0.304 | 2.101  | 0.036 | 1.895 | 0.576 | 1.553  | 0.12  | 1.044 | 3.439 |
| RRNAD1  | 0.158  | 0.296 | 0.533  | 0.594 | 1.171 | 0.347 | 0.493  | 0.622 | 0.655 | 2.093 |
| RRN3P1  | -0.574 | 0.303 | -1.895 | 0.058 | 0.563 | 0.171 | -2.561 | 0.01  | 0.311 | 1.02  |
| RRN3    | 0.552  | 0.302 | 1.824  | 0.068 | 1.736 | 0.525 | 1.402  | 0.161 | 0.96  | 3.141 |
| RRM2    | 0.9    | 0.321 | 2.807  | 0.005 | 2.46  | 0.789 | 1.851  | 0.064 | 1.312 | 4.612 |
| RRM1    | 0.155  | 0.296 | 0.526  | 0.599 | 1.168 | 0.345 | 0.487  | 0.626 | 0.655 | 2.085 |
| RRH     | 0.324  | 0.298 | 1.088  | 0.277 | 1.383 | 0.412 | 0.929  | 0.353 | 0.771 | 2.478 |
| RREB1   | -0.746 | 0.31  | -2.402 | 0.016 | 0.474 | 0.147 | -3.57  | 0     | 0.258 | 0.872 |
| RRBP1   | 0.141  | 0.299 | 0.473  | 0.636 | 1.152 | 0.344 | 0.441  | 0.659 | 0.641 | 2.069 |
| RRAS2   | 0.365  | 0.298 | 1.226  | 0.22  | 1.441 | 0.429 | 1.027  | 0.304 | 0.804 | 2.583 |

|         |        |       |        |       |       |       |        |       |       |       |
|---------|--------|-------|--------|-------|-------|-------|--------|-------|-------|-------|
| RRAS    | -0.18  | 0.299 | -0.601 | 0.548 | 0.835 | 0.25  | -0.658 | 0.511 | 0.465 | 1.502 |
| RRAGD   | 0.309  | 0.297 | 1.043  | 0.297 | 1.363 | 0.404 | 0.897  | 0.37  | 0.762 | 2.438 |
| RRAGC   | 0.126  | 0.296 | 0.425  | 0.671 | 1.134 | 0.336 | 0.399  | 0.69  | 0.634 | 2.028 |
| RRAGB   | -0.301 | 0.298 | -1.01  | 0.312 | 0.74  | 0.22  | -1.179 | 0.238 | 0.413 | 1.327 |
| RRAGA   | 0.343  | 0.299 | 1.146  | 0.252 | 1.41  | 0.422 | 0.97   | 0.332 | 0.784 | 2.535 |
| RRAD    | -0.211 | 0.298 | -0.708 | 0.479 | 0.81  | 0.241 | -0.788 | 0.431 | 0.452 | 1.452 |
| RPUSD2  | 0.023  | 0.296 | 0.079  | 0.937 | 1.024 | 0.303 | 0.078  | 0.938 | 0.573 | 1.827 |
| RPS9    | 0.069  | 0.295 | 0.232  | 0.816 | 1.071 | 0.316 | 0.224  | 0.822 | 0.6   | 1.91  |
| RPS8    | -0.047 | 0.295 | -0.16  | 0.873 | 0.954 | 0.282 | -0.163 | 0.87  | 0.535 | 1.702 |
| RPS7    | -0.121 | 0.297 | -0.409 | 0.682 | 0.886 | 0.263 | -0.435 | 0.663 | 0.495 | 1.584 |
| RPS6KC1 | 0.215  | 0.297 | 0.725  | 0.468 | 1.24  | 0.368 | 0.653  | 0.514 | 0.693 | 2.217 |
| RPS6KB2 | 0.811  | 0.321 | 2.527  | 0.012 | 2.25  | 0.722 | 1.731  | 0.083 | 1.2   | 4.22  |
| RPS6KB1 | 0.256  | 0.298 | 0.86   | 0.39  | 1.292 | 0.384 | 0.759  | 0.448 | 0.721 | 2.315 |
| RPS6KA6 | -0.065 | 0.296 | -0.221 | 0.825 | 0.937 | 0.277 | -0.228 | 0.819 | 0.524 | 1.674 |
| RPS6KA5 | -0.256 | 0.298 | -0.86  | 0.39  | 0.774 | 0.231 | -0.98  | 0.327 | 0.432 | 1.388 |
| RPS6KA4 | -0.149 | 0.297 | -0.5   | 0.617 | 0.862 | 0.256 | -0.539 | 0.59  | 0.481 | 1.544 |
| RPS6KA3 | -0.274 | 0.297 | -0.924 | 0.355 | 0.76  | 0.225 | -1.063 | 0.288 | 0.425 | 1.36  |
| RPS6KA2 | -0.805 | 0.315 | -2.557 | 0.011 | 0.447 | 0.141 | -3.929 | 0     | 0.241 | 0.829 |
| RPS6KA1 | -0.407 | 0.303 | -1.344 | 0.179 | 0.665 | 0.202 | -1.66  | 0.097 | 0.367 | 1.205 |
| RPS6    | -0.461 | 0.302 | -1.524 | 0.127 | 0.631 | 0.191 | -1.936 | 0.053 | 0.349 | 1.141 |
| RPS5    | 0.116  | 0.295 | 0.392  | 0.695 | 1.123 | 0.332 | 0.37   | 0.711 | 0.629 | 2.004 |
| RPS4Y1  | -0.138 | 0.296 | -0.468 | 0.639 | 0.871 | 0.257 | -0.502 | 0.615 | 0.488 | 1.554 |
| RPS4X   | -0.453 | 0.306 | -1.479 | 0.139 | 0.636 | 0.195 | -1.871 | 0.061 | 0.349 | 1.159 |
| RPS3    | -0.122 | 0.296 | -0.411 | 0.681 | 0.885 | 0.262 | -0.438 | 0.662 | 0.495 | 1.583 |
| RPS2P45 | 0.019  | 0.297 | 0.063  | 0.95  | 1.019 | 0.303 | 0.062  | 0.95  | 0.569 | 1.823 |
| RPS29   | -0.179 | 0.296 | -0.607 | 0.544 | 0.836 | 0.247 | -0.664 | 0.506 | 0.468 | 1.492 |
| RPS28   | 0.286  | 0.296 | 0.966  | 0.334 | 1.331 | 0.394 | 0.84   | 0.401 | 0.745 | 2.379 |
| RPS27L  | -0.146 | 0.299 | -0.489 | 0.625 | 0.864 | 0.258 | -0.527 | 0.598 | 0.481 | 1.551 |
| RPS27A  | 0.024  | 0.298 | 0.08   | 0.936 | 1.024 | 0.306 | 0.079  | 0.937 | 0.571 | 1.838 |
| RPS27   | 0.052  | 0.295 | 0.176  | 0.861 | 1.053 | 0.311 | 0.171  | 0.864 | 0.59  | 1.878 |
| RPS25   | -0.203 | 0.295 | -0.687 | 0.492 | 0.816 | 0.241 | -0.762 | 0.446 | 0.457 | 1.457 |
| RPS24   | -0.842 | 0.316 | -2.661 | 0.008 | 0.431 | 0.136 | -4.175 | 0     | 0.232 | 0.801 |
| RPS23   | 0.412  | 0.298 | 1.383  | 0.167 | 1.51  | 0.45  | 1.133  | 0.257 | 0.842 | 2.708 |
| RPS21   | 0.716  | 0.315 | 2.272  | 0.023 | 2.046 | 0.644 | 1.623  | 0.105 | 1.103 | 3.792 |
| RPS2    | -0.498 | 0.306 | -1.628 | 0.104 | 0.608 | 0.186 | -2.109 | 0.035 | 0.334 | 1.107 |
| RPS19   | -0.026 | 0.296 | -0.088 | 0.93  | 0.974 | 0.288 | -0.089 | 0.929 | 0.545 | 1.74  |
| RPS18   | 0.247  | 0.298 | 0.828  | 0.408 | 1.28  | 0.381 | 0.734  | 0.463 | 0.714 | 2.294 |
| RPS17   | -0.467 | 0.302 | -1.546 | 0.122 | 0.627 | 0.189 | -1.971 | 0.049 | 0.347 | 1.133 |

|         |        |       |        |       |       |       |        |       |       |       |
|---------|--------|-------|--------|-------|-------|-------|--------|-------|-------|-------|
| RPS16   | 0.076  | 0.295 | 0.257  | 0.797 | 1.079 | 0.319 | 0.248  | 0.804 | 0.605 | 1.925 |
| RPS15A  | -0.224 | 0.298 | -0.753 | 0.452 | 0.799 | 0.238 | -0.844 | 0.399 | 0.446 | 1.432 |
| RPS15   | -0.053 | 0.297 | -0.18  | 0.857 | 0.948 | 0.282 | -0.184 | 0.854 | 0.529 | 1.698 |
| RPS14   | 0.029  | 0.295 | 0.098  | 0.922 | 1.029 | 0.304 | 0.097  | 0.923 | 0.577 | 1.836 |
| RPS12   | 0.228  | 0.297 | 0.767  | 0.443 | 1.256 | 0.372 | 0.686  | 0.493 | 0.702 | 2.245 |
| RPS11   | 0.85   | 0.311 | 2.731  | 0.006 | 2.339 | 0.728 | 1.839  | 0.066 | 1.271 | 4.306 |
| RPS10   | 0.181  | 0.295 | 0.612  | 0.54  | 1.198 | 0.354 | 0.56   | 0.575 | 0.672 | 2.138 |
| RPRM    | 0.414  | 0.3   | 1.379  | 0.168 | 1.512 | 0.454 | 1.129  | 0.259 | 0.84  | 2.722 |
| RPRD2   | -0.285 | 0.298 | -0.957 | 0.339 | 0.752 | 0.224 | -1.107 | 0.268 | 0.42  | 1.348 |
| RPRD1A  | -0.024 | 0.297 | -0.082 | 0.935 | 0.976 | 0.289 | -0.083 | 0.934 | 0.546 | 1.745 |
| RPP40   | 0.994  | 0.328 | 3.033  | 0.002 | 2.701 | 0.885 | 1.922  | 0.055 | 1.421 | 5.133 |
| RPP38   | 0.239  | 0.296 | 0.808  | 0.419 | 1.27  | 0.376 | 0.719  | 0.472 | 0.711 | 2.27  |
| RPP30   | -0.196 | 0.298 | -0.657 | 0.511 | 0.822 | 0.245 | -0.726 | 0.468 | 0.459 | 1.474 |
| RPP25   | 0.216  | 0.296 | 0.728  | 0.467 | 1.241 | 0.368 | 0.655  | 0.513 | 0.694 | 2.217 |
| RPP14   | -0.192 | 0.296 | -0.647 | 0.518 | 0.826 | 0.244 | -0.713 | 0.476 | 0.462 | 1.475 |
| RPN2    | 0.265  | 0.296 | 0.895  | 0.371 | 1.304 | 0.386 | 0.786  | 0.432 | 0.73  | 2.329 |
| RPN1    | 0.31   | 0.298 | 1.042  | 0.297 | 1.363 | 0.406 | 0.896  | 0.37  | 0.761 | 2.443 |
| RPLP2   | 0.749  | 0.31  | 2.415  | 0.016 | 2.114 | 0.655 | 1.7    | 0.089 | 1.152 | 3.882 |
| RPLP1   | -0.005 | 0.296 | -0.017 | 0.986 | 0.995 | 0.295 | -0.017 | 0.986 | 0.557 | 1.777 |
| RPLP0   | -0.275 | 0.3   | -0.915 | 0.36  | 0.76  | 0.228 | -1.053 | 0.292 | 0.422 | 1.368 |
| RPL9    | -0.217 | 0.301 | -0.72  | 0.471 | 0.805 | 0.242 | -0.804 | 0.421 | 0.447 | 1.452 |
| RPL8    | 0.347  | 0.297 | 1.172  | 0.241 | 1.416 | 0.42  | 0.99   | 0.322 | 0.792 | 2.531 |
| RPL7    | -0.316 | 0.3   | -1.052 | 0.293 | 0.729 | 0.219 | -1.237 | 0.216 | 0.405 | 1.313 |
| RPL6    | -0.435 | 0.3   | -1.451 | 0.147 | 0.647 | 0.194 | -1.817 | 0.069 | 0.36  | 1.165 |
| RPL41   | 0.318  | 0.298 | 1.069  | 0.285 | 1.375 | 0.409 | 0.916  | 0.36  | 0.767 | 2.463 |
| RPL3L   | 0.115  | 0.296 | 0.39   | 0.697 | 1.122 | 0.333 | 0.368  | 0.713 | 0.628 | 2.006 |
| RPL39L  | 0.723  | 0.307 | 2.36   | 0.018 | 2.061 | 0.632 | 1.68   | 0.093 | 1.13  | 3.759 |
| RPL39   | 0.763  | 0.315 | 2.424  | 0.015 | 2.144 | 0.674 | 1.696  | 0.09  | 1.157 | 3.972 |
| RPL38   | 0.065  | 0.296 | 0.22   | 0.826 | 1.067 | 0.316 | 0.213  | 0.831 | 0.598 | 1.906 |
| RPL37A  | 0.727  | 0.3   | 2.427  | 0.015 | 2.069 | 0.62  | 1.724  | 0.085 | 1.15  | 3.724 |
| RPL37   | 0.248  | 0.3   | 0.828  | 0.408 | 1.282 | 0.384 | 0.733  | 0.463 | 0.712 | 2.306 |
| RPL36AL | -0.541 | 0.301 | -1.795 | 0.073 | 0.582 | 0.175 | -2.381 | 0.017 | 0.323 | 1.051 |
| RPL36   | 0.211  | 0.296 | 0.711  | 0.477 | 1.234 | 0.366 | 0.641  | 0.522 | 0.69  | 2.207 |
| RPL35A  | -0.16  | 0.296 | -0.542 | 0.588 | 0.852 | 0.252 | -0.588 | 0.556 | 0.477 | 1.52  |
| RPL35   | 0.672  | 0.31  | 2.169  | 0.03  | 1.959 | 0.607 | 1.579  | 0.114 | 1.067 | 3.596 |
| RPL34   | 0.05   | 0.296 | 0.168  | 0.866 | 1.051 | 0.311 | 0.164  | 0.87  | 0.589 | 1.877 |
| RPL32   | -0.152 | 0.296 | -0.513 | 0.608 | 0.859 | 0.254 | -0.555 | 0.579 | 0.481 | 1.535 |
| RPL31   | -0.264 | 0.298 | -0.886 | 0.376 | 0.768 | 0.229 | -1.014 | 0.311 | 0.429 | 1.377 |

|           |        |       |        |       |       |       |        |       |       |       |
|-----------|--------|-------|--------|-------|-------|-------|--------|-------|-------|-------|
| RPL30     | -0.285 | 0.3   | -0.95  | 0.342 | 0.752 | 0.225 | -1.1   | 0.271 | 0.418 | 1.353 |
| RPL3      | -0.59  | 0.306 | -1.929 | 0.054 | 0.555 | 0.17  | -2.628 | 0.009 | 0.305 | 1.01  |
| RPL29     | -0.912 | 0.321 | -2.844 | 0.004 | 0.402 | 0.129 | -4.644 | 0     | 0.214 | 0.753 |
| RPL27A    | 1.041  | 0.328 | 3.178  | 0.001 | 2.833 | 0.928 | 1.975  | 0.048 | 1.491 | 5.385 |
| RPL27     | 0.171  | 0.298 | 0.573  | 0.566 | 1.187 | 0.354 | 0.527  | 0.598 | 0.661 | 2.129 |
| RPL26L1   | 0.677  | 0.306 | 2.213  | 0.027 | 1.968 | 0.602 | 1.608  | 0.108 | 1.08  | 3.584 |
| RPL24     | 0.08   | 0.295 | 0.27   | 0.787 | 1.083 | 0.32  | 0.26   | 0.795 | 0.607 | 1.932 |
| RPL23AP53 | -0.28  | 0.3   | -0.936 | 0.349 | 0.755 | 0.226 | -1.08  | 0.28  | 0.42  | 1.359 |
| RPL23AP32 | 0.354  | 0.301 | 1.179  | 0.238 | 1.425 | 0.428 | 0.993  | 0.321 | 0.791 | 2.569 |
| RPL23A    | -0.218 | 0.303 | -0.719 | 0.472 | 0.804 | 0.244 | -0.803 | 0.422 | 0.444 | 1.456 |
| RPL22     | -0.579 | 0.311 | -1.864 | 0.062 | 0.561 | 0.174 | -2.525 | 0.012 | 0.305 | 1.03  |
| RPL19     | -0.369 | 0.3   | -1.231 | 0.218 | 0.691 | 0.207 | -1.489 | 0.136 | 0.384 | 1.244 |
| RPL18     | 0.157  | 0.295 | 0.531  | 0.595 | 1.17  | 0.345 | 0.492  | 0.623 | 0.656 | 2.087 |
| RPL15     | 0.034  | 0.296 | 0.114  | 0.909 | 1.034 | 0.306 | 0.112  | 0.911 | 0.579 | 1.846 |
| RPL14     | 0.158  | 0.295 | 0.534  | 0.593 | 1.171 | 0.346 | 0.494  | 0.621 | 0.656 | 2.089 |
| RPL12     | -0.347 | 0.3   | -1.157 | 0.247 | 0.707 | 0.212 | -1.383 | 0.167 | 0.393 | 1.272 |
| RPL11     | -0.268 | 0.297 | -0.902 | 0.367 | 0.765 | 0.227 | -1.034 | 0.301 | 0.427 | 1.37  |
| RPL10L    | 0.063  | 0.295 | 0.213  | 0.832 | 1.065 | 0.314 | 0.206  | 0.837 | 0.597 | 1.898 |
| RPL10A    | -0.095 | 0.297 | -0.321 | 0.748 | 0.909 | 0.27  | -0.337 | 0.736 | 0.508 | 1.628 |
| RPIA      | 0.044  | 0.295 | 0.15   | 0.881 | 1.045 | 0.309 | 0.147  | 0.883 | 0.586 | 1.866 |
| RPH3AL    | -0.307 | 0.3   | -1.023 | 0.306 | 0.736 | 0.22  | -1.197 | 0.231 | 0.409 | 1.324 |
| RPH3A     | 0.349  | 0.297 | 1.174  | 0.24  | 1.418 | 0.422 | 0.991  | 0.322 | 0.792 | 2.539 |
| RPGRIP1L  | 0.447  | 0.298 | 1.497  | 0.134 | 1.563 | 0.466 | 1.207  | 0.227 | 0.871 | 2.806 |
| RPGRIP1   | -0.092 | 0.296 | -0.31  | 0.757 | 0.912 | 0.27  | -0.325 | 0.745 | 0.511 | 1.63  |
| RPGR      | 0.162  | 0.296 | 0.546  | 0.585 | 1.176 | 0.349 | 0.504  | 0.614 | 0.658 | 2.102 |
| RPF1      | -0.161 | 0.303 | -0.533 | 0.594 | 0.851 | 0.258 | -0.578 | 0.563 | 0.47  | 1.54  |
| RPE65     | -0.312 | 0.298 | -1.046 | 0.296 | 0.732 | 0.218 | -1.227 | 0.22  | 0.408 | 1.313 |
| RPE       | -0.075 | 0.295 | -0.253 | 0.801 | 0.928 | 0.274 | -0.262 | 0.793 | 0.52  | 1.656 |
| RPARP-AS1 | 0.018  | 0.295 | 0.06   | 0.952 | 1.018 | 0.3   | 0.06   | 0.952 | 0.571 | 1.815 |
| RPAP3     | -0.102 | 0.296 | -0.346 | 0.73  | 0.903 | 0.267 | -0.364 | 0.716 | 0.505 | 1.613 |
| RPAP2     | 0.558  | 0.303 | 1.845  | 0.065 | 1.747 | 0.529 | 1.414  | 0.157 | 0.966 | 3.162 |
| RPAP1     | 0.222  | 0.298 | 0.744  | 0.457 | 1.249 | 0.372 | 0.668  | 0.504 | 0.696 | 2.24  |
| RPAIN     | -0.101 | 0.297 | -0.341 | 0.733 | 0.904 | 0.268 | -0.359 | 0.72  | 0.505 | 1.617 |
| RPA4      | -0.182 | 0.296 | -0.614 | 0.539 | 0.834 | 0.247 | -0.674 | 0.5   | 0.466 | 1.49  |
| RPA3      | 0.394  | 0.298 | 1.322  | 0.186 | 1.482 | 0.441 | 1.093  | 0.274 | 0.827 | 2.657 |
| RPA2      | 0.159  | 0.296 | 0.537  | 0.591 | 1.172 | 0.346 | 0.497  | 0.619 | 0.657 | 2.092 |
| RPA1      | -0.07  | 0.296 | -0.237 | 0.813 | 0.932 | 0.276 | -0.246 | 0.806 | 0.521 | 1.666 |
| RP2       | 0.27   | 0.297 | 0.911  | 0.362 | 1.31  | 0.389 | 0.798  | 0.425 | 0.732 | 2.345 |

|         |        |       |        |       |       |       |        |       |       |       |
|---------|--------|-------|--------|-------|-------|-------|--------|-------|-------|-------|
| ROS1    | -0.414 | 0.3   | -1.38  | 0.168 | 0.661 | 0.198 | -1.709 | 0.087 | 0.368 | 1.19  |
| RORC    | -0.939 | 0.315 | -2.977 | 0.003 | 0.391 | 0.123 | -4.936 | 0     | 0.211 | 0.726 |
| RORB    | 0.021  | 0.295 | 0.071  | 0.943 | 1.021 | 0.301 | 0.07   | 0.944 | 0.573 | 1.821 |
| RORA    | -0.214 | 0.299 | -0.716 | 0.474 | 0.807 | 0.242 | -0.799 | 0.424 | 0.449 | 1.451 |
| ROR2    | -0.481 | 0.302 | -1.59  | 0.112 | 0.618 | 0.187 | -2.041 | 0.041 | 0.342 | 1.118 |
| ROR1    | 0.02   | 0.295 | 0.069  | 0.945 | 1.021 | 0.301 | 0.068  | 0.945 | 0.572 | 1.821 |
| ROM1    | 0.27   | 0.297 | 0.907  | 0.364 | 1.309 | 0.389 | 0.795  | 0.427 | 0.731 | 2.344 |
| ROGDI   | 0.023  | 0.296 | 0.079  | 0.937 | 1.024 | 0.303 | 0.078  | 0.938 | 0.573 | 1.828 |
| ROCK2   | -0.032 | 0.295 | -0.107 | 0.915 | 0.969 | 0.286 | -0.109 | 0.914 | 0.543 | 1.729 |
| ROCK1   | 0.085  | 0.295 | 0.286  | 0.775 | 1.088 | 0.321 | 0.275  | 0.784 | 0.61  | 1.941 |
| ROBO4   | -0.369 | 0.298 | -1.239 | 0.215 | 0.691 | 0.206 | -1.499 | 0.134 | 0.385 | 1.24  |
| ROBO3   | -0.496 | 0.302 | -1.64  | 0.101 | 0.609 | 0.184 | -2.123 | 0.034 | 0.337 | 1.102 |
| ROBO1   | -0.387 | 0.298 | -1.299 | 0.194 | 0.679 | 0.202 | -1.587 | 0.113 | 0.378 | 1.218 |
| RO60    | 0.745  | 0.31  | 2.404  | 0.016 | 2.107 | 0.653 | 1.695  | 0.09  | 1.147 | 3.868 |
| RNPS1   | -0.074 | 0.295 | -0.251 | 0.802 | 0.929 | 0.274 | -0.261 | 0.794 | 0.52  | 1.657 |
| RNPEPL1 | 0.265  | 0.298 | 0.891  | 0.373 | 1.304 | 0.388 | 0.783  | 0.434 | 0.728 | 2.336 |
| RNPEP   | -0.024 | 0.295 | -0.081 | 0.935 | 0.976 | 0.288 | -0.082 | 0.935 | 0.547 | 1.741 |
| RNMT    | -0.058 | 0.295 | -0.198 | 0.843 | 0.943 | 0.279 | -0.204 | 0.838 | 0.529 | 1.683 |
| RNLS    | -0.061 | 0.296 | -0.205 | 0.838 | 0.941 | 0.279 | -0.211 | 0.833 | 0.526 | 1.683 |
| RNH1    | -0.303 | 0.3   | -1.009 | 0.313 | 0.739 | 0.222 | -1.179 | 0.239 | 0.41  | 1.33  |
| RNGTT   | -0.171 | 0.297 | -0.574 | 0.566 | 0.843 | 0.251 | -0.626 | 0.531 | 0.471 | 1.509 |
| RNFT2   | 0.204  | 0.296 | 0.687  | 0.492 | 1.226 | 0.363 | 0.622  | 0.534 | 0.686 | 2.191 |
| RNFT1   | -0.496 | 0.303 | -1.638 | 0.101 | 0.609 | 0.184 | -2.122 | 0.034 | 0.336 | 1.102 |
| RNF8    | 0.395  | 0.3   | 1.32   | 0.187 | 1.485 | 0.445 | 1.09   | 0.276 | 0.826 | 2.671 |
| RNF7    | -0.018 | 0.295 | -0.062 | 0.95  | 0.982 | 0.29  | -0.063 | 0.95  | 0.551 | 1.751 |
| RNF6    | 0.197  | 0.298 | 0.661  | 0.509 | 1.218 | 0.363 | 0.6    | 0.549 | 0.679 | 2.184 |
| RNF5    | -0.545 | 0.302 | -1.808 | 0.071 | 0.58  | 0.175 | -2.404 | 0.016 | 0.321 | 1.047 |
| RNF44   | -0.002 | 0.295 | -0.008 | 0.994 | 0.998 | 0.295 | -0.008 | 0.994 | 0.559 | 1.78  |
| RNF43   | -0.068 | 0.296 | -0.229 | 0.819 | 0.935 | 0.276 | -0.236 | 0.813 | 0.524 | 1.668 |
| RNF41   | -0.236 | 0.298 | -0.793 | 0.428 | 0.79  | 0.235 | -0.895 | 0.371 | 0.441 | 1.415 |
| RNF40   | -0.601 | 0.303 | -1.982 | 0.047 | 0.548 | 0.166 | -2.717 | 0.007 | 0.303 | 0.993 |
| RNF4    | -0.501 | 0.302 | -1.659 | 0.097 | 0.606 | 0.183 | -2.154 | 0.031 | 0.335 | 1.095 |
| RNF39   | -0.399 | 0.298 | -1.337 | 0.181 | 0.671 | 0.2   | -1.643 | 0.1   | 0.374 | 1.204 |
| RNF38   | -0.302 | 0.298 | -1.012 | 0.312 | 0.74  | 0.22  | -1.181 | 0.238 | 0.412 | 1.327 |
| RNF34   | 0.078  | 0.296 | 0.265  | 0.791 | 1.082 | 0.32  | 0.254  | 0.799 | 0.605 | 1.933 |
| RNF32   | 0.326  | 0.298 | 1.095  | 0.274 | 1.385 | 0.412 | 0.934  | 0.35  | 0.773 | 2.482 |
| RNF25   | -0.175 | 0.299 | -0.585 | 0.559 | 0.84  | 0.251 | -0.639 | 0.523 | 0.467 | 1.508 |
| RNF24   | -0.112 | 0.296 | -0.377 | 0.707 | 0.894 | 0.265 | -0.398 | 0.69  | 0.5   | 1.599 |

|            |        |       |        |       |       |       |        |       |       |       |
|------------|--------|-------|--------|-------|-------|-------|--------|-------|-------|-------|
| RNF220     | -0.337 | 0.298 | -1.133 | 0.257 | 0.714 | 0.212 | -1.347 | 0.178 | 0.398 | 1.279 |
| RNF216     | -0.588 | 0.303 | -1.94  | 0.052 | 0.555 | 0.168 | -2.641 | 0.008 | 0.307 | 1.006 |
| RNF208     | -0.203 | 0.296 | -0.686 | 0.492 | 0.816 | 0.242 | -0.761 | 0.446 | 0.456 | 1.459 |
| RNF2       | 0.444  | 0.301 | 1.476  | 0.14  | 1.559 | 0.469 | 1.192  | 0.233 | 0.865 | 2.81  |
| RNF19B     | -0.631 | 0.304 | -2.078 | 0.038 | 0.532 | 0.162 | -2.897 | 0.004 | 0.293 | 0.965 |
| RNF19A     | -0.155 | 0.298 | -0.52  | 0.603 | 0.857 | 0.255 | -0.563 | 0.574 | 0.478 | 1.535 |
| RNF187     | 0.072  | 0.295 | 0.245  | 0.806 | 1.075 | 0.317 | 0.236  | 0.813 | 0.603 | 1.917 |
| RNF186     | 0.203  | 0.296 | 0.687  | 0.492 | 1.226 | 0.363 | 0.622  | 0.534 | 0.686 | 2.19  |
| RNF185-AS1 | -0.342 | 0.299 | -1.144 | 0.253 | 0.71  | 0.213 | -1.364 | 0.173 | 0.395 | 1.277 |
| RNF170     | -0.333 | 0.3   | -1.109 | 0.268 | 0.717 | 0.215 | -1.316 | 0.188 | 0.398 | 1.291 |
| RNF17      | -0.099 | 0.296 | -0.336 | 0.737 | 0.905 | 0.268 | -0.353 | 0.724 | 0.507 | 1.616 |
| RNF167     | 0.239  | 0.296 | 0.806  | 0.42  | 1.27  | 0.376 | 0.717  | 0.473 | 0.711 | 2.269 |
| RNF146     | 0.054  | 0.296 | 0.183  | 0.854 | 1.056 | 0.313 | 0.179  | 0.858 | 0.591 | 1.887 |
| RNF144A    | -0.18  | 0.296 | -0.61  | 0.542 | 0.835 | 0.247 | -0.668 | 0.504 | 0.468 | 1.49  |
| RNF141     | 0.318  | 0.297 | 1.071  | 0.284 | 1.374 | 0.408 | 0.918  | 0.359 | 0.768 | 2.459 |
| RNF14      | -0.425 | 0.307 | -1.386 | 0.166 | 0.654 | 0.2   | -1.727 | 0.084 | 0.359 | 1.192 |
| RNF139     | 0.64   | 0.31  | 2.066  | 0.039 | 1.897 | 0.588 | 1.525  | 0.127 | 1.033 | 3.482 |
| RNF138     | -0.077 | 0.296 | -0.259 | 0.795 | 0.926 | 0.274 | -0.27  | 0.787 | 0.518 | 1.655 |
| RNF130     | -0.342 | 0.298 | -1.149 | 0.251 | 0.71  | 0.211 | -1.37  | 0.171 | 0.396 | 1.273 |
| RNF13      | -0.101 | 0.296 | -0.341 | 0.733 | 0.904 | 0.268 | -0.359 | 0.719 | 0.505 | 1.616 |
| RNF128     | 0.336  | 0.298 | 1.129  | 0.259 | 1.4   | 0.417 | 0.959  | 0.337 | 0.781 | 2.508 |
| RNF126P1   | 0.111  | 0.295 | 0.374  | 0.708 | 1.117 | 0.33  | 0.354  | 0.723 | 0.626 | 1.993 |
| RNF126     | 0.69   | 0.307 | 2.246  | 0.025 | 1.993 | 0.612 | 1.622  | 0.105 | 1.092 | 3.64  |
| RNF125     | 0.062  | 0.295 | 0.21   | 0.834 | 1.064 | 0.314 | 0.203  | 0.839 | 0.596 | 1.898 |
| RNF123     | -0.503 | 0.302 | -1.663 | 0.096 | 0.605 | 0.183 | -2.161 | 0.031 | 0.334 | 1.094 |
| RNF122     | -0.01  | 0.296 | -0.034 | 0.973 | 0.99  | 0.293 | -0.034 | 0.973 | 0.554 | 1.769 |
| RNF121     | 0.155  | 0.296 | 0.524  | 0.6   | 1.168 | 0.346 | 0.486  | 0.627 | 0.654 | 2.088 |
| RNF115     | 0.547  | 0.303 | 1.806  | 0.071 | 1.728 | 0.523 | 1.392  | 0.164 | 0.955 | 3.127 |
| RNF114     | 0.41   | 0.303 | 1.356  | 0.175 | 1.507 | 0.456 | 1.112  | 0.266 | 0.833 | 2.728 |
| RNF113A    | 0.155  | 0.299 | 0.517  | 0.605 | 1.167 | 0.349 | 0.479  | 0.632 | 0.65  | 2.096 |
| RNF111     | -0.69  | 0.31  | -2.226 | 0.026 | 0.502 | 0.155 | -3.206 | 0.001 | 0.273 | 0.921 |
| RNF11      | -0.341 | 0.298 | -1.146 | 0.252 | 0.711 | 0.212 | -1.366 | 0.172 | 0.397 | 1.274 |
| RNF103     | -0.481 | 0.302 | -1.59  | 0.112 | 0.618 | 0.187 | -2.041 | 0.041 | 0.342 | 1.118 |
| RNF10      | -0.135 | 0.3   | -0.449 | 0.653 | 0.874 | 0.262 | -0.481 | 0.63  | 0.486 | 1.573 |
| RND3       | 0.078  | 0.296 | 0.263  | 0.793 | 1.081 | 0.32  | 0.253  | 0.8   | 0.605 | 1.933 |
| RND2       | 1.037  | 0.319 | 3.253  | 0.001 | 2.822 | 0.9   | 2.025  | 0.043 | 1.51  | 5.272 |
| RND1       | 0.192  | 0.296 | 0.65   | 0.516 | 1.212 | 0.359 | 0.591  | 0.555 | 0.678 | 2.166 |
| RNASET2    | -0.402 | 0.3   | -1.342 | 0.18  | 0.669 | 0.2   | -1.651 | 0.099 | 0.372 | 1.204 |

|          |        |       |        |       |       |       |        |       |       |       |
|----------|--------|-------|--------|-------|-------|-------|--------|-------|-------|-------|
| RNASEL   | -0.826 | 0.311 | -2.652 | 0.008 | 0.438 | 0.136 | -4.124 | 0     | 0.238 | 0.806 |
| RNASEH2B | -0.388 | 0.3   | -1.295 | 0.195 | 0.679 | 0.203 | -1.581 | 0.114 | 0.377 | 1.221 |
| RNASEH2A | 0.506  | 0.3   | 1.686  | 0.092 | 1.658 | 0.497 | 1.323  | 0.186 | 0.921 | 2.984 |
| RNASEH1  | 0.252  | 0.296 | 0.852  | 0.394 | 1.287 | 0.381 | 0.753  | 0.451 | 0.72  | 2.3   |
| RNASE6   | -0.543 | 0.306 | -1.777 | 0.076 | 0.581 | 0.178 | -2.36  | 0.018 | 0.319 | 1.058 |
| RNASE4   | -0.615 | 0.31  | -1.984 | 0.047 | 0.541 | 0.168 | -2.741 | 0.006 | 0.295 | 0.993 |
| RNASE3   | -0.789 | 0.311 | -2.539 | 0.011 | 0.455 | 0.141 | -3.865 | 0     | 0.247 | 0.835 |
| RNASE2   | 0.095  | 0.296 | 0.322  | 0.748 | 1.1   | 0.326 | 0.307  | 0.759 | 0.615 | 1.966 |
| RNASE1   | 0.338  | 0.297 | 1.141  | 0.254 | 1.403 | 0.416 | 0.968  | 0.333 | 0.784 | 2.509 |
| RMND5B   | -0.119 | 0.296 | -0.403 | 0.687 | 0.887 | 0.263 | -0.428 | 0.668 | 0.497 | 1.586 |
| RMND5A   | -0.278 | 0.297 | -0.934 | 0.35  | 0.758 | 0.225 | -1.076 | 0.282 | 0.423 | 1.357 |
| RMND1    | -0.108 | 0.296 | -0.363 | 0.717 | 0.898 | 0.266 | -0.383 | 0.701 | 0.503 | 1.605 |
| RMI1     | 0.195  | 0.296 | 0.658  | 0.51  | 1.215 | 0.36  | 0.598  | 0.55  | 0.68  | 2.173 |
| RMDN3    | 0.063  | 0.295 | 0.214  | 0.83  | 1.065 | 0.315 | 0.207  | 0.836 | 0.597 | 1.901 |
| RMDN1    | 0.073  | 0.296 | 0.245  | 0.806 | 1.075 | 0.318 | 0.237  | 0.813 | 0.602 | 1.919 |
| RMC1     | 0.597  | 0.302 | 1.973  | 0.049 | 1.816 | 0.549 | 1.486  | 0.137 | 1.004 | 3.285 |
| RLN2     | 0.233  | 0.296 | 0.785  | 0.433 | 1.262 | 0.374 | 0.7    | 0.484 | 0.706 | 2.256 |
| RLN1     | 0.556  | 0.303 | 1.837  | 0.066 | 1.744 | 0.528 | 1.409  | 0.159 | 0.963 | 3.158 |
| RLF      | 0.008  | 0.295 | 0.027  | 0.978 | 1.008 | 0.298 | 0.027  | 0.978 | 0.565 | 1.798 |
| RLBP1    | 0.142  | 0.297 | 0.477  | 0.633 | 1.152 | 0.342 | 0.445  | 0.656 | 0.644 | 2.06  |
| RITA1    | 0.279  | 0.298 | 0.937  | 0.349 | 1.322 | 0.394 | 0.818  | 0.414 | 0.737 | 2.37  |
| RIT2     | 0.294  | 0.296 | 0.993  | 0.321 | 1.342 | 0.397 | 0.86   | 0.39  | 0.751 | 2.396 |
| RIT1     | 0.637  | 0.304 | 2.099  | 0.036 | 1.892 | 0.574 | 1.552  | 0.121 | 1.043 | 3.43  |
| RIPPLY3  | 0.196  | 0.297 | 0.659  | 0.51  | 1.216 | 0.361 | 0.599  | 0.549 | 0.68  | 2.175 |
| RIPOR2   | 0.057  | 0.295 | 0.194  | 0.846 | 1.059 | 0.313 | 0.189  | 0.85  | 0.594 | 1.889 |
| RIPOR1   | -0.317 | 0.297 | -1.067 | 0.286 | 0.728 | 0.217 | -1.255 | 0.209 | 0.407 | 1.304 |
| RIPK4    | 0.44   | 0.298 | 1.477  | 0.14  | 1.553 | 0.463 | 1.195  | 0.232 | 0.866 | 2.786 |
| RIPK2    | 0.806  | 0.31  | 2.6    | 0.009 | 2.24  | 0.695 | 1.785  | 0.074 | 1.22  | 4.113 |
| RIPK1    | -0.497 | 0.301 | -1.654 | 0.098 | 0.608 | 0.183 | -2.142 | 0.032 | 0.337 | 1.096 |
| RIOX2    | 0.065  | 0.298 | 0.217  | 0.828 | 1.067 | 0.318 | 0.21   | 0.834 | 0.595 | 1.914 |
| RIOX1    | 0.058  | 0.295 | 0.196  | 0.845 | 1.06  | 0.313 | 0.191  | 0.849 | 0.594 | 1.89  |
| RIOK3    | -0.325 | 0.298 | -1.091 | 0.275 | 0.722 | 0.215 | -1.29  | 0.197 | 0.403 | 1.295 |
| RIOK2    | -0.246 | 0.301 | -0.817 | 0.414 | 0.782 | 0.235 | -0.926 | 0.354 | 0.434 | 1.41  |
| RINT1    | -0.192 | 0.296 | -0.65  | 0.516 | 0.825 | 0.244 | -0.716 | 0.474 | 0.462 | 1.474 |
| RING1    | -0.263 | 0.297 | -0.885 | 0.376 | 0.769 | 0.229 | -1.013 | 0.311 | 0.429 | 1.377 |
| RIN3     | 0.418  | 0.3   | 1.393  | 0.163 | 1.518 | 0.455 | 1.139  | 0.255 | 0.844 | 2.732 |
| RIN2     | -0.536 | 0.302 | -1.772 | 0.076 | 0.585 | 0.177 | -2.345 | 0.019 | 0.324 | 1.058 |
| RIN1     | 0.66   | 0.306 | 2.157  | 0.031 | 1.935 | 0.592 | 1.579  | 0.114 | 1.062 | 3.524 |

|           |        |       |        |       |       |       |        |       |       |       |
|-----------|--------|-------|--------|-------|-------|-------|--------|-------|-------|-------|
| RIMS3     | -0.133 | 0.296 | -0.447 | 0.655 | 0.876 | 0.26  | -0.478 | 0.633 | 0.49  | 1.566 |
| RIMS2     | 0.012  | 0.295 | 0.041  | 0.967 | 1.012 | 0.299 | 0.041  | 0.968 | 0.568 | 1.805 |
| RIMS1     | -0.05  | 0.296 | -0.169 | 0.866 | 0.951 | 0.281 | -0.173 | 0.863 | 0.533 | 1.698 |
| RIMBP2    | 0.421  | 0.3   | 1.406  | 0.16  | 1.524 | 0.456 | 1.147  | 0.251 | 0.847 | 2.741 |
| RIF1      | 0.663  | 0.306 | 2.17   | 0.03  | 1.941 | 0.593 | 1.586  | 0.113 | 1.066 | 3.532 |
| RIDA      | 0.441  | 0.299 | 1.478  | 0.14  | 1.555 | 0.464 | 1.195  | 0.232 | 0.866 | 2.792 |
| RIC8B     | -0.153 | 0.298 | -0.513 | 0.608 | 0.858 | 0.255 | -0.555 | 0.579 | 0.479 | 1.538 |
| RIC3      | -0.663 | 0.31  | -2.138 | 0.033 | 0.516 | 0.16  | -3.032 | 0.002 | 0.281 | 0.946 |
| RIBC2     | 1.026  | 0.318 | 3.226  | 0.001 | 2.79  | 0.887 | 2.017  | 0.044 | 1.496 | 5.204 |
| RHPN1-AS1 | 0.733  | 0.315 | 2.326  | 0.02  | 2.081 | 0.655 | 1.649  | 0.099 | 1.122 | 3.858 |
| RHOT2     | -0.386 | 0.299 | -1.29  | 0.197 | 0.68  | 0.203 | -1.575 | 0.115 | 0.379 | 1.221 |
| RHOT1     | 0.337  | 0.298 | 1.131  | 0.258 | 1.401 | 0.417 | 0.96   | 0.337 | 0.781 | 2.512 |
| RHOQ      | -0.625 | 0.304 | -2.059 | 0.04  | 0.535 | 0.162 | -2.86  | 0.004 | 0.295 | 0.97  |
| RHOH      | -0.854 | 0.315 | -2.712 | 0.007 | 0.426 | 0.134 | -4.283 | 0     | 0.23  | 0.789 |
| RHOG      | -0.398 | 0.298 | -1.335 | 0.182 | 0.672 | 0.2   | -1.64  | 0.101 | 0.374 | 1.205 |
| RHOF      | -0.438 | 0.299 | -1.465 | 0.143 | 0.645 | 0.193 | -1.838 | 0.066 | 0.359 | 1.159 |
| RHOD      | 0.071  | 0.295 | 0.239  | 0.811 | 1.073 | 0.317 | 0.231  | 0.817 | 0.602 | 1.915 |
| RHOBTB3   | -0.032 | 0.296 | -0.109 | 0.913 | 0.968 | 0.286 | -0.111 | 0.912 | 0.542 | 1.729 |
| RHOBTB2   | -0.168 | 0.296 | -0.567 | 0.571 | 0.845 | 0.25  | -0.618 | 0.537 | 0.473 | 1.51  |
| RHOBTB1   | -0.059 | 0.295 | -0.2   | 0.842 | 0.943 | 0.278 | -0.206 | 0.837 | 0.529 | 1.681 |
| RHOB      | -0.249 | 0.298 | -0.835 | 0.404 | 0.78  | 0.232 | -0.948 | 0.343 | 0.435 | 1.397 |
| RHOA      | -0.802 | 0.315 | -2.549 | 0.011 | 0.448 | 0.141 | -3.911 | 0     | 0.242 | 0.831 |
| RHO       | 0.625  | 0.304 | 2.058  | 0.04  | 1.868 | 0.567 | 1.53   | 0.126 | 1.03  | 3.386 |
| RHEB      | 0.443  | 0.3   | 1.477  | 0.14  | 1.557 | 0.467 | 1.193  | 0.233 | 0.865 | 2.801 |
| RHD       | -0.447 | 0.302 | -1.479 | 0.139 | 0.639 | 0.193 | -1.865 | 0.062 | 0.354 | 1.156 |
| RHCG      | 0.354  | 0.3   | 1.18   | 0.238 | 1.425 | 0.427 | 0.994  | 0.32  | 0.791 | 2.565 |
| RHBG      | 0.051  | 0.295 | 0.173  | 0.863 | 1.052 | 0.31  | 0.169  | 0.866 | 0.59  | 1.876 |
| RHBDL1    | 0.106  | 0.295 | 0.36   | 0.719 | 1.112 | 0.328 | 0.341  | 0.733 | 0.623 | 1.984 |
| RHBDF2    | 0.088  | 0.295 | 0.298  | 0.765 | 1.092 | 0.323 | 0.286  | 0.775 | 0.612 | 1.949 |
| RHBDF1    | 0.135  | 0.298 | 0.452  | 0.652 | 1.144 | 0.341 | 0.422  | 0.673 | 0.638 | 2.052 |
| RHBDD3    | 0.063  | 0.296 | 0.212  | 0.832 | 1.065 | 0.315 | 0.205  | 0.837 | 0.596 | 1.901 |
| RHAG      | 0.096  | 0.297 | 0.322  | 0.748 | 1.1   | 0.327 | 0.307  | 0.759 | 0.615 | 1.969 |
| RGSL1     | -0.976 | 0.322 | -3.031 | 0.002 | 0.377 | 0.121 | -5.135 | 0     | 0.201 | 0.708 |
| RGS9      | 0.37   | 0.298 | 1.243  | 0.214 | 1.448 | 0.432 | 1.039  | 0.299 | 0.808 | 2.597 |
| RGS7      | 0.228  | 0.296 | 0.772  | 0.44  | 1.256 | 0.372 | 0.69   | 0.49  | 0.704 | 2.243 |
| RGS6      | -0.025 | 0.295 | -0.084 | 0.933 | 0.975 | 0.288 | -0.085 | 0.932 | 0.547 | 1.74  |
| RGS5      | -0.722 | 0.31  | -2.329 | 0.02  | 0.486 | 0.151 | -3.414 | 0.001 | 0.265 | 0.892 |
| RGS4      | -0.351 | 0.298 | -1.176 | 0.239 | 0.704 | 0.21  | -1.409 | 0.159 | 0.392 | 1.263 |



|        |        |       |        |       |       |       |        |       |       |       |
|--------|--------|-------|--------|-------|-------|-------|--------|-------|-------|-------|
| RGS3   | 0.293  | 0.298 | 0.986  | 0.324 | 1.341 | 0.399 | 0.854  | 0.393 | 0.748 | 2.403 |
| RGS20  | 0.151  | 0.295 | 0.51   | 0.61  | 1.163 | 0.343 | 0.474  | 0.636 | 0.652 | 2.075 |
| RGS2   | -0.055 | 0.295 | -0.188 | 0.851 | 0.946 | 0.279 | -0.193 | 0.847 | 0.53  | 1.687 |
| RGS19  | 0.384  | 0.3   | 1.283  | 0.199 | 1.469 | 0.44  | 1.065  | 0.287 | 0.817 | 2.642 |
| RGS17  | -0.292 | 0.296 | -0.985 | 0.325 | 0.747 | 0.221 | -1.144 | 0.253 | 0.418 | 1.335 |
| RGS16  | -0.365 | 0.3   | -1.218 | 0.223 | 0.694 | 0.208 | -1.469 | 0.142 | 0.386 | 1.249 |
| RGS14  | 0.027  | 0.296 | 0.092  | 0.927 | 1.027 | 0.304 | 0.09   | 0.928 | 0.575 | 1.835 |
| RGS13  | -0.35  | 0.298 | -1.177 | 0.239 | 0.704 | 0.21  | -1.41  | 0.159 | 0.393 | 1.262 |
| RGS12  | 0.378  | 0.298 | 1.268  | 0.205 | 1.459 | 0.435 | 1.056  | 0.291 | 0.814 | 2.618 |
| RGS11  | 0.261  | 0.298 | 0.878  | 0.38  | 1.298 | 0.386 | 0.773  | 0.44  | 0.725 | 2.327 |
| RGS10  | -0.432 | 0.303 | -1.427 | 0.154 | 0.649 | 0.196 | -1.785 | 0.074 | 0.359 | 1.175 |
| RGS1   | -0.346 | 0.3   | -1.153 | 0.249 | 0.708 | 0.212 | -1.378 | 0.168 | 0.393 | 1.274 |
| RGR    | 0.339  | 0.3   | 1.131  | 0.258 | 1.403 | 0.42  | 0.96   | 0.337 | 0.78  | 2.525 |
| RGP1   | 0.248  | 0.296 | 0.838  | 0.402 | 1.282 | 0.38  | 0.742  | 0.458 | 0.717 | 2.291 |
| RGN    | -0.209 | 0.296 | -0.707 | 0.48  | 0.811 | 0.24  | -0.786 | 0.432 | 0.454 | 1.449 |
| RGL2   | -0.39  | 0.298 | -1.309 | 0.191 | 0.677 | 0.202 | -1.601 | 0.109 | 0.377 | 1.214 |
| RGL1   | -0.42  | 0.298 | -1.41  | 0.159 | 0.657 | 0.196 | -1.752 | 0.08  | 0.366 | 1.178 |
| RGCC   | -0.664 | 0.31  | -2.142 | 0.032 | 0.515 | 0.16  | -3.042 | 0.002 | 0.28  | 0.945 |
| RFXAP  | 0.656  | 0.307 | 2.137  | 0.033 | 1.926 | 0.591 | 1.568  | 0.117 | 1.056 | 3.515 |
| RFXANK | 0.6    | 0.302 | 1.986  | 0.047 | 1.822 | 0.55  | 1.494  | 0.135 | 1.008 | 3.292 |
| RFX7   | 0      | 0.296 | -0.001 | 1     | 1     | 0.296 | -0.001 | 1     | 0.56  | 1.786 |
| RFX5   | 0.375  | 0.298 | 1.257  | 0.209 | 1.455 | 0.434 | 1.048  | 0.294 | 0.811 | 2.61  |
| RFX4   | 0.742  | 0.315 | 2.355  | 0.019 | 2.1   | 0.661 | 1.663  | 0.096 | 1.132 | 3.893 |
| RFX3   | 0.313  | 0.3   | 1.044  | 0.296 | 1.368 | 0.41  | 0.897  | 0.37  | 0.76  | 2.462 |
| RFX2   | 0.01   | 0.295 | 0.035  | 0.972 | 1.01  | 0.298 | 0.035  | 0.972 | 0.566 | 1.802 |
| RFX1   | 0.264  | 0.296 | 0.891  | 0.373 | 1.302 | 0.385 | 0.783  | 0.433 | 0.729 | 2.326 |
| RFWD3  | 0.538  | 0.302 | 1.778  | 0.075 | 1.712 | 0.518 | 1.375  | 0.169 | 0.947 | 3.098 |
| RFTN1  | -0.701 | 0.306 | -2.292 | 0.022 | 0.496 | 0.152 | -3.322 | 0.001 | 0.272 | 0.903 |
| RFPL3S | 0.566  | 0.303 | 1.869  | 0.062 | 1.76  | 0.533 | 1.428  | 0.153 | 0.973 | 3.186 |
| RFPL3  | -0.122 | 0.3   | -0.407 | 0.684 | 0.885 | 0.266 | -0.433 | 0.665 | 0.492 | 1.593 |
| RFPL2  | -0.134 | 0.296 | -0.453 | 0.651 | 0.875 | 0.259 | -0.484 | 0.628 | 0.49  | 1.561 |
| RFPL1S | -0.414 | 0.298 | -1.387 | 0.165 | 0.661 | 0.197 | -1.718 | 0.086 | 0.369 | 1.186 |
| RFPL1  | 0.487  | 0.3   | 1.625  | 0.104 | 1.628 | 0.488 | 1.286  | 0.198 | 0.904 | 2.93  |
| RFNG   | 0.116  | 0.295 | 0.393  | 0.694 | 1.123 | 0.332 | 0.371  | 0.711 | 0.63  | 2.003 |
| RFK    | -0.389 | 0.302 | -1.288 | 0.198 | 0.677 | 0.205 | -1.574 | 0.115 | 0.374 | 1.225 |
| RFC5   | 0.579  | 0.3   | 1.929  | 0.054 | 1.784 | 0.536 | 1.464  | 0.143 | 0.991 | 3.214 |
| RFC4   | 0.789  | 0.31  | 2.546  | 0.011 | 2.201 | 0.682 | 1.761  | 0.078 | 1.199 | 4.039 |
| RFC3   | 0.68   | 0.306 | 2.223  | 0.026 | 1.974 | 0.604 | 1.613  | 0.107 | 1.084 | 3.595 |

|         |        |       |        |       |       |       |        |       |       |       |
|---------|--------|-------|--------|-------|-------|-------|--------|-------|-------|-------|
| RFC2    | 0.481  | 0.3   | 1.606  | 0.108 | 1.618 | 0.485 | 1.275  | 0.202 | 0.899 | 2.91  |
| RFC1    | 0.121  | 0.295 | 0.41   | 0.682 | 1.129 | 0.333 | 0.386  | 0.699 | 0.633 | 2.014 |
| REXO5   | 0.101  | 0.296 | 0.341  | 0.733 | 1.106 | 0.328 | 0.325  | 0.745 | 0.619 | 1.977 |
| REXO4   | -0.041 | 0.296 | -0.139 | 0.89  | 0.96  | 0.285 | -0.142 | 0.887 | 0.537 | 1.716 |
| REXO2   | -0.265 | 0.298 | -0.891 | 0.373 | 0.767 | 0.228 | -1.02  | 0.307 | 0.428 | 1.375 |
| REX1BD  | 0.132  | 0.297 | 0.444  | 0.657 | 1.141 | 0.339 | 0.416  | 0.678 | 0.638 | 2.041 |
| REV3L   | -0.123 | 0.296 | -0.416 | 0.678 | 0.884 | 0.262 | -0.442 | 0.658 | 0.495 | 1.58  |
| REV1    | 0.457  | 0.303 | 1.511  | 0.131 | 1.579 | 0.478 | 1.213  | 0.225 | 0.873 | 2.858 |
| RETSAT  | -0.432 | 0.3   | -1.44  | 0.15  | 0.649 | 0.195 | -1.801 | 0.072 | 0.361 | 1.169 |
| RETREG3 | 0.247  | 0.298 | 0.831  | 0.406 | 1.281 | 0.381 | 0.736  | 0.462 | 0.715 | 2.295 |
| RETREG2 | 0.055  | 0.296 | 0.186  | 0.852 | 1.057 | 0.313 | 0.181  | 0.856 | 0.591 | 1.887 |
| RETREG1 | 0.123  | 0.296 | 0.414  | 0.679 | 1.13  | 0.335 | 0.39   | 0.697 | 0.633 | 2.02  |
| RETN    | 0.371  | 0.3   | 1.238  | 0.216 | 1.449 | 0.434 | 1.034  | 0.301 | 0.806 | 2.606 |
| RET     | -0.25  | 0.298 | -0.84  | 0.401 | 0.779 | 0.232 | -0.954 | 0.34  | 0.435 | 1.396 |
| REST    | 0.236  | 0.298 | 0.794  | 0.427 | 1.267 | 0.377 | 0.707  | 0.48  | 0.706 | 2.271 |
| RESF1   | -0.132 | 0.296 | -0.445 | 0.656 | 0.877 | 0.259 | -0.476 | 0.634 | 0.491 | 1.565 |
| RERGL   | -0.19  | 0.296 | -0.641 | 0.521 | 0.827 | 0.245 | -0.706 | 0.48  | 0.463 | 1.478 |
| RERE    | -0.462 | 0.302 | -1.528 | 0.126 | 0.63  | 0.19  | -1.942 | 0.052 | 0.349 | 1.139 |
| RER1    | -1.106 | 0.328 | -3.37  | 0.001 | 0.331 | 0.109 | -6.162 | 0     | 0.174 | 0.63  |
| REPS2   | 0.311  | 0.297 | 1.044  | 0.296 | 1.364 | 0.406 | 0.898  | 0.369 | 0.762 | 2.444 |
| REPS1   | -0.224 | 0.297 | -0.757 | 0.449 | 0.799 | 0.237 | -0.848 | 0.396 | 0.447 | 1.429 |
| REPIN1  | -0.395 | 0.3   | -1.318 | 0.187 | 0.674 | 0.202 | -1.616 | 0.106 | 0.374 | 1.212 |
| RENBP   | 0.049  | 0.295 | 0.165  | 0.869 | 1.05  | 0.31  | 0.161  | 0.872 | 0.589 | 1.872 |
| REN     | -0.398 | 0.3   | -1.328 | 0.184 | 0.672 | 0.201 | -1.632 | 0.103 | 0.373 | 1.208 |
| REM1    | -0.057 | 0.295 | -0.192 | 0.848 | 0.945 | 0.279 | -0.197 | 0.844 | 0.53  | 1.686 |
| RELN    | -0.128 | 0.295 | -0.435 | 0.664 | 0.88  | 0.26  | -0.464 | 0.643 | 0.493 | 1.569 |
| RELB    | -0.269 | 0.3   | -0.897 | 0.37  | 0.764 | 0.229 | -1.029 | 0.303 | 0.424 | 1.376 |
| RELA    | -0.232 | 0.296 | -0.782 | 0.434 | 0.793 | 0.235 | -0.88  | 0.379 | 0.444 | 1.418 |
| REL     | -0.2   | 0.299 | -0.671 | 0.503 | 0.819 | 0.244 | -0.742 | 0.458 | 0.456 | 1.47  |
| REG3A   | 0.209  | 0.299 | 0.699  | 0.485 | 1.232 | 0.368 | 0.63   | 0.528 | 0.686 | 2.212 |
| REG1CP  | -0.42  | 0.302 | -1.391 | 0.164 | 0.657 | 0.198 | -1.729 | 0.084 | 0.363 | 1.188 |
| REG1B   | -0.204 | 0.297 | -0.687 | 0.492 | 0.816 | 0.242 | -0.762 | 0.446 | 0.456 | 1.459 |
| REG1A   | -0.167 | 0.296 | -0.564 | 0.573 | 0.846 | 0.251 | -0.614 | 0.539 | 0.474 | 1.512 |
| REEP5   | -0.126 | 0.296 | -0.426 | 0.67  | 0.881 | 0.261 | -0.454 | 0.65  | 0.493 | 1.575 |
| REEP4   | 0.042  | 0.296 | 0.141  | 0.888 | 1.043 | 0.308 | 0.138  | 0.89  | 0.584 | 1.862 |
| REEP2   | 0.195  | 0.296 | 0.658  | 0.511 | 1.215 | 0.36  | 0.598  | 0.55  | 0.68  | 2.171 |
| REEP1   | -0.521 | 0.311 | -1.678 | 0.093 | 0.594 | 0.184 | -2.203 | 0.028 | 0.323 | 1.092 |
| RECQL5  | 0.042  | 0.296 | 0.142  | 0.887 | 1.043 | 0.308 | 0.139  | 0.889 | 0.584 | 1.861 |

|        |        |       |        |       |       |       |        |       |       |       |
|--------|--------|-------|--------|-------|-------|-------|--------|-------|-------|-------|
| RECQL4 | 0.737  | 0.31  | 2.38   | 0.017 | 2.09  | 0.647 | 1.684  | 0.092 | 1.139 | 3.836 |
| RECQL  | -0.236 | 0.296 | -0.797 | 0.425 | 0.79  | 0.234 | -0.899 | 0.369 | 0.442 | 1.41  |
| RECK   | 0.342  | 0.298 | 1.147  | 0.251 | 1.407 | 0.419 | 0.971  | 0.331 | 0.785 | 2.524 |
| REC8   | 0.03   | 0.296 | 0.1    | 0.92  | 1.03  | 0.305 | 0.098  | 0.922 | 0.577 | 1.84  |
| RDX    | -0.456 | 0.3   | -1.517 | 0.129 | 0.634 | 0.19  | -1.922 | 0.055 | 0.352 | 1.142 |
| RDH8   | 0.293  | 0.297 | 0.989  | 0.323 | 1.341 | 0.398 | 0.857  | 0.391 | 0.75  | 2.399 |
| RDH16  | 0.361  | 0.298 | 1.211  | 0.226 | 1.434 | 0.427 | 1.017  | 0.309 | 0.8   | 2.572 |
| RDH11  | -0.291 | 0.298 | -0.978 | 0.328 | 0.747 | 0.222 | -1.135 | 0.256 | 0.417 | 1.339 |
| RCVRN  | 0.475  | 0.306 | 1.554  | 0.12  | 1.608 | 0.492 | 1.237  | 0.216 | 0.883 | 2.928 |
| RCOR3  | 0.455  | 0.299 | 1.52   | 0.129 | 1.576 | 0.472 | 1.221  | 0.222 | 0.877 | 2.833 |
| RCOR1  | 0.009  | 0.297 | 0.03   | 0.976 | 1.009 | 0.299 | 0.03   | 0.976 | 0.564 | 1.805 |
| RCN3   | -0.856 | 0.315 | -2.717 | 0.007 | 0.425 | 0.134 | -4.295 | 0     | 0.229 | 0.788 |
| RCN2   | 0.001  | 0.296 | 0.002  | 0.998 | 1.001 | 0.296 | 0.002  | 0.998 | 0.561 | 1.786 |
| RCN1   | 0.068  | 0.297 | 0.23   | 0.818 | 1.07  | 0.318 | 0.222  | 0.824 | 0.599 | 1.914 |
| RCL1   | -0.252 | 0.299 | -0.844 | 0.399 | 0.777 | 0.232 | -0.96  | 0.337 | 0.433 | 1.396 |
| RCHY1  | -0.064 | 0.298 | -0.214 | 0.831 | 0.938 | 0.279 | -0.221 | 0.825 | 0.524 | 1.682 |
| RCE1   | -0.247 | 0.298 | -0.829 | 0.407 | 0.781 | 0.233 | -0.941 | 0.347 | 0.436 | 1.4   |
| RCC1L  | 0.031  | 0.296 | 0.104  | 0.917 | 1.031 | 0.305 | 0.103  | 0.918 | 0.578 | 1.842 |
| RCC1   | 0.594  | 0.306 | 1.943  | 0.052 | 1.811 | 0.553 | 1.465  | 0.143 | 0.995 | 3.297 |
| RCBTB2 | -0.356 | 0.298 | -1.194 | 0.232 | 0.701 | 0.209 | -1.434 | 0.152 | 0.391 | 1.256 |
| RCBTB1 | 0.078  | 0.296 | 0.263  | 0.793 | 1.081 | 0.319 | 0.253  | 0.801 | 0.606 | 1.929 |
| RCAN3  | 0.476  | 0.3   | 1.586  | 0.113 | 1.609 | 0.483 | 1.262  | 0.207 | 0.894 | 2.897 |
| RCAN2  | -0.637 | 0.306 | -2.082 | 0.037 | 0.529 | 0.162 | -2.911 | 0.004 | 0.291 | 0.963 |
| RCAN1  | 0.015  | 0.296 | 0.052  | 0.958 | 1.016 | 0.3   | 0.052  | 0.959 | 0.569 | 1.813 |
| RC3H2  | 0.278  | 0.296 | 0.937  | 0.349 | 1.32  | 0.391 | 0.818  | 0.413 | 0.739 | 2.359 |
| RC3H1  | 0.347  | 0.3   | 1.156  | 0.248 | 1.414 | 0.424 | 0.977  | 0.329 | 0.786 | 2.546 |
| RBX1   | 0.513  | 0.302 | 1.698  | 0.09  | 1.671 | 0.505 | 1.328  | 0.184 | 0.924 | 3.021 |
| RPMS   | -0.035 | 0.297 | -0.117 | 0.907 | 0.966 | 0.287 | -0.119 | 0.906 | 0.54  | 1.728 |
| RBPJL  | -0.438 | 0.3   | -1.46  | 0.144 | 0.645 | 0.193 | -1.832 | 0.067 | 0.359 | 1.161 |
| RBPJ   | -0.549 | 0.301 | -1.826 | 0.068 | 0.577 | 0.174 | -2.433 | 0.015 | 0.32  | 1.041 |
| RBP4   | 0.082  | 0.295 | 0.279  | 0.78  | 1.086 | 0.321 | 0.268  | 0.789 | 0.609 | 1.937 |
| RBP3   | 0.46   | 0.3   | 1.532  | 0.126 | 1.584 | 0.475 | 1.228  | 0.219 | 0.879 | 2.851 |
| RBP1   | 0.496  | 0.302 | 1.643  | 0.1   | 1.641 | 0.495 | 1.296  | 0.195 | 0.909 | 2.965 |
| RBMXL2 | 0.094  | 0.3   | 0.313  | 0.754 | 1.098 | 0.329 | 0.299  | 0.765 | 0.611 | 1.976 |
| RBMX2  | 0.66   | 0.306 | 2.161  | 0.031 | 1.936 | 0.592 | 1.581  | 0.114 | 1.063 | 3.524 |
| RBMS3  | -0.468 | 0.299 | -1.567 | 0.117 | 0.626 | 0.187 | -1.998 | 0.046 | 0.349 | 1.125 |
| RBMS2  | -0.383 | 0.3   | -1.28  | 0.201 | 0.682 | 0.204 | -1.559 | 0.119 | 0.379 | 1.226 |
| RBMS1  | -0.01  | 0.298 | -0.034 | 0.973 | 0.99  | 0.295 | -0.034 | 0.973 | 0.552 | 1.775 |

|            |        |       |        |       |       |       |        |       |       |       |
|------------|--------|-------|--------|-------|-------|-------|--------|-------|-------|-------|
| RBM8A      | 0.126  | 0.295 | 0.427  | 0.67  | 1.134 | 0.335 | 0.401  | 0.688 | 0.636 | 2.024 |
| RBM7       | -0.623 | 0.306 | -2.038 | 0.042 | 0.536 | 0.164 | -2.828 | 0.005 | 0.295 | 0.976 |
| RBM6       | -0.258 | 0.297 | -0.869 | 0.385 | 0.772 | 0.23  | -0.991 | 0.322 | 0.431 | 1.383 |
| RBM5       | -0.638 | 0.306 | -2.086 | 0.037 | 0.528 | 0.162 | -2.918 | 0.004 | 0.29  | 0.962 |
| RBM4B      | -0.202 | 0.296 | -0.682 | 0.495 | 0.817 | 0.242 | -0.755 | 0.45  | 0.457 | 1.46  |
| RBM48      | 0.085  | 0.295 | 0.287  | 0.774 | 1.088 | 0.321 | 0.275  | 0.783 | 0.61  | 1.942 |
| RBM47      | -0.027 | 0.296 | -0.09  | 0.928 | 0.974 | 0.288 | -0.091 | 0.927 | 0.545 | 1.74  |
| RBM42      | 0.004  | 0.296 | 0.012  | 0.99  | 1.004 | 0.297 | 0.012  | 0.99  | 0.562 | 1.794 |
| RBM41      | 0.009  | 0.295 | 0.032  | 0.974 | 1.01  | 0.298 | 0.032  | 0.975 | 0.566 | 1.801 |
| RBM39      | -0.158 | 0.297 | -0.531 | 0.596 | 0.854 | 0.254 | -0.575 | 0.565 | 0.477 | 1.529 |
| RBM38      | 0.564  | 0.306 | 1.846  | 0.065 | 1.758 | 0.538 | 1.41   | 0.158 | 0.966 | 3.201 |
| RBM34      | 0.176  | 0.297 | 0.593  | 0.553 | 1.193 | 0.354 | 0.544  | 0.586 | 0.666 | 2.134 |
| RBM3       | -0.34  | 0.3   | -1.135 | 0.256 | 0.712 | 0.213 | -1.352 | 0.176 | 0.396 | 1.28  |
| RBM28      | 0.631  | 0.306 | 2.065  | 0.039 | 1.879 | 0.574 | 1.531  | 0.126 | 1.033 | 3.421 |
| RBM26      | -0.087 | 0.296 | -0.294 | 0.769 | 0.917 | 0.271 | -0.307 | 0.758 | 0.513 | 1.637 |
| RBM25      | -0.138 | 0.296 | -0.468 | 0.64  | 0.871 | 0.257 | -0.502 | 0.616 | 0.488 | 1.554 |
| RBM23      | 0.217  | 0.296 | 0.732  | 0.464 | 1.242 | 0.368 | 0.658  | 0.51  | 0.695 | 2.219 |
| RBM22      | 0.049  | 0.295 | 0.166  | 0.868 | 1.05  | 0.31  | 0.162  | 0.872 | 0.589 | 1.873 |
| RBM19      | -0.063 | 0.295 | -0.215 | 0.83  | 0.939 | 0.277 | -0.222 | 0.825 | 0.527 | 1.673 |
| RBM17      | 0.317  | 0.298 | 1.066  | 0.286 | 1.373 | 0.409 | 0.913  | 0.361 | 0.766 | 2.461 |
| RBM15B     | 0.408  | 0.303 | 1.348  | 0.178 | 1.504 | 0.456 | 1.106  | 0.269 | 0.831 | 2.725 |
| RBM15      | 0.469  | 0.302 | 1.552  | 0.121 | 1.598 | 0.483 | 1.239  | 0.215 | 0.884 | 2.89  |
| RBM14      | 0.203  | 0.296 | 0.685  | 0.493 | 1.225 | 0.363 | 0.62   | 0.535 | 0.686 | 2.189 |
| RBM12B-AS1 | 0.122  | 0.295 | 0.414  | 0.679 | 1.13  | 0.334 | 0.39   | 0.697 | 0.634 | 2.016 |
| RBM12B     | -0.266 | 0.297 | -0.896 | 0.37  | 0.767 | 0.228 | -1.026 | 0.305 | 0.429 | 1.371 |
| RBM12      | 0.659  | 0.306 | 2.152  | 0.031 | 1.933 | 0.592 | 1.576  | 0.115 | 1.06  | 3.522 |
| RBM10      | 0.074  | 0.296 | 0.249  | 0.803 | 1.076 | 0.318 | 0.24   | 0.81  | 0.603 | 1.922 |
| RBL2       | -0.449 | 0.3   | -1.494 | 0.135 | 0.639 | 0.192 | -1.885 | 0.059 | 0.354 | 1.15  |
| RBL1       | 0.676  | 0.31  | 2.184  | 0.029 | 1.966 | 0.609 | 1.587  | 0.112 | 1.072 | 3.607 |
| RBKS       | -0.43  | 0.307 | -1.401 | 0.161 | 0.651 | 0.2   | -1.75  | 0.08  | 0.357 | 1.187 |
| RBFOX2     | -0.588 | 0.301 | -1.95  | 0.051 | 0.556 | 0.167 | -2.654 | 0.008 | 0.308 | 1.003 |
| RBFOX1     | 0.35   | 0.297 | 1.176  | 0.24  | 1.419 | 0.422 | 0.992  | 0.321 | 0.792 | 2.541 |
| RBFA DN    | -0.082 | 0.295 | -0.277 | 0.782 | 0.922 | 0.272 | -0.288 | 0.773 | 0.517 | 1.644 |
| RBFA       | 0.405  | 0.298 | 1.362  | 0.173 | 1.5   | 0.446 | 1.12   | 0.263 | 0.837 | 2.688 |
| RBCK1      | 0.018  | 0.295 | 0.059  | 0.953 | 1.018 | 0.301 | 0.059  | 0.953 | 0.57  | 1.816 |
| RBBP9      | -0.112 | 0.296 | -0.379 | 0.705 | 0.894 | 0.265 | -0.401 | 0.688 | 0.5   | 1.597 |
| RBBP8      | -0.181 | 0.298 | -0.609 | 0.543 | 0.834 | 0.248 | -0.667 | 0.504 | 0.465 | 1.495 |
| RBBP7      | 0.612  | 0.306 | 2.004  | 0.045 | 1.845 | 0.564 | 1.498  | 0.134 | 1.013 | 3.358 |

|          |        |       |        |       |       |       |        |       |       |       |
|----------|--------|-------|--------|-------|-------|-------|--------|-------|-------|-------|
| RBBP6    | 0.143  | 0.298 | 0.481  | 0.631 | 1.154 | 0.344 | 0.448  | 0.654 | 0.643 | 2.071 |
| RBBP5    | 0.351  | 0.3   | 1.171  | 0.242 | 1.421 | 0.426 | 0.988  | 0.323 | 0.789 | 2.558 |
| RBBP4    | -0.431 | 0.3   | -1.433 | 0.152 | 0.65  | 0.195 | -1.791 | 0.073 | 0.361 | 1.171 |
| RB1CC1   | -0.107 | 0.296 | -0.36  | 0.719 | 0.899 | 0.266 | -0.38  | 0.704 | 0.503 | 1.606 |
| RB1      | 0.102  | 0.295 | 0.345  | 0.73  | 1.107 | 0.327 | 0.328  | 0.743 | 0.62  | 1.976 |
| RAX      | 0.146  | 0.295 | 0.493  | 0.622 | 1.157 | 0.342 | 0.459  | 0.646 | 0.648 | 2.064 |
| RAVER2   | -0.07  | 0.296 | -0.237 | 0.812 | 0.932 | 0.276 | -0.246 | 0.806 | 0.522 | 1.664 |
| RASSF9   | -0.058 | 0.296 | -0.197 | 0.844 | 0.943 | 0.279 | -0.203 | 0.839 | 0.528 | 1.686 |
| RASSF8   | 0.271  | 0.297 | 0.915  | 0.36  | 1.312 | 0.389 | 0.802  | 0.423 | 0.734 | 2.346 |
| RASSF7   | -0.026 | 0.295 | -0.087 | 0.93  | 0.975 | 0.288 | -0.088 | 0.93  | 0.546 | 1.738 |
| RASSF4   | 0.01   | 0.296 | 0.032  | 0.974 | 1.01  | 0.299 | 0.032  | 0.974 | 0.566 | 1.803 |
| RASSF2   | -0.748 | 0.307 | -2.439 | 0.015 | 0.473 | 0.145 | -3.629 | 0     | 0.259 | 0.863 |
| RASSF1   | -0.647 | 0.311 | -2.082 | 0.037 | 0.524 | 0.163 | -2.928 | 0.003 | 0.285 | 0.963 |
| RASL12   | -0.119 | 0.297 | -0.401 | 0.688 | 0.888 | 0.264 | -0.426 | 0.67  | 0.496 | 1.589 |
| RASL11B  | -0.073 | 0.295 | -0.247 | 0.805 | 0.93  | 0.274 | -0.256 | 0.798 | 0.521 | 1.658 |
| RASL10A  | 0.012  | 0.295 | 0.04   | 0.968 | 1.012 | 0.298 | 0.039  | 0.969 | 0.568 | 1.804 |
| RASIP1   | -0.171 | 0.296 | -0.577 | 0.564 | 0.843 | 0.25  | -0.629 | 0.529 | 0.472 | 1.506 |
| RASGRP3  | -0.36  | 0.298 | -1.208 | 0.227 | 0.698 | 0.208 | -1.454 | 0.146 | 0.389 | 1.251 |
| RASGRP2  | 0.286  | 0.298 | 0.962  | 0.336 | 1.332 | 0.397 | 0.836  | 0.403 | 0.743 | 2.387 |
| RASGRP1  | 0.296  | 0.298 | 0.995  | 0.32  | 1.345 | 0.4   | 0.861  | 0.389 | 0.75  | 2.409 |
| RASGRF1  | 0.252  | 0.297 | 0.85   | 0.395 | 1.287 | 0.382 | 0.751  | 0.453 | 0.719 | 2.304 |
| RASAL2   | 0.094  | 0.296 | 0.317  | 0.751 | 1.099 | 0.325 | 0.303  | 0.762 | 0.615 | 1.963 |
| RASAL1   | 0.352  | 0.303 | 1.161  | 0.246 | 1.421 | 0.431 | 0.979  | 0.328 | 0.785 | 2.574 |
| RASA3    | -0.294 | 0.298 | -0.988 | 0.323 | 0.745 | 0.222 | -1.148 | 0.251 | 0.416 | 1.336 |
| RASA2    | 0.265  | 0.298 | 0.889  | 0.374 | 1.303 | 0.388 | 0.781  | 0.435 | 0.727 | 2.335 |
| RASA1    | 0.266  | 0.298 | 0.893  | 0.372 | 1.304 | 0.388 | 0.784  | 0.433 | 0.728 | 2.337 |
| RARS2    | 0.116  | 0.297 | 0.39   | 0.697 | 1.123 | 0.333 | 0.368  | 0.713 | 0.628 | 2.008 |
| RARS1    | -0.404 | 0.302 | -1.336 | 0.182 | 0.668 | 0.202 | -1.646 | 0.1   | 0.369 | 1.208 |
| RARRES2  | -0.497 | 0.302 | -1.645 | 0.1   | 0.608 | 0.184 | -2.132 | 0.033 | 0.336 | 1.1   |
| RARRES1  | 0.114  | 0.3   | 0.381  | 0.703 | 1.121 | 0.336 | 0.36   | 0.719 | 0.623 | 2.017 |
| RARG     | -0.047 | 0.296 | -0.158 | 0.874 | 0.954 | 0.282 | -0.162 | 0.871 | 0.534 | 1.704 |
| RARB     | -0.368 | 0.298 | -1.234 | 0.217 | 0.692 | 0.206 | -1.492 | 0.136 | 0.386 | 1.242 |
| RARA     | 0.664  | 0.306 | 2.17   | 0.03  | 1.942 | 0.594 | 1.586  | 0.113 | 1.066 | 3.538 |
| RAPSN    | 0.372  | 0.298 | 1.247  | 0.212 | 1.45  | 0.432 | 1.042  | 0.297 | 0.809 | 2.599 |
| RAPGEFL1 | 0.29   | 0.298 | 0.975  | 0.329 | 1.337 | 0.398 | 0.847  | 0.397 | 0.746 | 2.395 |
| RAPGEF6  | -0.376 | 0.3   | -1.256 | 0.209 | 0.686 | 0.206 | -1.525 | 0.127 | 0.382 | 1.235 |
| RAPGEF5  | 0.372  | 0.298 | 1.251  | 0.211 | 1.451 | 0.432 | 1.044  | 0.296 | 0.81  | 2.6   |
| RAPGEF4  | -0.531 | 0.306 | -1.737 | 0.082 | 0.588 | 0.18  | -2.293 | 0.022 | 0.323 | 1.07  |

|          |        |       |        |       |       |       |        |       |       |       |
|----------|--------|-------|--------|-------|-------|-------|--------|-------|-------|-------|
| RAPGEF3  | 0.024  | 0.295 | 0.081  | 0.936 | 1.024 | 0.302 | 0.08   | 0.936 | 0.574 | 1.826 |
| RAPGEF2  | -0.285 | 0.297 | -0.962 | 0.336 | 0.752 | 0.223 | -1.113 | 0.266 | 0.42  | 1.345 |
| RAPGEF1  | -0.158 | 0.296 | -0.534 | 0.593 | 0.854 | 0.253 | -0.579 | 0.563 | 0.478 | 1.525 |
| RAP2C    | 0.453  | 0.301 | 1.505  | 0.132 | 1.573 | 0.473 | 1.21   | 0.226 | 0.872 | 2.837 |
| RAP2B    | 0.457  | 0.302 | 1.511  | 0.131 | 1.579 | 0.478 | 1.213  | 0.225 | 0.873 | 2.857 |
| RAP2A    | 0.599  | 0.303 | 1.978  | 0.048 | 1.82  | 0.551 | 1.488  | 0.137 | 1.005 | 3.294 |
| RAP1GDS1 | 0.446  | 0.298 | 1.496  | 0.135 | 1.561 | 0.465 | 1.207  | 0.227 | 0.871 | 2.8   |
| RAP1GAP2 | -0.098 | 0.296 | -0.331 | 0.741 | 0.907 | 0.268 | -0.348 | 0.728 | 0.508 | 1.619 |
| RAP1GAP  | -0.192 | 0.296 | -0.648 | 0.517 | 0.825 | 0.244 | -0.715 | 0.475 | 0.462 | 1.475 |
| RAP1B    | -0.003 | 0.297 | -0.011 | 0.991 | 0.997 | 0.296 | -0.011 | 0.991 | 0.556 | 1.785 |
| RAP1A    | -0.197 | 0.298 | -0.66  | 0.509 | 0.822 | 0.245 | -0.729 | 0.466 | 0.458 | 1.473 |
| RANGRF   | -0.141 | 0.296 | -0.474 | 0.635 | 0.869 | 0.257 | -0.509 | 0.611 | 0.486 | 1.553 |
| RANGAP1  | 0.35   | 0.298 | 1.177  | 0.239 | 1.42  | 0.423 | 0.993  | 0.321 | 0.792 | 2.544 |
| RANBP9   | 0.369  | 0.3   | 1.232  | 0.218 | 1.446 | 0.433 | 1.03   | 0.303 | 0.804 | 2.601 |
| RANBP6   | -0.115 | 0.297 | -0.387 | 0.699 | 0.891 | 0.264 | -0.41  | 0.681 | 0.498 | 1.594 |
| RANBP3   | -0.047 | 0.296 | -0.16  | 0.873 | 0.954 | 0.282 | -0.163 | 0.87  | 0.534 | 1.703 |
| RANBP2   | 0.145  | 0.299 | 0.485  | 0.628 | 1.156 | 0.346 | 0.452  | 0.652 | 0.643 | 2.079 |
| RANBP17  | 0.223  | 0.296 | 0.752  | 0.452 | 1.249 | 0.37  | 0.674  | 0.5   | 0.699 | 2.232 |
| RANBP10  | 0.333  | 0.298 | 1.119  | 0.263 | 1.395 | 0.415 | 0.952  | 0.341 | 0.779 | 2.499 |
| RANBP1   | 1.031  | 0.321 | 3.212  | 0.001 | 2.805 | 0.901 | 2.004  | 0.045 | 1.495 | 5.264 |
| RAN      | 0.454  | 0.303 | 1.497  | 0.134 | 1.574 | 0.477 | 1.204  | 0.229 | 0.869 | 2.85  |
| RAMP3    | -0.056 | 0.295 | -0.19  | 0.85  | 0.946 | 0.279 | -0.195 | 0.845 | 0.53  | 1.686 |
| RAMP2    | -0.497 | 0.307 | -1.622 | 0.105 | 0.608 | 0.186 | -2.101 | 0.036 | 0.334 | 1.109 |
| RAMP1    | 0.084  | 0.295 | 0.285  | 0.776 | 1.088 | 0.321 | 0.273  | 0.785 | 0.61  | 1.94  |
| RALYL    | 0.255  | 0.297 | 0.858  | 0.391 | 1.291 | 0.384 | 0.757  | 0.449 | 0.72  | 2.312 |
| RALY     | 0.399  | 0.3   | 1.331  | 0.183 | 1.49  | 0.447 | 1.097  | 0.273 | 0.828 | 2.682 |
| RALGPS2  | -0.366 | 0.298 | -1.226 | 0.22  | 0.694 | 0.207 | -1.481 | 0.139 | 0.387 | 1.244 |
| RALGPS1  | -0.307 | 0.3   | -1.024 | 0.306 | 0.736 | 0.221 | -1.199 | 0.231 | 0.409 | 1.324 |
| RALGDS   | -0.175 | 0.296 | -0.592 | 0.554 | 0.839 | 0.249 | -0.647 | 0.518 | 0.47  | 1.5   |
| RALGAPB  | -0.225 | 0.296 | -0.76  | 0.447 | 0.798 | 0.236 | -0.853 | 0.394 | 0.447 | 1.427 |
| RALGAPA1 | -0.571 | 0.304 | -1.88  | 0.06  | 0.565 | 0.172 | -2.536 | 0.011 | 0.312 | 1.025 |
| RALBP1   | -0.231 | 0.298 | -0.776 | 0.437 | 0.794 | 0.236 | -0.873 | 0.382 | 0.443 | 1.422 |
| RALB     | -0.034 | 0.295 | -0.115 | 0.908 | 0.966 | 0.285 | -0.117 | 0.906 | 0.542 | 1.723 |
| RALA     | 1.033  | 0.321 | 3.218  | 0.001 | 2.811 | 0.903 | 2.006  | 0.045 | 1.498 | 5.274 |
| RAI2     | -0.432 | 0.307 | -1.408 | 0.159 | 0.649 | 0.199 | -1.761 | 0.078 | 0.356 | 1.185 |
| RAI14    | -0.581 | 0.306 | -1.9   | 0.057 | 0.56  | 0.171 | -2.576 | 0.01  | 0.307 | 1.018 |
| RAI1     | 0.001  | 0.295 | 0.005  | 0.996 | 1.001 | 0.296 | 0.005  | 0.996 | 0.561 | 1.786 |
| RAG2     | -0.556 | 0.306 | -1.818 | 0.069 | 0.574 | 0.175 | -2.431 | 0.015 | 0.315 | 1.044 |

|          |        |       |        |       |       |       |        |       |       |       |
|----------|--------|-------|--------|-------|-------|-------|--------|-------|-------|-------|
| RAG1     | -0.04  | 0.295 | -0.135 | 0.893 | 0.961 | 0.284 | -0.138 | 0.891 | 0.538 | 1.715 |
| RAF1     | -0.097 | 0.295 | -0.328 | 0.743 | 0.908 | 0.268 | -0.345 | 0.73  | 0.509 | 1.619 |
| RAE1     | 1.056  | 0.328 | 3.223  | 0.001 | 2.875 | 0.942 | 1.99   | 0.047 | 1.513 | 5.463 |
| RADX     | -0.294 | 0.298 | -0.988 | 0.323 | 0.745 | 0.222 | -1.149 | 0.251 | 0.416 | 1.336 |
| RAD9A    | 0.4    | 0.3   | 1.334  | 0.182 | 1.491 | 0.447 | 1.099  | 0.272 | 0.829 | 2.683 |
| RAD54L2  | 0.694  | 0.308 | 2.256  | 0.024 | 2.002 | 0.616 | 1.627  | 0.104 | 1.095 | 3.66  |
| RAD54L   | 1.053  | 0.321 | 3.276  | 0.001 | 2.865 | 0.921 | 2.026  | 0.043 | 1.526 | 5.38  |
| RAD54B   | 0.399  | 0.3   | 1.332  | 0.183 | 1.49  | 0.446 | 1.098  | 0.272 | 0.829 | 2.681 |
| RAD52    | -0.076 | 0.296 | -0.257 | 0.797 | 0.927 | 0.274 | -0.268 | 0.789 | 0.519 | 1.654 |
| RAD51D   | -0.318 | 0.299 | -1.062 | 0.288 | 0.728 | 0.218 | -1.25  | 0.211 | 0.405 | 1.309 |
| RAD51C   | 0.156  | 0.295 | 0.527  | 0.598 | 1.169 | 0.345 | 0.488  | 0.625 | 0.655 | 2.085 |
| RAD51B   | -0.231 | 0.301 | -0.767 | 0.443 | 0.794 | 0.239 | -0.862 | 0.388 | 0.44  | 1.432 |
| RAD51AP1 | 0.978  | 0.321 | 3.051  | 0.002 | 2.66  | 0.853 | 1.946  | 0.052 | 1.419 | 4.986 |
| RAD51    | 0.478  | 0.3   | 1.597  | 0.11  | 1.613 | 0.483 | 1.269  | 0.204 | 0.897 | 2.902 |
| RAD50    | -0.076 | 0.295 | -0.259 | 0.796 | 0.926 | 0.273 | -0.269 | 0.788 | 0.52  | 1.652 |
| RAD23B   | -0.157 | 0.296 | -0.53  | 0.596 | 0.855 | 0.253 | -0.574 | 0.566 | 0.479 | 1.526 |
| RAD23A   | 0.097  | 0.297 | 0.328  | 0.743 | 1.102 | 0.327 | 0.313  | 0.755 | 0.616 | 1.971 |
| RAD21L1  | 0.096  | 0.295 | 0.325  | 0.745 | 1.101 | 0.325 | 0.31   | 0.757 | 0.617 | 1.964 |
| RAD21    | 0.765  | 0.31  | 2.47   | 0.014 | 2.15  | 0.666 | 1.726  | 0.084 | 1.171 | 3.945 |
| RAD17    | -0.146 | 0.296 | -0.493 | 0.622 | 0.864 | 0.256 | -0.531 | 0.595 | 0.483 | 1.545 |
| RAD1     | 0.823  | 0.315 | 2.614  | 0.009 | 2.278 | 0.718 | 1.781  | 0.075 | 1.229 | 4.225 |
| RACGAP1  | 0.844  | 0.315 | 2.683  | 0.007 | 2.327 | 0.732 | 1.812  | 0.07  | 1.256 | 4.312 |
| RAC3     | -0.009 | 0.295 | -0.032 | 0.975 | 0.991 | 0.293 | -0.032 | 0.974 | 0.555 | 1.768 |
| RAC2     | -0.572 | 0.303 | -1.889 | 0.059 | 0.565 | 0.171 | -2.549 | 0.011 | 0.312 | 1.022 |
| RAC1     | 0.045  | 0.296 | 0.153  | 0.878 | 1.046 | 0.31  | 0.15   | 0.881 | 0.586 | 1.87  |
| RABL6    | -0.067 | 0.295 | -0.227 | 0.821 | 0.935 | 0.276 | -0.234 | 0.815 | 0.525 | 1.668 |
| RABL3    | -0.065 | 0.296 | -0.22  | 0.826 | 0.937 | 0.277 | -0.227 | 0.82  | 0.525 | 1.673 |
| RABIF    | 0.322  | 0.296 | 1.085  | 0.278 | 1.379 | 0.409 | 0.928  | 0.353 | 0.772 | 2.466 |
| RABGGTB  | 0.016  | 0.296 | 0.053  | 0.957 | 1.016 | 0.3   | 0.053  | 0.958 | 0.569 | 1.814 |
| RABGGTA  | 0.015  | 0.295 | 0.051  | 0.959 | 1.015 | 0.3   | 0.051  | 0.96  | 0.569 | 1.811 |
| RABGAP1L | -0.086 | 0.295 | -0.292 | 0.77  | 0.917 | 0.271 | -0.305 | 0.76  | 0.514 | 1.637 |
| RABGAP1  | -0.47  | 0.301 | -1.561 | 0.119 | 0.625 | 0.188 | -1.993 | 0.046 | 0.346 | 1.128 |
| RABEPK   | 0.326  | 0.297 | 1.1    | 0.271 | 1.386 | 0.411 | 0.938  | 0.348 | 0.775 | 2.478 |
| RABEP2   | -0.088 | 0.295 | -0.299 | 0.765 | 0.915 | 0.27  | -0.313 | 0.754 | 0.513 | 1.633 |
| RABEP1   | -0.069 | 0.297 | -0.231 | 0.817 | 0.934 | 0.277 | -0.24  | 0.811 | 0.522 | 1.67  |
| RABAC1   | 0.315  | 0.297 | 1.058  | 0.29  | 1.37  | 0.407 | 0.908  | 0.364 | 0.765 | 2.452 |
| RAB9BP1  | 0.407  | 0.3   | 1.357  | 0.175 | 1.502 | 0.45  | 1.115  | 0.265 | 0.835 | 2.704 |
| RAB9A    | 0.05   | 0.295 | 0.171  | 0.864 | 1.052 | 0.311 | 0.167  | 0.868 | 0.589 | 1.877 |

|          |        |       |        |       |       |       |        |       |       |       |
|----------|--------|-------|--------|-------|-------|-------|--------|-------|-------|-------|
| RAB8B    | -0.07  | 0.297 | -0.237 | 0.813 | 0.932 | 0.277 | -0.245 | 0.806 | 0.521 | 1.669 |
| RAB8A    | 0.297  | 0.298 | 0.995  | 0.32  | 1.346 | 0.402 | 0.861  | 0.389 | 0.75  | 2.415 |
| RAB7A    | -0.449 | 0.302 | -1.485 | 0.138 | 0.638 | 0.193 | -1.874 | 0.061 | 0.353 | 1.155 |
| RAB6B    | 0.168  | 0.299 | 0.562  | 0.574 | 1.183 | 0.353 | 0.517  | 0.605 | 0.658 | 2.125 |
| RAB5C    | 0.579  | 0.306 | 1.892  | 0.058 | 1.784 | 0.546 | 1.436  | 0.151 | 0.979 | 3.251 |
| RAB5B    | -0.656 | 0.307 | -2.14  | 0.032 | 0.519 | 0.159 | -3.025 | 0.002 | 0.284 | 0.946 |
| RAB5A    | 0.387  | 0.298 | 1.299  | 0.194 | 1.472 | 0.438 | 1.077  | 0.281 | 0.821 | 2.639 |
| RAB40C   | -0.849 | 0.315 | -2.697 | 0.007 | 0.428 | 0.135 | -4.249 | 0     | 0.231 | 0.793 |
| RAB40B   | -0.344 | 0.298 | -1.153 | 0.249 | 0.709 | 0.211 | -1.376 | 0.169 | 0.395 | 1.272 |
| RAB40AL  | -0.379 | 0.3   | -1.264 | 0.206 | 0.685 | 0.205 | -1.537 | 0.124 | 0.381 | 1.232 |
| RAB40A   | 0.271  | 0.297 | 0.913  | 0.361 | 1.311 | 0.389 | 0.8    | 0.424 | 0.733 | 2.346 |
| RAB3IL1  | -0.102 | 0.296 | -0.346 | 0.73  | 0.903 | 0.267 | -0.364 | 0.716 | 0.505 | 1.613 |
| RAB3GAP2 | 0.416  | 0.303 | 1.375  | 0.169 | 1.516 | 0.459 | 1.125  | 0.261 | 0.838 | 2.743 |
| RAB3GAP1 | 0.065  | 0.297 | 0.22   | 0.826 | 1.068 | 0.317 | 0.213  | 0.831 | 0.596 | 1.912 |
| RAB3D    | -0.113 | 0.296 | -0.381 | 0.703 | 0.893 | 0.265 | -0.404 | 0.687 | 0.5   | 1.597 |
| RAB3B    | 0.167  | 0.296 | 0.565  | 0.572 | 1.182 | 0.35  | 0.52   | 0.603 | 0.661 | 2.114 |
| RAB3A    | -0.04  | 0.298 | -0.136 | 0.892 | 0.96  | 0.286 | -0.139 | 0.89  | 0.536 | 1.721 |
| RAB38    | 0.386  | 0.297 | 1.298  | 0.194 | 1.471 | 0.437 | 1.077  | 0.282 | 0.821 | 2.634 |
| RAB36    | -0.356 | 0.3   | -1.189 | 0.234 | 0.7   | 0.21  | -1.429 | 0.153 | 0.389 | 1.26  |
| RAB35    | -0.013 | 0.297 | -0.042 | 0.966 | 0.987 | 0.293 | -0.043 | 0.966 | 0.552 | 1.767 |
| RAB33B   | -0.743 | 0.308 | -2.41  | 0.016 | 0.476 | 0.147 | -3.574 | 0     | 0.26  | 0.871 |
| RAB33A   | -0.327 | 0.3   | -1.092 | 0.275 | 0.721 | 0.216 | -1.293 | 0.196 | 0.401 | 1.297 |
| RAB32    | 0.069  | 0.295 | 0.233  | 0.816 | 1.071 | 0.316 | 0.225  | 0.822 | 0.601 | 1.911 |
| RAB31    | -0.619 | 0.31  | -1.999 | 0.046 | 0.538 | 0.167 | -2.768 | 0.006 | 0.293 | 0.988 |
| RAB30    | -0.265 | 0.298 | -0.892 | 0.372 | 0.767 | 0.228 | -1.022 | 0.307 | 0.428 | 1.374 |
| RAB2A    | -0.078 | 0.296 | -0.264 | 0.792 | 0.925 | 0.273 | -0.275 | 0.783 | 0.518 | 1.651 |
| RAB29    | 0.306  | 0.3   | 1.02   | 0.308 | 1.358 | 0.407 | 0.879  | 0.38  | 0.754 | 2.444 |
| RAB28    | 0.139  | 0.296 | 0.471  | 0.638 | 1.15  | 0.34  | 0.439  | 0.66  | 0.643 | 2.054 |
| RAB27B   | -0.34  | 0.3   | -1.132 | 0.258 | 0.712 | 0.214 | -1.348 | 0.178 | 0.395 | 1.282 |
| RAB27A   | -0.381 | 0.3   | -1.273 | 0.203 | 0.683 | 0.205 | -1.549 | 0.121 | 0.379 | 1.229 |
| RAB26    | 0.186  | 0.296 | 0.629  | 0.529 | 1.205 | 0.357 | 0.574  | 0.566 | 0.674 | 2.152 |
| RAB25    | -0.34  | 0.303 | -1.121 | 0.262 | 0.712 | 0.216 | -1.335 | 0.182 | 0.393 | 1.29  |
| RAB23    | -0.483 | 0.302 | -1.598 | 0.11  | 0.617 | 0.187 | -2.054 | 0.04  | 0.341 | 1.116 |
| RAB22A   | 0.342  | 0.298 | 1.149  | 0.25  | 1.408 | 0.419 | 0.973  | 0.33  | 0.786 | 2.524 |
| RAB21    | -0.278 | 0.304 | -0.915 | 0.36  | 0.757 | 0.23  | -1.055 | 0.292 | 0.418 | 1.374 |
| RAB20    | 0.044  | 0.295 | 0.148  | 0.882 | 1.045 | 0.309 | 0.145  | 0.885 | 0.586 | 1.864 |
| RAB1B    | 0.059  | 0.295 | 0.201  | 0.84  | 1.061 | 0.313 | 0.195  | 0.845 | 0.595 | 1.893 |
| RAB1A    | -0.014 | 0.297 | -0.049 | 0.961 | 0.986 | 0.293 | -0.049 | 0.961 | 0.551 | 1.764 |



|           |        |       |        |       |       |       |        |       |       |       |
|-----------|--------|-------|--------|-------|-------|-------|--------|-------|-------|-------|
| RAB17     | -0.338 | 0.299 | -1.131 | 0.258 | 0.713 | 0.213 | -1.345 | 0.179 | 0.397 | 1.281 |
| RAB15     | 0.298  | 0.298 | 1.003  | 0.316 | 1.348 | 0.401 | 0.867  | 0.386 | 0.752 | 2.414 |
| RAB14     | -0.769 | 0.315 | -2.446 | 0.014 | 0.463 | 0.146 | -3.682 | 0     | 0.25  | 0.858 |
| RAB13     | -0.192 | 0.298 | -0.643 | 0.52  | 0.826 | 0.246 | -0.709 | 0.478 | 0.461 | 1.48  |
| RAB11FIP5 | 0.148  | 0.297 | 0.498  | 0.619 | 1.159 | 0.344 | 0.463  | 0.643 | 0.648 | 2.076 |
| RAB11FIP4 | 0.203  | 0.296 | 0.685  | 0.494 | 1.225 | 0.363 | 0.62   | 0.535 | 0.685 | 2.189 |
| RAB11FIP3 | -0.336 | 0.298 | -1.127 | 0.26  | 0.715 | 0.213 | -1.339 | 0.18  | 0.399 | 1.282 |
| RAB11FIP2 | -0.491 | 0.302 | -1.625 | 0.104 | 0.612 | 0.185 | -2.099 | 0.036 | 0.338 | 1.106 |
| RAB11FIP1 | -0.968 | 0.329 | -2.945 | 0.003 | 0.38  | 0.125 | -4.967 | 0     | 0.199 | 0.723 |
| RAB11B    | 0.226  | 0.296 | 0.763  | 0.445 | 1.254 | 0.372 | 0.683  | 0.494 | 0.701 | 2.242 |
| RAB11A    | -0.039 | 0.299 | -0.129 | 0.897 | 0.962 | 0.288 | -0.132 | 0.895 | 0.535 | 1.729 |
| R3HDM4    | -0.326 | 0.298 | -1.093 | 0.275 | 0.722 | 0.215 | -1.291 | 0.197 | 0.403 | 1.295 |
| R3HDM2    | -0.5   | 0.303 | -1.652 | 0.099 | 0.607 | 0.184 | -2.143 | 0.032 | 0.335 | 1.098 |
| R3HDM1    | 0.296  | 0.298 | 0.993  | 0.321 | 1.344 | 0.4   | 0.859  | 0.39  | 0.75  | 2.409 |
| R3HCC1L   | -0.038 | 0.295 | -0.13  | 0.897 | 0.962 | 0.284 | -0.132 | 0.895 | 0.54  | 1.716 |
| R3HCC1    | 0.223  | 0.296 | 0.753  | 0.451 | 1.25  | 0.37  | 0.675  | 0.5   | 0.7   | 2.232 |
| QTRT2     | 0.52   | 0.3   | 1.734  | 0.083 | 1.682 | 0.504 | 1.352  | 0.176 | 0.934 | 3.028 |
| QTRT1     | -0.116 | 0.298 | -0.389 | 0.697 | 0.89  | 0.266 | -0.412 | 0.68  | 0.496 | 1.598 |
| QSOX1     | -0.321 | 0.3   | -1.069 | 0.285 | 0.726 | 0.218 | -1.261 | 0.207 | 0.403 | 1.306 |
| QSER1     | 0.138  | 0.296 | 0.465  | 0.642 | 1.147 | 0.339 | 0.435  | 0.664 | 0.643 | 2.048 |
| QRSL1     | -0.356 | 0.299 | -1.193 | 0.233 | 0.7   | 0.209 | -1.434 | 0.152 | 0.39  | 1.257 |
| QRICH1    | 0.254  | 0.298 | 0.854  | 0.393 | 1.289 | 0.384 | 0.754  | 0.451 | 0.72  | 2.31  |
| QPRT      | 0.815  | 0.315 | 2.588  | 0.01  | 2.258 | 0.711 | 1.77   | 0.077 | 1.219 | 4.185 |
| QPCTL     | -0.06  | 0.295 | -0.204 | 0.839 | 0.942 | 0.278 | -0.21  | 0.834 | 0.528 | 1.68  |
| QPCT      | -0.06  | 0.296 | -0.204 | 0.838 | 0.941 | 0.278 | -0.21  | 0.833 | 0.527 | 1.681 |
| QKI       | -0.029 | 0.297 | -0.099 | 0.921 | 0.971 | 0.288 | -0.101 | 0.92  | 0.543 | 1.738 |
| QDPR      | -0.788 | 0.321 | -2.452 | 0.014 | 0.455 | 0.146 | -3.729 | 0     | 0.242 | 0.854 |
| PZP       | 0.527  | 0.306 | 1.724  | 0.085 | 1.694 | 0.518 | 1.34   | 0.18  | 0.93  | 3.084 |
| PYY2      | 0.621  | 0.304 | 2.045  | 0.041 | 1.862 | 0.566 | 1.523  | 0.128 | 1.026 | 3.377 |
| PYY       | 0.181  | 0.296 | 0.611  | 0.541 | 1.198 | 0.355 | 0.559  | 0.576 | 0.671 | 2.142 |
| PYROXD1   | -0.774 | 0.315 | -2.457 | 0.014 | 0.461 | 0.145 | -3.71  | 0     | 0.249 | 0.855 |
| PYHIN1    | 0.063  | 0.297 | 0.212  | 0.832 | 1.065 | 0.317 | 0.206  | 0.837 | 0.595 | 1.908 |
| PYGO1     | -0.457 | 0.301 | -1.52  | 0.128 | 0.633 | 0.19  | -1.927 | 0.054 | 0.351 | 1.141 |
| PYGM      | -0.563 | 0.303 | -1.859 | 0.063 | 0.57  | 0.172 | -2.496 | 0.013 | 0.315 | 1.031 |
| PYGL      | -0.775 | 0.315 | -2.464 | 0.014 | 0.461 | 0.145 | -3.723 | 0     | 0.249 | 0.853 |
| PYGB      | 0.275  | 0.297 | 0.925  | 0.355 | 1.316 | 0.391 | 0.809  | 0.419 | 0.735 | 2.355 |
| PYCR3     | 0.012  | 0.296 | 0.04   | 0.968 | 1.012 | 0.299 | 0.04   | 0.968 | 0.567 | 1.807 |
| PYCR1     | 0.282  | 0.298 | 0.946  | 0.344 | 1.325 | 0.394 | 0.825  | 0.41  | 0.74  | 2.374 |

|         |        |       |        |       |       |       |        |       |       |       |
|---------|--------|-------|--------|-------|-------|-------|--------|-------|-------|-------|
| PYCARD  | 0.266  | 0.297 | 0.898  | 0.369 | 1.305 | 0.387 | 0.788  | 0.431 | 0.73  | 2.335 |
| PXN     | -0.173 | 0.297 | -0.584 | 0.559 | 0.841 | 0.25  | -0.638 | 0.523 | 0.47  | 1.504 |
| PXMP4   | -0.346 | 0.297 | -1.165 | 0.244 | 0.708 | 0.21  | -1.392 | 0.164 | 0.395 | 1.266 |
| PXMP2   | 1.094  | 0.321 | 3.403  | 0.001 | 2.986 | 0.96  | 2.069  | 0.039 | 1.59  | 5.608 |
| PXDN    | 0.167  | 0.298 | 0.561  | 0.575 | 1.182 | 0.352 | 0.517  | 0.605 | 0.659 | 2.119 |
| PXDC1   | -0.026 | 0.296 | -0.089 | 0.929 | 0.974 | 0.288 | -0.09  | 0.928 | 0.546 | 1.738 |
| PWWP3A  | -0.28  | 0.298 | -0.939 | 0.348 | 0.756 | 0.225 | -1.084 | 0.279 | 0.422 | 1.355 |
| PWWP2A  | -0.338 | 0.3   | -1.125 | 0.26  | 0.713 | 0.214 | -1.339 | 0.181 | 0.396 | 1.285 |
| PWP2    | 0.432  | 0.3   | 1.443  | 0.149 | 1.541 | 0.462 | 1.171  | 0.241 | 0.856 | 2.772 |
| PWP1    | 0.329  | 0.298 | 1.104  | 0.27  | 1.389 | 0.414 | 0.94   | 0.347 | 0.775 | 2.492 |
| PWAR5   | 0.569  | 0.306 | 1.862  | 0.063 | 1.766 | 0.54  | 1.42   | 0.156 | 0.97  | 3.215 |
| PVT1    | 0.257  | 0.297 | 0.868  | 0.386 | 1.293 | 0.384 | 0.765  | 0.444 | 0.723 | 2.313 |
| PVRIG   | -0.976 | 0.321 | -3.037 | 0.002 | 0.377 | 0.121 | -5.146 | 0     | 0.201 | 0.707 |
| PVR     | 0.026  | 0.296 | 0.087  | 0.93  | 1.026 | 0.304 | 0.086  | 0.931 | 0.575 | 1.832 |
| PVALB   | -0.052 | 0.295 | -0.176 | 0.86  | 0.949 | 0.28  | -0.181 | 0.857 | 0.532 | 1.694 |
| PUS7L   | -0.09  | 0.295 | -0.303 | 0.762 | 0.914 | 0.27  | -0.317 | 0.751 | 0.513 | 1.631 |
| PUS7    | 0.028  | 0.295 | 0.094  | 0.925 | 1.028 | 0.304 | 0.093  | 0.926 | 0.576 | 1.835 |
| PUS3    | -0.259 | 0.298 | -0.868 | 0.385 | 0.772 | 0.23  | -0.991 | 0.322 | 0.431 | 1.384 |
| PUS1    | -0.205 | 0.297 | -0.691 | 0.489 | 0.815 | 0.242 | -0.767 | 0.443 | 0.455 | 1.457 |
| PURG    | -0.093 | 0.296 | -0.313 | 0.754 | 0.911 | 0.27  | -0.328 | 0.743 | 0.51  | 1.627 |
| PURA    | -0.639 | 0.306 | -2.09  | 0.037 | 0.528 | 0.161 | -2.927 | 0.003 | 0.29  | 0.961 |
| PUM3    | 0.534  | 0.302 | 1.765  | 0.078 | 1.705 | 0.516 | 1.368  | 0.171 | 0.943 | 3.085 |
| PUM2    | -0.065 | 0.296 | -0.221 | 0.825 | 0.937 | 0.277 | -0.228 | 0.82  | 0.525 | 1.672 |
| PUM1    | 0.266  | 0.298 | 0.894  | 0.371 | 1.305 | 0.388 | 0.785  | 0.432 | 0.728 | 2.338 |
| PUF60   | 0.751  | 0.315 | 2.383  | 0.017 | 2.118 | 0.667 | 1.676  | 0.094 | 1.143 | 3.928 |
| PUDP    | -0.216 | 0.298 | -0.726 | 0.468 | 0.806 | 0.24  | -0.81  | 0.418 | 0.45  | 1.444 |
| PTX3    | 0.324  | 0.3   | 1.082  | 0.279 | 1.383 | 0.415 | 0.924  | 0.355 | 0.769 | 2.49  |
| PTTG3P  | 0.676  | 0.306 | 2.209  | 0.027 | 1.965 | 0.601 | 1.606  | 0.108 | 1.079 | 3.579 |
| PTTG2   | -0.094 | 0.295 | -0.318 | 0.751 | 0.91  | 0.269 | -0.333 | 0.739 | 0.51  | 1.624 |
| PTTG1IP | 0.347  | 0.298 | 1.165  | 0.244 | 1.414 | 0.421 | 0.984  | 0.325 | 0.789 | 2.535 |
| PTTG1   | 0.609  | 0.306 | 1.994  | 0.046 | 1.839 | 0.562 | 1.493  | 0.135 | 1.01  | 3.348 |
| PTS     | 0.095  | 0.295 | 0.32   | 0.749 | 1.099 | 0.325 | 0.306  | 0.76  | 0.616 | 1.961 |
| PTRH2   | 0.157  | 0.297 | 0.527  | 0.598 | 1.169 | 0.347 | 0.488  | 0.626 | 0.653 | 2.094 |
| PTPRZ1  | -0.063 | 0.295 | -0.213 | 0.832 | 0.939 | 0.277 | -0.22  | 0.826 | 0.527 | 1.675 |
| PTPRU   | 0.321  | 0.304 | 1.057  | 0.291 | 1.378 | 0.419 | 0.904  | 0.366 | 0.76  | 2.5   |
| PTPRT   | -0.226 | 0.298 | -0.757 | 0.449 | 0.798 | 0.238 | -0.85  | 0.396 | 0.445 | 1.431 |
| PTPRS   | 0.396  | 0.3   | 1.32   | 0.187 | 1.485 | 0.445 | 1.09   | 0.276 | 0.825 | 2.674 |
| PTPRR   | -0.371 | 0.302 | -1.227 | 0.22  | 0.69  | 0.209 | -1.486 | 0.137 | 0.382 | 1.248 |

|           |        |       |        |       |       |       |        |       |       |       |
|-----------|--------|-------|--------|-------|-------|-------|--------|-------|-------|-------|
| PTPRO     | 0.009  | 0.297 | 0.03   | 0.976 | 1.009 | 0.3   | 0.03   | 0.976 | 0.564 | 1.806 |
| PTPRN2    | -0.166 | 0.299 | -0.554 | 0.579 | 0.847 | 0.253 | -0.603 | 0.547 | 0.472 | 1.522 |
| PTPRN     | 0.319  | 0.3   | 1.063  | 0.288 | 1.376 | 0.412 | 0.911  | 0.363 | 0.764 | 2.476 |
| PTPRM     | -0.714 | 0.306 | -2.332 | 0.02  | 0.49  | 0.15  | -3.403 | 0.001 | 0.269 | 0.892 |
| PTPRK     | -0.12  | 0.296 | -0.406 | 0.685 | 0.887 | 0.263 | -0.431 | 0.666 | 0.496 | 1.585 |
| PTPRJ     | 0.15   | 0.295 | 0.509  | 0.61  | 1.162 | 0.343 | 0.473  | 0.636 | 0.652 | 2.073 |
| PTPRH     | 0.112  | 0.295 | 0.381  | 0.703 | 1.119 | 0.33  | 0.36   | 0.719 | 0.627 | 1.996 |
| PTPRG     | -0.411 | 0.302 | -1.361 | 0.174 | 0.663 | 0.2   | -1.683 | 0.092 | 0.366 | 1.199 |
| PTPRF     | 0.089  | 0.295 | 0.302  | 0.762 | 1.093 | 0.323 | 0.289  | 0.772 | 0.613 | 1.95  |
| PTPRE     | -0.776 | 0.311 | -2.5   | 0.012 | 0.46  | 0.143 | -3.779 | 0     | 0.25  | 0.846 |
| PTPRD     | -0.487 | 0.302 | -1.61  | 0.107 | 0.615 | 0.186 | -2.073 | 0.038 | 0.34  | 1.112 |
| PTPRCAP   | -0.327 | 0.297 | -1.101 | 0.271 | 0.721 | 0.214 | -1.303 | 0.193 | 0.403 | 1.291 |
| PTPRC     | -0.281 | 0.296 | -0.949 | 0.342 | 0.755 | 0.224 | -1.096 | 0.273 | 0.422 | 1.349 |
| PTPRB     | -0.8   | 0.315 | -2.541 | 0.011 | 0.45  | 0.141 | -3.892 | 0     | 0.243 | 0.833 |
| PTPRA     | -0.439 | 0.3   | -1.465 | 0.143 | 0.645 | 0.193 | -1.839 | 0.066 | 0.358 | 1.16  |
| PTPN9     | -0.001 | 0.296 | -0.002 | 0.998 | 0.999 | 0.295 | -0.002 | 0.998 | 0.56  | 1.783 |
| PTPN7     | 0.482  | 0.302 | 1.593  | 0.111 | 1.619 | 0.49  | 1.264  | 0.206 | 0.895 | 2.929 |
| PTPN6     | -0.475 | 0.302 | -1.572 | 0.116 | 0.622 | 0.188 | -2.013 | 0.044 | 0.344 | 1.124 |
| PTPN4     | 0.442  | 0.3   | 1.476  | 0.14  | 1.556 | 0.466 | 1.193  | 0.233 | 0.865 | 2.798 |
| PTPN3     | -0.597 | 0.306 | -1.951 | 0.051 | 0.551 | 0.168 | -2.669 | 0.008 | 0.302 | 1.003 |
| PTPN22    | -0.465 | 0.3   | -1.55  | 0.121 | 0.628 | 0.188 | -1.973 | 0.048 | 0.349 | 1.131 |
| PTPN21    | 0.145  | 0.296 | 0.49   | 0.624 | 1.156 | 0.342 | 0.456  | 0.649 | 0.647 | 2.065 |
| PTPN20    | 0.084  | 0.295 | 0.283  | 0.777 | 1.087 | 0.321 | 0.272  | 0.786 | 0.609 | 1.94  |
| PTPN2     | 0.385  | 0.301 | 1.278  | 0.201 | 1.469 | 0.442 | 1.061  | 0.289 | 0.814 | 2.65  |
| PTPN18    | 0.013  | 0.296 | 0.043  | 0.966 | 1.013 | 0.3   | 0.042  | 0.966 | 0.567 | 1.81  |
| PTPN14    | 0.363  | 0.302 | 1.202  | 0.23  | 1.438 | 0.435 | 1.008  | 0.314 | 0.795 | 2.601 |
| PTPN13    | -0.304 | 0.298 | -1.021 | 0.307 | 0.738 | 0.22  | -1.193 | 0.233 | 0.412 | 1.323 |
| PTPN12    | -0.044 | 0.295 | -0.149 | 0.881 | 0.957 | 0.283 | -0.153 | 0.879 | 0.536 | 1.707 |
| PTPN11    | 0.041  | 0.296 | 0.138  | 0.89  | 1.042 | 0.308 | 0.135  | 0.892 | 0.583 | 1.86  |
| PTPN1     | 0.155  | 0.295 | 0.524  | 0.6   | 1.168 | 0.345 | 0.486  | 0.627 | 0.654 | 2.083 |
| PTPA      | -0.061 | 0.296 | -0.205 | 0.837 | 0.941 | 0.278 | -0.212 | 0.832 | 0.527 | 1.68  |
| PTP4A3    | -0.053 | 0.295 | -0.18  | 0.857 | 0.948 | 0.28  | -0.185 | 0.853 | 0.531 | 1.691 |
| PTP4A2    | -0.322 | 0.298 | -1.078 | 0.281 | 0.725 | 0.216 | -1.271 | 0.204 | 0.404 | 1.301 |
| PTP4A1    | 0.093  | 0.295 | 0.314  | 0.753 | 1.097 | 0.324 | 0.3    | 0.764 | 0.615 | 1.957 |
| PTOV1-AS2 | 0.038  | 0.295 | 0.128  | 0.898 | 1.038 | 0.307 | 0.125  | 0.9   | 0.582 | 1.852 |
| PTOV1     | -0.086 | 0.297 | -0.29  | 0.772 | 0.918 | 0.272 | -0.303 | 0.762 | 0.513 | 1.642 |
| PTN       | 0.098  | 0.295 | 0.332  | 0.74  | 1.103 | 0.326 | 0.316  | 0.752 | 0.618 | 1.968 |
| PTMS      | 0.158  | 0.296 | 0.534  | 0.593 | 1.171 | 0.347 | 0.494  | 0.621 | 0.656 | 2.093 |

|              |        |       |        |       |       |       |        |       |       |       |
|--------------|--------|-------|--------|-------|-------|-------|--------|-------|-------|-------|
| PTMA         | -0.109 | 0.296 | -0.369 | 0.712 | 0.896 | 0.266 | -0.39  | 0.696 | 0.502 | 1.602 |
| PTK7         | -0.118 | 0.296 | -0.399 | 0.69  | 0.889 | 0.263 | -0.424 | 0.672 | 0.498 | 1.586 |
| PTK6         | 0.07   | 0.295 | 0.239  | 0.811 | 1.073 | 0.317 | 0.23   | 0.818 | 0.602 | 1.913 |
| PTK2B        | -0.201 | 0.299 | -0.673 | 0.501 | 0.818 | 0.244 | -0.745 | 0.456 | 0.456 | 1.469 |
| PTK2         | 0.706  | 0.31  | 2.279  | 0.023 | 2.025 | 0.627 | 1.635  | 0.102 | 1.104 | 3.715 |
| PTHLH        | -0.922 | 0.321 | -2.87  | 0.004 | 0.398 | 0.128 | -4.713 | 0     | 0.212 | 0.747 |
| PTH2R        | -0.243 | 0.296 | -0.82  | 0.412 | 0.784 | 0.232 | -0.928 | 0.354 | 0.439 | 1.402 |
| PTH1R        | -0.589 | 0.306 | -1.927 | 0.054 | 0.555 | 0.17  | -2.624 | 0.009 | 0.305 | 1.01  |
| PTH          | 0.091  | 0.296 | 0.309  | 0.758 | 1.096 | 0.324 | 0.295  | 0.768 | 0.614 | 1.955 |
| PTGS2        | -0.173 | 0.296 | -0.583 | 0.56  | 0.841 | 0.249 | -0.637 | 0.524 | 0.471 | 1.503 |
| PTGS1        | -0.498 | 0.302 | -1.646 | 0.1   | 0.608 | 0.184 | -2.133 | 0.033 | 0.336 | 1.1   |
| PTGIS        | -0.691 | 0.306 | -2.257 | 0.024 | 0.501 | 0.153 | -3.252 | 0.001 | 0.275 | 0.913 |
| PTGIR        | -0.164 | 0.296 | -0.552 | 0.581 | 0.849 | 0.252 | -0.6   | 0.548 | 0.475 | 1.518 |
| PTGFR        | -0.256 | 0.296 | -0.863 | 0.388 | 0.774 | 0.229 | -0.983 | 0.326 | 0.433 | 1.384 |
| PTGES3       | -0.228 | 0.296 | -0.767 | 0.443 | 0.797 | 0.236 | -0.862 | 0.389 | 0.446 | 1.424 |
| PTGES2       | -0.14  | 0.296 | -0.473 | 0.636 | 0.869 | 0.257 | -0.508 | 0.611 | 0.486 | 1.553 |
| PTGES        | 0.146  | 0.296 | 0.495  | 0.62  | 1.158 | 0.342 | 0.461  | 0.645 | 0.649 | 2.066 |
| PTGER4P2-CDK | -0.195 | 0.297 | -0.655 | 0.512 | 0.823 | 0.245 | -0.723 | 0.47  | 0.46  | 1.474 |
| PTGER4       | -0.32  | 0.297 | -1.075 | 0.282 | 0.727 | 0.216 | -1.267 | 0.205 | 0.406 | 1.301 |
| PTGER3       | -0.214 | 0.298 | -0.719 | 0.472 | 0.807 | 0.241 | -0.801 | 0.423 | 0.45  | 1.448 |
| PTGER2       | -0.034 | 0.296 | -0.115 | 0.909 | 0.967 | 0.286 | -0.117 | 0.907 | 0.541 | 1.726 |
| PTGER1       | 0.023  | 0.296 | 0.078  | 0.938 | 1.023 | 0.302 | 0.077  | 0.938 | 0.573 | 1.827 |
| PTGDS        | -0.607 | 0.304 | -1.999 | 0.046 | 0.545 | 0.165 | -2.751 | 0.006 | 0.3   | 0.988 |
| PTGDR2       | -0.469 | 0.299 | -1.568 | 0.117 | 0.626 | 0.187 | -2.001 | 0.045 | 0.348 | 1.124 |
| PTGDR        | 0.237  | 0.296 | 0.801  | 0.423 | 1.268 | 0.376 | 0.713  | 0.476 | 0.709 | 2.267 |
| PTER         | -0.359 | 0.307 | -1.17  | 0.242 | 0.698 | 0.214 | -1.408 | 0.159 | 0.383 | 1.274 |
| PTENP1       | 0.069  | 0.297 | 0.232  | 0.817 | 1.071 | 0.318 | 0.224  | 0.823 | 0.599 | 1.916 |
| PTEN         | 0.259  | 0.297 | 0.871  | 0.384 | 1.296 | 0.385 | 0.767  | 0.443 | 0.723 | 2.321 |
| PTDSS2       | -0.126 | 0.297 | -0.425 | 0.671 | 0.882 | 0.261 | -0.452 | 0.651 | 0.493 | 1.577 |
| PTDSS1       | 0.338  | 0.3   | 1.127  | 0.26  | 1.402 | 0.421 | 0.957  | 0.339 | 0.779 | 2.524 |
| PTCRA        | 0.092  | 0.299 | 0.306  | 0.759 | 1.096 | 0.328 | 0.293  | 0.77  | 0.61  | 1.971 |
| PTCH2        | 0.252  | 0.298 | 0.844  | 0.398 | 1.286 | 0.384 | 0.747  | 0.455 | 0.717 | 2.307 |
| PTCH1        | -0.007 | 0.296 | -0.025 | 0.98  | 0.993 | 0.294 | -0.025 | 0.98  | 0.556 | 1.774 |
| PTCD3        | 0.1    | 0.297 | 0.337  | 0.736 | 1.105 | 0.329 | 0.32   | 0.749 | 0.617 | 1.98  |
| PTCD2        | 0.155  | 0.296 | 0.523  | 0.601 | 1.167 | 0.345 | 0.484  | 0.628 | 0.654 | 2.084 |
| PTBP3        | 0.415  | 0.298 | 1.392  | 0.164 | 1.514 | 0.451 | 1.14   | 0.254 | 0.845 | 2.713 |
| PTBP2        | 0.355  | 0.3   | 1.185  | 0.236 | 1.426 | 0.427 | 0.998  | 0.318 | 0.793 | 2.566 |
| PTBP1        | 0.016  | 0.295 | 0.054  | 0.957 | 1.016 | 0.3   | 0.054  | 0.957 | 0.57  | 1.811 |

|          |        |       |        |       |       |       |        |       |       |       |
|----------|--------|-------|--------|-------|-------|-------|--------|-------|-------|-------|
| PTAFR    | -0.558 | 0.302 | -1.849 | 0.064 | 0.572 | 0.173 | -2.477 | 0.013 | 0.317 | 1.034 |
| PSTPIP2  | 0.27   | 0.296 | 0.913  | 0.361 | 1.31  | 0.388 | 0.8    | 0.424 | 0.733 | 2.341 |
| PSTPIP1  | -0.25  | 0.298 | -0.837 | 0.403 | 0.779 | 0.232 | -0.95  | 0.342 | 0.434 | 1.398 |
| PSRC1    | 0.307  | 0.298 | 1.03   | 0.303 | 1.359 | 0.405 | 0.887  | 0.375 | 0.758 | 2.437 |
| PSPN     | 0.173  | 0.298 | 0.58   | 0.562 | 1.189 | 0.354 | 0.532  | 0.594 | 0.663 | 2.133 |
| PSPH     | 0.382  | 0.3   | 1.275  | 0.202 | 1.465 | 0.439 | 1.06   | 0.289 | 0.814 | 2.635 |
| PSPC1    | 0.766  | 0.31  | 2.47   | 0.014 | 2.152 | 0.667 | 1.726  | 0.084 | 1.171 | 3.951 |
| PSORS1C2 | 0.438  | 0.302 | 1.45   | 0.147 | 1.55  | 0.469 | 1.174  | 0.24  | 0.857 | 2.803 |
| PSORS1C1 | -0.121 | 0.298 | -0.405 | 0.686 | 0.886 | 0.264 | -0.43  | 0.667 | 0.494 | 1.59  |
| PSMG2    | 0.146  | 0.298 | 0.491  | 0.623 | 1.158 | 0.345 | 0.457  | 0.648 | 0.645 | 2.076 |
| PSMG1    | 0.746  | 0.31  | 2.406  | 0.016 | 2.108 | 0.653 | 1.696  | 0.09  | 1.148 | 3.869 |
| PSMF1    | 0.16   | 0.296 | 0.539  | 0.59  | 1.173 | 0.347 | 0.499  | 0.618 | 0.657 | 2.095 |
| PSME4    | 0.4    | 0.3   | 1.333  | 0.182 | 1.492 | 0.448 | 1.099  | 0.272 | 0.829 | 2.686 |
| PSME3IP1 | 0.428  | 0.3   | 1.427  | 0.154 | 1.535 | 0.461 | 1.161  | 0.246 | 0.852 | 2.764 |
| PSME3    | 0.133  | 0.296 | 0.449  | 0.654 | 1.142 | 0.339 | 0.42   | 0.674 | 0.639 | 2.042 |
| PSME1    | 0.28   | 0.298 | 0.94   | 0.347 | 1.323 | 0.394 | 0.82   | 0.412 | 0.738 | 2.371 |
| PSMD9    | 0.153  | 0.295 | 0.519  | 0.604 | 1.166 | 0.344 | 0.481  | 0.631 | 0.653 | 2.08  |
| PSMD8    | 0.205  | 0.297 | 0.692  | 0.489 | 1.228 | 0.365 | 0.625  | 0.532 | 0.686 | 2.199 |
| PSMD7    | 0.71   | 0.306 | 2.32   | 0.02  | 2.034 | 0.623 | 1.661  | 0.097 | 1.116 | 3.707 |
| PSMD6    | -0.108 | 0.296 | -0.365 | 0.715 | 0.897 | 0.266 | -0.386 | 0.7   | 0.502 | 1.604 |
| PSMD5    | -0.105 | 0.297 | -0.353 | 0.724 | 0.901 | 0.267 | -0.372 | 0.71  | 0.503 | 1.611 |
| PSMD4    | 0.343  | 0.296 | 1.157  | 0.247 | 1.409 | 0.418 | 0.979  | 0.327 | 0.788 | 2.519 |
| PSMD3    | 0.28   | 0.296 | 0.946  | 0.344 | 1.323 | 0.392 | 0.825  | 0.409 | 0.741 | 2.365 |
| PSMD2    | 1.019  | 0.321 | 3.176  | 0.001 | 2.771 | 0.889 | 1.992  | 0.046 | 1.477 | 5.197 |
| PSMD14   | 0.585  | 0.306 | 1.914  | 0.056 | 1.795 | 0.549 | 1.449  | 0.147 | 0.986 | 3.269 |
| PSMD13   | 0.709  | 0.306 | 2.315  | 0.021 | 2.031 | 0.622 | 1.659  | 0.097 | 1.115 | 3.701 |
| PSMD12   | 0.93   | 0.321 | 2.901  | 0.004 | 2.535 | 0.813 | 1.889  | 0.059 | 1.352 | 4.753 |
| PSMD11   | 0.152  | 0.296 | 0.511  | 0.609 | 1.164 | 0.345 | 0.475  | 0.635 | 0.651 | 2.08  |
| PSMD10   | 0.091  | 0.295 | 0.307  | 0.759 | 1.095 | 0.323 | 0.294  | 0.769 | 0.614 | 1.953 |
| PSMD1    | 0.461  | 0.3   | 1.537  | 0.124 | 1.586 | 0.476 | 1.232  | 0.218 | 0.881 | 2.855 |
| PSMC6    | 0.85   | 0.309 | 2.752  | 0.006 | 2.339 | 0.722 | 1.854  | 0.064 | 1.277 | 4.284 |
| PSMC5    | 0.28   | 0.296 | 0.945  | 0.345 | 1.323 | 0.392 | 0.824  | 0.41  | 0.74  | 2.366 |
| PSMC4    | 0.198  | 0.296 | 0.669  | 0.504 | 1.219 | 0.361 | 0.607  | 0.544 | 0.682 | 2.177 |
| PSMC3IP  | 0.431  | 0.303 | 1.42   | 0.156 | 1.539 | 0.467 | 1.154  | 0.249 | 0.849 | 2.789 |
| PSMC3    | 0.346  | 0.298 | 1.161  | 0.246 | 1.414 | 0.421 | 0.982  | 0.326 | 0.788 | 2.536 |
| PSMC2    | 0.541  | 0.302 | 1.788  | 0.074 | 1.717 | 0.519 | 1.381  | 0.167 | 0.949 | 3.106 |
| PSMC1    | 0.79   | 0.311 | 2.545  | 0.011 | 2.204 | 0.684 | 1.759  | 0.079 | 1.199 | 4.051 |
| PSMB9    | 0.108  | 0.296 | 0.365  | 0.715 | 1.114 | 0.329 | 0.346  | 0.729 | 0.624 | 1.989 |

|        |        |       |        |       |       |       |        |       |       |       |
|--------|--------|-------|--------|-------|-------|-------|--------|-------|-------|-------|
| PSMB8  | -0.097 | 0.296 | -0.327 | 0.744 | 0.908 | 0.268 | -0.343 | 0.731 | 0.509 | 1.62  |
| PSMB7  | 0.808  | 0.31  | 2.602  | 0.009 | 2.243 | 0.696 | 1.785  | 0.074 | 1.221 | 4.12  |
| PSMB6  | 0.46   | 0.298 | 1.545  | 0.122 | 1.585 | 0.473 | 1.238  | 0.216 | 0.884 | 2.843 |
| PSMB5  | 0.442  | 0.298 | 1.483  | 0.138 | 1.556 | 0.464 | 1.199  | 0.231 | 0.868 | 2.79  |
| PSMB4  | 0.225  | 0.296 | 0.759  | 0.448 | 1.252 | 0.371 | 0.68   | 0.497 | 0.701 | 2.237 |
| PSMB3  | 0.83   | 0.31  | 2.676  | 0.007 | 2.293 | 0.711 | 1.819  | 0.069 | 1.249 | 4.21  |
| PSMB2  | 0.942  | 0.316 | 2.983  | 0.003 | 2.566 | 0.81  | 1.932  | 0.053 | 1.381 | 4.765 |
| PSMB10 | -0.225 | 0.298 | -0.754 | 0.451 | 0.799 | 0.238 | -0.845 | 0.398 | 0.445 | 1.433 |
| PSMB1  | 0.16   | 0.296 | 0.539  | 0.59  | 1.173 | 0.348 | 0.498  | 0.619 | 0.656 | 2.097 |
| PSMA7  | 1.399  | 0.346 | 4.044  | 0     | 4.053 | 1.402 | 2.177  | 0.03  | 2.057 | 7.985 |
| PSMA5  | 0.464  | 0.3   | 1.547  | 0.122 | 1.59  | 0.476 | 1.238  | 0.216 | 0.884 | 2.861 |
| PSMA4  | 0.703  | 0.31  | 2.269  | 0.023 | 2.02  | 0.626 | 1.63   | 0.103 | 1.1   | 3.706 |
| PSMA3  | 0.268  | 0.296 | 0.907  | 0.364 | 1.307 | 0.386 | 0.796  | 0.426 | 0.733 | 2.333 |
| PSMA2  | 0.731  | 0.306 | 2.387  | 0.017 | 2.076 | 0.635 | 1.694  | 0.09  | 1.14  | 3.782 |
| PSMA1  | 1.237  | 0.329 | 3.761  | 0     | 3.445 | 1.133 | 2.158  | 0.031 | 1.808 | 6.563 |
| PSKH1  | 0.53   | 0.302 | 1.758  | 0.079 | 1.7   | 0.513 | 1.364  | 0.173 | 0.941 | 3.071 |
| PSIP1  | 0.269  | 0.298 | 0.903  | 0.366 | 1.308 | 0.389 | 0.792  | 0.428 | 0.73  | 2.344 |
| PSG9   | -0.099 | 0.297 | -0.334 | 0.738 | 0.906 | 0.269 | -0.351 | 0.726 | 0.506 | 1.621 |
| PSG7   | -0.128 | 0.295 | -0.433 | 0.665 | 0.88  | 0.26  | -0.461 | 0.645 | 0.493 | 1.57  |
| PSG6   | 0.027  | 0.296 | 0.09   | 0.928 | 1.027 | 0.304 | 0.089  | 0.929 | 0.575 | 1.836 |
| PSG5   | -0.304 | 0.297 | -1.023 | 0.306 | 0.738 | 0.219 | -1.195 | 0.232 | 0.413 | 1.321 |
| PSG4   | -0.357 | 0.298 | -1.198 | 0.231 | 0.7   | 0.208 | -1.44  | 0.15  | 0.391 | 1.254 |
| PSG3   | 0.712  | 0.31  | 2.296  | 0.022 | 2.037 | 0.632 | 1.643  | 0.1   | 1.11  | 3.74  |
| PSG2   | 0.245  | 0.297 | 0.822  | 0.411 | 1.277 | 0.38  | 0.73   | 0.466 | 0.713 | 2.287 |
| PSG11  | 0.353  | 0.298 | 1.186  | 0.236 | 1.423 | 0.424 | 0.999  | 0.318 | 0.794 | 2.551 |
| PSG1   | 0.261  | 0.298 | 0.877  | 0.381 | 1.298 | 0.386 | 0.772  | 0.44  | 0.725 | 2.326 |
| PSENE1 | 0.531  | 0.301 | 1.767  | 0.077 | 1.701 | 0.511 | 1.371  | 0.17  | 0.944 | 3.066 |
| PSENE2 | 0.228  | 0.296 | 0.769  | 0.442 | 1.256 | 0.372 | 0.688  | 0.491 | 0.703 | 2.243 |
| PSENE1 | -0.105 | 0.3   | -0.351 | 0.726 | 0.9   | 0.27  | -0.37  | 0.711 | 0.5   | 1.62  |
| PSD4   | -0.219 | 0.297 | -0.739 | 0.46  | 0.803 | 0.238 | -0.826 | 0.409 | 0.449 | 1.437 |
| PSD3   | -0.624 | 0.306 | -2.043 | 0.041 | 0.536 | 0.164 | -2.837 | 0.005 | 0.294 | 0.975 |
| PSD    | 0.039  | 0.295 | 0.132  | 0.895 | 1.04  | 0.307 | 0.13   | 0.897 | 0.583 | 1.854 |
| PSCA   | 0.283  | 0.301 | 0.941  | 0.347 | 1.327 | 0.4   | 0.819  | 0.413 | 0.736 | 2.395 |
| PSAT1  | 0.065  | 0.297 | 0.218  | 0.827 | 1.067 | 0.317 | 0.211  | 0.833 | 0.596 | 1.911 |
| PSAP   | 0.018  | 0.295 | 0.063  | 0.95  | 1.019 | 0.301 | 0.062  | 0.951 | 0.571 | 1.817 |
| PRX    | 0.25   | 0.297 | 0.842  | 0.4   | 1.284 | 0.382 | 0.745  | 0.456 | 0.717 | 2.299 |
| PRUNE2 | -0.111 | 0.295 | -0.376 | 0.707 | 0.895 | 0.264 | -0.398 | 0.691 | 0.502 | 1.597 |
| PRUNE1 | 0.006  | 0.295 | 0.019  | 0.985 | 1.006 | 0.297 | 0.019  | 0.985 | 0.564 | 1.794 |

|         |        |       |        |       |       |       |        |       |       |       |
|---------|--------|-------|--------|-------|-------|-------|--------|-------|-------|-------|
| PRTN3   | -0.117 | 0.295 | -0.397 | 0.691 | 0.889 | 0.263 | -0.421 | 0.674 | 0.499 | 1.587 |
| PRSS8   | -0.463 | 0.3   | -1.541 | 0.123 | 0.629 | 0.189 | -1.96  | 0.05  | 0.349 | 1.134 |
| PRSS53  | 0.004  | 0.296 | 0.012  | 0.99  | 1.004 | 0.297 | 0.012  | 0.99  | 0.562 | 1.793 |
| PRSS50  | 0.239  | 0.297 | 0.807  | 0.42  | 1.27  | 0.377 | 0.718  | 0.473 | 0.71  | 2.271 |
| PRSS3P2 | 0.179  | 0.296 | 0.605  | 0.545 | 1.196 | 0.354 | 0.554  | 0.579 | 0.67  | 2.137 |
| PRSS3   | 0.046  | 0.296 | 0.157  | 0.875 | 1.047 | 0.31  | 0.153  | 0.878 | 0.587 | 1.87  |
| PRSS23  | -0.259 | 0.302 | -0.857 | 0.391 | 0.772 | 0.233 | -0.978 | 0.328 | 0.427 | 1.395 |
| PRSS22  | 0.204  | 0.296 | 0.69   | 0.49  | 1.227 | 0.363 | 0.624  | 0.533 | 0.687 | 2.192 |
| PRSS21  | 1.088  | 0.322 | 3.382  | 0.001 | 2.967 | 0.954 | 2.061  | 0.039 | 1.58  | 5.573 |
| PRSS2   | 0.55   | 0.3   | 1.834  | 0.067 | 1.733 | 0.519 | 1.411  | 0.158 | 0.963 | 3.118 |
| PRSS16  | -0.201 | 0.298 | -0.673 | 0.501 | 0.818 | 0.244 | -0.745 | 0.456 | 0.456 | 1.468 |
| PRSS12  | -0.093 | 0.296 | -0.313 | 0.754 | 0.912 | 0.269 | -0.328 | 0.743 | 0.511 | 1.627 |
| PRRX2   | 0.503  | 0.3   | 1.676  | 0.094 | 1.654 | 0.497 | 1.317  | 0.188 | 0.918 | 2.98  |
| PRRX1   | -0.93  | 0.316 | -2.941 | 0.003 | 0.395 | 0.125 | -4.852 | 0     | 0.212 | 0.733 |
| PRRG4   | -0.135 | 0.295 | -0.458 | 0.647 | 0.873 | 0.258 | -0.491 | 0.624 | 0.49  | 1.558 |
| PRRG3   | 0.153  | 0.296 | 0.518  | 0.604 | 1.166 | 0.345 | 0.481  | 0.631 | 0.653 | 2.081 |
| PRRG2   | 0.322  | 0.297 | 1.083  | 0.279 | 1.38  | 0.41  | 0.926  | 0.355 | 0.77  | 2.472 |
| PRRG1   | -0.011 | 0.297 | -0.037 | 0.971 | 0.989 | 0.293 | -0.037 | 0.971 | 0.553 | 1.769 |
| PRRC2C  | 0.141  | 0.3   | 0.469  | 0.639 | 1.151 | 0.345 | 0.438  | 0.662 | 0.64  | 2.071 |
| PRRC2B  | -0.54  | 0.301 | -1.795 | 0.073 | 0.583 | 0.175 | -2.38  | 0.017 | 0.323 | 1.051 |
| PRRC2A  | 0.101  | 0.296 | 0.341  | 0.733 | 1.106 | 0.327 | 0.324  | 0.746 | 0.62  | 1.974 |
| PRRC1   | 0.347  | 0.3   | 1.157  | 0.247 | 1.414 | 0.424 | 0.978  | 0.328 | 0.786 | 2.544 |
| PRR7    | 0.136  | 0.299 | 0.457  | 0.648 | 1.146 | 0.342 | 0.427  | 0.669 | 0.638 | 2.057 |
| PRR5L   | -0.962 | 0.321 | -2.995 | 0.003 | 0.382 | 0.123 | -5.033 | 0     | 0.204 | 0.717 |
| PRR5    | -0.712 | 0.307 | -2.321 | 0.02  | 0.49  | 0.151 | -3.385 | 0.001 | 0.269 | 0.895 |
| PRR36   | 0.286  | 0.299 | 0.959  | 0.337 | 1.332 | 0.398 | 0.834  | 0.404 | 0.742 | 2.391 |
| PRR34   | 0.373  | 0.301 | 1.238  | 0.216 | 1.452 | 0.437 | 1.033  | 0.301 | 0.805 | 2.62  |
| PRR3    | 0.217  | 0.296 | 0.733  | 0.463 | 1.243 | 0.368 | 0.659  | 0.51  | 0.695 | 2.222 |
| PRR16   | -0.499 | 0.302 | -1.651 | 0.099 | 0.607 | 0.184 | -2.141 | 0.032 | 0.336 | 1.098 |
| PRR15L  | 0.434  | 0.3   | 1.449  | 0.147 | 1.544 | 0.462 | 1.176  | 0.24  | 0.858 | 2.777 |
| PRR14L  | 0.129  | 0.297 | 0.433  | 0.665 | 1.138 | 0.338 | 0.407  | 0.684 | 0.635 | 2.038 |
| PRR14   | 0.201  | 0.296 | 0.68   | 0.497 | 1.223 | 0.362 | 0.616  | 0.538 | 0.684 | 2.186 |
| PRR13   | -0.112 | 0.295 | -0.381 | 0.703 | 0.894 | 0.264 | -0.403 | 0.687 | 0.501 | 1.594 |
| PRR11   | 0.36   | 0.3   | 1.203  | 0.229 | 1.434 | 0.43  | 1.01   | 0.313 | 0.797 | 2.58  |
| PRPSAP2 | 0.52   | 0.302 | 1.722  | 0.085 | 1.683 | 0.509 | 1.342  | 0.18  | 0.931 | 3.043 |
| PRPSAP1 | 0.266  | 0.298 | 0.895  | 0.371 | 1.305 | 0.389 | 0.786  | 0.432 | 0.728 | 2.34  |
| PRPS2   | 0.328  | 0.298 | 1.101  | 0.271 | 1.387 | 0.413 | 0.939  | 0.348 | 0.774 | 2.486 |
| PRPS1L1 | 0.679  | 0.306 | 2.22   | 0.026 | 1.971 | 0.603 | 1.612  | 0.107 | 1.083 | 3.589 |

|         |        |       |        |       |       |       |        |       |       |       |
|---------|--------|-------|--------|-------|-------|-------|--------|-------|-------|-------|
| PRPS1   | 0.993  | 0.321 | 3.093  | 0.002 | 2.7   | 0.867 | 1.961  | 0.05  | 1.439 | 5.066 |
| PRPH2   | -0.229 | 0.296 | -0.774 | 0.439 | 0.795 | 0.235 | -0.87  | 0.384 | 0.445 | 1.421 |
| PRPH    | 0.167  | 0.296 | 0.565  | 0.572 | 1.182 | 0.35  | 0.52   | 0.603 | 0.661 | 2.113 |
| PRPF8   | -0.223 | 0.297 | -0.751 | 0.452 | 0.8   | 0.238 | -0.842 | 0.4   | 0.447 | 1.432 |
| PRPF6   | 0.13   | 0.295 | 0.441  | 0.66  | 1.139 | 0.336 | 0.413  | 0.68  | 0.638 | 2.032 |
| PRPF4B  | 0.328  | 0.3   | 1.096  | 0.273 | 1.389 | 0.416 | 0.934  | 0.35  | 0.772 | 2.498 |
| PRPF40A | 0.458  | 0.3   | 1.529  | 0.126 | 1.582 | 0.474 | 1.226  | 0.22  | 0.879 | 2.847 |
| PRPF4   | 0.158  | 0.295 | 0.533  | 0.594 | 1.171 | 0.346 | 0.494  | 0.622 | 0.656 | 2.088 |
| PRPF39  | 0.145  | 0.296 | 0.491  | 0.624 | 1.156 | 0.342 | 0.457  | 0.648 | 0.647 | 2.066 |
| PRPF38B | 0.356  | 0.298 | 1.196  | 0.232 | 1.428 | 0.426 | 1.006  | 0.315 | 0.796 | 2.562 |
| PRPF31  | 0.513  | 0.3   | 1.71   | 0.087 | 1.67  | 0.501 | 1.338  | 0.181 | 0.928 | 3.006 |
| PRPF3   | 0.378  | 0.298 | 1.268  | 0.205 | 1.459 | 0.434 | 1.056  | 0.291 | 0.814 | 2.615 |
| PRPF19  | 0.29   | 0.298 | 0.976  | 0.329 | 1.337 | 0.398 | 0.847  | 0.397 | 0.746 | 2.397 |
| PRPF18  | 0.347  | 0.298 | 1.167  | 0.243 | 1.415 | 0.421 | 0.986  | 0.324 | 0.79  | 2.536 |
| PROZ    | 0.341  | 0.3   | 1.139  | 0.255 | 1.407 | 0.422 | 0.965  | 0.334 | 0.782 | 2.531 |
| PROX1   | -0.128 | 0.295 | -0.433 | 0.665 | 0.88  | 0.26  | -0.462 | 0.644 | 0.493 | 1.57  |
| PROSER1 | -0.096 | 0.296 | -0.323 | 0.747 | 0.909 | 0.269 | -0.338 | 0.735 | 0.509 | 1.624 |
| PROS1   | -0.45  | 0.3   | -1.503 | 0.133 | 0.637 | 0.191 | -1.898 | 0.058 | 0.354 | 1.147 |
| PRORY   | 0.263  | 0.296 | 0.887  | 0.375 | 1.3   | 0.385 | 0.78   | 0.435 | 0.728 | 2.324 |
| PRORP   | 0.543  | 0.306 | 1.775  | 0.076 | 1.721 | 0.526 | 1.37   | 0.171 | 0.945 | 3.132 |
| PROP1   | 0.059  | 0.295 | 0.199  | 0.843 | 1.06  | 0.313 | 0.193  | 0.847 | 0.594 | 1.892 |
| PROM1   | 0.418  | 0.302 | 1.384  | 0.166 | 1.519 | 0.459 | 1.131  | 0.258 | 0.84  | 2.747 |
| PRODH2  | 0.179  | 0.295 | 0.605  | 0.545 | 1.196 | 0.353 | 0.554  | 0.58  | 0.67  | 2.133 |
| PROCR   | 0.03   | 0.296 | 0.101  | 0.919 | 1.03  | 0.305 | 0.1    | 0.921 | 0.577 | 1.842 |
| PROC    | -0.184 | 0.298 | -0.618 | 0.537 | 0.832 | 0.248 | -0.679 | 0.497 | 0.464 | 1.492 |
| PRNP    | -0.401 | 0.299 | -1.343 | 0.179 | 0.669 | 0.2   | -1.653 | 0.098 | 0.373 | 1.202 |
| PRND    | 0.045  | 0.295 | 0.154  | 0.878 | 1.046 | 0.309 | 0.15   | 0.881 | 0.587 | 1.867 |
| PRMT8   | 0.538  | 0.302 | 1.778  | 0.075 | 1.712 | 0.518 | 1.376  | 0.169 | 0.947 | 3.097 |
| PRMT7   | 0.363  | 0.299 | 1.212  | 0.225 | 1.438 | 0.43  | 1.017  | 0.309 | 0.799 | 2.585 |
| PRMT5   | -0.205 | 0.298 | -0.689 | 0.491 | 0.815 | 0.243 | -0.765 | 0.445 | 0.454 | 1.46  |
| PRMT3   | 0.298  | 0.296 | 1.005  | 0.315 | 1.347 | 0.399 | 0.869  | 0.385 | 0.754 | 2.406 |
| PRMT2   | -0.187 | 0.296 | -0.633 | 0.527 | 0.829 | 0.246 | -0.696 | 0.486 | 0.464 | 1.481 |
| PRMT1   | -0.036 | 0.295 | -0.121 | 0.904 | 0.965 | 0.285 | -0.123 | 0.902 | 0.541 | 1.721 |
| PRM2    | 0.166  | 0.296 | 0.562  | 0.574 | 1.181 | 0.35  | 0.517  | 0.605 | 0.661 | 2.11  |
| PRM1    | 0.143  | 0.298 | 0.479  | 0.632 | 1.153 | 0.343 | 0.446  | 0.655 | 0.644 | 2.066 |
| PRLR    | 0.271  | 0.296 | 0.913  | 0.361 | 1.311 | 0.389 | 0.8    | 0.424 | 0.733 | 2.343 |
| PRLH    | 0.406  | 0.302 | 1.343  | 0.179 | 1.5   | 0.453 | 1.104  | 0.27  | 0.83  | 2.713 |
| PRL     | 0.03   | 0.296 | 0.101  | 0.92  | 1.03  | 0.305 | 0.099  | 0.921 | 0.577 | 1.839 |



|           |        |       |        |       |       |       |        |       |       |       |
|-----------|--------|-------|--------|-------|-------|-------|--------|-------|-------|-------|
| PRKY      | -0.055 | 0.296 | -0.185 | 0.853 | 0.947 | 0.28  | -0.19  | 0.849 | 0.53  | 1.692 |
| PRKX      | 0.385  | 0.303 | 1.27   | 0.204 | 1.47  | 0.446 | 1.054  | 0.292 | 0.811 | 2.664 |
| PRKRA     | -0.393 | 0.303 | -1.298 | 0.194 | 0.675 | 0.204 | -1.59  | 0.112 | 0.373 | 1.222 |
| PRKN      | -0.505 | 0.302 | -1.669 | 0.095 | 0.604 | 0.183 | -2.17  | 0.03  | 0.334 | 1.092 |
| PRKG2     | 0.413  | 0.302 | 1.364  | 0.173 | 1.511 | 0.457 | 1.118  | 0.264 | 0.835 | 2.733 |
| PRKG1     | 0.051  | 0.295 | 0.172  | 0.864 | 1.052 | 0.311 | 0.167  | 0.867 | 0.59  | 1.876 |
| PRKDC     | 0.892  | 0.321 | 2.776  | 0.005 | 2.44  | 0.784 | 1.837  | 0.066 | 1.3   | 4.58  |
| PRKD3     | 0.045  | 0.295 | 0.151  | 0.88  | 1.046 | 0.309 | 0.148  | 0.883 | 0.586 | 1.866 |
| PRKD2     | -0.425 | 0.298 | -1.423 | 0.155 | 0.654 | 0.195 | -1.773 | 0.076 | 0.364 | 1.174 |
| PRKD1     | 0.012  | 0.295 | 0.04   | 0.968 | 1.012 | 0.299 | 0.04   | 0.968 | 0.567 | 1.804 |
| PRKCZ-AS1 | -0.564 | 0.303 | -1.861 | 0.063 | 0.569 | 0.172 | -2.499 | 0.012 | 0.314 | 1.031 |
| PRKCZ     | -0.301 | 0.298 | -1.013 | 0.311 | 0.74  | 0.22  | -1.183 | 0.237 | 0.413 | 1.325 |
| PRKCSH    | -0.07  | 0.295 | -0.238 | 0.812 | 0.932 | 0.275 | -0.247 | 0.805 | 0.522 | 1.663 |
| PRKCQ     | -0.058 | 0.295 | -0.195 | 0.845 | 0.944 | 0.279 | -0.201 | 0.841 | 0.529 | 1.684 |
| PRKCI     | 0.805  | 0.316 | 2.547  | 0.011 | 2.237 | 0.707 | 1.749  | 0.08  | 1.204 | 4.156 |
| PRKCH     | -0.675 | 0.303 | -2.226 | 0.026 | 0.509 | 0.154 | -3.179 | 0.001 | 0.281 | 0.923 |
| PRKCG     | 0.177  | 0.295 | 0.601  | 0.548 | 1.194 | 0.353 | 0.55   | 0.582 | 0.669 | 2.131 |
| PRKCE     | -0.176 | 0.296 | -0.596 | 0.551 | 0.838 | 0.248 | -0.651 | 0.515 | 0.47  | 1.497 |
| PRKCD     | -0.356 | 0.298 | -1.195 | 0.232 | 0.701 | 0.209 | -1.436 | 0.151 | 0.391 | 1.256 |
| PRKCB     | -0.554 | 0.303 | -1.827 | 0.068 | 0.575 | 0.174 | -2.441 | 0.015 | 0.317 | 1.041 |
| PRKCA     | -0.444 | 0.3   | -1.481 | 0.139 | 0.642 | 0.192 | -1.863 | 0.062 | 0.357 | 1.154 |
| PRKAR2B   | -0.741 | 0.315 | -2.352 | 0.019 | 0.477 | 0.15  | -3.484 | 0     | 0.257 | 0.884 |
| PRKAR2A   | -0.291 | 0.296 | -0.983 | 0.326 | 0.747 | 0.221 | -1.141 | 0.254 | 0.418 | 1.336 |
| PRKAR1B   | 0.238  | 0.298 | 0.799  | 0.424 | 1.269 | 0.378 | 0.711  | 0.477 | 0.707 | 2.276 |
| PRKAR1A   | -0.181 | 0.296 | -0.611 | 0.541 | 0.834 | 0.247 | -0.67  | 0.503 | 0.467 | 1.491 |
| PRKAG2    | 0.033  | 0.295 | 0.111  | 0.912 | 1.033 | 0.305 | 0.109  | 0.913 | 0.579 | 1.843 |
| PRKAG1    | -0.567 | 0.31  | -1.827 | 0.068 | 0.567 | 0.176 | -2.457 | 0.014 | 0.309 | 1.042 |
| PRKACG    | 0.344  | 0.298 | 1.156  | 0.248 | 1.411 | 0.42  | 0.978  | 0.328 | 0.787 | 2.531 |
| PRKACB    | -0.232 | 0.296 | -0.783 | 0.434 | 0.793 | 0.235 | -0.881 | 0.378 | 0.444 | 1.417 |
| PRKACA    | -0.207 | 0.296 | -0.699 | 0.485 | 0.813 | 0.241 | -0.776 | 0.438 | 0.455 | 1.453 |
| PRKAB2    | 0.575  | 0.303 | 1.9    | 0.057 | 1.778 | 0.538 | 1.445  | 0.149 | 0.982 | 3.219 |
| PRKAB1    | -0.703 | 0.315 | -2.233 | 0.026 | 0.495 | 0.156 | -3.238 | 0.001 | 0.267 | 0.918 |
| PRKAA2    | -0.203 | 0.296 | -0.685 | 0.493 | 0.816 | 0.242 | -0.76  | 0.447 | 0.457 | 1.458 |
| PRKAA1    | -0.345 | 0.3   | -1.15  | 0.25  | 0.708 | 0.212 | -1.373 | 0.17  | 0.394 | 1.275 |
| PRINS     | 0.151  | 0.298 | 0.506  | 0.613 | 1.163 | 0.346 | 0.469  | 0.639 | 0.648 | 2.084 |
| PRIM2     | 0.143  | 0.297 | 0.481  | 0.63  | 1.154 | 0.342 | 0.448  | 0.654 | 0.645 | 2.064 |
| PRIM1     | 0.248  | 0.296 | 0.836  | 0.403 | 1.281 | 0.379 | 0.74   | 0.459 | 0.717 | 2.289 |
| PRICKLE3  | -0.16  | 0.297 | -0.538 | 0.59  | 0.852 | 0.253 | -0.584 | 0.559 | 0.476 | 1.526 |

|          |        |       |        |       |       |       |        |       |       |       |
|----------|--------|-------|--------|-------|-------|-------|--------|-------|-------|-------|
| PRG4     | 0.217  | 0.296 | 0.731  | 0.465 | 1.242 | 0.368 | 0.657  | 0.511 | 0.695 | 2.22  |
| PRG3     | 0.09   | 0.296 | 0.304  | 0.761 | 1.094 | 0.323 | 0.291  | 0.771 | 0.613 | 1.953 |
| PRG2     | -0.524 | 0.303 | -1.729 | 0.084 | 0.592 | 0.179 | -2.272 | 0.023 | 0.327 | 1.072 |
| PRF1     | -0.13  | 0.296 | -0.441 | 0.659 | 0.878 | 0.26  | -0.471 | 0.637 | 0.492 | 1.567 |
| PREX2    | -0.136 | 0.296 | -0.459 | 0.646 | 0.873 | 0.258 | -0.492 | 0.623 | 0.489 | 1.56  |
| PREPL    | -0.515 | 0.302 | -1.702 | 0.089 | 0.598 | 0.181 | -2.225 | 0.026 | 0.33  | 1.081 |
| PREP     | 0.065  | 0.296 | 0.221  | 0.825 | 1.067 | 0.316 | 0.214  | 0.831 | 0.598 | 1.906 |
| PRELP    | -0.335 | 0.297 | -1.128 | 0.259 | 0.716 | 0.212 | -1.34  | 0.18  | 0.4   | 1.28  |
| PRELID3B | 0.245  | 0.298 | 0.822  | 0.411 | 1.278 | 0.381 | 0.729  | 0.466 | 0.713 | 2.291 |
| PRELID3A | 0.278  | 0.298 | 0.935  | 0.35  | 1.321 | 0.393 | 0.817  | 0.414 | 0.737 | 2.368 |
| PREB     | -0.219 | 0.296 | -0.74  | 0.459 | 0.803 | 0.238 | -0.827 | 0.408 | 0.449 | 1.436 |
| PRDX6    | 0.826  | 0.315 | 2.623  | 0.009 | 2.283 | 0.719 | 1.786  | 0.074 | 1.232 | 4.232 |
| PRDX4    | 0.023  | 0.296 | 0.078  | 0.938 | 1.023 | 0.303 | 0.077  | 0.938 | 0.573 | 1.828 |
| PRDX3    | -0.268 | 0.3   | -0.894 | 0.372 | 0.765 | 0.229 | -1.025 | 0.306 | 0.425 | 1.377 |
| PRDX2    | 0.64   | 0.305 | 2.098  | 0.036 | 1.897 | 0.579 | 1.549  | 0.121 | 1.043 | 3.45  |
| PRDX1    | 0.074  | 0.295 | 0.252  | 0.801 | 1.077 | 0.318 | 0.243  | 0.808 | 0.604 | 1.92  |
| PRDM9    | 0.395  | 0.298 | 1.326  | 0.185 | 1.484 | 0.442 | 1.096  | 0.273 | 0.828 | 2.661 |
| PRDM8    | 0.068  | 0.298 | 0.227  | 0.82  | 1.07  | 0.319 | 0.22   | 0.826 | 0.597 | 1.919 |
| PRDM5    | 0.676  | 0.31  | 2.178  | 0.029 | 1.965 | 0.61  | 1.583  | 0.113 | 1.07  | 3.61  |
| PRDM4    | 0.231  | 0.296 | 0.779  | 0.436 | 1.26  | 0.373 | 0.696  | 0.487 | 0.705 | 2.252 |
| PRDM2    | -0.739 | 0.315 | -2.349 | 0.019 | 0.478 | 0.15  | -3.477 | 0.001 | 0.258 | 0.885 |
| PRDM16   | -0.022 | 0.295 | -0.075 | 0.941 | 0.978 | 0.289 | -0.075 | 0.94  | 0.549 | 1.744 |
| PRDM14   | -0.214 | 0.298 | -0.717 | 0.473 | 0.807 | 0.241 | -0.799 | 0.424 | 0.45  | 1.449 |
| PRDM13   | 0.333  | 0.298 | 1.117  | 0.264 | 1.395 | 0.416 | 0.95   | 0.342 | 0.778 | 2.502 |
| PRDM12   | 0.987  | 0.328 | 3.012  | 0.003 | 2.683 | 0.879 | 1.914  | 0.056 | 1.412 | 5.099 |
| PRDM11   | -0.278 | 0.3   | -0.926 | 0.354 | 0.757 | 0.227 | -1.067 | 0.286 | 0.421 | 1.364 |
| PRDM10   | -0.221 | 0.296 | -0.747 | 0.455 | 0.801 | 0.238 | -0.836 | 0.403 | 0.448 | 1.433 |
| PRDM1    | 0.551  | 0.3   | 1.835  | 0.067 | 1.735 | 0.521 | 1.411  | 0.158 | 0.963 | 3.125 |
| PRCP     | -0.444 | 0.3   | -1.482 | 0.138 | 0.641 | 0.192 | -1.866 | 0.062 | 0.356 | 1.154 |
| PRCC     | 0.28   | 0.297 | 0.945  | 0.345 | 1.323 | 0.392 | 0.824  | 0.41  | 0.74  | 2.367 |
| PRC1     | 0.911  | 0.315 | 2.894  | 0.004 | 2.486 | 0.782 | 1.899  | 0.058 | 1.342 | 4.606 |
| PRB4     | 0.053  | 0.296 | 0.18   | 0.857 | 1.055 | 0.312 | 0.175  | 0.861 | 0.591 | 1.884 |
| PRB3     | 0.662  | 0.303 | 2.185  | 0.029 | 1.939 | 0.587 | 1.598  | 0.11  | 1.071 | 3.511 |
| PRB1     | 0.319  | 0.298 | 1.072  | 0.284 | 1.376 | 0.41  | 0.918  | 0.359 | 0.768 | 2.466 |
| PRAMEF12 | -0.001 | 0.296 | -0.003 | 0.997 | 0.999 | 0.296 | -0.003 | 0.997 | 0.559 | 1.786 |
| PRAMEF11 | 0.041  | 0.296 | 0.138  | 0.89  | 1.042 | 0.309 | 0.135  | 0.892 | 0.583 | 1.861 |
| PRAMEF10 | 0.251  | 0.296 | 0.848  | 0.397 | 1.285 | 0.381 | 0.75   | 0.453 | 0.719 | 2.297 |
| PRAME    | 0.259  | 0.301 | 0.861  | 0.389 | 1.295 | 0.389 | 0.758  | 0.448 | 0.719 | 2.335 |

|         |        |       |        |       |       |       |        |       |       |       |
|---------|--------|-------|--------|-------|-------|-------|--------|-------|-------|-------|
| PRAF2   | -0.367 | 0.303 | -1.212 | 0.225 | 0.693 | 0.21  | -1.465 | 0.143 | 0.383 | 1.254 |
| POBP1   | -0.499 | 0.306 | -1.633 | 0.102 | 0.607 | 0.186 | -2.118 | 0.034 | 0.333 | 1.105 |
| PPY2P   | -0.255 | 0.298 | -0.855 | 0.393 | 0.775 | 0.231 | -0.974 | 0.33  | 0.432 | 1.39  |
| PPY     | 0.21   | 0.298 | 0.705  | 0.481 | 1.234 | 0.367 | 0.636  | 0.525 | 0.688 | 2.211 |
| PPWD1   | 0.015  | 0.296 | 0.051  | 0.959 | 1.015 | 0.301 | 0.051  | 0.959 | 0.568 | 1.814 |
| PPT1    | 0.183  | 0.298 | 0.616  | 0.538 | 1.201 | 0.358 | 0.563  | 0.574 | 0.67  | 2.153 |
| PPRC1   | 0.4    | 0.298 | 1.342  | 0.18  | 1.492 | 0.445 | 1.106  | 0.269 | 0.832 | 2.677 |
| PPP6R3  | 0.144  | 0.297 | 0.484  | 0.629 | 1.155 | 0.343 | 0.451  | 0.652 | 0.645 | 2.067 |
| PPP6R2  | -0.008 | 0.298 | -0.025 | 0.98  | 0.992 | 0.296 | -0.025 | 0.98  | 0.553 | 1.781 |
| PPP6R1  | 0.458  | 0.3   | 1.53   | 0.126 | 1.581 | 0.474 | 1.227  | 0.22  | 0.879 | 2.845 |
| PPP6C   | 0.366  | 0.298 | 1.229  | 0.219 | 1.442 | 0.43  | 1.029  | 0.303 | 0.804 | 2.587 |
| PPP5C   | -0.308 | 0.3   | -1.027 | 0.305 | 0.735 | 0.22  | -1.202 | 0.229 | 0.409 | 1.323 |
| PPP4R4  | 0.413  | 0.298 | 1.388  | 0.165 | 1.512 | 0.45  | 1.137  | 0.255 | 0.844 | 2.709 |
| PPP4R3B | 0.429  | 0.3   | 1.433  | 0.152 | 1.536 | 0.46  | 1.165  | 0.244 | 0.854 | 2.765 |
| PPP4R3A | -0.2   | 0.299 | -0.669 | 0.503 | 0.819 | 0.245 | -0.741 | 0.459 | 0.455 | 1.471 |
| PPP4R2  | 0.3    | 0.298 | 1.008  | 0.313 | 1.35  | 0.402 | 0.871  | 0.384 | 0.753 | 2.42  |
| PPP4R1  | -0.239 | 0.3   | -0.795 | 0.426 | 0.788 | 0.236 | -0.898 | 0.369 | 0.438 | 1.418 |
| PPP4C   | 0.437  | 0.299 | 1.463  | 0.144 | 1.548 | 0.462 | 1.185  | 0.236 | 0.862 | 2.78  |
| PPP3R1  | 0.289  | 0.298 | 0.969  | 0.332 | 1.335 | 0.398 | 0.842  | 0.4   | 0.744 | 2.395 |
| PPP3CC  | -0.511 | 0.311 | -1.641 | 0.101 | 0.6   | 0.187 | -2.142 | 0.032 | 0.326 | 1.104 |
| PPP3CB  | -0.282 | 0.298 | -0.947 | 0.344 | 0.754 | 0.225 | -1.094 | 0.274 | 0.421 | 1.352 |
| PPP3CA  | 0.025  | 0.295 | 0.086  | 0.931 | 1.026 | 0.303 | 0.085  | 0.932 | 0.575 | 1.829 |
| PPP2R5E | 0.474  | 0.3   | 1.58   | 0.114 | 1.607 | 0.482 | 1.259  | 0.208 | 0.892 | 2.893 |
| PPP2R5D | 0.49   | 0.302 | 1.622  | 0.105 | 1.633 | 0.494 | 1.282  | 0.2   | 0.903 | 2.953 |
| PPP2R5C | -0.337 | 0.3   | -1.123 | 0.261 | 0.714 | 0.214 | -1.335 | 0.182 | 0.397 | 1.285 |
| PPP2R5B | 0.165  | 0.295 | 0.56   | 0.575 | 1.18  | 0.348 | 0.516  | 0.606 | 0.661 | 2.105 |
| PPP2R5A | -0.424 | 0.303 | -1.401 | 0.161 | 0.655 | 0.198 | -1.744 | 0.081 | 0.362 | 1.184 |
| PPP2R3C | -0.31  | 0.298 | -1.041 | 0.298 | 0.734 | 0.218 | -1.221 | 0.222 | 0.409 | 1.314 |
| PPP2R3A | 0.444  | 0.302 | 1.47   | 0.142 | 1.559 | 0.471 | 1.187  | 0.235 | 0.862 | 2.819 |
| PPP2R2D | -0.204 | 0.296 | -0.689 | 0.491 | 0.815 | 0.242 | -0.765 | 0.445 | 0.456 | 1.457 |
| PPP2R2B | 0.04   | 0.295 | 0.136  | 0.892 | 1.041 | 0.307 | 0.134  | 0.894 | 0.584 | 1.857 |
| PPP2R2A | -0.012 | 0.295 | -0.04  | 0.968 | 0.988 | 0.292 | -0.04  | 0.968 | 0.554 | 1.763 |
| PPP2R1B | -0.237 | 0.298 | -0.794 | 0.427 | 0.789 | 0.235 | -0.896 | 0.37  | 0.44  | 1.416 |
| PPP2R1A | -0.217 | 0.296 | -0.733 | 0.464 | 0.805 | 0.238 | -0.818 | 0.413 | 0.45  | 1.438 |
| PPP2CB  | -0.437 | 0.302 | -1.445 | 0.148 | 0.646 | 0.195 | -1.812 | 0.07  | 0.357 | 1.168 |
| PPP2CA  | -0.06  | 0.297 | -0.203 | 0.839 | 0.942 | 0.279 | -0.209 | 0.835 | 0.527 | 1.684 |
| PPP1R9A | 0.121  | 0.296 | 0.409  | 0.683 | 1.129 | 0.334 | 0.385  | 0.7   | 0.632 | 2.014 |
| PPP1R8  | 0.338  | 0.298 | 1.137  | 0.255 | 1.403 | 0.418 | 0.965  | 0.335 | 0.783 | 2.514 |

|          |        |       |        |       |       |       |        |       |       |       |
|----------|--------|-------|--------|-------|-------|-------|--------|-------|-------|-------|
| PPP1R7   | -0.588 | 0.31  | -1.897 | 0.058 | 0.556 | 0.172 | -2.582 | 0.01  | 0.303 | 1.02  |
| PPP1R3D  | 0.033  | 0.295 | 0.113  | 0.91  | 1.034 | 0.305 | 0.111  | 0.911 | 0.58  | 1.844 |
| PPP1R3C  | -0.54  | 0.302 | -1.788 | 0.074 | 0.583 | 0.176 | -2.371 | 0.018 | 0.322 | 1.053 |
| PPP1R3A  | 0.198  | 0.298 | 0.665  | 0.506 | 1.219 | 0.363 | 0.603  | 0.547 | 0.68  | 2.184 |
| PPP1R37  | 0.304  | 0.3   | 1.014  | 0.311 | 1.355 | 0.406 | 0.874  | 0.382 | 0.753 | 2.437 |
| PPP1R2C  | 0.193  | 0.295 | 0.654  | 0.513 | 1.213 | 0.358 | 0.595  | 0.552 | 0.68  | 2.165 |
| PPP1R26  | -0.314 | 0.3   | -1.046 | 0.296 | 0.731 | 0.219 | -1.229 | 0.219 | 0.406 | 1.315 |
| PPP1R2   | 0.387  | 0.298 | 1.298  | 0.194 | 1.473 | 0.439 | 1.076  | 0.282 | 0.821 | 2.643 |
| PPP1R1A  | 0.13   | 0.295 | 0.439  | 0.661 | 1.138 | 0.336 | 0.412  | 0.681 | 0.638 | 2.031 |
| PPP1R17  | -0.167 | 0.296 | -0.564 | 0.573 | 0.846 | 0.251 | -0.614 | 0.539 | 0.473 | 1.512 |
| PPP1R16B | -0.432 | 0.298 | -1.447 | 0.148 | 0.649 | 0.194 | -1.81  | 0.07  | 0.362 | 1.165 |
| PPP1R15A | 0.013  | 0.296 | 0.043  | 0.966 | 1.013 | 0.3   | 0.042  | 0.966 | 0.567 | 1.809 |
| PPP1R14D | 0.527  | 0.306 | 1.722  | 0.085 | 1.694 | 0.518 | 1.339  | 0.181 | 0.93  | 3.085 |
| PPP1R14B | 0.614  | 0.306 | 2.01   | 0.044 | 1.849 | 0.565 | 1.502  | 0.133 | 1.015 | 3.366 |
| PPP1R13L | 0.06   | 0.295 | 0.202  | 0.84  | 1.062 | 0.314 | 0.196  | 0.844 | 0.595 | 1.894 |
| PPP1R13B | 0.262  | 0.298 | 0.879  | 0.379 | 1.299 | 0.387 | 0.773  | 0.439 | 0.725 | 2.328 |
| PPP1R12B | -0.701 | 0.304 | -2.302 | 0.021 | 0.496 | 0.151 | -3.335 | 0.001 | 0.273 | 0.901 |
| PPP1R12A | 0.072  | 0.296 | 0.243  | 0.808 | 1.075 | 0.318 | 0.235  | 0.815 | 0.602 | 1.918 |
| PPP1R11  | -0.206 | 0.296 | -0.696 | 0.486 | 0.814 | 0.241 | -0.773 | 0.439 | 0.455 | 1.454 |
| PPP1R10  | -0.317 | 0.3   | -1.055 | 0.292 | 0.729 | 0.219 | -1.241 | 0.215 | 0.404 | 1.312 |
| PPP1CC   | -0.417 | 0.3   | -1.393 | 0.164 | 0.659 | 0.197 | -1.728 | 0.084 | 0.366 | 1.185 |
| PPP1CB   | 0.053  | 0.295 | 0.179  | 0.858 | 1.054 | 0.311 | 0.174  | 0.862 | 0.591 | 1.881 |
| PPP1CA   | 0.185  | 0.295 | 0.625  | 0.532 | 1.203 | 0.355 | 0.571  | 0.568 | 0.674 | 2.145 |
| PPOX     | -0.173 | 0.298 | -0.581 | 0.561 | 0.841 | 0.251 | -0.634 | 0.526 | 0.468 | 1.509 |
| PPME1    | -0.036 | 0.296 | -0.122 | 0.903 | 0.964 | 0.285 | -0.125 | 0.901 | 0.54  | 1.722 |
| PPM1H    | 0.251  | 0.298 | 0.844  | 0.399 | 1.286 | 0.383 | 0.746  | 0.455 | 0.717 | 2.304 |
| PPM1G    | 0.253  | 0.296 | 0.855  | 0.393 | 1.288 | 0.382 | 0.755  | 0.45  | 0.721 | 2.302 |
| PPM1F    | 0.184  | 0.299 | 0.615  | 0.539 | 1.202 | 0.36  | 0.562  | 0.574 | 0.669 | 2.161 |
| PPM1E    | -0.012 | 0.295 | -0.042 | 0.967 | 0.988 | 0.292 | -0.042 | 0.966 | 0.554 | 1.762 |
| PPM1D    | 1.061  | 0.322 | 3.298  | 0.001 | 2.889 | 0.929 | 2.033  | 0.042 | 1.538 | 5.428 |
| PPM1B    | 0.104  | 0.295 | 0.353  | 0.724 | 1.11  | 0.328 | 0.335  | 0.738 | 0.622 | 1.979 |
| PPM1A    | -0.021 | 0.301 | -0.071 | 0.943 | 0.979 | 0.294 | -0.072 | 0.943 | 0.543 | 1.765 |
| PPL      | 0.285  | 0.3   | 0.952  | 0.341 | 1.33  | 0.399 | 0.828  | 0.408 | 0.739 | 2.394 |
| PPIP5K2  | 0.041  | 0.296 | 0.138  | 0.891 | 1.042 | 0.309 | 0.135  | 0.893 | 0.583 | 1.862 |
| PPIP5K1  | -0.103 | 0.297 | -0.346 | 0.729 | 0.902 | 0.268 | -0.365 | 0.715 | 0.505 | 1.614 |
| PPIL2    | 0.078  | 0.296 | 0.264  | 0.792 | 1.081 | 0.32  | 0.254  | 0.8   | 0.606 | 1.93  |
| PPIH     | 0.661  | 0.305 | 2.166  | 0.03  | 1.937 | 0.591 | 1.585  | 0.113 | 1.065 | 3.522 |
| PPIG     | 0.887  | 0.313 | 2.831  | 0.005 | 2.427 | 0.76  | 1.878  | 0.06  | 1.314 | 4.483 |

|          |        |       |        |       |       |       |        |       |       |       |
|----------|--------|-------|--------|-------|-------|-------|--------|-------|-------|-------|
| PPIF     | 0.337  | 0.298 | 1.133  | 0.257 | 1.401 | 0.417 | 0.962  | 0.336 | 0.782 | 2.511 |
| PPIEL    | -0.489 | 0.302 | -1.617 | 0.106 | 0.613 | 0.185 | -2.086 | 0.037 | 0.339 | 1.109 |
| PPIE     | 0.309  | 0.296 | 1.043  | 0.297 | 1.362 | 0.404 | 0.897  | 0.37  | 0.762 | 2.435 |
| PPID     | 0.437  | 0.302 | 1.444  | 0.149 | 1.547 | 0.468 | 1.17   | 0.242 | 0.856 | 2.799 |
| PPIC     | -0.14  | 0.295 | -0.475 | 0.635 | 0.869 | 0.257 | -0.51  | 0.61  | 0.487 | 1.551 |
| PIIB     | 0.175  | 0.296 | 0.591  | 0.555 | 1.191 | 0.352 | 0.542  | 0.588 | 0.667 | 2.125 |
| PPIA     | 0.195  | 0.296 | 0.658  | 0.511 | 1.215 | 0.36  | 0.598  | 0.55  | 0.68  | 2.17  |
| PPFIBP2  | -0.125 | 0.297 | -0.421 | 0.674 | 0.883 | 0.262 | -0.449 | 0.654 | 0.494 | 1.578 |
| PPFIBP1  | 0.065  | 0.295 | 0.219  | 0.826 | 1.067 | 0.315 | 0.212  | 0.832 | 0.598 | 1.904 |
| PPFIA4   | 0.659  | 0.306 | 2.157  | 0.031 | 1.933 | 0.591 | 1.58   | 0.114 | 1.062 | 3.519 |
| PPFIA3   | -0.437 | 0.302 | -1.446 | 0.148 | 0.646 | 0.195 | -1.813 | 0.07  | 0.357 | 1.168 |
| PPFIA2   | 0.258  | 0.297 | 0.868  | 0.386 | 1.294 | 0.385 | 0.765  | 0.444 | 0.723 | 2.319 |
| PPFIA1   | 0.657  | 0.303 | 2.166  | 0.03  | 1.928 | 0.585 | 1.588  | 0.112 | 1.065 | 3.494 |
| PPEF2    | -0.178 | 0.297 | -0.6   | 0.548 | 0.837 | 0.248 | -0.657 | 0.511 | 0.468 | 1.497 |
| PPEF1    | -0.478 | 0.302 | -1.58  | 0.114 | 0.62  | 0.187 | -2.025 | 0.043 | 0.343 | 1.122 |
| PPDPF    | -0.353 | 0.3   | -1.177 | 0.239 | 0.703 | 0.211 | -1.411 | 0.158 | 0.39  | 1.265 |
| PPCS     | -0.289 | 0.301 | -0.961 | 0.336 | 0.749 | 0.225 | -1.115 | 0.265 | 0.415 | 1.351 |
| PPCDC    | 0.636  | 0.304 | 2.095  | 0.036 | 1.888 | 0.573 | 1.55   | 0.121 | 1.042 | 3.424 |
| PPBPP2   | 0.181  | 0.296 | 0.611  | 0.541 | 1.199 | 0.355 | 0.559  | 0.576 | 0.67  | 2.143 |
| PPBP     | -0.396 | 0.3   | -1.321 | 0.186 | 0.673 | 0.202 | -1.621 | 0.105 | 0.374 | 1.211 |
| PPAT     | 0.56   | 0.306 | 1.832  | 0.067 | 1.751 | 0.536 | 1.403  | 0.161 | 0.962 | 3.189 |
| PPARGC1A | -0.153 | 0.295 | -0.517 | 0.605 | 0.858 | 0.253 | -0.559 | 0.576 | 0.481 | 1.531 |
| PPARG    | -0.562 | 0.306 | -1.838 | 0.066 | 0.57  | 0.174 | -2.465 | 0.014 | 0.313 | 1.038 |
| PPARD    | 0.878  | 0.321 | 2.739  | 0.006 | 2.406 | 0.771 | 1.823  | 0.068 | 1.284 | 4.51  |
| PPARA    | -0.018 | 0.295 | -0.062 | 0.95  | 0.982 | 0.29  | -0.063 | 0.95  | 0.55  | 1.752 |
| PPA2     | 0.572  | 0.303 | 1.885  | 0.059 | 1.771 | 0.537 | 1.436  | 0.151 | 0.977 | 3.21  |
| PPA1     | -0.447 | 0.3   | -1.49  | 0.136 | 0.64  | 0.192 | -1.878 | 0.06  | 0.355 | 1.152 |
| POU6F2   | 0.107  | 0.296 | 0.36   | 0.719 | 1.112 | 0.329 | 0.342  | 0.733 | 0.623 | 1.986 |
| POU6F1   | -0.155 | 0.295 | -0.524 | 0.601 | 0.857 | 0.253 | -0.566 | 0.571 | 0.48  | 1.529 |
| POU5F1P4 | -0.328 | 0.3   | -1.094 | 0.274 | 0.721 | 0.216 | -1.294 | 0.196 | 0.401 | 1.296 |
| POU5F1P3 | -0.116 | 0.295 | -0.394 | 0.693 | 0.89  | 0.263 | -0.418 | 0.676 | 0.499 | 1.588 |
| POU5F1B  | -0.222 | 0.296 | -0.75  | 0.453 | 0.801 | 0.237 | -0.84  | 0.401 | 0.448 | 1.431 |
| POU4F3   | 0.624  | 0.303 | 2.058  | 0.04  | 1.867 | 0.566 | 1.531  | 0.126 | 1.03  | 3.382 |
| POU4F2   | -0.112 | 0.296 | -0.379 | 0.705 | 0.894 | 0.265 | -0.401 | 0.689 | 0.5   | 1.597 |
| POU4F1   | 0.186  | 0.297 | 0.628  | 0.53  | 1.205 | 0.357 | 0.573  | 0.567 | 0.674 | 2.155 |
| POU3F4   | 0.221  | 0.296 | 0.746  | 0.456 | 1.247 | 0.369 | 0.669  | 0.503 | 0.698 | 2.228 |
| POU3F3   | -0.473 | 0.3   | -1.576 | 0.115 | 0.623 | 0.187 | -2.015 | 0.044 | 0.346 | 1.122 |
| POU3F2   | 0.23   | 0.297 | 0.773  | 0.439 | 1.259 | 0.374 | 0.691  | 0.49  | 0.703 | 2.255 |

|           |        |       |        |       |       |       |        |       |       |       |
|-----------|--------|-------|--------|-------|-------|-------|--------|-------|-------|-------|
| POU3F1    | -0.322 | 0.301 | -1.07  | 0.285 | 0.725 | 0.218 | -1.262 | 0.207 | 0.402 | 1.307 |
| POU2F3    | 0.147  | 0.296 | 0.497  | 0.619 | 1.158 | 0.343 | 0.462  | 0.644 | 0.649 | 2.068 |
| POU2F2    | 0.43   | 0.3   | 1.433  | 0.152 | 1.537 | 0.461 | 1.165  | 0.244 | 0.854 | 2.765 |
| POU2F1    | 0.209  | 0.296 | 0.704  | 0.481 | 1.232 | 0.365 | 0.636  | 0.525 | 0.689 | 2.202 |
| POU2AF1   | -0.43  | 0.3   | -1.436 | 0.151 | 0.65  | 0.195 | -1.795 | 0.073 | 0.361 | 1.17  |
| POU1F1    | -0.46  | 0.303 | -1.52  | 0.129 | 0.631 | 0.191 | -1.929 | 0.054 | 0.349 | 1.143 |
| POTEKP    | 0.162  | 0.296 | 0.548  | 0.584 | 1.176 | 0.348 | 0.506  | 0.613 | 0.659 | 2.099 |
| POT1      | -0.02  | 0.295 | -0.067 | 0.947 | 0.98  | 0.29  | -0.067 | 0.946 | 0.549 | 1.749 |
| POSTN     | -0.249 | 0.296 | -0.841 | 0.401 | 0.78  | 0.231 | -0.954 | 0.34  | 0.436 | 1.393 |
| PORCN     | -0.526 | 0.302 | -1.74  | 0.082 | 0.591 | 0.179 | -2.29  | 0.022 | 0.327 | 1.069 |
| POR       | -0.257 | 0.298 | -0.862 | 0.389 | 0.774 | 0.23  | -0.983 | 0.326 | 0.432 | 1.386 |
| POPDC3    | 0.234  | 0.298 | 0.786  | 0.432 | 1.264 | 0.377 | 0.7    | 0.484 | 0.705 | 2.268 |
| POPDC2    | -0.112 | 0.295 | -0.378 | 0.706 | 0.894 | 0.264 | -0.4   | 0.69  | 0.501 | 1.596 |
| POP7      | 0.452  | 0.299 | 1.512  | 0.13  | 1.571 | 0.47  | 1.217  | 0.224 | 0.875 | 2.823 |
| POP5      | -0.234 | 0.3   | -0.779 | 0.436 | 0.791 | 0.238 | -0.878 | 0.38  | 0.439 | 1.426 |
| POP4      | 0.645  | 0.302 | 2.135  | 0.033 | 1.907 | 0.577 | 1.573  | 0.116 | 1.054 | 3.449 |
| POP1      | 0.256  | 0.298 | 0.859  | 0.39  | 1.292 | 0.385 | 0.758  | 0.449 | 0.72  | 2.316 |
| PON3      | 0.11   | 0.296 | 0.373  | 0.709 | 1.117 | 0.33  | 0.354  | 0.724 | 0.626 | 1.993 |
| PON2      | -0.519 | 0.302 | -1.717 | 0.086 | 0.595 | 0.18  | -2.251 | 0.024 | 0.329 | 1.076 |
| PON1      | 0.437  | 0.3   | 1.455  | 0.146 | 1.548 | 0.464 | 1.179  | 0.238 | 0.859 | 2.787 |
| POMZP3    | 0.335  | 0.298 | 1.126  | 0.26  | 1.398 | 0.416 | 0.957  | 0.339 | 0.78  | 2.506 |
| POMT2     | 0.772  | 0.31  | 2.486  | 0.013 | 2.163 | 0.672 | 1.733  | 0.083 | 1.177 | 3.975 |
| POMT1     | 0.114  | 0.295 | 0.386  | 0.699 | 1.121 | 0.331 | 0.365  | 0.715 | 0.628 | 1.999 |
| POMP      | 1.698  | 0.373 | 4.547  | 0     | 5.464 | 2.041 | 2.188  | 0.029 | 2.628 | 11.36 |
| POMGNT1   | -0.319 | 0.304 | -1.051 | 0.293 | 0.727 | 0.221 | -1.238 | 0.216 | 0.401 | 1.318 |
| POMC      | 0.246  | 0.297 | 0.83   | 0.407 | 1.28  | 0.38  | 0.735  | 0.462 | 0.715 | 2.291 |
| POM121L9P | 0.049  | 0.296 | 0.167  | 0.868 | 1.051 | 0.311 | 0.163  | 0.871 | 0.588 | 1.875 |
| POM121L2  | -0.498 | 0.302 | -1.645 | 0.1   | 0.608 | 0.184 | -2.132 | 0.033 | 0.336 | 1.1   |
| POM121    | 0.361  | 0.3   | 1.205  | 0.228 | 1.435 | 0.43  | 1.012  | 0.312 | 0.798 | 2.581 |
| POLRMT    | 0.38   | 0.297 | 1.277  | 0.201 | 1.462 | 0.435 | 1.063  | 0.288 | 0.816 | 2.619 |
| POLR3K    | 0.409  | 0.299 | 1.369  | 0.171 | 1.505 | 0.449 | 1.124  | 0.261 | 0.838 | 2.702 |
| POLR3G    | 0.441  | 0.299 | 1.478  | 0.139 | 1.555 | 0.464 | 1.195  | 0.232 | 0.866 | 2.793 |
| POLR3F    | 0.154  | 0.297 | 0.52   | 0.603 | 1.167 | 0.346 | 0.482  | 0.63  | 0.652 | 2.087 |
| POLR3D    | -0.342 | 0.3   | -1.143 | 0.253 | 0.71  | 0.213 | -1.363 | 0.173 | 0.395 | 1.277 |
| POLR3C    | 0.27   | 0.296 | 0.91   | 0.363 | 1.31  | 0.388 | 0.797  | 0.425 | 0.733 | 2.341 |
| POLR3B    | 0.421  | 0.303 | 1.387  | 0.165 | 1.523 | 0.462 | 1.132  | 0.257 | 0.841 | 2.76  |
| POLR2L    | -0.37  | 0.304 | -1.218 | 0.223 | 0.691 | 0.21  | -1.474 | 0.141 | 0.381 | 1.253 |
| POLR2K    | 0.446  | 0.299 | 1.489  | 0.136 | 1.562 | 0.468 | 1.201  | 0.23  | 0.868 | 2.809 |

|         |        |       |        |       |       |       |        |       |       |       |
|---------|--------|-------|--------|-------|-------|-------|--------|-------|-------|-------|
| POLR2J4 | -0.118 | 0.295 | -0.399 | 0.69  | 0.889 | 0.263 | -0.424 | 0.672 | 0.498 | 1.586 |
| POLR2J  | 0.335  | 0.299 | 1.12   | 0.263 | 1.398 | 0.419 | 0.952  | 0.341 | 0.778 | 2.514 |
| POLR2I  | 0.355  | 0.297 | 1.196  | 0.232 | 1.426 | 0.423 | 1.007  | 0.314 | 0.797 | 2.552 |
| POLR2H  | 0.793  | 0.31  | 2.56   | 0.01  | 2.209 | 0.684 | 1.767  | 0.077 | 1.204 | 4.054 |
| POLR2G  | 0.177  | 0.296 | 0.598  | 0.55  | 1.193 | 0.353 | 0.548  | 0.584 | 0.669 | 2.13  |
| POLR2F  | 0.662  | 0.306 | 2.167  | 0.03  | 1.939 | 0.593 | 1.584  | 0.113 | 1.065 | 3.531 |
| POLR2E  | 0.008  | 0.301 | 0.027  | 0.978 | 1.008 | 0.304 | 0.027  | 0.978 | 0.559 | 1.819 |
| POLR2D  | 0.121  | 0.297 | 0.407  | 0.684 | 1.129 | 0.335 | 0.383  | 0.701 | 0.63  | 2.02  |
| POLR2C  | -0.201 | 0.297 | -0.677 | 0.499 | 0.818 | 0.243 | -0.75  | 0.454 | 0.457 | 1.464 |
| POLR2B  | -0.075 | 0.297 | -0.253 | 0.801 | 0.928 | 0.276 | -0.262 | 0.793 | 0.518 | 1.661 |
| POLR2A  | -0.205 | 0.296 | -0.694 | 0.488 | 0.814 | 0.241 | -0.77  | 0.441 | 0.456 | 1.454 |
| POLR1G  | 0.175  | 0.296 | 0.592  | 0.554 | 1.192 | 0.353 | 0.543  | 0.587 | 0.667 | 2.13  |
| POLR1F  | -0.251 | 0.298 | -0.844 | 0.398 | 0.778 | 0.231 | -0.96  | 0.337 | 0.434 | 1.394 |
| POLR1E  | 0.036  | 0.296 | 0.121  | 0.904 | 1.037 | 0.307 | 0.119  | 0.905 | 0.58  | 1.851 |
| POLR1D  | 0.016  | 0.296 | 0.055  | 0.956 | 1.016 | 0.301 | 0.055  | 0.956 | 0.569 | 1.815 |
| POLR1C  | 0.362  | 0.298 | 1.216  | 0.224 | 1.436 | 0.427 | 1.02   | 0.308 | 0.801 | 2.573 |
| POLR1B  | 0.24   | 0.302 | 0.797  | 0.426 | 1.272 | 0.384 | 0.708  | 0.479 | 0.704 | 2.297 |
| POLQ    | 0.389  | 0.301 | 1.293  | 0.196 | 1.475 | 0.444 | 1.071  | 0.284 | 0.818 | 2.66  |
| POLM    | -0.101 | 0.295 | -0.34  | 0.734 | 0.904 | 0.267 | -0.358 | 0.72  | 0.507 | 1.614 |
| POLL    | 0.682  | 0.306 | 2.228  | 0.026 | 1.979 | 0.606 | 1.615  | 0.106 | 1.086 | 3.607 |
| POLI    | -0.48  | 0.306 | -1.57  | 0.116 | 0.619 | 0.189 | -2.015 | 0.044 | 0.34  | 1.127 |
| POLH    | 0.111  | 0.296 | 0.374  | 0.708 | 1.117 | 0.33  | 0.354  | 0.723 | 0.625 | 1.995 |
| POLG2   | 0.063  | 0.295 | 0.213  | 0.831 | 1.065 | 0.315 | 0.207  | 0.836 | 0.597 | 1.901 |
| POLG    | 0.695  | 0.306 | 2.272  | 0.023 | 2.004 | 0.613 | 1.638  | 0.101 | 1.1   | 3.649 |
| POLE3   | 0.217  | 0.296 | 0.73   | 0.465 | 1.242 | 0.368 | 0.657  | 0.511 | 0.695 | 2.22  |
| POLE2   | 0.525  | 0.3   | 1.751  | 0.08  | 1.69  | 0.507 | 1.362  | 0.173 | 0.939 | 3.042 |
| POLE    | -0.142 | 0.296 | -0.478 | 0.633 | 0.868 | 0.257 | -0.513 | 0.608 | 0.486 | 1.551 |
| POLDIP3 | -0.366 | 0.303 | -1.207 | 0.228 | 0.694 | 0.21  | -1.457 | 0.145 | 0.383 | 1.256 |
| POLDIP2 | 0.06   | 0.296 | 0.202  | 0.84  | 1.062 | 0.315 | 0.196  | 0.845 | 0.594 | 1.897 |
| POLD4   | 0.404  | 0.298 | 1.354  | 0.176 | 1.498 | 0.447 | 1.114  | 0.265 | 0.835 | 2.688 |
| POLD3   | -0.083 | 0.296 | -0.28  | 0.78  | 0.921 | 0.273 | -0.291 | 0.771 | 0.515 | 1.645 |
| POLD2   | 0.179  | 0.295 | 0.607  | 0.544 | 1.196 | 0.353 | 0.556  | 0.579 | 0.671 | 2.134 |
| POLD1   | 0.421  | 0.298 | 1.414  | 0.157 | 1.524 | 0.454 | 1.154  | 0.248 | 0.85  | 2.731 |
| POLB    | -0.268 | 0.299 | -0.897 | 0.37  | 0.765 | 0.228 | -1.029 | 0.303 | 0.426 | 1.374 |
| POLA2   | 0.323  | 0.298 | 1.084  | 0.278 | 1.381 | 0.411 | 0.927  | 0.354 | 0.771 | 2.475 |
| POLA1   | 0.201  | 0.299 | 0.671  | 0.502 | 1.222 | 0.366 | 0.608  | 0.543 | 0.68  | 2.197 |
| POGZ    | -0.169 | 0.295 | -0.571 | 0.568 | 0.845 | 0.25  | -0.621 | 0.534 | 0.474 | 1.507 |
| POGLUT2 | 0.088  | 0.296 | 0.296  | 0.767 | 1.092 | 0.323 | 0.283  | 0.777 | 0.611 | 1.951 |

|          |        |       |        |       |       |       |        |       |       |       |
|----------|--------|-------|--------|-------|-------|-------|--------|-------|-------|-------|
| POGLUT1  | 0.455  | 0.3   | 1.514  | 0.13  | 1.576 | 0.473 | 1.217  | 0.224 | 0.875 | 2.84  |
| POGK     | -0.115 | 0.296 | -0.388 | 0.698 | 0.892 | 0.264 | -0.411 | 0.681 | 0.5   | 1.591 |
| POFUT2   | 0.326  | 0.298 | 1.096  | 0.273 | 1.386 | 0.413 | 0.935  | 0.35  | 0.773 | 2.484 |
| POFUT1   | -0.575 | 0.31  | -1.853 | 0.064 | 0.563 | 0.175 | -2.504 | 0.012 | 0.306 | 1.034 |
| POF1B    | 0.335  | 0.3   | 1.117  | 0.264 | 1.398 | 0.42  | 0.949  | 0.343 | 0.776 | 2.518 |
| PODXL2   | 0.263  | 0.297 | 0.884  | 0.377 | 1.3   | 0.386 | 0.777  | 0.437 | 0.726 | 2.327 |
| PODXL    | -0.556 | 0.306 | -1.82  | 0.069 | 0.573 | 0.175 | -2.434 | 0.015 | 0.315 | 1.044 |
| PODNL1   | -0.035 | 0.295 | -0.12  | 0.905 | 0.965 | 0.285 | -0.122 | 0.903 | 0.541 | 1.722 |
| PNRC2    | -0.575 | 0.306 | -1.88  | 0.06  | 0.563 | 0.172 | -2.54  | 0.011 | 0.309 | 1.025 |
| PNRC1    | -0.381 | 0.3   | -1.271 | 0.204 | 0.683 | 0.205 | -1.548 | 0.122 | 0.38  | 1.229 |
| PNPO     | 0.285  | 0.298 | 0.956  | 0.339 | 1.33  | 0.396 | 0.832  | 0.405 | 0.741 | 2.385 |
| PNPLA6   | -0.392 | 0.302 | -1.299 | 0.194 | 0.675 | 0.204 | -1.59  | 0.112 | 0.373 | 1.221 |
| PNPLA4   | -0.547 | 0.306 | -1.788 | 0.074 | 0.579 | 0.177 | -2.379 | 0.017 | 0.318 | 1.054 |
| PNPLA3   | 0.752  | 0.31  | 2.423  | 0.015 | 2.122 | 0.659 | 1.703  | 0.089 | 1.155 | 3.9   |
| PNPLA2   | -0.391 | 0.298 | -1.31  | 0.19  | 0.677 | 0.202 | -1.603 | 0.109 | 0.377 | 1.214 |
| PNP      | 0.376  | 0.3   | 1.255  | 0.209 | 1.457 | 0.437 | 1.046  | 0.296 | 0.81  | 2.621 |
| PNOC     | -0.235 | 0.297 | -0.791 | 0.429 | 0.791 | 0.235 | -0.891 | 0.373 | 0.442 | 1.415 |
| PNO1     | 0.253  | 0.296 | 0.854  | 0.393 | 1.288 | 0.382 | 0.754  | 0.451 | 0.721 | 2.302 |
| PNN      | 0.384  | 0.3   | 1.28   | 0.201 | 1.468 | 0.44  | 1.063  | 0.288 | 0.815 | 2.642 |
| PNMT     | 0.5    | 0.303 | 1.651  | 0.099 | 1.648 | 0.499 | 1.299  | 0.194 | 0.911 | 2.984 |
| PNMA8A   | -0.582 | 0.306 | -1.903 | 0.057 | 0.559 | 0.171 | -2.582 | 0.01  | 0.307 | 1.018 |
| PNMA3    | -0.289 | 0.297 | -0.974 | 0.33  | 0.749 | 0.223 | -1.129 | 0.259 | 0.418 | 1.341 |
| PNMA2    | -0.378 | 0.298 | -1.269 | 0.204 | 0.685 | 0.204 | -1.542 | 0.123 | 0.382 | 1.228 |
| PNMA1    | -0.249 | 0.298 | -0.835 | 0.404 | 0.78  | 0.232 | -0.948 | 0.343 | 0.435 | 1.398 |
| PNLIPRP2 | 0.253  | 0.296 | 0.854  | 0.393 | 1.287 | 0.381 | 0.755  | 0.451 | 0.721 | 2.299 |
| PNLIPRP1 | 0.251  | 0.296 | 0.846  | 0.398 | 1.285 | 0.38  | 0.748  | 0.454 | 0.719 | 2.296 |
| PNLIP    | 0.178  | 0.296 | 0.602  | 0.547 | 1.195 | 0.354 | 0.552  | 0.581 | 0.669 | 2.135 |
| PNKP     | -0.232 | 0.301 | -0.772 | 0.44  | 0.793 | 0.238 | -0.869 | 0.385 | 0.44  | 1.429 |
| PNISR    | -0.483 | 0.3   | -1.61  | 0.108 | 0.617 | 0.185 | -2.069 | 0.039 | 0.343 | 1.111 |
| PMVK     | 0.247  | 0.296 | 0.836  | 0.403 | 1.281 | 0.379 | 0.74   | 0.459 | 0.717 | 2.288 |
| PMS2P4   | 0.357  | 0.298 | 1.199  | 0.23  | 1.43  | 0.426 | 1.008  | 0.313 | 0.797 | 2.564 |
| PMS2P3   | 0.085  | 0.296 | 0.288  | 0.773 | 1.089 | 0.322 | 0.276  | 0.782 | 0.61  | 1.944 |
| PMS2P2   | -0.545 | 0.303 | -1.803 | 0.071 | 0.58  | 0.175 | -2.397 | 0.017 | 0.32  | 1.049 |
| PMS2P1   | 0.516  | 0.306 | 1.686  | 0.092 | 1.676 | 0.513 | 1.317  | 0.188 | 0.92  | 3.054 |
| PMS1     | -0.242 | 0.298 | -0.815 | 0.415 | 0.785 | 0.234 | -0.922 | 0.357 | 0.438 | 1.406 |
| PMPCB    | -0.545 | 0.31  | -1.758 | 0.079 | 0.58  | 0.18  | -2.338 | 0.019 | 0.316 | 1.065 |
| PMPCA    | -0.002 | 0.295 | -0.007 | 0.995 | 0.998 | 0.295 | -0.007 | 0.995 | 0.56  | 1.78  |
| PMP22    | -0.092 | 0.295 | -0.311 | 0.756 | 0.912 | 0.269 | -0.326 | 0.744 | 0.511 | 1.627 |



|        |        |       |        |       |       |       |        |       |       |       |
|--------|--------|-------|--------|-------|-------|-------|--------|-------|-------|-------|
| PMP2   | 0.094  | 0.295 | 0.318  | 0.751 | 1.098 | 0.324 | 0.303  | 0.762 | 0.616 | 1.958 |
| PMM2   | 0.345  | 0.298 | 1.158  | 0.247 | 1.413 | 0.421 | 0.979  | 0.327 | 0.787 | 2.535 |
| PMM1   | 0.264  | 0.297 | 0.89   | 0.373 | 1.302 | 0.387 | 0.782  | 0.434 | 0.728 | 2.331 |
| PML    | 0.117  | 0.297 | 0.393  | 0.694 | 1.124 | 0.333 | 0.371  | 0.711 | 0.628 | 2.01  |
| PMFBP1 | 0.097  | 0.295 | 0.33   | 0.741 | 1.102 | 0.326 | 0.314  | 0.753 | 0.618 | 1.966 |
| PMF1   | 0.125  | 0.295 | 0.423  | 0.672 | 1.133 | 0.335 | 0.398  | 0.691 | 0.635 | 2.022 |
| PMEPA1 | -0.277 | 0.296 | -0.935 | 0.35  | 0.758 | 0.225 | -1.077 | 0.281 | 0.424 | 1.355 |
| PMEL   | 0.627  | 0.306 | 2.052  | 0.04  | 1.872 | 0.572 | 1.524  | 0.127 | 1.028 | 3.408 |
| PMCHL1 | 0.592  | 0.306 | 1.936  | 0.053 | 1.808 | 0.553 | 1.461  | 0.144 | 0.993 | 3.293 |
| PMCH   | 0.008  | 0.296 | 0.029  | 0.977 | 1.008 | 0.298 | 0.028  | 0.977 | 0.565 | 1.8   |
| PMAIP1 | 0.17   | 0.295 | 0.574  | 0.566 | 1.185 | 0.35  | 0.528  | 0.597 | 0.664 | 2.114 |
| PLXND1 | 0.025  | 0.296 | 0.086  | 0.932 | 1.026 | 0.304 | 0.084  | 0.933 | 0.574 | 1.832 |
| PLXNC1 | -0.764 | 0.31  | -2.466 | 0.014 | 0.466 | 0.144 | -3.702 | 0     | 0.254 | 0.855 |
| PLXNB3 | 0.311  | 0.298 | 1.044  | 0.297 | 1.364 | 0.406 | 0.897  | 0.37  | 0.761 | 2.445 |
| PLXNB2 | -0.089 | 0.297 | -0.3   | 0.764 | 0.915 | 0.271 | -0.314 | 0.753 | 0.512 | 1.636 |
| PLXNB1 | -0.895 | 0.321 | -2.792 | 0.005 | 0.409 | 0.131 | -4.514 | 0     | 0.218 | 0.766 |
| PLXNA3 | 0.075  | 0.296 | 0.253  | 0.801 | 1.077 | 0.318 | 0.243  | 0.808 | 0.604 | 1.923 |
| PLXNA2 | -0.04  | 0.295 | -0.136 | 0.892 | 0.961 | 0.283 | -0.139 | 0.889 | 0.539 | 1.712 |
| PLXNA1 | 0.321  | 0.303 | 1.058  | 0.29  | 1.378 | 0.418 | 0.905  | 0.365 | 0.761 | 2.497 |
| PLXDC2 | 0.146  | 0.296 | 0.493  | 0.622 | 1.157 | 0.343 | 0.458  | 0.647 | 0.647 | 2.068 |
| PLXDC1 | -0.468 | 0.299 | -1.566 | 0.117 | 0.627 | 0.187 | -1.996 | 0.046 | 0.349 | 1.125 |
| PLVAP  | -0.442 | 0.298 | -1.482 | 0.138 | 0.643 | 0.192 | -1.864 | 0.062 | 0.358 | 1.153 |
| PLTP   | -0.448 | 0.3   | -1.492 | 0.136 | 0.639 | 0.192 | -1.882 | 0.06  | 0.354 | 1.151 |
| PLSCR4 | -0.418 | 0.3   | -1.397 | 0.162 | 0.658 | 0.197 | -1.735 | 0.083 | 0.366 | 1.184 |
| PLSCR2 | 0.189  | 0.296 | 0.637  | 0.524 | 1.208 | 0.358 | 0.581  | 0.561 | 0.676 | 2.158 |
| PLSCR1 | 0.524  | 0.302 | 1.734  | 0.083 | 1.689 | 0.511 | 1.35   | 0.177 | 0.934 | 3.055 |
| PLS3   | -0.141 | 0.295 | -0.477 | 0.633 | 0.869 | 0.256 | -0.512 | 0.608 | 0.487 | 1.549 |
| PLS1   | 0.786  | 0.315 | 2.497  | 0.013 | 2.196 | 0.692 | 1.729  | 0.084 | 1.184 | 4.071 |
| PLPPR4 | 0.006  | 0.295 | 0.02   | 0.984 | 1.006 | 0.297 | 0.02   | 0.984 | 0.564 | 1.794 |
| PLPPR3 | 0.265  | 0.298 | 0.889  | 0.374 | 1.304 | 0.389 | 0.781  | 0.435 | 0.727 | 2.339 |
| PLPPR2 | -0.364 | 0.3   | -1.216 | 0.224 | 0.695 | 0.208 | -1.467 | 0.142 | 0.386 | 1.25  |
| PLPPR1 | -0.268 | 0.297 | -0.903 | 0.366 | 0.765 | 0.227 | -1.036 | 0.3   | 0.427 | 1.368 |
| PLPP3  | -0.181 | 0.296 | -0.613 | 0.54  | 0.834 | 0.247 | -0.673 | 0.501 | 0.467 | 1.489 |
| PLPP2  | -0.121 | 0.295 | -0.41  | 0.681 | 0.886 | 0.262 | -0.436 | 0.663 | 0.497 | 1.58  |
| PLPP1  | -0.795 | 0.315 | -2.527 | 0.012 | 0.451 | 0.142 | -3.861 | 0     | 0.244 | 0.837 |
| PLPBP  | -0.182 | 0.298 | -0.612 | 0.541 | 0.833 | 0.248 | -0.671 | 0.502 | 0.465 | 1.494 |
| PLP2   | 0.315  | 0.296 | 1.063  | 0.288 | 1.37  | 0.406 | 0.912  | 0.362 | 0.767 | 2.449 |
| PLP1   | -0.41  | 0.298 | -1.374 | 0.17  | 0.664 | 0.198 | -1.698 | 0.09  | 0.37  | 1.191 |

|           |        |       |        |       |       |       |        |       |       |       |
|-----------|--------|-------|--------|-------|-------|-------|--------|-------|-------|-------|
| PLOD3     | -0.12  | 0.295 | -0.405 | 0.686 | 0.887 | 0.262 | -0.43  | 0.667 | 0.497 | 1.583 |
| PLOD2     | 0.33   | 0.3   | 1.099  | 0.272 | 1.391 | 0.418 | 0.936  | 0.349 | 0.772 | 2.505 |
| PLOD1     | -0.422 | 0.299 | -1.414 | 0.157 | 0.655 | 0.196 | -1.759 | 0.079 | 0.365 | 1.177 |
| PLN       | -0.921 | 0.321 | -2.871 | 0.004 | 0.398 | 0.128 | -4.712 | 0     | 0.212 | 0.747 |
| PLLP      | 0.002  | 0.296 | 0.008  | 0.994 | 1.002 | 0.297 | 0.008  | 0.994 | 0.561 | 1.79  |
| PLK4      | 0.666  | 0.306 | 2.179  | 0.029 | 1.946 | 0.595 | 1.591  | 0.112 | 1.069 | 3.543 |
| PLK3      | -0.174 | 0.296 | -0.588 | 0.556 | 0.84  | 0.249 | -0.642 | 0.521 | 0.47  | 1.501 |
| PLK2      | -0.488 | 0.302 | -1.614 | 0.107 | 0.614 | 0.186 | -2.08  | 0.038 | 0.339 | 1.11  |
| PLK1      | 0.671  | 0.306 | 2.19   | 0.029 | 1.956 | 0.599 | 1.596  | 0.111 | 1.073 | 3.564 |
| PLIN3     | -0.428 | 0.3   | -1.428 | 0.153 | 0.652 | 0.195 | -1.782 | 0.075 | 0.362 | 1.173 |
| PLIN2     | 0.599  | 0.306 | 1.955  | 0.051 | 1.82  | 0.557 | 1.471  | 0.141 | 0.999 | 3.317 |
| PLIN1     | 0.123  | 0.296 | 0.417  | 0.677 | 1.131 | 0.335 | 0.392  | 0.695 | 0.633 | 2.022 |
| PLGRKT    | -0.186 | 0.303 | -0.616 | 0.538 | 0.83  | 0.251 | -0.677 | 0.498 | 0.458 | 1.502 |
| PLG       | 0.405  | 0.298 | 1.359  | 0.174 | 1.5   | 0.448 | 1.117  | 0.264 | 0.836 | 2.693 |
| PLEKHS1   | 0.199  | 0.296 | 0.673  | 0.501 | 1.221 | 0.361 | 0.61   | 0.542 | 0.683 | 2.181 |
| PLEKHO2   | 0.251  | 0.298 | 0.842  | 0.4   | 1.286 | 0.384 | 0.744  | 0.457 | 0.716 | 2.307 |
| PLEKHO1   | -0.583 | 0.306 | -1.907 | 0.057 | 0.558 | 0.171 | -2.588 | 0.01  | 0.307 | 1.016 |
| PLEKHM2   | -0.348 | 0.3   | -1.161 | 0.246 | 0.706 | 0.212 | -1.388 | 0.165 | 0.393 | 1.27  |
| PLEKHM1   | 0.335  | 0.298 | 1.125  | 0.261 | 1.398 | 0.417 | 0.956  | 0.339 | 0.78  | 2.508 |
| PLEKHH3   | 0.23   | 0.296 | 0.778  | 0.437 | 1.259 | 0.373 | 0.695  | 0.487 | 0.705 | 2.25  |
| PLEKHG6   | 0.465  | 0.3   | 1.551  | 0.121 | 1.592 | 0.477 | 1.24   | 0.215 | 0.884 | 2.865 |
| PLEKHG3   | 0.292  | 0.297 | 0.982  | 0.326 | 1.339 | 0.398 | 0.852  | 0.394 | 0.748 | 2.398 |
| PLEKHF2   | -0.225 | 0.296 | -0.759 | 0.448 | 0.799 | 0.237 | -0.85  | 0.395 | 0.447 | 1.427 |
| PLEKHF1   | 0.196  | 0.301 | 0.652  | 0.514 | 1.217 | 0.366 | 0.592  | 0.554 | 0.675 | 2.193 |
| PLEKHB2   | -0.35  | 0.3   | -1.167 | 0.243 | 0.705 | 0.211 | -1.397 | 0.162 | 0.392 | 1.268 |
| PLEKHB1   | 0.166  | 0.295 | 0.562  | 0.574 | 1.181 | 0.349 | 0.518  | 0.605 | 0.662 | 2.106 |
| PLEKHA8P1 | -0.012 | 0.295 | -0.039 | 0.969 | 0.989 | 0.292 | -0.039 | 0.969 | 0.554 | 1.763 |
| PLEKHA6   | 0.139  | 0.295 | 0.47   | 0.639 | 1.149 | 0.339 | 0.439  | 0.661 | 0.644 | 2.049 |
| PLEKHA5   | 0.2    | 0.295 | 0.679  | 0.497 | 1.222 | 0.361 | 0.615  | 0.539 | 0.685 | 2.18  |
| PLEKHA4   | 0.128  | 0.295 | 0.435  | 0.664 | 1.137 | 0.336 | 0.408  | 0.683 | 0.637 | 2.029 |
| PLEKHA2   | 0.158  | 0.299 | 0.53   | 0.596 | 1.172 | 0.35  | 0.49   | 0.624 | 0.653 | 2.103 |
| PLEKHA1   | 0.034  | 0.295 | 0.117  | 0.907 | 1.035 | 0.305 | 0.115  | 0.909 | 0.581 | 1.845 |
| PLEK2     | 0.145  | 0.296 | 0.492  | 0.623 | 1.157 | 0.342 | 0.457  | 0.647 | 0.648 | 2.065 |
| PLEK      | -0.199 | 0.297 | -0.672 | 0.501 | 0.819 | 0.243 | -0.744 | 0.457 | 0.458 | 1.465 |
| PLEC      | 0.085  | 0.296 | 0.288  | 0.773 | 1.089 | 0.323 | 0.276  | 0.782 | 0.609 | 1.947 |
| PLD3      | -0.561 | 0.306 | -1.834 | 0.067 | 0.571 | 0.175 | -2.459 | 0.014 | 0.313 | 1.039 |
| PLD2      | -0.319 | 0.298 | -1.073 | 0.283 | 0.727 | 0.216 | -1.264 | 0.206 | 0.406 | 1.302 |
| PLD1      | -0.039 | 0.297 | -0.132 | 0.895 | 0.962 | 0.285 | -0.135 | 0.893 | 0.538 | 1.72  |

|         |        |       |        |       |       |       |        |       |       |       |
|---------|--------|-------|--------|-------|-------|-------|--------|-------|-------|-------|
| PLCXD1  | -0.075 | 0.296 | -0.255 | 0.799 | 0.927 | 0.274 | -0.265 | 0.791 | 0.519 | 1.656 |
| PLCL2   | -0.507 | 0.3   | -1.692 | 0.091 | 0.602 | 0.181 | -2.204 | 0.028 | 0.335 | 1.084 |
| PLCL1   | -0.097 | 0.297 | -0.327 | 0.744 | 0.908 | 0.269 | -0.343 | 0.732 | 0.507 | 1.624 |
| PLCH2   | 0.074  | 0.295 | 0.249  | 0.803 | 1.076 | 0.318 | 0.24   | 0.81  | 0.603 | 1.92  |
| PLCH1   | 0.618  | 0.31  | 1.994  | 0.046 | 1.856 | 0.575 | 1.487  | 0.137 | 1.011 | 3.408 |
| PLCG2   | -0.113 | 0.296 | -0.381 | 0.703 | 0.893 | 0.265 | -0.403 | 0.687 | 0.5   | 1.597 |
| PLCG1   | 0.632  | 0.31  | 2.036  | 0.042 | 1.881 | 0.584 | 1.509  | 0.131 | 1.024 | 3.457 |
| PLCE1   | 0.023  | 0.295 | 0.078  | 0.938 | 1.023 | 0.302 | 0.077  | 0.938 | 0.574 | 1.825 |
| PLCD1   | -0.15  | 0.295 | -0.509 | 0.611 | 0.86  | 0.254 | -0.549 | 0.583 | 0.482 | 1.535 |
| PLCB4   | -0.259 | 0.298 | -0.869 | 0.385 | 0.772 | 0.23  | -0.992 | 0.321 | 0.43  | 1.385 |
| PLCB3   | 0.604  | 0.306 | 1.978  | 0.048 | 1.83  | 0.559 | 1.484  | 0.138 | 1.005 | 3.331 |
| PLCB2   | -0.664 | 0.307 | -2.162 | 0.031 | 0.515 | 0.158 | -3.068 | 0.002 | 0.282 | 0.94  |
| PLCB1   | -0.022 | 0.296 | -0.076 | 0.94  | 0.978 | 0.289 | -0.077 | 0.939 | 0.548 | 1.746 |
| PLBD1   | 0.098  | 0.297 | 0.33   | 0.742 | 1.103 | 0.327 | 0.314  | 0.754 | 0.617 | 1.972 |
| PLAUR   | 0.019  | 0.295 | 0.064  | 0.949 | 1.019 | 0.301 | 0.063  | 0.949 | 0.571 | 1.817 |
| PLAU    | 0.218  | 0.296 | 0.736  | 0.461 | 1.244 | 0.369 | 0.662  | 0.508 | 0.696 | 2.224 |
| PLAT    | -0.964 | 0.328 | -2.938 | 0.003 | 0.381 | 0.125 | -4.943 | 0     | 0.201 | 0.726 |
| PLAGL2  | 0.842  | 0.315 | 2.674  | 0.008 | 2.32  | 0.73  | 1.808  | 0.071 | 1.252 | 4.3   |
| PLAGL1  | -0.402 | 0.3   | -1.339 | 0.18  | 0.669 | 0.201 | -1.648 | 0.099 | 0.372 | 1.204 |
| PLAG1   | -0.018 | 0.295 | -0.062 | 0.951 | 0.982 | 0.29  | -0.063 | 0.95  | 0.551 | 1.751 |
| PLAC8   | -0.578 | 0.306 | -1.89  | 0.059 | 0.561 | 0.172 | -2.558 | 0.011 | 0.308 | 1.022 |
| PLAC4   | 0.263  | 0.298 | 0.883  | 0.377 | 1.301 | 0.387 | 0.776  | 0.438 | 0.726 | 2.331 |
| PLAC1   | 0.059  | 0.295 | 0.2    | 0.842 | 1.061 | 0.313 | 0.194  | 0.846 | 0.595 | 1.891 |
| PLAAT4  | -0.032 | 0.297 | -0.107 | 0.915 | 0.969 | 0.288 | -0.109 | 0.914 | 0.541 | 1.735 |
| PLAAT3  | 0.546  | 0.301 | 1.815  | 0.07  | 1.726 | 0.519 | 1.399  | 0.162 | 0.957 | 3.112 |
| PLAAT2  | 0.084  | 0.295 | 0.284  | 0.777 | 1.087 | 0.321 | 0.272  | 0.785 | 0.61  | 1.94  |
| PLAAT1  | 0.722  | 0.306 | 2.357  | 0.018 | 2.058 | 0.631 | 1.678  | 0.093 | 1.129 | 3.752 |
| PLAA    | 0.851  | 0.312 | 2.731  | 0.006 | 2.341 | 0.729 | 1.839  | 0.066 | 1.272 | 4.312 |
| PLA2R1  | -0.095 | 0.296 | -0.322 | 0.748 | 0.909 | 0.269 | -0.338 | 0.736 | 0.509 | 1.625 |
| PLA2G7  | 0.692  | 0.307 | 2.257  | 0.024 | 1.998 | 0.612 | 1.629  | 0.103 | 1.095 | 3.643 |
| PLA2G6  | 0.187  | 0.302 | 0.619  | 0.536 | 1.206 | 0.364 | 0.564  | 0.572 | 0.667 | 2.18  |
| PLA2G5  | -0.348 | 0.298 | -1.168 | 0.243 | 0.706 | 0.21  | -1.397 | 0.162 | 0.394 | 1.266 |
| PLA2G4C | -0.283 | 0.3   | -0.946 | 0.344 | 0.753 | 0.226 | -1.093 | 0.274 | 0.419 | 1.355 |
| PLA2G4A | 0.057  | 0.295 | 0.193  | 0.847 | 1.059 | 0.313 | 0.187  | 0.851 | 0.593 | 1.888 |
| PLA2G3  | -0.275 | 0.3   | -0.918 | 0.358 | 0.759 | 0.228 | -1.057 | 0.29  | 0.422 | 1.366 |
| PLA2G2F | 0.427  | 0.302 | 1.412  | 0.158 | 1.532 | 0.463 | 1.15   | 0.25  | 0.847 | 2.771 |
| PLA2G2E | 0.002  | 0.295 | 0.006  | 0.996 | 1.002 | 0.296 | 0.006  | 0.996 | 0.561 | 1.787 |
| PLA2G2D | -0.447 | 0.299 | -1.493 | 0.135 | 0.64  | 0.191 | -1.883 | 0.06  | 0.356 | 1.15  |

|          |        |       |        |       |       |       |        |       |       |       |
|----------|--------|-------|--------|-------|-------|-------|--------|-------|-------|-------|
| PLA2G2A  | 0.328  | 0.298 | 1.102  | 0.27  | 1.388 | 0.413 | 0.94   | 0.347 | 0.775 | 2.487 |
| PLA2G1B  | -0.165 | 0.296 | -0.557 | 0.578 | 0.848 | 0.251 | -0.605 | 0.545 | 0.475 | 1.514 |
| PLA2G15  | -0.092 | 0.296 | -0.311 | 0.756 | 0.912 | 0.27  | -0.325 | 0.745 | 0.51  | 1.63  |
| PLA2G12A | 0.78   | 0.31  | 2.514  | 0.012 | 2.182 | 0.677 | 1.745  | 0.081 | 1.187 | 4.008 |
| PLA1A    | 0.104  | 0.295 | 0.354  | 0.723 | 1.11  | 0.328 | 0.336  | 0.737 | 0.622 | 1.98  |
| PKP4     | 0.305  | 0.298 | 1.026  | 0.305 | 1.357 | 0.404 | 0.884  | 0.377 | 0.757 | 2.432 |
| PKP3     | -0.126 | 0.296 | -0.424 | 0.671 | 0.882 | 0.261 | -0.452 | 0.651 | 0.494 | 1.576 |
| PKP2     | -0.243 | 0.297 | -0.819 | 0.413 | 0.784 | 0.233 | -0.927 | 0.354 | 0.439 | 1.402 |
| PKP1     | -0.3   | 0.298 | -1.006 | 0.315 | 0.741 | 0.221 | -1.173 | 0.241 | 0.413 | 1.329 |
| PKNOX2   | 0.134  | 0.296 | 0.455  | 0.649 | 1.144 | 0.338 | 0.425  | 0.671 | 0.641 | 2.041 |
| PKNOX1   | -0.073 | 0.297 | -0.245 | 0.807 | 0.93  | 0.276 | -0.254 | 0.8   | 0.52  | 1.664 |
| PKN2     | 0.167  | 0.296 | 0.567  | 0.571 | 1.182 | 0.35  | 0.522  | 0.602 | 0.662 | 2.11  |
| PKN1     | -0.653 | 0.306 | -2.137 | 0.033 | 0.52  | 0.159 | -3.016 | 0.003 | 0.286 | 0.947 |
| PKMYT1   | 0.48   | 0.303 | 1.586  | 0.113 | 1.616 | 0.489 | 1.26   | 0.208 | 0.893 | 2.925 |
| PKM      | -0.091 | 0.296 | -0.308 | 0.758 | 0.913 | 0.27  | -0.323 | 0.747 | 0.511 | 1.632 |
| PKLR     | 0.227  | 0.297 | 0.765  | 0.445 | 1.254 | 0.372 | 0.684  | 0.494 | 0.702 | 2.243 |
| PKIG     | -0.06  | 0.297 | -0.203 | 0.839 | 0.941 | 0.28  | -0.209 | 0.834 | 0.526 | 1.685 |
| PKIA     | -0.263 | 0.297 | -0.886 | 0.375 | 0.769 | 0.228 | -1.014 | 0.311 | 0.43  | 1.375 |
| PKDREJ   | -0.1   | 0.295 | -0.339 | 0.734 | 0.905 | 0.267 | -0.357 | 0.721 | 0.507 | 1.614 |
| PKD2L2   | -0.298 | 0.298 | -1     | 0.317 | 0.742 | 0.221 | -1.165 | 0.244 | 0.414 | 1.331 |
| PKD2L1   | 0.481  | 0.3   | 1.604  | 0.109 | 1.617 | 0.485 | 1.273  | 0.203 | 0.899 | 2.91  |
| PKD2     | -0.834 | 0.311 | -2.683 | 0.007 | 0.434 | 0.135 | -4.19  | 0     | 0.236 | 0.799 |
| PJA2     | -0.74  | 0.315 | -2.352 | 0.019 | 0.477 | 0.15  | -3.484 | 0     | 0.257 | 0.884 |
| PJA1     | 0.833  | 0.313 | 2.665  | 0.008 | 2.3   | 0.719 | 1.808  | 0.071 | 1.247 | 4.245 |
| PIWIL2   | -0.132 | 0.296 | -0.447 | 0.655 | 0.876 | 0.259 | -0.478 | 0.633 | 0.49  | 1.566 |
| PIWIL1   | 0.113  | 0.295 | 0.381  | 0.703 | 1.119 | 0.33  | 0.36   | 0.719 | 0.627 | 1.996 |
| PITX3    | -0.229 | 0.296 | -0.773 | 0.44  | 0.795 | 0.236 | -0.868 | 0.385 | 0.445 | 1.422 |
| PITX2    | -0.405 | 0.3   | -1.353 | 0.176 | 0.667 | 0.2   | -1.669 | 0.095 | 0.371 | 1.199 |
| PITX1    | 0.45   | 0.3   | 1.5    | 0.134 | 1.569 | 0.471 | 1.208  | 0.227 | 0.871 | 2.825 |
| PITRM1   | 0.189  | 0.296 | 0.638  | 0.523 | 1.208 | 0.358 | 0.581  | 0.561 | 0.676 | 2.16  |
| PITPNM3  | 0.257  | 0.298 | 0.862  | 0.389 | 1.293 | 0.385 | 0.76   | 0.447 | 0.721 | 2.318 |
| PITPNM1  | 0.628  | 0.31  | 2.024  | 0.043 | 1.873 | 0.581 | 1.503  | 0.133 | 1.02  | 3.44  |
| PITPNC1  | 0.404  | 0.299 | 1.349  | 0.177 | 1.498 | 0.448 | 1.11   | 0.267 | 0.833 | 2.693 |
| PITPNB   | -0.315 | 0.297 | -1.061 | 0.289 | 0.729 | 0.217 | -1.247 | 0.212 | 0.407 | 1.307 |
| PITPNA   | -0.129 | 0.296 | -0.435 | 0.663 | 0.879 | 0.26  | -0.465 | 0.642 | 0.493 | 1.569 |
| PIR      | 0.575  | 0.302 | 1.901  | 0.057 | 1.777 | 0.537 | 1.446  | 0.148 | 0.982 | 3.213 |
| PIPOX    | 0.354  | 0.298 | 1.187  | 0.235 | 1.424 | 0.425 | 1      | 0.318 | 0.794 | 2.555 |
| PIP5K1C  | -0.573 | 0.306 | -1.875 | 0.061 | 0.564 | 0.172 | -2.531 | 0.011 | 0.309 | 1.026 |

|         |        |       |        |       |       |       |        |       |       |       |
|---------|--------|-------|--------|-------|-------|-------|--------|-------|-------|-------|
| PIP5K1B | 0.152  | 0.298 | 0.51   | 0.61  | 1.164 | 0.347 | 0.474  | 0.636 | 0.649 | 2.089 |
| PIP5K1A | 0.255  | 0.298 | 0.856  | 0.392 | 1.291 | 0.385 | 0.755  | 0.45  | 0.719 | 2.315 |
| PIP4K2C | 0.5    | 0.3   | 1.667  | 0.095 | 1.648 | 0.494 | 1.312  | 0.189 | 0.916 | 2.965 |
| PIP4K2B | -0.07  | 0.296 | -0.237 | 0.813 | 0.932 | 0.276 | -0.245 | 0.806 | 0.522 | 1.666 |
| PIP4K2A | -0.793 | 0.315 | -2.516 | 0.012 | 0.452 | 0.143 | -3.84  | 0     | 0.244 | 0.839 |
| PIP     | -0.45  | 0.302 | -1.487 | 0.137 | 0.638 | 0.193 | -1.878 | 0.06  | 0.353 | 1.154 |
| PINLYP  | -0.166 | 0.295 | -0.562 | 0.574 | 0.847 | 0.25  | -0.611 | 0.541 | 0.475 | 1.511 |
| PINK1   | -0.536 | 0.306 | -1.751 | 0.08  | 0.585 | 0.179 | -2.317 | 0.021 | 0.321 | 1.066 |
| PIN4    | 0.72   | 0.31  | 2.322  | 0.02  | 2.053 | 0.636 | 1.655  | 0.098 | 1.119 | 3.769 |
| PIN1P1  | 0.572  | 0.304 | 1.882  | 0.06  | 1.772 | 0.539 | 1.433  | 0.152 | 0.977 | 3.216 |
| PIN1    | 0.315  | 0.297 | 1.061  | 0.289 | 1.37  | 0.407 | 0.91   | 0.363 | 0.766 | 2.451 |
| PIMREG  | 0.774  | 0.31  | 2.499  | 0.012 | 2.168 | 0.672 | 1.739  | 0.082 | 1.182 | 3.98  |
| PIM2    | -0.157 | 0.296 | -0.529 | 0.597 | 0.855 | 0.253 | -0.573 | 0.567 | 0.478 | 1.528 |
| PIM1    | 0.004  | 0.296 | 0.015  | 0.988 | 1.004 | 0.297 | 0.015  | 0.988 | 0.563 | 1.793 |
| PILRA   | 0.062  | 0.295 | 0.21   | 0.834 | 1.064 | 0.314 | 0.203  | 0.839 | 0.597 | 1.897 |
| PIKFYVE | -0.528 | 0.306 | -1.726 | 0.084 | 0.59  | 0.18  | -2.273 | 0.023 | 0.324 | 1.074 |
| PIK3R5  | -0.304 | 0.297 | -1.024 | 0.306 | 0.738 | 0.219 | -1.197 | 0.231 | 0.412 | 1.32  |
| PIK3R4  | 0.383  | 0.3   | 1.277  | 0.202 | 1.466 | 0.439 | 1.061  | 0.289 | 0.815 | 2.638 |
| PIK3R3  | -0.022 | 0.295 | -0.075 | 0.94  | 0.978 | 0.289 | -0.076 | 0.939 | 0.549 | 1.744 |
| PIK3R2  | -0.607 | 0.306 | -1.985 | 0.047 | 0.545 | 0.167 | -2.73  | 0.006 | 0.3   | 0.992 |
| PIK3R1  | -0.62  | 0.31  | -2.002 | 0.045 | 0.538 | 0.167 | -2.774 | 0.006 | 0.293 | 0.987 |
| PIK3IP1 | 0.201  | 0.296 | 0.68   | 0.497 | 1.223 | 0.361 | 0.616  | 0.538 | 0.685 | 2.182 |
| PIK3CG  | -0.253 | 0.296 | -0.854 | 0.393 | 0.776 | 0.23  | -0.972 | 0.331 | 0.434 | 1.388 |
| PIK3CD  | -0.291 | 0.298 | -0.978 | 0.328 | 0.747 | 0.223 | -1.136 | 0.256 | 0.417 | 1.34  |
| PIK3CB  | 0.253  | 0.298 | 0.851  | 0.395 | 1.288 | 0.384 | 0.751  | 0.452 | 0.719 | 2.309 |
| PIK3CA  | 0.15   | 0.296 | 0.508  | 0.611 | 1.162 | 0.344 | 0.472  | 0.637 | 0.651 | 2.075 |
| PIK3C3  | -0.776 | 0.321 | -2.42  | 0.016 | 0.46  | 0.148 | -3.659 | 0     | 0.245 | 0.863 |
| PIK3C2G | -0.579 | 0.304 | -1.904 | 0.057 | 0.561 | 0.17  | -2.579 | 0.01  | 0.309 | 1.017 |
| PIK3C2B | 0.312  | 0.3   | 1.041  | 0.298 | 1.366 | 0.41  | 0.894  | 0.371 | 0.759 | 2.458 |
| PIK3C2A | -0.373 | 0.3   | -1.246 | 0.213 | 0.688 | 0.206 | -1.511 | 0.131 | 0.383 | 1.238 |
| PIH1D1  | 0.159  | 0.296 | 0.535  | 0.592 | 1.172 | 0.347 | 0.495  | 0.621 | 0.656 | 2.094 |
| PIGZ    | 0.446  | 0.3   | 1.488  | 0.137 | 1.562 | 0.468 | 1.2    | 0.23  | 0.868 | 2.81  |
| PIGV    | -0.234 | 0.298 | -0.785 | 0.433 | 0.791 | 0.236 | -0.884 | 0.377 | 0.441 | 1.42  |
| PIGT    | -0.077 | 0.296 | -0.262 | 0.793 | 0.925 | 0.274 | -0.273 | 0.785 | 0.518 | 1.652 |
| PIGR    | -0.142 | 0.295 | -0.48  | 0.631 | 0.868 | 0.256 | -0.515 | 0.606 | 0.486 | 1.549 |
| PIGQ    | -0.006 | 0.296 | -0.021 | 0.984 | 0.994 | 0.294 | -0.021 | 0.983 | 0.556 | 1.776 |
| PIGP    | -0.076 | 0.298 | -0.254 | 0.8   | 0.927 | 0.276 | -0.264 | 0.792 | 0.517 | 1.662 |
| PIGO    | -0.216 | 0.297 | -0.729 | 0.466 | 0.806 | 0.239 | -0.814 | 0.416 | 0.45  | 1.44  |

|        |        |       |        |       |       |       |        |       |       |       |
|--------|--------|-------|--------|-------|-------|-------|--------|-------|-------|-------|
| PIGN   | -0.251 | 0.3   | -0.839 | 0.402 | 0.778 | 0.233 | -0.953 | 0.34  | 0.432 | 1.4   |
| PIGL   | 0.286  | 0.299 | 0.957  | 0.338 | 1.331 | 0.397 | 0.833  | 0.405 | 0.741 | 2.389 |
| PIGK   | -0.147 | 0.301 | -0.489 | 0.625 | 0.863 | 0.26  | -0.527 | 0.598 | 0.478 | 1.558 |
| PIGH   | -0.154 | 0.298 | -0.516 | 0.606 | 0.857 | 0.256 | -0.558 | 0.577 | 0.478 | 1.538 |
| PIGG   | -0.29  | 0.298 | -0.975 | 0.329 | 0.748 | 0.223 | -1.132 | 0.258 | 0.417 | 1.341 |
| PIGF   | -0.487 | 0.303 | -1.607 | 0.108 | 0.615 | 0.186 | -2.071 | 0.038 | 0.34  | 1.113 |
| PIGC   | 0.505  | 0.3   | 1.683  | 0.092 | 1.657 | 0.497 | 1.321  | 0.186 | 0.92  | 2.982 |
| PIGB   | -0.131 | 0.3   | -0.436 | 0.663 | 0.878 | 0.263 | -0.466 | 0.642 | 0.488 | 1.579 |
| PIGA   | 0.209  | 0.296 | 0.705  | 0.481 | 1.232 | 0.365 | 0.637  | 0.524 | 0.69  | 2.202 |
| PIEZO2 | -0.811 | 0.315 | -2.577 | 0.01  | 0.444 | 0.14  | -3.972 | 0     | 0.24  | 0.824 |
| PIEZO1 | 0.386  | 0.3   | 1.286  | 0.198 | 1.471 | 0.441 | 1.067  | 0.286 | 0.817 | 2.649 |
| PIDD1  | 0.375  | 0.299 | 1.257  | 0.209 | 1.456 | 0.434 | 1.048  | 0.294 | 0.811 | 2.613 |
| PID1   | -0.621 | 0.303 | -2.045 | 0.041 | 0.538 | 0.163 | -2.834 | 0.005 | 0.297 | 0.974 |
| PICK1  | 0.291  | 0.298 | 0.98   | 0.327 | 1.338 | 0.398 | 0.85   | 0.395 | 0.747 | 2.398 |
| PICALM | -0.507 | 0.304 | -1.668 | 0.095 | 0.602 | 0.183 | -2.173 | 0.03  | 0.332 | 1.093 |
| PIBF1  | 0.117  | 0.296 | 0.397  | 0.691 | 1.125 | 0.333 | 0.375  | 0.708 | 0.63  | 2.008 |
| PIAS4  | 0.027  | 0.296 | 0.092  | 0.927 | 1.028 | 0.304 | 0.091  | 0.928 | 0.575 | 1.836 |
| PIAS3  | -0.102 | 0.295 | -0.345 | 0.73  | 0.903 | 0.267 | -0.363 | 0.716 | 0.506 | 1.611 |
| PIAS2  | 0.004  | 0.296 | 0.013  | 0.99  | 1.004 | 0.298 | 0.013  | 0.99  | 0.562 | 1.795 |
| PIAS1  | 0.416  | 0.299 | 1.393  | 0.164 | 1.516 | 0.453 | 1.139  | 0.255 | 0.844 | 2.723 |
| PI4KB  | -0.538 | 0.301 | -1.785 | 0.074 | 0.584 | 0.176 | -2.365 | 0.018 | 0.324 | 1.054 |
| PI4KA  | -0.658 | 0.308 | -2.138 | 0.033 | 0.518 | 0.159 | -3.025 | 0.002 | 0.283 | 0.947 |
| PI4K2A | -0.065 | 0.295 | -0.22  | 0.826 | 0.937 | 0.277 | -0.227 | 0.82  | 0.525 | 1.672 |
| PI3    | 0.029  | 0.295 | 0.097  | 0.923 | 1.029 | 0.304 | 0.096  | 0.924 | 0.577 | 1.835 |
| PI15   | -0.414 | 0.302 | -1.37  | 0.171 | 0.661 | 0.2   | -1.697 | 0.09  | 0.366 | 1.195 |
| PHYHIP | 0.181  | 0.296 | 0.61   | 0.542 | 1.198 | 0.355 | 0.558  | 0.577 | 0.67  | 2.141 |
| PHYH   | 0.291  | 0.297 | 0.981  | 0.327 | 1.338 | 0.397 | 0.851  | 0.395 | 0.748 | 2.392 |
| PHTF2  | -0.113 | 0.296 | -0.381 | 0.703 | 0.893 | 0.265 | -0.403 | 0.687 | 0.5   | 1.596 |
| PHTF1  | -0.602 | 0.31  | -1.944 | 0.052 | 0.548 | 0.17  | -2.667 | 0.008 | 0.298 | 1.005 |
| PHOX2B | -0.486 | 0.302 | -1.609 | 0.108 | 0.615 | 0.186 | -2.071 | 0.038 | 0.34  | 1.112 |
| PHOX2A | 0.036  | 0.295 | 0.121  | 0.904 | 1.036 | 0.306 | 0.119  | 0.906 | 0.581 | 1.848 |
| PHLPP2 | 0.493  | 0.3   | 1.646  | 0.1   | 1.637 | 0.491 | 1.299  | 0.194 | 0.91  | 2.945 |
| PHLPP1 | -0.277 | 0.298 | -0.931 | 0.352 | 0.758 | 0.226 | -1.072 | 0.284 | 0.423 | 1.359 |
| PHLDB1 | -0.457 | 0.303 | -1.509 | 0.131 | 0.633 | 0.192 | -1.913 | 0.056 | 0.35  | 1.146 |
| PHLDA3 | 0.038  | 0.298 | 0.128  | 0.898 | 1.039 | 0.31  | 0.126  | 0.9   | 0.579 | 1.864 |
| PHLDA2 | 0.24   | 0.296 | 0.81   | 0.418 | 1.271 | 0.376 | 0.72   | 0.472 | 0.711 | 2.27  |
| PHLDA1 | 0.286  | 0.298 | 0.962  | 0.336 | 1.332 | 0.397 | 0.836  | 0.403 | 0.743 | 2.388 |
| PHKG2  | -0.131 | 0.296 | -0.442 | 0.658 | 0.877 | 0.26  | -0.473 | 0.636 | 0.491 | 1.568 |

|         |        |       |        |       |       |       |        |       |       |       |
|---------|--------|-------|--------|-------|-------|-------|--------|-------|-------|-------|
| PHKG1   | -0.146 | 0.295 | -0.496 | 0.62  | 0.864 | 0.255 | -0.534 | 0.593 | 0.484 | 1.541 |
| PHKB    | -0.157 | 0.296 | -0.529 | 0.597 | 0.855 | 0.253 | -0.572 | 0.567 | 0.479 | 1.528 |
| PHKA2   | -0.16  | 0.296 | -0.541 | 0.589 | 0.852 | 0.253 | -0.587 | 0.557 | 0.476 | 1.523 |
| PHKA1   | 0.079  | 0.295 | 0.268  | 0.789 | 1.082 | 0.319 | 0.257  | 0.797 | 0.607 | 1.929 |
| PHIP    | -0.105 | 0.295 | -0.355 | 0.723 | 0.901 | 0.266 | -0.374 | 0.709 | 0.505 | 1.606 |
| PHGDH   | 0.452  | 0.302 | 1.495  | 0.135 | 1.572 | 0.475 | 1.203  | 0.229 | 0.869 | 2.844 |
| PHF8    | 0.004  | 0.295 | 0.013  | 0.99  | 1.004 | 0.296 | 0.013  | 0.99  | 0.563 | 1.79  |
| PHF7    | -0.183 | 0.297 | -0.617 | 0.537 | 0.833 | 0.247 | -0.678 | 0.498 | 0.465 | 1.49  |
| PHF3    | 0.289  | 0.3   | 0.964  | 0.335 | 1.336 | 0.401 | 0.837  | 0.402 | 0.742 | 2.406 |
| PHF24   | -0.104 | 0.296 | -0.351 | 0.725 | 0.901 | 0.266 | -0.37  | 0.711 | 0.505 | 1.609 |
| PHF21A  | -0.011 | 0.295 | -0.038 | 0.97  | 0.989 | 0.292 | -0.038 | 0.97  | 0.554 | 1.764 |
| PHF20L1 | 0.763  | 0.315 | 2.422  | 0.015 | 2.144 | 0.675 | 1.694  | 0.09  | 1.156 | 3.974 |
| PHF20   | 0.022  | 0.296 | 0.074  | 0.941 | 1.022 | 0.302 | 0.073  | 0.941 | 0.572 | 1.826 |
| PHF2    | -0.497 | 0.301 | -1.653 | 0.098 | 0.608 | 0.183 | -2.142 | 0.032 | 0.338 | 1.096 |
| PHF14   | 0.178  | 0.296 | 0.6    | 0.549 | 1.194 | 0.354 | 0.55   | 0.583 | 0.669 | 2.134 |
| PHF11   | -0.118 | 0.297 | -0.399 | 0.69  | 0.888 | 0.264 | -0.423 | 0.672 | 0.497 | 1.589 |
| PHF10   | 0.216  | 0.298 | 0.727  | 0.467 | 1.241 | 0.369 | 0.654  | 0.513 | 0.693 | 2.225 |
| PHF1    | -0.427 | 0.299 | -1.428 | 0.153 | 0.652 | 0.195 | -1.781 | 0.075 | 0.363 | 1.173 |
| PHFX    | -0.09  | 0.296 | -0.302 | 0.762 | 0.914 | 0.271 | -0.316 | 0.752 | 0.511 | 1.635 |
| PHC3    | 0.432  | 0.3   | 1.439  | 0.15  | 1.54  | 0.462 | 1.169  | 0.243 | 0.855 | 2.771 |
| PHC2    | -0.162 | 0.295 | -0.549 | 0.583 | 0.85  | 0.251 | -0.595 | 0.552 | 0.477 | 1.517 |
| PHC1    | -1.045 | 0.328 | -3.184 | 0.001 | 0.352 | 0.115 | -5.616 | 0     | 0.185 | 0.669 |
| PHB2    | 0.015  | 0.295 | 0.05   | 0.96  | 1.015 | 0.3   | 0.05   | 0.96  | 0.569 | 1.81  |
| PHB     | 0.363  | 0.3   | 1.212  | 0.226 | 1.438 | 0.431 | 1.016  | 0.31  | 0.799 | 2.586 |
| PHACTR4 | -0.171 | 0.296 | -0.579 | 0.562 | 0.842 | 0.249 | -0.632 | 0.527 | 0.472 | 1.504 |
| PHACTR2 | -0.481 | 0.3   | -1.603 | 0.109 | 0.618 | 0.185 | -2.058 | 0.04  | 0.344 | 1.113 |
| PHACTR1 | 0.046  | 0.296 | 0.156  | 0.876 | 1.047 | 0.309 | 0.153  | 0.878 | 0.587 | 1.869 |
| PGS1    | 0.499  | 0.302 | 1.651  | 0.099 | 1.647 | 0.498 | 1.3    | 0.194 | 0.911 | 2.978 |
| PGRMC2  | -0.418 | 0.302 | -1.381 | 0.167 | 0.659 | 0.199 | -1.715 | 0.086 | 0.364 | 1.191 |
| PGRMC1  | 0.372  | 0.3   | 1.242  | 0.214 | 1.451 | 0.435 | 1.037  | 0.3   | 0.806 | 2.61  |
| PGR     | -0.591 | 0.31  | -1.905 | 0.057 | 0.554 | 0.172 | -2.598 | 0.009 | 0.302 | 1.017 |
| PGPEP1  | 0.211  | 0.298 | 0.71   | 0.478 | 1.235 | 0.368 | 0.64   | 0.522 | 0.689 | 2.214 |
| PGP     | -0.113 | 0.295 | -0.382 | 0.702 | 0.893 | 0.264 | -0.404 | 0.686 | 0.501 | 1.594 |
| PGM5    | 0.26   | 0.297 | 0.876  | 0.381 | 1.297 | 0.385 | 0.772  | 0.44  | 0.725 | 2.32  |
| PGM3    | -0.358 | 0.3   | -1.195 | 0.232 | 0.699 | 0.21  | -1.437 | 0.151 | 0.388 | 1.258 |
| PGM1    | 0.146  | 0.296 | 0.492  | 0.623 | 1.157 | 0.342 | 0.458  | 0.647 | 0.648 | 2.064 |
| PGLYRP4 | -0.062 | 0.297 | -0.21  | 0.834 | 0.94  | 0.279 | -0.216 | 0.829 | 0.525 | 1.681 |
| PGLYRP1 | 0.095  | 0.296 | 0.32   | 0.749 | 1.099 | 0.325 | 0.305  | 0.76  | 0.616 | 1.962 |

|        |        |       |        |       |       |       |        |       |       |       |
|--------|--------|-------|--------|-------|-------|-------|--------|-------|-------|-------|
| PGLS   | 0.442  | 0.3   | 1.472  | 0.141 | 1.555 | 0.467 | 1.19   | 0.234 | 0.864 | 2.8   |
| PGK2   | 0.36   | 0.298 | 1.207  | 0.227 | 1.433 | 0.427 | 1.014  | 0.311 | 0.799 | 2.571 |
| PGK1   | 1.096  | 0.328 | 3.345  | 0.001 | 2.994 | 0.981 | 2.032  | 0.042 | 1.575 | 5.691 |
| PGGT1B | 0.331  | 0.298 | 1.111  | 0.266 | 1.393 | 0.415 | 0.946  | 0.344 | 0.776 | 2.499 |
| PGGHG  | 0.177  | 0.296 | 0.597  | 0.551 | 1.193 | 0.353 | 0.547  | 0.584 | 0.668 | 2.132 |
| PGF    | 0.274  | 0.304 | 0.9    | 0.368 | 1.315 | 0.4   | 0.788  | 0.431 | 0.724 | 2.387 |
| PGD    | -0.824 | 0.321 | -2.568 | 0.01  | 0.439 | 0.141 | -3.987 | 0     | 0.234 | 0.823 |
| PGC    | -0.054 | 0.297 | -0.181 | 0.857 | 0.948 | 0.281 | -0.186 | 0.853 | 0.53  | 1.695 |
| PGBD5  | -0.001 | 0.295 | -0.005 | 0.996 | 0.999 | 0.295 | -0.005 | 0.996 | 0.56  | 1.78  |
| PGAP6  | 0.12   | 0.296 | 0.404  | 0.686 | 1.127 | 0.333 | 0.381  | 0.703 | 0.631 | 2.013 |
| PGAP4  | -0.009 | 0.295 | -0.031 | 0.975 | 0.991 | 0.292 | -0.031 | 0.975 | 0.556 | 1.767 |
| PGAP3  | 0.492  | 0.303 | 1.627  | 0.104 | 1.636 | 0.495 | 1.285  | 0.199 | 0.904 | 2.961 |
| PGAP2  | 0.139  | 0.296 | 0.47   | 0.638 | 1.15  | 0.341 | 0.439  | 0.661 | 0.643 | 2.055 |
| PGAP1  | 0.18   | 0.296 | 0.606  | 0.544 | 1.197 | 0.354 | 0.555  | 0.579 | 0.67  | 2.139 |
| PGAM2  | 0.343  | 0.298 | 1.152  | 0.249 | 1.409 | 0.42  | 0.975  | 0.329 | 0.786 | 2.527 |
| PGAM1  | 0.471  | 0.3   | 1.571  | 0.116 | 1.601 | 0.48  | 1.253  | 0.21  | 0.89  | 2.881 |
| PFN2   | 0.615  | 0.306 | 2.013  | 0.044 | 1.85  | 0.565 | 1.503  | 0.133 | 1.016 | 3.367 |
| PFN1   | -0.014 | 0.295 | -0.046 | 0.963 | 0.986 | 0.291 | -0.047 | 0.963 | 0.553 | 1.759 |
| PFKP   | 0.257  | 0.296 | 0.867  | 0.386 | 1.293 | 0.383 | 0.765  | 0.445 | 0.723 | 2.31  |
| PFKM   | 0.534  | 0.306 | 1.747  | 0.081 | 1.706 | 0.521 | 1.354  | 0.176 | 0.937 | 3.105 |
| PFKL   | 0.559  | 0.306 | 1.828  | 0.068 | 1.749 | 0.535 | 1.4    | 0.161 | 0.96  | 3.185 |
| PFKFB4 | -0.231 | 0.3   | -0.771 | 0.441 | 0.794 | 0.238 | -0.868 | 0.386 | 0.441 | 1.428 |
| PFKFB3 | 0.751  | 0.307 | 2.446  | 0.014 | 2.12  | 0.651 | 1.72   | 0.086 | 1.161 | 3.87  |
| PFKFB2 | 0.014  | 0.295 | 0.047  | 0.962 | 1.014 | 0.299 | 0.047  | 0.963 | 0.569 | 1.808 |
| PFKFB1 | 0.443  | 0.3   | 1.479  | 0.139 | 1.558 | 0.467 | 1.195  | 0.232 | 0.866 | 2.802 |
| PFDN5  | -0.392 | 0.3   | -1.307 | 0.191 | 0.676 | 0.203 | -1.601 | 0.109 | 0.376 | 1.216 |
| PFDN4  | 0.403  | 0.3   | 1.343  | 0.179 | 1.496 | 0.448 | 1.105  | 0.269 | 0.831 | 2.692 |
| PFDN2  | 0.589  | 0.306 | 1.924  | 0.054 | 1.802 | 0.552 | 1.454  | 0.146 | 0.989 | 3.283 |
| PFDN1  | 0.27   | 0.298 | 0.907  | 0.365 | 1.31  | 0.39  | 0.794  | 0.427 | 0.731 | 2.349 |
| PFAS   | 0.565  | 0.303 | 1.867  | 0.062 | 1.759 | 0.532 | 1.426  | 0.154 | 0.972 | 3.183 |
| PF4V1  | 0.454  | 0.299 | 1.518  | 0.129 | 1.575 | 0.471 | 1.22   | 0.222 | 0.876 | 2.831 |
| PF4    | -0.614 | 0.306 | -2.007 | 0.045 | 0.541 | 0.166 | -2.771 | 0.006 | 0.297 | 0.986 |
| PEX7   | -0.501 | 0.306 | -1.636 | 0.102 | 0.606 | 0.185 | -2.124 | 0.034 | 0.333 | 1.104 |
| PEX6   | 0.102  | 0.295 | 0.346  | 0.73  | 1.107 | 0.327 | 0.328  | 0.743 | 0.621 | 1.976 |
| PEX5L  | 0.001  | 0.295 | 0.003  | 0.998 | 1.001 | 0.295 | 0.003  | 0.998 | 0.561 | 1.785 |
| PEX5   | 0.028  | 0.295 | 0.096  | 0.924 | 1.029 | 0.304 | 0.094  | 0.925 | 0.577 | 1.834 |
| PEX3   | -0.391 | 0.3   | -1.301 | 0.193 | 0.677 | 0.203 | -1.592 | 0.111 | 0.376 | 1.218 |
| PEX26  | 0.275  | 0.298 | 0.925  | 0.355 | 1.317 | 0.392 | 0.809  | 0.419 | 0.735 | 2.36  |



|          |        |       |        |       |       |       |        |       |       |       |
|----------|--------|-------|--------|-------|-------|-------|--------|-------|-------|-------|
| PEX2     | -0.768 | 0.315 | -2.439 | 0.015 | 0.464 | 0.146 | -3.669 | 0     | 0.25  | 0.86  |
| PEX19    | -0.269 | 0.3   | -0.897 | 0.369 | 0.764 | 0.229 | -1.03  | 0.303 | 0.424 | 1.376 |
| PEX16    | 0.212  | 0.298 | 0.712  | 0.476 | 1.236 | 0.368 | 0.642  | 0.521 | 0.69  | 2.215 |
| PEX14    | -0.382 | 0.299 | -1.281 | 0.2   | 0.682 | 0.204 | -1.56  | 0.119 | 0.38  | 1.225 |
| PEX13    | 0.358  | 0.298 | 1.201  | 0.23  | 1.43  | 0.425 | 1.01   | 0.312 | 0.798 | 2.562 |
| PEX12    | -0.375 | 0.3   | -1.25  | 0.211 | 0.688 | 0.206 | -1.516 | 0.129 | 0.382 | 1.237 |
| PEX11B   | -0.57  | 0.306 | -1.866 | 0.062 | 0.565 | 0.173 | -2.515 | 0.012 | 0.311 | 1.029 |
| PEX11A   | 0.005  | 0.297 | 0.017  | 0.986 | 1.005 | 0.298 | 0.017  | 0.986 | 0.562 | 1.798 |
| PEX10    | -0.548 | 0.31  | -1.768 | 0.077 | 0.578 | 0.179 | -2.355 | 0.019 | 0.315 | 1.061 |
| PEX1     | -0.762 | 0.315 | -2.423 | 0.015 | 0.467 | 0.147 | -3.633 | 0     | 0.252 | 0.864 |
| PES1     | 0.447  | 0.3   | 1.49   | 0.136 | 1.563 | 0.468 | 1.202  | 0.229 | 0.869 | 2.812 |
| PERP     | -0.321 | 0.298 | -1.077 | 0.281 | 0.726 | 0.216 | -1.27  | 0.204 | 0.405 | 1.301 |
| PER3     | -0.349 | 0.3   | -1.162 | 0.245 | 0.706 | 0.212 | -1.39  | 0.165 | 0.392 | 1.271 |
| PER2     | -0.222 | 0.296 | -0.75  | 0.453 | 0.801 | 0.237 | -0.839 | 0.401 | 0.448 | 1.431 |
| PEPD     | 0.513  | 0.3   | 1.709  | 0.088 | 1.67  | 0.502 | 1.337  | 0.181 | 0.927 | 3.009 |
| PENK     | 0.199  | 0.299 | 0.664  | 0.507 | 1.22  | 0.365 | 0.602  | 0.547 | 0.679 | 2.192 |
| PEMT     | 0.469  | 0.299 | 1.566  | 0.117 | 1.598 | 0.479 | 1.25   | 0.211 | 0.889 | 2.874 |
| PELP1    | 0.733  | 0.306 | 2.395  | 0.017 | 2.082 | 0.637 | 1.697  | 0.09  | 1.142 | 3.793 |
| PELO     | 0.394  | 0.298 | 1.322  | 0.186 | 1.484 | 0.443 | 1.092  | 0.275 | 0.827 | 2.663 |
| PELI2    | -0.266 | 0.296 | -0.897 | 0.37  | 0.767 | 0.227 | -1.027 | 0.304 | 0.429 | 1.37  |
| PELI1    | -0.422 | 0.3   | -1.407 | 0.16  | 0.656 | 0.197 | -1.75  | 0.08  | 0.364 | 1.181 |
| PEG3     | -0.321 | 0.298 | -1.077 | 0.281 | 0.725 | 0.216 | -1.271 | 0.204 | 0.404 | 1.301 |
| PEG10    | -0.186 | 0.295 | -0.629 | 0.529 | 0.83  | 0.245 | -0.692 | 0.489 | 0.465 | 1.482 |
| PEF1     | -0.941 | 0.321 | -2.936 | 0.003 | 0.39  | 0.125 | -4.877 | 0     | 0.208 | 0.731 |
| PECR     | -0.176 | 0.298 | -0.59  | 0.555 | 0.839 | 0.25  | -0.646 | 0.519 | 0.467 | 1.505 |
| PECAM1   | -0.261 | 0.296 | -0.881 | 0.378 | 0.77  | 0.228 | -1.007 | 0.314 | 0.431 | 1.376 |
| PEBP1    | -0.236 | 0.298 | -0.793 | 0.428 | 0.79  | 0.235 | -0.894 | 0.371 | 0.441 | 1.415 |
| PEAK1    | 0.423  | 0.298 | 1.418  | 0.156 | 1.526 | 0.455 | 1.156  | 0.248 | 0.851 | 2.739 |
| PEA15    | -1.074 | 0.328 | -3.278 | 0.001 | 0.342 | 0.112 | -5.883 | 0     | 0.18  | 0.649 |
| PDZRN4   | -0.793 | 0.315 | -2.519 | 0.012 | 0.453 | 0.142 | -3.842 | 0     | 0.244 | 0.839 |
| PDZRN3   | -0.887 | 0.315 | -2.817 | 0.005 | 0.412 | 0.13  | -4.535 | 0     | 0.222 | 0.763 |
| PDZK1IP1 | 0.24   | 0.296 | 0.809  | 0.419 | 1.271 | 0.377 | 0.719  | 0.472 | 0.711 | 2.271 |
| PDZK1    | -0.082 | 0.298 | -0.276 | 0.783 | 0.921 | 0.274 | -0.287 | 0.774 | 0.514 | 1.651 |
| PDZD8    | 0.367  | 0.298 | 1.229  | 0.219 | 1.443 | 0.43  | 1.029  | 0.304 | 0.804 | 2.589 |
| PDZD7    | 0.464  | 0.3   | 1.544  | 0.123 | 1.59  | 0.478 | 1.235  | 0.217 | 0.883 | 2.866 |
| PDZD3    | 0.07   | 0.295 | 0.236  | 0.813 | 1.072 | 0.316 | 0.228  | 0.82  | 0.601 | 1.912 |
| PDZD2    | -0.334 | 0.298 | -1.123 | 0.261 | 0.716 | 0.213 | -1.334 | 0.182 | 0.399 | 1.283 |
| PDYN     | -0.047 | 0.295 | -0.159 | 0.874 | 0.954 | 0.282 | -0.163 | 0.871 | 0.535 | 1.702 |

|         |        |       |        |       |       |       |        |       |       |       |
|---------|--------|-------|--------|-------|-------|-------|--------|-------|-------|-------|
| PDXP-DT | 0.126  | 0.295 | 0.426  | 0.67  | 1.134 | 0.335 | 0.4    | 0.689 | 0.636 | 2.024 |
| PDXK    | -0.334 | 0.298 | -1.124 | 0.261 | 0.716 | 0.213 | -1.334 | 0.182 | 0.4   | 1.283 |
| PDX1    | 0.101  | 0.295 | 0.342  | 0.733 | 1.106 | 0.327 | 0.325  | 0.745 | 0.62  | 1.973 |
| PDSS2   | 0.697  | 0.31  | 2.25   | 0.024 | 2.007 | 0.622 | 1.62   | 0.105 | 1.094 | 3.683 |
| PDSS1   | 0.436  | 0.303 | 1.44   | 0.15  | 1.546 | 0.468 | 1.167  | 0.243 | 0.854 | 2.798 |
| PDS5B   | 0.32   | 0.298 | 1.074  | 0.283 | 1.377 | 0.41  | 0.919  | 0.358 | 0.768 | 2.469 |
| PDS5A   | -0.438 | 0.303 | -1.447 | 0.148 | 0.645 | 0.195 | -1.815 | 0.07  | 0.357 | 1.168 |
| PDPR    | -0.443 | 0.301 | -1.476 | 0.14  | 0.642 | 0.193 | -1.857 | 0.063 | 0.356 | 1.157 |
| PDPN    | -0.537 | 0.302 | -1.776 | 0.076 | 0.585 | 0.177 | -2.351 | 0.019 | 0.323 | 1.057 |
| PDPK1   | 0.601  | 0.304 | 1.975  | 0.048 | 1.824 | 0.555 | 1.485  | 0.138 | 1.005 | 3.31  |
| PDP1    | -0.075 | 0.295 | -0.254 | 0.8   | 0.928 | 0.274 | -0.263 | 0.792 | 0.52  | 1.654 |
| PDLIM7  | -0.78  | 0.31  | -2.515 | 0.012 | 0.458 | 0.142 | -3.81  | 0     | 0.25  | 0.842 |
| PDLIM5  | -0.892 | 0.321 | -2.779 | 0.005 | 0.41  | 0.132 | -4.488 | 0     | 0.218 | 0.769 |
| PDLIM4  | -0.254 | 0.298 | -0.853 | 0.394 | 0.776 | 0.231 | -0.971 | 0.332 | 0.433 | 1.39  |
| PDLIM3  | 0.033  | 0.295 | 0.111  | 0.911 | 1.033 | 0.305 | 0.109  | 0.913 | 0.579 | 1.843 |
| PDLIM2  | -0.172 | 0.296 | -0.582 | 0.56  | 0.842 | 0.249 | -0.635 | 0.525 | 0.471 | 1.504 |
| PDLIM1  | -0.688 | 0.31  | -2.222 | 0.026 | 0.502 | 0.156 | -3.197 | 0.001 | 0.274 | 0.922 |
| PDK4    | -0.39  | 0.303 | -1.285 | 0.199 | 0.677 | 0.205 | -1.572 | 0.116 | 0.374 | 1.227 |
| PDK3    | 0.346  | 0.298 | 1.16   | 0.246 | 1.413 | 0.421 | 0.981  | 0.326 | 0.788 | 2.532 |
| PDK2    | -0.069 | 0.295 | -0.235 | 0.814 | 0.933 | 0.275 | -0.243 | 0.808 | 0.523 | 1.664 |
| PDK1    | -0.073 | 0.299 | -0.244 | 0.807 | 0.93  | 0.278 | -0.253 | 0.8   | 0.518 | 1.67  |
| PDIA6   | 0.358  | 0.305 | 1.175  | 0.24  | 1.431 | 0.436 | 0.987  | 0.323 | 0.787 | 2.601 |
| PDIA4   | 0.086  | 0.295 | 0.29   | 0.772 | 1.089 | 0.322 | 0.278  | 0.781 | 0.611 | 1.944 |
| PDIA3   | -0.312 | 0.298 | -1.05  | 0.294 | 0.732 | 0.218 | -1.232 | 0.218 | 0.408 | 1.311 |
| PDIA2   | 0.242  | 0.298 | 0.813  | 0.416 | 1.274 | 0.379 | 0.722  | 0.47  | 0.711 | 2.283 |
| PDHX    | 0.242  | 0.296 | 0.817  | 0.414 | 1.274 | 0.378 | 0.726  | 0.468 | 0.713 | 2.277 |
| PDHB    | 0.331  | 0.298 | 1.111  | 0.267 | 1.392 | 0.415 | 0.946  | 0.344 | 0.777 | 2.496 |
| PDHA2   | 0.021  | 0.296 | 0.071  | 0.943 | 1.021 | 0.302 | 0.07   | 0.944 | 0.572 | 1.823 |
| PDHA1   | 0.181  | 0.295 | 0.611  | 0.541 | 1.198 | 0.354 | 0.559  | 0.576 | 0.671 | 2.138 |
| PDGFRL  | -0.843 | 0.315 | -2.679 | 0.007 | 0.43  | 0.135 | -4.205 | 0     | 0.232 | 0.798 |
| PDGFRB  | -0.765 | 0.31  | -2.466 | 0.014 | 0.465 | 0.144 | -3.705 | 0     | 0.253 | 0.855 |
| PDGFRA  | -0.632 | 0.304 | -2.081 | 0.037 | 0.532 | 0.161 | -2.901 | 0.004 | 0.293 | 0.964 |
| PDGFD   | -0.653 | 0.306 | -2.135 | 0.033 | 0.521 | 0.159 | -3.012 | 0.003 | 0.286 | 0.948 |
| PDGFC   | -0.967 | 0.321 | -3.016 | 0.003 | 0.38  | 0.122 | -5.086 | 0     | 0.203 | 0.713 |
| PDGFB   | 0.302  | 0.297 | 1.017  | 0.309 | 1.352 | 0.401 | 0.878  | 0.38  | 0.756 | 2.419 |
| PDGFA   | -0.313 | 0.298 | -1.052 | 0.293 | 0.731 | 0.218 | -1.235 | 0.217 | 0.407 | 1.311 |
| PDE9A   | -0.671 | 0.306 | -2.194 | 0.028 | 0.511 | 0.156 | -3.127 | 0.002 | 0.281 | 0.931 |
| PDE8B   | 0.445  | 0.302 | 1.472  | 0.141 | 1.56  | 0.472 | 1.188  | 0.235 | 0.863 | 2.822 |

|           |        |       |        |       |       |       |        |       |       |       |
|-----------|--------|-------|--------|-------|-------|-------|--------|-------|-------|-------|
| PDE8A     | -0.308 | 0.298 | -1.036 | 0.3   | 0.735 | 0.219 | -1.214 | 0.225 | 0.41  | 1.317 |
| PDE7B     | 0.08   | 0.295 | 0.272  | 0.785 | 1.084 | 0.32  | 0.262  | 0.793 | 0.608 | 1.933 |
| PDE6H     | -0.418 | 0.302 | -1.384 | 0.166 | 0.658 | 0.199 | -1.719 | 0.086 | 0.364 | 1.19  |
| PDE6G     | 0.029  | 0.296 | 0.097  | 0.922 | 1.029 | 0.305 | 0.096  | 0.924 | 0.576 | 1.838 |
| PDE6D     | 0.043  | 0.3   | 0.143  | 0.886 | 1.044 | 0.313 | 0.14   | 0.889 | 0.58  | 1.878 |
| PDE6C     | -0.023 | 0.295 | -0.08  | 0.937 | 0.977 | 0.288 | -0.08  | 0.936 | 0.548 | 1.742 |
| PDE6B     | -0.074 | 0.3   | -0.246 | 0.805 | 0.929 | 0.278 | -0.256 | 0.798 | 0.516 | 1.671 |
| PDE6A     | 0.333  | 0.298 | 1.12   | 0.263 | 1.396 | 0.415 | 0.953  | 0.341 | 0.779 | 2.5   |
| PDE5A     | -0.132 | 0.296 | -0.446 | 0.656 | 0.876 | 0.26  | -0.477 | 0.634 | 0.49  | 1.566 |
| PDE4DIP   | -0.287 | 0.3   | -0.958 | 0.338 | 0.75  | 0.225 | -1.11  | 0.267 | 0.417 | 1.35  |
| PDE4D     | -0.254 | 0.296 | -0.857 | 0.391 | 0.776 | 0.23  | -0.976 | 0.329 | 0.434 | 1.387 |
| PDE4B     | -0.203 | 0.296 | -0.685 | 0.493 | 0.816 | 0.242 | -0.759 | 0.448 | 0.457 | 1.459 |
| PDE4A     | -0.253 | 0.298 | -0.851 | 0.395 | 0.776 | 0.231 | -0.968 | 0.333 | 0.433 | 1.392 |
| PDE3B     | 0.093  | 0.297 | 0.313  | 0.754 | 1.098 | 0.326 | 0.299  | 0.765 | 0.613 | 1.966 |
| PDE3A     | 0.186  | 0.296 | 0.628  | 0.53  | 1.204 | 0.356 | 0.573  | 0.567 | 0.675 | 2.149 |
| PDE2A     | -0.451 | 0.302 | -1.491 | 0.136 | 0.637 | 0.193 | -1.883 | 0.06  | 0.352 | 1.153 |
| PDE1C     | -0.616 | 0.306 | -2.012 | 0.044 | 0.54  | 0.165 | -2.781 | 0.005 | 0.296 | 0.984 |
| PDE1B     | 0.022  | 0.295 | 0.076  | 0.939 | 1.023 | 0.302 | 0.075  | 0.94  | 0.573 | 1.825 |
| PDE1A     | -1.131 | 0.328 | -3.448 | 0.001 | 0.323 | 0.106 | -6.399 | 0     | 0.17  | 0.614 |
| PDE12     | 0.159  | 0.295 | 0.54   | 0.589 | 1.173 | 0.346 | 0.499  | 0.618 | 0.657 | 2.093 |
| PDE11A    | -0.175 | 0.296 | -0.59  | 0.555 | 0.84  | 0.249 | -0.645 | 0.519 | 0.47  | 1.5   |
| PDE10A    | -0.725 | 0.306 | -2.367 | 0.018 | 0.485 | 0.148 | -3.475 | 0.001 | 0.266 | 0.883 |
| PDCL      | 0.052  | 0.295 | 0.175  | 0.861 | 1.053 | 0.311 | 0.171  | 0.864 | 0.59  | 1.879 |
| PDCD6IP   | -0.082 | 0.296 | -0.277 | 0.782 | 0.921 | 0.272 | -0.289 | 0.773 | 0.516 | 1.644 |
| PDCD6     | 0.692  | 0.304 | 2.274  | 0.023 | 1.998 | 0.608 | 1.641  | 0.101 | 1.1   | 3.626 |
| PDCD5     | 0.636  | 0.303 | 2.097  | 0.036 | 1.888 | 0.572 | 1.552  | 0.121 | 1.042 | 3.421 |
| PDCD4-AS1 | -0.2   | 0.296 | -0.674 | 0.5   | 0.819 | 0.243 | -0.746 | 0.456 | 0.458 | 1.463 |
| PDCD2     | 0.057  | 0.296 | 0.192  | 0.848 | 1.058 | 0.313 | 0.186  | 0.852 | 0.593 | 1.89  |
| PDCD1LG2  | 0.05   | 0.295 | 0.169  | 0.866 | 1.051 | 0.31  | 0.165  | 0.869 | 0.589 | 1.875 |
| PDCD11    | 0.329  | 0.3   | 1.095  | 0.273 | 1.389 | 0.417 | 0.933  | 0.351 | 0.771 | 2.502 |
| PDCD10    | 0.864  | 0.315 | 2.739  | 0.006 | 2.373 | 0.748 | 1.834  | 0.067 | 1.279 | 4.403 |
| PDCD1     | 0.322  | 0.297 | 1.083  | 0.279 | 1.38  | 0.41  | 0.926  | 0.354 | 0.771 | 2.472 |
| PDC       | 0.117  | 0.295 | 0.396  | 0.692 | 1.124 | 0.332 | 0.374  | 0.709 | 0.63  | 2.005 |
| PDAP1     | 0.264  | 0.296 | 0.891  | 0.373 | 1.302 | 0.385 | 0.784  | 0.433 | 0.729 | 2.326 |
| PCYT2     | 0.246  | 0.296 | 0.831  | 0.406 | 1.279 | 0.379 | 0.737  | 0.461 | 0.716 | 2.287 |
| PCYT1B    | -0.558 | 0.303 | -1.84  | 0.066 | 0.573 | 0.173 | -2.463 | 0.014 | 0.316 | 1.037 |
| PCYT1A    | 0.294  | 0.298 | 0.989  | 0.323 | 1.342 | 0.4   | 0.857  | 0.392 | 0.749 | 2.406 |
| PCYOX1L   | 0.289  | 0.298 | 0.972  | 0.331 | 1.336 | 0.398 | 0.844  | 0.399 | 0.745 | 2.394 |

|          |        |       |        |       |       |       |        |       |       |       |
|----------|--------|-------|--------|-------|-------|-------|--------|-------|-------|-------|
| PCYOX1   | 0.082  | 0.296 | 0.279  | 0.78  | 1.086 | 0.321 | 0.268  | 0.789 | 0.608 | 1.939 |
| PCTP     | 0.397  | 0.3   | 1.324  | 0.185 | 1.487 | 0.446 | 1.093  | 0.274 | 0.827 | 2.677 |
| PCSK7    | -0.757 | 0.31  | -2.442 | 0.015 | 0.469 | 0.145 | -3.652 | 0     | 0.255 | 0.861 |
| PCSK6    | -0.366 | 0.298 | -1.23  | 0.219 | 0.693 | 0.206 | -1.486 | 0.137 | 0.387 | 1.243 |
| PCSK5    | -0.44  | 0.3   | -1.467 | 0.142 | 0.644 | 0.193 | -1.842 | 0.065 | 0.358 | 1.159 |
| PCSK2    | 0.621  | 0.303 | 2.048  | 0.041 | 1.86  | 0.564 | 1.526  | 0.127 | 1.027 | 3.369 |
| PCSK1N   | -0.153 | 0.296 | -0.515 | 0.607 | 0.859 | 0.254 | -0.556 | 0.578 | 0.48  | 1.534 |
| PCSK1    | -0.058 | 0.295 | -0.195 | 0.845 | 0.944 | 0.279 | -0.201 | 0.841 | 0.529 | 1.684 |
| PCP4     | 0.391  | 0.3   | 1.305  | 0.192 | 1.478 | 0.443 | 1.08   | 0.28  | 0.822 | 2.66  |
| PCOTH    | -0.257 | 0.297 | -0.863 | 0.388 | 0.774 | 0.23  | -0.984 | 0.325 | 0.432 | 1.386 |
| PCOLCE2  | 0.394  | 0.3   | 1.316  | 0.188 | 1.483 | 0.444 | 1.088  | 0.277 | 0.825 | 2.668 |
| PCOLCE   | -0.878 | 0.315 | -2.789 | 0.005 | 0.416 | 0.131 | -4.466 | 0     | 0.224 | 0.77  |
| PCNX4    | -0.07  | 0.296 | -0.237 | 0.812 | 0.932 | 0.276 | -0.246 | 0.806 | 0.522 | 1.664 |
| PCNX2    | -0.18  | 0.296 | -0.61  | 0.542 | 0.835 | 0.247 | -0.668 | 0.504 | 0.468 | 1.49  |
| PCNX1    | -0.057 | 0.295 | -0.194 | 0.846 | 0.944 | 0.279 | -0.199 | 0.842 | 0.53  | 1.684 |
| PCNT     | 0.075  | 0.298 | 0.251  | 0.802 | 1.078 | 0.321 | 0.242  | 0.809 | 0.601 | 1.931 |
| PCNP     | -0.215 | 0.296 | -0.726 | 0.468 | 0.807 | 0.239 | -0.81  | 0.418 | 0.451 | 1.441 |
| PCNA     | 0.562  | 0.302 | 1.859  | 0.063 | 1.755 | 0.531 | 1.422  | 0.155 | 0.97  | 3.173 |
| PCMTD2   | 0.074  | 0.296 | 0.25   | 0.803 | 1.077 | 0.318 | 0.241  | 0.81  | 0.603 | 1.922 |
| PCMT1    | 0.225  | 0.296 | 0.761  | 0.447 | 1.253 | 0.371 | 0.681  | 0.496 | 0.701 | 2.239 |
| PCM1     | -0.435 | 0.302 | -1.438 | 0.15  | 0.647 | 0.196 | -1.801 | 0.072 | 0.358 | 1.171 |
| PCLO     | 0.105  | 0.296 | 0.355  | 0.723 | 1.111 | 0.329 | 0.337  | 0.736 | 0.622 | 1.984 |
| PCLAF    | 0.692  | 0.306 | 2.265  | 0.024 | 1.998 | 0.611 | 1.634  | 0.102 | 1.098 | 3.637 |
| PCK2     | 0.765  | 0.31  | 2.467  | 0.014 | 2.149 | 0.667 | 1.724  | 0.085 | 1.17  | 3.947 |
| PCK1     | 0.236  | 0.297 | 0.797  | 0.426 | 1.267 | 0.376 | 0.709  | 0.478 | 0.708 | 2.265 |
| PCIF1    | -0.329 | 0.298 | -1.106 | 0.269 | 0.719 | 0.214 | -1.31  | 0.19  | 0.401 | 1.29  |
| PCID2    | 0.308  | 0.297 | 1.036  | 0.3   | 1.361 | 0.404 | 0.892  | 0.372 | 0.76  | 2.436 |
| PCGF3    | 0.215  | 0.295 | 0.727  | 0.467 | 1.239 | 0.366 | 0.654  | 0.513 | 0.695 | 2.212 |
| PCGF2    | -0.592 | 0.304 | -1.948 | 0.051 | 0.553 | 0.168 | -2.657 | 0.008 | 0.305 | 1.004 |
| PCGF1    | 0.045  | 0.296 | 0.151  | 0.88  | 1.046 | 0.309 | 0.148  | 0.883 | 0.586 | 1.867 |
| PCF11    | -0.108 | 0.296 | -0.363 | 0.716 | 0.898 | 0.266 | -0.384 | 0.701 | 0.503 | 1.604 |
| PCDHGC3  | -0.178 | 0.296 | -0.602 | 0.547 | 0.837 | 0.248 | -0.659 | 0.51  | 0.468 | 1.495 |
| PCDHGB6  | 0.145  | 0.296 | 0.492  | 0.623 | 1.157 | 0.342 | 0.458  | 0.647 | 0.648 | 2.065 |
| PCDHGB5  | -0.029 | 0.295 | -0.1   | 0.921 | 0.971 | 0.287 | -0.101 | 0.919 | 0.544 | 1.732 |
| PCDHGA9  | -0.027 | 0.297 | -0.092 | 0.927 | 0.973 | 0.289 | -0.093 | 0.926 | 0.544 | 1.741 |
| PCDHGA8  | 0.639  | 0.306 | 2.087  | 0.037 | 1.894 | 0.58  | 1.543  | 0.123 | 1.04  | 3.45  |
| PCDHGA3  | -0.511 | 0.301 | -1.698 | 0.089 | 0.6   | 0.18  | -2.217 | 0.027 | 0.333 | 1.082 |
| PCDHGA10 | -0.111 | 0.296 | -0.375 | 0.707 | 0.895 | 0.265 | -0.397 | 0.691 | 0.5   | 1.6   |

|          |        |       |        |       |       |       |        |       |       |       |
|----------|--------|-------|--------|-------|-------|-------|--------|-------|-------|-------|
| PCDHGA1  | -0.079 | 0.296 | -0.266 | 0.79  | 0.924 | 0.274 | -0.277 | 0.782 | 0.517 | 1.652 |
| PCDHB8   | 0.457  | 0.3   | 1.527  | 0.127 | 1.58  | 0.473 | 1.225  | 0.22  | 0.878 | 2.841 |
| PCDHB6   | 0.185  | 0.296 | 0.625  | 0.532 | 1.203 | 0.356 | 0.57   | 0.569 | 0.673 | 2.15  |
| PCDHB3   | 0.227  | 0.297 | 0.765  | 0.445 | 1.255 | 0.372 | 0.684  | 0.494 | 0.702 | 2.243 |
| PCDHB17P | -0.123 | 0.296 | -0.417 | 0.676 | 0.884 | 0.261 | -0.444 | 0.657 | 0.495 | 1.578 |
| PCDHB13  | 0.064  | 0.295 | 0.216  | 0.829 | 1.066 | 0.315 | 0.209  | 0.834 | 0.598 | 1.901 |
| PCDHB12  | -0.428 | 0.3   | -1.426 | 0.154 | 0.652 | 0.195 | -1.78  | 0.075 | 0.362 | 1.174 |
| PCDHB11  | 0.029  | 0.296 | 0.098  | 0.922 | 1.029 | 0.304 | 0.096  | 0.923 | 0.576 | 1.838 |
| PCDHB1   | 0.038  | 0.297 | 0.128  | 0.898 | 1.039 | 0.308 | 0.126  | 0.9   | 0.581 | 1.859 |
| PCDHA9   | 0.338  | 0.308 | 1.095  | 0.274 | 1.402 | 0.432 | 0.929  | 0.353 | 0.766 | 2.565 |
| PCDHA5   | 0.346  | 0.298 | 1.163  | 0.245 | 1.413 | 0.421 | 0.983  | 0.326 | 0.789 | 2.533 |
| PCDHA2   | -0.034 | 0.295 | -0.117 | 0.907 | 0.966 | 0.285 | -0.119 | 0.906 | 0.542 | 1.723 |
| PCDHA10  | -0.33  | 0.3   | -1.1   | 0.272 | 0.719 | 0.216 | -1.302 | 0.193 | 0.4   | 1.294 |
| PCDH9    | -0.519 | 0.302 | -1.717 | 0.086 | 0.595 | 0.18  | -2.252 | 0.024 | 0.329 | 1.076 |
| PCDH8    | 0.359  | 0.298 | 1.208  | 0.227 | 1.432 | 0.426 | 1.015  | 0.31  | 0.799 | 2.567 |
| PCDH7    | -0.951 | 0.321 | -2.966 | 0.003 | 0.386 | 0.124 | -4.953 | 0     | 0.206 | 0.724 |
| PCDH17   | 0.15   | 0.296 | 0.508  | 0.611 | 1.162 | 0.344 | 0.472  | 0.637 | 0.651 | 2.075 |
| PCDH12   | -0.308 | 0.3   | -1.028 | 0.304 | 0.735 | 0.22  | -1.204 | 0.228 | 0.408 | 1.322 |
| PCDH11X  | 0.09   | 0.296 | 0.305  | 0.76  | 1.095 | 0.324 | 0.292  | 0.77  | 0.613 | 1.954 |
| PCDH1    | -0.171 | 0.297 | -0.575 | 0.565 | 0.843 | 0.251 | -0.627 | 0.531 | 0.471 | 1.509 |
| PCCB     | 0.102  | 0.295 | 0.344  | 0.731 | 1.107 | 0.327 | 0.327  | 0.743 | 0.621 | 1.974 |
| PCCA     | 0.12   | 0.296 | 0.405  | 0.686 | 1.127 | 0.333 | 0.381  | 0.703 | 0.631 | 2.013 |
| PCBP4    | 0.448  | 0.3   | 1.494  | 0.135 | 1.565 | 0.469 | 1.204  | 0.229 | 0.869 | 2.818 |
| PCBP3    | 0.014  | 0.297 | 0.046  | 0.963 | 1.014 | 0.301 | 0.046  | 0.963 | 0.567 | 1.814 |
| PCBP2    | -0.775 | 0.311 | -2.492 | 0.013 | 0.461 | 0.143 | -3.765 | 0     | 0.25  | 0.847 |
| PCBP1    | -0.325 | 0.301 | -1.083 | 0.279 | 0.722 | 0.217 | -1.28  | 0.201 | 0.401 | 1.302 |
| PCBD1    | -0.574 | 0.306 | -1.878 | 0.06  | 0.563 | 0.172 | -2.537 | 0.011 | 0.31  | 1.025 |
| PC       | 0.101  | 0.295 | 0.343  | 0.731 | 1.107 | 0.327 | 0.327  | 0.744 | 0.62  | 1.975 |
| PBXIP1   | 0.089  | 0.296 | 0.302  | 0.763 | 1.093 | 0.323 | 0.289  | 0.773 | 0.613 | 1.951 |
| PBX3     | -0.588 | 0.306 | -1.925 | 0.054 | 0.555 | 0.17  | -2.621 | 0.009 | 0.305 | 1.011 |
| PBX2     | 0.451  | 0.302 | 1.491  | 0.136 | 1.57  | 0.475 | 1.2    | 0.23  | 0.868 | 2.84  |
| PBX1     | -0.1   | 0.295 | -0.34  | 0.734 | 0.904 | 0.267 | -0.358 | 0.721 | 0.507 | 1.613 |
| PBRM1    | 0.145  | 0.296 | 0.489  | 0.625 | 1.156 | 0.343 | 0.455  | 0.649 | 0.647 | 2.067 |
| PBOV1    | 0.633  | 0.306 | 2.065  | 0.039 | 1.883 | 0.577 | 1.53   | 0.126 | 1.033 | 3.432 |
| PBLD     | 0.588  | 0.303 | 1.94   | 0.052 | 1.8   | 0.546 | 1.467  | 0.142 | 0.994 | 3.261 |
| PBK      | 0.946  | 0.315 | 3.001  | 0.003 | 2.576 | 0.812 | 1.941  | 0.052 | 1.389 | 4.78  |
| PAXIP1   | 0.101  | 0.295 | 0.343  | 0.731 | 1.107 | 0.327 | 0.326  | 0.744 | 0.621 | 1.973 |
| PAXBP1   | 0.178  | 0.296 | 0.6    | 0.548 | 1.195 | 0.354 | 0.55   | 0.582 | 0.668 | 2.135 |

|           |        |       |        |       |       |       |        |       |       |       |
|-----------|--------|-------|--------|-------|-------|-------|--------|-------|-------|-------|
| PAX9      | -0.101 | 0.295 | -0.341 | 0.733 | 0.904 | 0.267 | -0.359 | 0.72  | 0.507 | 1.613 |
| PAX8      | -0.367 | 0.299 | -1.228 | 0.219 | 0.693 | 0.207 | -1.484 | 0.138 | 0.386 | 1.244 |
| PAX7      | 0.61   | 0.306 | 1.996  | 0.046 | 1.841 | 0.563 | 1.494  | 0.135 | 1.011 | 3.353 |
| PAX6      | 0.201  | 0.296 | 0.678  | 0.498 | 1.222 | 0.362 | 0.615  | 0.539 | 0.684 | 2.184 |
| PAX5      | -0.686 | 0.306 | -2.238 | 0.025 | 0.504 | 0.154 | -3.216 | 0.001 | 0.276 | 0.918 |
| PAX4      | 0.064  | 0.295 | 0.217  | 0.828 | 1.066 | 0.315 | 0.211  | 0.833 | 0.598 | 1.901 |
| PAX3      | 0.214  | 0.298 | 0.719  | 0.472 | 1.239 | 0.369 | 0.647  | 0.517 | 0.691 | 2.222 |
| PAX2      | 0.048  | 0.296 | 0.161  | 0.872 | 1.049 | 0.31  | 0.158  | 0.875 | 0.588 | 1.872 |
| PAX1      | -0.265 | 0.296 | -0.894 | 0.371 | 0.767 | 0.227 | -1.023 | 0.306 | 0.429 | 1.372 |
| PAWR      | -0.347 | 0.298 | -1.166 | 0.244 | 0.707 | 0.21  | -1.394 | 0.163 | 0.394 | 1.267 |
| PATZ1     | 0.194  | 0.296 | 0.655  | 0.512 | 1.214 | 0.36  | 0.596  | 0.551 | 0.679 | 2.17  |
| PATJ      | -0.339 | 0.3   | -1.13  | 0.258 | 0.713 | 0.214 | -1.345 | 0.179 | 0.396 | 1.282 |
| PASK      | -0.297 | 0.298 | -0.997 | 0.319 | 0.743 | 0.222 | -1.16  | 0.246 | 0.414 | 1.333 |
| PARVB     | -0.263 | 0.297 | -0.883 | 0.377 | 0.769 | 0.229 | -1.01  | 0.313 | 0.429 | 1.377 |
| PARVA     | -1.049 | 0.328 | -3.201 | 0.001 | 0.35  | 0.115 | -5.659 | 0     | 0.184 | 0.666 |
| PART1     | -0.053 | 0.295 | -0.179 | 0.858 | 0.948 | 0.28  | -0.184 | 0.854 | 0.531 | 1.692 |
| PARPBP    | 0.487  | 0.3   | 1.625  | 0.104 | 1.627 | 0.488 | 1.286  | 0.198 | 0.904 | 2.927 |
| PARP8     | -0.258 | 0.296 | -0.872 | 0.383 | 0.772 | 0.229 | -0.995 | 0.32  | 0.432 | 1.38  |
| PARP6     | 0.195  | 0.299 | 0.655  | 0.513 | 1.216 | 0.363 | 0.595  | 0.552 | 0.677 | 2.183 |
| PARP4     | 0.247  | 0.3   | 0.822  | 0.411 | 1.28  | 0.385 | 0.728  | 0.466 | 0.71  | 2.307 |
| PARP3     | -0.357 | 0.3   | -1.188 | 0.235 | 0.7   | 0.21  | -1.428 | 0.153 | 0.389 | 1.261 |
| PARP2     | 0.554  | 0.306 | 1.809  | 0.07  | 1.74  | 0.533 | 1.389  | 0.165 | 0.955 | 3.17  |
| PARP16    | -0.255 | 0.298 | -0.858 | 0.391 | 0.775 | 0.231 | -0.977 | 0.329 | 0.432 | 1.388 |
| PARP12    | 0.487  | 0.3   | 1.622  | 0.105 | 1.627 | 0.488 | 1.285  | 0.199 | 0.904 | 2.929 |
| PARP11    | 0.66   | 0.303 | 2.177  | 0.029 | 1.935 | 0.587 | 1.594  | 0.111 | 1.068 | 3.506 |
| PARP1     | 0.235  | 0.296 | 0.792  | 0.428 | 1.264 | 0.374 | 0.706  | 0.48  | 0.708 | 2.259 |
| PARN      | -0.239 | 0.296 | -0.808 | 0.419 | 0.787 | 0.233 | -0.913 | 0.361 | 0.441 | 1.407 |
| PARM1-AS1 | -0.011 | 0.296 | -0.037 | 0.971 | 0.989 | 0.292 | -0.037 | 0.97  | 0.554 | 1.765 |
| PARM1     | 0.408  | 0.3   | 1.362  | 0.173 | 1.504 | 0.45  | 1.118  | 0.263 | 0.836 | 2.705 |
| PARL      | 0.84   | 0.315 | 2.671  | 0.008 | 2.317 | 0.729 | 1.807  | 0.071 | 1.251 | 4.294 |
| PARK7     | -0.249 | 0.3   | -0.828 | 0.408 | 0.78  | 0.234 | -0.94  | 0.347 | 0.433 | 1.405 |
| PARG      | 0.613  | 0.303 | 2.024  | 0.043 | 1.846 | 0.559 | 1.513  | 0.13  | 1.02  | 3.341 |
| PARD6B    | -1.008 | 0.328 | -3.074 | 0.002 | 0.365 | 0.12  | -5.307 | 0     | 0.192 | 0.694 |
| PARD6A    | 0.607  | 0.302 | 2.013  | 0.044 | 1.835 | 0.554 | 1.509  | 0.131 | 1.016 | 3.315 |
| PARD3     | 0.456  | 0.302 | 1.51   | 0.131 | 1.578 | 0.477 | 1.212  | 0.225 | 0.873 | 2.855 |
| PAQR6     | 0.223  | 0.296 | 0.755  | 0.451 | 1.25  | 0.37  | 0.676  | 0.499 | 0.7   | 2.234 |
| PAQR5     | 0.359  | 0.298 | 1.205  | 0.228 | 1.431 | 0.426 | 1.013  | 0.311 | 0.799 | 2.565 |
| PAQR4     | 0.493  | 0.302 | 1.632  | 0.103 | 1.637 | 0.495 | 1.288  | 0.198 | 0.906 | 2.961 |

|          |        |       |        |       |       |       |        |       |       |       |
|----------|--------|-------|--------|-------|-------|-------|--------|-------|-------|-------|
| PAQR3    | 0.199  | 0.299 | 0.666  | 0.505 | 1.22  | 0.364 | 0.604  | 0.546 | 0.68  | 2.191 |
| PAPSS2   | 0.448  | 0.3   | 1.495  | 0.135 | 1.565 | 0.469 | 1.205  | 0.228 | 0.87  | 2.815 |
| PAPSS1   | -0.6   | 0.306 | -1.961 | 0.05  | 0.549 | 0.168 | -2.687 | 0.007 | 0.301 | 1     |
| PAPPA2   | 0.015  | 0.296 | 0.049  | 0.961 | 1.015 | 0.3   | 0.049  | 0.961 | 0.568 | 1.812 |
| PAPPA    | 0.173  | 0.297 | 0.581  | 0.561 | 1.189 | 0.353 | 0.534  | 0.593 | 0.664 | 2.128 |
| PAPOLG   | -0.533 | 0.303 | -1.761 | 0.078 | 0.587 | 0.178 | -2.326 | 0.02  | 0.324 | 1.062 |
| PAPOLB   | -0.154 | 0.296 | -0.522 | 0.602 | 0.857 | 0.254 | -0.564 | 0.573 | 0.48  | 1.531 |
| PAPOLA   | -0.303 | 0.298 | -1.017 | 0.309 | 0.739 | 0.22  | -1.187 | 0.235 | 0.412 | 1.324 |
| PAOX     | -0.23  | 0.298 | -0.772 | 0.44  | 0.795 | 0.236 | -0.868 | 0.385 | 0.443 | 1.424 |
| PANX1    | 0.02   | 0.295 | 0.069  | 0.945 | 1.021 | 0.301 | 0.068  | 0.945 | 0.572 | 1.82  |
| PANK4    | -0.01  | 0.295 | -0.033 | 0.974 | 0.99  | 0.293 | -0.033 | 0.974 | 0.555 | 1.767 |
| PANK3    | -0.665 | 0.31  | -2.146 | 0.032 | 0.514 | 0.159 | -3.048 | 0.002 | 0.28  | 0.944 |
| PANK2    | 0.729  | 0.31  | 2.352  | 0.019 | 2.073 | 0.642 | 1.67   | 0.095 | 1.129 | 3.805 |
| PAN2     | -0.44  | 0.3   | -1.465 | 0.143 | 0.644 | 0.193 | -1.839 | 0.066 | 0.358 | 1.16  |
| PAMR1    | -0.256 | 0.298 | -0.861 | 0.389 | 0.774 | 0.23  | -0.982 | 0.326 | 0.432 | 1.387 |
| PAM16    | 0.171  | 0.295 | 0.579  | 0.562 | 1.187 | 0.351 | 0.533  | 0.594 | 0.665 | 2.118 |
| PAM      | -0.254 | 0.298 | -0.854 | 0.393 | 0.776 | 0.231 | -0.972 | 0.331 | 0.433 | 1.39  |
| PALMD    | -0.333 | 0.298 | -1.118 | 0.263 | 0.717 | 0.213 | -1.327 | 0.184 | 0.4   | 1.285 |
| PALM     | -0.13  | 0.295 | -0.44  | 0.66  | 0.878 | 0.259 | -0.47  | 0.638 | 0.492 | 1.566 |
| PALLD    | -0.426 | 0.3   | -1.42  | 0.156 | 0.653 | 0.196 | -1.77  | 0.077 | 0.363 | 1.176 |
| PALB2    | 0.46   | 0.302 | 1.523  | 0.128 | 1.585 | 0.479 | 1.22   | 0.222 | 0.876 | 2.866 |
| PAK6     | 0.069  | 0.295 | 0.235  | 0.814 | 1.072 | 0.316 | 0.227  | 0.821 | 0.601 | 1.912 |
| PAK5     | 0.039  | 0.296 | 0.132  | 0.895 | 1.04  | 0.308 | 0.129  | 0.897 | 0.582 | 1.858 |
| PAK4     | -0.553 | 0.302 | -1.831 | 0.067 | 0.575 | 0.174 | -2.445 | 0.014 | 0.318 | 1.04  |
| PAK3     | 0.068  | 0.298 | 0.23   | 0.818 | 1.071 | 0.319 | 0.222  | 0.824 | 0.597 | 1.921 |
| PAK2     | 0.057  | 0.295 | 0.193  | 0.847 | 1.059 | 0.313 | 0.187  | 0.851 | 0.593 | 1.889 |
| PAK11P1  | 0.135  | 0.295 | 0.456  | 0.649 | 1.144 | 0.338 | 0.426  | 0.67  | 0.641 | 2.041 |
| PAK1     | -0.077 | 0.296 | -0.26  | 0.795 | 0.926 | 0.274 | -0.27  | 0.787 | 0.518 | 1.655 |
| PAIP2B   | -0.502 | 0.302 | -1.663 | 0.096 | 0.605 | 0.183 | -2.16  | 0.031 | 0.335 | 1.094 |
| PAIP1    | 0.257  | 0.296 | 0.868  | 0.385 | 1.293 | 0.383 | 0.766  | 0.444 | 0.724 | 2.312 |
| PAICS    | 0.546  | 0.306 | 1.786  | 0.074 | 1.726 | 0.528 | 1.376  | 0.169 | 0.948 | 3.142 |
| PAGR1    | -0.377 | 0.302 | -1.247 | 0.212 | 0.686 | 0.207 | -1.515 | 0.13  | 0.379 | 1.241 |
| PAGE4    | 0.15   | 0.296 | 0.505  | 0.613 | 1.161 | 0.344 | 0.469  | 0.639 | 0.65  | 2.075 |
| PAGE1    | -0.047 | 0.295 | -0.158 | 0.875 | 0.954 | 0.282 | -0.162 | 0.872 | 0.535 | 1.703 |
| PAFAH2   | -0.377 | 0.302 | -1.248 | 0.212 | 0.686 | 0.207 | -1.516 | 0.13  | 0.379 | 1.24  |
| PAFAH1B3 | 0.346  | 0.299 | 1.155  | 0.248 | 1.413 | 0.423 | 0.977  | 0.329 | 0.786 | 2.539 |
| PAFAH1B2 | 0.299  | 0.298 | 1.004  | 0.315 | 1.349 | 0.402 | 0.868  | 0.385 | 0.752 | 2.42  |
| PAFAH1B1 | -0.613 | 0.306 | -2.007 | 0.045 | 0.542 | 0.166 | -2.77  | 0.006 | 0.297 | 0.986 |

|         |        |       |        |       |       |       |        |       |       |       |
|---------|--------|-------|--------|-------|-------|-------|--------|-------|-------|-------|
| PAF1    | 0.347  | 0.299 | 1.162  | 0.245 | 1.415 | 0.423 | 0.981  | 0.326 | 0.788 | 2.544 |
| PAEP    | 0.601  | 0.306 | 1.967  | 0.049 | 1.824 | 0.557 | 1.478  | 0.139 | 1.002 | 3.32  |
| PADI4   | 0.023  | 0.298 | 0.078  | 0.938 | 1.024 | 0.304 | 0.077  | 0.938 | 0.571 | 1.834 |
| PADI3   | -0.413 | 0.301 | -1.372 | 0.17  | 0.662 | 0.199 | -1.698 | 0.09  | 0.367 | 1.193 |
| PADI2   | -0.019 | 0.296 | -0.065 | 0.948 | 0.981 | 0.29  | -0.066 | 0.947 | 0.549 | 1.752 |
| PADI1   | -0.045 | 0.295 | -0.152 | 0.879 | 0.956 | 0.282 | -0.156 | 0.876 | 0.536 | 1.705 |
| PACSIN3 | 0.237  | 0.297 | 0.798  | 0.425 | 1.268 | 0.377 | 0.711  | 0.477 | 0.708 | 2.27  |
| PACSIN2 | -0.49  | 0.3   | -1.631 | 0.103 | 0.613 | 0.184 | -2.104 | 0.035 | 0.34  | 1.104 |
| PACS2   | -0.256 | 0.296 | -0.864 | 0.387 | 0.774 | 0.229 | -0.985 | 0.325 | 0.433 | 1.383 |
| PACS1   | 0.72   | 0.305 | 2.36   | 0.018 | 2.055 | 0.627 | 1.682  | 0.092 | 1.13  | 3.738 |
| PACRG   | -0.362 | 0.299 | -1.213 | 0.225 | 0.696 | 0.208 | -1.461 | 0.144 | 0.388 | 1.25  |
| PACC1   | 0.123  | 0.295 | 0.415  | 0.678 | 1.131 | 0.334 | 0.391  | 0.696 | 0.634 | 2.017 |
| PABPN1  | -0.028 | 0.301 | -0.092 | 0.927 | 0.973 | 0.292 | -0.093 | 0.926 | 0.54  | 1.753 |
| PABPC4  | -0.278 | 0.296 | -0.938 | 0.348 | 0.757 | 0.225 | -1.081 | 0.28  | 0.423 | 1.354 |
| PABPC3  | 0.018  | 0.295 | 0.061  | 0.951 | 1.018 | 0.301 | 0.061  | 0.952 | 0.571 | 1.817 |
| PABPC1  | -0.036 | 0.297 | -0.122 | 0.903 | 0.964 | 0.286 | -0.124 | 0.901 | 0.539 | 1.725 |
| PAAF1   | 0.186  | 0.296 | 0.628  | 0.53  | 1.205 | 0.357 | 0.573  | 0.566 | 0.674 | 2.152 |
| PA2G4   | 0.394  | 0.3   | 1.314  | 0.189 | 1.482 | 0.444 | 1.086  | 0.277 | 0.824 | 2.667 |
| P4HTM   | -0.533 | 0.306 | -1.745 | 0.081 | 0.587 | 0.179 | -2.306 | 0.021 | 0.322 | 1.068 |
| P4HB    | -0.367 | 0.298 | -1.231 | 0.218 | 0.693 | 0.206 | -1.488 | 0.137 | 0.386 | 1.242 |
| P4HA2   | 0.375  | 0.298 | 1.259  | 0.208 | 1.455 | 0.433 | 1.05   | 0.294 | 0.812 | 2.608 |
| P4HA1   | -0.14  | 0.296 | -0.474 | 0.636 | 0.869 | 0.258 | -0.509 | 0.611 | 0.486 | 1.554 |
| P3H4    | -0.108 | 0.296 | -0.366 | 0.715 | 0.897 | 0.266 | -0.386 | 0.699 | 0.502 | 1.604 |
| P3H3    | -0.958 | 0.321 | -2.986 | 0.003 | 0.383 | 0.123 | -5.009 | 0     | 0.204 | 0.719 |
| P3H2    | -0.236 | 0.296 | -0.797 | 0.426 | 0.79  | 0.234 | -0.899 | 0.369 | 0.442 | 1.411 |
| P3H1    | 0.029  | 0.295 | 0.099  | 0.921 | 1.03  | 0.304 | 0.098  | 0.922 | 0.577 | 1.837 |
| P2RY6   | 0.465  | 0.303 | 1.535  | 0.125 | 1.591 | 0.482 | 1.228  | 0.219 | 0.879 | 2.88  |
| P2RY4   | -0.109 | 0.296 | -0.367 | 0.713 | 0.897 | 0.265 | -0.388 | 0.698 | 0.502 | 1.602 |
| P2RY2   | 0.002  | 0.295 | 0.006  | 0.995 | 1.002 | 0.296 | 0.006  | 0.995 | 0.562 | 1.786 |
| P2RY14  | -0.385 | 0.298 | -1.294 | 0.196 | 0.68  | 0.203 | -1.578 | 0.114 | 0.38  | 1.219 |
| P2RY13  | -0.945 | 0.321 | -2.946 | 0.003 | 0.389 | 0.125 | -4.904 | 0     | 0.207 | 0.729 |
| P2RY10  | -0.034 | 0.295 | -0.116 | 0.908 | 0.966 | 0.285 | -0.118 | 0.906 | 0.542 | 1.724 |
| P2RY1   | 0.036  | 0.295 | 0.121  | 0.904 | 1.036 | 0.306 | 0.119  | 0.905 | 0.581 | 1.849 |
| P2RX7   | 0.047  | 0.295 | 0.16   | 0.873 | 1.049 | 0.31  | 0.157  | 0.876 | 0.588 | 1.871 |
| P2RX6   | 0.363  | 0.3   | 1.21   | 0.226 | 1.437 | 0.431 | 1.015  | 0.31  | 0.799 | 2.585 |
| P2RX5   | -0.434 | 0.299 | -1.453 | 0.146 | 0.648 | 0.193 | -1.82  | 0.069 | 0.361 | 1.163 |
| P2RX4   | -0.487 | 0.306 | -1.592 | 0.111 | 0.614 | 0.188 | -2.052 | 0.04  | 0.337 | 1.119 |
| P2RX3   | -0.086 | 0.299 | -0.289 | 0.772 | 0.917 | 0.274 | -0.302 | 0.763 | 0.511 | 1.648 |



|         |        |       |        |       |       |       |        |       |       |       |
|---------|--------|-------|--------|-------|-------|-------|--------|-------|-------|-------|
| P2RX2   | 0.505  | 0.3   | 1.682  | 0.093 | 1.656 | 0.497 | 1.321  | 0.187 | 0.92  | 2.981 |
| P2RX1   | -0.637 | 0.306 | -2.08  | 0.037 | 0.529 | 0.162 | -2.909 | 0.004 | 0.29  | 0.964 |
| OXTR    | -0.088 | 0.296 | -0.297 | 0.767 | 0.916 | 0.271 | -0.31  | 0.756 | 0.512 | 1.637 |
| OXT     | -0.133 | 0.296 | -0.45  | 0.653 | 0.875 | 0.259 | -0.481 | 0.63  | 0.49  | 1.564 |
| OXSR1   | 0.277  | 0.298 | 0.929  | 0.353 | 1.319 | 0.392 | 0.812  | 0.417 | 0.736 | 2.363 |
| OXSM    | 0.284  | 0.298 | 0.953  | 0.34  | 1.328 | 0.395 | 0.83   | 0.407 | 0.741 | 2.379 |
| OXR1    | -0.007 | 0.295 | -0.023 | 0.982 | 0.993 | 0.293 | -0.023 | 0.982 | 0.557 | 1.772 |
| OXLD1   | 0.457  | 0.3   | 1.524  | 0.128 | 1.579 | 0.473 | 1.223  | 0.221 | 0.877 | 2.84  |
| OXCT2   | 0.475  | 0.302 | 1.572  | 0.116 | 1.608 | 0.486 | 1.251  | 0.211 | 0.889 | 2.909 |
| OXCT1   | -0.371 | 0.298 | -1.246 | 0.213 | 0.69  | 0.206 | -1.509 | 0.131 | 0.385 | 1.237 |
| OXA1L   | -0.445 | 0.302 | -1.472 | 0.141 | 0.641 | 0.194 | -1.853 | 0.064 | 0.354 | 1.159 |
| OVOL3   | -0.154 | 0.296 | -0.521 | 0.602 | 0.857 | 0.254 | -0.564 | 0.573 | 0.479 | 1.532 |
| OVOL2   | -0.122 | 0.298 | -0.408 | 0.683 | 0.886 | 0.264 | -0.434 | 0.664 | 0.494 | 1.588 |
| OVOL1   | -0.272 | 0.298 | -0.915 | 0.36  | 0.762 | 0.227 | -1.052 | 0.293 | 0.425 | 1.365 |
| OVGP1   | -0.052 | 0.296 | -0.175 | 0.861 | 0.95  | 0.281 | -0.18  | 0.857 | 0.532 | 1.695 |
| OTULINL | -0.24  | 0.298 | -0.803 | 0.422 | 0.787 | 0.235 | -0.908 | 0.364 | 0.439 | 1.412 |
| OTUD7B  | -0.044 | 0.295 | -0.151 | 0.88  | 0.957 | 0.282 | -0.154 | 0.878 | 0.536 | 1.706 |
| OTUD4   | 0.065  | 0.3   | 0.215  | 0.83  | 1.067 | 0.32  | 0.208  | 0.835 | 0.592 | 1.921 |
| OTUD3   | -0.157 | 0.296 | -0.53  | 0.596 | 0.855 | 0.253 | -0.574 | 0.566 | 0.478 | 1.527 |
| OTUB2   | 0.075  | 0.297 | 0.252  | 0.801 | 1.078 | 0.32  | 0.243  | 0.808 | 0.602 | 1.928 |
| OTOR    | 0.471  | 0.303 | 1.556  | 0.12  | 1.601 | 0.485 | 1.241  | 0.215 | 0.885 | 2.898 |
| OTOF    | -0.145 | 0.297 | -0.488 | 0.626 | 0.865 | 0.257 | -0.525 | 0.6   | 0.484 | 1.547 |
| OTC     | -0.337 | 0.298 | -1.13  | 0.259 | 0.714 | 0.213 | -1.343 | 0.179 | 0.398 | 1.281 |
| OSTM1   | -0.643 | 0.31  | -2.076 | 0.038 | 0.526 | 0.163 | -2.912 | 0.004 | 0.286 | 0.965 |
| OSTF1   | 1.004  | 0.322 | 3.115  | 0.002 | 2.729 | 0.879 | 1.966  | 0.049 | 1.451 | 5.132 |
| OSR2    | 0.141  | 0.295 | 0.478  | 0.633 | 1.152 | 0.34  | 0.446  | 0.656 | 0.646 | 2.054 |
| OSMR    | -0.57  | 0.303 | -1.882 | 0.06  | 0.565 | 0.171 | -2.538 | 0.011 | 0.312 | 1.024 |
| OSM     | 0.378  | 0.298 | 1.268  | 0.205 | 1.459 | 0.435 | 1.056  | 0.291 | 0.813 | 2.618 |
| OSGIN2  | 0.368  | 0.298 | 1.235  | 0.217 | 1.444 | 0.43  | 1.034  | 0.301 | 0.806 | 2.589 |
| OSGIN1  | -0.171 | 0.296 | -0.578 | 0.563 | 0.843 | 0.25  | -0.631 | 0.528 | 0.471 | 1.506 |
| OSGEPL1 | -0.301 | 0.297 | -1.011 | 0.312 | 0.74  | 0.22  | -1.18  | 0.238 | 0.413 | 1.326 |
| OSGEP   | 0.029  | 0.295 | 0.098  | 0.922 | 1.029 | 0.304 | 0.096  | 0.923 | 0.577 | 1.837 |
| OSER1   | 0.131  | 0.296 | 0.441  | 0.659 | 1.14  | 0.338 | 0.413  | 0.679 | 0.637 | 2.038 |
| OSBPL9  | -0.089 | 0.295 | -0.301 | 0.764 | 0.915 | 0.27  | -0.314 | 0.753 | 0.513 | 1.632 |
| OSBPL8  | -0.674 | 0.31  | -2.174 | 0.03  | 0.51  | 0.158 | -3.104 | 0.002 | 0.278 | 0.936 |
| OSBPL7  | 0.229  | 0.296 | 0.773  | 0.44  | 1.257 | 0.372 | 0.691  | 0.49  | 0.704 | 2.246 |
| OSBPL3  | -0.192 | 0.297 | -0.646 | 0.518 | 0.825 | 0.245 | -0.712 | 0.476 | 0.461 | 1.478 |
| OSBPL2  | 0.36   | 0.298 | 1.21   | 0.226 | 1.434 | 0.427 | 1.016  | 0.31  | 0.8   | 2.569 |

|          |        |       |        |       |       |       |        |       |       |       |
|----------|--------|-------|--------|-------|-------|-------|--------|-------|-------|-------|
| OSBPL1A  | -0.821 | 0.321 | -2.556 | 0.011 | 0.44  | 0.141 | -3.962 | 0     | 0.235 | 0.826 |
| OSBPL11  | 0.492  | 0.3   | 1.64   | 0.101 | 1.635 | 0.49  | 1.295  | 0.195 | 0.908 | 2.943 |
| OSBPL10  | 0.23   | 0.296 | 0.776  | 0.438 | 1.258 | 0.373 | 0.693  | 0.488 | 0.704 | 2.249 |
| OSBP2    | -0.463 | 0.3   | -1.544 | 0.123 | 0.63  | 0.189 | -1.963 | 0.05  | 0.35  | 1.133 |
| OSBP     | 0.035  | 0.295 | 0.118  | 0.906 | 1.035 | 0.305 | 0.116  | 0.908 | 0.581 | 1.846 |
| OS9      | -0.954 | 0.314 | -3.039 | 0.002 | 0.385 | 0.121 | -5.084 | 0     | 0.208 | 0.713 |
| ORMDL2   | 0.147  | 0.295 | 0.497  | 0.619 | 1.158 | 0.342 | 0.462  | 0.644 | 0.649 | 2.066 |
| ORM1     | 0.053  | 0.295 | 0.181  | 0.856 | 1.055 | 0.312 | 0.176  | 0.86  | 0.591 | 1.882 |
| ORC6     | 0.866  | 0.321 | 2.698  | 0.007 | 2.378 | 0.763 | 1.805  | 0.071 | 1.267 | 4.461 |
| ORC5     | -0.287 | 0.298 | -0.964 | 0.335 | 0.751 | 0.223 | -1.117 | 0.264 | 0.419 | 1.345 |
| ORC4     | 0.469  | 0.302 | 1.552  | 0.121 | 1.599 | 0.484 | 1.239  | 0.215 | 0.884 | 2.893 |
| ORC3     | 0.164  | 0.296 | 0.554  | 0.58  | 1.178 | 0.348 | 0.511  | 0.609 | 0.66  | 2.103 |
| ORC2     | 0.14   | 0.295 | 0.473  | 0.636 | 1.15  | 0.34  | 0.441  | 0.659 | 0.644 | 2.052 |
| ORC1     | 0.614  | 0.306 | 2.009  | 0.045 | 1.848 | 0.565 | 1.501  | 0.133 | 1.015 | 3.365 |
| ORAI3    | -0.125 | 0.295 | -0.423 | 0.673 | 0.883 | 0.261 | -0.45  | 0.653 | 0.495 | 1.574 |
| ORAI2    | -0.326 | 0.3   | -1.085 | 0.278 | 0.722 | 0.217 | -1.283 | 0.199 | 0.401 | 1.3   |
| OR7E47P  | 0.295  | 0.297 | 0.993  | 0.321 | 1.342 | 0.398 | 0.86   | 0.39  | 0.751 | 2.401 |
| OR7E2P   | -0.575 | 0.306 | -1.882 | 0.06  | 0.563 | 0.172 | -2.543 | 0.011 | 0.309 | 1.024 |
| OR7E24   | 0.114  | 0.296 | 0.387  | 0.699 | 1.121 | 0.331 | 0.365  | 0.715 | 0.628 | 2.001 |
| OR7E19P  | -0.441 | 0.3   | -1.47  | 0.142 | 0.643 | 0.193 | -1.848 | 0.065 | 0.357 | 1.158 |
| OR7E156P | 0.237  | 0.298 | 0.798  | 0.425 | 1.268 | 0.378 | 0.71   | 0.478 | 0.707 | 2.273 |
| OR7E14P  | 0.273  | 0.297 | 0.919  | 0.358 | 1.314 | 0.39  | 0.804  | 0.421 | 0.734 | 2.352 |
| OR7E12P  | 0.292  | 0.298 | 0.98   | 0.327 | 1.339 | 0.398 | 0.85   | 0.395 | 0.747 | 2.399 |
| OR7C2    | -0.632 | 0.306 | -2.067 | 0.039 | 0.531 | 0.163 | -2.883 | 0.004 | 0.292 | 0.968 |
| OR7C1    | 0.372  | 0.298 | 1.249  | 0.212 | 1.451 | 0.432 | 1.043  | 0.297 | 0.809 | 2.601 |
| OR7A5    | 0.527  | 0.307 | 1.719  | 0.086 | 1.694 | 0.519 | 1.336  | 0.181 | 0.929 | 3.09  |
| OR7A17   | -0.224 | 0.297 | -0.755 | 0.45  | 0.799 | 0.237 | -0.846 | 0.397 | 0.447 | 1.43  |
| OR7A10   | 0.146  | 0.297 | 0.492  | 0.623 | 1.157 | 0.343 | 0.458  | 0.647 | 0.647 | 2.07  |
| OR6A2    | -0.027 | 0.297 | -0.089 | 0.929 | 0.974 | 0.289 | -0.091 | 0.928 | 0.544 | 1.743 |
| OR5I1    | 0.062  | 0.295 | 0.209  | 0.834 | 1.064 | 0.314 | 0.203  | 0.839 | 0.596 | 1.898 |
| OR52A1   | 0.136  | 0.296 | 0.46   | 0.645 | 1.146 | 0.34  | 0.43   | 0.667 | 0.641 | 2.048 |
| OR51E2   | 0.254  | 0.298 | 0.853  | 0.393 | 1.289 | 0.384 | 0.754  | 0.451 | 0.719 | 2.31  |
| OR3A3    | 0.459  | 0.303 | 1.516  | 0.129 | 1.582 | 0.479 | 1.216  | 0.224 | 0.874 | 2.863 |
| OR3A2    | 0.406  | 0.303 | 1.343  | 0.179 | 1.501 | 0.454 | 1.104  | 0.27  | 0.83  | 2.716 |
| OR3A1    | -0.117 | 0.295 | -0.395 | 0.693 | 0.89  | 0.263 | -0.419 | 0.675 | 0.499 | 1.588 |
| OR2W1    | 0.026  | 0.295 | 0.088  | 0.93  | 1.026 | 0.303 | 0.087  | 0.931 | 0.576 | 1.83  |
| OR2S2    | 0.03   | 0.295 | 0.102  | 0.919 | 1.031 | 0.304 | 0.1    | 0.92  | 0.578 | 1.838 |
| OR2J3    | -0.159 | 0.295 | -0.537 | 0.591 | 0.853 | 0.252 | -0.582 | 0.56  | 0.478 | 1.522 |

|         |        |       |        |       |       |       |        |       |       |       |
|---------|--------|-------|--------|-------|-------|-------|--------|-------|-------|-------|
| OR2J2   | 0.202  | 0.296 | 0.682  | 0.495 | 1.224 | 0.362 | 0.617  | 0.537 | 0.685 | 2.186 |
| OR2H2   | -0.058 | 0.296 | -0.197 | 0.844 | 0.943 | 0.279 | -0.203 | 0.839 | 0.529 | 1.684 |
| OR2H1   | 0.042  | 0.296 | 0.142  | 0.887 | 1.043 | 0.308 | 0.139  | 0.889 | 0.584 | 1.862 |
| OR2F2   | 0.091  | 0.295 | 0.307  | 0.759 | 1.095 | 0.323 | 0.294  | 0.769 | 0.614 | 1.952 |
| OR2F1   | 0.069  | 0.296 | 0.232  | 0.816 | 1.071 | 0.317 | 0.225  | 0.822 | 0.6   | 1.912 |
| OR2C1   | 0.088  | 0.296 | 0.297  | 0.767 | 1.092 | 0.324 | 0.284  | 0.776 | 0.611 | 1.952 |
| OR2B6   | 0.155  | 0.295 | 0.524  | 0.6   | 1.167 | 0.345 | 0.486  | 0.627 | 0.654 | 2.083 |
| OR2B2   | -0.083 | 0.296 | -0.28  | 0.78  | 0.921 | 0.272 | -0.292 | 0.771 | 0.516 | 1.644 |
| OR1G1   | -0.33  | 0.298 | -1.107 | 0.268 | 0.719 | 0.214 | -1.311 | 0.19  | 0.401 | 1.289 |
| OR1F2P  | 0.182  | 0.296 | 0.613  | 0.54  | 1.199 | 0.355 | 0.561  | 0.575 | 0.671 | 2.144 |
| OR1F1   | 0.533  | 0.302 | 1.764  | 0.078 | 1.704 | 0.515 | 1.367  | 0.172 | 0.942 | 3.082 |
| OR1E1   | -0.131 | 0.295 | -0.445 | 0.657 | 0.877 | 0.259 | -0.475 | 0.635 | 0.492 | 1.564 |
| OR1D2   | 0.02   | 0.295 | 0.069  | 0.945 | 1.021 | 0.301 | 0.068  | 0.946 | 0.572 | 1.82  |
| OR1A2   | 0.203  | 0.296 | 0.685  | 0.493 | 1.225 | 0.363 | 0.62   | 0.535 | 0.685 | 2.19  |
| OR1A1   | -0.42  | 0.3   | -1.399 | 0.162 | 0.657 | 0.197 | -1.738 | 0.082 | 0.365 | 1.184 |
| OR12D3  | -0.101 | 0.296 | -0.342 | 0.733 | 0.904 | 0.267 | -0.359 | 0.719 | 0.507 | 1.613 |
| OR12D2  | 0.124  | 0.295 | 0.419  | 0.675 | 1.132 | 0.334 | 0.394  | 0.693 | 0.634 | 2.019 |
| OR11A1  | 0.014  | 0.295 | 0.049  | 0.961 | 1.014 | 0.299 | 0.048  | 0.961 | 0.569 | 1.809 |
| OR10J1  | -0.371 | 0.3   | -1.236 | 0.217 | 0.69  | 0.207 | -1.496 | 0.135 | 0.384 | 1.243 |
| OR10H3  | -0.412 | 0.3   | -1.373 | 0.17  | 0.662 | 0.199 | -1.7   | 0.089 | 0.368 | 1.192 |
| OR10H2  | 0.788  | 0.31  | 2.542  | 0.011 | 2.199 | 0.682 | 1.759  | 0.079 | 1.198 | 4.036 |
| OR10H1  | 0.036  | 0.295 | 0.122  | 0.903 | 1.037 | 0.306 | 0.12   | 0.905 | 0.581 | 1.848 |
| OR10C1  | 0.136  | 0.296 | 0.459  | 0.646 | 1.146 | 0.339 | 0.429  | 0.668 | 0.641 | 2.048 |
| OPTN    | 0.657  | 0.306 | 2.147  | 0.032 | 1.929 | 0.59  | 1.573  | 0.116 | 1.059 | 3.515 |
| OPRPN   | -0.308 | 0.298 | -1.035 | 0.3   | 0.735 | 0.219 | -1.213 | 0.225 | 0.41  | 1.317 |
| OPRM1   | 0.4    | 0.3   | 1.333  | 0.182 | 1.491 | 0.447 | 1.099  | 0.272 | 0.829 | 2.683 |
| OPRL1   | 0.059  | 0.296 | 0.199  | 0.842 | 1.061 | 0.314 | 0.194  | 0.846 | 0.594 | 1.894 |
| OPRK1   | 0.396  | 0.3   | 1.317  | 0.188 | 1.485 | 0.446 | 1.088  | 0.277 | 0.824 | 2.677 |
| OPRD1   | -0.588 | 0.303 | -1.942 | 0.052 | 0.556 | 0.168 | -2.643 | 0.008 | 0.307 | 1.005 |
| OPN3    | 0.291  | 0.298 | 0.978  | 0.328 | 1.338 | 0.398 | 0.848  | 0.396 | 0.746 | 2.397 |
| OPN1SW  | 0.233  | 0.296 | 0.787  | 0.431 | 1.263 | 0.374 | 0.702  | 0.483 | 0.707 | 2.256 |
| OPLAH   | 0.197  | 0.296 | 0.666  | 0.506 | 1.218 | 0.361 | 0.604  | 0.546 | 0.682 | 2.176 |
| OPHN1   | 0.062  | 0.295 | 0.21   | 0.834 | 1.064 | 0.314 | 0.204  | 0.839 | 0.597 | 1.897 |
| OPCML   | -0.934 | 0.321 | -2.911 | 0.004 | 0.393 | 0.126 | -4.815 | 0     | 0.209 | 0.737 |
| OPA3    | 0.627  | 0.306 | 2.051  | 0.04  | 1.872 | 0.573 | 1.523  | 0.128 | 1.028 | 3.409 |
| OPA1    | 0.462  | 0.303 | 1.526  | 0.127 | 1.587 | 0.48  | 1.223  | 0.221 | 0.877 | 2.871 |
| ONECUT2 | 0.188  | 0.296 | 0.634  | 0.526 | 1.206 | 0.357 | 0.578  | 0.563 | 0.675 | 2.156 |
| ONECUT1 | -0.018 | 0.296 | -0.061 | 0.952 | 0.982 | 0.29  | -0.061 | 0.951 | 0.55  | 1.753 |

|         |        |       |        |       |       |       |        |       |       |       |
|---------|--------|-------|--------|-------|-------|-------|--------|-------|-------|-------|
| OMP     | 0.299  | 0.297 | 1.006  | 0.315 | 1.349 | 0.401 | 0.869  | 0.385 | 0.753 | 2.416 |
| OMD     | -1.257 | 0.337 | -3.735 | 0     | 0.284 | 0.096 | -7.475 | 0     | 0.147 | 0.55  |
| OLR1    | 0.243  | 0.296 | 0.821  | 0.412 | 1.275 | 0.378 | 0.728  | 0.466 | 0.713 | 2.28  |
| OLIG2   | -0.287 | 0.296 | -0.966 | 0.334 | 0.751 | 0.223 | -1.119 | 0.263 | 0.42  | 1.343 |
| OLFML3  | -0.862 | 0.315 | -2.739 | 0.006 | 0.422 | 0.133 | -4.347 | 0     | 0.228 | 0.782 |
| OLFML2B | -0.576 | 0.302 | -1.906 | 0.057 | 0.562 | 0.17  | -2.577 | 0.01  | 0.311 | 1.017 |
| OLFML2A | -0.561 | 0.306 | -1.834 | 0.067 | 0.571 | 0.174 | -2.459 | 0.014 | 0.314 | 1.039 |
| OLFML1  | -0.541 | 0.302 | -1.789 | 0.074 | 0.582 | 0.176 | -2.373 | 0.018 | 0.322 | 1.053 |
| OLFM4   | -0.04  | 0.295 | -0.135 | 0.892 | 0.961 | 0.283 | -0.138 | 0.89  | 0.539 | 1.713 |
| OLFM1   | -0.105 | 0.296 | -0.353 | 0.724 | 0.901 | 0.267 | -0.372 | 0.71  | 0.504 | 1.61  |
| OLAH    | 0.187  | 0.296 | 0.633  | 0.527 | 1.206 | 0.357 | 0.577  | 0.564 | 0.675 | 2.155 |
| OLA1    | 0.147  | 0.295 | 0.496  | 0.62  | 1.158 | 0.342 | 0.461  | 0.645 | 0.649 | 2.066 |
| OIP5    | 0.398  | 0.3   | 1.328  | 0.184 | 1.489 | 0.446 | 1.095  | 0.273 | 0.827 | 2.679 |
| OGT     | 0.242  | 0.298 | 0.813  | 0.416 | 1.274 | 0.379 | 0.722  | 0.47  | 0.711 | 2.283 |
| OGN     | -1.027 | 0.321 | -3.198 | 0.001 | 0.358 | 0.115 | -5.581 | 0     | 0.191 | 0.672 |
| OGG1    | -0.225 | 0.296 | -0.76  | 0.447 | 0.798 | 0.237 | -0.852 | 0.394 | 0.447 | 1.427 |
| OGFRL1  | 0.752  | 0.315 | 2.39   | 0.017 | 2.121 | 0.667 | 1.68   | 0.093 | 1.145 | 3.93  |
| OGFR    | -0.344 | 0.298 | -1.154 | 0.248 | 0.709 | 0.211 | -1.378 | 0.168 | 0.395 | 1.271 |
| OGFOD3  | 0.38   | 0.298 | 1.275  | 0.202 | 1.462 | 0.436 | 1.06   | 0.289 | 0.815 | 2.623 |
| OGFOD2  | -0.051 | 0.297 | -0.171 | 0.864 | 0.95  | 0.282 | -0.176 | 0.86  | 0.531 | 1.701 |
| OGFOD1  | -0.249 | 0.297 | -0.838 | 0.402 | 0.78  | 0.232 | -0.951 | 0.341 | 0.435 | 1.396 |
| OGDHL   | -0.146 | 0.296 | -0.494 | 0.621 | 0.864 | 0.256 | -0.532 | 0.594 | 0.483 | 1.543 |
| OGDH    | -0.358 | 0.3   | -1.195 | 0.232 | 0.699 | 0.209 | -1.438 | 0.151 | 0.388 | 1.258 |
| OGA     | -0.324 | 0.299 | -1.085 | 0.278 | 0.723 | 0.216 | -1.282 | 0.2   | 0.402 | 1.299 |
| OFD1    | 0.375  | 0.3   | 1.25   | 0.211 | 1.454 | 0.436 | 1.043  | 0.297 | 0.809 | 2.616 |
| ODR4    | 0.074  | 0.295 | 0.251  | 0.802 | 1.077 | 0.318 | 0.242  | 0.809 | 0.604 | 1.921 |
| ODF2    | -0.731 | 0.321 | -2.276 | 0.023 | 0.481 | 0.155 | -3.354 | 0.001 | 0.256 | 0.903 |
| ODF1    | 0.031  | 0.296 | 0.103  | 0.918 | 1.031 | 0.305 | 0.102  | 0.919 | 0.577 | 1.842 |
| ODC1    | -0.252 | 0.298 | -0.846 | 0.398 | 0.778 | 0.231 | -0.961 | 0.336 | 0.434 | 1.393 |
| ODAM    | 0.308  | 0.3   | 1.027  | 0.304 | 1.361 | 0.408 | 0.884  | 0.377 | 0.756 | 2.449 |
| OCRL    | 0.431  | 0.3   | 1.437  | 0.151 | 1.538 | 0.461 | 1.167  | 0.243 | 0.855 | 2.769 |
| OCM2    | 0.167  | 0.295 | 0.564  | 0.573 | 1.181 | 0.349 | 0.52   | 0.603 | 0.662 | 2.107 |
| OCLN    | -0.054 | 0.297 | -0.183 | 0.855 | 0.947 | 0.281 | -0.188 | 0.851 | 0.529 | 1.696 |
| OCEL1   | 0.416  | 0.301 | 1.384  | 0.166 | 1.516 | 0.456 | 1.132  | 0.258 | 0.841 | 2.735 |
| OCA2    | -0.481 | 0.306 | -1.572 | 0.116 | 0.618 | 0.189 | -2.02  | 0.043 | 0.339 | 1.126 |
| OBSL1   | 0.154  | 0.296 | 0.52   | 0.603 | 1.166 | 0.345 | 0.482  | 0.63  | 0.653 | 2.084 |
| OBSCN   | -0.015 | 0.295 | -0.052 | 0.958 | 0.985 | 0.291 | -0.053 | 0.958 | 0.552 | 1.756 |
| OBP2A   | -0.243 | 0.296 | -0.819 | 0.413 | 0.784 | 0.232 | -0.927 | 0.354 | 0.439 | 1.402 |

|         |        |       |        |       |       |       |        |       |       |       |
|---------|--------|-------|--------|-------|-------|-------|--------|-------|-------|-------|
| OBI1    | 0.215  | 0.296 | 0.725  | 0.468 | 1.24  | 0.367 | 0.653  | 0.514 | 0.694 | 2.215 |
| OAZ3    | -0.312 | 0.298 | -1.049 | 0.294 | 0.732 | 0.218 | -1.231 | 0.218 | 0.409 | 1.311 |
| OAZ2    | -0.212 | 0.297 | -0.716 | 0.474 | 0.809 | 0.24  | -0.798 | 0.425 | 0.452 | 1.446 |
| OAZ1    | 0.535  | 0.306 | 1.749  | 0.08  | 1.707 | 0.522 | 1.354  | 0.176 | 0.937 | 3.107 |
| OAT     | -0.048 | 0.295 | -0.164 | 0.87  | 0.953 | 0.281 | -0.168 | 0.867 | 0.534 | 1.7   |
| OASL    | 0.164  | 0.297 | 0.551  | 0.581 | 1.178 | 0.349 | 0.509  | 0.611 | 0.659 | 2.106 |
| OAS3    | 0.038  | 0.296 | 0.128  | 0.898 | 1.039 | 0.307 | 0.126  | 0.9   | 0.582 | 1.854 |
| OAS2    | -0.131 | 0.296 | -0.445 | 0.657 | 0.877 | 0.259 | -0.475 | 0.635 | 0.491 | 1.565 |
| OAS1    | 0.006  | 0.296 | 0.019  | 0.985 | 1.006 | 0.297 | 0.019  | 0.985 | 0.563 | 1.796 |
| OARD1   | 0.035  | 0.295 | 0.12   | 0.905 | 1.036 | 0.306 | 0.118  | 0.906 | 0.581 | 1.848 |
| NYX     | 0.023  | 0.296 | 0.077  | 0.939 | 1.023 | 0.303 | 0.076  | 0.94  | 0.573 | 1.827 |
| NYNRIN  | 0.636  | 0.306 | 2.081  | 0.037 | 1.889 | 0.578 | 1.54   | 0.124 | 1.038 | 3.44  |
| NXT2    | -0.252 | 0.298 | -0.845 | 0.398 | 0.778 | 0.231 | -0.961 | 0.336 | 0.434 | 1.393 |
| NXT1    | 0.398  | 0.298 | 1.337  | 0.181 | 1.489 | 0.443 | 1.103  | 0.27  | 0.831 | 2.668 |
| NXPH4   | -0.063 | 0.295 | -0.213 | 0.831 | 0.939 | 0.277 | -0.22  | 0.826 | 0.526 | 1.675 |
| NXPH3   | -0.584 | 0.302 | -1.933 | 0.053 | 0.558 | 0.168 | -2.625 | 0.009 | 0.308 | 1.008 |
| NXPE4   | -0.554 | 0.306 | -1.814 | 0.07  | 0.575 | 0.176 | -2.423 | 0.015 | 0.316 | 1.046 |
| NXPE3   | -0.016 | 0.296 | -0.053 | 0.958 | 0.984 | 0.291 | -0.054 | 0.957 | 0.551 | 1.757 |
| NXF3    | -0.271 | 0.296 | -0.917 | 0.359 | 0.762 | 0.226 | -1.053 | 0.292 | 0.427 | 1.362 |
| NXF1    | -0.651 | 0.307 | -2.121 | 0.034 | 0.522 | 0.16  | -2.989 | 0.003 | 0.286 | 0.952 |
| NVL     | 0.226  | 0.296 | 0.764  | 0.445 | 1.254 | 0.371 | 0.684  | 0.494 | 0.702 | 2.24  |
| NUTF2   | 0.743  | 0.31  | 2.398  | 0.016 | 2.102 | 0.651 | 1.692  | 0.091 | 1.145 | 3.859 |
| NUSAP1  | 0.717  | 0.306 | 2.345  | 0.019 | 2.048 | 0.626 | 1.674  | 0.094 | 1.125 | 3.728 |
| NUS1P3  | -0.054 | 0.295 | -0.184 | 0.854 | 0.947 | 0.279 | -0.189 | 0.85  | 0.531 | 1.689 |
| NUPR1   | -0.135 | 0.296 | -0.455 | 0.649 | 0.874 | 0.259 | -0.487 | 0.626 | 0.489 | 1.562 |
| NUP98   | -0.311 | 0.298 | -1.042 | 0.297 | 0.733 | 0.218 | -1.222 | 0.222 | 0.409 | 1.315 |
| NUP93   | 0.151  | 0.295 | 0.51   | 0.61  | 1.162 | 0.343 | 0.473  | 0.636 | 0.652 | 2.074 |
| NUP88   | 0.262  | 0.296 | 0.883  | 0.377 | 1.299 | 0.385 | 0.777  | 0.437 | 0.727 | 2.322 |
| NUP85   | 0.351  | 0.3   | 1.173  | 0.241 | 1.421 | 0.426 | 0.989  | 0.323 | 0.79  | 2.557 |
| NUP62CL | -0.594 | 0.31  | -1.916 | 0.055 | 0.552 | 0.171 | -2.617 | 0.009 | 0.301 | 1.014 |
| NUP62   | 0.456  | 0.3   | 1.521  | 0.128 | 1.577 | 0.472 | 1.221  | 0.222 | 0.877 | 2.837 |
| NUP58   | 0.123  | 0.295 | 0.418  | 0.676 | 1.131 | 0.334 | 0.393  | 0.694 | 0.634 | 2.019 |
| NUP54   | 0.448  | 0.3   | 1.496  | 0.135 | 1.566 | 0.469 | 1.206  | 0.228 | 0.87  | 2.816 |
| NUP50   | -0.291 | 0.298 | -0.98  | 0.327 | 0.747 | 0.222 | -1.137 | 0.255 | 0.417 | 1.339 |
| NUP43   | 0.363  | 0.3   | 1.211  | 0.226 | 1.438 | 0.431 | 1.015  | 0.31  | 0.799 | 2.587 |
| NUP42   | 0.021  | 0.295 | 0.07   | 0.944 | 1.021 | 0.301 | 0.07   | 0.944 | 0.573 | 1.821 |
| NUP37   | 0.63   | 0.303 | 2.077  | 0.038 | 1.878 | 0.57  | 1.541  | 0.123 | 1.036 | 3.403 |
| NUP214  | 0.127  | 0.3   | 0.424  | 0.671 | 1.136 | 0.34  | 0.398  | 0.69  | 0.631 | 2.043 |

|        |        |       |        |       |       |       |        |       |       |       |
|--------|--------|-------|--------|-------|-------|-------|--------|-------|-------|-------|
| NUP210 | -0.065 | 0.295 | -0.218 | 0.827 | 0.938 | 0.277 | -0.226 | 0.821 | 0.525 | 1.673 |
| NUP205 | 0.111  | 0.296 | 0.374  | 0.708 | 1.117 | 0.331 | 0.354  | 0.723 | 0.625 | 1.997 |
| NUP188 | -0.053 | 0.295 | -0.178 | 0.858 | 0.949 | 0.28  | -0.183 | 0.855 | 0.532 | 1.693 |
| NUP160 | 0.137  | 0.296 | 0.461  | 0.645 | 1.146 | 0.34  | 0.431  | 0.666 | 0.641 | 2.049 |
| NUP155 | 0.871  | 0.315 | 2.764  | 0.006 | 2.39  | 0.753 | 1.845  | 0.065 | 1.289 | 4.433 |
| NUP153 | 0.263  | 0.298 | 0.882  | 0.378 | 1.301 | 0.388 | 0.776  | 0.438 | 0.725 | 2.336 |
| NUP133 | 0.168  | 0.296 | 0.566  | 0.571 | 1.182 | 0.35  | 0.521  | 0.602 | 0.662 | 2.113 |
| NUP107 | 0.446  | 0.303 | 1.47   | 0.141 | 1.561 | 0.473 | 1.186  | 0.235 | 0.862 | 2.827 |
| NUMA1  | -0.461 | 0.302 | -1.526 | 0.127 | 0.631 | 0.191 | -1.939 | 0.053 | 0.349 | 1.14  |
| NUFIP1 | 0.534  | 0.306 | 1.746  | 0.081 | 1.705 | 0.521 | 1.353  | 0.176 | 0.937 | 3.103 |
| NUDT9  | 0.502  | 0.3   | 1.674  | 0.094 | 1.651 | 0.495 | 1.316  | 0.188 | 0.918 | 2.971 |
| NUDT7  | -0.514 | 0.3   | -1.712 | 0.087 | 0.598 | 0.18  | -2.239 | 0.025 | 0.332 | 1.077 |
| NUDT6  | -0.569 | 0.311 | -1.833 | 0.067 | 0.566 | 0.176 | -2.47  | 0.014 | 0.308 | 1.04  |
| NUDT4  | -0.716 | 0.31  | -2.307 | 0.021 | 0.489 | 0.152 | -3.371 | 0.001 | 0.266 | 0.898 |
| NUDT3  | -0.149 | 0.296 | -0.502 | 0.616 | 0.862 | 0.255 | -0.541 | 0.588 | 0.483 | 1.54  |
| NUDT21 | 0.451  | 0.298 | 1.512  | 0.13  | 1.569 | 0.468 | 1.217  | 0.223 | 0.875 | 2.814 |
| NUDT2  | 0.286  | 0.298 | 0.961  | 0.336 | 1.332 | 0.397 | 0.836  | 0.403 | 0.743 | 2.388 |
| NUDT18 | -0.181 | 0.298 | -0.606 | 0.545 | 0.835 | 0.249 | -0.664 | 0.507 | 0.465 | 1.498 |
| NUDT15 | 0.3    | 0.298 | 1.007  | 0.314 | 1.349 | 0.402 | 0.87   | 0.384 | 0.753 | 2.419 |
| NUDT13 | -0.273 | 0.298 | -0.918 | 0.359 | 0.761 | 0.226 | -1.055 | 0.291 | 0.425 | 1.364 |
| NUDT11 | 0.052  | 0.295 | 0.177  | 0.86  | 1.054 | 0.311 | 0.172  | 0.863 | 0.59  | 1.88  |
| NUDT1  | 0.973  | 0.314 | 3.101  | 0.002 | 2.646 | 0.83  | 1.983  | 0.047 | 1.431 | 4.893 |
| NUDCD3 | 0.308  | 0.298 | 1.035  | 0.301 | 1.361 | 0.405 | 0.891  | 0.373 | 0.759 | 2.44  |
| NUDC   | -0.415 | 0.303 | -1.37  | 0.171 | 0.661 | 0.2   | -1.698 | 0.09  | 0.365 | 1.195 |
| NUCKS1 | 0.445  | 0.302 | 1.471  | 0.141 | 1.56  | 0.471 | 1.187  | 0.235 | 0.863 | 2.821 |
| NUCB2  | -0.028 | 0.296 | -0.096 | 0.924 | 0.972 | 0.287 | -0.097 | 0.923 | 0.545 | 1.735 |
| NUCB1  | -0.921 | 0.321 | -2.872 | 0.004 | 0.398 | 0.128 | -4.715 | 0     | 0.212 | 0.746 |
| NUBPL  | -0.028 | 0.296 | -0.093 | 0.926 | 0.973 | 0.288 | -0.094 | 0.925 | 0.545 | 1.736 |
| NUBP2  | 0.89   | 0.315 | 2.827  | 0.005 | 2.435 | 0.767 | 1.872  | 0.061 | 1.314 | 4.514 |
| NUBP1  | -0.006 | 0.297 | -0.022 | 0.983 | 0.994 | 0.295 | -0.022 | 0.983 | 0.555 | 1.778 |
| NUAK1  | -0.273 | 0.298 | -0.916 | 0.36  | 0.761 | 0.227 | -1.053 | 0.292 | 0.425 | 1.364 |
| NTSR2  | 0.273  | 0.298 | 0.916  | 0.36  | 1.314 | 0.391 | 0.802  | 0.423 | 0.733 | 2.355 |
| NTSR1  | 0.264  | 0.297 | 0.891  | 0.373 | 1.303 | 0.387 | 0.783  | 0.434 | 0.728 | 2.331 |
| NTS    | 0.016  | 0.295 | 0.056  | 0.956 | 1.017 | 0.3   | 0.055  | 0.956 | 0.57  | 1.814 |
| NTRK3  | 0.046  | 0.296 | 0.155  | 0.877 | 1.047 | 0.31  | 0.152  | 0.88  | 0.586 | 1.87  |
| NTRK2  | -0.242 | 0.298 | -0.812 | 0.417 | 0.785 | 0.234 | -0.919 | 0.358 | 0.438 | 1.407 |
| NTRK1  | -0.45  | 0.3   | -1.503 | 0.133 | 0.637 | 0.191 | -1.898 | 0.058 | 0.354 | 1.147 |
| NTNG1  | 0.089  | 0.295 | 0.301  | 0.763 | 1.093 | 0.323 | 0.288  | 0.773 | 0.613 | 1.95  |

|         |        |       |        |       |       |       |        |       |       |       |
|---------|--------|-------|--------|-------|-------|-------|--------|-------|-------|-------|
| NTN3    | 0.441  | 0.3   | 1.472  | 0.141 | 1.555 | 0.466 | 1.19   | 0.234 | 0.864 | 2.798 |
| NTN1    | -0.177 | 0.296 | -0.596 | 0.551 | 0.838 | 0.248 | -0.651 | 0.515 | 0.469 | 1.498 |
| NTM     | 0      | 0.296 | -0.001 | 0.999 | 1     | 0.296 | -0.001 | 0.999 | 0.56  | 1.785 |
| NTHL1   | 0.605  | 0.304 | 1.993  | 0.046 | 1.831 | 0.556 | 1.496  | 0.135 | 1.01  | 3.32  |
| NTF3    | -0.965 | 0.328 | -2.945 | 0.003 | 0.381 | 0.125 | -4.959 | 0     | 0.2   | 0.724 |
| NTAQ1   | 0.035  | 0.295 | 0.118  | 0.906 | 1.035 | 0.305 | 0.116  | 0.908 | 0.581 | 1.846 |
| NTAN1   | -0.008 | 0.297 | -0.026 | 0.979 | 0.992 | 0.294 | -0.026 | 0.979 | 0.555 | 1.775 |
| NT5M    | 0.035  | 0.296 | 0.119  | 0.906 | 1.036 | 0.306 | 0.117  | 0.907 | 0.58  | 1.85  |
| NT5E    | -0.156 | 0.295 | -0.53  | 0.596 | 0.855 | 0.253 | -0.573 | 0.566 | 0.479 | 1.526 |
| NT5DC3  | 0.375  | 0.3   | 1.25   | 0.211 | 1.455 | 0.436 | 1.043  | 0.297 | 0.808 | 2.618 |
| NT5DC2  | 0.537  | 0.303 | 1.775  | 0.076 | 1.711 | 0.518 | 1.373  | 0.17  | 0.946 | 3.097 |
| NT5C2   | 0.5    | 0.302 | 1.655  | 0.098 | 1.649 | 0.499 | 1.302  | 0.193 | 0.912 | 2.982 |
| NSUN7   | -0.148 | 0.296 | -0.499 | 0.618 | 0.862 | 0.256 | -0.538 | 0.591 | 0.482 | 1.542 |
| NSUN6   | 0.27   | 0.3   | 0.9    | 0.368 | 1.31  | 0.392 | 0.789  | 0.43  | 0.728 | 2.356 |
| NSUN5P1 | 0.263  | 0.298 | 0.881  | 0.378 | 1.3   | 0.388 | 0.775  | 0.438 | 0.725 | 2.333 |
| NSUN5   | 0.305  | 0.297 | 1.027  | 0.304 | 1.356 | 0.403 | 0.886  | 0.376 | 0.758 | 2.427 |
| NSUN3   | 0.329  | 0.297 | 1.11   | 0.267 | 1.39  | 0.412 | 0.945  | 0.344 | 0.777 | 2.486 |
| NSMCE4A | 0.003  | 0.299 | 0.012  | 0.991 | 1.003 | 0.3   | 0.012  | 0.991 | 0.558 | 1.804 |
| NSMAF   | 0.44   | 0.302 | 1.456  | 0.145 | 1.553 | 0.47  | 1.178  | 0.239 | 0.859 | 2.809 |
| NSL1    | 0.204  | 0.298 | 0.686  | 0.492 | 1.227 | 0.365 | 0.621  | 0.535 | 0.684 | 2.2   |
| NSG2    | 0.154  | 0.295 | 0.522  | 0.601 | 1.167 | 0.345 | 0.484  | 0.628 | 0.654 | 2.082 |
| NSG1    | -0.538 | 0.3   | -1.793 | 0.073 | 0.584 | 0.175 | -2.375 | 0.018 | 0.324 | 1.051 |
| NSFL1C  | 0.19   | 0.296 | 0.643  | 0.52  | 1.21  | 0.358 | 0.586  | 0.558 | 0.677 | 2.16  |
| NSF     | -0.328 | 0.298 | -1.101 | 0.271 | 0.72  | 0.215 | -1.303 | 0.193 | 0.401 | 1.292 |
| NSDHL   | 0.369  | 0.297 | 1.243  | 0.214 | 1.447 | 0.43  | 1.04   | 0.299 | 0.808 | 2.589 |
| NSD3    | -0.15  | 0.297 | -0.505 | 0.614 | 0.861 | 0.255 | -0.545 | 0.586 | 0.481 | 1.54  |
| NSD2    | 0.445  | 0.298 | 1.491  | 0.136 | 1.56  | 0.465 | 1.203  | 0.229 | 0.869 | 2.799 |
| NSD1    | 0.242  | 0.296 | 0.817  | 0.414 | 1.274 | 0.378 | 0.726  | 0.468 | 0.713 | 2.277 |
| NSA2    | -0.37  | 0.303 | -1.222 | 0.222 | 0.691 | 0.209 | -1.479 | 0.139 | 0.381 | 1.25  |
| NRXN3   | -0.293 | 0.3   | -0.979 | 0.328 | 0.746 | 0.224 | -1.137 | 0.255 | 0.414 | 1.342 |
| NRXN2   | 0.439  | 0.302 | 1.45   | 0.147 | 1.55  | 0.469 | 1.174  | 0.24  | 0.857 | 2.804 |
| NRXN1   | -0.228 | 0.296 | -0.771 | 0.441 | 0.796 | 0.236 | -0.866 | 0.386 | 0.445 | 1.422 |
| NRTN    | 0.176  | 0.297 | 0.594  | 0.553 | 1.193 | 0.354 | 0.544  | 0.586 | 0.667 | 2.133 |
| NRSN2   | -0.617 | 0.303 | -2.037 | 0.042 | 0.54  | 0.163 | -2.817 | 0.005 | 0.298 | 0.977 |
| NRP2    | -0.643 | 0.306 | -2.103 | 0.035 | 0.525 | 0.161 | -2.951 | 0.003 | 0.288 | 0.957 |
| NRP1    | -0.518 | 0.302 | -1.714 | 0.087 | 0.595 | 0.18  | -2.246 | 0.025 | 0.329 | 1.077 |
| NRN1    | -0.243 | 0.296 | -0.82  | 0.412 | 0.785 | 0.232 | -0.928 | 0.353 | 0.44  | 1.401 |
| NRL     | 0.934  | 0.313 | 2.981  | 0.003 | 2.546 | 0.798 | 1.937  | 0.053 | 1.377 | 4.706 |

|       |        |       |        |       |       |       |        |       |       |       |
|-------|--------|-------|--------|-------|-------|-------|--------|-------|-------|-------|
| NRIP3 | 0.394  | 0.298 | 1.321  | 0.186 | 1.483 | 0.443 | 1.092  | 0.275 | 0.826 | 2.663 |
| NRIP2 | -0.325 | 0.296 | -1.098 | 0.272 | 0.722 | 0.214 | -1.298 | 0.194 | 0.404 | 1.291 |
| NRIP1 | -0.383 | 0.304 | -1.262 | 0.207 | 0.682 | 0.207 | -1.538 | 0.124 | 0.376 | 1.236 |
| NRGN  | 0.2    | 0.298 | 0.672  | 0.502 | 1.222 | 0.364 | 0.609  | 0.543 | 0.681 | 2.19  |
| NRG2  | 0.279  | 0.298 | 0.937  | 0.349 | 1.322 | 0.393 | 0.818  | 0.413 | 0.738 | 2.368 |
| NRG1  | -0.22  | 0.297 | -0.739 | 0.46  | 0.803 | 0.239 | -0.826 | 0.409 | 0.448 | 1.438 |
| NRF1  | 0.167  | 0.296 | 0.563  | 0.573 | 1.181 | 0.35  | 0.519  | 0.604 | 0.661 | 2.111 |
| NREP  | -0.251 | 0.296 | -0.848 | 0.396 | 0.778 | 0.23  | -0.964 | 0.335 | 0.435 | 1.39  |
| NRDE2 | -0.301 | 0.298 | -1.01  | 0.313 | 0.74  | 0.221 | -1.178 | 0.239 | 0.413 | 1.327 |
| NRDC  | -0.353 | 0.299 | -1.18  | 0.238 | 0.703 | 0.21  | -1.415 | 0.157 | 0.391 | 1.263 |
| NRCAM | 0.191  | 0.295 | 0.647  | 0.517 | 1.211 | 0.358 | 0.589  | 0.556 | 0.679 | 2.161 |
| NRBP1 | 0.125  | 0.296 | 0.423  | 0.672 | 1.133 | 0.335 | 0.398  | 0.691 | 0.635 | 2.023 |
| NRBF2 | 0.55   | 0.302 | 1.819  | 0.069 | 1.733 | 0.524 | 1.399  | 0.162 | 0.958 | 3.135 |
| NRAS  | 0.462  | 0.3   | 1.538  | 0.124 | 1.587 | 0.476 | 1.232  | 0.218 | 0.881 | 2.858 |
| NRAP  | -0.278 | 0.296 | -0.94  | 0.347 | 0.757 | 0.224 | -1.084 | 0.278 | 0.424 | 1.353 |
| NR6A1 | -0.409 | 0.3   | -1.365 | 0.172 | 0.664 | 0.199 | -1.686 | 0.092 | 0.369 | 1.196 |
| NR5A2 | 0.047  | 0.295 | 0.159  | 0.874 | 1.048 | 0.309 | 0.155  | 0.877 | 0.588 | 1.87  |
| NR5A1 | 0.085  | 0.295 | 0.288  | 0.773 | 1.089 | 0.322 | 0.276  | 0.783 | 0.61  | 1.943 |
| NR4A3 | 0.231  | 0.296 | 0.781  | 0.435 | 1.26  | 0.373 | 0.697  | 0.486 | 0.705 | 2.251 |
| NR4A2 | -0.035 | 0.297 | -0.117 | 0.906 | 0.966 | 0.287 | -0.12  | 0.905 | 0.539 | 1.729 |
| NR4A1 | 0.581  | 0.306 | 1.901  | 0.057 | 1.788 | 0.546 | 1.442  | 0.149 | 0.982 | 3.254 |
| NR3C2 | -0.512 | 0.3   | -1.705 | 0.088 | 0.599 | 0.18  | -2.226 | 0.026 | 0.333 | 1.08  |
| NR3C1 | -0.238 | 0.296 | -0.804 | 0.421 | 0.788 | 0.233 | -0.908 | 0.364 | 0.441 | 1.408 |
| NR2F6 | 0.899  | 0.314 | 2.866  | 0.004 | 2.456 | 0.77  | 1.891  | 0.059 | 1.329 | 4.541 |
| NR2F2 | 0.35   | 0.3   | 1.168  | 0.243 | 1.419 | 0.425 | 0.985  | 0.325 | 0.789 | 2.552 |
| NR2E3 | -0.032 | 0.295 | -0.109 | 0.913 | 0.968 | 0.286 | -0.111 | 0.912 | 0.543 | 1.728 |
| NR2E1 | 0.244  | 0.297 | 0.821  | 0.412 | 1.276 | 0.378 | 0.729  | 0.466 | 0.713 | 2.282 |
| NR2C2 | 0.378  | 0.298 | 1.268  | 0.205 | 1.46  | 0.436 | 1.056  | 0.291 | 0.814 | 2.62  |
| NR2C1 | -0.459 | 0.302 | -1.518 | 0.129 | 0.632 | 0.191 | -1.926 | 0.054 | 0.349 | 1.143 |
| NR1I3 | -0.12  | 0.296 | -0.406 | 0.685 | 0.887 | 0.262 | -0.431 | 0.666 | 0.497 | 1.584 |
| NR1I2 | -0.391 | 0.302 | -1.295 | 0.195 | 0.676 | 0.204 | -1.585 | 0.113 | 0.374 | 1.223 |
| NR1H4 | 0.305  | 0.298 | 1.024  | 0.306 | 1.356 | 0.403 | 0.883  | 0.377 | 0.757 | 2.43  |
| NR1H3 | -0.38  | 0.298 | -1.272 | 0.203 | 0.684 | 0.204 | -1.547 | 0.122 | 0.381 | 1.228 |
| NR1H2 | -0.34  | 0.3   | -1.135 | 0.257 | 0.712 | 0.213 | -1.351 | 0.177 | 0.395 | 1.281 |
| NR1D2 | -0.23  | 0.298 | -0.773 | 0.439 | 0.794 | 0.237 | -0.869 | 0.385 | 0.443 | 1.424 |
| NR0B2 | 0.331  | 0.298 | 1.11   | 0.267 | 1.392 | 0.415 | 0.945  | 0.344 | 0.776 | 2.496 |
| NR0B1 | 0.219  | 0.296 | 0.74   | 0.459 | 1.245 | 0.369 | 0.665  | 0.506 | 0.697 | 2.225 |
| NQO2  | 0.234  | 0.298 | 0.786  | 0.432 | 1.264 | 0.376 | 0.701  | 0.483 | 0.705 | 2.264 |



|          |        |       |        |       |       |       |        |       |       |       |
|----------|--------|-------|--------|-------|-------|-------|--------|-------|-------|-------|
| NQO1     | 0.684  | 0.31  | 2.208  | 0.027 | 1.982 | 0.614 | 1.6    | 0.11  | 1.08  | 3.636 |
| NPY6R    | 0.027  | 0.296 | 0.09   | 0.928 | 1.027 | 0.304 | 0.089  | 0.929 | 0.575 | 1.836 |
| NPY5R    | 0.214  | 0.298 | 0.72   | 0.472 | 1.239 | 0.369 | 0.648  | 0.517 | 0.691 | 2.22  |
| NPY2R    | 0.439  | 0.303 | 1.45   | 0.147 | 1.551 | 0.47  | 1.173  | 0.241 | 0.857 | 2.809 |
| NPY1R    | 0.091  | 0.296 | 0.308  | 0.758 | 1.095 | 0.324 | 0.294  | 0.769 | 0.613 | 1.956 |
| NPY      | 0.044  | 0.296 | 0.15   | 0.881 | 1.045 | 0.309 | 0.147  | 0.883 | 0.586 | 1.866 |
| NPVF     | 0.466  | 0.3   | 1.556  | 0.12  | 1.594 | 0.478 | 1.244  | 0.214 | 0.886 | 2.868 |
| NPTXR    | 0.002  | 0.295 | 0.005  | 0.996 | 1.002 | 0.296 | 0.005  | 0.996 | 0.562 | 1.786 |
| NPTX2    | -0.945 | 0.328 | -2.884 | 0.004 | 0.389 | 0.127 | -4.798 | 0     | 0.205 | 0.739 |
| NPTX1    | -0.354 | 0.3   | -1.181 | 0.238 | 0.702 | 0.21  | -1.417 | 0.157 | 0.39  | 1.263 |
| NPTN     | 0.328  | 0.298 | 1.102  | 0.27  | 1.388 | 0.413 | 0.94   | 0.347 | 0.775 | 2.487 |
| NPRL3    | 0.045  | 0.298 | 0.151  | 0.88  | 1.046 | 0.312 | 0.147  | 0.883 | 0.583 | 1.876 |
| NPRL2    | -0.6   | 0.31  | -1.937 | 0.053 | 0.549 | 0.17  | -2.654 | 0.008 | 0.299 | 1.007 |
| NPR3     | 0.313  | 0.298 | 1.049  | 0.294 | 1.367 | 0.408 | 0.9    | 0.368 | 0.762 | 2.453 |
| NPR2     | 0.142  | 0.296 | 0.481  | 0.63  | 1.153 | 0.341 | 0.449  | 0.654 | 0.646 | 2.058 |
| NPR1     | -0.635 | 0.306 | -2.076 | 0.038 | 0.53  | 0.162 | -2.9   | 0.004 | 0.291 | 0.965 |
| NPPC     | -0.173 | 0.296 | -0.585 | 0.559 | 0.841 | 0.249 | -0.639 | 0.523 | 0.471 | 1.503 |
| NPPB     | 0.119  | 0.295 | 0.404  | 0.686 | 1.127 | 0.333 | 0.381  | 0.703 | 0.632 | 2.01  |
| NPPA     | 0.33   | 0.298 | 1.107  | 0.268 | 1.391 | 0.415 | 0.943  | 0.346 | 0.775 | 2.495 |
| NPM3     | 0.37   | 0.298 | 1.24   | 0.215 | 1.447 | 0.431 | 1.037  | 0.3   | 0.807 | 2.596 |
| NPM1     | 0.157  | 0.297 | 0.528  | 0.598 | 1.17  | 0.347 | 0.488  | 0.625 | 0.654 | 2.092 |
| NPLOC4   | 0.268  | 0.296 | 0.904  | 0.366 | 1.307 | 0.387 | 0.793  | 0.428 | 0.732 | 2.336 |
| NPL      | 0.035  | 0.295 | 0.117  | 0.907 | 1.035 | 0.305 | 0.115  | 0.908 | 0.581 | 1.846 |
| NPIP15   | 0.403  | 0.299 | 1.351  | 0.177 | 1.497 | 0.447 | 1.112  | 0.266 | 0.834 | 2.687 |
| NPIPA1   | -0.121 | 0.296 | -0.409 | 0.683 | 0.886 | 0.262 | -0.434 | 0.664 | 0.496 | 1.582 |
| NPHS2    | 0.051  | 0.295 | 0.173  | 0.862 | 1.052 | 0.311 | 0.169  | 0.866 | 0.59  | 1.877 |
| NPHS1    | 0.516  | 0.302 | 1.705  | 0.088 | 1.675 | 0.507 | 1.332  | 0.183 | 0.926 | 3.03  |
| NPHP4    | 0.512  | 0.302 | 1.694  | 0.09  | 1.668 | 0.504 | 1.325  | 0.185 | 0.923 | 3.017 |
| NPHP1    | -0.006 | 0.295 | -0.019 | 0.985 | 0.995 | 0.294 | -0.019 | 0.985 | 0.558 | 1.774 |
| NPFFR1   | 0.284  | 0.299 | 0.952  | 0.341 | 1.329 | 0.397 | 0.828  | 0.407 | 0.74  | 2.385 |
| NPFF     | -0.288 | 0.297 | -0.967 | 0.333 | 0.75  | 0.223 | -1.121 | 0.262 | 0.419 | 1.343 |
| NPEPPSP1 | -0.331 | 0.299 | -1.108 | 0.268 | 0.718 | 0.215 | -1.313 | 0.189 | 0.4   | 1.29  |
| NPEPPS   | 0.558  | 0.303 | 1.843  | 0.065 | 1.747 | 0.529 | 1.413  | 0.158 | 0.965 | 3.161 |
| NPEPL1   | 0.275  | 0.298 | 0.925  | 0.355 | 1.317 | 0.392 | 0.808  | 0.419 | 0.735 | 2.361 |
| NPDC1    | -0.254 | 0.298 | -0.852 | 0.394 | 0.776 | 0.231 | -0.97  | 0.332 | 0.433 | 1.391 |
| NPC2     | -0.104 | 0.295 | -0.351 | 0.725 | 0.901 | 0.266 | -0.37  | 0.711 | 0.505 | 1.608 |
| NPC1L1   | -0.301 | 0.298 | -1.011 | 0.312 | 0.74  | 0.22  | -1.18  | 0.238 | 0.413 | 1.326 |
| NPC1     | 0.017  | 0.295 | 0.057  | 0.955 | 1.017 | 0.3   | 0.056  | 0.955 | 0.57  | 1.813 |

|           |        |       |        |       |       |       |        |       |       |       |
|-----------|--------|-------|--------|-------|-------|-------|--------|-------|-------|-------|
| NPBWR2    | 0.474  | 0.302 | 1.568  | 0.117 | 1.607 | 0.486 | 1.249  | 0.212 | 0.888 | 2.908 |
| NPAT      | -0.48  | 0.3   | -1.601 | 0.109 | 0.619 | 0.186 | -2.054 | 0.04  | 0.344 | 1.114 |
| NPAS3     | -0.235 | 0.296 | -0.794 | 0.427 | 0.791 | 0.234 | -0.895 | 0.371 | 0.442 | 1.413 |
| NPAS2     | -0.357 | 0.298 | -1.199 | 0.23  | 0.7   | 0.208 | -1.441 | 0.15  | 0.391 | 1.254 |
| NPAS1     | -0.036 | 0.296 | -0.121 | 0.903 | 0.965 | 0.285 | -0.123 | 0.902 | 0.54  | 1.723 |
| NPAP1     | 0.132  | 0.3   | 0.442  | 0.659 | 1.142 | 0.342 | 0.414  | 0.679 | 0.634 | 2.054 |
| NOX5      | -0.225 | 0.298 | -0.755 | 0.45  | 0.799 | 0.238 | -0.846 | 0.398 | 0.446 | 1.431 |
| NOX4      | -0.22  | 0.296 | -0.744 | 0.457 | 0.802 | 0.238 | -0.833 | 0.405 | 0.449 | 1.433 |
| NOX3      | -0.075 | 0.297 | -0.254 | 0.8   | 0.927 | 0.276 | -0.263 | 0.792 | 0.518 | 1.661 |
| NOX1      | 0.213  | 0.298 | 0.716  | 0.474 | 1.238 | 0.369 | 0.645  | 0.519 | 0.69  | 2.219 |
| NOVA2     | 0.253  | 0.296 | 0.855  | 0.393 | 1.288 | 0.382 | 0.755  | 0.45  | 0.721 | 2.302 |
| NOVA1     | -0.491 | 0.302 | -1.623 | 0.105 | 0.612 | 0.185 | -2.095 | 0.036 | 0.339 | 1.107 |
| NOTCH4    | 0.341  | 0.298 | 1.145  | 0.252 | 1.406 | 0.419 | 0.97   | 0.332 | 0.784 | 2.521 |
| NOTCH3    | -0.057 | 0.296 | -0.193 | 0.847 | 0.944 | 0.28  | -0.199 | 0.843 | 0.528 | 1.688 |
| NOTCH2NLA | -0.318 | 0.298 | -1.069 | 0.285 | 0.727 | 0.217 | -1.258 | 0.208 | 0.406 | 1.304 |
| NOTCH2    | -0.197 | 0.297 | -0.663 | 0.508 | 0.821 | 0.244 | -0.732 | 0.464 | 0.459 | 1.47  |
| NOTCH1    | 0.347  | 0.303 | 1.143  | 0.253 | 1.415 | 0.429 | 0.966  | 0.334 | 0.781 | 2.563 |
| NOSIP     | 0.345  | 0.298 | 1.158  | 0.247 | 1.412 | 0.421 | 0.979  | 0.328 | 0.787 | 2.532 |
| NOS3      | -0.621 | 0.303 | -2.049 | 0.04  | 0.537 | 0.163 | -2.841 | 0.004 | 0.296 | 0.973 |
| NOS2      | 0.037  | 0.296 | 0.126  | 0.9   | 1.038 | 0.307 | 0.124  | 0.902 | 0.581 | 1.854 |
| NOS1AP    | -0.627 | 0.31  | -2.025 | 0.043 | 0.534 | 0.165 | -2.817 | 0.005 | 0.291 | 0.98  |
| NOS1      | -0.264 | 0.298 | -0.888 | 0.374 | 0.768 | 0.229 | -1.017 | 0.309 | 0.428 | 1.376 |
| NOP2      | 0.59   | 0.306 | 1.929  | 0.054 | 1.803 | 0.551 | 1.458  | 0.145 | 0.991 | 3.283 |
| NOP16     | 0.189  | 0.296 | 0.639  | 0.523 | 1.208 | 0.358 | 0.582  | 0.561 | 0.676 | 2.159 |
| NOP14-AS1 | 0.023  | 0.296 | 0.077  | 0.939 | 1.023 | 0.303 | 0.076  | 0.94  | 0.573 | 1.827 |
| NOP14     | 0.274  | 0.298 | 0.92   | 0.358 | 1.315 | 0.392 | 0.805  | 0.421 | 0.734 | 2.357 |
| NOP10     | 0.155  | 0.296 | 0.525  | 0.6   | 1.168 | 0.346 | 0.486  | 0.627 | 0.654 | 2.086 |
| NONO      | 0.333  | 0.298 | 1.12   | 0.263 | 1.396 | 0.415 | 0.952  | 0.341 | 0.779 | 2.501 |
| NOMO2     | 0.411  | 0.298 | 1.379  | 0.168 | 1.509 | 0.45  | 1.13   | 0.258 | 0.841 | 2.707 |
| NOLC1     | -0.051 | 0.295 | -0.174 | 0.862 | 0.95  | 0.281 | -0.178 | 0.859 | 0.533 | 1.695 |
| NOL9      | -0.306 | 0.298 | -1.028 | 0.304 | 0.736 | 0.219 | -1.203 | 0.229 | 0.411 | 1.32  |
| NOL8      | -0.289 | 0.298 | -0.97  | 0.332 | 0.749 | 0.223 | -1.125 | 0.261 | 0.418 | 1.343 |
| NOL7      | 0.877  | 0.311 | 2.822  | 0.005 | 2.403 | 0.747 | 1.879  | 0.06  | 1.307 | 4.418 |
| NOL6      | 0.288  | 0.298 | 0.969  | 0.333 | 1.334 | 0.397 | 0.842  | 0.4   | 0.745 | 2.391 |
| NOL4      | 0.649  | 0.306 | 2.123  | 0.034 | 1.914 | 0.585 | 1.562  | 0.118 | 1.051 | 3.484 |
| NOL3      | 0.184  | 0.297 | 0.619  | 0.536 | 1.202 | 0.356 | 0.566  | 0.572 | 0.672 | 2.149 |
| NOL12     | 0.155  | 0.296 | 0.524  | 0.601 | 1.168 | 0.346 | 0.485  | 0.628 | 0.654 | 2.086 |
| NOL11     | 0.471  | 0.302 | 1.557  | 0.119 | 1.601 | 0.484 | 1.242  | 0.214 | 0.885 | 2.895 |

|        |        |       |        |       |       |       |        |       |       |       |
|--------|--------|-------|--------|-------|-------|-------|--------|-------|-------|-------|
| NOL10  | -0.331 | 0.298 | -1.11  | 0.267 | 0.718 | 0.214 | -1.315 | 0.188 | 0.401 | 1.288 |
| NODAL  | 0.198  | 0.299 | 0.66   | 0.509 | 1.219 | 0.365 | 0.599  | 0.549 | 0.678 | 2.192 |
| NOD2   | 0.219  | 0.296 | 0.74   | 0.46  | 1.245 | 0.368 | 0.664  | 0.507 | 0.697 | 2.223 |
| NOD1   | -0.037 | 0.295 | -0.125 | 0.9   | 0.964 | 0.284 | -0.128 | 0.898 | 0.54  | 1.719 |
| NOCT   | 0.308  | 0.298 | 1.034  | 0.301 | 1.36  | 0.405 | 0.89   | 0.374 | 0.759 | 2.437 |
| NOC4L  | 0.337  | 0.298 | 1.132  | 0.258 | 1.401 | 0.417 | 0.961  | 0.337 | 0.782 | 2.511 |
| NOC3L  | 0.14   | 0.297 | 0.471  | 0.638 | 1.15  | 0.342 | 0.439  | 0.661 | 0.642 | 2.06  |
| NOC2L  | 0.377  | 0.3   | 1.254  | 0.21  | 1.457 | 0.438 | 1.045  | 0.296 | 0.809 | 2.625 |
| NNT    | 0.465  | 0.299 | 1.553  | 0.12  | 1.592 | 0.476 | 1.242  | 0.214 | 0.885 | 2.861 |
| NNMT   | -0.461 | 0.3   | -1.536 | 0.125 | 0.631 | 0.189 | -1.951 | 0.051 | 0.35  | 1.136 |
| NNAT   | 0.388  | 0.299 | 1.296  | 0.195 | 1.473 | 0.441 | 1.074  | 0.283 | 0.82  | 2.648 |
| NMUR1  | 0.218  | 0.297 | 0.735  | 0.462 | 1.244 | 0.369 | 0.66   | 0.509 | 0.695 | 2.226 |
| NMU    | 0.608  | 0.303 | 2.008  | 0.045 | 1.837 | 0.556 | 1.505  | 0.132 | 1.015 | 3.324 |
| NMT2   | 0.373  | 0.298 | 1.253  | 0.21  | 1.452 | 0.432 | 1.046  | 0.296 | 0.81  | 2.602 |
| NMT1   | 0.147  | 0.295 | 0.498  | 0.618 | 1.158 | 0.342 | 0.463  | 0.643 | 0.649 | 2.066 |
| NMRK2  | -0.116 | 0.295 | -0.393 | 0.694 | 0.89  | 0.263 | -0.417 | 0.677 | 0.499 | 1.588 |
| NMRK1  | -0.218 | 0.296 | -0.735 | 0.462 | 0.804 | 0.238 | -0.822 | 0.411 | 0.45  | 1.438 |
| NMNAT2 | -0.067 | 0.295 | -0.226 | 0.821 | 0.935 | 0.276 | -0.234 | 0.815 | 0.524 | 1.669 |
| NMI    | 0.169  | 0.296 | 0.57   | 0.569 | 1.184 | 0.35  | 0.525  | 0.6   | 0.663 | 2.114 |
| NME8   | -0.526 | 0.302 | -1.74  | 0.082 | 0.591 | 0.179 | -2.289 | 0.022 | 0.327 | 1.069 |
| NME7   | 0.086  | 0.298 | 0.289  | 0.772 | 1.09  | 0.324 | 0.277  | 0.782 | 0.608 | 1.953 |
| NME6   | 0.845  | 0.315 | 2.684  | 0.007 | 2.327 | 0.732 | 1.812  | 0.07  | 1.256 | 4.313 |
| NME5   | -0.245 | 0.298 | -0.822 | 0.411 | 0.783 | 0.233 | -0.931 | 0.352 | 0.437 | 1.404 |
| NME4   | -0.214 | 0.298 | -0.717 | 0.473 | 0.808 | 0.241 | -0.8   | 0.424 | 0.451 | 1.448 |
| NME3   | -0.218 | 0.298 | -0.732 | 0.464 | 0.804 | 0.24  | -0.817 | 0.414 | 0.448 | 1.442 |
| NME1   | 0.632  | 0.31  | 2.039  | 0.041 | 1.881 | 0.583 | 1.511  | 0.131 | 1.025 | 3.454 |
| NMD3   | 0.101  | 0.295 | 0.341  | 0.733 | 1.106 | 0.327 | 0.325  | 0.746 | 0.62  | 1.973 |
| NMBR   | -0.333 | 0.3   | -1.112 | 0.266 | 0.717 | 0.215 | -1.32  | 0.187 | 0.398 | 1.289 |
| NMB    | 0.62   | 0.303 | 2.045  | 0.041 | 1.859 | 0.564 | 1.524  | 0.128 | 1.026 | 3.369 |
| NLRX1  | -0.269 | 0.296 | -0.907 | 0.365 | 0.764 | 0.227 | -1.04  | 0.298 | 0.428 | 1.366 |
| NLRP3  | 0.237  | 0.296 | 0.799  | 0.424 | 1.267 | 0.375 | 0.712  | 0.477 | 0.709 | 2.264 |
| NLRP2  | 0.267  | 0.298 | 0.898  | 0.369 | 1.306 | 0.389 | 0.788  | 0.43  | 0.729 | 2.341 |
| NLRP1  | -0.547 | 0.301 | -1.817 | 0.069 | 0.579 | 0.174 | -2.419 | 0.016 | 0.321 | 1.044 |
| NLK    | 0.07   | 0.295 | 0.238  | 0.812 | 1.073 | 0.317 | 0.23   | 0.818 | 0.602 | 1.914 |
| NLGN4Y | 0.012  | 0.296 | 0.042  | 0.967 | 1.012 | 0.299 | 0.041  | 0.967 | 0.567 | 1.808 |
| NLGN4X | -0.12  | 0.295 | -0.406 | 0.685 | 0.887 | 0.262 | -0.431 | 0.666 | 0.497 | 1.582 |
| NLGN3  | 0.223  | 0.296 | 0.752  | 0.452 | 1.249 | 0.37  | 0.674  | 0.5   | 0.699 | 2.233 |
| NLGN1  | 0.196  | 0.296 | 0.66   | 0.509 | 1.216 | 0.36  | 0.6    | 0.549 | 0.68  | 2.173 |

|           |        |       |        |       |       |       |        |       |       |       |
|-----------|--------|-------|--------|-------|-------|-------|--------|-------|-------|-------|
| NLE1      | -0.128 | 0.297 | -0.43  | 0.667 | 0.88  | 0.261 | -0.459 | 0.646 | 0.492 | 1.574 |
| NKX6-1    | 0.201  | 0.297 | 0.678  | 0.498 | 1.223 | 0.363 | 0.614  | 0.539 | 0.683 | 2.188 |
| NKX3-2    | -0.027 | 0.295 | -0.09  | 0.928 | 0.974 | 0.288 | -0.092 | 0.927 | 0.546 | 1.737 |
| NKX3-1    | -0.164 | 0.298 | -0.551 | 0.582 | 0.849 | 0.253 | -0.599 | 0.549 | 0.473 | 1.522 |
| NKX2-8    | 0.192  | 0.297 | 0.647  | 0.518 | 1.211 | 0.359 | 0.589  | 0.556 | 0.677 | 2.166 |
| NKX2-5    | 0.202  | 0.296 | 0.681  | 0.496 | 1.224 | 0.362 | 0.617  | 0.537 | 0.685 | 2.186 |
| NKX2-2    | 0.44   | 0.302 | 1.455  | 0.146 | 1.553 | 0.47  | 1.177  | 0.239 | 0.858 | 2.809 |
| NKX2-1    | -0.028 | 0.295 | -0.095 | 0.924 | 0.972 | 0.287 | -0.097 | 0.923 | 0.545 | 1.734 |
| NKTR      | 0.329  | 0.3   | 1.1    | 0.272 | 1.39  | 0.417 | 0.937  | 0.349 | 0.773 | 2.501 |
| NKRF      | 0.203  | 0.298 | 0.682  | 0.495 | 1.225 | 0.365 | 0.617  | 0.537 | 0.683 | 2.197 |
| NKIRAS2   | 0.592  | 0.306 | 1.935  | 0.053 | 1.807 | 0.552 | 1.461  | 0.144 | 0.992 | 3.289 |
| NKG7      | -0.644 | 0.307 | -2.101 | 0.036 | 0.525 | 0.161 | -2.949 | 0.003 | 0.288 | 0.958 |
| NKAPD1    | 0.019  | 0.298 | 0.063  | 0.95  | 1.019 | 0.303 | 0.062  | 0.95  | 0.568 | 1.826 |
| NKAIN1    | 0.178  | 0.297 | 0.599  | 0.549 | 1.195 | 0.355 | 0.549  | 0.583 | 0.667 | 2.14  |
| NIT2      | 0.135  | 0.295 | 0.458  | 0.647 | 1.145 | 0.338 | 0.428  | 0.669 | 0.642 | 2.042 |
| NIT1      | 0.22   | 0.296 | 0.743  | 0.457 | 1.246 | 0.369 | 0.667  | 0.505 | 0.698 | 2.225 |
| NISCH     | -0.172 | 0.296 | -0.579 | 0.562 | 0.842 | 0.25  | -0.632 | 0.527 | 0.471 | 1.505 |
| NIPSNAP3B | 0.104  | 0.295 | 0.353  | 0.724 | 1.11  | 0.328 | 0.335  | 0.737 | 0.622 | 1.98  |
| NIPSNAP2  | 0.386  | 0.298 | 1.296  | 0.195 | 1.471 | 0.438 | 1.075  | 0.282 | 0.821 | 2.636 |
| NIPSNAP1  | 0.224  | 0.298 | 0.752  | 0.452 | 1.251 | 0.372 | 0.674  | 0.5   | 0.698 | 2.241 |
| NIPBL     | 0.292  | 0.3   | 0.973  | 0.331 | 1.339 | 0.402 | 0.844  | 0.399 | 0.743 | 2.413 |
| NIPAL3    | -0.121 | 0.297 | -0.407 | 0.684 | 0.886 | 0.263 | -0.433 | 0.665 | 0.495 | 1.586 |
| NIPAL2    | -0.22  | 0.296 | -0.746 | 0.456 | 0.802 | 0.237 | -0.835 | 0.404 | 0.449 | 1.432 |
| NIPA2     | -0.115 | 0.295 | -0.389 | 0.698 | 0.892 | 0.263 | -0.412 | 0.681 | 0.5   | 1.591 |
| NIP7      | 0.111  | 0.295 | 0.377  | 0.706 | 1.118 | 0.33  | 0.356  | 0.721 | 0.627 | 1.994 |
| NINL      | 0.699  | 0.306 | 2.286  | 0.022 | 2.013 | 0.616 | 1.645  | 0.1   | 1.105 | 3.666 |
| NINJ2     | -0.63  | 0.306 | -2.061 | 0.039 | 0.532 | 0.163 | -2.872 | 0.004 | 0.292 | 0.97  |
| NINJ1     | -0.141 | 0.296 | -0.475 | 0.635 | 0.869 | 0.257 | -0.51  | 0.61  | 0.486 | 1.553 |
| NIN       | 0.279  | 0.3   | 0.931  | 0.352 | 1.322 | 0.396 | 0.813  | 0.416 | 0.735 | 2.378 |
| NIF3L1    | 0.11   | 0.296 | 0.371  | 0.71  | 1.116 | 0.331 | 0.352  | 0.725 | 0.625 | 1.995 |
| NID2      | -0.544 | 0.3   | -1.811 | 0.07  | 0.581 | 0.174 | -2.406 | 0.016 | 0.322 | 1.046 |
| NID1      | -0.341 | 0.297 | -1.151 | 0.25  | 0.711 | 0.211 | -1.372 | 0.17  | 0.397 | 1.271 |
| NIBAN1    | -0.187 | 0.296 | -0.631 | 0.528 | 0.829 | 0.246 | -0.694 | 0.488 | 0.464 | 1.482 |
| NHP2      | 0.215  | 0.296 | 0.725  | 0.468 | 1.24  | 0.367 | 0.653  | 0.514 | 0.694 | 2.216 |
| NHLRC2    | -0.557 | 0.306 | -1.822 | 0.069 | 0.573 | 0.175 | -2.437 | 0.015 | 0.315 | 1.043 |
| NHLH2     | 0.029  | 0.295 | 0.098  | 0.922 | 1.029 | 0.304 | 0.096  | 0.923 | 0.577 | 1.835 |
| NHLH1     | 0.057  | 0.295 | 0.194  | 0.846 | 1.059 | 0.313 | 0.189  | 0.85  | 0.594 | 1.888 |
| NGRN      | 0.343  | 0.3   | 1.143  | 0.253 | 1.409 | 0.422 | 0.968  | 0.333 | 0.783 | 2.535 |

|          |        |       |        |       |       |       |        |       |       |       |
|----------|--------|-------|--------|-------|-------|-------|--------|-------|-------|-------|
| NGLY1    | -0.593 | 0.311 | -1.909 | 0.056 | 0.553 | 0.172 | -2.605 | 0.009 | 0.301 | 1.016 |
| NGFR     | 0.233  | 0.297 | 0.786  | 0.432 | 1.262 | 0.374 | 0.701  | 0.483 | 0.706 | 2.258 |
| NGF      | -0.524 | 0.303 | -1.733 | 0.083 | 0.592 | 0.179 | -2.278 | 0.023 | 0.327 | 1.071 |
| NGDN     | 0.646  | 0.31  | 2.087  | 0.037 | 1.908 | 0.591 | 1.537  | 0.124 | 1.04  | 3.502 |
| NGB      | -0.249 | 0.296 | -0.842 | 0.4   | 0.779 | 0.231 | -0.956 | 0.339 | 0.436 | 1.393 |
| NFYC     | -0.402 | 0.303 | -1.329 | 0.184 | 0.669 | 0.202 | -1.636 | 0.102 | 0.37  | 1.211 |
| NFYB     | -0.111 | 0.295 | -0.376 | 0.707 | 0.895 | 0.264 | -0.398 | 0.691 | 0.502 | 1.596 |
| NFYA     | 0.363  | 0.303 | 1.198  | 0.231 | 1.437 | 0.435 | 1.005  | 0.315 | 0.794 | 2.602 |
| NFX1     | -0.54  | 0.303 | -1.781 | 0.075 | 0.583 | 0.177 | -2.361 | 0.018 | 0.322 | 1.056 |
| NFU1     | -0.46  | 0.307 | -1.498 | 0.134 | 0.631 | 0.194 | -1.903 | 0.057 | 0.346 | 1.152 |
| NFS1     | 0.208  | 0.299 | 0.697  | 0.486 | 1.232 | 0.368 | 0.629  | 0.529 | 0.685 | 2.214 |
| NFRKB    | 0.422  | 0.3   | 1.407  | 0.159 | 1.524 | 0.457 | 1.148  | 0.251 | 0.847 | 2.743 |
| NFKBIL1  | 0.059  | 0.295 | 0.201  | 0.841 | 1.061 | 0.313 | 0.195  | 0.846 | 0.595 | 1.892 |
| NFKBIE   | 0.566  | 0.303 | 1.87   | 0.061 | 1.761 | 0.533 | 1.428  | 0.153 | 0.973 | 3.186 |
| NFKBIB   | 0.018  | 0.296 | 0.063  | 0.95  | 1.019 | 0.301 | 0.062  | 0.951 | 0.571 | 1.818 |
| NFKBIA   | 0.203  | 0.299 | 0.678  | 0.498 | 1.225 | 0.366 | 0.614  | 0.539 | 0.682 | 2.199 |
| NFKB2    | -0.469 | 0.303 | -1.548 | 0.122 | 0.625 | 0.19  | -1.976 | 0.048 | 0.345 | 1.133 |
| NFKB1    | -0.559 | 0.303 | -1.846 | 0.065 | 0.572 | 0.173 | -2.473 | 0.013 | 0.316 | 1.035 |
| NFIX     | 0.858  | 0.311 | 2.76   | 0.006 | 2.36  | 0.734 | 1.852  | 0.064 | 1.282 | 4.342 |
| NFIL3    | 0.126  | 0.296 | 0.425  | 0.671 | 1.134 | 0.336 | 0.399  | 0.69  | 0.634 | 2.027 |
| NFIC     | -0.179 | 0.299 | -0.6   | 0.549 | 0.836 | 0.25  | -0.657 | 0.511 | 0.466 | 1.501 |
| NFIB     | 0.168  | 0.299 | 0.562  | 0.574 | 1.183 | 0.353 | 0.518  | 0.605 | 0.659 | 2.125 |
| NFE2L3   | 0.042  | 0.295 | 0.143  | 0.886 | 1.043 | 0.308 | 0.14   | 0.889 | 0.585 | 1.861 |
| NFE2L2   | -0.165 | 0.295 | -0.558 | 0.577 | 0.848 | 0.251 | -0.606 | 0.544 | 0.475 | 1.513 |
| NFE2L1   | -0.095 | 0.298 | -0.319 | 0.749 | 0.909 | 0.271 | -0.335 | 0.738 | 0.507 | 1.632 |
| NFE2     | -0.187 | 0.296 | -0.631 | 0.528 | 0.829 | 0.246 | -0.694 | 0.488 | 0.464 | 1.482 |
| NFATC4   | -0.144 | 0.296 | -0.486 | 0.627 | 0.866 | 0.256 | -0.522 | 0.601 | 0.485 | 1.546 |
| NFATC3   | 0.033  | 0.295 | 0.112  | 0.911 | 1.034 | 0.305 | 0.11   | 0.912 | 0.58  | 1.843 |
| NFATC2IP | 0.336  | 0.3   | 1.122  | 0.262 | 1.399 | 0.419 | 0.953  | 0.341 | 0.778 | 2.518 |
| NFATC1   | -0.182 | 0.296 | -0.615 | 0.538 | 0.833 | 0.247 | -0.675 | 0.5   | 0.467 | 1.489 |
| NFAT5    | 0.066  | 0.296 | 0.223  | 0.823 | 1.068 | 0.317 | 0.216  | 0.829 | 0.598 | 1.91  |
| NFASC    | 0.279  | 0.298 | 0.937  | 0.349 | 1.321 | 0.393 | 0.817  | 0.414 | 0.737 | 2.368 |
| NF2      | -0.318 | 0.298 | -1.068 | 0.285 | 0.728 | 0.217 | -1.258 | 0.209 | 0.406 | 1.304 |
| NF1      | -0.251 | 0.297 | -0.845 | 0.398 | 0.778 | 0.231 | -0.96  | 0.337 | 0.434 | 1.393 |
| NEUROG3  | 0.651  | 0.306 | 2.124  | 0.034 | 1.917 | 0.587 | 1.561  | 0.119 | 1.051 | 3.495 |
| NEUROG2  | 0.46   | 0.3   | 1.534  | 0.125 | 1.584 | 0.475 | 1.23   | 0.219 | 0.88  | 2.85  |
| NEUROG1  | -0.199 | 0.296 | -0.673 | 0.501 | 0.819 | 0.243 | -0.745 | 0.456 | 0.459 | 1.464 |
| NEUROD6  | 0.756  | 0.306 | 2.471  | 0.013 | 2.129 | 0.651 | 1.734  | 0.083 | 1.169 | 3.878 |

|         |        |       |        |       |       |       |        |       |       |       |
|---------|--------|-------|--------|-------|-------|-------|--------|-------|-------|-------|
| NEUROD4 | 0.092  | 0.295 | 0.311  | 0.756 | 1.096 | 0.324 | 0.297  | 0.766 | 0.614 | 1.955 |
| NEUROD2 | -0.297 | 0.298 | -0.996 | 0.319 | 0.743 | 0.221 | -1.159 | 0.246 | 0.415 | 1.333 |
| NEUROD1 | 0.255  | 0.297 | 0.861  | 0.389 | 1.291 | 0.383 | 0.76   | 0.447 | 0.722 | 2.309 |
| NEURL1  | -0.042 | 0.296 | -0.142 | 0.887 | 0.959 | 0.283 | -0.145 | 0.885 | 0.537 | 1.711 |
| NEU3    | -0.184 | 0.296 | -0.622 | 0.534 | 0.832 | 0.246 | -0.683 | 0.495 | 0.466 | 1.486 |
| NEU2    | 0.266  | 0.296 | 0.898  | 0.369 | 1.305 | 0.386 | 0.788  | 0.431 | 0.73  | 2.331 |
| NEU1    | -0.412 | 0.302 | -1.362 | 0.173 | 0.662 | 0.2   | -1.686 | 0.092 | 0.366 | 1.198 |
| NETO2   | 0.267  | 0.298 | 0.894  | 0.371 | 1.305 | 0.389 | 0.785  | 0.433 | 0.728 | 2.341 |
| NET1    | 0.335  | 0.298 | 1.126  | 0.26  | 1.398 | 0.416 | 0.957  | 0.339 | 0.78  | 2.506 |
| NES     | 0.23   | 0.298 | 0.771  | 0.441 | 1.258 | 0.374 | 0.689  | 0.491 | 0.702 | 2.254 |
| NEO1    | -0.363 | 0.303 | -1.198 | 0.231 | 0.696 | 0.211 | -1.444 | 0.149 | 0.385 | 1.259 |
| NENF    | 0.403  | 0.3   | 1.346  | 0.178 | 1.497 | 0.448 | 1.108  | 0.268 | 0.832 | 2.692 |
| NEMP1   | 0.439  | 0.3   | 1.465  | 0.143 | 1.551 | 0.465 | 1.186  | 0.236 | 0.862 | 2.79  |
| NEMF    | -0.017 | 0.296 | -0.057 | 0.954 | 0.983 | 0.291 | -0.058 | 0.954 | 0.551 | 1.755 |
| NELL2   | 0.224  | 0.296 | 0.755  | 0.45  | 1.251 | 0.37  | 0.677  | 0.499 | 0.7   | 2.235 |
| NELL1   | 0.352  | 0.298 | 1.183  | 0.237 | 1.422 | 0.423 | 0.997  | 0.319 | 0.794 | 2.549 |
| NELFCD  | 0.187  | 0.299 | 0.624  | 0.532 | 1.206 | 0.361 | 0.569  | 0.569 | 0.67  | 2.168 |
| NELFB   | 0.062  | 0.295 | 0.21   | 0.833 | 1.064 | 0.314 | 0.204  | 0.838 | 0.597 | 1.897 |
| NEK9    | 0.187  | 0.296 | 0.632  | 0.528 | 1.206 | 0.357 | 0.576  | 0.565 | 0.675 | 2.154 |
| NEK7    | -0.567 | 0.307 | -1.85  | 0.064 | 0.567 | 0.174 | -2.49  | 0.013 | 0.311 | 1.034 |
| NEK4    | -0.095 | 0.296 | -0.323 | 0.747 | 0.909 | 0.269 | -0.339 | 0.735 | 0.509 | 1.623 |
| NEK3    | 0.018  | 0.295 | 0.062  | 0.951 | 1.018 | 0.301 | 0.061  | 0.951 | 0.571 | 1.816 |
| NEK2    | 0.777  | 0.315 | 2.467  | 0.014 | 2.175 | 0.685 | 1.715  | 0.086 | 1.173 | 4.032 |
| NEK11   | -0.087 | 0.295 | -0.294 | 0.769 | 0.917 | 0.271 | -0.307 | 0.759 | 0.514 | 1.635 |
| NEK1    | 0.291  | 0.298 | 0.978  | 0.328 | 1.338 | 0.399 | 0.849  | 0.396 | 0.746 | 2.399 |
| NEIL3   | 0.282  | 0.298 | 0.945  | 0.345 | 1.326 | 0.395 | 0.823  | 0.41  | 0.739 | 2.379 |
| NEFM    | 0.046  | 0.295 | 0.154  | 0.877 | 1.047 | 0.309 | 0.151  | 0.88  | 0.587 | 1.867 |
| NEFL    | -0.703 | 0.306 | -2.298 | 0.022 | 0.495 | 0.152 | -3.334 | 0.001 | 0.272 | 0.902 |
| NEFH    | -0.252 | 0.296 | -0.851 | 0.395 | 0.777 | 0.23  | -0.967 | 0.333 | 0.435 | 1.389 |
| NEDD9   | 0.144  | 0.296 | 0.486  | 0.627 | 1.155 | 0.342 | 0.453  | 0.651 | 0.646 | 2.064 |
| NEDD8   | 0.413  | 0.299 | 1.384  | 0.167 | 1.512 | 0.452 | 1.133  | 0.257 | 0.842 | 2.715 |
| NEDD4L  | 0.142  | 0.295 | 0.48   | 0.631 | 1.152 | 0.34  | 0.448  | 0.654 | 0.646 | 2.055 |
| NEDD4   | -0.537 | 0.303 | -1.776 | 0.076 | 0.584 | 0.177 | -2.352 | 0.019 | 0.323 | 1.057 |
| NECTIN3 | -0.216 | 0.296 | -0.73  | 0.465 | 0.806 | 0.239 | -0.815 | 0.415 | 0.451 | 1.439 |
| NECTIN2 | 0.105  | 0.296 | 0.354  | 0.723 | 1.11  | 0.328 | 0.336  | 0.737 | 0.622 | 1.982 |
| NECTIN1 | -0.068 | 0.295 | -0.23  | 0.818 | 0.934 | 0.276 | -0.238 | 0.812 | 0.524 | 1.667 |
| NECAP2  | -0.617 | 0.306 | -2.018 | 0.044 | 0.54  | 0.165 | -2.792 | 0.005 | 0.296 | 0.982 |
| NECAP1  | -0.099 | 0.296 | -0.335 | 0.738 | 0.906 | 0.268 | -0.352 | 0.725 | 0.507 | 1.618 |

|            |        |       |        |       |       |       |        |       |       |       |
|------------|--------|-------|--------|-------|-------|-------|--------|-------|-------|-------|
| NECAB3     | -0.005 | 0.295 | -0.016 | 0.988 | 0.995 | 0.294 | -0.016 | 0.988 | 0.558 | 1.775 |
| NECAB2     | 0.094  | 0.295 | 0.319  | 0.75  | 1.099 | 0.325 | 0.304  | 0.761 | 0.616 | 1.96  |
| NEBL       | 0.415  | 0.298 | 1.393  | 0.164 | 1.515 | 0.451 | 1.14   | 0.254 | 0.845 | 2.716 |
| NEB        | 0.071  | 0.295 | 0.24   | 0.81  | 1.074 | 0.317 | 0.232  | 0.817 | 0.602 | 1.915 |
| NDUFV2     | 0.017  | 0.298 | 0.057  | 0.954 | 1.017 | 0.303 | 0.057  | 0.955 | 0.567 | 1.825 |
| NDUFV1     | 0.317  | 0.298 | 1.066  | 0.287 | 1.374 | 0.409 | 0.913  | 0.361 | 0.766 | 2.463 |
| NDUFS7     | 0.09   | 0.295 | 0.306  | 0.759 | 1.095 | 0.323 | 0.293  | 0.77  | 0.614 | 1.952 |
| NDUFS6     | 1.018  | 0.321 | 3.174  | 0.002 | 2.768 | 0.888 | 1.991  | 0.046 | 1.476 | 5.192 |
| NDUFS4     | 0.165  | 0.299 | 0.553  | 0.581 | 1.18  | 0.353 | 0.509  | 0.611 | 0.656 | 2.12  |
| NDUFS3     | 0.355  | 0.297 | 1.198  | 0.231 | 1.427 | 0.423 | 1.008  | 0.313 | 0.798 | 2.553 |
| NDUFS2     | 0.052  | 0.297 | 0.177  | 0.86  | 1.054 | 0.313 | 0.172  | 0.863 | 0.589 | 1.885 |
| NDUFS1     | 0.503  | 0.3   | 1.678  | 0.093 | 1.654 | 0.497 | 1.318  | 0.187 | 0.919 | 2.979 |
| NDUFC1     | 0.523  | 0.301 | 1.738  | 0.082 | 1.688 | 0.508 | 1.353  | 0.176 | 0.935 | 3.044 |
| NDUFB8     | -0.093 | 0.299 | -0.311 | 0.756 | 0.911 | 0.272 | -0.325 | 0.745 | 0.508 | 1.637 |
| NDUFB7     | 0.757  | 0.308 | 2.458  | 0.014 | 2.132 | 0.656 | 1.724  | 0.085 | 1.166 | 3.898 |
| NDUFB6     | 0.651  | 0.303 | 2.149  | 0.032 | 1.918 | 0.581 | 1.579  | 0.114 | 1.059 | 3.473 |
| NDUFB5     | 0.886  | 0.315 | 2.809  | 0.005 | 2.425 | 0.765 | 1.864  | 0.062 | 1.307 | 4.499 |
| NDUFB4     | 0.488  | 0.3   | 1.629  | 0.103 | 1.629 | 0.488 | 1.289  | 0.197 | 0.906 | 2.932 |
| NDUFB3     | 0.003  | 0.296 | 0.011  | 0.991 | 1.003 | 0.297 | 0.011  | 0.991 | 0.562 | 1.791 |
| NDUFB2-AS1 | 0.499  | 0.302 | 1.651  | 0.099 | 1.647 | 0.498 | 1.3    | 0.194 | 0.911 | 2.98  |
| NDUFB2     | 0.491  | 0.299 | 1.643  | 0.1   | 1.634 | 0.488 | 1.299  | 0.194 | 0.91  | 2.935 |
| NDUFB11    | 0.004  | 0.295 | 0.013  | 0.99  | 1.004 | 0.296 | 0.013  | 0.99  | 0.563 | 1.79  |
| NDUFB1     | 0.26   | 0.296 | 0.879  | 0.379 | 1.298 | 0.384 | 0.774  | 0.439 | 0.726 | 2.319 |
| NDUFAF7    | 0.095  | 0.295 | 0.32   | 0.749 | 1.099 | 0.325 | 0.306  | 0.76  | 0.616 | 1.961 |
| NDUFAF5    | 0.185  | 0.296 | 0.626  | 0.531 | 1.204 | 0.356 | 0.571  | 0.568 | 0.674 | 2.15  |
| NDUFAF4    | 0.312  | 0.297 | 1.047  | 0.295 | 1.366 | 0.406 | 0.9    | 0.368 | 0.762 | 2.446 |
| NDUFAF3    | -0.009 | 0.297 | -0.031 | 0.975 | 0.991 | 0.294 | -0.031 | 0.975 | 0.553 | 1.774 |
| NDUFAF1    | -0.201 | 0.305 | -0.661 | 0.509 | 0.818 | 0.249 | -0.732 | 0.464 | 0.45  | 1.485 |
| NDUFAB1    | 0.595  | 0.306 | 1.946  | 0.052 | 1.812 | 0.554 | 1.467  | 0.142 | 0.996 | 3.299 |
| NDUFA9     | 0.428  | 0.298 | 1.434  | 0.151 | 1.534 | 0.457 | 1.167  | 0.243 | 0.855 | 2.751 |
| NDUFA8     | 0.775  | 0.31  | 2.498  | 0.012 | 2.17  | 0.673 | 1.739  | 0.082 | 1.182 | 3.984 |
| NDUFA7     | -0.057 | 0.297 | -0.192 | 0.848 | 0.945 | 0.281 | -0.197 | 0.844 | 0.528 | 1.691 |
| NDUFA6     | 0.36   | 0.298 | 1.209  | 0.227 | 1.433 | 0.427 | 1.015  | 0.31  | 0.8   | 2.57  |
| NDUFA5     | 0.007  | 0.296 | 0.024  | 0.981 | 1.007 | 0.298 | 0.024  | 0.981 | 0.564 | 1.8   |
| NDUFA4L2   | -0.073 | 0.296 | -0.248 | 0.804 | 0.929 | 0.275 | -0.257 | 0.797 | 0.521 | 1.659 |
| NDUFA4     | 1.227  | 0.336 | 3.646  | 0     | 3.41  | 1.147 | 2.101  | 0.036 | 1.764 | 6.593 |
| NDUFA3     | 0.149  | 0.296 | 0.503  | 0.615 | 1.16  | 0.343 | 0.468  | 0.64  | 0.65  | 2.072 |
| NDUFA2     | 0.266  | 0.296 | 0.896  | 0.37  | 1.304 | 0.386 | 0.787  | 0.431 | 0.73  | 2.331 |

|         |        |       |        |       |       |       |        |       |       |       |
|---------|--------|-------|--------|-------|-------|-------|--------|-------|-------|-------|
| NDUFA13 | 0.717  | 0.307 | 2.332  | 0.02  | 2.048 | 0.63  | 1.665  | 0.096 | 1.121 | 3.743 |
| NDUFA10 | -0.45  | 0.3   | -1.5   | 0.134 | 0.638 | 0.191 | -1.894 | 0.058 | 0.355 | 1.148 |
| NDUFA1  | 0.179  | 0.297 | 0.602  | 0.547 | 1.195 | 0.354 | 0.551  | 0.581 | 0.669 | 2.138 |
| NDST4   | 0.152  | 0.296 | 0.515  | 0.607 | 1.165 | 0.345 | 0.477  | 0.633 | 0.652 | 2.081 |
| NDST3   | -0.095 | 0.295 | -0.322 | 0.748 | 0.909 | 0.269 | -0.337 | 0.736 | 0.51  | 1.622 |
| NDST2   | 0.255  | 0.297 | 0.859  | 0.39  | 1.29  | 0.383 | 0.758  | 0.448 | 0.721 | 2.308 |
| NDST1   | 0.143  | 0.298 | 0.481  | 0.63  | 1.154 | 0.344 | 0.449  | 0.654 | 0.644 | 2.069 |
| NDRG4   | -0.137 | 0.296 | -0.461 | 0.645 | 0.872 | 0.258 | -0.494 | 0.621 | 0.488 | 1.559 |
| NDRG3   | 0.054  | 0.295 | 0.183  | 0.854 | 1.056 | 0.312 | 0.179  | 0.858 | 0.592 | 1.883 |
| NDRG2   | 0.105  | 0.296 | 0.353  | 0.724 | 1.11  | 0.329 | 0.336  | 0.737 | 0.621 | 1.986 |
| NDRG1   | 0.047  | 0.296 | 0.158  | 0.875 | 1.048 | 0.31  | 0.154  | 0.878 | 0.587 | 1.871 |
| NDP     | -0.792 | 0.315 | -2.514 | 0.012 | 0.453 | 0.143 | -3.833 | 0     | 0.244 | 0.84  |
| NDOR1   | -0.477 | 0.302 | -1.579 | 0.114 | 0.621 | 0.188 | -2.024 | 0.043 | 0.343 | 1.122 |
| NDNF    | -0.612 | 0.308 | -1.991 | 0.046 | 0.542 | 0.167 | -2.747 | 0.006 | 0.297 | 0.99  |
| NDN     | -0.529 | 0.302 | -1.75  | 0.08  | 0.589 | 0.178 | -2.306 | 0.021 | 0.326 | 1.066 |
| NDFIP1  | -0.505 | 0.302 | -1.671 | 0.095 | 0.603 | 0.182 | -2.174 | 0.03  | 0.334 | 1.091 |
| NDEL1   | 0.641  | 0.303 | 2.114  | 0.035 | 1.899 | 0.576 | 1.56   | 0.119 | 1.048 | 3.442 |
| NDE1    | 0.321  | 0.298 | 1.077  | 0.282 | 1.378 | 0.411 | 0.921  | 0.357 | 0.768 | 2.472 |
| NDC80   | 0.878  | 0.315 | 2.791  | 0.005 | 2.407 | 0.757 | 1.858  | 0.063 | 1.299 | 4.46  |
| NDC1    | 0.366  | 0.298 | 1.229  | 0.219 | 1.442 | 0.429 | 1.03   | 0.303 | 0.805 | 2.584 |
| NCSTN   | -0.662 | 0.317 | -2.091 | 0.036 | 0.516 | 0.163 | -2.965 | 0.003 | 0.277 | 0.959 |
| NCS1    | 0.248  | 0.298 | 0.833  | 0.405 | 1.281 | 0.381 | 0.738  | 0.461 | 0.715 | 2.296 |
| NCR3    | -0.383 | 0.3   | -1.279 | 0.201 | 0.682 | 0.204 | -1.559 | 0.119 | 0.379 | 1.226 |
| NCR2    | 0.176  | 0.296 | 0.594  | 0.552 | 1.192 | 0.353 | 0.545  | 0.586 | 0.667 | 2.13  |
| NCR1    | -0.047 | 0.295 | -0.158 | 0.874 | 0.954 | 0.282 | -0.162 | 0.871 | 0.535 | 1.703 |
| NCOR2   | -0.465 | 0.3   | -1.55  | 0.121 | 0.628 | 0.188 | -1.973 | 0.049 | 0.349 | 1.131 |
| NCOR1   | -0.058 | 0.296 | -0.197 | 0.844 | 0.944 | 0.279 | -0.202 | 0.84  | 0.529 | 1.684 |
| NCOA6   | -0.136 | 0.296 | -0.459 | 0.646 | 0.873 | 0.258 | -0.492 | 0.623 | 0.489 | 1.558 |
| NCOA4   | -0.425 | 0.3   | -1.418 | 0.156 | 0.654 | 0.196 | -1.768 | 0.077 | 0.363 | 1.176 |
| NCOA3   | -0.004 | 0.296 | -0.015 | 0.988 | 0.996 | 0.295 | -0.015 | 0.988 | 0.557 | 1.779 |
| NCOA2   | 0.071  | 0.295 | 0.239  | 0.811 | 1.073 | 0.317 | 0.23   | 0.818 | 0.601 | 1.914 |
| NCOA1   | -0.49  | 0.301 | -1.629 | 0.103 | 0.613 | 0.184 | -2.102 | 0.036 | 0.34  | 1.105 |
| NCLN    | 0.13   | 0.297 | 0.44   | 0.66  | 1.139 | 0.338 | 0.412  | 0.68  | 0.637 | 2.038 |
| NCL     | 0.156  | 0.3   | 0.518  | 0.604 | 1.168 | 0.351 | 0.48   | 0.631 | 0.649 | 2.104 |
| NCKIPSD | -0.135 | 0.295 | -0.456 | 0.648 | 0.874 | 0.258 | -0.488 | 0.626 | 0.49  | 1.559 |
| NCKAP1L | -0.179 | 0.296 | -0.606 | 0.545 | 0.836 | 0.248 | -0.663 | 0.507 | 0.468 | 1.494 |
| NCKAP1  | 0.286  | 0.297 | 0.965  | 0.335 | 1.332 | 0.395 | 0.839  | 0.401 | 0.744 | 2.383 |
| NCK2    | 0.435  | 0.307 | 1.415  | 0.157 | 1.545 | 0.475 | 1.148  | 0.251 | 0.846 | 2.822 |



|        |        |       |        |       |       |       |        |       |       |       |
|--------|--------|-------|--------|-------|-------|-------|--------|-------|-------|-------|
| NCK1   | -0.003 | 0.295 | -0.011 | 0.992 | 0.997 | 0.294 | -0.011 | 0.992 | 0.559 | 1.778 |
| NCF4   | 0.049  | 0.295 | 0.167  | 0.867 | 1.051 | 0.31  | 0.163  | 0.87  | 0.589 | 1.873 |
| NCF2   | 0.361  | 0.299 | 1.21   | 0.226 | 1.435 | 0.429 | 1.015  | 0.31  | 0.799 | 2.578 |
| NCDN   | -0.133 | 0.298 | -0.445 | 0.656 | 0.876 | 0.261 | -0.476 | 0.634 | 0.488 | 1.571 |
| NCBP3  | 0.409  | 0.304 | 1.348  | 0.178 | 1.506 | 0.457 | 1.106  | 0.269 | 0.831 | 2.73  |
| NCBP2  | 0.625  | 0.31  | 2.018  | 0.044 | 1.869 | 0.579 | 1.5    | 0.134 | 1.018 | 3.43  |
| NCBP1  | 0.479  | 0.3   | 1.595  | 0.111 | 1.614 | 0.485 | 1.267  | 0.205 | 0.896 | 2.907 |
| NCAPH2 | 0.472  | 0.302 | 1.561  | 0.118 | 1.603 | 0.485 | 1.244  | 0.213 | 0.886 | 2.9   |
| NCAPH  | 0.753  | 0.31  | 2.432  | 0.015 | 2.124 | 0.658 | 1.708  | 0.088 | 1.157 | 3.897 |
| NCAPG2 | 0.432  | 0.298 | 1.45   | 0.147 | 1.54  | 0.459 | 1.177  | 0.239 | 0.859 | 2.76  |
| NCAPG  | 0.697  | 0.306 | 2.28   | 0.023 | 2.008 | 0.614 | 1.642  | 0.101 | 1.103 | 3.655 |
| NCAPD3 | 0.443  | 0.3   | 1.479  | 0.139 | 1.558 | 0.467 | 1.195  | 0.232 | 0.866 | 2.802 |
| NCAPD2 | 0.397  | 0.298 | 1.335  | 0.182 | 1.488 | 0.443 | 1.102  | 0.27  | 0.83  | 2.667 |
| NCAN   | 0.166  | 0.301 | 0.553  | 0.58  | 1.181 | 0.355 | 0.509  | 0.61  | 0.655 | 2.129 |
| NCAM2  | -0.002 | 0.296 | -0.007 | 0.995 | 0.998 | 0.295 | -0.007 | 0.995 | 0.559 | 1.781 |
| NCAM1  | 0.077  | 0.298 | 0.259  | 0.796 | 1.08  | 0.322 | 0.249  | 0.803 | 0.603 | 1.937 |
| NCALD  | 0.058  | 0.296 | 0.195  | 0.845 | 1.059 | 0.313 | 0.19   | 0.849 | 0.594 | 1.891 |
| NBR2   | 0.522  | 0.302 | 1.73   | 0.084 | 1.685 | 0.508 | 1.348  | 0.178 | 0.933 | 3.044 |
| NBR1   | -0.378 | 0.3   | -1.262 | 0.207 | 0.685 | 0.205 | -1.534 | 0.125 | 0.381 | 1.233 |
| NBPF1  | -0.869 | 0.315 | -2.759 | 0.006 | 0.419 | 0.132 | -4.397 | 0     | 0.226 | 0.777 |
| NBN    | -0.525 | 0.303 | -1.735 | 0.083 | 0.591 | 0.179 | -2.282 | 0.022 | 0.327 | 1.071 |
| NBL1   | -0.459 | 0.303 | -1.515 | 0.13  | 0.632 | 0.191 | -1.923 | 0.055 | 0.349 | 1.144 |
| NBEAL2 | -0.282 | 0.296 | -0.951 | 0.341 | 0.754 | 0.223 | -1.099 | 0.272 | 0.422 | 1.348 |
| NBEA   | -0.354 | 0.3   | -1.181 | 0.238 | 0.702 | 0.21  | -1.417 | 0.157 | 0.39  | 1.263 |
| NBAS   | -0.037 | 0.295 | -0.125 | 0.901 | 0.964 | 0.284 | -0.127 | 0.899 | 0.541 | 1.719 |
| NAXD   | 0.243  | 0.296 | 0.82   | 0.412 | 1.275 | 0.378 | 0.728  | 0.467 | 0.713 | 2.28  |
| NAV3   | -0.846 | 0.321 | -2.637 | 0.008 | 0.429 | 0.138 | -4.145 | 0     | 0.229 | 0.805 |
| NAV2   | 0.069  | 0.295 | 0.234  | 0.815 | 1.071 | 0.316 | 0.226  | 0.821 | 0.601 | 1.911 |
| NAT9   | 0.286  | 0.298 | 0.96   | 0.337 | 1.332 | 0.397 | 0.835  | 0.404 | 0.742 | 2.389 |
| NAT8B  | -0.326 | 0.3   | -1.087 | 0.277 | 0.722 | 0.216 | -1.285 | 0.199 | 0.401 | 1.299 |
| NAT2   | -0.649 | 0.31  | -2.095 | 0.036 | 0.523 | 0.162 | -2.949 | 0.003 | 0.285 | 0.959 |
| NAT10  | 0.171  | 0.296 | 0.576  | 0.564 | 1.186 | 0.351 | 0.53   | 0.596 | 0.664 | 2.12  |
| NAT1   | -0.478 | 0.302 | -1.58  | 0.114 | 0.62  | 0.188 | -2.025 | 0.043 | 0.343 | 1.122 |
| NASP   | 0.315  | 0.297 | 1.061  | 0.289 | 1.37  | 0.406 | 0.91   | 0.363 | 0.766 | 2.45  |
| NARS2  | 0.058  | 0.296 | 0.196  | 0.845 | 1.06  | 0.314 | 0.19   | 0.849 | 0.593 | 1.892 |
| NARS1  | 0.333  | 0.298 | 1.116  | 0.264 | 1.395 | 0.416 | 0.95   | 0.342 | 0.778 | 2.501 |
| NARF   | 0.6    | 0.302 | 1.984  | 0.047 | 1.822 | 0.551 | 1.492  | 0.136 | 1.007 | 3.294 |
| NAPG   | 0.248  | 0.296 | 0.838  | 0.402 | 1.282 | 0.38  | 0.742  | 0.458 | 0.717 | 2.29  |

|          |        |       |        |       |       |       |        |       |       |       |
|----------|--------|-------|--------|-------|-------|-------|--------|-------|-------|-------|
| NAPA     | -0.634 | 0.31  | -2.045 | 0.041 | 0.531 | 0.164 | -2.855 | 0.004 | 0.289 | 0.974 |
| NAP1L4   | 0.053  | 0.295 | 0.18   | 0.857 | 1.055 | 0.311 | 0.176  | 0.861 | 0.592 | 1.88  |
| NAP1L3   | -0.413 | 0.3   | -1.379 | 0.168 | 0.661 | 0.198 | -1.708 | 0.088 | 0.368 | 1.19  |
| NAP1L2   | 0.043  | 0.295 | 0.144  | 0.885 | 1.043 | 0.308 | 0.141  | 0.888 | 0.585 | 1.861 |
| NAP1L1   | -0.666 | 0.307 | -2.165 | 0.03  | 0.514 | 0.158 | -3.075 | 0.002 | 0.281 | 0.939 |
| NANS     | 0.407  | 0.3   | 1.358  | 0.175 | 1.503 | 0.451 | 1.115  | 0.265 | 0.835 | 2.705 |
| NANOG    | -0.06  | 0.296 | -0.203 | 0.839 | 0.942 | 0.278 | -0.21  | 0.834 | 0.528 | 1.681 |
| NAMPT    | -0.181 | 0.296 | -0.612 | 0.541 | 0.834 | 0.247 | -0.671 | 0.502 | 0.467 | 1.491 |
| NAIP     | -0.424 | 0.302 | -1.401 | 0.161 | 0.655 | 0.198 | -1.744 | 0.081 | 0.362 | 1.184 |
| NAGPA    | -0.095 | 0.295 | -0.321 | 0.748 | 0.909 | 0.268 | -0.337 | 0.736 | 0.51  | 1.622 |
| NAGLU    | 0.013  | 0.295 | 0.042  | 0.966 | 1.013 | 0.299 | 0.042  | 0.966 | 0.568 | 1.805 |
| NAGK     | 0.147  | 0.295 | 0.498  | 0.619 | 1.158 | 0.342 | 0.463  | 0.644 | 0.649 | 2.067 |
| NAGA     | -0.454 | 0.303 | -1.502 | 0.133 | 0.635 | 0.192 | -1.901 | 0.057 | 0.351 | 1.149 |
| NAE1     | 0.263  | 0.296 | 0.887  | 0.375 | 1.301 | 0.385 | 0.78   | 0.435 | 0.728 | 2.324 |
| NADSYN1  | 0.016  | 0.295 | 0.055  | 0.956 | 1.016 | 0.3   | 0.055  | 0.956 | 0.57  | 1.814 |
| NADK     | -0.686 | 0.31  | -2.212 | 0.027 | 0.504 | 0.156 | -3.178 | 0.001 | 0.274 | 0.925 |
| NACC2    | -0.076 | 0.295 | -0.258 | 0.796 | 0.927 | 0.273 | -0.268 | 0.788 | 0.52  | 1.652 |
| NACAD    | 0.095  | 0.295 | 0.323  | 0.747 | 1.1   | 0.325 | 0.308  | 0.758 | 0.617 | 1.962 |
| NACA4P   | 0.321  | 0.305 | 1.051  | 0.293 | 1.378 | 0.42  | 0.9    | 0.368 | 0.758 | 2.505 |
| NACA2    | -0.12  | 0.296 | -0.407 | 0.684 | 0.887 | 0.262 | -0.432 | 0.666 | 0.497 | 1.582 |
| NACA     | -0.466 | 0.306 | -1.522 | 0.128 | 0.627 | 0.192 | -1.939 | 0.052 | 0.344 | 1.144 |
| NABP2    | 0.154  | 0.296 | 0.518  | 0.604 | 1.166 | 0.346 | 0.48   | 0.631 | 0.652 | 2.084 |
| NABP1    | -0.571 | 0.303 | -1.888 | 0.059 | 0.565 | 0.171 | -2.547 | 0.011 | 0.312 | 1.022 |
| NAB2     | 0.126  | 0.295 | 0.425  | 0.671 | 1.134 | 0.335 | 0.4    | 0.69  | 0.636 | 2.023 |
| NAB1     | 0.132  | 0.296 | 0.447  | 0.655 | 1.142 | 0.338 | 0.419  | 0.675 | 0.639 | 2.04  |
| NAALADL1 | -0.692 | 0.306 | -2.259 | 0.024 | 0.5   | 0.153 | -3.257 | 0.001 | 0.275 | 0.913 |
| NAALAD2  | -0.183 | 0.295 | -0.619 | 0.536 | 0.833 | 0.246 | -0.68  | 0.497 | 0.467 | 1.486 |
| NAAA     | -0.064 | 0.296 | -0.217 | 0.828 | 0.938 | 0.277 | -0.225 | 0.822 | 0.525 | 1.674 |
| NAA80    | -0.204 | 0.296 | -0.689 | 0.491 | 0.815 | 0.241 | -0.765 | 0.445 | 0.456 | 1.457 |
| NAA60    | -0.063 | 0.295 | -0.212 | 0.832 | 0.939 | 0.277 | -0.219 | 0.827 | 0.527 | 1.675 |
| NAA50    | 0.245  | 0.3   | 0.818  | 0.413 | 1.278 | 0.383 | 0.725  | 0.468 | 0.71  | 2.298 |
| NAA40    | 0.366  | 0.303 | 1.209  | 0.227 | 1.442 | 0.437 | 1.012  | 0.311 | 0.797 | 2.611 |
| NAA35    | 0.086  | 0.297 | 0.29   | 0.772 | 1.09  | 0.324 | 0.278  | 0.781 | 0.609 | 1.952 |
| NAA16    | -0.271 | 0.296 | -0.914 | 0.36  | 0.763 | 0.226 | -1.05  | 0.294 | 0.427 | 1.363 |
| NAA15    | 0.982  | 0.321 | 3.064  | 0.002 | 2.671 | 0.856 | 1.951  | 0.051 | 1.425 | 5.007 |
| NAA11    | 0.443  | 0.303 | 1.463  | 0.143 | 1.557 | 0.471 | 1.182  | 0.237 | 0.86  | 2.818 |
| NAA10    | 0.326  | 0.296 | 1.101  | 0.271 | 1.386 | 0.411 | 0.94   | 0.347 | 0.775 | 2.478 |
| N6AMT1   | -0.369 | 0.303 | -1.217 | 0.224 | 0.692 | 0.21  | -1.471 | 0.141 | 0.382 | 1.253 |

|             |        |       |        |       |       |       |        |       |       |       |
|-------------|--------|-------|--------|-------|-------|-------|--------|-------|-------|-------|
| N4BP3       | 0.58   | 0.302 | 1.919  | 0.055 | 1.787 | 0.54  | 1.456  | 0.145 | 0.988 | 3.232 |
| N4BP2L2-IT2 | 0.091  | 0.295 | 0.307  | 0.759 | 1.095 | 0.323 | 0.294  | 0.769 | 0.614 | 1.953 |
| N4BP2L2     | -0.089 | 0.295 | -0.3   | 0.764 | 0.915 | 0.27  | -0.314 | 0.753 | 0.513 | 1.632 |
| N4BP2L1     | 0.222  | 0.298 | 0.746  | 0.456 | 1.248 | 0.371 | 0.669  | 0.504 | 0.697 | 2.237 |
| N4BP1       | -0.233 | 0.296 | -0.788 | 0.431 | 0.792 | 0.235 | -0.888 | 0.375 | 0.443 | 1.415 |
| MZT2B       | 0.157  | 0.297 | 0.528  | 0.597 | 1.17  | 0.348 | 0.489  | 0.625 | 0.654 | 2.094 |
| MZF1        | -0.117 | 0.297 | -0.395 | 0.693 | 0.889 | 0.264 | -0.419 | 0.675 | 0.497 | 1.59  |
| MZB1        | -0.336 | 0.298 | -1.127 | 0.26  | 0.715 | 0.213 | -1.339 | 0.181 | 0.398 | 1.282 |
| MYT1L       | 0.278  | 0.298 | 0.936  | 0.349 | 1.321 | 0.393 | 0.817  | 0.414 | 0.737 | 2.367 |
| MYT1        | 0.305  | 0.298 | 1.026  | 0.305 | 1.357 | 0.404 | 0.884  | 0.377 | 0.757 | 2.432 |
| MYRIP       | -0.225 | 0.298 | -0.755 | 0.45  | 0.799 | 0.238 | -0.847 | 0.397 | 0.446 | 1.431 |
| MYRF        | 0.518  | 0.302 | 1.713  | 0.087 | 1.678 | 0.507 | 1.337  | 0.181 | 0.928 | 3.035 |
| MYOZ3       | -0.478 | 0.3   | -1.591 | 0.112 | 0.62  | 0.186 | -2.04  | 0.041 | 0.344 | 1.117 |
| MYOZ2       | 0.204  | 0.296 | 0.688  | 0.492 | 1.226 | 0.363 | 0.622  | 0.534 | 0.686 | 2.191 |
| MYOZ1       | 0.287  | 0.298 | 0.963  | 0.336 | 1.332 | 0.397 | 0.837  | 0.403 | 0.743 | 2.388 |
| MYOT        | 0.45   | 0.298 | 1.51   | 0.131 | 1.569 | 0.468 | 1.216  | 0.224 | 0.874 | 2.813 |
| MYOM2       | -0.245 | 0.298 | -0.823 | 0.411 | 0.783 | 0.233 | -0.933 | 0.351 | 0.437 | 1.403 |
| MYOM1       | -0.52  | 0.303 | -1.719 | 0.086 | 0.594 | 0.18  | -2.255 | 0.024 | 0.328 | 1.076 |
| MYOG        | -0.014 | 0.295 | -0.049 | 0.961 | 0.986 | 0.291 | -0.049 | 0.961 | 0.553 | 1.758 |
| MYOF        | -0.754 | 0.31  | -2.431 | 0.015 | 0.471 | 0.146 | -3.628 | 0     | 0.256 | 0.864 |
| MYOD1       | 0.321  | 0.298 | 1.076  | 0.282 | 1.378 | 0.411 | 0.92   | 0.357 | 0.768 | 2.471 |
| MYOC        | -0.056 | 0.295 | -0.189 | 0.85  | 0.946 | 0.279 | -0.194 | 0.846 | 0.53  | 1.687 |
| MYO9B       | -0.163 | 0.296 | -0.553 | 0.58  | 0.849 | 0.251 | -0.601 | 0.548 | 0.476 | 1.515 |
| MYO9A       | 0.318  | 0.298 | 1.066  | 0.286 | 1.374 | 0.41  | 0.913  | 0.361 | 0.766 | 2.465 |
| MYO7B       | -0.047 | 0.296 | -0.16  | 0.873 | 0.954 | 0.282 | -0.163 | 0.87  | 0.534 | 1.704 |
| MYO7A       | 0.429  | 0.3   | 1.429  | 0.153 | 1.536 | 0.461 | 1.162  | 0.245 | 0.853 | 2.767 |
| MYO6        | -0.348 | 0.3   | -1.159 | 0.246 | 0.706 | 0.212 | -1.386 | 0.166 | 0.392 | 1.272 |
| MYO5C       | -0.47  | 0.302 | -1.555 | 0.12  | 0.625 | 0.189 | -1.985 | 0.047 | 0.346 | 1.13  |
| MYO5A       | -0.179 | 0.296 | -0.605 | 0.545 | 0.836 | 0.248 | -0.663 | 0.508 | 0.468 | 1.494 |
| MYO3A       | 0.099  | 0.295 | 0.336  | 0.737 | 1.104 | 0.326 | 0.32   | 0.749 | 0.619 | 1.97  |
| MYO1F       | -0.371 | 0.298 | -1.246 | 0.213 | 0.69  | 0.206 | -1.509 | 0.131 | 0.385 | 1.237 |
| MYO1E       | -0.141 | 0.295 | -0.478 | 0.633 | 0.868 | 0.256 | -0.513 | 0.608 | 0.487 | 1.549 |
| MYO1D       | -0.299 | 0.298 | -1.003 | 0.316 | 0.742 | 0.221 | -1.169 | 0.242 | 0.414 | 1.33  |
| MYO1C       | -0.455 | 0.3   | -1.519 | 0.129 | 0.634 | 0.19  | -1.924 | 0.054 | 0.353 | 1.141 |
| MYO1B       | -0.241 | 0.297 | -0.811 | 0.418 | 0.786 | 0.233 | -0.916 | 0.359 | 0.439 | 1.407 |
| MYO1A       | -0.001 | 0.295 | -0.004 | 0.997 | 0.999 | 0.295 | -0.004 | 0.997 | 0.56  | 1.781 |
| MYO19       | 0.928  | 0.321 | 2.893  | 0.004 | 2.531 | 0.812 | 1.885  | 0.059 | 1.349 | 4.747 |
| MYO16       | 0.486  | 0.303 | 1.607  | 0.108 | 1.626 | 0.492 | 1.273  | 0.203 | 0.899 | 2.942 |

|        |        |       |        |       |       |       |        |       |       |       |
|--------|--------|-------|--------|-------|-------|-------|--------|-------|-------|-------|
| MYO15B | -0.268 | 0.297 | -0.901 | 0.368 | 0.765 | 0.227 | -1.032 | 0.302 | 0.427 | 1.37  |
| MYO15A | 0.087  | 0.296 | 0.295  | 0.768 | 1.091 | 0.323 | 0.282  | 0.778 | 0.611 | 1.948 |
| MYO10  | 0.122  | 0.295 | 0.414  | 0.679 | 1.13  | 0.334 | 0.389  | 0.697 | 0.633 | 2.016 |
| MYNN   | 0.417  | 0.298 | 1.399  | 0.162 | 1.518 | 0.453 | 1.144  | 0.253 | 0.846 | 2.724 |
| MYMX   | -0.316 | 0.3   | -1.055 | 0.291 | 0.729 | 0.218 | -1.241 | 0.215 | 0.405 | 1.312 |
| MYLPF  | 0.041  | 0.297 | 0.137  | 0.891 | 1.041 | 0.309 | 0.134  | 0.893 | 0.582 | 1.863 |
| MYLK3  | 0.057  | 0.296 | 0.194  | 0.847 | 1.059 | 0.313 | 0.188  | 0.851 | 0.593 | 1.89  |
| MYLK   | -0.207 | 0.296 | -0.7   | 0.484 | 0.813 | 0.241 | -0.778 | 0.437 | 0.455 | 1.452 |
| MYLIP  | -0.674 | 0.305 | -2.214 | 0.027 | 0.509 | 0.155 | -3.161 | 0.002 | 0.28  | 0.926 |
| MYL9   | -0.471 | 0.3   | -1.572 | 0.116 | 0.624 | 0.187 | -2.008 | 0.045 | 0.347 | 1.123 |
| MYL7   | 0.087  | 0.296 | 0.295  | 0.768 | 1.091 | 0.323 | 0.282  | 0.778 | 0.611 | 1.947 |
| MYL6B  | 0.717  | 0.31  | 2.314  | 0.021 | 2.049 | 0.635 | 1.652  | 0.099 | 1.116 | 3.76  |
| MYL6   | 0.175  | 0.296 | 0.591  | 0.554 | 1.191 | 0.352 | 0.543  | 0.587 | 0.667 | 2.127 |
| MYL5   | 0.03   | 0.295 | 0.1    | 0.92  | 1.03  | 0.304 | 0.099  | 0.921 | 0.578 | 1.837 |
| MYL4   | -0.018 | 0.296 | -0.06  | 0.952 | 0.982 | 0.291 | -0.061 | 0.951 | 0.55  | 1.754 |
| MYL3   | 0.184  | 0.295 | 0.621  | 0.534 | 1.201 | 0.355 | 0.568  | 0.57  | 0.673 | 2.143 |
| MYL2   | -0.204 | 0.296 | -0.69  | 0.49  | 0.815 | 0.241 | -0.766 | 0.444 | 0.456 | 1.457 |
| MYL12B | -0.067 | 0.296 | -0.228 | 0.82  | 0.935 | 0.276 | -0.236 | 0.814 | 0.524 | 1.669 |
| MYL12A | 0.042  | 0.299 | 0.14   | 0.889 | 1.043 | 0.312 | 0.137  | 0.891 | 0.58  | 1.873 |
| MYL10  | -0.126 | 0.296 | -0.425 | 0.671 | 0.882 | 0.261 | -0.453 | 0.651 | 0.493 | 1.576 |
| MYL1   | 0.232  | 0.296 | 0.785  | 0.433 | 1.262 | 0.374 | 0.7    | 0.484 | 0.706 | 2.255 |
| MYH9   | -0.383 | 0.298 | -1.282 | 0.2   | 0.682 | 0.203 | -1.562 | 0.118 | 0.38  | 1.224 |
| MYH8   | 0.144  | 0.296 | 0.485  | 0.628 | 1.154 | 0.342 | 0.451  | 0.652 | 0.646 | 2.064 |
| MYH7B  | 0.299  | 0.3   | 0.997  | 0.319 | 1.348 | 0.404 | 0.862  | 0.389 | 0.749 | 2.426 |
| MYH7   | 0.425  | 0.302 | 1.406  | 0.16  | 1.53  | 0.463 | 1.145  | 0.252 | 0.846 | 2.768 |
| MYH6   | 0.398  | 0.303 | 1.314  | 0.189 | 1.488 | 0.45  | 1.084  | 0.278 | 0.822 | 2.692 |
| MYH4   | -0.395 | 0.3   | -1.317 | 0.188 | 0.674 | 0.202 | -1.614 | 0.106 | 0.374 | 1.213 |
| MYH3   | 0.555  | 0.302 | 1.837  | 0.066 | 1.743 | 0.527 | 1.41   | 0.159 | 0.964 | 3.151 |
| MYH2   | 0.276  | 0.298 | 0.927  | 0.354 | 1.318 | 0.392 | 0.81   | 0.418 | 0.735 | 2.361 |
| MYH15  | 0.594  | 0.306 | 1.942  | 0.052 | 1.811 | 0.553 | 1.465  | 0.143 | 0.995 | 3.296 |
| MYH14  | -0.355 | 0.298 | -1.19  | 0.234 | 0.701 | 0.209 | -1.428 | 0.153 | 0.391 | 1.258 |
| MYH13  | 0.328  | 0.298 | 1.101  | 0.271 | 1.388 | 0.413 | 0.938  | 0.348 | 0.774 | 2.488 |
| MYH11  | -0.301 | 0.296 | -1.016 | 0.31  | 0.74  | 0.219 | -1.186 | 0.236 | 0.414 | 1.323 |
| MYH10  | -0.401 | 0.3   | -1.337 | 0.181 | 0.67  | 0.201 | -1.645 | 0.1   | 0.372 | 1.205 |
| MYH1   | 0.144  | 0.296 | 0.485  | 0.627 | 1.154 | 0.342 | 0.452  | 0.651 | 0.646 | 2.062 |
| MYG1   | -0.545 | 0.306 | -1.784 | 0.074 | 0.58  | 0.177 | -2.371 | 0.018 | 0.319 | 1.055 |
| MYF6   | -0.119 | 0.296 | -0.402 | 0.687 | 0.888 | 0.263 | -0.427 | 0.669 | 0.496 | 1.587 |
| MYF5   | 1.093  | 0.325 | 3.363  | 0.001 | 2.984 | 0.97  | 2.045  | 0.041 | 1.578 | 5.644 |

|         |        |       |        |       |       |       |        |       |       |       |
|---------|--------|-------|--------|-------|-------|-------|--------|-------|-------|-------|
| MYEF2   | 0.941  | 0.317 | 2.967  | 0.003 | 2.564 | 0.814 | 1.922  | 0.055 | 1.376 | 4.776 |
| MYDGF   | 0.278  | 0.298 | 0.933  | 0.351 | 1.32  | 0.394 | 0.814  | 0.416 | 0.736 | 2.368 |
| MYD88   | 0.126  | 0.296 | 0.424  | 0.672 | 1.134 | 0.336 | 0.398  | 0.691 | 0.634 | 2.026 |
| MYCT1   | -0.379 | 0.3   | -1.265 | 0.206 | 0.685 | 0.205 | -1.538 | 0.124 | 0.381 | 1.232 |
| MYCNOS  | 0.521  | 0.306 | 1.706  | 0.088 | 1.684 | 0.515 | 1.329  | 0.184 | 0.925 | 3.065 |
| MYCN    | -0.14  | 0.295 | -0.476 | 0.634 | 0.869 | 0.257 | -0.511 | 0.61  | 0.487 | 1.551 |
| MYCL    | -0.051 | 0.295 | -0.172 | 0.863 | 0.95  | 0.281 | -0.176 | 0.86  | 0.533 | 1.695 |
| MYCBP2  | -0.403 | 0.298 | -1.351 | 0.177 | 0.669 | 0.199 | -1.664 | 0.096 | 0.373 | 1.199 |
| MYC     | 0.641  | 0.306 | 2.096  | 0.036 | 1.898 | 0.58  | 1.548  | 0.122 | 1.043 | 3.454 |
| MYBPH   | -0.855 | 0.312 | -2.738 | 0.006 | 0.425 | 0.133 | -4.327 | 0     | 0.231 | 0.784 |
| MYBPC3  | 0.02   | 0.297 | 0.067  | 0.946 | 1.02  | 0.303 | 0.067  | 0.947 | 0.57  | 1.826 |
| MYBPC2  | 0.603  | 0.303 | 1.99   | 0.047 | 1.828 | 0.554 | 1.494  | 0.135 | 1.009 | 3.312 |
| MYBPC1  | -0.197 | 0.296 | -0.663 | 0.507 | 0.822 | 0.243 | -0.733 | 0.464 | 0.46  | 1.469 |
| MYBL2   | 0.387  | 0.298 | 1.3    | 0.194 | 1.472 | 0.438 | 1.078  | 0.281 | 0.822 | 2.639 |
| MYBL1   | 0.511  | 0.302 | 1.691  | 0.091 | 1.667 | 0.504 | 1.324  | 0.186 | 0.922 | 3.016 |
| MYBBP1A | 0.225  | 0.298 | 0.756  | 0.45  | 1.253 | 0.374 | 0.677  | 0.498 | 0.698 | 2.248 |
| MYB     | -0.434 | 0.302 | -1.437 | 0.151 | 0.648 | 0.196 | -1.8   | 0.072 | 0.358 | 1.171 |
| MXRA8   | -0.274 | 0.296 | -0.924 | 0.356 | 0.761 | 0.225 | -1.063 | 0.288 | 0.425 | 1.359 |
| MXRA7   | -0.493 | 0.302 | -1.631 | 0.103 | 0.611 | 0.185 | -2.108 | 0.035 | 0.338 | 1.105 |
| MXRA5   | -0.45  | 0.3   | -1.504 | 0.133 | 0.637 | 0.191 | -1.899 | 0.058 | 0.354 | 1.147 |
| MXI1    | -0.129 | 0.296 | -0.435 | 0.664 | 0.879 | 0.26  | -0.464 | 0.643 | 0.492 | 1.57  |
| MXD3    | 0.511  | 0.3   | 1.702  | 0.089 | 1.666 | 0.5   | 1.333  | 0.183 | 0.926 | 3.001 |
| MXD1    | -0.233 | 0.297 | -0.786 | 0.432 | 0.792 | 0.235 | -0.886 | 0.376 | 0.443 | 1.416 |
| MX2     | 0.279  | 0.301 | 0.928  | 0.353 | 1.322 | 0.398 | 0.81   | 0.418 | 0.733 | 2.384 |
| MX1     | 0.384  | 0.3   | 1.281  | 0.2   | 1.468 | 0.44  | 1.063  | 0.288 | 0.816 | 2.643 |
| MVP     | -0.447 | 0.303 | -1.476 | 0.14  | 0.639 | 0.194 | -1.861 | 0.063 | 0.353 | 1.158 |
| MVK     | -0.203 | 0.301 | -0.674 | 0.5   | 0.817 | 0.245 | -0.748 | 0.455 | 0.453 | 1.472 |
| MVD     | -0.023 | 0.295 | -0.076 | 0.939 | 0.978 | 0.289 | -0.077 | 0.938 | 0.548 | 1.744 |
| MVB12B  | 0.732  | 0.307 | 2.385  | 0.017 | 2.079 | 0.638 | 1.692  | 0.091 | 1.139 | 3.793 |
| MUTYH   | 0.393  | 0.302 | 1.301  | 0.193 | 1.482 | 0.448 | 1.075  | 0.282 | 0.819 | 2.681 |
| MUSK    | 0.351  | 0.3   | 1.172  | 0.241 | 1.421 | 0.426 | 0.988  | 0.323 | 0.79  | 2.557 |
| MUS81   | 0.27   | 0.297 | 0.909  | 0.363 | 1.31  | 0.389 | 0.797  | 0.425 | 0.732 | 2.343 |
| MUL1    | -0.035 | 0.296 | -0.118 | 0.906 | 0.966 | 0.286 | -0.12  | 0.905 | 0.541 | 1.725 |
| MUC8    | 0.189  | 0.298 | 0.634  | 0.526 | 1.208 | 0.36  | 0.578  | 0.563 | 0.674 | 2.167 |
| MUC7    | 0.045  | 0.295 | 0.154  | 0.878 | 1.046 | 0.309 | 0.15   | 0.881 | 0.587 | 1.866 |
| MUC6    | 0.112  | 0.295 | 0.38   | 0.704 | 1.119 | 0.33  | 0.359  | 0.72  | 0.627 | 1.995 |
| MUC5B   | 0.154  | 0.298 | 0.518  | 0.605 | 1.167 | 0.348 | 0.48   | 0.631 | 0.651 | 2.092 |
| MUC5AC  | 0.191  | 0.298 | 0.641  | 0.522 | 1.21  | 0.36  | 0.584  | 0.559 | 0.675 | 2.168 |

|        |        |       |        |       |       |       |        |       |       |       |
|--------|--------|-------|--------|-------|-------|-------|--------|-------|-------|-------|
| MUC4   | 0.184  | 0.296 | 0.623  | 0.533 | 1.202 | 0.356 | 0.569  | 0.57  | 0.673 | 2.148 |
| MUC3B  | -0.069 | 0.295 | -0.233 | 0.816 | 0.933 | 0.276 | -0.241 | 0.809 | 0.523 | 1.666 |
| MUC3A  | 0.065  | 0.298 | 0.216  | 0.829 | 1.067 | 0.318 | 0.209  | 0.834 | 0.594 | 1.914 |
| MUC2   | 0.37   | 0.3   | 1.236  | 0.216 | 1.448 | 0.434 | 1.033  | 0.301 | 0.805 | 2.606 |
| MUC16  | -0.219 | 0.296 | -0.741 | 0.459 | 0.803 | 0.238 | -0.828 | 0.408 | 0.45  | 1.434 |
| MUC13  | 0.137  | 0.296 | 0.461  | 0.645 | 1.147 | 0.34  | 0.431  | 0.666 | 0.641 | 2.05  |
| MUC1   | -0.374 | 0.3   | -1.249 | 0.212 | 0.688 | 0.206 | -1.514 | 0.13  | 0.382 | 1.237 |
| MTX2   | -0.027 | 0.295 | -0.093 | 0.926 | 0.973 | 0.287 | -0.094 | 0.925 | 0.546 | 1.736 |
| MTX1   | 1.07   | 0.321 | 3.33   | 0.001 | 2.916 | 0.937 | 2.044  | 0.041 | 1.553 | 5.475 |
| MTUS2  | 0.798  | 0.31  | 2.575  | 0.01  | 2.221 | 0.688 | 1.774  | 0.076 | 1.21  | 4.076 |
| MTUS1  | -0.967 | 0.321 | -3.016 | 0.003 | 0.38  | 0.122 | -5.084 | 0     | 0.203 | 0.713 |
| MTPP   | -0.045 | 0.295 | -0.153 | 0.878 | 0.956 | 0.282 | -0.156 | 0.876 | 0.536 | 1.705 |
| MTSS2  | 0.366  | 0.298 | 1.229  | 0.219 | 1.442 | 0.43  | 1.029  | 0.304 | 0.804 | 2.588 |
| MTSS1  | 0.361  | 0.298 | 1.214  | 0.225 | 1.435 | 0.427 | 1.019  | 0.308 | 0.801 | 2.572 |
| MTRR   | 0.065  | 0.295 | 0.222  | 0.825 | 1.068 | 0.315 | 0.215  | 0.83  | 0.598 | 1.905 |
| MTRF1L | 0.095  | 0.297 | 0.319  | 0.75  | 1.099 | 0.326 | 0.304  | 0.761 | 0.614 | 1.967 |
| MTRF1  | 0.204  | 0.297 | 0.687  | 0.492 | 1.226 | 0.364 | 0.621  | 0.534 | 0.686 | 2.192 |
| MTREX  | -0.124 | 0.296 | -0.419 | 0.675 | 0.883 | 0.262 | -0.446 | 0.656 | 0.494 | 1.579 |
| MTR    | 0.018  | 0.295 | 0.062  | 0.951 | 1.018 | 0.301 | 0.061  | 0.951 | 0.571 | 1.817 |
| MTPAP  | -0.059 | 0.295 | -0.198 | 0.843 | 0.943 | 0.279 | -0.204 | 0.838 | 0.529 | 1.683 |
| MTOR   | 0.072  | 0.295 | 0.242  | 0.809 | 1.074 | 0.317 | 0.234  | 0.815 | 0.602 | 1.917 |
| MTO1   | 0.365  | 0.299 | 1.22   | 0.222 | 1.44  | 0.43  | 1.023  | 0.306 | 0.802 | 2.586 |
| MTNR1B | -0.128 | 0.296 | -0.434 | 0.665 | 0.88  | 0.26  | -0.463 | 0.644 | 0.493 | 1.57  |
| MTNR1A | -0.538 | 0.303 | -1.774 | 0.076 | 0.584 | 0.177 | -2.35  | 0.019 | 0.322 | 1.058 |
| MTMR9  | -0.53  | 0.304 | -1.741 | 0.082 | 0.589 | 0.179 | -2.295 | 0.022 | 0.324 | 1.069 |
| MTMR7  | 1.164  | 0.328 | 3.544  | 0     | 3.201 | 1.051 | 2.094  | 0.036 | 1.682 | 6.093 |
| MTMR6  | 0.086  | 0.295 | 0.292  | 0.771 | 1.09  | 0.322 | 0.279  | 0.78  | 0.611 | 1.944 |
| MTMR4  | 0.268  | 0.298 | 0.9    | 0.368 | 1.307 | 0.389 | 0.79   | 0.43  | 0.729 | 2.343 |
| MTMR3  | 0.022  | 0.296 | 0.075  | 0.94  | 1.023 | 0.303 | 0.074  | 0.941 | 0.573 | 1.826 |
| MTMR2  | 0.227  | 0.297 | 0.765  | 0.445 | 1.255 | 0.373 | 0.684  | 0.494 | 0.701 | 2.246 |
| MTMR14 | 0.671  | 0.31  | 2.168  | 0.03  | 1.957 | 0.606 | 1.579  | 0.114 | 1.067 | 3.591 |
| MTMR12 | 0.842  | 0.315 | 2.674  | 0.007 | 2.321 | 0.731 | 1.808  | 0.071 | 1.252 | 4.301 |
| MTMR11 | -0.182 | 0.296 | -0.615 | 0.539 | 0.833 | 0.247 | -0.674 | 0.5   | 0.466 | 1.49  |
| MTMR10 | -0.087 | 0.296 | -0.295 | 0.768 | 0.916 | 0.271 | -0.308 | 0.758 | 0.513 | 1.637 |
| MTMR1  | 0.328  | 0.298 | 1.101  | 0.271 | 1.389 | 0.414 | 0.938  | 0.348 | 0.774 | 2.492 |
| MTM1   | 0.101  | 0.298 | 0.34   | 0.733 | 1.107 | 0.33  | 0.324  | 0.746 | 0.617 | 1.984 |
| MTIF2  | 0.3    | 0.298 | 1.007  | 0.314 | 1.349 | 0.402 | 0.87   | 0.384 | 0.753 | 2.418 |
| MTHFSD | 0.208  | 0.296 | 0.704  | 0.482 | 1.232 | 0.365 | 0.635  | 0.525 | 0.689 | 2.201 |

|         |        |       |        |       |       |       |        |       |       |       |
|---------|--------|-------|--------|-------|-------|-------|--------|-------|-------|-------|
| MTHFR   | 0.132  | 0.297 | 0.445  | 0.657 | 1.141 | 0.339 | 0.416  | 0.677 | 0.638 | 2.042 |
| MTHFD2L | 0.636  | 0.306 | 2.079  | 0.038 | 1.888 | 0.578 | 1.538  | 0.124 | 1.037 | 3.439 |
| MTHFD2  | 0.341  | 0.3   | 1.136  | 0.256 | 1.407 | 0.423 | 0.962  | 0.336 | 0.781 | 2.535 |
| MTHFD1  | 1.025  | 0.321 | 3.196  | 0.001 | 2.788 | 0.894 | 1.999  | 0.046 | 1.486 | 5.228 |
| MTG1    | 0.237  | 0.296 | 0.799  | 0.425 | 1.267 | 0.375 | 0.711  | 0.477 | 0.709 | 2.264 |
| MTFR1   | 0.147  | 0.296 | 0.499  | 0.618 | 1.159 | 0.343 | 0.464  | 0.643 | 0.649 | 2.069 |
| MTF2    | -0.305 | 0.297 | -1.029 | 0.304 | 0.737 | 0.219 | -1.203 | 0.229 | 0.412 | 1.319 |
| MTF1    | -0.135 | 0.297 | -0.454 | 0.65  | 0.874 | 0.259 | -0.486 | 0.627 | 0.488 | 1.564 |
| MTERF4  | -0.135 | 0.296 | -0.456 | 0.649 | 0.874 | 0.259 | -0.488 | 0.626 | 0.489 | 1.561 |
| MTERF3  | 0.581  | 0.306 | 1.901  | 0.057 | 1.788 | 0.547 | 1.442  | 0.149 | 0.982 | 3.256 |
| MTERF1  | 0.134  | 0.295 | 0.453  | 0.651 | 1.143 | 0.338 | 0.424  | 0.672 | 0.641 | 2.039 |
| MTDH    | 1.076  | 0.328 | 3.284  | 0.001 | 2.934 | 0.962 | 2.011  | 0.044 | 1.543 | 5.577 |
| MTCL1   | -0.04  | 0.297 | -0.133 | 0.894 | 0.961 | 0.286 | -0.136 | 0.892 | 0.537 | 1.722 |
| MTCH2   | 0.543  | 0.299 | 1.815  | 0.069 | 1.722 | 0.515 | 1.401  | 0.161 | 0.958 | 3.095 |
| MTCH1   | 0.568  | 0.306 | 1.856  | 0.063 | 1.765 | 0.54  | 1.416  | 0.157 | 0.969 | 3.217 |
| MTARC2  | 0.381  | 0.298 | 1.278  | 0.201 | 1.463 | 0.436 | 1.062  | 0.288 | 0.816 | 2.624 |
| MTARC1  | -0.275 | 0.298 | -0.926 | 0.355 | 0.759 | 0.226 | -1.066 | 0.287 | 0.424 | 1.36  |
| MTAP    | -0.018 | 0.295 | -0.061 | 0.952 | 0.982 | 0.29  | -0.061 | 0.951 | 0.551 | 1.752 |
| MTA2    | 0.322  | 0.298 | 1.078  | 0.281 | 1.38  | 0.412 | 0.922  | 0.356 | 0.769 | 2.476 |
| MTA1    | -0.479 | 0.3   | -1.597 | 0.11  | 0.62  | 0.186 | -2.048 | 0.041 | 0.344 | 1.115 |
| MT4     | -0.054 | 0.295 | -0.181 | 0.856 | 0.948 | 0.28  | -0.186 | 0.852 | 0.531 | 1.691 |
| MT3     | -0.055 | 0.296 | -0.185 | 0.854 | 0.947 | 0.281 | -0.19  | 0.85  | 0.53  | 1.692 |
| MT2A    | 0.335  | 0.296 | 1.13   | 0.259 | 1.398 | 0.414 | 0.96   | 0.337 | 0.782 | 2.498 |
| MT1X    | 0.402  | 0.298 | 1.35   | 0.177 | 1.494 | 0.445 | 1.112  | 0.266 | 0.834 | 2.678 |
| MT1M    | -0.102 | 0.299 | -0.342 | 0.732 | 0.903 | 0.27  | -0.36  | 0.719 | 0.502 | 1.622 |
| MT1HL1  | 0.209  | 0.295 | 0.707  | 0.479 | 1.232 | 0.364 | 0.638  | 0.523 | 0.691 | 2.198 |
| MT1H    | 0.583  | 0.302 | 1.927  | 0.054 | 1.791 | 0.541 | 1.461  | 0.144 | 0.99  | 3.239 |
| MT1G    | 0.413  | 0.298 | 1.388  | 0.165 | 1.512 | 0.45  | 1.137  | 0.255 | 0.843 | 2.709 |
| MT1F    | 0.239  | 0.295 | 0.809  | 0.419 | 1.27  | 0.375 | 0.719  | 0.472 | 0.712 | 2.265 |
| MT1E    | 0.328  | 0.296 | 1.109  | 0.268 | 1.389 | 0.411 | 0.945  | 0.345 | 0.777 | 2.482 |
| MSX2    | 0.009  | 0.295 | 0.031  | 0.975 | 1.009 | 0.298 | 0.031  | 0.975 | 0.566 | 1.8   |
| MSX1    | -0.007 | 0.296 | -0.022 | 0.982 | 0.993 | 0.294 | -0.023 | 0.982 | 0.556 | 1.774 |
| MSTN    | -0.367 | 0.3   | -1.222 | 0.222 | 0.693 | 0.208 | -1.476 | 0.14  | 0.385 | 1.248 |
| MST1R   | 0.073  | 0.295 | 0.247  | 0.805 | 1.076 | 0.318 | 0.238  | 0.812 | 0.603 | 1.918 |
| MST1L   | -0.125 | 0.296 | -0.421 | 0.674 | 0.883 | 0.261 | -0.448 | 0.654 | 0.494 | 1.577 |
| MST1    | -0.267 | 0.296 | -0.901 | 0.368 | 0.766 | 0.227 | -1.033 | 0.302 | 0.428 | 1.369 |
| MSRB2   | 0.556  | 0.303 | 1.834  | 0.067 | 1.744 | 0.529 | 1.406  | 0.16  | 0.962 | 3.16  |
| MSRB1   | -0.402 | 0.3   | -1.339 | 0.18  | 0.669 | 0.201 | -1.648 | 0.099 | 0.372 | 1.204 |

|         |        |       |        |       |       |       |        |       |       |       |
|---------|--------|-------|--------|-------|-------|-------|--------|-------|-------|-------|
| MSRA    | 0.432  | 0.3   | 1.439  | 0.15  | 1.54  | 0.462 | 1.169  | 0.242 | 0.855 | 2.771 |
| MSR1    | -0.204 | 0.296 | -0.688 | 0.491 | 0.816 | 0.242 | -0.763 | 0.445 | 0.456 | 1.457 |
| MSN     | -0.364 | 0.298 | -1.22  | 0.223 | 0.695 | 0.207 | -1.471 | 0.141 | 0.387 | 1.247 |
| MSMO1   | 0.266  | 0.296 | 0.897  | 0.37  | 1.304 | 0.386 | 0.788  | 0.431 | 0.73  | 2.331 |
| MSMB    | -0.287 | 0.298 | -0.965 | 0.335 | 0.75  | 0.223 | -1.118 | 0.264 | 0.419 | 1.345 |
| MSLN    | 0.335  | 0.298 | 1.124  | 0.261 | 1.398 | 0.417 | 0.955  | 0.34  | 0.779 | 2.507 |
| MSL3    | -0.116 | 0.296 | -0.394 | 0.694 | 0.89  | 0.263 | -0.418 | 0.676 | 0.499 | 1.588 |
| MSL2    | 0.022  | 0.295 | 0.076  | 0.94  | 1.023 | 0.302 | 0.075  | 0.94  | 0.573 | 1.823 |
| MSL1    | 0.112  | 0.295 | 0.38   | 0.704 | 1.119 | 0.33  | 0.359  | 0.719 | 0.627 | 1.996 |
| MSI1    | -0.084 | 0.295 | -0.284 | 0.777 | 0.92  | 0.272 | -0.296 | 0.767 | 0.515 | 1.641 |
| MSH6    | 0.126  | 0.299 | 0.422  | 0.673 | 1.134 | 0.339 | 0.397  | 0.691 | 0.632 | 2.037 |
| MSH4    | -0.175 | 0.296 | -0.592 | 0.554 | 0.839 | 0.249 | -0.647 | 0.518 | 0.469 | 1.5   |
| MSH3    | 0.04   | 0.296 | 0.136  | 0.892 | 1.041 | 0.308 | 0.133  | 0.894 | 0.583 | 1.859 |
| MSH2    | 0.252  | 0.296 | 0.851  | 0.395 | 1.287 | 0.381 | 0.752  | 0.452 | 0.72  | 2.299 |
| MSC     | -0.347 | 0.3   | -1.156 | 0.248 | 0.707 | 0.212 | -1.382 | 0.167 | 0.393 | 1.273 |
| MSANTD2 | 0.27   | 0.3   | 0.901  | 0.368 | 1.31  | 0.392 | 0.79   | 0.43  | 0.728 | 2.356 |
| MS4A6A  | -0.532 | 0.302 | -1.76  | 0.078 | 0.587 | 0.178 | -2.324 | 0.02  | 0.325 | 1.062 |
| MS4A5   | -0.177 | 0.296 | -0.599 | 0.549 | 0.838 | 0.248 | -0.655 | 0.512 | 0.469 | 1.496 |
| MS4A4A  | 0.181  | 0.296 | 0.611  | 0.541 | 1.199 | 0.355 | 0.559  | 0.576 | 0.67  | 2.143 |
| MS4A3   | -0.125 | 0.296 | -0.421 | 0.674 | 0.883 | 0.261 | -0.449 | 0.654 | 0.494 | 1.577 |
| MS4A2   | -0.94  | 0.321 | -2.923 | 0.003 | 0.391 | 0.126 | -4.851 | 0     | 0.208 | 0.734 |
| MS4A12  | -0.303 | 0.297 | -1.018 | 0.309 | 0.739 | 0.22  | -1.189 | 0.234 | 0.412 | 1.323 |
| MS4A1   | -1.043 | 0.322 | -3.237 | 0.001 | 0.352 | 0.114 | -5.703 | 0     | 0.187 | 0.663 |
| MRTO4   | 0.331  | 0.298 | 1.114  | 0.265 | 1.393 | 0.415 | 0.948  | 0.343 | 0.777 | 2.496 |
| MRTFB   | -0.401 | 0.3   | -1.336 | 0.182 | 0.669 | 0.201 | -1.644 | 0.1   | 0.372 | 1.206 |
| MRTFA   | 0.223  | 0.296 | 0.755  | 0.45  | 1.25  | 0.37  | 0.676  | 0.499 | 0.7   | 2.234 |
| MRS2    | -0.014 | 0.297 | -0.049 | 0.961 | 0.986 | 0.292 | -0.049 | 0.961 | 0.551 | 1.763 |
| MRPS7   | 0.144  | 0.295 | 0.489  | 0.625 | 1.155 | 0.341 | 0.455  | 0.649 | 0.648 | 2.06  |
| MRPS35  | -0.439 | 0.3   | -1.464 | 0.143 | 0.645 | 0.193 | -1.838 | 0.066 | 0.358 | 1.161 |
| MRPS34  | -0.174 | 0.295 | -0.588 | 0.557 | 0.841 | 0.248 | -0.642 | 0.521 | 0.471 | 1.5   |
| MRPS33  | 0.03   | 0.295 | 0.101  | 0.92  | 1.03  | 0.304 | 0.099  | 0.921 | 0.578 | 1.837 |
| MRPS31  | -0.031 | 0.295 | -0.103 | 0.918 | 0.97  | 0.286 | -0.105 | 0.916 | 0.544 | 1.73  |
| MRPS30  | -0.09  | 0.296 | -0.303 | 0.762 | 0.914 | 0.271 | -0.317 | 0.751 | 0.512 | 1.634 |
| MRPS28  | 0.514  | 0.3   | 1.714  | 0.087 | 1.672 | 0.501 | 1.34   | 0.18  | 0.929 | 3.009 |
| MRPS27  | -0.542 | 0.311 | -1.745 | 0.081 | 0.582 | 0.181 | -2.316 | 0.021 | 0.316 | 1.069 |
| MRPS22  | 0.527  | 0.3   | 1.754  | 0.079 | 1.694 | 0.509 | 1.364  | 0.173 | 0.94  | 3.051 |
| MRPS2   | -0.432 | 0.303 | -1.426 | 0.154 | 0.649 | 0.197 | -1.784 | 0.075 | 0.359 | 1.175 |
| MRPS18C | 0.273  | 0.296 | 0.921  | 0.357 | 1.314 | 0.389 | 0.806  | 0.42  | 0.735 | 2.347 |



|         |        |       |        |       |       |       |        |       |       |       |
|---------|--------|-------|--------|-------|-------|-------|--------|-------|-------|-------|
| MRPS18B | 0.807  | 0.312 | 2.589  | 0.01  | 2.242 | 0.699 | 1.776  | 0.076 | 1.217 | 4.13  |
| MRPS18A | 1.34   | 0.339 | 3.951  | 0     | 3.819 | 1.296 | 2.176  | 0.03  | 1.965 | 7.426 |
| MRPS17  | 0.68   | 0.306 | 2.225  | 0.026 | 1.975 | 0.604 | 1.614  | 0.107 | 1.084 | 3.596 |
| MRPS16  | 0.674  | 0.304 | 2.219  | 0.026 | 1.961 | 0.595 | 1.615  | 0.106 | 1.082 | 3.556 |
| MRPS15  | 0.006  | 0.295 | 0.019  | 0.985 | 1.006 | 0.297 | 0.019  | 0.985 | 0.564 | 1.793 |
| MRPS14  | 0.037  | 0.295 | 0.126  | 0.9   | 1.038 | 0.306 | 0.123  | 0.902 | 0.582 | 1.85  |
| MRPS12  | 0.541  | 0.302 | 1.789  | 0.074 | 1.718 | 0.519 | 1.382  | 0.167 | 0.95  | 3.106 |
| MRPS11  | 0.3    | 0.298 | 1.006  | 0.315 | 1.349 | 0.402 | 0.869  | 0.385 | 0.753 | 2.419 |
| MRPS10  | 0.933  | 0.321 | 2.909  | 0.004 | 2.543 | 0.816 | 1.891  | 0.059 | 1.356 | 4.77  |
| MRPL9   | 0.435  | 0.299 | 1.456  | 0.146 | 1.546 | 0.462 | 1.18   | 0.238 | 0.86  | 2.778 |
| MRPL58  | 0.167  | 0.296 | 0.564  | 0.573 | 1.182 | 0.35  | 0.519  | 0.604 | 0.661 | 2.111 |
| MRPL57  | 0.896  | 0.315 | 2.842  | 0.004 | 2.449 | 0.772 | 1.877  | 0.06  | 1.321 | 4.543 |
| MRPL52  | 0.52   | 0.302 | 1.722  | 0.085 | 1.683 | 0.508 | 1.342  | 0.18  | 0.93  | 3.042 |
| MRPL49  | -0.257 | 0.296 | -0.866 | 0.386 | 0.774 | 0.229 | -0.988 | 0.323 | 0.433 | 1.383 |
| MRPL48  | 0.439  | 0.3   | 1.465  | 0.143 | 1.551 | 0.465 | 1.186  | 0.236 | 0.862 | 2.791 |
| MRPL46  | 0.458  | 0.3   | 1.528  | 0.126 | 1.581 | 0.474 | 1.226  | 0.22  | 0.879 | 2.846 |
| MRPL44  | -0.115 | 0.296 | -0.389 | 0.697 | 0.891 | 0.263 | -0.412 | 0.68  | 0.5   | 1.591 |
| MRPL42  | -0.113 | 0.296 | -0.38  | 0.704 | 0.894 | 0.265 | -0.402 | 0.688 | 0.5   | 1.597 |
| MRPL41  | 0.057  | 0.296 | 0.192  | 0.848 | 1.059 | 0.313 | 0.187  | 0.852 | 0.592 | 1.891 |
| MRPL40  | -0.056 | 0.297 | -0.19  | 0.85  | 0.945 | 0.281 | -0.195 | 0.845 | 0.528 | 1.692 |
| MRPL4   | 0.261  | 0.297 | 0.879  | 0.38  | 1.298 | 0.386 | 0.773  | 0.439 | 0.725 | 2.325 |
| MRPL39  | 0.157  | 0.295 | 0.531  | 0.595 | 1.17  | 0.345 | 0.491  | 0.623 | 0.656 | 2.086 |
| MRPL35  | -0.067 | 0.297 | -0.224 | 0.823 | 0.936 | 0.278 | -0.231 | 0.817 | 0.522 | 1.676 |
| MRPL34  | 0.176  | 0.298 | 0.59   | 0.555 | 1.192 | 0.356 | 0.541  | 0.588 | 0.665 | 2.14  |
| MRPL33  | 0.355  | 0.298 | 1.19   | 0.234 | 1.426 | 0.425 | 1.002  | 0.316 | 0.795 | 2.559 |
| MRPL3   | 0.314  | 0.298 | 1.055  | 0.291 | 1.369 | 0.408 | 0.905  | 0.365 | 0.764 | 2.454 |
| MRPL28  | 0.472  | 0.299 | 1.574  | 0.115 | 1.602 | 0.48  | 1.255  | 0.209 | 0.891 | 2.882 |
| MRPL24  | -0.05  | 0.295 | -0.168 | 0.866 | 0.951 | 0.281 | -0.173 | 0.863 | 0.533 | 1.698 |
| MRPL23  | 0.808  | 0.311 | 2.599  | 0.009 | 2.243 | 0.697 | 1.783  | 0.075 | 1.22  | 4.125 |
| MRPL22  | 0.329  | 0.297 | 1.11   | 0.267 | 1.39  | 0.412 | 0.946  | 0.344 | 0.777 | 2.486 |
| MRPL20  | 0.245  | 0.298 | 0.824  | 0.41  | 1.278 | 0.381 | 0.731  | 0.465 | 0.713 | 2.291 |
| MRPL2   | 0.284  | 0.298 | 0.955  | 0.339 | 1.329 | 0.396 | 0.831  | 0.406 | 0.741 | 2.382 |
| MRPL19  | 0.177  | 0.296 | 0.597  | 0.55  | 1.193 | 0.353 | 0.547  | 0.584 | 0.668 | 2.132 |
| MRPL18  | 0.373  | 0.298 | 1.253  | 0.21  | 1.452 | 0.432 | 1.046  | 0.296 | 0.81  | 2.603 |
| MRPL17  | 0.575  | 0.302 | 1.905  | 0.057 | 1.777 | 0.536 | 1.449  | 0.147 | 0.984 | 3.21  |
| MRPL16  | 0.718  | 0.31  | 2.32   | 0.02  | 2.051 | 0.635 | 1.655  | 0.098 | 1.118 | 3.764 |
| MRPL15  | 0.477  | 0.3   | 1.592  | 0.111 | 1.611 | 0.483 | 1.266  | 0.206 | 0.896 | 2.9   |
| MRPL13  | 0.928  | 0.315 | 2.945  | 0.003 | 2.53  | 0.797 | 1.919  | 0.055 | 1.364 | 4.692 |

|           |        |       |        |       |       |       |        |       |       |       |
|-----------|--------|-------|--------|-------|-------|-------|--------|-------|-------|-------|
| MRPL12    | 0.522  | 0.302 | 1.727  | 0.084 | 1.685 | 0.509 | 1.346  | 0.178 | 0.932 | 3.048 |
| MRPL11    | 0.483  | 0.303 | 1.597  | 0.11  | 1.621 | 0.491 | 1.266  | 0.205 | 0.896 | 2.934 |
| MROH9     | -0.118 | 0.296 | -0.397 | 0.691 | 0.889 | 0.263 | -0.421 | 0.673 | 0.498 | 1.588 |
| MROH7     | -0.644 | 0.304 | -2.116 | 0.034 | 0.525 | 0.16  | -2.969 | 0.003 | 0.289 | 0.954 |
| MRNIP     | -0.604 | 0.306 | -1.975 | 0.048 | 0.546 | 0.167 | -2.713 | 0.007 | 0.3   | 0.995 |
| MRM3      | 0.222  | 0.295 | 0.751  | 0.453 | 1.248 | 0.369 | 0.673  | 0.501 | 0.7   | 2.227 |
| MRM2      | 1.058  | 0.321 | 3.291  | 0.001 | 2.88  | 0.926 | 2.031  | 0.042 | 1.534 | 5.407 |
| MRM1      | -0.165 | 0.296 | -0.558 | 0.577 | 0.848 | 0.251 | -0.607 | 0.544 | 0.474 | 1.515 |
| MRGBP     | 0.527  | 0.302 | 1.741  | 0.082 | 1.693 | 0.512 | 1.353  | 0.176 | 0.936 | 3.063 |
| MRFAP1L1  | -0.288 | 0.297 | -0.967 | 0.334 | 0.75  | 0.223 | -1.12  | 0.263 | 0.419 | 1.344 |
| MREG      | -0.459 | 0.303 | -1.518 | 0.129 | 0.632 | 0.191 | -1.927 | 0.054 | 0.349 | 1.143 |
| MRE11     | 0.451  | 0.3   | 1.506  | 0.132 | 1.57  | 0.471 | 1.212  | 0.225 | 0.873 | 2.826 |
| MRC2      | -0.43  | 0.298 | -1.441 | 0.15  | 0.651 | 0.194 | -1.8   | 0.072 | 0.363 | 1.167 |
| MRC1      | -0.343 | 0.299 | -1.148 | 0.251 | 0.71  | 0.212 | -1.369 | 0.171 | 0.395 | 1.275 |
| MRAS      | 0.001  | 0.295 | 0.004  | 0.997 | 1.001 | 0.295 | 0.004  | 0.997 | 0.561 | 1.785 |
| MR1       | 0.095  | 0.295 | 0.322  | 0.748 | 1.1   | 0.325 | 0.307  | 0.759 | 0.617 | 1.961 |
| MPZL2     | 0.405  | 0.3   | 1.351  | 0.177 | 1.499 | 0.449 | 1.111  | 0.267 | 0.833 | 2.697 |
| MPZL1     | -0.681 | 0.307 | -2.223 | 0.026 | 0.506 | 0.155 | -3.187 | 0.001 | 0.277 | 0.922 |
| MPZ       | -0.221 | 0.297 | -0.745 | 0.456 | 0.802 | 0.238 | -0.834 | 0.405 | 0.448 | 1.434 |
| MPV17     | 0.037  | 0.295 | 0.126  | 0.9   | 1.038 | 0.306 | 0.124  | 0.902 | 0.582 | 1.851 |
| MPST      | 0.335  | 0.298 | 1.124  | 0.261 | 1.398 | 0.417 | 0.955  | 0.34  | 0.779 | 2.507 |
| MPRIP     | -0.414 | 0.299 | -1.382 | 0.167 | 0.661 | 0.198 | -1.712 | 0.087 | 0.368 | 1.189 |
| MPPED2    | -0.473 | 0.302 | -1.565 | 0.118 | 0.623 | 0.188 | -2.001 | 0.045 | 0.344 | 1.127 |
| MPPED1    | 0.512  | 0.306 | 1.673  | 0.094 | 1.668 | 0.51  | 1.309  | 0.19  | 0.916 | 3.039 |
| MPPE1     | -0.039 | 0.295 | -0.132 | 0.895 | 0.962 | 0.284 | -0.134 | 0.893 | 0.539 | 1.715 |
| MPP6      | -0.352 | 0.298 | -1.178 | 0.239 | 0.704 | 0.21  | -1.412 | 0.158 | 0.392 | 1.263 |
| MPP5      | 0.056  | 0.295 | 0.19   | 0.85  | 1.058 | 0.312 | 0.184  | 0.854 | 0.593 | 1.887 |
| MPP3      | 0.204  | 0.299 | 0.684  | 0.494 | 1.227 | 0.366 | 0.619  | 0.536 | 0.683 | 2.202 |
| MPP2      | -0.249 | 0.298 | -0.837 | 0.402 | 0.779 | 0.232 | -0.951 | 0.342 | 0.435 | 1.397 |
| MPP1      | -0.241 | 0.298 | -0.808 | 0.419 | 0.786 | 0.234 | -0.913 | 0.361 | 0.439 | 1.409 |
| MPO       | 0.222  | 0.296 | 0.75   | 0.453 | 1.249 | 0.37  | 0.673  | 0.501 | 0.699 | 2.232 |
| MPL       | 0.333  | 0.297 | 1.121  | 0.262 | 1.395 | 0.415 | 0.953  | 0.34  | 0.779 | 2.498 |
| MPIG6B    | 0.096  | 0.295 | 0.327  | 0.744 | 1.101 | 0.325 | 0.311  | 0.756 | 0.617 | 1.964 |
| MPI       | -0.228 | 0.298 | -0.765 | 0.444 | 0.796 | 0.237 | -0.859 | 0.39  | 0.445 | 1.427 |
| MPHOSPH9  | -0.219 | 0.298 | -0.734 | 0.463 | 0.804 | 0.239 | -0.821 | 0.412 | 0.448 | 1.44  |
| MPHOSPH8  | -0.198 | 0.296 | -0.668 | 0.504 | 0.821 | 0.243 | -0.738 | 0.46  | 0.459 | 1.466 |
| MPHOSPH6  | 0.419  | 0.3   | 1.399  | 0.162 | 1.521 | 0.456 | 1.143  | 0.253 | 0.845 | 2.736 |
| MPHOSPH10 | 0.573  | 0.306 | 1.875  | 0.061 | 1.773 | 0.542 | 1.427  | 0.153 | 0.974 | 3.227 |

|         |        |       |        |       |       |       |        |       |       |       |
|---------|--------|-------|--------|-------|-------|-------|--------|-------|-------|-------|
| MPG     | -0.845 | 0.315 | -2.683 | 0.007 | 0.43  | 0.135 | -4.216 | 0     | 0.232 | 0.796 |
| MPDZ    | 0.31   | 0.298 | 1.042  | 0.297 | 1.364 | 0.406 | 0.896  | 0.37  | 0.761 | 2.445 |
| MPDU1   | -0.381 | 0.3   | -1.271 | 0.204 | 0.683 | 0.205 | -1.548 | 0.122 | 0.38  | 1.229 |
| MPC2    | 0.008  | 0.295 | 0.029  | 0.977 | 1.008 | 0.298 | 0.029  | 0.977 | 0.565 | 1.799 |
| MPC1    | 0.263  | 0.297 | 0.885  | 0.376 | 1.301 | 0.386 | 0.778  | 0.437 | 0.727 | 2.328 |
| MOXD1   | -0.791 | 0.311 | -2.541 | 0.011 | 0.453 | 0.141 | -3.874 | 0     | 0.246 | 0.834 |
| MOSPD3  | -0.364 | 0.3   | -1.215 | 0.224 | 0.695 | 0.208 | -1.466 | 0.143 | 0.386 | 1.25  |
| MOSPD2  | -0.086 | 0.295 | -0.291 | 0.771 | 0.918 | 0.271 | -0.303 | 0.762 | 0.514 | 1.637 |
| MOSPD1  | 0.327  | 0.3   | 1.087  | 0.277 | 1.386 | 0.416 | 0.928  | 0.354 | 0.769 | 2.497 |
| MOS     | -0.017 | 0.295 | -0.056 | 0.955 | 0.983 | 0.29  | -0.057 | 0.955 | 0.551 | 1.755 |
| MORN1   | 0.099  | 0.295 | 0.335  | 0.738 | 1.104 | 0.326 | 0.319  | 0.75  | 0.619 | 1.968 |
| MORF4L2 | 0.347  | 0.298 | 1.165  | 0.244 | 1.414 | 0.421 | 0.984  | 0.325 | 0.789 | 2.534 |
| MORF4L1 | 0.34   | 0.3   | 1.135  | 0.257 | 1.405 | 0.421 | 0.962  | 0.336 | 0.781 | 2.527 |
| MORC4   | -0.151 | 0.296 | -0.51  | 0.61  | 0.86  | 0.255 | -0.551 | 0.582 | 0.481 | 1.537 |
| MORC3   | -0.091 | 0.297 | -0.305 | 0.76  | 0.913 | 0.271 | -0.319 | 0.749 | 0.511 | 1.634 |
| MORC2   | 1.169  | 0.336 | 3.48   | 0.001 | 3.22  | 1.082 | 2.052  | 0.04  | 1.667 | 6.221 |
| MORC1   | 0.09   | 0.295 | 0.303  | 0.762 | 1.094 | 0.323 | 0.29   | 0.772 | 0.613 | 1.951 |
| MON2    | -0.297 | 0.296 | -1.004 | 0.315 | 0.743 | 0.22  | -1.169 | 0.242 | 0.415 | 1.328 |
| MON1B   | -0.355 | 0.298 | -1.19  | 0.234 | 0.702 | 0.209 | -1.428 | 0.153 | 0.391 | 1.258 |
| MOK     | -0.76  | 0.31  | -2.453 | 0.014 | 0.468 | 0.145 | -3.675 | 0     | 0.255 | 0.858 |
| MOGS    | 0.217  | 0.296 | 0.732  | 0.464 | 1.242 | 0.368 | 0.658  | 0.51  | 0.695 | 2.218 |
| MOGAT2  | 0.347  | 0.298 | 1.166  | 0.244 | 1.415 | 0.422 | 0.985  | 0.325 | 0.789 | 2.537 |
| MOG     | -0.187 | 0.298 | -0.627 | 0.53  | 0.83  | 0.247 | -0.69  | 0.49  | 0.463 | 1.487 |
| MOCS3   | -0.175 | 0.296 | -0.591 | 0.555 | 0.839 | 0.249 | -0.646 | 0.518 | 0.47  | 1.5   |
| MOCS2   | -0.235 | 0.298 | -0.788 | 0.431 | 0.791 | 0.236 | -0.888 | 0.375 | 0.441 | 1.418 |
| MOCS1   | 0.415  | 0.3   | 1.384  | 0.166 | 1.514 | 0.454 | 1.133  | 0.257 | 0.841 | 2.723 |
| MOCOS   | 0.105  | 0.295 | 0.356  | 0.722 | 1.111 | 0.328 | 0.338  | 0.736 | 0.623 | 1.981 |
| MOBP    | 0.034  | 0.296 | 0.116  | 0.908 | 1.035 | 0.306 | 0.114  | 0.909 | 0.58  | 1.847 |
| MOB4    | 0.319  | 0.298 | 1.071  | 0.284 | 1.375 | 0.409 | 0.917  | 0.359 | 0.768 | 2.464 |
| MOB3B   | 0.032  | 0.296 | 0.107  | 0.915 | 1.032 | 0.305 | 0.105  | 0.916 | 0.578 | 1.843 |
| MOB1A   | -0.131 | 0.295 | -0.443 | 0.657 | 0.877 | 0.259 | -0.474 | 0.636 | 0.492 | 1.565 |
| MOAP1   | -0.174 | 0.296 | -0.585 | 0.558 | 0.841 | 0.249 | -0.639 | 0.523 | 0.47  | 1.503 |
| MNX1    | 0.253  | 0.298 | 0.849  | 0.396 | 1.287 | 0.383 | 0.75   | 0.453 | 0.718 | 2.307 |
| MNT     | -0.178 | 0.296 | -0.602 | 0.547 | 0.837 | 0.248 | -0.659 | 0.51  | 0.468 | 1.496 |
| MNS1    | 0.194  | 0.296 | 0.657  | 0.511 | 1.215 | 0.359 | 0.598  | 0.55  | 0.68  | 2.168 |
| MNDA    | -0.092 | 0.295 | -0.312 | 0.755 | 0.912 | 0.269 | -0.326 | 0.744 | 0.511 | 1.627 |
| MNAT1   | 0.585  | 0.303 | 1.93   | 0.054 | 1.795 | 0.544 | 1.461  | 0.144 | 0.991 | 3.251 |
| MN1     | -0.739 | 0.31  | -2.385 | 0.017 | 0.478 | 0.148 | -3.531 | 0     | 0.26  | 0.877 |

|         |        |       |        |       |       |       |        |       |       |       |
|---------|--------|-------|--------|-------|-------|-------|--------|-------|-------|-------|
| MMUT    | 0.328  | 0.297 | 1.105  | 0.269 | 1.388 | 0.412 | 0.942  | 0.346 | 0.776 | 2.484 |
| MMS19   | 0.137  | 0.296 | 0.462  | 0.644 | 1.146 | 0.339 | 0.432  | 0.666 | 0.642 | 2.046 |
| MMRN2   | -0.352 | 0.298 | -1.182 | 0.237 | 0.703 | 0.209 | -1.416 | 0.157 | 0.392 | 1.261 |
| MMRN1   | -0.054 | 0.295 | -0.184 | 0.854 | 0.947 | 0.279 | -0.189 | 0.85  | 0.531 | 1.689 |
| MMP9    | 0.309  | 0.3   | 1.03   | 0.303 | 1.362 | 0.408 | 0.886  | 0.376 | 0.757 | 2.451 |
| MMP8    | -0.062 | 0.296 | -0.209 | 0.835 | 0.94  | 0.279 | -0.215 | 0.83  | 0.526 | 1.68  |
| MMP7    | 0.025  | 0.298 | 0.083  | 0.934 | 1.025 | 0.305 | 0.082  | 0.935 | 0.572 | 1.837 |
| MMP3    | -0.096 | 0.296 | -0.324 | 0.746 | 0.909 | 0.269 | -0.34  | 0.734 | 0.509 | 1.622 |
| MMP28   | -0.715 | 0.304 | -2.354 | 0.019 | 0.489 | 0.149 | -3.437 | 0.001 | 0.27  | 0.887 |
| MMP27   | -0.179 | 0.296 | -0.605 | 0.545 | 0.836 | 0.248 | -0.662 | 0.508 | 0.468 | 1.494 |
| MMP26   | 0.18   | 0.295 | 0.608  | 0.543 | 1.197 | 0.354 | 0.557  | 0.578 | 0.671 | 2.135 |
| MMP25   | -0.07  | 0.295 | -0.238 | 0.812 | 0.932 | 0.275 | -0.246 | 0.806 | 0.522 | 1.663 |
| MMP24OS | -0.079 | 0.295 | -0.267 | 0.789 | 0.924 | 0.273 | -0.278 | 0.781 | 0.518 | 1.649 |
| MMP24   | -0.054 | 0.295 | -0.184 | 0.854 | 0.947 | 0.28  | -0.189 | 0.85  | 0.531 | 1.689 |
| MMP20   | -0.311 | 0.298 | -1.045 | 0.296 | 0.733 | 0.218 | -1.226 | 0.22  | 0.409 | 1.313 |
| MMP2    | -0.512 | 0.3   | -1.709 | 0.088 | 0.599 | 0.18  | -2.232 | 0.026 | 0.333 | 1.078 |
| MMP19   | -0.508 | 0.302 | -1.679 | 0.093 | 0.602 | 0.182 | -2.188 | 0.029 | 0.333 | 1.089 |
| MMP17   | -0.452 | 0.302 | -1.494 | 0.135 | 0.637 | 0.192 | -1.889 | 0.059 | 0.352 | 1.151 |
| MMP16   | 0.034  | 0.296 | 0.116  | 0.907 | 1.035 | 0.306 | 0.114  | 0.909 | 0.579 | 1.849 |
| MMP15   | 0.073  | 0.297 | 0.246  | 0.806 | 1.076 | 0.319 | 0.237  | 0.813 | 0.601 | 1.924 |
| MMP14   | -0.205 | 0.297 | -0.69  | 0.49  | 0.815 | 0.242 | -0.766 | 0.444 | 0.456 | 1.457 |
| MMP13   | -0.113 | 0.295 | -0.382 | 0.703 | 0.893 | 0.264 | -0.404 | 0.686 | 0.501 | 1.594 |
| MMP12   | 0.489  | 0.303 | 1.615  | 0.106 | 1.63  | 0.493 | 1.278  | 0.201 | 0.901 | 2.95  |
| MMP11   | 0.016  | 0.295 | 0.054  | 0.957 | 1.016 | 0.3   | 0.054  | 0.957 | 0.57  | 1.812 |
| MMP10   | -0.363 | 0.3   | -1.209 | 0.226 | 0.696 | 0.209 | -1.458 | 0.145 | 0.386 | 1.253 |
| MMP1    | 0.415  | 0.3   | 1.386  | 0.166 | 1.515 | 0.454 | 1.134  | 0.257 | 0.842 | 2.726 |
| MME     | -0.171 | 0.296 | -0.579 | 0.563 | 0.843 | 0.249 | -0.631 | 0.528 | 0.472 | 1.505 |
| MMD     | -0.023 | 0.295 | -0.077 | 0.939 | 0.978 | 0.289 | -0.078 | 0.938 | 0.548 | 1.744 |
| MMADHC  | -0.118 | 0.296 | -0.396 | 0.692 | 0.889 | 0.264 | -0.421 | 0.674 | 0.497 | 1.59  |
| MMACHC  | 0.486  | 0.3   | 1.621  | 0.105 | 1.626 | 0.488 | 1.283  | 0.199 | 0.903 | 2.926 |
| MLYCD   | 0.208  | 0.297 | 0.699  | 0.484 | 1.231 | 0.366 | 0.631  | 0.528 | 0.688 | 2.203 |
| MLXIPL  | -0.021 | 0.295 | -0.071 | 0.944 | 0.979 | 0.289 | -0.071 | 0.943 | 0.549 | 1.748 |
| MLXIP   | -0.264 | 0.298 | -0.886 | 0.376 | 0.768 | 0.229 | -1.014 | 0.31  | 0.428 | 1.378 |
| MLX     | 0.317  | 0.298 | 1.065  | 0.287 | 1.373 | 0.409 | 0.913  | 0.361 | 0.766 | 2.46  |
| MLST8   | -0.236 | 0.298 | -0.791 | 0.429 | 0.79  | 0.235 | -0.892 | 0.372 | 0.44  | 1.417 |
| MLPH    | -0.156 | 0.296 | -0.527 | 0.598 | 0.856 | 0.253 | -0.57  | 0.568 | 0.479 | 1.529 |
| MLNR    | 0.198  | 0.296 | 0.67   | 0.503 | 1.219 | 0.361 | 0.608  | 0.543 | 0.682 | 2.179 |
| MLN     | -0.26  | 0.297 | -0.876 | 0.381 | 0.771 | 0.229 | -1     | 0.317 | 0.431 | 1.379 |

|           |        |       |        |       |       |       |        |       |       |       |
|-----------|--------|-------|--------|-------|-------|-------|--------|-------|-------|-------|
| MLLT3     | -0.337 | 0.3   | -1.123 | 0.261 | 0.714 | 0.214 | -1.335 | 0.182 | 0.397 | 1.285 |
| MLLT11    | 0.167  | 0.295 | 0.564  | 0.573 | 1.181 | 0.349 | 0.52   | 0.603 | 0.662 | 2.107 |
| MLLT10    | -0.113 | 0.299 | -0.379 | 0.705 | 0.893 | 0.267 | -0.401 | 0.688 | 0.497 | 1.603 |
| MLLT1     | -0.388 | 0.3   | -1.295 | 0.195 | 0.678 | 0.203 | -1.582 | 0.114 | 0.377 | 1.221 |
| MLH3      | -0.079 | 0.296 | -0.268 | 0.789 | 0.924 | 0.274 | -0.279 | 0.78  | 0.517 | 1.651 |
| MLH1      | -0.129 | 0.296 | -0.435 | 0.663 | 0.879 | 0.26  | -0.465 | 0.642 | 0.492 | 1.571 |
| MLF2      | 0.112  | 0.295 | 0.379  | 0.705 | 1.118 | 0.33  | 0.358  | 0.72  | 0.627 | 1.994 |
| MLF1      | 0.359  | 0.298 | 1.207  | 0.228 | 1.432 | 0.427 | 1.014  | 0.311 | 0.799 | 2.568 |
| MLEC      | -0.591 | 0.303 | -1.948 | 0.051 | 0.554 | 0.168 | -2.655 | 0.008 | 0.306 | 1.004 |
| MLC1      | 0.076  | 0.295 | 0.256  | 0.798 | 1.079 | 0.319 | 0.247  | 0.805 | 0.605 | 1.925 |
| MLANA     | -0.624 | 0.306 | -2.037 | 0.042 | 0.536 | 0.164 | -2.827 | 0.005 | 0.294 | 0.977 |
| MKS1      | -0.033 | 0.296 | -0.111 | 0.911 | 0.968 | 0.286 | -0.113 | 0.91  | 0.542 | 1.729 |
| MKRN7P    | 0.02   | 0.295 | 0.067  | 0.946 | 1.02  | 0.301 | 0.067  | 0.947 | 0.572 | 1.818 |
| MKRN3     | -0.377 | 0.299 | -1.262 | 0.207 | 0.686 | 0.205 | -1.533 | 0.125 | 0.381 | 1.232 |
| MKRN2     | -0.18  | 0.296 | -0.607 | 0.544 | 0.836 | 0.248 | -0.664 | 0.506 | 0.468 | 1.493 |
| MKRN1     | -0.499 | 0.301 | -1.657 | 0.098 | 0.607 | 0.183 | -2.149 | 0.032 | 0.337 | 1.096 |
| MKNK2     | -0.478 | 0.303 | -1.578 | 0.115 | 0.62  | 0.188 | -2.022 | 0.043 | 0.343 | 1.123 |
| MKNK1     | -0.548 | 0.302 | -1.816 | 0.069 | 0.578 | 0.174 | -2.418 | 0.016 | 0.32  | 1.044 |
| MKLN1     | -0.271 | 0.3   | -0.904 | 0.366 | 0.763 | 0.229 | -1.038 | 0.299 | 0.424 | 1.373 |
| MKKS      | 0.021  | 0.295 | 0.073  | 0.942 | 1.022 | 0.301 | 0.072  | 0.943 | 0.573 | 1.822 |
| MKI67     | 0.742  | 0.31  | 2.393  | 0.017 | 2.1   | 0.651 | 1.69   | 0.091 | 1.144 | 3.855 |
| MITF      | -0.232 | 0.296 | -0.784 | 0.433 | 0.793 | 0.235 | -0.882 | 0.378 | 0.444 | 1.417 |
| MISP      | -0.157 | 0.295 | -0.53  | 0.596 | 0.855 | 0.253 | -0.574 | 0.566 | 0.479 | 1.526 |
| MIS18BP1  | 0.999  | 0.321 | 3.113  | 0.002 | 2.716 | 0.872 | 1.969  | 0.049 | 1.448 | 5.096 |
| MIS18A    | 1.099  | 0.328 | 3.349  | 0.001 | 3.002 | 0.985 | 2.032  | 0.042 | 1.578 | 5.712 |
| MIS12     | 0.358  | 0.298 | 1.201  | 0.23  | 1.431 | 0.426 | 1.01   | 0.313 | 0.798 | 2.565 |
| MIR9-1HG  | 0.152  | 0.298 | 0.509  | 0.611 | 1.164 | 0.347 | 0.472  | 0.637 | 0.649 | 2.089 |
| MIR622    | 0.239  | 0.296 | 0.807  | 0.419 | 1.27  | 0.377 | 0.718  | 0.473 | 0.711 | 2.271 |
| MIR3916   | -0.221 | 0.298 | -0.741 | 0.458 | 0.802 | 0.239 | -0.83  | 0.407 | 0.447 | 1.438 |
| MIR1244-3 | -0.008 | 0.296 | -0.028 | 0.978 | 0.992 | 0.294 | -0.028 | 0.977 | 0.555 | 1.772 |
| MIPEP     | 0.032  | 0.296 | 0.109  | 0.913 | 1.033 | 0.305 | 0.108  | 0.914 | 0.579 | 1.844 |
| MIP       | -0.071 | 0.295 | -0.242 | 0.809 | 0.931 | 0.275 | -0.25  | 0.802 | 0.522 | 1.661 |
| MIOS      | 0.427  | 0.3   | 1.423  | 0.155 | 1.532 | 0.459 | 1.158  | 0.247 | 0.851 | 2.758 |
| MINPP1    | 0.453  | 0.299 | 1.515  | 0.13  | 1.573 | 0.47  | 1.218  | 0.223 | 0.875 | 2.826 |
| MINK1     | 0.15   | 0.296 | 0.506  | 0.613 | 1.161 | 0.344 | 0.47   | 0.639 | 0.65  | 2.074 |
| MINDY3    | 0.05   | 0.296 | 0.169  | 0.866 | 1.051 | 0.311 | 0.165  | 0.869 | 0.589 | 1.877 |
| MINDY2    | -0.968 | 0.328 | -2.95  | 0.003 | 0.38  | 0.125 | -4.975 | 0     | 0.2   | 0.723 |
| MINDY1    | 0.095  | 0.295 | 0.323  | 0.747 | 1.1   | 0.325 | 0.308  | 0.758 | 0.616 | 1.963 |

|           |        |       |        |       |       |       |        |       |       |       |
|-----------|--------|-------|--------|-------|-------|-------|--------|-------|-------|-------|
| MINAR1    | -0.215 | 0.296 | -0.726 | 0.468 | 0.807 | 0.239 | -0.81  | 0.418 | 0.452 | 1.441 |
| MILR1     | 0.387  | 0.298 | 1.301  | 0.193 | 1.473 | 0.439 | 1.078  | 0.281 | 0.822 | 2.642 |
| MIIP      | -0.827 | 0.311 | -2.658 | 0.008 | 0.437 | 0.136 | -4.135 | 0     | 0.237 | 0.805 |
| MIF       | 0.166  | 0.295 | 0.562  | 0.574 | 1.181 | 0.349 | 0.518  | 0.604 | 0.662 | 2.106 |
| MIER2     | 0.449  | 0.302 | 1.485  | 0.137 | 1.567 | 0.473 | 1.197  | 0.231 | 0.866 | 2.832 |
| MIEF1     | 0.394  | 0.3   | 1.315  | 0.188 | 1.483 | 0.445 | 1.087  | 0.277 | 0.824 | 2.669 |
| MID2      | 0.111  | 0.296 | 0.374  | 0.709 | 1.117 | 0.331 | 0.354  | 0.724 | 0.625 | 1.995 |
| MID1IP1   | -0.493 | 0.302 | -1.633 | 0.103 | 0.61  | 0.185 | -2.111 | 0.035 | 0.338 | 1.104 |
| MID1      | 0.01   | 0.299 | 0.035  | 0.972 | 1.01  | 0.302 | 0.035  | 0.972 | 0.562 | 1.817 |
| MICU2     | 0.588  | 0.304 | 1.933  | 0.053 | 1.8   | 0.547 | 1.462  | 0.144 | 0.992 | 3.267 |
| MICU1     | -0.171 | 0.296 | -0.578 | 0.563 | 0.843 | 0.25  | -0.63  | 0.529 | 0.471 | 1.506 |
| MICOS10P1 | 0.306  | 0.3   | 1.021  | 0.307 | 1.359 | 0.408 | 0.88   | 0.379 | 0.755 | 2.446 |
| MICB      | 0.664  | 0.306 | 2.166  | 0.03  | 1.942 | 0.595 | 1.583  | 0.113 | 1.065 | 3.54  |
| MICALL2   | -0.018 | 0.295 | -0.062 | 0.95  | 0.982 | 0.29  | -0.063 | 0.95  | 0.551 | 1.75  |
| MICALL1   | 0.869  | 0.321 | 2.709  | 0.007 | 2.384 | 0.765 | 1.81   | 0.07  | 1.272 | 4.471 |
| MICAL3    | -0.083 | 0.296 | -0.282 | 0.778 | 0.92  | 0.272 | -0.294 | 0.769 | 0.515 | 1.642 |
| MICAL2    | 0.051  | 0.296 | 0.172  | 0.864 | 1.052 | 0.311 | 0.168  | 0.867 | 0.589 | 1.878 |
| MICAL1    | 0.161  | 0.296 | 0.543  | 0.587 | 1.175 | 0.348 | 0.502  | 0.616 | 0.657 | 2.099 |
| MICA      | 0.409  | 0.298 | 1.37   | 0.171 | 1.505 | 0.449 | 1.124  | 0.261 | 0.839 | 2.701 |
| MIA3      | -0.322 | 0.298 | -1.08  | 0.28  | 0.725 | 0.216 | -1.273 | 0.203 | 0.404 | 1.3   |
| MIA2      | 0.418  | 0.299 | 1.399  | 0.162 | 1.52  | 0.455 | 1.143  | 0.253 | 0.845 | 2.731 |
| MIA       | -0.154 | 0.296 | -0.522 | 0.602 | 0.857 | 0.254 | -0.564 | 0.573 | 0.48  | 1.531 |
| MGST3     | 0.599  | 0.302 | 1.986  | 0.047 | 1.82  | 0.549 | 1.494  | 0.135 | 1.008 | 3.289 |
| MGST2     | -0.103 | 0.296 | -0.347 | 0.728 | 0.902 | 0.267 | -0.366 | 0.714 | 0.505 | 1.613 |
| MGRN1     | -0.309 | 0.296 | -1.044 | 0.296 | 0.734 | 0.217 | -1.224 | 0.221 | 0.411 | 1.312 |
| MGP       | 0.146  | 0.296 | 0.495  | 0.621 | 1.158 | 0.342 | 0.461  | 0.645 | 0.649 | 2.066 |
| MGMT      | 0.231  | 0.296 | 0.78   | 0.435 | 1.26  | 0.373 | 0.696  | 0.486 | 0.705 | 2.252 |
| MGLL      | 0.116  | 0.295 | 0.392  | 0.695 | 1.123 | 0.332 | 0.37   | 0.711 | 0.629 | 2.003 |
| MGC4859   | 0.293  | 0.297 | 0.986  | 0.324 | 1.34  | 0.398 | 0.855  | 0.393 | 0.749 | 2.398 |
| MGC2889   | 0.256  | 0.296 | 0.866  | 0.387 | 1.292 | 0.383 | 0.763  | 0.445 | 0.723 | 2.31  |
| MGAT5     | 0.248  | 0.298 | 0.834  | 0.404 | 1.282 | 0.382 | 0.738  | 0.46  | 0.715 | 2.297 |
| MGAT4C    | 0.473  | 0.3   | 1.579  | 0.114 | 1.605 | 0.481 | 1.258  | 0.208 | 0.892 | 2.887 |
| MGAT4B    | -0.222 | 0.298 | -0.746 | 0.456 | 0.801 | 0.239 | -0.836 | 0.403 | 0.446 | 1.436 |
| MGAT4A    | 0.293  | 0.296 | 0.987  | 0.324 | 1.34  | 0.397 | 0.856  | 0.392 | 0.749 | 2.395 |
| MGAT3     | -0.457 | 0.302 | -1.513 | 0.13  | 0.633 | 0.191 | -1.919 | 0.055 | 0.35  | 1.145 |
| MGAT2     | -0.152 | 0.295 | -0.513 | 0.608 | 0.859 | 0.254 | -0.554 | 0.579 | 0.482 | 1.533 |
| MGAT1     | -0.283 | 0.298 | -0.951 | 0.341 | 0.753 | 0.224 | -1.1   | 0.271 | 0.42  | 1.35  |
| MGAM2     | 0.104  | 0.296 | 0.351  | 0.725 | 1.109 | 0.328 | 0.334  | 0.739 | 0.622 | 1.98  |

|         |        |       |        |       |       |       |        |       |       |       |
|---------|--------|-------|--------|-------|-------|-------|--------|-------|-------|-------|
| MGAM    | -0.371 | 0.3   | -1.239 | 0.215 | 0.69  | 0.207 | -1.5   | 0.134 | 0.383 | 1.241 |
| MGA     | -0.154 | 0.296 | -0.52  | 0.603 | 0.857 | 0.254 | -0.562 | 0.574 | 0.48  | 1.532 |
| MFSD9   | -0.001 | 0.295 | -0.005 | 0.996 | 0.999 | 0.295 | -0.005 | 0.996 | 0.56  | 1.78  |
| MFSD6   | -0.031 | 0.297 | -0.105 | 0.916 | 0.969 | 0.288 | -0.107 | 0.915 | 0.542 | 1.734 |
| MFSD5   | -0.567 | 0.306 | -1.856 | 0.064 | 0.567 | 0.173 | -2.497 | 0.013 | 0.312 | 1.032 |
| MFSD13A | 0.622  | 0.303 | 2.053  | 0.04  | 1.862 | 0.564 | 1.529  | 0.126 | 1.029 | 3.37  |
| MFSD12  | 0.11   | 0.296 | 0.371  | 0.71  | 1.116 | 0.33  | 0.352  | 0.725 | 0.625 | 1.994 |
| MFSD11  | -0.11  | 0.295 | -0.371 | 0.711 | 0.896 | 0.265 | -0.392 | 0.695 | 0.502 | 1.599 |
| MFSD10  | 0.05   | 0.296 | 0.17   | 0.865 | 1.051 | 0.311 | 0.166  | 0.869 | 0.589 | 1.877 |
| MFSD1   | 0.062  | 0.295 | 0.21   | 0.833 | 1.064 | 0.314 | 0.204  | 0.838 | 0.596 | 1.899 |
| MFNG    | -0.656 | 0.306 | -2.144 | 0.032 | 0.519 | 0.159 | -3.03  | 0.002 | 0.285 | 0.945 |
| MFN2    | -0.3   | 0.301 | -0.999 | 0.318 | 0.741 | 0.223 | -1.166 | 0.244 | 0.411 | 1.335 |
| MFN1    | 0.41   | 0.3   | 1.369  | 0.171 | 1.507 | 0.452 | 1.123  | 0.261 | 0.838 | 2.711 |
| MFHAS1  | 0.42   | 0.299 | 1.403  | 0.161 | 1.521 | 0.455 | 1.146  | 0.252 | 0.847 | 2.733 |
| MFGE8   | -0.175 | 0.296 | -0.59  | 0.555 | 0.84  | 0.249 | -0.644 | 0.519 | 0.47  | 1.501 |
| MFF     | -0.54  | 0.301 | -1.795 | 0.073 | 0.583 | 0.175 | -2.38  | 0.017 | 0.323 | 1.051 |
| MFAP5   | -0.606 | 0.306 | -1.983 | 0.047 | 0.546 | 0.167 | -2.725 | 0.006 | 0.3   | 0.993 |
| MFAP4   | -0.817 | 0.31  | -2.636 | 0.008 | 0.442 | 0.137 | -4.078 | 0     | 0.241 | 0.811 |
| MFAP3L  | 0.342  | 0.3   | 1.137  | 0.255 | 1.407 | 0.423 | 0.963  | 0.335 | 0.781 | 2.536 |
| MFAP3   | -0.423 | 0.3   | -1.412 | 0.158 | 0.655 | 0.196 | -1.757 | 0.079 | 0.364 | 1.179 |
| MFAP2   | -0.251 | 0.296 | -0.848 | 0.396 | 0.778 | 0.23  | -0.964 | 0.335 | 0.435 | 1.39  |
| MFAP1   | 0.143  | 0.295 | 0.483  | 0.629 | 1.153 | 0.341 | 0.45   | 0.653 | 0.646 | 2.058 |
| MEX3D   | -0.689 | 0.31  | -2.227 | 0.026 | 0.502 | 0.155 | -3.206 | 0.001 | 0.274 | 0.921 |
| MEX3C   | 0.053  | 0.295 | 0.179  | 0.858 | 1.054 | 0.311 | 0.174  | 0.862 | 0.591 | 1.88  |
| METTL9  | 0.224  | 0.298 | 0.752  | 0.452 | 1.251 | 0.372 | 0.674  | 0.5   | 0.698 | 2.242 |
| METTL8  | -0.12  | 0.297 | -0.403 | 0.687 | 0.887 | 0.263 | -0.428 | 0.668 | 0.496 | 1.587 |
| METTL7A | -0.159 | 0.296 | -0.536 | 0.592 | 0.853 | 0.253 | -0.581 | 0.561 | 0.477 | 1.525 |
| METTL5  | 0.426  | 0.299 | 1.424  | 0.154 | 1.531 | 0.457 | 1.16   | 0.246 | 0.852 | 2.75  |
| METTL4  | 0.219  | 0.296 | 0.739  | 0.46  | 1.245 | 0.369 | 0.664  | 0.507 | 0.696 | 2.225 |
| METTL3  | -0.188 | 0.296 | -0.636 | 0.525 | 0.828 | 0.245 | -0.699 | 0.484 | 0.463 | 1.48  |
| METTL2B | 0.185  | 0.296 | 0.627  | 0.531 | 1.204 | 0.356 | 0.572  | 0.567 | 0.674 | 2.148 |
| METTL22 | 0.509  | 0.306 | 1.664  | 0.096 | 1.663 | 0.508 | 1.304  | 0.192 | 0.914 | 3.028 |
| METTL18 | -0.189 | 0.298 | -0.635 | 0.526 | 0.828 | 0.246 | -0.699 | 0.485 | 0.462 | 1.484 |
| METTL17 | 0.168  | 0.295 | 0.567  | 0.571 | 1.182 | 0.349 | 0.522  | 0.602 | 0.663 | 2.109 |
| METTL1  | 0.197  | 0.299 | 0.658  | 0.51  | 1.217 | 0.363 | 0.598  | 0.55  | 0.678 | 2.185 |
| METRNL  | 0.286  | 0.298 | 0.961  | 0.337 | 1.331 | 0.397 | 0.835  | 0.403 | 0.743 | 2.387 |
| METAP2  | -0.073 | 0.297 | -0.245 | 0.807 | 0.93  | 0.276 | -0.254 | 0.8   | 0.52  | 1.663 |
| METAP1  | 0.151  | 0.297 | 0.509  | 0.611 | 1.163 | 0.346 | 0.472  | 0.637 | 0.65  | 2.082 |

|         |        |       |        |       |       |       |        |       |       |       |
|---------|--------|-------|--------|-------|-------|-------|--------|-------|-------|-------|
| MET     | -0.682 | 0.305 | -2.235 | 0.025 | 0.505 | 0.154 | -3.206 | 0.001 | 0.278 | 0.919 |
| MEST    | -0.327 | 0.3   | -1.09  | 0.276 | 0.721 | 0.216 | -1.289 | 0.197 | 0.401 | 1.298 |
| MERTK   | -0.131 | 0.296 | -0.444 | 0.657 | 0.877 | 0.259 | -0.475 | 0.635 | 0.491 | 1.566 |
| MEPE    | 0.149  | 0.296 | 0.502  | 0.616 | 1.16  | 0.344 | 0.466  | 0.641 | 0.649 | 2.074 |
| MEPCE   | -0.248 | 0.298 | -0.834 | 0.404 | 0.78  | 0.232 | -0.946 | 0.344 | 0.435 | 1.399 |
| MEP1B   | -0.264 | 0.296 | -0.891 | 0.373 | 0.768 | 0.228 | -1.019 | 0.308 | 0.429 | 1.373 |
| MEP1A   | 0.426  | 0.3   | 1.418  | 0.156 | 1.53  | 0.459 | 1.155  | 0.248 | 0.85  | 2.756 |
| MEOX2   | -0.26  | 0.296 | -0.879 | 0.379 | 0.771 | 0.228 | -1.004 | 0.315 | 0.431 | 1.377 |
| MEOX1   | -0.184 | 0.296 | -0.624 | 0.532 | 0.832 | 0.246 | -0.685 | 0.493 | 0.466 | 1.484 |
| MEN1    | 0.344  | 0.3   | 1.149  | 0.251 | 1.411 | 0.423 | 0.972  | 0.331 | 0.784 | 2.538 |
| MELTF   | -0.28  | 0.297 | -0.942 | 0.346 | 0.756 | 0.224 | -1.087 | 0.277 | 0.422 | 1.353 |
| MELK    | 0.511  | 0.3   | 1.703  | 0.089 | 1.666 | 0.5   | 1.333  | 0.182 | 0.926 | 2.999 |
| MEIS3P1 | -0.267 | 0.3   | -0.89  | 0.374 | 0.765 | 0.23  | -1.02  | 0.308 | 0.425 | 1.379 |
| MEIS2   | -0.263 | 0.296 | -0.887 | 0.375 | 0.769 | 0.228 | -1.014 | 0.311 | 0.43  | 1.375 |
| MEIS1   | -0.631 | 0.306 | -2.063 | 0.039 | 0.532 | 0.163 | -2.875 | 0.004 | 0.292 | 0.969 |
| MEGF9   | -0.437 | 0.3   | -1.458 | 0.145 | 0.646 | 0.194 | -1.829 | 0.067 | 0.359 | 1.162 |
| MEGF8   | 0.433  | 0.299 | 1.447  | 0.148 | 1.541 | 0.461 | 1.175  | 0.24  | 0.858 | 2.769 |
| MEGF6   | -0.173 | 0.296 | -0.583 | 0.56  | 0.841 | 0.249 | -0.636 | 0.525 | 0.471 | 1.504 |
| MEG3    | -0.265 | 0.297 | -0.89  | 0.374 | 0.768 | 0.228 | -1.019 | 0.308 | 0.429 | 1.375 |
| MEFV    | -0.164 | 0.296 | -0.553 | 0.58  | 0.849 | 0.251 | -0.601 | 0.548 | 0.475 | 1.517 |
| MEF2D   | -0.073 | 0.295 | -0.246 | 0.806 | 0.93  | 0.275 | -0.255 | 0.799 | 0.521 | 1.659 |
| MEF2C   | -0.959 | 0.316 | -3.031 | 0.002 | 0.383 | 0.121 | -5.086 | 0     | 0.206 | 0.713 |
| MEF2A   | 0.117  | 0.295 | 0.398  | 0.691 | 1.125 | 0.332 | 0.375  | 0.708 | 0.63  | 2.006 |
| MED9    | 0.498  | 0.3   | 1.66   | 0.097 | 1.645 | 0.493 | 1.308  | 0.191 | 0.914 | 2.959 |
| MED8    | -0.041 | 0.297 | -0.139 | 0.89  | 0.96  | 0.285 | -0.141 | 0.888 | 0.536 | 1.718 |
| MED7    | 0.237  | 0.296 | 0.801  | 0.423 | 1.268 | 0.375 | 0.713  | 0.476 | 0.709 | 2.265 |
| MED6    | -0.09  | 0.297 | -0.302 | 0.763 | 0.914 | 0.271 | -0.316 | 0.752 | 0.511 | 1.636 |
| MED4    | 0.293  | 0.297 | 0.988  | 0.323 | 1.341 | 0.398 | 0.856  | 0.392 | 0.749 | 2.398 |
| MED31   | 0.22   | 0.296 | 0.744  | 0.457 | 1.246 | 0.368 | 0.668  | 0.504 | 0.698 | 2.225 |
| MED28   | -0.377 | 0.298 | -1.264 | 0.206 | 0.686 | 0.204 | -1.535 | 0.125 | 0.383 | 1.231 |
| MED27   | 0.89   | 0.311 | 2.859  | 0.004 | 2.436 | 0.759 | 1.893  | 0.058 | 1.323 | 4.485 |
| MED25   | -0.439 | 0.302 | -1.453 | 0.146 | 0.644 | 0.195 | -1.824 | 0.068 | 0.356 | 1.166 |
| MED24   | 0.321  | 0.297 | 1.082  | 0.279 | 1.379 | 0.41  | 0.926  | 0.355 | 0.771 | 2.468 |
| MED23   | -0.414 | 0.3   | -1.382 | 0.167 | 0.661 | 0.198 | -1.712 | 0.087 | 0.367 | 1.189 |
| MED22   | 0.339  | 0.298 | 1.136  | 0.256 | 1.403 | 0.418 | 0.964  | 0.335 | 0.782 | 2.516 |
| MED20   | 0.172  | 0.295 | 0.582  | 0.561 | 1.188 | 0.351 | 0.535  | 0.593 | 0.666 | 2.119 |
| MED18   | 0.189  | 0.296 | 0.638  | 0.524 | 1.208 | 0.357 | 0.581  | 0.561 | 0.676 | 2.156 |
| MED17   | -0.187 | 0.298 | -0.629 | 0.529 | 0.829 | 0.247 | -0.692 | 0.489 | 0.463 | 1.486 |



|        |        |       |        |       |       |       |        |       |       |       |
|--------|--------|-------|--------|-------|-------|-------|--------|-------|-------|-------|
| MED16  | 0.251  | 0.296 | 0.846  | 0.397 | 1.285 | 0.381 | 0.748  | 0.454 | 0.719 | 2.298 |
| MED15  | 0.197  | 0.296 | 0.664  | 0.507 | 1.217 | 0.361 | 0.603  | 0.547 | 0.681 | 2.175 |
| MED14  | 0.528  | 0.302 | 1.745  | 0.081 | 1.695 | 0.512 | 1.356  | 0.175 | 0.937 | 3.065 |
| MED13L | -0.354 | 0.3   | -1.18  | 0.238 | 0.702 | 0.211 | -1.416 | 0.157 | 0.39  | 1.264 |
| MED13  | -0.254 | 0.296 | -0.857 | 0.391 | 0.776 | 0.23  | -0.976 | 0.329 | 0.434 | 1.386 |
| MED12  | -0.196 | 0.296 | -0.661 | 0.509 | 0.822 | 0.243 | -0.73  | 0.465 | 0.461 | 1.469 |
| MED1   | 0.719  | 0.31  | 2.319  | 0.02  | 2.052 | 0.636 | 1.654  | 0.098 | 1.118 | 3.767 |
| MECR   | 0.501  | 0.3   | 1.672  | 0.095 | 1.651 | 0.495 | 1.315  | 0.189 | 0.917 | 2.972 |
| MECP2  | 0.912  | 0.317 | 2.878  | 0.004 | 2.489 | 0.789 | 1.888  | 0.059 | 1.338 | 4.632 |
| MECOM  | -0.072 | 0.295 | -0.244 | 0.807 | 0.93  | 0.275 | -0.253 | 0.8   | 0.522 | 1.66  |
| MEAK7  | 0.176  | 0.298 | 0.59   | 0.555 | 1.192 | 0.355 | 0.541  | 0.588 | 0.665 | 2.139 |
| MEAF6  | 0.039  | 0.296 | 0.132  | 0.895 | 1.04  | 0.308 | 0.129  | 0.897 | 0.582 | 1.858 |
| MEA1   | 0.318  | 0.298 | 1.065  | 0.287 | 1.374 | 0.41  | 0.913  | 0.361 | 0.766 | 2.466 |
| ME3    | -0.187 | 0.297 | -0.63  | 0.528 | 0.829 | 0.246 | -0.693 | 0.488 | 0.463 | 1.484 |
| ME2    | 0.506  | 0.298 | 1.697  | 0.09  | 1.659 | 0.495 | 1.332  | 0.183 | 0.925 | 2.977 |
| ME1    | 0.423  | 0.3   | 1.41   | 0.159 | 1.526 | 0.458 | 1.15   | 0.25  | 0.848 | 2.748 |
| MDN1   | -0.037 | 0.297 | -0.125 | 0.901 | 0.964 | 0.286 | -0.127 | 0.899 | 0.539 | 1.724 |
| MDM4   | 0.611  | 0.306 | 1.998  | 0.046 | 1.843 | 0.564 | 1.495  | 0.135 | 1.012 | 3.357 |
| MDM2   | 0.242  | 0.297 | 0.813  | 0.416 | 1.274 | 0.379 | 0.722  | 0.47  | 0.711 | 2.282 |
| MDM1   | -0.286 | 0.298 | -0.961 | 0.337 | 0.751 | 0.224 | -1.112 | 0.266 | 0.419 | 1.347 |
| MDK    | 0.147  | 0.295 | 0.496  | 0.62  | 1.158 | 0.342 | 0.462  | 0.644 | 0.649 | 2.066 |
| MDH2   | 0.348  | 0.3   | 1.163  | 0.245 | 1.417 | 0.425 | 0.982  | 0.326 | 0.787 | 2.549 |
| MDH1   | 0.698  | 0.305 | 2.287  | 0.022 | 2.009 | 0.613 | 1.647  | 0.1   | 1.105 | 3.652 |
| MDFIC  | -0.634 | 0.306 | -2.073 | 0.038 | 0.531 | 0.162 | -2.894 | 0.004 | 0.291 | 0.966 |
| MDFI   | 0.492  | 0.301 | 1.633  | 0.102 | 1.635 | 0.492 | 1.29   | 0.197 | 0.906 | 2.95  |
| MDC1   | 0.701  | 0.306 | 2.294  | 0.022 | 2.016 | 0.616 | 1.649  | 0.099 | 1.108 | 3.67  |
| MCUR1  | 0.366  | 0.298 | 1.228  | 0.219 | 1.442 | 0.429 | 1.029  | 0.304 | 0.804 | 2.584 |
| MCUB   | 0.13   | 0.295 | 0.441  | 0.66  | 1.139 | 0.336 | 0.413  | 0.68  | 0.639 | 2.031 |
| MCTS1  | 0.724  | 0.307 | 2.361  | 0.018 | 2.063 | 0.633 | 1.68   | 0.093 | 1.131 | 3.763 |
| MCTP2  | 0.377  | 0.303 | 1.243  | 0.214 | 1.458 | 0.442 | 1.036  | 0.3   | 0.805 | 2.642 |
| MCTP1  | -0.34  | 0.298 | -1.141 | 0.254 | 0.712 | 0.212 | -1.358 | 0.174 | 0.397 | 1.276 |
| MCRS1  | -0.482 | 0.303 | -1.594 | 0.111 | 0.617 | 0.187 | -2.048 | 0.041 | 0.341 | 1.117 |
| MCPH1  | -0.243 | 0.3   | -0.812 | 0.417 | 0.784 | 0.235 | -0.919 | 0.358 | 0.436 | 1.411 |
| MCOLN3 | -0.112 | 0.296 | -0.38  | 0.704 | 0.894 | 0.265 | -0.402 | 0.688 | 0.5   | 1.597 |
| MCOLN1 | 0.09   | 0.296 | 0.303  | 0.762 | 1.094 | 0.324 | 0.29   | 0.772 | 0.612 | 1.955 |
| MCMBP  | -0.321 | 0.299 | -1.074 | 0.283 | 0.725 | 0.217 | -1.267 | 0.205 | 0.404 | 1.303 |
| MCM9   | 0.057  | 0.296 | 0.193  | 0.847 | 1.059 | 0.313 | 0.188  | 0.851 | 0.593 | 1.89  |
| MCM7   | 0.453  | 0.3   | 1.512  | 0.131 | 1.573 | 0.471 | 1.216  | 0.224 | 0.874 | 2.83  |

|            |        |       |        |       |       |       |        |       |       |       |
|------------|--------|-------|--------|-------|-------|-------|--------|-------|-------|-------|
| MCM6       | 0.784  | 0.315 | 2.491  | 0.013 | 2.19  | 0.689 | 1.726  | 0.084 | 1.182 | 4.058 |
| MCM5       | 0.717  | 0.31  | 2.314  | 0.021 | 2.047 | 0.634 | 1.652  | 0.099 | 1.116 | 3.757 |
| MCM4       | 0.194  | 0.297 | 0.654  | 0.513 | 1.214 | 0.361 | 0.594  | 0.552 | 0.678 | 2.173 |
| MCM3AP-AS1 | 0.468  | 0.302 | 1.55   | 0.121 | 1.597 | 0.483 | 1.238  | 0.216 | 0.883 | 2.889 |
| MCM3AP     | -0.25  | 0.298 | -0.841 | 0.401 | 0.779 | 0.232 | -0.955 | 0.339 | 0.435 | 1.395 |
| MCM3       | 0.261  | 0.296 | 0.881  | 0.378 | 1.298 | 0.384 | 0.775  | 0.438 | 0.726 | 2.32  |
| MCM2       | 0.641  | 0.306 | 2.097  | 0.036 | 1.899 | 0.581 | 1.548  | 0.122 | 1.043 | 3.457 |
| MCM10      | 0.673  | 0.306 | 2.201  | 0.028 | 1.959 | 0.599 | 1.602  | 0.109 | 1.076 | 3.567 |
| MCL1       | -0.6   | 0.303 | -1.978 | 0.048 | 0.549 | 0.166 | -2.711 | 0.007 | 0.303 | 0.994 |
| MCHR1      | -0.441 | 0.302 | -1.461 | 0.144 | 0.644 | 0.194 | -1.836 | 0.066 | 0.356 | 1.163 |
| MCFD2      | -0.11  | 0.297 | -0.37  | 0.711 | 0.896 | 0.266 | -0.391 | 0.696 | 0.5   | 1.604 |
| MCF2L2     | -0.055 | 0.296 | -0.186 | 0.853 | 0.947 | 0.28  | -0.191 | 0.848 | 0.53  | 1.689 |
| MCF2L-AS1  | 0.584  | 0.303 | 1.929  | 0.054 | 1.794 | 0.543 | 1.461  | 0.144 | 0.991 | 3.247 |
| MCF2L      | 0.297  | 0.298 | 0.996  | 0.319 | 1.346 | 0.402 | 0.862  | 0.389 | 0.75  | 2.416 |
| MCF2       | 0.506  | 0.303 | 1.668  | 0.095 | 1.658 | 0.502 | 1.309  | 0.19  | 0.915 | 3.003 |
| MCCC2      | -0.546 | 0.306 | -1.788 | 0.074 | 0.579 | 0.177 | -2.38  | 0.017 | 0.318 | 1.054 |
| MCCC1      | 0.477  | 0.302 | 1.578  | 0.114 | 1.611 | 0.487 | 1.255  | 0.209 | 0.891 | 2.914 |
| MCC        | -0.245 | 0.298 | -0.823 | 0.41  | 0.783 | 0.233 | -0.933 | 0.351 | 0.437 | 1.402 |
| MCAT       | -0.026 | 0.295 | -0.089 | 0.929 | 0.974 | 0.288 | -0.09  | 0.928 | 0.546 | 1.738 |
| MCAM       | 0.155  | 0.296 | 0.522  | 0.602 | 1.167 | 0.346 | 0.484  | 0.629 | 0.653 | 2.085 |
| MC5R       | -0.158 | 0.297 | -0.532 | 0.595 | 0.854 | 0.254 | -0.576 | 0.565 | 0.477 | 1.529 |
| MC4R       | 0.405  | 0.298 | 1.36   | 0.174 | 1.499 | 0.446 | 1.118  | 0.264 | 0.836 | 2.687 |
| MC3R       | -0.021 | 0.296 | -0.072 | 0.943 | 0.979 | 0.289 | -0.072 | 0.942 | 0.549 | 1.747 |
| MC2R       | 0.266  | 0.298 | 0.895  | 0.371 | 1.305 | 0.388 | 0.785  | 0.432 | 0.728 | 2.338 |
| MC1R       | 0.514  | 0.3   | 1.71   | 0.087 | 1.672 | 0.502 | 1.337  | 0.181 | 0.928 | 3.013 |
| MBTPS2     | -0.719 | 0.315 | -2.284 | 0.022 | 0.487 | 0.153 | -3.343 | 0.001 | 0.263 | 0.903 |
| MBTPS1     | -0.295 | 0.297 | -0.991 | 0.322 | 0.745 | 0.222 | -1.153 | 0.249 | 0.416 | 1.334 |
| MBTD1      | -0.277 | 0.297 | -0.934 | 0.35  | 0.758 | 0.225 | -1.076 | 0.282 | 0.424 | 1.356 |
| MBP        | 0.761  | 0.31  | 2.454  | 0.014 | 2.14  | 0.664 | 1.718  | 0.086 | 1.166 | 3.93  |
| MBOAT7     | -0.138 | 0.299 | -0.463 | 0.643 | 0.871 | 0.26  | -0.497 | 0.619 | 0.485 | 1.565 |
| MBOAT2     | 0.226  | 0.297 | 0.759  | 0.448 | 1.253 | 0.373 | 0.68   | 0.497 | 0.7   | 2.246 |
| MBNL3      | 0.002  | 0.295 | 0.007  | 0.995 | 1.002 | 0.296 | 0.007  | 0.995 | 0.562 | 1.787 |
| MBNL2      | -0.247 | 0.296 | -0.833 | 0.405 | 0.781 | 0.232 | -0.944 | 0.345 | 0.437 | 1.397 |
| MBNL1      | -0.525 | 0.301 | -1.746 | 0.081 | 0.592 | 0.178 | -2.296 | 0.022 | 0.328 | 1.066 |
| MBL2       | 0.382  | 0.3   | 1.276  | 0.202 | 1.466 | 0.439 | 1.061  | 0.289 | 0.815 | 2.636 |
| MBIP       | 0.199  | 0.296 | 0.671  | 0.502 | 1.22  | 0.361 | 0.609  | 0.543 | 0.683 | 2.18  |
| MBD5       | 0.196  | 0.299 | 0.656  | 0.512 | 1.217 | 0.363 | 0.596  | 0.551 | 0.677 | 2.185 |
| MBD4       | 0.67   | 0.31  | 2.16   | 0.031 | 1.953 | 0.606 | 1.574  | 0.115 | 1.064 | 3.587 |

|          |        |       |        |       |       |       |        |       |       |       |
|----------|--------|-------|--------|-------|-------|-------|--------|-------|-------|-------|
| MBD3     | 0.212  | 0.296 | 0.714  | 0.475 | 1.236 | 0.366 | 0.644  | 0.52  | 0.691 | 2.208 |
| MBD2     | 0.425  | 0.3   | 1.417  | 0.156 | 1.53  | 0.459 | 1.155  | 0.248 | 0.85  | 2.755 |
| MBD1     | -0.078 | 0.295 | -0.263 | 0.793 | 0.925 | 0.273 | -0.273 | 0.785 | 0.519 | 1.651 |
| MB       | 0.086  | 0.295 | 0.291  | 0.771 | 1.09  | 0.321 | 0.279  | 0.781 | 0.611 | 1.943 |
| MAZ      | -0.371 | 0.298 | -1.247 | 0.213 | 0.69  | 0.205 | -1.509 | 0.131 | 0.385 | 1.237 |
| MAX      | 0.074  | 0.296 | 0.249  | 0.804 | 1.076 | 0.319 | 0.24   | 0.811 | 0.602 | 1.923 |
| MAVS     | -0.175 | 0.298 | -0.588 | 0.556 | 0.839 | 0.25  | -0.643 | 0.52  | 0.468 | 1.505 |
| MAU2     | 0.561  | 0.31  | 1.81   | 0.07  | 1.753 | 0.544 | 1.385  | 0.166 | 0.954 | 3.221 |
| MATN4    | 0.334  | 0.298 | 1.121  | 0.262 | 1.396 | 0.416 | 0.953  | 0.34  | 0.779 | 2.503 |
| MATN3    | -0.683 | 0.31  | -2.203 | 0.028 | 0.505 | 0.157 | -3.16  | 0.002 | 0.275 | 0.927 |
| MATN2    | 0.329  | 0.3   | 1.1    | 0.272 | 1.39  | 0.416 | 0.937  | 0.349 | 0.773 | 2.5   |
| MATN1    | -0.192 | 0.296 | -0.649 | 0.516 | 0.825 | 0.244 | -0.716 | 0.474 | 0.462 | 1.474 |
| MATK     | -0.22  | 0.296 | -0.744 | 0.457 | 0.802 | 0.238 | -0.832 | 0.406 | 0.449 | 1.434 |
| MAT2B    | -0.242 | 0.296 | -0.818 | 0.414 | 0.785 | 0.233 | -0.925 | 0.355 | 0.439 | 1.403 |
| MAT2A    | 0.127  | 0.296 | 0.431  | 0.667 | 1.136 | 0.336 | 0.405  | 0.686 | 0.636 | 2.028 |
| MAT1A    | 0.061  | 0.295 | 0.207  | 0.836 | 1.063 | 0.314 | 0.201  | 0.841 | 0.596 | 1.897 |
| MAST4    | -0.16  | 0.299 | -0.536 | 0.592 | 0.852 | 0.255 | -0.581 | 0.561 | 0.474 | 1.531 |
| MAST3    | -0.513 | 0.307 | -1.674 | 0.094 | 0.599 | 0.184 | -2.187 | 0.029 | 0.328 | 1.092 |
| MAST2    | 0.47   | 0.3   | 1.569  | 0.117 | 1.6   | 0.479 | 1.252  | 0.211 | 0.89  | 2.879 |
| MAST1    | 0.086  | 0.296 | 0.292  | 0.77  | 1.09  | 0.322 | 0.28   | 0.779 | 0.611 | 1.946 |
| MASP2    | -0.368 | 0.3   | -1.224 | 0.221 | 0.692 | 0.208 | -1.479 | 0.139 | 0.384 | 1.248 |
| MASP1    | -0.178 | 0.296 | -0.6   | 0.548 | 0.837 | 0.248 | -0.657 | 0.511 | 0.468 | 1.496 |
| MAS1     | 0.338  | 0.298 | 1.137  | 0.256 | 1.403 | 0.417 | 0.964  | 0.335 | 0.783 | 2.513 |
| MARK4    | 0.089  | 0.295 | 0.302  | 0.763 | 1.093 | 0.323 | 0.289  | 0.773 | 0.613 | 1.951 |
| MARK3    | -0.357 | 0.3   | -1.193 | 0.233 | 0.699 | 0.21  | -1.434 | 0.152 | 0.389 | 1.258 |
| MARK2    | 0.093  | 0.296 | 0.315  | 0.753 | 1.098 | 0.325 | 0.301  | 0.764 | 0.615 | 1.96  |
| MARK1    | 0.147  | 0.296 | 0.495  | 0.62  | 1.158 | 0.343 | 0.461  | 0.645 | 0.648 | 2.071 |
| MARF1    | -0.579 | 0.303 | -1.908 | 0.056 | 0.561 | 0.17  | -2.585 | 0.01  | 0.309 | 1.016 |
| MARCO    | 0.14   | 0.296 | 0.474  | 0.635 | 1.15  | 0.34  | 0.442  | 0.658 | 0.645 | 2.053 |
| MARCKSL1 | -0.023 | 0.296 | -0.079 | 0.937 | 0.977 | 0.289 | -0.08  | 0.936 | 0.547 | 1.745 |
| MARCKS   | -0.047 | 0.295 | -0.16  | 0.873 | 0.954 | 0.281 | -0.164 | 0.87  | 0.535 | 1.701 |
| MARCHF8  | -0.772 | 0.315 | -2.45  | 0.014 | 0.462 | 0.146 | -3.693 | 0     | 0.249 | 0.857 |
| MARCHF7  | -0.116 | 0.295 | -0.393 | 0.695 | 0.891 | 0.263 | -0.416 | 0.677 | 0.499 | 1.589 |
| MARCHF6  | -0.272 | 0.298 | -0.913 | 0.361 | 0.762 | 0.227 | -1.049 | 0.294 | 0.425 | 1.366 |
| MARCHF5  | 0.273  | 0.296 | 0.922  | 0.357 | 1.314 | 0.389 | 0.807  | 0.42  | 0.735 | 2.348 |
| MARCHF3  | 0.251  | 0.297 | 0.845  | 0.398 | 1.285 | 0.381 | 0.747  | 0.455 | 0.718 | 2.299 |
| MARCHF2  | -0.465 | 0.307 | -1.514 | 0.13  | 0.628 | 0.193 | -1.928 | 0.054 | 0.344 | 1.147 |
| MARCHF1  | -0.019 | 0.296 | -0.065 | 0.949 | 0.981 | 0.29  | -0.065 | 0.948 | 0.55  | 1.751 |

|              |        |       |        |       |       |       |        |       |       |       |
|--------------|--------|-------|--------|-------|-------|-------|--------|-------|-------|-------|
| MAPT         | -0.537 | 0.306 | -1.757 | 0.079 | 0.584 | 0.179 | -2.327 | 0.02  | 0.321 | 1.064 |
| MAPRE3       | -0.149 | 0.298 | -0.501 | 0.616 | 0.861 | 0.257 | -0.54  | 0.589 | 0.48  | 1.544 |
| MAPRE2       | -0.643 | 0.306 | -2.102 | 0.036 | 0.526 | 0.161 | -2.948 | 0.003 | 0.289 | 0.958 |
| MAPRE1       | 0.678  | 0.31  | 2.187  | 0.029 | 1.97  | 0.611 | 1.588  | 0.112 | 1.073 | 3.618 |
| MAPKBP1      | -0.418 | 0.3   | -1.395 | 0.163 | 0.658 | 0.197 | -1.731 | 0.083 | 0.366 | 1.185 |
| MAPKAPK5-AS1 | 0.32   | 0.299 | 1.072  | 0.284 | 1.378 | 0.412 | 0.917  | 0.359 | 0.767 | 2.475 |
| MAPKAPK5     | 0.098  | 0.295 | 0.332  | 0.74  | 1.103 | 0.325 | 0.316  | 0.752 | 0.619 | 1.966 |
| MAPKAPK3     | -0.635 | 0.306 | -2.074 | 0.038 | 0.53  | 0.162 | -2.896 | 0.004 | 0.291 | 0.966 |
| MAPKAPK2     | 0.565  | 0.306 | 1.847  | 0.065 | 1.76  | 0.539 | 1.411  | 0.158 | 0.966 | 3.207 |
| MAPKAP1      | -0.024 | 0.295 | -0.08  | 0.936 | 0.977 | 0.288 | -0.081 | 0.935 | 0.547 | 1.742 |
| MAPK9        | 0.173  | 0.296 | 0.584  | 0.559 | 1.189 | 0.352 | 0.536  | 0.592 | 0.665 | 2.123 |
| MAPK8IP3     | 0.149  | 0.298 | 0.501  | 0.616 | 1.161 | 0.346 | 0.465  | 0.642 | 0.647 | 2.083 |
| MAPK8IP2     | -0.348 | 0.303 | -1.151 | 0.25  | 0.706 | 0.214 | -1.377 | 0.169 | 0.39  | 1.278 |
| MAPK8IP1     | -0.072 | 0.295 | -0.243 | 0.808 | 0.931 | 0.275 | -0.252 | 0.801 | 0.522 | 1.66  |
| MAPK8        | 0.389  | 0.299 | 1.3    | 0.194 | 1.475 | 0.441 | 1.077  | 0.281 | 0.821 | 2.652 |
| MAPK7        | -0.03  | 0.295 | -0.102 | 0.919 | 0.97  | 0.287 | -0.104 | 0.917 | 0.544 | 1.731 |
| MAPK6        | -0.314 | 0.298 | -1.053 | 0.292 | 0.731 | 0.218 | -1.237 | 0.216 | 0.407 | 1.311 |
| MAPK4        | -0.499 | 0.3   | -1.66  | 0.097 | 0.607 | 0.182 | -2.153 | 0.031 | 0.337 | 1.094 |
| MAPK3        | -0.407 | 0.303 | -1.343 | 0.179 | 0.666 | 0.202 | -1.657 | 0.098 | 0.368 | 1.206 |
| MAPK1IP1L    | 0.506  | 0.302 | 1.672  | 0.094 | 1.658 | 0.501 | 1.313  | 0.189 | 0.917 | 2.999 |
| MAPK14       | 0.852  | 0.308 | 2.764  | 0.006 | 2.343 | 0.722 | 1.861  | 0.063 | 1.281 | 4.286 |
| MAPK13       | 0.009  | 0.295 | 0.031  | 0.975 | 1.009 | 0.298 | 0.031  | 0.975 | 0.566 | 1.8   |
| MAPK12       | 0.127  | 0.295 | 0.43   | 0.667 | 1.135 | 0.335 | 0.404  | 0.686 | 0.636 | 2.025 |
| MAPK11       | -0.162 | 0.295 | -0.549 | 0.583 | 0.85  | 0.251 | -0.596 | 0.551 | 0.477 | 1.517 |
| MAPK10       | 0.09   | 0.296 | 0.304  | 0.761 | 1.094 | 0.323 | 0.291  | 0.771 | 0.613 | 1.953 |
| MAPK1        | -0.073 | 0.296 | -0.245 | 0.807 | 0.93  | 0.276 | -0.254 | 0.8   | 0.52  | 1.662 |
| MAP9         | 0.171  | 0.296 | 0.578  | 0.563 | 1.186 | 0.351 | 0.531  | 0.595 | 0.664 | 2.119 |
| MAP7D3       | -0.21  | 0.297 | -0.707 | 0.48  | 0.811 | 0.241 | -0.786 | 0.432 | 0.453 | 1.451 |
| MAP7D1       | 0.034  | 0.295 | 0.115  | 0.909 | 1.034 | 0.305 | 0.113  | 0.91  | 0.58  | 1.845 |
| MAP7         | -0.015 | 0.295 | -0.053 | 0.958 | 0.985 | 0.29  | -0.053 | 0.958 | 0.552 | 1.755 |
| MAP6D1       | 0.551  | 0.303 | 1.818  | 0.069 | 1.735 | 0.526 | 1.398  | 0.162 | 0.958 | 3.144 |
| MAP4K5       | -0.178 | 0.296 | -0.599 | 0.549 | 0.837 | 0.248 | -0.656 | 0.512 | 0.468 | 1.497 |
| MAP4K4       | -0.596 | 0.302 | -1.975 | 0.048 | 0.551 | 0.166 | -2.701 | 0.007 | 0.305 | 0.995 |
| MAP4K3       | -0.059 | 0.295 | -0.2   | 0.841 | 0.943 | 0.278 | -0.206 | 0.837 | 0.528 | 1.682 |
| MAP4K2       | 0.556  | 0.304 | 1.828  | 0.068 | 1.743 | 0.53  | 1.403  | 0.161 | 0.961 | 3.162 |
| MAP4K1       | 0.026  | 0.296 | 0.088  | 0.93  | 1.026 | 0.303 | 0.087  | 0.931 | 0.575 | 1.832 |
| MAP4         | -0.101 | 0.295 | -0.34  | 0.734 | 0.904 | 0.267 | -0.358 | 0.72  | 0.507 | 1.613 |
| MAP3K9       | 0.16   | 0.296 | 0.54   | 0.59  | 1.173 | 0.348 | 0.499  | 0.618 | 0.657 | 2.097 |

|          |        |       |        |       |       |       |        |       |       |       |
|----------|--------|-------|--------|-------|-------|-------|--------|-------|-------|-------|
| MAP3K8   | -0.037 | 0.295 | -0.127 | 0.899 | 0.963 | 0.284 | -0.129 | 0.897 | 0.54  | 1.717 |
| MAP3K7CL | -0.532 | 0.31  | -1.718 | 0.086 | 0.587 | 0.182 | -2.267 | 0.023 | 0.32  | 1.078 |
| MAP3K7   | -0.076 | 0.296 | -0.258 | 0.796 | 0.926 | 0.274 | -0.268 | 0.789 | 0.518 | 1.655 |
| MAP3K6   | -0.541 | 0.306 | -1.769 | 0.077 | 0.582 | 0.178 | -2.346 | 0.019 | 0.32  | 1.06  |
| MAP3K5   | -0.471 | 0.302 | -1.559 | 0.119 | 0.624 | 0.189 | -1.992 | 0.046 | 0.345 | 1.129 |
| MAP3K4   | -0.09  | 0.296 | -0.304 | 0.761 | 0.914 | 0.271 | -0.319 | 0.75  | 0.511 | 1.634 |
| MAP3K3   | -0.126 | 0.295 | -0.426 | 0.67  | 0.882 | 0.26  | -0.454 | 0.65  | 0.494 | 1.573 |
| MAP3K20  | 0.339  | 0.298 | 1.138  | 0.255 | 1.403 | 0.418 | 0.966  | 0.334 | 0.783 | 2.515 |
| MAP3K2   | -0.571 | 0.306 | -1.867 | 0.062 | 0.565 | 0.173 | -2.517 | 0.012 | 0.311 | 1.029 |
| MAP3K19  | 0.208  | 0.296 | 0.701  | 0.483 | 1.231 | 0.365 | 0.633  | 0.527 | 0.689 | 2.2   |
| MAP3K14  | -0.15  | 0.297 | -0.504 | 0.614 | 0.861 | 0.256 | -0.544 | 0.587 | 0.481 | 1.54  |
| MAP3K13  | -0.141 | 0.296 | -0.476 | 0.634 | 0.869 | 0.257 | -0.511 | 0.609 | 0.487 | 1.55  |
| MAP3K12  | -0.387 | 0.302 | -1.278 | 0.201 | 0.679 | 0.205 | -1.56  | 0.119 | 0.376 | 1.229 |
| MAP3K11  | 0.816  | 0.316 | 2.587  | 0.01  | 2.262 | 0.714 | 1.768  | 0.077 | 1.219 | 4.199 |
| MAP3K10  | 0.552  | 0.302 | 1.825  | 0.068 | 1.737 | 0.525 | 1.403  | 0.161 | 0.96  | 3.141 |
| MAP3K1   | 0.163  | 0.296 | 0.552  | 0.581 | 1.177 | 0.348 | 0.51   | 0.61  | 0.66  | 2.101 |
| MAP2K7   | 0.169  | 0.296 | 0.572  | 0.567 | 1.184 | 0.35  | 0.526  | 0.599 | 0.663 | 2.115 |
| MAP2K6   | 0.314  | 0.3   | 1.047  | 0.295 | 1.369 | 0.41  | 0.899  | 0.369 | 0.761 | 2.464 |
| MAP2K5   | -0.114 | 0.296 | -0.384 | 0.701 | 0.892 | 0.264 | -0.407 | 0.684 | 0.499 | 1.595 |
| MAP2K4   | 0.021  | 0.295 | 0.07   | 0.945 | 1.021 | 0.301 | 0.069  | 0.945 | 0.572 | 1.82  |
| MAP2K2   | -0.529 | 0.302 | -1.749 | 0.08  | 0.589 | 0.178 | -2.304 | 0.021 | 0.326 | 1.066 |
| MAP2K1   | -0.007 | 0.295 | -0.023 | 0.982 | 0.993 | 0.293 | -0.023 | 0.982 | 0.557 | 1.772 |
| MAP2     | 0.316  | 0.3   | 1.053  | 0.292 | 1.372 | 0.411 | 0.903  | 0.366 | 0.762 | 2.469 |
| MAP1S    | 0.064  | 0.295 | 0.217  | 0.828 | 1.066 | 0.315 | 0.21   | 0.834 | 0.598 | 1.902 |
| MAP1LC3C | -0.157 | 0.296 | -0.531 | 0.595 | 0.854 | 0.253 | -0.575 | 0.565 | 0.478 | 1.527 |
| MAP1LC3B | -0.606 | 0.306 | -1.981 | 0.048 | 0.546 | 0.167 | -2.722 | 0.006 | 0.3   | 0.994 |
| MAP1B    | 0.292  | 0.3   | 0.972  | 0.331 | 1.339 | 0.402 | 0.843  | 0.399 | 0.743 | 2.412 |
| MAP1A    | -0.48  | 0.299 | -1.603 | 0.109 | 0.619 | 0.185 | -2.057 | 0.04  | 0.344 | 1.113 |
| MAP11    | 0.672  | 0.306 | 2.194  | 0.028 | 1.958 | 0.599 | 1.598  | 0.11  | 1.074 | 3.568 |
| MAOB     | -0.161 | 0.296 | -0.542 | 0.588 | 0.852 | 0.252 | -0.588 | 0.557 | 0.476 | 1.522 |
| MAOA     | -0.56  | 0.306 | -1.832 | 0.067 | 0.571 | 0.175 | -2.455 | 0.014 | 0.314 | 1.04  |
| MANSC1   | 0.354  | 0.298 | 1.189  | 0.235 | 1.425 | 0.424 | 1.001  | 0.317 | 0.795 | 2.553 |
| MANF     | 0.486  | 0.3   | 1.619  | 0.105 | 1.627 | 0.489 | 1.282  | 0.2   | 0.903 | 2.931 |
| MANEA    | -0.091 | 0.295 | -0.308 | 0.758 | 0.913 | 0.27  | -0.322 | 0.747 | 0.512 | 1.629 |
| MANBA    | -0.255 | 0.297 | -0.858 | 0.391 | 0.775 | 0.23  | -0.977 | 0.329 | 0.433 | 1.388 |
| MAN2C1   | -0.322 | 0.297 | -1.086 | 0.278 | 0.725 | 0.215 | -1.281 | 0.2   | 0.405 | 1.296 |
| MAN2B2   | -0.265 | 0.302 | -0.878 | 0.38  | 0.767 | 0.231 | -1.005 | 0.315 | 0.425 | 1.386 |
| MAN2B1   | -0.101 | 0.297 | -0.34  | 0.734 | 0.904 | 0.268 | -0.357 | 0.721 | 0.506 | 1.617 |

|         |        |       |        |       |       |       |        |       |       |       |
|---------|--------|-------|--------|-------|-------|-------|--------|-------|-------|-------|
| MAN2A2  | -0.011 | 0.295 | -0.038 | 0.97  | 0.989 | 0.292 | -0.038 | 0.97  | 0.555 | 1.764 |
| MAN2A1  | -0.412 | 0.302 | -1.364 | 0.173 | 0.662 | 0.2   | -1.688 | 0.091 | 0.366 | 1.197 |
| MAN1C1  | -0.03  | 0.297 | -0.099 | 0.921 | 0.971 | 0.288 | -0.101 | 0.92  | 0.543 | 1.737 |
| MAN1B1  | -0.611 | 0.31  | -1.971 | 0.049 | 0.543 | 0.168 | -2.716 | 0.007 | 0.296 | 0.997 |
| MAN1A2  | -0.559 | 0.306 | -1.829 | 0.067 | 0.572 | 0.175 | -2.45  | 0.014 | 0.314 | 1.041 |
| MAN1A1  | -0.839 | 0.315 | -2.665 | 0.008 | 0.432 | 0.136 | -4.173 | 0     | 0.233 | 0.801 |
| MAMLD1  | -0.026 | 0.295 | -0.09  | 0.929 | 0.974 | 0.288 | -0.091 | 0.928 | 0.546 | 1.738 |
| MAML3   | -0.842 | 0.316 | -2.669 | 0.008 | 0.431 | 0.136 | -4.189 | 0     | 0.232 | 0.799 |
| MAML1   | -0.59  | 0.303 | -1.944 | 0.052 | 0.554 | 0.168 | -2.648 | 0.008 | 0.306 | 1.005 |
| MALT1   | 0.096  | 0.295 | 0.324  | 0.746 | 1.1   | 0.325 | 0.309  | 0.757 | 0.617 | 1.962 |
| MALL    | -0.134 | 0.295 | -0.454 | 0.65  | 0.875 | 0.258 | -0.486 | 0.627 | 0.49  | 1.56  |
| MAL     | 0.114  | 0.296 | 0.386  | 0.699 | 1.121 | 0.331 | 0.365  | 0.715 | 0.628 | 2.001 |
| MAK16   | -0.211 | 0.296 | -0.711 | 0.477 | 0.81  | 0.24  | -0.791 | 0.429 | 0.453 | 1.448 |
| MAK     | -0.613 | 0.306 | -2.004 | 0.045 | 0.542 | 0.166 | -2.766 | 0.006 | 0.297 | 0.987 |
| MAIP1   | 0.995  | 0.328 | 3.039  | 0.002 | 2.706 | 0.886 | 1.924  | 0.054 | 1.424 | 5.142 |
| MAGT1   | 0.596  | 0.303 | 1.967  | 0.049 | 1.814 | 0.549 | 1.482  | 0.138 | 1.002 | 3.284 |
| MAGOHB  | 0.344  | 0.3   | 1.148  | 0.251 | 1.411 | 0.423 | 0.972  | 0.331 | 0.784 | 2.537 |
| MAGOH2P | 0.184  | 0.296 | 0.621  | 0.534 | 1.202 | 0.355 | 0.567  | 0.57  | 0.673 | 2.146 |
| MAGIX   | -0.051 | 0.295 | -0.174 | 0.862 | 0.95  | 0.28  | -0.179 | 0.858 | 0.533 | 1.694 |
| MAGI2   | -0.336 | 0.3   | -1.12  | 0.263 | 0.715 | 0.214 | -1.331 | 0.183 | 0.397 | 1.287 |
| MAGI1   | -0.166 | 0.296 | -0.56  | 0.576 | 0.847 | 0.251 | -0.609 | 0.543 | 0.474 | 1.514 |
| MAGEL2  | -0.216 | 0.295 | -0.732 | 0.464 | 0.805 | 0.238 | -0.818 | 0.414 | 0.451 | 1.437 |
| MAGEH1  | -0.04  | 0.295 | -0.137 | 0.891 | 0.96  | 0.283 | -0.14  | 0.889 | 0.539 | 1.712 |
| MAGEF1  | 1.056  | 0.321 | 3.288  | 0.001 | 2.875 | 0.923 | 2.03   | 0.042 | 1.532 | 5.396 |
| MAGED2  | 0.061  | 0.295 | 0.205  | 0.838 | 1.062 | 0.314 | 0.199  | 0.842 | 0.595 | 1.896 |
| MAGED1  | 0.068  | 0.295 | 0.23   | 0.818 | 1.07  | 0.316 | 0.223  | 0.824 | 0.6   | 1.909 |
| MAGEC3  | 0.223  | 0.298 | 0.749  | 0.454 | 1.25  | 0.373 | 0.671  | 0.502 | 0.697 | 2.243 |
| MAGEC2  | 0.179  | 0.295 | 0.606  | 0.544 | 1.196 | 0.353 | 0.555  | 0.579 | 0.67  | 2.135 |
| MAGEC1  | -0.067 | 0.296 | -0.226 | 0.821 | 0.935 | 0.276 | -0.234 | 0.815 | 0.524 | 1.669 |
| MAGEB4  | 0.187  | 0.296 | 0.63   | 0.529 | 1.205 | 0.357 | 0.575  | 0.565 | 0.674 | 2.155 |
| MAGEB3  | -0.169 | 0.296 | -0.571 | 0.568 | 0.844 | 0.25  | -0.622 | 0.534 | 0.473 | 1.509 |
| MAGEB2  | 0.013  | 0.297 | 0.044  | 0.965 | 1.013 | 0.301 | 0.044  | 0.965 | 0.566 | 1.814 |
| MAGEB1  | 0.741  | 0.307 | 2.412  | 0.016 | 2.099 | 0.645 | 1.703  | 0.088 | 1.149 | 3.833 |
| MAGEA8  | 1.088  | 0.336 | 3.235  | 0.001 | 2.967 | 0.997 | 1.972  | 0.049 | 1.535 | 5.733 |
| MAGEA6  | -0.345 | 0.3   | -1.151 | 0.25  | 0.708 | 0.212 | -1.374 | 0.169 | 0.394 | 1.275 |
| MAGEA4  | -0.035 | 0.296 | -0.119 | 0.905 | 0.965 | 0.286 | -0.121 | 0.904 | 0.54  | 1.725 |
| MAGEA12 | 0.295  | 0.297 | 0.995  | 0.32  | 1.343 | 0.399 | 0.861  | 0.389 | 0.751 | 2.403 |
| MAGEA11 | 0.62   | 0.303 | 2.043  | 0.041 | 1.859 | 0.564 | 1.523  | 0.128 | 1.026 | 3.368 |

|           |        |       |        |       |       |       |        |       |       |       |
|-----------|--------|-------|--------|-------|-------|-------|--------|-------|-------|-------|
| MAGEA10   | 0.525  | 0.3   | 1.752  | 0.08  | 1.691 | 0.507 | 1.363  | 0.173 | 0.939 | 3.045 |
| MAGEA1    | 0.256  | 0.296 | 0.864  | 0.388 | 1.292 | 0.383 | 0.762  | 0.446 | 0.723 | 2.309 |
| MAG       | -0.277 | 0.297 | -0.933 | 0.351 | 0.758 | 0.225 | -1.075 | 0.283 | 0.423 | 1.357 |
| MAFK      | 0.078  | 0.297 | 0.262  | 0.793 | 1.081 | 0.321 | 0.252  | 0.801 | 0.604 | 1.934 |
| MAFG      | 0.772  | 0.315 | 2.453  | 0.014 | 2.163 | 0.681 | 1.709  | 0.087 | 1.168 | 4.008 |
| MAFF      | 0.128  | 0.295 | 0.433  | 0.665 | 1.136 | 0.336 | 0.407  | 0.684 | 0.637 | 2.027 |
| MAFB      | -0.144 | 0.295 | -0.488 | 0.626 | 0.866 | 0.256 | -0.525 | 0.6   | 0.485 | 1.545 |
| MAF       | -0.807 | 0.308 | -2.618 | 0.009 | 0.446 | 0.138 | -4.026 | 0     | 0.244 | 0.816 |
| MAEA      | 0.17   | 0.296 | 0.574  | 0.566 | 1.185 | 0.35  | 0.528  | 0.598 | 0.664 | 2.115 |
| MADD      | 0.044  | 0.296 | 0.148  | 0.883 | 1.045 | 0.309 | 0.144  | 0.885 | 0.585 | 1.866 |
| MADCAM1   | 0.687  | 0.31  | 2.218  | 0.027 | 1.987 | 0.615 | 1.604  | 0.109 | 1.083 | 3.646 |
| MAD2L1BP  | 0.073  | 0.295 | 0.249  | 0.803 | 1.076 | 0.318 | 0.24   | 0.81  | 0.604 | 1.919 |
| MAD2L1    | 0.661  | 0.31  | 2.132  | 0.033 | 1.937 | 0.6   | 1.56   | 0.119 | 1.055 | 3.556 |
| MAD1L1    | -0.719 | 0.315 | -2.282 | 0.022 | 0.487 | 0.153 | -3.34  | 0.001 | 0.263 | 0.903 |
| MACROH2A2 | 1.073  | 0.329 | 3.266  | 0.001 | 2.925 | 0.961 | 2.002  | 0.045 | 1.536 | 5.571 |
| MACROH2A1 | 0.781  | 0.315 | 2.481  | 0.013 | 2.183 | 0.687 | 1.722  | 0.085 | 1.178 | 4.046 |
| MACROD1   | 0.42   | 0.299 | 1.407  | 0.159 | 1.523 | 0.455 | 1.148  | 0.251 | 0.848 | 2.735 |
| MACO1     | 0.115  | 0.295 | 0.39   | 0.697 | 1.122 | 0.331 | 0.368  | 0.713 | 0.629 | 2.002 |
| MACIR     | -0.067 | 0.297 | -0.225 | 0.822 | 0.935 | 0.278 | -0.233 | 0.816 | 0.523 | 1.674 |
| MACF1     | -0.559 | 0.306 | -1.828 | 0.068 | 0.572 | 0.175 | -2.448 | 0.014 | 0.314 | 1.041 |
| MAB21L4   | 0.478  | 0.303 | 1.58   | 0.114 | 1.613 | 0.488 | 1.256  | 0.209 | 0.891 | 2.92  |
| MAB21L2   | -0.292 | 0.298 | -0.981 | 0.327 | 0.746 | 0.222 | -1.14  | 0.254 | 0.416 | 1.339 |
| M6PR      | -0.725 | 0.315 | -2.303 | 0.021 | 0.485 | 0.152 | -3.381 | 0.001 | 0.262 | 0.898 |
| LZTS3     | 0.134  | 0.296 | 0.451  | 0.652 | 1.143 | 0.339 | 0.422  | 0.673 | 0.639 | 2.043 |
| LZTS1     | 0.052  | 0.296 | 0.176  | 0.86  | 1.054 | 0.312 | 0.172  | 0.864 | 0.59  | 1.881 |
| LZTR1     | 0.066  | 0.297 | 0.224  | 0.823 | 1.069 | 0.317 | 0.217  | 0.829 | 0.597 | 1.912 |
| LZTFL1    | -0.591 | 0.306 | -1.935 | 0.053 | 0.554 | 0.169 | -2.639 | 0.008 | 0.304 | 1.008 |
| LYZL6     | -0.143 | 0.296 | -0.482 | 0.63  | 0.867 | 0.257 | -0.518 | 0.604 | 0.485 | 1.549 |
| LYZ       | 0.168  | 0.298 | 0.562  | 0.574 | 1.183 | 0.353 | 0.518  | 0.605 | 0.659 | 2.122 |
| LYVE1     | -0.268 | 0.297 | -0.903 | 0.366 | 0.765 | 0.227 | -1.036 | 0.3   | 0.428 | 1.368 |
| LYST      | -0.279 | 0.296 | -0.94  | 0.347 | 0.757 | 0.224 | -1.084 | 0.278 | 0.423 | 1.353 |
| LYRM9     | 0.015  | 0.297 | 0.052  | 0.959 | 1.015 | 0.302 | 0.051  | 0.959 | 0.567 | 1.817 |
| LYRM4     | -0.225 | 0.296 | -0.759 | 0.448 | 0.798 | 0.237 | -0.852 | 0.394 | 0.447 | 1.427 |
| LYRM2     | 0.566  | 0.303 | 1.869  | 0.062 | 1.761 | 0.533 | 1.427  | 0.154 | 0.973 | 3.188 |
| LYRM1     | -0.32  | 0.298 | -1.077 | 0.282 | 0.726 | 0.216 | -1.269 | 0.204 | 0.405 | 1.301 |
| LYPLA2    | -0.205 | 0.296 | -0.692 | 0.489 | 0.815 | 0.241 | -0.768 | 0.443 | 0.456 | 1.456 |
| LYPLA1    | 0.014  | 0.296 | 0.046  | 0.963 | 1.014 | 0.3   | 0.046  | 0.963 | 0.567 | 1.811 |
| LYPD3     | -0.267 | 0.301 | -0.887 | 0.375 | 0.766 | 0.23  | -1.016 | 0.309 | 0.425 | 1.381 |

|        |        |       |        |       |       |       |        |       |       |       |
|--------|--------|-------|--------|-------|-------|-------|--------|-------|-------|-------|
| LYPD1  | 0.203  | 0.295 | 0.686  | 0.493 | 1.225 | 0.362 | 0.621  | 0.535 | 0.686 | 2.185 |
| LYN    | -0.051 | 0.296 | -0.173 | 0.863 | 0.95  | 0.281 | -0.177 | 0.859 | 0.532 | 1.698 |
| LYL1   | -0.365 | 0.298 | -1.224 | 0.221 | 0.694 | 0.207 | -1.478 | 0.14  | 0.387 | 1.245 |
| LY96   | -0.675 | 0.306 | -2.207 | 0.027 | 0.509 | 0.156 | -3.153 | 0.002 | 0.279 | 0.927 |
| LY9    | -0.581 | 0.303 | -1.918 | 0.055 | 0.559 | 0.17  | -2.601 | 0.009 | 0.309 | 1.013 |
| LY86   | -0.505 | 0.306 | -1.65  | 0.099 | 0.603 | 0.185 | -2.147 | 0.032 | 0.331 | 1.1   |
| LY75   | -0.344 | 0.298 | -1.156 | 0.248 | 0.709 | 0.211 | -1.38  | 0.168 | 0.396 | 1.27  |
| LY6H   | -0.048 | 0.295 | -0.161 | 0.872 | 0.954 | 0.282 | -0.165 | 0.869 | 0.535 | 1.701 |
| LY6G6E | -0.193 | 0.296 | -0.653 | 0.514 | 0.824 | 0.244 | -0.72  | 0.471 | 0.461 | 1.473 |
| LY6G6C | 0.213  | 0.298 | 0.714  | 0.475 | 1.237 | 0.369 | 0.643  | 0.52  | 0.69  | 2.219 |
| LY6G5C | 0.294  | 0.298 | 0.986  | 0.324 | 1.341 | 0.399 | 0.855  | 0.393 | 0.748 | 2.405 |
| LY6E   | 0.672  | 0.31  | 2.17   | 0.03  | 1.959 | 0.607 | 1.58   | 0.114 | 1.067 | 3.595 |
| LY6D   | 0.488  | 0.302 | 1.614  | 0.107 | 1.629 | 0.493 | 1.277  | 0.202 | 0.901 | 2.948 |
| LXN    | -0.379 | 0.3   | -1.263 | 0.207 | 0.685 | 0.205 | -1.535 | 0.125 | 0.381 | 1.232 |
| LUZP4  | -0.265 | 0.299 | -0.887 | 0.375 | 0.767 | 0.229 | -1.016 | 0.31  | 0.427 | 1.378 |
| LUZP2  | -0.08  | 0.296 | -0.272 | 0.786 | 0.923 | 0.273 | -0.283 | 0.777 | 0.517 | 1.647 |
| LUZP1  | 0.296  | 0.297 | 0.995  | 0.32  | 1.344 | 0.4   | 0.861  | 0.389 | 0.75  | 2.408 |
| LUNAR1 | -0.141 | 0.295 | -0.476 | 0.634 | 0.869 | 0.257 | -0.511 | 0.609 | 0.487 | 1.55  |
| LUM    | -0.685 | 0.303 | -2.257 | 0.024 | 0.504 | 0.153 | -3.242 | 0.001 | 0.278 | 0.914 |
| LUC7L3 | 0.48   | 0.3   | 1.6    | 0.11  | 1.615 | 0.484 | 1.271  | 0.204 | 0.898 | 2.907 |
| LUC7L  | 0.126  | 0.296 | 0.427  | 0.67  | 1.134 | 0.336 | 0.401  | 0.689 | 0.635 | 2.026 |
| LTN1   | -0.778 | 0.31  | -2.509 | 0.012 | 0.459 | 0.142 | -3.797 | 0     | 0.25  | 0.843 |
| LTK    | -0.349 | 0.297 | -1.175 | 0.24  | 0.705 | 0.21  | -1.406 | 0.16  | 0.394 | 1.263 |
| LTF    | -0.479 | 0.3   | -1.599 | 0.11  | 0.619 | 0.186 | -2.051 | 0.04  | 0.344 | 1.114 |
| LTC4S  | -0.291 | 0.303 | -0.96  | 0.337 | 0.747 | 0.227 | -1.114 | 0.265 | 0.412 | 1.354 |
| LTBR   | -0.355 | 0.3   | -1.184 | 0.237 | 0.702 | 0.21  | -1.421 | 0.155 | 0.39  | 1.262 |
| LTBP4  | 0.304  | 0.298 | 1.02   | 0.308 | 1.355 | 0.403 | 0.88   | 0.379 | 0.756 | 2.428 |
| LTBP3  | -0.732 | 0.315 | -2.324 | 0.02  | 0.481 | 0.152 | -3.427 | 0.001 | 0.259 | 0.892 |
| LTBP2  | -0.45  | 0.298 | -1.509 | 0.131 | 0.638 | 0.19  | -1.906 | 0.057 | 0.355 | 1.144 |
| LTBP1  | -0.5   | 0.301 | -1.664 | 0.096 | 0.606 | 0.182 | -2.159 | 0.031 | 0.336 | 1.093 |
| LTB4R2 | 0.382  | 0.3   | 1.273  | 0.203 | 1.465 | 0.439 | 1.058  | 0.29  | 0.814 | 2.637 |
| LTB4R  | -0.083 | 0.296 | -0.281 | 0.779 | 0.92  | 0.272 | -0.293 | 0.769 | 0.515 | 1.643 |
| LTB    | -0.62  | 0.306 | -2.026 | 0.043 | 0.538 | 0.165 | -2.807 | 0.005 | 0.295 | 0.98  |
| LTA4H  | -0.136 | 0.296 | -0.459 | 0.646 | 0.873 | 0.259 | -0.491 | 0.623 | 0.488 | 1.56  |
| LTA    | -0.26  | 0.298 | -0.873 | 0.383 | 0.771 | 0.23  | -0.997 | 0.319 | 0.43  | 1.383 |
| LST1   | -0.212 | 0.296 | -0.715 | 0.474 | 0.809 | 0.24  | -0.797 | 0.426 | 0.453 | 1.446 |
| LSS    | 0.266  | 0.298 | 0.894  | 0.372 | 1.305 | 0.389 | 0.785  | 0.433 | 0.728 | 2.339 |
| LSR    | 0.361  | 0.298 | 1.211  | 0.226 | 1.434 | 0.427 | 1.017  | 0.309 | 0.8   | 2.57  |



|           |        |       |        |       |       |       |        |       |       |       |
|-----------|--------|-------|--------|-------|-------|-------|--------|-------|-------|-------|
| LSP1      | -0.557 | 0.303 | -1.839 | 0.066 | 0.573 | 0.174 | -2.46  | 0.014 | 0.317 | 1.037 |
| LSM8      | 0.476  | 0.3   | 1.588  | 0.112 | 1.61  | 0.483 | 1.263  | 0.207 | 0.894 | 2.898 |
| LSM7      | 0.091  | 0.296 | 0.309  | 0.758 | 1.096 | 0.324 | 0.295  | 0.768 | 0.614 | 1.956 |
| LSM6      | 0.396  | 0.3   | 1.32   | 0.187 | 1.485 | 0.445 | 1.091  | 0.275 | 0.826 | 2.671 |
| LSM5      | 0.483  | 0.302 | 1.6    | 0.11  | 1.622 | 0.49  | 1.268  | 0.205 | 0.897 | 2.933 |
| LSM4      | 0.008  | 0.295 | 0.027  | 0.978 | 1.008 | 0.298 | 0.027  | 0.978 | 0.565 | 1.799 |
| LSM3      | -0.1   | 0.297 | -0.338 | 0.735 | 0.905 | 0.268 | -0.355 | 0.722 | 0.506 | 1.618 |
| LSM2      | -0.084 | 0.295 | -0.284 | 0.776 | 0.92  | 0.272 | -0.296 | 0.767 | 0.515 | 1.64  |
| LSM14B    | 1.288  | 0.337 | 3.818  | 0     | 3.625 | 1.223 | 2.147  | 0.032 | 1.872 | 7.022 |
| LSM14A    | -0.278 | 0.3   | -0.924 | 0.355 | 0.758 | 0.228 | -1.065 | 0.287 | 0.421 | 1.365 |
| LSM12     | 0.24   | 0.296 | 0.809  | 0.418 | 1.271 | 0.377 | 0.72   | 0.472 | 0.711 | 2.272 |
| LSM1      | 0.475  | 0.3   | 1.581  | 0.114 | 1.608 | 0.483 | 1.258  | 0.208 | 0.892 | 2.896 |
| LSG1      | 0.496  | 0.301 | 1.65   | 0.099 | 1.642 | 0.494 | 1.301  | 0.193 | 0.911 | 2.959 |
| LSAMP     | -0.345 | 0.298 | -1.159 | 0.247 | 0.708 | 0.211 | -1.383 | 0.167 | 0.395 | 1.269 |
| LRMT1     | 0.166  | 0.296 | 0.562  | 0.574 | 1.181 | 0.35  | 0.518  | 0.605 | 0.661 | 2.11  |
| LRRTM4    | -0.138 | 0.296 | -0.465 | 0.642 | 0.871 | 0.258 | -0.499 | 0.618 | 0.487 | 1.557 |
| LRRTM2    | -0.068 | 0.295 | -0.229 | 0.819 | 0.935 | 0.276 | -0.237 | 0.813 | 0.524 | 1.667 |
| LRRN3     | -0.849 | 0.315 | -2.699 | 0.007 | 0.428 | 0.135 | -4.252 | 0     | 0.231 | 0.792 |
| LRRN2     | 0.47   | 0.303 | 1.555  | 0.12  | 1.601 | 0.484 | 1.24   | 0.215 | 0.885 | 2.896 |
| LRRK1     | -0.671 | 0.31  | -2.164 | 0.031 | 0.511 | 0.159 | -3.083 | 0.002 | 0.278 | 0.939 |
| LRRFIP2   | 0.327  | 0.297 | 1.101  | 0.271 | 1.387 | 0.412 | 0.939  | 0.348 | 0.775 | 2.482 |
| LRRFIP1   | -0.152 | 0.297 | -0.513 | 0.608 | 0.859 | 0.255 | -0.554 | 0.58  | 0.48  | 1.536 |
| LRRC8E    | -0.023 | 0.296 | -0.078 | 0.938 | 0.977 | 0.289 | -0.079 | 0.937 | 0.547 | 1.746 |
| LRRC8D    | 0.621  | 0.306 | 2.031  | 0.042 | 1.861 | 0.569 | 1.513  | 0.13  | 1.022 | 3.387 |
| LRRC8B    | 0.218  | 0.295 | 0.738  | 0.46  | 1.244 | 0.367 | 0.663  | 0.507 | 0.697 | 2.219 |
| LRRC75B   | 0.442  | 0.302 | 1.462  | 0.144 | 1.556 | 0.47  | 1.181  | 0.237 | 0.86  | 2.813 |
| LRRC61    | 0.076  | 0.296 | 0.256  | 0.798 | 1.079 | 0.319 | 0.247  | 0.805 | 0.604 | 1.927 |
| LRRC6     | 0.005  | 0.295 | 0.016  | 0.987 | 1.005 | 0.296 | 0.016  | 0.987 | 0.564 | 1.792 |
| LRRC59    | 0.206  | 0.296 | 0.695  | 0.487 | 1.229 | 0.364 | 0.628  | 0.53  | 0.688 | 2.196 |
| LRRC49    | -0.229 | 0.3   | -0.764 | 0.445 | 0.795 | 0.239 | -0.859 | 0.39  | 0.442 | 1.432 |
| LRRC47    | 0.055  | 0.296 | 0.186  | 0.853 | 1.057 | 0.313 | 0.181  | 0.857 | 0.591 | 1.888 |
| LRRC42    | 0.036  | 0.295 | 0.123  | 0.902 | 1.037 | 0.306 | 0.121  | 0.904 | 0.581 | 1.85  |
| LRRC41    | -0.118 | 0.296 | -0.398 | 0.691 | 0.889 | 0.263 | -0.422 | 0.673 | 0.497 | 1.589 |
| LRRC40    | -0.032 | 0.295 | -0.109 | 0.913 | 0.968 | 0.286 | -0.111 | 0.912 | 0.543 | 1.727 |
| LRRC37BP1 | 0.196  | 0.296 | 0.663  | 0.507 | 1.217 | 0.36  | 0.602  | 0.547 | 0.681 | 2.174 |
| LRRC37A2  | -0.381 | 0.3   | -1.27  | 0.204 | 0.683 | 0.205 | -1.546 | 0.122 | 0.379 | 1.23  |
| LRRC36    | -0.098 | 0.296 | -0.333 | 0.739 | 0.906 | 0.268 | -0.35  | 0.727 | 0.508 | 1.618 |
| LRRC32    | -0.646 | 0.306 | -2.115 | 0.034 | 0.524 | 0.16  | -2.973 | 0.003 | 0.288 | 0.954 |

|        |        |       |        |       |       |       |        |       |       |       |
|--------|--------|-------|--------|-------|-------|-------|--------|-------|-------|-------|
| LRRC31 | 0.126  | 0.296 | 0.424  | 0.671 | 1.134 | 0.336 | 0.399  | 0.69  | 0.634 | 2.027 |
| LRRC3  | -0.371 | 0.3   | -1.236 | 0.216 | 0.69  | 0.207 | -1.497 | 0.135 | 0.383 | 1.243 |
| LRRC23 | 0.09   | 0.295 | 0.306  | 0.76  | 1.095 | 0.323 | 0.292  | 0.77  | 0.614 | 1.952 |
| LRRC20 | 0.55   | 0.302 | 1.82   | 0.069 | 1.734 | 0.524 | 1.4    | 0.162 | 0.959 | 3.136 |
| LRRC2  | 0.162  | 0.298 | 0.544  | 0.587 | 1.176 | 0.35  | 0.502  | 0.616 | 0.656 | 2.108 |
| LRRC19 | 0.176  | 0.295 | 0.597  | 0.551 | 1.193 | 0.352 | 0.547  | 0.584 | 0.668 | 2.129 |
| LRRC17 | -0.78  | 0.315 | -2.478 | 0.013 | 0.459 | 0.144 | -3.753 | 0     | 0.247 | 0.85  |
| LRRC15 | -0.758 | 0.31  | -2.447 | 0.014 | 0.469 | 0.145 | -3.66  | 0     | 0.255 | 0.86  |
| LRRC14 | 0.428  | 0.3   | 1.429  | 0.153 | 1.534 | 0.46  | 1.163  | 0.245 | 0.853 | 2.76  |
| LRRC1  | 0.212  | 0.297 | 0.716  | 0.474 | 1.237 | 0.367 | 0.645  | 0.519 | 0.692 | 2.212 |
| LRPPRC | -0.092 | 0.296 | -0.309 | 0.757 | 0.912 | 0.27  | -0.324 | 0.746 | 0.511 | 1.631 |
| LRPAP1 | 0.66   | 0.304 | 2.168  | 0.03  | 1.934 | 0.588 | 1.587  | 0.112 | 1.065 | 3.511 |
| LRP8   | 0.588  | 0.303 | 1.94   | 0.052 | 1.8   | 0.545 | 1.467  | 0.142 | 0.994 | 3.258 |
| LRP6   | 0.563  | 0.302 | 1.863  | 0.063 | 1.756 | 0.531 | 1.424  | 0.154 | 0.971 | 3.176 |
| LRP5L  | 0.051  | 0.295 | 0.172  | 0.864 | 1.052 | 0.31  | 0.167  | 0.867 | 0.59  | 1.876 |
| LRP5   | 0.432  | 0.301 | 1.435  | 0.151 | 1.54  | 0.464 | 1.165  | 0.244 | 0.854 | 2.778 |
| LRP4   | -0.587 | 0.302 | -1.947 | 0.052 | 0.556 | 0.168 | -2.649 | 0.008 | 0.308 | 1.004 |
| LRP3   | 1.169  | 0.336 | 3.478  | 0.001 | 3.22  | 1.083 | 2.051  | 0.04  | 1.666 | 6.224 |
| LRP2BP | -0.055 | 0.296 | -0.185 | 0.853 | 0.947 | 0.28  | -0.19  | 0.849 | 0.53  | 1.69  |
| LRP2   | -0.308 | 0.3   | -1.026 | 0.305 | 0.735 | 0.221 | -1.201 | 0.23  | 0.408 | 1.324 |
| LRP1B  | 0.525  | 0.303 | 1.736  | 0.083 | 1.691 | 0.512 | 1.35   | 0.177 | 0.934 | 3.06  |
| LRP12  | 0.024  | 0.295 | 0.082  | 0.935 | 1.024 | 0.302 | 0.081  | 0.936 | 0.574 | 1.827 |
| LRP10  | -0.944 | 0.321 | -2.946 | 0.003 | 0.389 | 0.125 | -4.901 | 0     | 0.207 | 0.729 |
| LRP1   | -0.647 | 0.304 | -2.127 | 0.033 | 0.524 | 0.159 | -2.99  | 0.003 | 0.289 | 0.951 |
| LRIT1  | -0.14  | 0.299 | -0.47  | 0.638 | 0.869 | 0.26  | -0.505 | 0.614 | 0.484 | 1.561 |
| LRIG2  | 0.558  | 0.302 | 1.844  | 0.065 | 1.746 | 0.528 | 1.413  | 0.158 | 0.965 | 3.159 |
| LRIG1  | -0.521 | 0.302 | -1.725 | 0.085 | 0.594 | 0.179 | -2.263 | 0.024 | 0.328 | 1.074 |
| LRIF1  | 0.088  | 0.296 | 0.299  | 0.765 | 1.092 | 0.323 | 0.286  | 0.775 | 0.612 | 1.95  |
| LRFN4  | -0.024 | 0.297 | -0.079 | 0.937 | 0.977 | 0.29  | -0.08  | 0.936 | 0.546 | 1.747 |
| LRFN3  | 0.224  | 0.297 | 0.755  | 0.45  | 1.252 | 0.372 | 0.676  | 0.499 | 0.699 | 2.241 |
| LRCH4  | -0.176 | 0.295 | -0.596 | 0.551 | 0.839 | 0.248 | -0.651 | 0.515 | 0.47  | 1.496 |
| LRCH3  | -0.242 | 0.297 | -0.816 | 0.415 | 0.785 | 0.233 | -0.923 | 0.356 | 0.439 | 1.404 |
| LRCH1  | 0.257  | 0.298 | 0.862  | 0.389 | 1.293 | 0.385 | 0.76   | 0.447 | 0.721 | 2.319 |
| LRBA   | -0.428 | 0.302 | -1.416 | 0.157 | 0.652 | 0.197 | -1.767 | 0.077 | 0.36  | 1.179 |
| LRAT   | -0.307 | 0.298 | -1.032 | 0.302 | 0.736 | 0.219 | -1.208 | 0.227 | 0.411 | 1.318 |
| LPXN   | -0.266 | 0.298 | -0.894 | 0.371 | 0.766 | 0.228 | -1.025 | 0.306 | 0.427 | 1.374 |
| LPP    | 0.187  | 0.296 | 0.633  | 0.527 | 1.206 | 0.357 | 0.577  | 0.564 | 0.675 | 2.155 |
| LPO    | -0.037 | 0.295 | -0.124 | 0.901 | 0.964 | 0.285 | -0.126 | 0.899 | 0.54  | 1.72  |

|              |        |       |        |       |       |       |        |       |       |       |
|--------------|--------|-------|--------|-------|-------|-------|--------|-------|-------|-------|
| LPL          | 0.661  | 0.31  | 2.135  | 0.033 | 1.938 | 0.6   | 1.562  | 0.118 | 1.056 | 3.556 |
| LPIN2        | -0.223 | 0.299 | -0.745 | 0.456 | 0.8   | 0.239 | -0.835 | 0.404 | 0.445 | 1.438 |
| LPIN1        | 0.013  | 0.295 | 0.045  | 0.964 | 1.013 | 0.299 | 0.045  | 0.964 | 0.568 | 1.807 |
| LPGAT1       | -0.037 | 0.295 | -0.124 | 0.901 | 0.964 | 0.284 | -0.127 | 0.899 | 0.541 | 1.718 |
| LPCAT4       | -0.095 | 0.296 | -0.32  | 0.749 | 0.91  | 0.269 | -0.336 | 0.737 | 0.509 | 1.624 |
| LPCAT3       | -1.048 | 0.328 | -3.195 | 0.001 | 0.351 | 0.115 | -5.647 | 0     | 0.184 | 0.667 |
| LPCAT1       | 0.687  | 0.306 | 2.247  | 0.025 | 1.989 | 0.608 | 1.625  | 0.104 | 1.092 | 3.622 |
| LPAR6        | -0.47  | 0.3   | -1.566 | 0.117 | 0.625 | 0.188 | -2     | 0.046 | 0.347 | 1.125 |
| LPAR4        | -0.166 | 0.296 | -0.559 | 0.576 | 0.847 | 0.251 | -0.608 | 0.543 | 0.474 | 1.515 |
| LPAR3        | -0.376 | 0.3   | -1.256 | 0.209 | 0.686 | 0.206 | -1.525 | 0.127 | 0.381 | 1.235 |
| LPAR2        | 0.37   | 0.3   | 1.234  | 0.217 | 1.448 | 0.435 | 1.031  | 0.302 | 0.804 | 2.608 |
| LPAR1        | -0.567 | 0.306 | -1.854 | 0.064 | 0.567 | 0.173 | -2.496 | 0.013 | 0.311 | 1.033 |
| LPAL2        | -0.246 | 0.296 | -0.83  | 0.406 | 0.782 | 0.232 | -0.941 | 0.347 | 0.438 | 1.397 |
| LPA          | -0.343 | 0.298 | -1.151 | 0.25  | 0.71  | 0.211 | -1.373 | 0.17  | 0.396 | 1.272 |
| LOXL2        | -0.2   | 0.296 | -0.675 | 0.499 | 0.819 | 0.242 | -0.748 | 0.455 | 0.459 | 1.462 |
| LOXL1        | -0.739 | 0.31  | -2.384 | 0.017 | 0.478 | 0.148 | -3.529 | 0     | 0.26  | 0.877 |
| LOX          | -0.364 | 0.298 | -1.222 | 0.222 | 0.695 | 0.207 | -1.474 | 0.141 | 0.388 | 1.246 |
| LORICRIN     | -0.139 | 0.296 | -0.47  | 0.638 | 0.87  | 0.258 | -0.505 | 0.614 | 0.487 | 1.555 |
| LONRF3       | -0.089 | 0.295 | -0.302 | 0.763 | 0.915 | 0.27  | -0.316 | 0.752 | 0.513 | 1.632 |
| LONRF1       | 0.183  | 0.296 | 0.618  | 0.537 | 1.201 | 0.356 | 0.564  | 0.573 | 0.672 | 2.146 |
| LONP1        | 0.147  | 0.297 | 0.493  | 0.622 | 1.158 | 0.344 | 0.458  | 0.647 | 0.646 | 2.074 |
| LOC79999     | -0.05  | 0.296 | -0.169 | 0.866 | 0.951 | 0.282 | -0.173 | 0.862 | 0.532 | 1.7   |
| LOC730101    | 0.222  | 0.296 | 0.75   | 0.454 | 1.249 | 0.37  | 0.672  | 0.501 | 0.699 | 2.231 |
| LOC728392    | -0.217 | 0.296 | -0.733 | 0.464 | 0.805 | 0.238 | -0.818 | 0.413 | 0.45  | 1.439 |
| LOC647070    | 0.504  | 0.302 | 1.667  | 0.095 | 1.656 | 0.501 | 1.31   | 0.19  | 0.915 | 2.995 |
| LOC51145     | 0.664  | 0.31  | 2.143  | 0.032 | 1.942 | 0.601 | 1.566  | 0.117 | 1.058 | 3.563 |
| LOC441666    | 0.172  | 0.296 | 0.582  | 0.56  | 1.188 | 0.351 | 0.535  | 0.593 | 0.666 | 2.12  |
| LOC441204    | -0.235 | 0.298 | -0.789 | 0.43  | 0.791 | 0.235 | -0.889 | 0.374 | 0.441 | 1.417 |
| LOC440792    | -0.202 | 0.297 | -0.681 | 0.496 | 0.817 | 0.242 | -0.754 | 0.451 | 0.457 | 1.461 |
| LOC389906    | 0.352  | 0.3   | 1.174  | 0.24  | 1.422 | 0.426 | 0.99   | 0.322 | 0.79  | 2.559 |
| LOC220077    | -0.543 | 0.302 | -1.796 | 0.073 | 0.581 | 0.176 | -2.385 | 0.017 | 0.321 | 1.051 |
| LOC202181    | -0.356 | 0.298 | -1.196 | 0.232 | 0.7   | 0.209 | -1.437 | 0.151 | 0.391 | 1.255 |
| LOC155060    | -0.465 | 0.301 | -1.542 | 0.123 | 0.628 | 0.189 | -1.962 | 0.05  | 0.348 | 1.134 |
| LOC103344931 | -0.138 | 0.295 | -0.468 | 0.64  | 0.871 | 0.257 | -0.502 | 0.616 | 0.488 | 1.554 |
| LOC101929550 | 0.16   | 0.3   | 0.534  | 0.593 | 1.174 | 0.352 | 0.493  | 0.622 | 0.652 | 2.114 |
| LOC101929148 | -0.644 | 0.306 | -2.104 | 0.035 | 0.525 | 0.161 | -2.954 | 0.003 | 0.288 | 0.957 |
| LOC101929073 | 0.106  | 0.296 | 0.357  | 0.721 | 1.112 | 0.329 | 0.339  | 0.735 | 0.622 | 1.987 |
| LOC101928278 | 0.616  | 0.31  | 1.989  | 0.047 | 1.851 | 0.573 | 1.485  | 0.138 | 1.009 | 3.397 |

|              |        |       |        |       |       |       |        |       |       |       |
|--------------|--------|-------|--------|-------|-------|-------|--------|-------|-------|-------|
| LOC101927770 | 0.442  | 0.3   | 1.476  | 0.14  | 1.556 | 0.466 | 1.193  | 0.233 | 0.865 | 2.8   |
| LOC101927610 | -0.111 | 0.295 | -0.375 | 0.708 | 0.895 | 0.264 | -0.396 | 0.692 | 0.502 | 1.597 |
| LOC101927550 | -0.18  | 0.296 | -0.609 | 0.543 | 0.835 | 0.247 | -0.667 | 0.505 | 0.468 | 1.491 |
| LOC101926913 | 0.311  | 0.298 | 1.047  | 0.295 | 1.365 | 0.406 | 0.899  | 0.368 | 0.762 | 2.446 |
| LOC100996756 | 0.032  | 0.296 | 0.108  | 0.914 | 1.033 | 0.305 | 0.107  | 0.915 | 0.578 | 1.843 |
| LOC100996325 | 0.198  | 0.297 | 0.667  | 0.505 | 1.219 | 0.362 | 0.605  | 0.545 | 0.681 | 2.182 |
| LOC100506282 | -0.034 | 0.295 | -0.114 | 0.909 | 0.967 | 0.286 | -0.116 | 0.908 | 0.542 | 1.725 |
| LOC100505915 | 0.327  | 0.3   | 1.093  | 0.274 | 1.387 | 0.416 | 0.932  | 0.351 | 0.771 | 2.496 |
| LOC100505498 | 0.091  | 0.296 | 0.307  | 0.759 | 1.095 | 0.324 | 0.293  | 0.769 | 0.613 | 1.955 |
| LOC100294145 | 0.135  | 0.296 | 0.457  | 0.648 | 1.145 | 0.339 | 0.427  | 0.669 | 0.641 | 2.044 |
| LOC100289518 | 0.587  | 0.303 | 1.94   | 0.052 | 1.799 | 0.545 | 1.467  | 0.142 | 0.994 | 3.257 |
| LOC100289473 | -0.003 | 0.296 | -0.011 | 0.991 | 0.997 | 0.295 | -0.011 | 0.991 | 0.558 | 1.779 |
| LOC100288570 | -0.119 | 0.295 | -0.401 | 0.688 | 0.888 | 0.262 | -0.426 | 0.67  | 0.498 | 1.585 |
| LOC100287387 | -0.618 | 0.303 | -2.036 | 0.042 | 0.539 | 0.164 | -2.818 | 0.005 | 0.297 | 0.977 |
| LOC100131532 | -0.203 | 0.296 | -0.684 | 0.494 | 0.817 | 0.242 | -0.758 | 0.448 | 0.457 | 1.459 |
| LOC100130449 | -0.031 | 0.296 | -0.106 | 0.915 | 0.969 | 0.286 | -0.108 | 0.914 | 0.543 | 1.73  |
| LOC100130331 | 0.256  | 0.298 | 0.859  | 0.39  | 1.291 | 0.384 | 0.758  | 0.448 | 0.721 | 2.315 |
| LOC100129503 | -0.005 | 0.295 | -0.015 | 0.988 | 0.995 | 0.294 | -0.016 | 0.988 | 0.558 | 1.775 |
| LNPEP        | 0.186  | 0.295 | 0.628  | 0.53  | 1.204 | 0.355 | 0.574  | 0.566 | 0.675 | 2.147 |
| LMX1B        | -0.131 | 0.298 | -0.438 | 0.662 | 0.878 | 0.262 | -0.467 | 0.64  | 0.489 | 1.575 |
| LMTK2        | 0.859  | 0.321 | 2.677  | 0.007 | 2.361 | 0.757 | 1.796  | 0.072 | 1.259 | 4.427 |
| LMOD1        | -0.452 | 0.3   | -1.508 | 0.132 | 0.636 | 0.191 | -1.907 | 0.057 | 0.354 | 1.145 |
| LMO7         | -0.227 | 0.296 | -0.767 | 0.443 | 0.797 | 0.236 | -0.861 | 0.389 | 0.446 | 1.424 |
| LMO4         | 0.463  | 0.302 | 1.529  | 0.126 | 1.588 | 0.48  | 1.224  | 0.221 | 0.878 | 2.874 |
| LMO3         | -0.017 | 0.295 | -0.059 | 0.953 | 0.983 | 0.29  | -0.059 | 0.953 | 0.551 | 1.753 |
| LMO2         | -0.735 | 0.31  | -2.372 | 0.018 | 0.479 | 0.149 | -3.503 | 0     | 0.261 | 0.88  |
| LMO1         | 0.246  | 0.296 | 0.831  | 0.406 | 1.279 | 0.379 | 0.737  | 0.461 | 0.716 | 2.288 |
| LMNB2        | 0.791  | 0.315 | 2.514  | 0.012 | 2.206 | 0.694 | 1.737  | 0.082 | 1.191 | 4.087 |
| LMNB1        | 0.301  | 0.298 | 1.013  | 0.311 | 1.352 | 0.402 | 0.874  | 0.382 | 0.754 | 2.422 |
| LMNA         | -0.182 | 0.296 | -0.615 | 0.539 | 0.834 | 0.246 | -0.675 | 0.5   | 0.467 | 1.488 |
| LMF2         | 0.14   | 0.297 | 0.47   | 0.638 | 1.15  | 0.341 | 0.439  | 0.661 | 0.643 | 2.056 |
| LMF1         | 0.326  | 0.298 | 1.095  | 0.273 | 1.386 | 0.413 | 0.935  | 0.35  | 0.773 | 2.483 |
| LMCD1        | -0.566 | 0.306 | -1.853 | 0.064 | 0.568 | 0.173 | -2.492 | 0.013 | 0.312 | 1.033 |
| LMBRD1       | -0.477 | 0.302 | -1.58  | 0.114 | 0.62  | 0.188 | -2.024 | 0.043 | 0.343 | 1.122 |
| LMBR1L       | -0.379 | 0.297 | -1.274 | 0.203 | 0.685 | 0.204 | -1.549 | 0.121 | 0.382 | 1.226 |
| LMAN2L       | -0.192 | 0.296 | -0.648 | 0.517 | 0.825 | 0.244 | -0.714 | 0.475 | 0.462 | 1.475 |
| LMAN2        | 0.188  | 0.296 | 0.635  | 0.526 | 1.207 | 0.358 | 0.578  | 0.563 | 0.675 | 2.158 |
| LMAN1L       | 0.215  | 0.296 | 0.725  | 0.468 | 1.239 | 0.367 | 0.652  | 0.514 | 0.694 | 2.214 |

|           |        |       |        |       |       |       |        |       |       |       |
|-----------|--------|-------|--------|-------|-------|-------|--------|-------|-------|-------|
| LMAN1     | -0.633 | 0.31  | -2.044 | 0.041 | 0.531 | 0.164 | -2.851 | 0.004 | 0.289 | 0.974 |
| LLPH      | -0.041 | 0.295 | -0.137 | 0.891 | 0.96  | 0.284 | -0.14  | 0.888 | 0.538 | 1.713 |
| LLGL2     | 0.335  | 0.298 | 1.127  | 0.26  | 1.399 | 0.416 | 0.958  | 0.338 | 0.781 | 2.506 |
| LLGL1     | 0.141  | 0.297 | 0.476  | 0.634 | 1.152 | 0.342 | 0.444  | 0.657 | 0.644 | 2.061 |
| LITAF     | -0.325 | 0.3   | -1.085 | 0.278 | 0.722 | 0.216 | -1.282 | 0.2   | 0.402 | 1.3   |
| LIPT1     | -0.651 | 0.31  | -2.098 | 0.036 | 0.522 | 0.162 | -2.956 | 0.003 | 0.284 | 0.958 |
| LIPG      | 0.073  | 0.297 | 0.246  | 0.805 | 1.076 | 0.32  | 0.238  | 0.812 | 0.601 | 1.927 |
| LIPF      | 0.065  | 0.295 | 0.221  | 0.825 | 1.067 | 0.315 | 0.214  | 0.831 | 0.598 | 1.903 |
| LIPE      | -0.292 | 0.298 | -0.979 | 0.328 | 0.747 | 0.222 | -1.137 | 0.256 | 0.417 | 1.339 |
| LIPC      | -0.303 | 0.298 | -1.018 | 0.309 | 0.739 | 0.22  | -1.188 | 0.235 | 0.412 | 1.324 |
| LIPA      | -0.243 | 0.298 | -0.817 | 0.414 | 0.784 | 0.233 | -0.925 | 0.355 | 0.438 | 1.405 |
| LINS1     | 0.007  | 0.296 | 0.023  | 0.982 | 1.007 | 0.298 | 0.023  | 0.982 | 0.564 | 1.797 |
| LINC02809 | -0.1   | 0.296 | -0.338 | 0.736 | 0.905 | 0.268 | -0.355 | 0.723 | 0.507 | 1.616 |
| LINC02249 | -0.356 | 0.299 | -1.192 | 0.233 | 0.7   | 0.209 | -1.432 | 0.152 | 0.39  | 1.258 |
| LINC02172 | -0.451 | 0.3   | -1.504 | 0.133 | 0.637 | 0.191 | -1.9   | 0.057 | 0.354 | 1.146 |
| LINC01963 | -0.552 | 0.306 | -1.805 | 0.071 | 0.576 | 0.176 | -2.409 | 0.016 | 0.316 | 1.048 |
| LINC01949 | 0.262  | 0.301 | 0.871  | 0.384 | 1.299 | 0.391 | 0.766  | 0.443 | 0.721 | 2.343 |
| LINC01711 | -0.146 | 0.295 | -0.495 | 0.62  | 0.864 | 0.255 | -0.533 | 0.594 | 0.484 | 1.541 |
| LINC01587 | -0.224 | 0.297 | -0.754 | 0.451 | 0.8   | 0.237 | -0.845 | 0.398 | 0.447 | 1.43  |
| LINC01565 | -0.049 | 0.295 | -0.166 | 0.868 | 0.952 | 0.281 | -0.17  | 0.865 | 0.534 | 1.698 |
| LINC01558 | 0.365  | 0.3   | 1.217  | 0.224 | 1.44  | 0.432 | 1.019  | 0.308 | 0.8   | 2.593 |
| LINC01482 | -0.284 | 0.3   | -0.949 | 0.343 | 0.752 | 0.226 | -1.098 | 0.272 | 0.418 | 1.354 |
| LINC01361 | 0.258  | 0.298 | 0.865  | 0.387 | 1.294 | 0.385 | 0.763  | 0.445 | 0.722 | 2.318 |
| LINC01278 | -0.008 | 0.296 | -0.027 | 0.978 | 0.992 | 0.293 | -0.027 | 0.978 | 0.556 | 1.771 |
| LINC01260 | -0.147 | 0.295 | -0.499 | 0.618 | 0.863 | 0.255 | -0.538 | 0.591 | 0.484 | 1.54  |
| LINC01140 | -0.036 | 0.295 | -0.124 | 0.902 | 0.964 | 0.285 | -0.126 | 0.9   | 0.541 | 1.719 |
| LINC01136 | 0.032  | 0.296 | 0.109  | 0.913 | 1.033 | 0.305 | 0.107  | 0.915 | 0.578 | 1.844 |
| LINC00965 | 0.106  | 0.295 | 0.358  | 0.72  | 1.111 | 0.328 | 0.34   | 0.734 | 0.623 | 1.983 |
| LINC00963 | -0.42  | 0.302 | -1.389 | 0.165 | 0.657 | 0.199 | -1.727 | 0.084 | 0.363 | 1.188 |
| LINC00939 | -0.224 | 0.296 | -0.757 | 0.449 | 0.799 | 0.237 | -0.848 | 0.396 | 0.447 | 1.429 |
| LINC00894 | 0.558  | 0.306 | 1.824  | 0.068 | 1.747 | 0.534 | 1.398  | 0.162 | 0.959 | 3.182 |
| LINC00837 | -0.384 | 0.3   | -1.283 | 0.199 | 0.681 | 0.204 | -1.565 | 0.118 | 0.379 | 1.225 |
| LINC00667 | -0.202 | 0.296 | -0.681 | 0.496 | 0.817 | 0.242 | -0.755 | 0.45  | 0.457 | 1.46  |
| LINC00663 | 0.033  | 0.296 | 0.113  | 0.91  | 1.034 | 0.306 | 0.111  | 0.911 | 0.579 | 1.846 |
| LINC00652 | -0.079 | 0.295 | -0.267 | 0.79  | 0.924 | 0.273 | -0.277 | 0.781 | 0.518 | 1.649 |
| LINC00597 | 0.385  | 0.3   | 1.285  | 0.199 | 1.47  | 0.44  | 1.066  | 0.286 | 0.817 | 2.644 |
| LINC00588 | -0.334 | 0.3   | -1.114 | 0.265 | 0.716 | 0.215 | -1.323 | 0.186 | 0.398 | 1.288 |
| LINC00574 | 0.436  | 0.299 | 1.459  | 0.144 | 1.546 | 0.462 | 1.183  | 0.237 | 0.861 | 2.776 |

|           |        |       |        |       |       |       |        |       |       |       |
|-----------|--------|-------|--------|-------|-------|-------|--------|-------|-------|-------|
| LINC00563 | -0.192 | 0.296 | -0.647 | 0.518 | 0.826 | 0.245 | -0.713 | 0.476 | 0.462 | 1.475 |
| LINC00474 | 0.438  | 0.302 | 1.448  | 0.148 | 1.549 | 0.468 | 1.173  | 0.241 | 0.857 | 2.802 |
| LINC00472 | -0.601 | 0.306 | -1.966 | 0.049 | 0.548 | 0.168 | -2.695 | 0.007 | 0.301 | 0.998 |
| LINC00342 | -0.156 | 0.296 | -0.528 | 0.597 | 0.855 | 0.253 | -0.572 | 0.568 | 0.479 | 1.528 |
| LINC00339 | 0.104  | 0.295 | 0.352  | 0.725 | 1.109 | 0.328 | 0.334  | 0.738 | 0.622 | 1.98  |
| LINC00328 | 0.493  | 0.3   | 1.64   | 0.101 | 1.637 | 0.492 | 1.295  | 0.195 | 0.908 | 2.949 |
| LINC00312 | -0.026 | 0.297 | -0.088 | 0.93  | 0.974 | 0.29  | -0.089 | 0.929 | 0.544 | 1.745 |
| LINC00302 | 0.302  | 0.297 | 1.015  | 0.31  | 1.352 | 0.402 | 0.876  | 0.381 | 0.755 | 2.423 |
| LINC00260 | -0.268 | 0.298 | -0.899 | 0.369 | 0.765 | 0.228 | -1.031 | 0.303 | 0.427 | 1.371 |
| LINC00216 | 0.306  | 0.298 | 1.028  | 0.304 | 1.358 | 0.404 | 0.886  | 0.376 | 0.758 | 2.433 |
| LINC00115 | 0.06   | 0.295 | 0.203  | 0.839 | 1.062 | 0.313 | 0.197  | 0.844 | 0.596 | 1.893 |
| LIN7C     | 0.356  | 0.297 | 1.2    | 0.23  | 1.428 | 0.424 | 1.01   | 0.313 | 0.798 | 2.554 |
| LIN7B     | -0.198 | 0.298 | -0.664 | 0.507 | 0.821 | 0.244 | -0.734 | 0.463 | 0.458 | 1.471 |
| LIN7A     | 0.062  | 0.296 | 0.21   | 0.833 | 1.064 | 0.315 | 0.204  | 0.838 | 0.596 | 1.901 |
| LIN37     | 0.221  | 0.297 | 0.742  | 0.458 | 1.247 | 0.371 | 0.666  | 0.506 | 0.696 | 2.234 |
| LIN28A    | 0.095  | 0.295 | 0.32   | 0.749 | 1.099 | 0.325 | 0.306  | 0.76  | 0.616 | 1.961 |
| LIMS2     | -0.327 | 0.298 | -1.099 | 0.272 | 0.721 | 0.215 | -1.3   | 0.194 | 0.402 | 1.292 |
| LIMK2     | -0.038 | 0.295 | -0.13  | 0.896 | 0.962 | 0.284 | -0.133 | 0.894 | 0.54  | 1.716 |
| LIMK1     | -0.205 | 0.298 | -0.689 | 0.491 | 0.815 | 0.242 | -0.764 | 0.445 | 0.455 | 1.46  |
| LIME1     | 0.134  | 0.296 | 0.454  | 0.65  | 1.144 | 0.338 | 0.425  | 0.671 | 0.64  | 2.042 |
| LIMD2     | -0.278 | 0.298 | -0.933 | 0.351 | 0.757 | 0.226 | -1.076 | 0.282 | 0.422 | 1.358 |
| LIMD1     | 0.351  | 0.3   | 1.17   | 0.242 | 1.42  | 0.426 | 0.987  | 0.324 | 0.789 | 2.555 |
| LIMCH1    | -0.58  | 0.306 | -1.896 | 0.058 | 0.56  | 0.171 | -2.569 | 0.01  | 0.308 | 1.02  |
| LIMA1     | -0.854 | 0.312 | -2.739 | 0.006 | 0.426 | 0.133 | -4.326 | 0     | 0.231 | 0.784 |
| LIM2      | -0.031 | 0.296 | -0.103 | 0.918 | 0.97  | 0.288 | -0.105 | 0.916 | 0.542 | 1.734 |
| LILRP2    | -0.186 | 0.297 | -0.625 | 0.532 | 0.831 | 0.247 | -0.687 | 0.492 | 0.464 | 1.487 |
| LILRB5    | 0.267  | 0.298 | 0.895  | 0.371 | 1.306 | 0.389 | 0.785  | 0.432 | 0.728 | 2.343 |
| LILRB4    | -0.261 | 0.298 | -0.875 | 0.382 | 0.771 | 0.229 | -1     | 0.318 | 0.43  | 1.381 |
| LILRB3    | 0.762  | 0.307 | 2.478  | 0.013 | 2.142 | 0.659 | 1.734  | 0.083 | 1.173 | 3.914 |
| LILRB2    | -0.051 | 0.295 | -0.173 | 0.862 | 0.95  | 0.281 | -0.178 | 0.859 | 0.532 | 1.695 |
| LILRB1    | -0.318 | 0.298 | -1.068 | 0.285 | 0.728 | 0.217 | -1.257 | 0.209 | 0.406 | 1.304 |
| LILRA6    | -0.424 | 0.3   | -1.413 | 0.158 | 0.654 | 0.196 | -1.761 | 0.078 | 0.363 | 1.178 |
| LILRA5    | 0.683  | 0.31  | 2.206  | 0.027 | 1.98  | 0.613 | 1.598  | 0.11  | 1.079 | 3.632 |
| LILRA4    | 0.077  | 0.296 | 0.26   | 0.795 | 1.08  | 0.32  | 0.25   | 0.803 | 0.605 | 1.929 |
| LILRA3    | 0.135  | 0.296 | 0.455  | 0.649 | 1.144 | 0.338 | 0.426  | 0.67  | 0.641 | 2.043 |
| LILRA2    | -0.009 | 0.295 | -0.03  | 0.976 | 0.991 | 0.293 | -0.03  | 0.976 | 0.556 | 1.768 |
| LILRA1    | 0.05   | 0.296 | 0.168  | 0.867 | 1.051 | 0.311 | 0.164  | 0.87  | 0.588 | 1.878 |
| LIG4      | 0.478  | 0.301 | 1.591  | 0.112 | 1.613 | 0.485 | 1.265  | 0.206 | 0.895 | 2.907 |

|          |        |       |        |       |       |       |        |       |       |       |
|----------|--------|-------|--------|-------|-------|-------|--------|-------|-------|-------|
| LIG3     | -0.019 | 0.295 | -0.066 | 0.948 | 0.981 | 0.29  | -0.066 | 0.947 | 0.55  | 1.75  |
| LIG1     | 0.535  | 0.302 | 1.771  | 0.077 | 1.708 | 0.516 | 1.371  | 0.17  | 0.944 | 3.089 |
| LIFR     | 0.337  | 0.298 | 1.13   | 0.259 | 1.401 | 0.418 | 0.959  | 0.337 | 0.781 | 2.513 |
| LIF      | 0.241  | 0.296 | 0.814  | 0.416 | 1.273 | 0.377 | 0.723  | 0.47  | 0.712 | 2.274 |
| LIAS     | -0.355 | 0.3   | -1.185 | 0.236 | 0.701 | 0.21  | -1.423 | 0.155 | 0.39  | 1.261 |
| LHX6     | -0.248 | 0.296 | -0.838 | 0.402 | 0.78  | 0.231 | -0.951 | 0.342 | 0.436 | 1.395 |
| LHX5     | 0.514  | 0.3   | 1.711  | 0.087 | 1.671 | 0.502 | 1.338  | 0.181 | 0.928 | 3.01  |
| LHX3     | 0.083  | 0.298 | 0.278  | 0.781 | 1.086 | 0.324 | 0.267  | 0.789 | 0.606 | 1.948 |
| LHX2     | 0.139  | 0.295 | 0.469  | 0.639 | 1.149 | 0.339 | 0.438  | 0.661 | 0.644 | 2.049 |
| LHX1     | 0.691  | 0.306 | 2.261  | 0.024 | 1.996 | 0.61  | 1.632  | 0.103 | 1.096 | 3.634 |
| LHPP     | -0.272 | 0.298 | -0.915 | 0.36  | 0.762 | 0.227 | -1.052 | 0.293 | 0.425 | 1.365 |
| LHFPL6   | -0.733 | 0.31  | -2.365 | 0.018 | 0.481 | 0.149 | -3.488 | 0     | 0.262 | 0.882 |
| LHFPL2   | 0.04   | 0.296 | 0.134  | 0.894 | 1.04  | 0.308 | 0.131  | 0.896 | 0.582 | 1.859 |
| LHCGR    | 0.384  | 0.298 | 1.289  | 0.197 | 1.468 | 0.437 | 1.071  | 0.284 | 0.819 | 2.629 |
| LGSN     | 0.571  | 0.304 | 1.881  | 0.06  | 1.77  | 0.537 | 1.433  | 0.152 | 0.976 | 3.209 |
| LGR5     | -0.106 | 0.295 | -0.358 | 0.72  | 0.9   | 0.266 | -0.378 | 0.705 | 0.504 | 1.605 |
| LGR4     | 0.412  | 0.303 | 1.36   | 0.174 | 1.509 | 0.457 | 1.115  | 0.265 | 0.834 | 2.731 |
| LGMN     | 0.44   | 0.302 | 1.457  | 0.145 | 1.553 | 0.47  | 1.178  | 0.239 | 0.859 | 2.809 |
| LG12     | 0.261  | 0.296 | 0.88   | 0.379 | 1.298 | 0.385 | 0.775  | 0.439 | 0.726 | 2.32  |
| LG11     | 0.15   | 0.297 | 0.506  | 0.613 | 1.162 | 0.345 | 0.47   | 0.638 | 0.65  | 2.079 |
| LGALSL   | 0.514  | 0.3   | 1.712  | 0.087 | 1.671 | 0.502 | 1.339  | 0.181 | 0.928 | 3.01  |
| LGALS9   | 0.047  | 0.295 | 0.16   | 0.873 | 1.048 | 0.31  | 0.156  | 0.876 | 0.588 | 1.87  |
| LGALS8   | -0.284 | 0.298 | -0.955 | 0.34  | 0.753 | 0.224 | -1.105 | 0.269 | 0.42  | 1.349 |
| LGALS4   | -0.198 | 0.297 | -0.667 | 0.505 | 0.82  | 0.244 | -0.738 | 0.46  | 0.458 | 1.468 |
| LGALS3BP | 0.399  | 0.3   | 1.328  | 0.184 | 1.49  | 0.448 | 1.095  | 0.274 | 0.827 | 2.685 |
| LGALS3   | 0.047  | 0.295 | 0.16   | 0.872 | 1.049 | 0.309 | 0.157  | 0.875 | 0.588 | 1.87  |
| LGALS2   | -0.16  | 0.296 | -0.541 | 0.589 | 0.852 | 0.252 | -0.586 | 0.558 | 0.477 | 1.523 |
| LGALS14  | 0.169  | 0.296 | 0.572  | 0.568 | 1.184 | 0.351 | 0.526  | 0.599 | 0.663 | 2.117 |
| LGALS13  | -0.304 | 0.298 | -1.02  | 0.308 | 0.738 | 0.22  | -1.192 | 0.233 | 0.412 | 1.323 |
| LGALS1   | 0.066  | 0.295 | 0.224  | 0.823 | 1.068 | 0.315 | 0.217  | 0.828 | 0.599 | 1.904 |
| LFNG     | 0.151  | 0.296 | 0.51   | 0.61  | 1.163 | 0.345 | 0.474  | 0.636 | 0.651 | 2.079 |
| LETMD1   | -0.453 | 0.3   | -1.51  | 0.131 | 0.636 | 0.191 | -1.911 | 0.056 | 0.353 | 1.144 |
| LETM1    | 0.369  | 0.298 | 1.237  | 0.216 | 1.446 | 0.431 | 1.034  | 0.301 | 0.806 | 2.593 |
| LEPROTL1 | -0.575 | 0.306 | -1.883 | 0.06  | 0.563 | 0.172 | -2.545 | 0.011 | 0.309 | 1.024 |
| LEPROT   | 0.142  | 0.297 | 0.479  | 0.632 | 1.153 | 0.343 | 0.447  | 0.655 | 0.644 | 2.065 |
| LEP      | 0.768  | 0.315 | 2.441  | 0.015 | 2.156 | 0.678 | 1.704  | 0.088 | 1.163 | 3.994 |
| LENEP    | -0.132 | 0.296 | -0.447 | 0.655 | 0.876 | 0.259 | -0.478 | 0.633 | 0.49  | 1.565 |
| LEMD3    | 0.348  | 0.298 | 1.169  | 0.242 | 1.416 | 0.421 | 0.987  | 0.323 | 0.79  | 2.537 |

|         |        |       |        |       |       |       |        |       |       |       |
|---------|--------|-------|--------|-------|-------|-------|--------|-------|-------|-------|
| LEFTY1  | 0.421  | 0.3   | 1.406  | 0.16  | 1.524 | 0.457 | 1.147  | 0.251 | 0.847 | 2.741 |
| LEF1    | -0.872 | 0.315 | -2.77  | 0.006 | 0.418 | 0.132 | -4.421 | 0     | 0.226 | 0.775 |
| LECT2   | 0.178  | 0.297 | 0.602  | 0.547 | 1.195 | 0.354 | 0.551  | 0.582 | 0.668 | 2.137 |
| LDOC1   | 0.654  | 0.31  | 2.109  | 0.035 | 1.923 | 0.596 | 1.548  | 0.122 | 1.047 | 3.529 |
| LDLRAP1 | -0.422 | 0.303 | -1.393 | 0.164 | 0.656 | 0.199 | -1.733 | 0.083 | 0.362 | 1.187 |
| LDLRAD4 | -0.086 | 0.297 | -0.288 | 0.773 | 0.918 | 0.273 | -0.301 | 0.763 | 0.513 | 1.644 |
| LDLR    | -0.17  | 0.296 | -0.575 | 0.565 | 0.843 | 0.25  | -0.627 | 0.531 | 0.472 | 1.507 |
| LDHC    | 0.046  | 0.295 | 0.156  | 0.876 | 1.047 | 0.309 | 0.152  | 0.879 | 0.587 | 1.867 |
| LDHB    | 0.044  | 0.295 | 0.149  | 0.882 | 1.045 | 0.308 | 0.145  | 0.884 | 0.586 | 1.863 |
| LDHAL6B | -0.082 | 0.296 | -0.277 | 0.782 | 0.921 | 0.272 | -0.289 | 0.773 | 0.516 | 1.645 |
| LDHA    | 0.167  | 0.295 | 0.565  | 0.572 | 1.182 | 0.349 | 0.52   | 0.603 | 0.662 | 2.108 |
| LDB3    | 0.168  | 0.297 | 0.567  | 0.571 | 1.183 | 0.351 | 0.522  | 0.602 | 0.661 | 2.117 |
| LDB2    | -0.828 | 0.315 | -2.628 | 0.009 | 0.437 | 0.138 | -4.088 | 0     | 0.236 | 0.81  |
| LDB1    | 0.361  | 0.3   | 1.204  | 0.228 | 1.435 | 0.43  | 1.011  | 0.312 | 0.797 | 2.582 |
| LDAH    | -0.272 | 0.298 | -0.913 | 0.361 | 0.762 | 0.227 | -1.049 | 0.294 | 0.425 | 1.366 |
| LCT     | 0.654  | 0.31  | 2.111  | 0.035 | 1.923 | 0.596 | 1.55   | 0.121 | 1.048 | 3.529 |
| LCP2    | -0.577 | 0.306 | -1.886 | 0.059 | 0.562 | 0.172 | -2.552 | 0.011 | 0.308 | 1.023 |
| LCP1    | -0.227 | 0.297 | -0.766 | 0.444 | 0.797 | 0.236 | -0.86  | 0.39  | 0.446 | 1.425 |
| LCN2    | -0.063 | 0.296 | -0.212 | 0.832 | 0.939 | 0.278 | -0.219 | 0.827 | 0.525 | 1.679 |
| LCN1    | -0.016 | 0.295 | -0.053 | 0.957 | 0.984 | 0.291 | -0.054 | 0.957 | 0.552 | 1.756 |
| LCMT2   | -0.198 | 0.296 | -0.669 | 0.504 | 0.82  | 0.243 | -0.74  | 0.46  | 0.459 | 1.466 |
| LCMT1   | 0.1    | 0.296 | 0.338  | 0.735 | 1.105 | 0.327 | 0.322  | 0.748 | 0.619 | 1.974 |
| LCK     | -0.021 | 0.296 | -0.07  | 0.944 | 0.98  | 0.29  | -0.071 | 0.944 | 0.549 | 1.749 |
| LCE2B   | -0.239 | 0.297 | -0.806 | 0.42  | 0.787 | 0.234 | -0.91  | 0.363 | 0.44  | 1.409 |
| LCAT    | -0.684 | 0.311 | -2.202 | 0.028 | 0.505 | 0.157 | -3.16  | 0.002 | 0.275 | 0.928 |
| LBX1    | 0.333  | 0.3   | 1.11   | 0.267 | 1.395 | 0.418 | 0.944  | 0.345 | 0.775 | 2.511 |
| LBR     | -0.218 | 0.297 | -0.734 | 0.463 | 0.804 | 0.239 | -0.82  | 0.412 | 0.45  | 1.438 |
| LBP     | 0.278  | 0.301 | 0.923  | 0.356 | 1.32  | 0.397 | 0.806  | 0.42  | 0.732 | 2.381 |
| LBH     | -0.88  | 0.312 | -2.818 | 0.005 | 0.415 | 0.13  | -4.516 | 0     | 0.225 | 0.765 |
| LAX1    | -0.43  | 0.299 | -1.439 | 0.15  | 0.65  | 0.194 | -1.797 | 0.072 | 0.362 | 1.169 |
| LATS1   | 0.408  | 0.3   | 1.362  | 0.173 | 1.504 | 0.451 | 1.118  | 0.263 | 0.836 | 2.705 |
| LAT2    | -0.781 | 0.315 | -2.482 | 0.013 | 0.458 | 0.144 | -3.762 | 0     | 0.247 | 0.848 |
| LAT     | -0.253 | 0.296 | -0.855 | 0.393 | 0.776 | 0.23  | -0.973 | 0.33  | 0.434 | 1.387 |
| LASP1   | 0.108  | 0.295 | 0.364  | 0.716 | 1.114 | 0.329 | 0.345  | 0.73  | 0.624 | 1.987 |
| LAS1L   | 0.684  | 0.306 | 2.236  | 0.025 | 1.981 | 0.606 | 1.62   | 0.105 | 1.088 | 3.608 |
| LARS2   | 0.765  | 0.307 | 2.494  | 0.013 | 2.149 | 0.66  | 1.743  | 0.081 | 1.178 | 3.922 |
| LARS1   | 0.128  | 0.298 | 0.429  | 0.668 | 1.136 | 0.339 | 0.403  | 0.687 | 0.634 | 2.038 |
| LARP7   | 0.215  | 0.297 | 0.725  | 0.468 | 1.24  | 0.368 | 0.653  | 0.514 | 0.693 | 2.219 |



|         |        |       |        |       |       |       |        |       |       |       |
|---------|--------|-------|--------|-------|-------|-------|--------|-------|-------|-------|
| LARP6   | -0.118 | 0.295 | -0.401 | 0.689 | 0.888 | 0.262 | -0.425 | 0.671 | 0.498 | 1.585 |
| LARP4B  | 1.115  | 0.336 | 3.317  | 0.001 | 3.049 | 1.025 | 2      | 0.046 | 1.578 | 5.892 |
| LARP4   | -0.423 | 0.302 | -1.399 | 0.162 | 0.655 | 0.198 | -1.741 | 0.082 | 0.362 | 1.185 |
| LARP1   | 0.353  | 0.3   | 1.174  | 0.24  | 1.423 | 0.427 | 0.989  | 0.323 | 0.79  | 2.563 |
| LARGE1  | 0.202  | 0.296 | 0.682  | 0.495 | 1.224 | 0.363 | 0.618  | 0.537 | 0.685 | 2.187 |
| LAPTM5  | 0.011  | 0.295 | 0.039  | 0.969 | 1.011 | 0.299 | 0.039  | 0.969 | 0.567 | 1.804 |
| LAPTM4B | 1.027  | 0.328 | 3.134  | 0.002 | 2.792 | 0.915 | 1.959  | 0.05  | 1.469 | 5.307 |
| LAPTM4A | 0.098  | 0.296 | 0.331  | 0.741 | 1.103 | 0.326 | 0.315  | 0.753 | 0.618 | 1.968 |
| LAP3    | 0.498  | 0.303 | 1.646  | 0.1   | 1.646 | 0.498 | 1.297  | 0.195 | 0.909 | 2.978 |
| LANCL2  | 0.515  | 0.3   | 1.717  | 0.086 | 1.674 | 0.502 | 1.342  | 0.18  | 0.93  | 3.014 |
| LANCL1  | -0.2   | 0.298 | -0.673 | 0.501 | 0.818 | 0.244 | -0.745 | 0.456 | 0.457 | 1.467 |
| LAMTOR5 | 0.585  | 0.303 | 1.931  | 0.053 | 1.795 | 0.544 | 1.462  | 0.144 | 0.991 | 3.25  |
| LAMTOR3 | 0.037  | 0.297 | 0.125  | 0.901 | 1.038 | 0.308 | 0.122  | 0.903 | 0.58  | 1.857 |
| LAMTOR2 | 0.374  | 0.299 | 1.25   | 0.211 | 1.453 | 0.434 | 1.043  | 0.297 | 0.809 | 2.609 |
| LAMP5   | -1.048 | 0.321 | -3.263 | 0.001 | 0.351 | 0.113 | -5.765 | 0     | 0.187 | 0.658 |
| LAMP3   | 0.362  | 0.3   | 1.207  | 0.227 | 1.436 | 0.43  | 1.013  | 0.311 | 0.798 | 2.584 |
| LAMP2   | 0.493  | 0.3   | 1.645  | 0.1   | 1.638 | 0.491 | 1.298  | 0.194 | 0.91  | 2.948 |
| LAMP1   | 0.782  | 0.31  | 2.523  | 0.012 | 2.187 | 0.678 | 1.75   | 0.08  | 1.191 | 4.015 |
| LAMC3   | 0.404  | 0.3   | 1.348  | 0.178 | 1.498 | 0.449 | 1.109  | 0.267 | 0.832 | 2.696 |
| LAMC2   | -0.006 | 0.295 | -0.022 | 0.983 | 0.994 | 0.293 | -0.022 | 0.983 | 0.557 | 1.772 |
| LAMC1   | -0.727 | 0.307 | -2.37  | 0.018 | 0.483 | 0.148 | -3.484 | 0     | 0.265 | 0.882 |
| LAMB4   | 0.596  | 0.306 | 1.947  | 0.051 | 1.814 | 0.555 | 1.467  | 0.142 | 0.996 | 3.304 |
| LAMB3   | -0.389 | 0.3   | -1.299 | 0.194 | 0.678 | 0.203 | -1.588 | 0.112 | 0.377 | 1.219 |
| LAMB2   | -0.487 | 0.302 | -1.613 | 0.107 | 0.614 | 0.186 | -2.079 | 0.038 | 0.34  | 1.111 |
| LAMB1   | -0.414 | 0.298 | -1.388 | 0.165 | 0.661 | 0.197 | -1.719 | 0.086 | 0.369 | 1.186 |
| LAMA5   | 0.071  | 0.297 | 0.239  | 0.811 | 1.074 | 0.319 | 0.23   | 0.818 | 0.599 | 1.923 |
| LAMA4   | -0.226 | 0.296 | -0.763 | 0.446 | 0.798 | 0.236 | -0.856 | 0.392 | 0.447 | 1.425 |
| LAMA3   | -0.452 | 0.302 | -1.494 | 0.135 | 0.637 | 0.193 | -1.888 | 0.059 | 0.352 | 1.152 |
| LAMA2   | -0.806 | 0.31  | -2.598 | 0.009 | 0.447 | 0.139 | -3.994 | 0     | 0.243 | 0.82  |
| LAMA1   | 0.265  | 0.296 | 0.895  | 0.371 | 1.304 | 0.386 | 0.786  | 0.432 | 0.729 | 2.331 |
| LALBA   | -0.686 | 0.31  | -2.216 | 0.027 | 0.503 | 0.156 | -3.184 | 0.001 | 0.274 | 0.924 |
| LAIR2   | 0      | 0.296 | -0.001 | 0.999 | 1     | 0.295 | -0.001 | 0.999 | 0.56  | 1.784 |
| LAIR1   | -0.053 | 0.296 | -0.181 | 0.857 | 0.948 | 0.281 | -0.186 | 0.853 | 0.531 | 1.694 |
| LAGE3   | 0.62   | 0.306 | 2.03   | 0.042 | 1.86  | 0.568 | 1.513  | 0.13  | 1.022 | 3.385 |
| LAG3    | 0.091  | 0.297 | 0.306  | 0.76  | 1.095 | 0.326 | 0.292  | 0.77  | 0.611 | 1.962 |
| LAD1    | 0.441  | 0.306 | 1.438  | 0.15  | 1.554 | 0.476 | 1.163  | 0.245 | 0.852 | 2.833 |
| LACTB2  | -0.073 | 0.296 | -0.246 | 0.806 | 0.93  | 0.275 | -0.255 | 0.799 | 0.521 | 1.659 |
| L3MBTL1 | 0.524  | 0.302 | 1.731  | 0.083 | 1.688 | 0.511 | 1.348  | 0.178 | 0.933 | 3.054 |

|          |        |       |        |       |       |       |        |       |       |       |
|----------|--------|-------|--------|-------|-------|-------|--------|-------|-------|-------|
| L2HGDH   | 0.173  | 0.297 | 0.584  | 0.56  | 1.189 | 0.353 | 0.536  | 0.592 | 0.665 | 2.127 |
| L1TD1    | 0.238  | 0.296 | 0.805  | 0.421 | 1.269 | 0.376 | 0.716  | 0.474 | 0.71  | 2.268 |
| L1CAM    | 0.142  | 0.296 | 0.479  | 0.632 | 1.153 | 0.342 | 0.447  | 0.655 | 0.645 | 2.06  |
| KYNU     | -0.08  | 0.296 | -0.27  | 0.788 | 0.923 | 0.273 | -0.281 | 0.779 | 0.517 | 1.65  |
| KYAT3    | -0.682 | 0.316 | -2.161 | 0.031 | 0.506 | 0.16  | -3.099 | 0.002 | 0.272 | 0.938 |
| KYAT1    | -0.312 | 0.298 | -1.047 | 0.295 | 0.732 | 0.218 | -1.229 | 0.219 | 0.408 | 1.313 |
| KXD1     | -0.139 | 0.296 | -0.468 | 0.64  | 0.87  | 0.258 | -0.502 | 0.616 | 0.487 | 1.556 |
| KTN1     | -0.286 | 0.3   | -0.954 | 0.34  | 0.751 | 0.225 | -1.105 | 0.269 | 0.417 | 1.352 |
| KSR1     | -0.224 | 0.296 | -0.755 | 0.45  | 0.8   | 0.237 | -0.847 | 0.397 | 0.447 | 1.429 |
| KRTAP9-9 | 0.269  | 0.297 | 0.908  | 0.364 | 1.309 | 0.388 | 0.796  | 0.426 | 0.732 | 2.341 |
| KRTAP5-9 | 0.098  | 0.296 | 0.331  | 0.741 | 1.103 | 0.327 | 0.315  | 0.753 | 0.617 | 1.972 |
| KRTAP5-8 | -0.742 | 0.31  | -2.391 | 0.017 | 0.476 | 0.148 | -3.545 | 0     | 0.259 | 0.875 |
| KRTAP4-7 | -0.098 | 0.295 | -0.33  | 0.741 | 0.907 | 0.268 | -0.347 | 0.729 | 0.508 | 1.618 |
| KRTAP1-3 | 0.217  | 0.296 | 0.731  | 0.465 | 1.242 | 0.368 | 0.657  | 0.511 | 0.695 | 2.22  |
| KRTAP1-1 | 0.001  | 0.295 | 0.005  | 0.996 | 1.001 | 0.295 | 0.005  | 0.996 | 0.562 | 1.785 |
| KRT9     | 0.447  | 0.303 | 1.479  | 0.139 | 1.564 | 0.473 | 1.192  | 0.233 | 0.864 | 2.83  |
| KRT8P12  | 0.666  | 0.306 | 2.177  | 0.029 | 1.946 | 0.595 | 1.59   | 0.112 | 1.069 | 3.543 |
| KRT86    | 0.058  | 0.295 | 0.198  | 0.843 | 1.06  | 0.313 | 0.192  | 0.848 | 0.594 | 1.891 |
| KRT85    | -0.311 | 0.298 | -1.045 | 0.296 | 0.733 | 0.218 | -1.226 | 0.22  | 0.409 | 1.313 |
| KRT84    | -0.175 | 0.296 | -0.591 | 0.554 | 0.84  | 0.248 | -0.646 | 0.518 | 0.47  | 1.499 |
| KRT83    | 0.176  | 0.295 | 0.595  | 0.552 | 1.192 | 0.352 | 0.546  | 0.585 | 0.668 | 2.127 |
| KRT81    | 0.285  | 0.297 | 0.961  | 0.336 | 1.33  | 0.395 | 0.836  | 0.403 | 0.743 | 2.381 |
| KRT8     | 0.417  | 0.3   | 1.392  | 0.164 | 1.518 | 0.455 | 1.138  | 0.255 | 0.843 | 2.731 |
| KRT76    | 0.014  | 0.295 | 0.048  | 0.962 | 1.014 | 0.299 | 0.048  | 0.962 | 0.569 | 1.808 |
| KRT75    | 0.222  | 0.296 | 0.749  | 0.454 | 1.248 | 0.37  | 0.672  | 0.502 | 0.699 | 2.231 |
| KRT7     | 0.05   | 0.297 | 0.168  | 0.867 | 1.051 | 0.312 | 0.164  | 0.87  | 0.588 | 1.88  |
| KRT6B    | -0.112 | 0.295 | -0.381 | 0.703 | 0.894 | 0.264 | -0.403 | 0.687 | 0.501 | 1.594 |
| KRT6A    | -0.237 | 0.297 | -0.799 | 0.425 | 0.789 | 0.234 | -0.901 | 0.367 | 0.441 | 1.412 |
| KRT5     | 0.012  | 0.296 | 0.04   | 0.968 | 1.012 | 0.299 | 0.04   | 0.968 | 0.567 | 1.806 |
| KRT4     | 0.329  | 0.3   | 1.097  | 0.272 | 1.389 | 0.416 | 0.935  | 0.35  | 0.772 | 2.5   |
| KRT38    | -0.356 | 0.298 | -1.195 | 0.232 | 0.7   | 0.209 | -1.435 | 0.151 | 0.39  | 1.256 |
| KRT37    | 0.025  | 0.296 | 0.085  | 0.932 | 1.026 | 0.303 | 0.084  | 0.933 | 0.574 | 1.831 |
| KRT36    | -0.327 | 0.299 | -1.097 | 0.273 | 0.721 | 0.215 | -1.298 | 0.194 | 0.401 | 1.294 |
| KRT35    | 0.384  | 0.3   | 1.282  | 0.2   | 1.468 | 0.44  | 1.065  | 0.287 | 0.816 | 2.642 |
| KRT33B   | 0.117  | 0.295 | 0.396  | 0.692 | 1.124 | 0.332 | 0.373  | 0.709 | 0.63  | 2.005 |
| KRT33A   | -0.152 | 0.296 | -0.514 | 0.607 | 0.859 | 0.254 | -0.555 | 0.579 | 0.481 | 1.534 |
| KRT32    | -0.076 | 0.296 | -0.257 | 0.798 | 0.927 | 0.274 | -0.267 | 0.79  | 0.519 | 1.655 |
| KRT31    | 0.087  | 0.295 | 0.296  | 0.767 | 1.091 | 0.322 | 0.284  | 0.777 | 0.612 | 1.946 |

|         |        |       |        |       |       |       |        |       |       |       |
|---------|--------|-------|--------|-------|-------|-------|--------|-------|-------|-------|
| KRT3    | 0.524  | 0.302 | 1.734  | 0.083 | 1.689 | 0.511 | 1.35   | 0.177 | 0.934 | 3.055 |
| KRT24   | 0.204  | 0.296 | 0.687  | 0.492 | 1.226 | 0.363 | 0.622  | 0.534 | 0.686 | 2.191 |
| KRT23   | 0.42   | 0.3   | 1.402  | 0.161 | 1.522 | 0.456 | 1.145  | 0.252 | 0.846 | 2.738 |
| KRT20   | 0.402  | 0.3   | 1.341  | 0.18  | 1.495 | 0.448 | 1.105  | 0.269 | 0.831 | 2.69  |
| KRT2    | -0.279 | 0.299 | -0.934 | 0.35  | 0.756 | 0.226 | -1.078 | 0.281 | 0.421 | 1.359 |
| KRT19P2 | 0.334  | 0.298 | 1.12   | 0.263 | 1.397 | 0.417 | 0.952  | 0.341 | 0.778 | 2.507 |
| KRT19   | 0.275  | 0.296 | 0.926  | 0.354 | 1.316 | 0.39  | 0.81   | 0.418 | 0.736 | 2.352 |
| KRT18   | 0.289  | 0.296 | 0.975  | 0.33  | 1.335 | 0.396 | 0.847  | 0.397 | 0.747 | 2.386 |
| KRT16   | 0.074  | 0.295 | 0.251  | 0.802 | 1.077 | 0.318 | 0.242  | 0.809 | 0.604 | 1.921 |
| KRT15   | -0.042 | 0.295 | -0.144 | 0.886 | 0.958 | 0.283 | -0.147 | 0.883 | 0.537 | 1.71  |
| KRT14   | 0.089  | 0.295 | 0.301  | 0.763 | 1.093 | 0.323 | 0.288  | 0.773 | 0.613 | 1.95  |
| KRT13   | 0.116  | 0.295 | 0.393  | 0.694 | 1.123 | 0.332 | 0.371  | 0.711 | 0.63  | 2.003 |
| KRT12   | 0.154  | 0.296 | 0.521  | 0.603 | 1.166 | 0.345 | 0.483  | 0.629 | 0.654 | 2.082 |
| KRT10   | 0.485  | 0.3   | 1.615  | 0.106 | 1.623 | 0.487 | 1.28   | 0.201 | 0.902 | 2.924 |
| KRT1    | 0.219  | 0.296 | 0.738  | 0.46  | 1.244 | 0.369 | 0.663  | 0.507 | 0.696 | 2.224 |
| KRR1    | 0.322  | 0.298 | 1.08   | 0.28  | 1.38  | 0.412 | 0.924  | 0.356 | 0.769 | 2.477 |
| KRIT1   | 0.033  | 0.295 | 0.112  | 0.911 | 1.034 | 0.305 | 0.11   | 0.912 | 0.58  | 1.843 |
| KRI1    | -0.212 | 0.296 | -0.715 | 0.475 | 0.809 | 0.24  | -0.796 | 0.426 | 0.453 | 1.446 |
| KREMEN2 | 0.089  | 0.295 | 0.301  | 0.763 | 1.093 | 0.323 | 0.288  | 0.773 | 0.613 | 1.949 |
| KRCC1   | -0.01  | 0.296 | -0.034 | 0.973 | 0.99  | 0.293 | -0.035 | 0.972 | 0.554 | 1.768 |
| KRBOX4  | 0.188  | 0.297 | 0.634  | 0.526 | 1.207 | 0.358 | 0.578  | 0.564 | 0.675 | 2.159 |
| KRAS    | 0.306  | 0.296 | 1.034  | 0.301 | 1.358 | 0.403 | 0.89   | 0.373 | 0.76  | 2.428 |
| KPTN    | 0.65   | 0.311 | 2.088  | 0.037 | 1.916 | 0.596 | 1.535  | 0.125 | 1.041 | 3.526 |
| KPNB1   | 0.54   | 0.302 | 1.787  | 0.074 | 1.716 | 0.519 | 1.381  | 0.167 | 0.949 | 3.104 |
| KPNA6   | -0.146 | 0.296 | -0.494 | 0.621 | 0.864 | 0.256 | -0.533 | 0.594 | 0.483 | 1.544 |
| KPNA5   | -0.259 | 0.298 | -0.87  | 0.384 | 0.772 | 0.23  | -0.993 | 0.321 | 0.43  | 1.384 |
| KPNA4   | 0.38   | 0.3   | 1.267  | 0.205 | 1.462 | 0.438 | 1.054  | 0.292 | 0.812 | 2.631 |
| KPNA3   | 0.142  | 0.296 | 0.48   | 0.631 | 1.152 | 0.341 | 0.447  | 0.655 | 0.645 | 2.058 |
| KPNA2   | 0.349  | 0.298 | 1.171  | 0.242 | 1.417 | 0.422 | 0.988  | 0.323 | 0.79  | 2.541 |
| KPNA1   | 0.581  | 0.302 | 1.922  | 0.055 | 1.789 | 0.541 | 1.458  | 0.145 | 0.989 | 3.236 |
| KNTC1   | 0.25   | 0.298 | 0.839  | 0.402 | 1.284 | 0.383 | 0.742  | 0.458 | 0.716 | 2.304 |
| KNOP1   | -0.017 | 0.295 | -0.058 | 0.954 | 0.983 | 0.29  | -0.059 | 0.953 | 0.551 | 1.753 |
| KNL1    | -0.276 | 0.296 | -0.931 | 0.352 | 0.759 | 0.225 | -1.073 | 0.283 | 0.424 | 1.356 |
| KNG1    | -0.243 | 0.297 | -0.818 | 0.413 | 0.784 | 0.233 | -0.926 | 0.354 | 0.438 | 1.404 |
| KMT5B   | -0.015 | 0.295 | -0.052 | 0.959 | 0.985 | 0.291 | -0.052 | 0.958 | 0.552 | 1.756 |
| KMT5A   | -0.399 | 0.303 | -1.317 | 0.188 | 0.671 | 0.203 | -1.618 | 0.106 | 0.371 | 1.215 |
| KMT2D   | -0.29  | 0.297 | -0.977 | 0.329 | 0.748 | 0.222 | -1.133 | 0.257 | 0.418 | 1.339 |
| KMT2B   | 0.161  | 0.296 | 0.545  | 0.586 | 1.175 | 0.348 | 0.503  | 0.615 | 0.658 | 2.1   |

|        |        |       |        |       |       |       |         |       |       |       |
|--------|--------|-------|--------|-------|-------|-------|---------|-------|-------|-------|
| KMT2A  | -0.381 | 0.298 | -1.278 | 0.201 | 0.683 | 0.204 | -1.556  | 0.12  | 0.381 | 1.225 |
| KMO    | -0.417 | 0.3   | -1.391 | 0.164 | 0.659 | 0.198 | -1.726  | 0.084 | 0.366 | 1.186 |
| KLRG1  | 0.256  | 0.301 | 0.85   | 0.395 | 1.292 | 0.389 | 0.75    | 0.453 | 0.716 | 2.33  |
| KLRF1  | -0.553 | 0.303 | -1.826 | 0.068 | 0.575 | 0.174 | -2.438  | 0.015 | 0.318 | 1.041 |
| KLRD1  | -0.759 | 0.307 | -2.474 | 0.013 | 0.468 | 0.144 | -3.705  | 0     | 0.256 | 0.854 |
| KLRC4  | -0.266 | 0.298 | -0.892 | 0.373 | 0.767 | 0.228 | -1.021  | 0.307 | 0.428 | 1.375 |
| KLRC3  | -0.851 | 0.315 | -2.702 | 0.007 | 0.427 | 0.134 | -4.261  | 0     | 0.23  | 0.792 |
| KLRB1  | -1.66  | 0.372 | -4.456 | 0     | 0.19  | 0.071 | -11.431 | 0     | 0.092 | 0.395 |
| KLRA1P | -0.777 | 0.315 | -2.469 | 0.014 | 0.46  | 0.145 | -3.735  | 0     | 0.248 | 0.852 |
| KLKB1  | 0.042  | 0.295 | 0.143  | 0.886 | 1.043 | 0.308 | 0.14    | 0.889 | 0.585 | 1.861 |
| KLK8   | -0.244 | 0.296 | -0.824 | 0.41  | 0.783 | 0.232 | -0.933  | 0.351 | 0.438 | 1.4   |
| KLK7   | 0.252  | 0.298 | 0.846  | 0.397 | 1.286 | 0.383 | 0.748   | 0.454 | 0.718 | 2.305 |
| KLK6   | 0.18   | 0.296 | 0.608  | 0.543 | 1.197 | 0.354 | 0.556   | 0.578 | 0.67  | 2.139 |
| KLK5   | 0.33   | 0.3   | 1.1    | 0.271 | 1.39  | 0.417 | 0.937   | 0.349 | 0.773 | 2.501 |
| KLK3   | -0.512 | 0.302 | -1.693 | 0.09  | 0.599 | 0.181 | -2.211  | 0.027 | 0.331 | 1.084 |
| KLK2   | 0.132  | 0.295 | 0.448  | 0.654 | 1.141 | 0.337 | 0.42    | 0.675 | 0.64  | 2.037 |
| KLK15  | 0.547  | 0.302 | 1.81   | 0.07  | 1.729 | 0.523 | 1.394   | 0.163 | 0.956 | 3.127 |
| KLK14  | -0.395 | 0.3   | -1.314 | 0.189 | 0.674 | 0.202 | -1.611  | 0.107 | 0.374 | 1.214 |
| KLK13  | -0.184 | 0.296 | -0.622 | 0.534 | 0.832 | 0.247 | -0.683  | 0.495 | 0.465 | 1.487 |
| KLK12  | 0.015  | 0.296 | 0.05   | 0.96  | 1.015 | 0.3   | 0.049   | 0.961 | 0.568 | 1.811 |
| KLK11  | 0.013  | 0.297 | 0.044  | 0.965 | 1.013 | 0.301 | 0.044   | 0.965 | 0.566 | 1.813 |
| KLK10  | -0.124 | 0.296 | -0.42  | 0.675 | 0.883 | 0.262 | -0.447  | 0.655 | 0.494 | 1.578 |
| KLK1   | 0.089  | 0.297 | 0.299  | 0.765 | 1.093 | 0.324 | 0.286   | 0.775 | 0.611 | 1.955 |
| KLHL9  | -0.128 | 0.295 | -0.434 | 0.664 | 0.88  | 0.26  | -0.463  | 0.643 | 0.493 | 1.569 |
| KLHL7  | 0.679  | 0.306 | 2.221  | 0.026 | 1.972 | 0.603 | 1.612   | 0.107 | 1.083 | 3.589 |
| KLHL5  | 0.335  | 0.298 | 1.123  | 0.261 | 1.397 | 0.416 | 0.955   | 0.34  | 0.779 | 2.505 |
| KLHL41 | -0.147 | 0.296 | -0.496 | 0.62  | 0.863 | 0.256 | -0.535  | 0.593 | 0.483 | 1.543 |
| KLHL4  | 0.169  | 0.295 | 0.571  | 0.568 | 1.184 | 0.35  | 0.526   | 0.599 | 0.664 | 2.112 |
| KLHL36 | 0.566  | 0.306 | 1.853  | 0.064 | 1.762 | 0.538 | 1.415   | 0.157 | 0.968 | 3.206 |
| KLHL35 | 0.041  | 0.298 | 0.136  | 0.892 | 1.042 | 0.311 | 0.134   | 0.894 | 0.58  | 1.869 |
| KLHL3  | -0.557 | 0.302 | -1.842 | 0.065 | 0.573 | 0.173 | -2.465  | 0.014 | 0.317 | 1.036 |
| KLHL29 | 0.367  | 0.298 | 1.234  | 0.217 | 1.444 | 0.43  | 1.032   | 0.302 | 0.806 | 2.587 |
| KLHL28 | 0.209  | 0.296 | 0.706  | 0.48  | 1.232 | 0.365 | 0.637   | 0.524 | 0.69  | 2.203 |
| KLHL26 | -0.155 | 0.299 | -0.518 | 0.605 | 0.857 | 0.256 | -0.56   | 0.576 | 0.477 | 1.539 |
| KLHL25 | 0.392  | 0.298 | 1.317  | 0.188 | 1.48  | 0.441 | 1.089   | 0.276 | 0.826 | 2.654 |
| KLHL24 | 1.028  | 0.321 | 3.198  | 0.001 | 2.796 | 0.899 | 1.998   | 0.046 | 1.489 | 5.25  |
| KLHL22 | 0.348  | 0.298 | 1.169  | 0.242 | 1.416 | 0.422 | 0.987   | 0.323 | 0.79  | 2.538 |
| KLHL21 | -0.21  | 0.301 | -0.698 | 0.485 | 0.811 | 0.244 | -0.776  | 0.438 | 0.45  | 1.462 |

|          |        |       |        |       |       |       |        |       |       |       |
|----------|--------|-------|--------|-------|-------|-------|--------|-------|-------|-------|
| KLHL20   | 0.548  | 0.311 | 1.762  | 0.078 | 1.73  | 0.539 | 1.356  | 0.175 | 0.94  | 3.185 |
| KLHL2    | -0.141 | 0.295 | -0.476 | 0.634 | 0.869 | 0.257 | -0.511 | 0.609 | 0.487 | 1.55  |
| KLHL18   | -0.124 | 0.295 | -0.421 | 0.674 | 0.883 | 0.261 | -0.449 | 0.654 | 0.495 | 1.576 |
| KLHL12   | -0.391 | 0.3   | -1.306 | 0.191 | 0.676 | 0.203 | -1.599 | 0.11  | 0.376 | 1.216 |
| KLHL11   | 0.1    | 0.296 | 0.338  | 0.735 | 1.105 | 0.327 | 0.322  | 0.748 | 0.619 | 1.974 |
| KLHDC8A  | 0.573  | 0.306 | 1.875  | 0.061 | 1.774 | 0.542 | 1.427  | 0.153 | 0.974 | 3.229 |
| KLHDC4   | 0.306  | 0.297 | 1.029  | 0.303 | 1.357 | 0.403 | 0.887  | 0.375 | 0.759 | 2.428 |
| KLHDC3   | 0.056  | 0.296 | 0.188  | 0.851 | 1.057 | 0.313 | 0.183  | 0.855 | 0.592 | 1.888 |
| KLHDC2   | -0.504 | 0.302 | -1.666 | 0.096 | 0.604 | 0.183 | -2.166 | 0.03  | 0.334 | 1.093 |
| KLHDC10  | 0.047  | 0.295 | 0.159  | 0.873 | 1.048 | 0.309 | 0.156  | 0.876 | 0.588 | 1.869 |
| KLF9     | -0.014 | 0.295 | -0.048 | 0.962 | 0.986 | 0.291 | -0.048 | 0.962 | 0.553 | 1.758 |
| KLF8     | 0.189  | 0.296 | 0.639  | 0.523 | 1.208 | 0.358 | 0.582  | 0.56  | 0.676 | 2.159 |
| KLF7     | -0.008 | 0.296 | -0.025 | 0.98  | 0.993 | 0.294 | -0.025 | 0.98  | 0.555 | 1.774 |
| KLF6     | 0.316  | 0.297 | 1.063  | 0.288 | 1.371 | 0.408 | 0.911  | 0.362 | 0.766 | 2.456 |
| KLF5     | 0.361  | 0.3   | 1.206  | 0.228 | 1.435 | 0.43  | 1.012  | 0.311 | 0.798 | 2.582 |
| KLF4     | -0.509 | 0.302 | -1.683 | 0.092 | 0.601 | 0.182 | -2.193 | 0.028 | 0.333 | 1.087 |
| KLF3-AS1 | -0.258 | 0.296 | -0.874 | 0.382 | 0.772 | 0.228 | -0.997 | 0.319 | 0.433 | 1.379 |
| KLF3     | -0.646 | 0.306 | -2.11  | 0.035 | 0.524 | 0.16  | -2.966 | 0.003 | 0.288 | 0.955 |
| KLF2     | -0.136 | 0.297 | -0.457 | 0.647 | 0.873 | 0.259 | -0.49  | 0.624 | 0.488 | 1.562 |
| KLF15    | 0.448  | 0.302 | 1.483  | 0.138 | 1.566 | 0.473 | 1.195  | 0.232 | 0.866 | 2.832 |
| KLF13    | -0.104 | 0.3   | -0.348 | 0.728 | 0.901 | 0.27  | -0.367 | 0.714 | 0.501 | 1.621 |
| KLF12    | 0.124  | 0.297 | 0.417  | 0.676 | 1.132 | 0.336 | 0.393  | 0.695 | 0.632 | 2.026 |
| KLF11    | 0.035  | 0.295 | 0.118  | 0.906 | 1.035 | 0.306 | 0.116  | 0.908 | 0.581 | 1.846 |
| KLF10    | -0.337 | 0.298 | -1.132 | 0.258 | 0.714 | 0.213 | -1.346 | 0.178 | 0.398 | 1.28  |
| KLF1     | 0.75   | 0.31  | 2.421  | 0.015 | 2.118 | 0.657 | 1.703  | 0.089 | 1.154 | 3.888 |
| KLC2     | -0.043 | 0.296 | -0.144 | 0.885 | 0.958 | 0.284 | -0.148 | 0.883 | 0.537 | 1.711 |
| KLC1     | 0.146  | 0.296 | 0.492  | 0.622 | 1.157 | 0.343 | 0.458  | 0.647 | 0.647 | 2.068 |
| KL       | 0.05   | 0.297 | 0.168  | 0.867 | 1.051 | 0.312 | 0.163  | 0.87  | 0.588 | 1.879 |
| KIZ      | -0.549 | 0.306 | -1.795 | 0.073 | 0.578 | 0.177 | -2.391 | 0.017 | 0.317 | 1.052 |
| KITLG    | -0.359 | 0.3   | -1.197 | 0.231 | 0.699 | 0.209 | -1.44  | 0.15  | 0.388 | 1.257 |
| KIT      | -0.192 | 0.296 | -0.647 | 0.517 | 0.825 | 0.245 | -0.714 | 0.475 | 0.462 | 1.475 |
| KISS1    | 0.632  | 0.307 | 2.059  | 0.039 | 1.882 | 0.578 | 1.526  | 0.127 | 1.031 | 3.436 |
| KIRREL1  | 0.309  | 0.297 | 1.039  | 0.299 | 1.362 | 0.405 | 0.894  | 0.371 | 0.761 | 2.438 |
| KIR3DX1  | 0.114  | 0.296 | 0.384  | 0.701 | 1.12  | 0.332 | 0.363  | 0.717 | 0.627 | 2.003 |
| KIR3DS1  | 0.099  | 0.295 | 0.334  | 0.739 | 1.104 | 0.326 | 0.318  | 0.751 | 0.619 | 1.969 |
| KIR3DL3  | 0.224  | 0.296 | 0.756  | 0.449 | 1.251 | 0.371 | 0.678  | 0.498 | 0.7   | 2.237 |
| KIR3DL1  | -0.567 | 0.306 | -1.856 | 0.063 | 0.567 | 0.173 | -2.498 | 0.013 | 0.311 | 1.032 |
| KIR2DS5  | -0.349 | 0.3   | -1.165 | 0.244 | 0.705 | 0.211 | -1.394 | 0.163 | 0.392 | 1.269 |

|           |        |       |        |       |       |       |        |       |       |       |
|-----------|--------|-------|--------|-------|-------|-------|--------|-------|-------|-------|
| KIR2DS4   | -0.467 | 0.3   | -1.557 | 0.119 | 0.627 | 0.188 | -1.985 | 0.047 | 0.348 | 1.128 |
| KIR2DS3   | -0.196 | 0.296 | -0.661 | 0.509 | 0.822 | 0.243 | -0.73  | 0.465 | 0.46  | 1.469 |
| KIR2DS2   | 0.384  | 0.3   | 1.279  | 0.201 | 1.467 | 0.44  | 1.062  | 0.288 | 0.815 | 2.642 |
| KIR2DS1   | 0.473  | 0.302 | 1.564  | 0.118 | 1.605 | 0.485 | 1.246  | 0.213 | 0.887 | 2.903 |
| KIR2DL5A  | 0.096  | 0.297 | 0.324  | 0.746 | 1.101 | 0.327 | 0.309  | 0.758 | 0.615 | 1.969 |
| KIR2DL4   | -0.164 | 0.296 | -0.554 | 0.579 | 0.849 | 0.251 | -0.603 | 0.547 | 0.475 | 1.517 |
| KIR2DL3   | 0.27   | 0.298 | 0.907  | 0.364 | 1.31  | 0.39  | 0.795  | 0.427 | 0.731 | 2.348 |
| KIR2DL2   | -0.233 | 0.297 | -0.787 | 0.432 | 0.792 | 0.235 | -0.886 | 0.376 | 0.442 | 1.417 |
| KIR2DL1   | 0.254  | 0.298 | 0.852  | 0.394 | 1.289 | 0.384 | 0.753  | 0.452 | 0.719 | 2.309 |
| KIN       | 1.2    | 0.336 | 3.568  | 0     | 3.319 | 1.116 | 2.078  | 0.038 | 1.717 | 6.416 |
| KIFC3     | -0.5   | 0.301 | -1.663 | 0.096 | 0.607 | 0.182 | -2.157 | 0.031 | 0.337 | 1.094 |
| KIFC1     | 0.875  | 0.315 | 2.778  | 0.005 | 2.398 | 0.755 | 1.852  | 0.064 | 1.294 | 4.444 |
| KIFBP     | -0.139 | 0.299 | -0.465 | 0.642 | 0.87  | 0.26  | -0.498 | 0.618 | 0.484 | 1.564 |
| KIFAP3    | -0.388 | 0.303 | -1.28  | 0.2   | 0.679 | 0.206 | -1.564 | 0.118 | 0.375 | 1.229 |
| KIF5C     | -0.446 | 0.3   | -1.49  | 0.136 | 0.64  | 0.192 | -1.877 | 0.06  | 0.356 | 1.151 |
| KIF5B     | -0.02  | 0.295 | -0.066 | 0.947 | 0.981 | 0.289 | -0.067 | 0.947 | 0.55  | 1.748 |
| KIF5A     | 0.102  | 0.298 | 0.341  | 0.733 | 1.107 | 0.33  | 0.324  | 0.746 | 0.618 | 1.984 |
| KIF4A     | 0.342  | 0.298 | 1.149  | 0.251 | 1.408 | 0.42  | 0.973  | 0.331 | 0.785 | 2.526 |
| KIF3C     | 0.679  | 0.306 | 2.22   | 0.026 | 1.971 | 0.602 | 1.612  | 0.107 | 1.083 | 3.588 |
| KIF3B     | -0.349 | 0.298 | -1.172 | 0.241 | 0.705 | 0.21  | -1.402 | 0.161 | 0.393 | 1.265 |
| KIF3A     | 0.377  | 0.299 | 1.264  | 0.206 | 1.459 | 0.435 | 1.053  | 0.292 | 0.813 | 2.618 |
| KIF2C     | 0.516  | 0.303 | 1.705  | 0.088 | 1.675 | 0.507 | 1.332  | 0.183 | 0.926 | 3.03  |
| KIF2A     | -0.136 | 0.296 | -0.458 | 0.647 | 0.873 | 0.259 | -0.491 | 0.624 | 0.489 | 1.56  |
| KIF26B    | -0.512 | 0.306 | -1.672 | 0.094 | 0.599 | 0.183 | -2.184 | 0.029 | 0.329 | 1.092 |
| KIF25-AS1 | 0.686  | 0.304 | 2.258  | 0.024 | 1.985 | 0.603 | 1.634  | 0.102 | 1.095 | 3.6   |
| KIF25     | -0.576 | 0.31  | -1.859 | 0.063 | 0.562 | 0.174 | -2.513 | 0.012 | 0.306 | 1.032 |
| KIF24     | -0.557 | 0.301 | -1.849 | 0.064 | 0.573 | 0.172 | -2.474 | 0.013 | 0.318 | 1.034 |
| KIF23     | 0.456  | 0.298 | 1.53   | 0.126 | 1.578 | 0.47  | 1.228  | 0.219 | 0.88  | 2.83  |
| KIF22     | 0.587  | 0.304 | 1.933  | 0.053 | 1.798 | 0.546 | 1.462  | 0.144 | 0.992 | 3.261 |
| KIF21B    | -0.288 | 0.298 | -0.966 | 0.334 | 0.75  | 0.223 | -1.12  | 0.263 | 0.418 | 1.345 |
| KIF20B    | 0.288  | 0.298 | 0.967  | 0.334 | 1.333 | 0.397 | 0.84   | 0.401 | 0.744 | 2.389 |
| KIF20A    | 0.883  | 0.315 | 2.805  | 0.005 | 2.418 | 0.761 | 1.863  | 0.062 | 1.305 | 4.481 |
| KIF1C     | 0.43   | 0.3   | 1.432  | 0.152 | 1.537 | 0.462 | 1.164  | 0.245 | 0.853 | 2.769 |
| KIF1B     | -0.007 | 0.295 | -0.024 | 0.981 | 0.993 | 0.293 | -0.024 | 0.981 | 0.556 | 1.771 |
| KIF1A     | 0.355  | 0.298 | 1.192  | 0.233 | 1.426 | 0.425 | 1.003  | 0.316 | 0.796 | 2.557 |
| KIF18B    | 0.969  | 0.321 | 3.021  | 0.003 | 2.635 | 0.845 | 1.935  | 0.053 | 1.406 | 4.942 |
| KIF18A    | 0.885  | 0.321 | 2.757  | 0.006 | 2.422 | 0.777 | 1.83   | 0.067 | 1.292 | 4.543 |
| KIF17     | 0.074  | 0.296 | 0.252  | 0.801 | 1.077 | 0.318 | 0.243  | 0.808 | 0.604 | 1.923 |

|           |        |       |        |       |       |       |        |       |       |       |
|-----------|--------|-------|--------|-------|-------|-------|--------|-------|-------|-------|
| KIF16B    | -0.081 | 0.297 | -0.272 | 0.785 | 0.922 | 0.274 | -0.284 | 0.777 | 0.515 | 1.651 |
| KIF15     | 0.595  | 0.306 | 1.945  | 0.052 | 1.813 | 0.554 | 1.466  | 0.143 | 0.995 | 3.301 |
| KIF14     | 0.578  | 0.306 | 1.888  | 0.059 | 1.782 | 0.545 | 1.434  | 0.152 | 0.978 | 3.247 |
| KIF13B    | -0.609 | 0.31  | -1.963 | 0.05  | 0.544 | 0.169 | -2.703 | 0.007 | 0.296 | 0.999 |
| KIF13A    | -0.452 | 0.303 | -1.494 | 0.135 | 0.636 | 0.193 | -1.889 | 0.059 | 0.351 | 1.152 |
| KIF11     | 0.453  | 0.3   | 1.513  | 0.13  | 1.573 | 0.471 | 1.216  | 0.224 | 0.875 | 2.831 |
| KIDINS220 | -0.157 | 0.296 | -0.53  | 0.596 | 0.855 | 0.253 | -0.574 | 0.566 | 0.478 | 1.527 |
| KIAA1614  | 0.058  | 0.296 | 0.198  | 0.843 | 1.06  | 0.314 | 0.192  | 0.848 | 0.594 | 1.893 |
| KIAA1549L | 0.367  | 0.3   | 1.223  | 0.221 | 1.443 | 0.433 | 1.024  | 0.306 | 0.802 | 2.598 |
| KIAA1109  | -0.087 | 0.295 | -0.293 | 0.77  | 0.917 | 0.271 | -0.306 | 0.76  | 0.514 | 1.636 |
| KIAA0930  | -0.473 | 0.302 | -1.562 | 0.118 | 0.623 | 0.189 | -1.997 | 0.046 | 0.345 | 1.128 |
| KIAA0895  | 0.615  | 0.304 | 2.021  | 0.043 | 1.85  | 0.563 | 1.51   | 0.131 | 1.019 | 3.357 |
| KIAA0754  | -0.16  | 0.295 | -0.54  | 0.589 | 0.852 | 0.252 | -0.586 | 0.558 | 0.478 | 1.521 |
| KIAA0753  | -0.184 | 0.296 | -0.619 | 0.536 | 0.832 | 0.247 | -0.68  | 0.497 | 0.466 | 1.488 |
| KIAA0586  | 0.116  | 0.295 | 0.394  | 0.694 | 1.123 | 0.332 | 0.372  | 0.71  | 0.63  | 2.004 |
| KIAA0513  | 0.016  | 0.296 | 0.054  | 0.957 | 1.016 | 0.301 | 0.054  | 0.957 | 0.568 | 1.817 |
| KIAA0408  | 0.711  | 0.31  | 2.293  | 0.022 | 2.035 | 0.631 | 1.641  | 0.101 | 1.109 | 3.736 |
| KIAA0319L | -0.487 | 0.306 | -1.59  | 0.112 | 0.614 | 0.188 | -2.049 | 0.04  | 0.337 | 1.12  |
| KIAA0319  | -0.112 | 0.296 | -0.376 | 0.707 | 0.894 | 0.265 | -0.398 | 0.69  | 0.501 | 1.598 |
| KIAA0232  | 0.178  | 0.297 | 0.6    | 0.548 | 1.195 | 0.355 | 0.55   | 0.583 | 0.668 | 2.14  |
| KIAA0100  | -0.094 | 0.299 | -0.315 | 0.753 | 0.91  | 0.272 | -0.33  | 0.741 | 0.507 | 1.635 |
| KIAA0087  | -0.444 | 0.302 | -1.468 | 0.142 | 0.642 | 0.194 | -1.848 | 0.065 | 0.355 | 1.16  |
| KIAA0040  | -0.918 | 0.321 | -2.863 | 0.004 | 0.399 | 0.128 | -4.691 | 0     | 0.213 | 0.749 |
| KHSRP     | -0.411 | 0.299 | -1.371 | 0.17  | 0.663 | 0.199 | -1.696 | 0.09  | 0.369 | 1.193 |
| KHNYN     | 0.267  | 0.298 | 0.897  | 0.37  | 1.306 | 0.389 | 0.787  | 0.431 | 0.729 | 2.339 |
| KHK       | 0.215  | 0.296 | 0.727  | 0.467 | 1.24  | 0.367 | 0.654  | 0.513 | 0.694 | 2.216 |
| KHDRBS3   | 0.214  | 0.298 | 0.719  | 0.472 | 1.239 | 0.369 | 0.647  | 0.517 | 0.691 | 2.222 |
| KHDRBS2   | 0.501  | 0.302 | 1.657  | 0.098 | 1.65  | 0.499 | 1.303  | 0.193 | 0.912 | 2.984 |
| KHDRBS1   | 0.248  | 0.296 | 0.836  | 0.403 | 1.281 | 0.379 | 0.741  | 0.459 | 0.717 | 2.289 |
| KHDC4     | -0.009 | 0.296 | -0.029 | 0.977 | 0.991 | 0.294 | -0.03  | 0.976 | 0.555 | 1.771 |
| KERA      | -0.336 | 0.298 | -1.127 | 0.26  | 0.715 | 0.213 | -1.339 | 0.18  | 0.399 | 1.281 |
| KEL       | 0.301  | 0.296 | 1.014  | 0.31  | 1.351 | 0.401 | 0.876  | 0.381 | 0.756 | 2.415 |
| KEAP1     | -0.258 | 0.3   | -0.859 | 0.39  | 0.773 | 0.232 | -0.98  | 0.327 | 0.429 | 1.391 |
| KDSR      | 0.062  | 0.295 | 0.209  | 0.834 | 1.064 | 0.314 | 0.203  | 0.839 | 0.597 | 1.896 |
| KDR       | -0.158 | 0.296 | -0.532 | 0.595 | 0.854 | 0.253 | -0.576 | 0.565 | 0.478 | 1.527 |
| KDM8      | -0.42  | 0.302 | -1.388 | 0.165 | 0.657 | 0.199 | -1.725 | 0.084 | 0.363 | 1.189 |
| KDM7A     | 0.261  | 0.3   | 0.868  | 0.385 | 1.298 | 0.389 | 0.764  | 0.445 | 0.721 | 2.336 |
| KDM6B     | -0.136 | 0.296 | -0.46  | 0.646 | 0.873 | 0.258 | -0.492 | 0.622 | 0.489 | 1.558 |

|         |        |       |        |       |       |       |        |       |       |       |
|---------|--------|-------|--------|-------|-------|-------|--------|-------|-------|-------|
| KDM6A   | -0.035 | 0.295 | -0.12  | 0.904 | 0.965 | 0.285 | -0.122 | 0.903 | 0.541 | 1.721 |
| KDM5D   | -0.123 | 0.296 | -0.414 | 0.679 | 0.885 | 0.262 | -0.441 | 0.659 | 0.495 | 1.58  |
| KDM5C   | 0.349  | 0.3   | 1.163  | 0.245 | 1.417 | 0.425 | 0.982  | 0.326 | 0.788 | 2.55  |
| KDM5B   | -0.368 | 0.3   | -1.227 | 0.22  | 0.692 | 0.207 | -1.484 | 0.138 | 0.385 | 1.245 |
| KDM5A   | 0.506  | 0.3   | 1.685  | 0.092 | 1.658 | 0.498 | 1.322  | 0.186 | 0.921 | 2.988 |
| KDM4D   | -0.092 | 0.295 | -0.31  | 0.756 | 0.912 | 0.269 | -0.325 | 0.745 | 0.512 | 1.627 |
| KDM4C   | -0.041 | 0.296 | -0.138 | 0.89  | 0.96  | 0.284 | -0.141 | 0.888 | 0.537 | 1.715 |
| KDM4B   | -0.216 | 0.298 | -0.726 | 0.468 | 0.805 | 0.24  | -0.81  | 0.418 | 0.449 | 1.445 |
| KDM4A   | -0.454 | 0.302 | -1.503 | 0.133 | 0.635 | 0.192 | -1.903 | 0.057 | 0.351 | 1.148 |
| KDM3B   | -0.033 | 0.295 | -0.111 | 0.912 | 0.968 | 0.286 | -0.112 | 0.911 | 0.543 | 1.726 |
| KDM3A   | -0.647 | 0.305 | -2.12  | 0.034 | 0.524 | 0.16  | -2.981 | 0.003 | 0.288 | 0.952 |
| KDM2A   | 0.699  | 0.315 | 2.219  | 0.026 | 2.011 | 0.633 | 1.597  | 0.11  | 1.085 | 3.729 |
| KDM1A   | 0.328  | 0.297 | 1.103  | 0.27  | 1.388 | 0.412 | 0.941  | 0.347 | 0.775 | 2.483 |
| KDELR3  | -0.417 | 0.3   | -1.391 | 0.164 | 0.659 | 0.197 | -1.726 | 0.084 | 0.366 | 1.186 |
| KDELR2  | 0.485  | 0.302 | 1.603  | 0.109 | 1.624 | 0.491 | 1.271  | 0.204 | 0.898 | 2.937 |
| KDELR1  | -0.101 | 0.296 | -0.341 | 0.733 | 0.904 | 0.267 | -0.359 | 0.72  | 0.507 | 1.614 |
| KCTD9   | 0.04   | 0.296 | 0.135  | 0.892 | 1.041 | 0.308 | 0.133  | 0.894 | 0.582 | 1.86  |
| KCTD5   | 0.59   | 0.306 | 1.93   | 0.054 | 1.804 | 0.551 | 1.458  | 0.145 | 0.991 | 3.283 |
| KCTD3   | 0.112  | 0.296 | 0.38   | 0.704 | 1.119 | 0.331 | 0.359  | 0.72  | 0.626 | 2     |
| KCTD20  | -0.104 | 0.296 | -0.35  | 0.726 | 0.902 | 0.267 | -0.369 | 0.712 | 0.505 | 1.611 |
| KCTD2   | -0.197 | 0.297 | -0.663 | 0.507 | 0.821 | 0.244 | -0.733 | 0.463 | 0.458 | 1.47  |
| KCTD17  | -0.065 | 0.296 | -0.219 | 0.827 | 0.937 | 0.278 | -0.226 | 0.821 | 0.524 | 1.676 |
| KCTD15  | 0.549  | 0.311 | 1.765  | 0.078 | 1.731 | 0.538 | 1.358  | 0.174 | 0.941 | 3.185 |
| KCTD13  | -0.35  | 0.3   | -1.167 | 0.243 | 0.705 | 0.211 | -1.397 | 0.162 | 0.392 | 1.268 |
| KCTD12  | -0.55  | 0.301 | -1.829 | 0.067 | 0.577 | 0.173 | -2.438 | 0.015 | 0.32  | 1.04  |
| KCNV2   | 0.395  | 0.3   | 1.319  | 0.187 | 1.485 | 0.445 | 1.089  | 0.276 | 0.825 | 2.672 |
| KCNV1   | 0.056  | 0.295 | 0.191  | 0.849 | 1.058 | 0.312 | 0.185  | 0.853 | 0.593 | 1.887 |
| KCNS3   | 0.015  | 0.295 | 0.052  | 0.958 | 1.016 | 0.3   | 0.052  | 0.959 | 0.569 | 1.811 |
| KCNS1   | -0.213 | 0.296 | -0.718 | 0.473 | 0.808 | 0.24  | -0.8   | 0.424 | 0.452 | 1.445 |
| KCNQ4   | 0.368  | 0.298 | 1.236  | 0.216 | 1.445 | 0.43  | 1.034  | 0.301 | 0.806 | 2.588 |
| KCNQ3   | 0.194  | 0.295 | 0.657  | 0.511 | 1.214 | 0.359 | 0.597  | 0.55  | 0.681 | 2.166 |
| KCNQ2   | 0.233  | 0.296 | 0.788  | 0.431 | 1.263 | 0.374 | 0.703  | 0.482 | 0.707 | 2.257 |
| KCNQ1DN | 0.507  | 0.302 | 1.676  | 0.094 | 1.66  | 0.502 | 1.314  | 0.189 | 0.918 | 3.003 |
| KCNQ1   | 0.519  | 0.302 | 1.718  | 0.086 | 1.68  | 0.508 | 1.34   | 0.18  | 0.93  | 3.038 |
| KCNN4   | -0.249 | 0.297 | -0.838 | 0.402 | 0.78  | 0.231 | -0.952 | 0.341 | 0.436 | 1.395 |
| KCNN3   | -0.834 | 0.315 | -2.647 | 0.008 | 0.435 | 0.137 | -4.133 | 0     | 0.234 | 0.805 |
| KCNN2   | 0.145  | 0.295 | 0.491  | 0.623 | 1.156 | 0.342 | 0.457  | 0.647 | 0.648 | 2.063 |
| KCNN1   | 0.13   | 0.296 | 0.44   | 0.66  | 1.139 | 0.338 | 0.412  | 0.68  | 0.637 | 2.036 |



|        |        |       |        |       |       |       |        |       |       |       |
|--------|--------|-------|--------|-------|-------|-------|--------|-------|-------|-------|
| KCNMB4 | 0.059  | 0.296 | 0.199  | 0.842 | 1.061 | 0.314 | 0.194  | 0.846 | 0.594 | 1.894 |
| KCNMB3 | 0.413  | 0.3   | 1.376  | 0.169 | 1.512 | 0.454 | 1.127  | 0.26  | 0.839 | 2.724 |
| KCNMB2 | 0.124  | 0.295 | 0.421  | 0.674 | 1.132 | 0.334 | 0.396  | 0.692 | 0.635 | 2.02  |
| KCNMB1 | -0.424 | 0.298 | -1.425 | 0.154 | 0.654 | 0.195 | -1.775 | 0.076 | 0.365 | 1.173 |
| KCNMA1 | -0.476 | 0.3   | -1.586 | 0.113 | 0.621 | 0.186 | -2.032 | 0.042 | 0.345 | 1.119 |
| KCNK7  | -0.013 | 0.295 | -0.043 | 0.966 | 0.987 | 0.292 | -0.043 | 0.965 | 0.553 | 1.762 |
| KCNK5  | 0.901  | 0.321 | 2.808  | 0.005 | 2.462 | 0.79  | 1.851  | 0.064 | 1.312 | 4.616 |
| KCNK3  | 0.313  | 0.298 | 1.052  | 0.293 | 1.367 | 0.407 | 0.903  | 0.367 | 0.763 | 2.45  |
| KCNK2  | -0.071 | 0.295 | -0.241 | 0.81  | 0.931 | 0.275 | -0.25  | 0.803 | 0.522 | 1.661 |
| KCNK15 | 0.259  | 0.297 | 0.874  | 0.382 | 1.296 | 0.384 | 0.77   | 0.442 | 0.724 | 2.318 |
| KCNK13 | -0.061 | 0.296 | -0.205 | 0.838 | 0.941 | 0.279 | -0.211 | 0.833 | 0.526 | 1.683 |
| KCNK12 | -0.553 | 0.303 | -1.826 | 0.068 | 0.575 | 0.174 | -2.44  | 0.015 | 0.317 | 1.041 |
| KCNK10 | 0.596  | 0.306 | 1.949  | 0.051 | 1.815 | 0.555 | 1.468  | 0.142 | 0.997 | 3.307 |
| KCNK1  | 0.312  | 0.3   | 1.039  | 0.299 | 1.366 | 0.41  | 0.893  | 0.372 | 0.759 | 2.46  |
| KCNJ9  | 0.154  | 0.296 | 0.521  | 0.602 | 1.167 | 0.346 | 0.483  | 0.629 | 0.653 | 2.086 |
| KCNJ8  | 0.286  | 0.298 | 0.961  | 0.337 | 1.331 | 0.396 | 0.835  | 0.403 | 0.743 | 2.385 |
| KCNJ6  | -0.465 | 0.302 | -1.539 | 0.124 | 0.628 | 0.19  | -1.96  | 0.05  | 0.347 | 1.136 |
| KCNJ5  | 0.24   | 0.296 | 0.809  | 0.419 | 1.271 | 0.377 | 0.719  | 0.472 | 0.711 | 2.272 |
| KCNJ4  | -0.263 | 0.298 | -0.885 | 0.376 | 0.769 | 0.229 | -1.012 | 0.312 | 0.429 | 1.377 |
| KCNJ3  | -0.063 | 0.296 | -0.213 | 0.831 | 0.939 | 0.278 | -0.22  | 0.826 | 0.526 | 1.676 |
| KCNJ2  | -0.252 | 0.298 | -0.848 | 0.396 | 0.777 | 0.231 | -0.965 | 0.335 | 0.434 | 1.392 |
| KCNJ16 | -0.189 | 0.297 | -0.638 | 0.524 | 0.828 | 0.246 | -0.702 | 0.483 | 0.463 | 1.48  |
| KCNJ15 | -0.231 | 0.298 | -0.776 | 0.438 | 0.793 | 0.237 | -0.873 | 0.383 | 0.442 | 1.424 |
| KCNJ14 | 0.192  | 0.299 | 0.644  | 0.519 | 1.212 | 0.362 | 0.586  | 0.558 | 0.675 | 2.176 |
| KCNJ13 | 0.489  | 0.302 | 1.617  | 0.106 | 1.631 | 0.493 | 1.279  | 0.201 | 0.901 | 2.95  |
| KCNJ10 | 0.373  | 0.3   | 1.242  | 0.214 | 1.451 | 0.435 | 1.037  | 0.3   | 0.806 | 2.613 |
| KCNJ1  | -0.537 | 0.301 | -1.781 | 0.075 | 0.585 | 0.176 | -2.358 | 0.018 | 0.324 | 1.055 |
| KCNIP2 | 0.247  | 0.298 | 0.83   | 0.406 | 1.28  | 0.381 | 0.735  | 0.462 | 0.714 | 2.295 |
| KCNIP1 | 0.166  | 0.296 | 0.559  | 0.576 | 1.18  | 0.35  | 0.515  | 0.607 | 0.66  | 2.109 |
| KCNH6  | 0.336  | 0.298 | 1.128  | 0.259 | 1.399 | 0.417 | 0.958  | 0.338 | 0.78  | 2.509 |
| KCNH4  | 0.316  | 0.3   | 1.056  | 0.291 | 1.372 | 0.411 | 0.905  | 0.366 | 0.763 | 2.468 |
| KCNH2  | 0.518  | 0.306 | 1.69   | 0.091 | 1.679 | 0.514 | 1.319  | 0.187 | 0.921 | 3.061 |
| KCNH1  | -0.007 | 0.296 | -0.024 | 0.98  | 0.993 | 0.294 | -0.025 | 0.98  | 0.556 | 1.773 |
| KCNG2  | -0.405 | 0.303 | -1.339 | 0.181 | 0.667 | 0.202 | -1.651 | 0.099 | 0.369 | 1.207 |
| KCNG1  | 0.578  | 0.303 | 1.908  | 0.056 | 1.783 | 0.54  | 1.449  | 0.147 | 0.985 | 3.228 |
| KCNF1  | 0.459  | 0.3   | 1.531  | 0.126 | 1.583 | 0.475 | 1.227  | 0.22  | 0.879 | 2.849 |
| KCNE5  | 0.569  | 0.302 | 1.883  | 0.06  | 1.767 | 0.534 | 1.436  | 0.151 | 0.977 | 3.196 |
| KCNE4  | -0.659 | 0.311 | -2.119 | 0.034 | 0.518 | 0.161 | -2.999 | 0.003 | 0.281 | 0.952 |

|         |        |       |        |       |       |       |        |       |       |       |
|---------|--------|-------|--------|-------|-------|-------|--------|-------|-------|-------|
| KCNE2   | -0.256 | 0.298 | -0.858 | 0.391 | 0.774 | 0.231 | -0.978 | 0.328 | 0.432 | 1.388 |
| KCNE1   | 0.008  | 0.295 | 0.028  | 0.977 | 1.008 | 0.298 | 0.028  | 0.977 | 0.565 | 1.798 |
| KCND3   | -0.375 | 0.308 | -1.217 | 0.223 | 0.687 | 0.212 | -1.477 | 0.14  | 0.376 | 1.257 |
| KCND2   | -0.319 | 0.298 | -1.074 | 0.283 | 0.727 | 0.216 | -1.265 | 0.206 | 0.406 | 1.302 |
| KCND1   | -0.024 | 0.298 | -0.08  | 0.936 | 0.976 | 0.291 | -0.081 | 0.935 | 0.544 | 1.751 |
| KCNC4   | 0.411  | 0.298 | 1.377  | 0.168 | 1.508 | 0.45  | 1.129  | 0.259 | 0.84  | 2.708 |
| KCNC3   | -0.407 | 0.301 | -1.351 | 0.177 | 0.666 | 0.2   | -1.666 | 0.096 | 0.369 | 1.201 |
| KCNC2   | -0.112 | 0.296 | -0.378 | 0.705 | 0.894 | 0.265 | -0.4   | 0.689 | 0.5   | 1.598 |
| KCNC1   | 0.29   | 0.298 | 0.974  | 0.33  | 1.336 | 0.398 | 0.846  | 0.398 | 0.746 | 2.394 |
| KCNB2   | 0.277  | 0.296 | 0.935  | 0.35  | 1.319 | 0.391 | 0.817  | 0.414 | 0.738 | 2.357 |
| KCNB1   | 0.766  | 0.31  | 2.467  | 0.014 | 2.151 | 0.668 | 1.723  | 0.085 | 1.17  | 3.952 |
| KCNAB3  | 0.071  | 0.296 | 0.239  | 0.811 | 1.073 | 0.317 | 0.23   | 0.818 | 0.601 | 1.916 |
| KCNAB2  | 0.056  | 0.296 | 0.19   | 0.85  | 1.058 | 0.313 | 0.184  | 0.854 | 0.593 | 1.888 |
| KCNAB1  | -0.017 | 0.295 | -0.059 | 0.953 | 0.983 | 0.29  | -0.06  | 0.952 | 0.551 | 1.752 |
| KCNA5   | -0.494 | 0.302 | -1.636 | 0.102 | 0.61  | 0.184 | -2.117 | 0.034 | 0.337 | 1.103 |
| KCNA4   | 0.202  | 0.296 | 0.683  | 0.495 | 1.224 | 0.362 | 0.619  | 0.536 | 0.686 | 2.184 |
| KCNA3   | 0.585  | 0.306 | 1.91   | 0.056 | 1.795 | 0.55  | 1.446  | 0.148 | 0.985 | 3.271 |
| KCNA2   | 0.353  | 0.298 | 1.185  | 0.236 | 1.423 | 0.424 | 0.999  | 0.318 | 0.794 | 2.551 |
| KCNA10  | 0.253  | 0.298 | 0.849  | 0.396 | 1.288 | 0.384 | 0.75   | 0.453 | 0.718 | 2.309 |
| KCNA1   | 0.131  | 0.296 | 0.445  | 0.657 | 1.14  | 0.337 | 0.417  | 0.677 | 0.639 | 2.036 |
| KCMF1   | 0.788  | 0.31  | 2.545  | 0.011 | 2.2   | 0.682 | 1.761  | 0.078 | 1.199 | 4.038 |
| KBTBD4  | -0.264 | 0.301 | -0.878 | 0.38  | 0.768 | 0.231 | -1.005 | 0.315 | 0.426 | 1.385 |
| KBTBD2  | 0.562  | 0.302 | 1.858  | 0.063 | 1.754 | 0.53  | 1.422  | 0.155 | 0.97  | 3.172 |
| KBTBD11 | -0.24  | 0.298 | -0.806 | 0.42  | 0.787 | 0.234 | -0.911 | 0.362 | 0.439 | 1.41  |
| KAZN    | -0.74  | 0.315 | -2.348 | 0.019 | 0.477 | 0.15  | -3.478 | 0.001 | 0.257 | 0.885 |
| KAZALD1 | 0.474  | 0.3   | 1.579  | 0.114 | 1.606 | 0.482 | 1.257  | 0.209 | 0.892 | 2.893 |
| KATNIP  | 0.148  | 0.296 | 0.5    | 0.617 | 1.16  | 0.343 | 0.465  | 0.642 | 0.649 | 2.072 |
| KATNBL1 | -0.41  | 0.3   | -1.367 | 0.172 | 0.664 | 0.199 | -1.689 | 0.091 | 0.369 | 1.195 |
| KATNB1  | 0.441  | 0.3   | 1.471  | 0.141 | 1.554 | 0.466 | 1.19   | 0.234 | 0.864 | 2.795 |
| KATNA1  | 0.412  | 0.3   | 1.374  | 0.169 | 1.509 | 0.452 | 1.126  | 0.26  | 0.839 | 2.715 |
| KAT8    | 0.289  | 0.297 | 0.971  | 0.331 | 1.335 | 0.397 | 0.844  | 0.399 | 0.745 | 2.391 |
| KAT7    | 0.199  | 0.299 | 0.667  | 0.505 | 1.221 | 0.365 | 0.605  | 0.546 | 0.679 | 2.193 |
| KAT6B   | -0.017 | 0.295 | -0.058 | 0.954 | 0.983 | 0.29  | -0.059 | 0.953 | 0.551 | 1.752 |
| KAT6A   | -0.106 | 0.296 | -0.36  | 0.719 | 0.899 | 0.266 | -0.38  | 0.704 | 0.503 | 1.605 |
| KAT5    | -0.228 | 0.298 | -0.766 | 0.444 | 0.796 | 0.237 | -0.86  | 0.39  | 0.444 | 1.427 |
| KAT2B   | 0.014  | 0.295 | 0.047  | 0.962 | 1.014 | 0.299 | 0.047  | 0.963 | 0.569 | 1.808 |
| KAT2A   | -0.03  | 0.297 | -0.103 | 0.918 | 0.97  | 0.288 | -0.104 | 0.917 | 0.542 | 1.736 |
| KARS1   | 0.98   | 0.321 | 3.055  | 0.002 | 2.665 | 0.855 | 1.947  | 0.052 | 1.421 | 4.997 |

|         |        |       |        |       |       |       |        |       |       |       |
|---------|--------|-------|--------|-------|-------|-------|--------|-------|-------|-------|
| KANSL3  | -0.08  | 0.297 | -0.27  | 0.787 | 0.923 | 0.275 | -0.281 | 0.779 | 0.515 | 1.653 |
| KANSL2  | 0.71   | 0.31  | 2.294  | 0.022 | 2.034 | 0.63  | 1.642  | 0.101 | 1.109 | 3.733 |
| KANSL1L | -0.11  | 0.295 | -0.373 | 0.709 | 0.896 | 0.265 | -0.394 | 0.693 | 0.502 | 1.598 |
| KANK3   | 0.273  | 0.297 | 0.918  | 0.358 | 1.314 | 0.391 | 0.804  | 0.422 | 0.734 | 2.354 |
| KANK2   | -0.242 | 0.295 | -0.818 | 0.413 | 0.785 | 0.232 | -0.926 | 0.355 | 0.44  | 1.401 |
| KANK1   | -0.412 | 0.299 | -1.375 | 0.169 | 0.662 | 0.198 | -1.701 | 0.089 | 0.368 | 1.191 |
| KALRN   | -0.067 | 0.295 | -0.226 | 0.821 | 0.936 | 0.276 | -0.233 | 0.815 | 0.524 | 1.669 |
| JUP     | 0.405  | 0.3   | 1.352  | 0.176 | 1.499 | 0.449 | 1.112  | 0.266 | 0.833 | 2.697 |
| JUND    | -0.028 | 0.295 | -0.096 | 0.924 | 0.972 | 0.287 | -0.097 | 0.922 | 0.545 | 1.734 |
| JUNB    | -0.114 | 0.295 | -0.387 | 0.699 | 0.892 | 0.263 | -0.41  | 0.682 | 0.5   | 1.591 |
| JUN     | 0.302  | 0.297 | 1.015  | 0.31  | 1.352 | 0.402 | 0.876  | 0.381 | 0.755 | 2.421 |
| JTB     | 0.202  | 0.296 | 0.682  | 0.495 | 1.224 | 0.362 | 0.618  | 0.537 | 0.685 | 2.187 |
| JRKL    | 0.093  | 0.296 | 0.314  | 0.754 | 1.097 | 0.324 | 0.3    | 0.764 | 0.615 | 1.958 |
| JRK     | 0.654  | 0.31  | 2.112  | 0.035 | 1.924 | 0.596 | 1.55   | 0.121 | 1.048 | 3.53  |
| JPT2    | -0.013 | 0.295 | -0.045 | 0.964 | 0.987 | 0.291 | -0.045 | 0.964 | 0.554 | 1.76  |
| JPT1    | 0.675  | 0.306 | 2.207  | 0.027 | 1.964 | 0.6   | 1.605  | 0.108 | 1.079 | 3.576 |
| JPH3    | -0.031 | 0.296 | -0.104 | 0.917 | 0.97  | 0.287 | -0.106 | 0.916 | 0.543 | 1.73  |
| JPH2    | 0.017  | 0.295 | 0.056  | 0.955 | 1.017 | 0.3   | 0.056  | 0.955 | 0.57  | 1.813 |
| JOSD1   | -0.142 | 0.296 | -0.481 | 0.631 | 0.867 | 0.257 | -0.516 | 0.606 | 0.485 | 1.55  |
| JMJD6   | 0.525  | 0.303 | 1.735  | 0.083 | 1.69  | 0.512 | 1.35   | 0.177 | 0.934 | 3.059 |
| JMJD4   | 0.916  | 0.315 | 2.907  | 0.004 | 2.498 | 0.787 | 1.904  | 0.057 | 1.347 | 4.632 |
| JMJD1C  | -0.191 | 0.296 | -0.646 | 0.519 | 0.826 | 0.245 | -0.711 | 0.477 | 0.462 | 1.476 |
| JHY     | -0.326 | 0.3   | -1.087 | 0.277 | 0.722 | 0.216 | -1.285 | 0.199 | 0.401 | 1.299 |
| JCHAIN  | -0.526 | 0.302 | -1.739 | 0.082 | 0.591 | 0.179 | -2.289 | 0.022 | 0.327 | 1.069 |
| JCAD    | -0.869 | 0.315 | -2.761 | 0.006 | 0.419 | 0.132 | -4.4   | 0     | 0.226 | 0.777 |
| JARID2  | -0.071 | 0.295 | -0.241 | 0.81  | 0.931 | 0.275 | -0.25  | 0.803 | 0.522 | 1.661 |
| JAM3    | -0.518 | 0.301 | -1.721 | 0.085 | 0.596 | 0.179 | -2.254 | 0.024 | 0.331 | 1.075 |
| JAM2    | -0.587 | 0.302 | -1.943 | 0.052 | 0.556 | 0.168 | -2.644 | 0.008 | 0.307 | 1.005 |
| JAKMIP2 | -0.25  | 0.297 | -0.842 | 0.4   | 0.779 | 0.231 | -0.956 | 0.339 | 0.435 | 1.394 |
| JAK3    | -0.148 | 0.296 | -0.499 | 0.618 | 0.863 | 0.255 | -0.538 | 0.591 | 0.483 | 1.541 |
| JAK2    | -0.867 | 0.315 | -2.751 | 0.006 | 0.42  | 0.132 | -4.379 | 0     | 0.226 | 0.779 |
| JAK1    | -0.902 | 0.315 | -2.866 | 0.004 | 0.406 | 0.128 | -4.654 | 0     | 0.219 | 0.752 |
| JAG2    | -0.119 | 0.297 | -0.402 | 0.688 | 0.887 | 0.264 | -0.427 | 0.67  | 0.495 | 1.59  |
| JAG1    | -0.602 | 0.306 | -1.971 | 0.049 | 0.548 | 0.167 | -2.704 | 0.007 | 0.301 | 0.997 |
| JADE3   | 0.171  | 0.297 | 0.575  | 0.565 | 1.186 | 0.352 | 0.529  | 0.597 | 0.663 | 2.123 |
| JADE2   | -0.052 | 0.295 | -0.177 | 0.86  | 0.949 | 0.28  | -0.182 | 0.856 | 0.532 | 1.693 |
| JADE1   | 0.179  | 0.296 | 0.603  | 0.547 | 1.196 | 0.354 | 0.552  | 0.581 | 0.669 | 2.137 |
| IZUMO4  | 0.07   | 0.297 | 0.237  | 0.813 | 1.073 | 0.319 | 0.229  | 0.819 | 0.599 | 1.92  |

|          |        |       |        |       |       |       |        |       |       |       |
|----------|--------|-------|--------|-------|-------|-------|--------|-------|-------|-------|
| IVNS1ABP | 0.093  | 0.295 | 0.316  | 0.752 | 1.098 | 0.324 | 0.302  | 0.763 | 0.616 | 1.957 |
| IVL      | -0.185 | 0.296 | -0.627 | 0.531 | 0.831 | 0.246 | -0.688 | 0.491 | 0.465 | 1.483 |
| IVD      | -0.288 | 0.298 | -0.968 | 0.333 | 0.75  | 0.223 | -1.122 | 0.262 | 0.418 | 1.343 |
| ITSN2    | 0.034  | 0.295 | 0.116  | 0.908 | 1.035 | 0.305 | 0.114  | 0.909 | 0.58  | 1.845 |
| ITSN1    | -0.312 | 0.3   | -1.042 | 0.297 | 0.732 | 0.219 | -1.223 | 0.221 | 0.406 | 1.317 |
| ITPRID2  | -0.276 | 0.298 | -0.927 | 0.354 | 0.759 | 0.226 | -1.068 | 0.286 | 0.423 | 1.36  |
| ITPR3    | 0.32   | 0.3   | 1.067  | 0.286 | 1.377 | 0.413 | 0.913  | 0.361 | 0.765 | 2.48  |
| ITPR2    | 0.092  | 0.296 | 0.311  | 0.756 | 1.096 | 0.324 | 0.297  | 0.767 | 0.614 | 1.956 |
| ITPR1    | -0.431 | 0.303 | -1.423 | 0.155 | 0.65  | 0.197 | -1.778 | 0.075 | 0.359 | 1.177 |
| ITPKC    | 0.476  | 0.3   | 1.591  | 0.112 | 1.61  | 0.482 | 1.265  | 0.206 | 0.895 | 2.897 |
| ITPKB    | -0.038 | 0.295 | -0.128 | 0.898 | 0.963 | 0.284 | -0.131 | 0.896 | 0.54  | 1.718 |
| ITPKA    | 0.168  | 0.296 | 0.567  | 0.571 | 1.183 | 0.351 | 0.522  | 0.602 | 0.662 | 2.115 |
| ITPK1    | 0.569  | 0.303 | 1.876  | 0.061 | 1.766 | 0.535 | 1.431  | 0.152 | 0.975 | 3.199 |
| ITPA     | -0.034 | 0.295 | -0.116 | 0.907 | 0.966 | 0.285 | -0.118 | 0.906 | 0.542 | 1.724 |
| ITM2C    | -0.31  | 0.298 | -1.043 | 0.297 | 0.733 | 0.218 | -1.223 | 0.221 | 0.409 | 1.314 |
| ITM2B    | -0.423 | 0.298 | -1.418 | 0.156 | 0.655 | 0.195 | -1.765 | 0.077 | 0.365 | 1.175 |
| ITM2A    | -1.019 | 0.317 | -3.211 | 0.001 | 0.361 | 0.115 | -5.58  | 0     | 0.194 | 0.672 |
| ITK      | -0.726 | 0.307 | -2.363 | 0.018 | 0.484 | 0.149 | -3.473 | 0.001 | 0.265 | 0.883 |
| ITIH5    | 0.472  | 0.302 | 1.563  | 0.118 | 1.604 | 0.485 | 1.246  | 0.213 | 0.887 | 2.9   |
| ITIH4    | 0.236  | 0.298 | 0.794  | 0.427 | 1.267 | 0.377 | 0.707  | 0.48  | 0.707 | 2.27  |
| ITIH3    | -0.699 | 0.307 | -2.277 | 0.023 | 0.497 | 0.153 | -3.295 | 0.001 | 0.273 | 0.907 |
| ITIH2    | 0.207  | 0.298 | 0.695  | 0.487 | 1.23  | 0.367 | 0.628  | 0.53  | 0.686 | 2.206 |
| ITIH1    | -0.013 | 0.295 | -0.045 | 0.964 | 0.987 | 0.291 | -0.045 | 0.964 | 0.554 | 1.759 |
| ITGBL1   | -1.224 | 0.336 | -3.643 | 0     | 0.294 | 0.099 | -7.147 | 0     | 0.152 | 0.568 |
| ITGB8    | 0.233  | 0.296 | 0.786  | 0.432 | 1.262 | 0.374 | 0.701  | 0.483 | 0.706 | 2.255 |
| ITGB7    | -0.057 | 0.296 | -0.194 | 0.846 | 0.944 | 0.279 | -0.2   | 0.842 | 0.529 | 1.686 |
| ITGB5    | -0.247 | 0.296 | -0.833 | 0.405 | 0.781 | 0.231 | -0.944 | 0.345 | 0.437 | 1.396 |
| ITGB4    | -0.339 | 0.298 | -1.138 | 0.255 | 0.713 | 0.212 | -1.355 | 0.175 | 0.398 | 1.277 |
| ITGB3BP  | 0.024  | 0.298 | 0.08   | 0.936 | 1.024 | 0.305 | 0.079  | 0.937 | 0.571 | 1.837 |
| ITGB3    | 0.507  | 0.3   | 1.691  | 0.091 | 1.661 | 0.498 | 1.326  | 0.185 | 0.923 | 2.989 |
| ITGB2    | -0.223 | 0.296 | -0.752 | 0.452 | 0.8   | 0.237 | -0.842 | 0.4   | 0.448 | 1.431 |
| ITGB1BP2 | -0.101 | 0.295 | -0.343 | 0.732 | 0.904 | 0.267 | -0.361 | 0.718 | 0.507 | 1.612 |
| ITGB1BP1 | 0.092  | 0.295 | 0.312  | 0.755 | 1.097 | 0.324 | 0.298  | 0.766 | 0.615 | 1.957 |
| ITGB1    | -0.096 | 0.295 | -0.324 | 0.746 | 0.909 | 0.268 | -0.34  | 0.734 | 0.509 | 1.621 |
| ITGAX    | -0.011 | 0.295 | -0.037 | 0.971 | 0.989 | 0.292 | -0.037 | 0.97  | 0.555 | 1.764 |
| ITGAV    | -0.605 | 0.304 | -1.991 | 0.046 | 0.546 | 0.166 | -2.736 | 0.006 | 0.301 | 0.991 |
| ITGAM    | 0.04   | 0.296 | 0.136  | 0.892 | 1.041 | 0.308 | 0.134  | 0.894 | 0.583 | 1.858 |
| ITGAL    | 0.122  | 0.295 | 0.412  | 0.68  | 1.129 | 0.334 | 0.388  | 0.698 | 0.633 | 2.015 |

|         |        |       |        |       |       |       |        |       |       |       |
|---------|--------|-------|--------|-------|-------|-------|--------|-------|-------|-------|
| ITGAE   | 0.051  | 0.296 | 0.174  | 0.862 | 1.053 | 0.312 | 0.169  | 0.866 | 0.589 | 1.882 |
| ITGA9   | -0.299 | 0.297 | -1.006 | 0.314 | 0.742 | 0.22  | -1.173 | 0.241 | 0.414 | 1.327 |
| ITGA8   | -0.332 | 0.297 | -1.118 | 0.264 | 0.718 | 0.213 | -1.326 | 0.185 | 0.401 | 1.284 |
| ITGA7   | -0.196 | 0.296 | -0.661 | 0.509 | 0.822 | 0.244 | -0.73  | 0.465 | 0.46  | 1.47  |
| ITGA6   | -0.129 | 0.295 | -0.437 | 0.662 | 0.879 | 0.26  | -0.466 | 0.641 | 0.493 | 1.568 |
| ITGA5   | -0.687 | 0.306 | -2.242 | 0.025 | 0.503 | 0.154 | -3.224 | 0.001 | 0.276 | 0.917 |
| ITGA4   | -0.136 | 0.296 | -0.459 | 0.646 | 0.873 | 0.258 | -0.492 | 0.623 | 0.489 | 1.56  |
| ITGA3   | 0.098  | 0.296 | 0.333  | 0.739 | 1.103 | 0.326 | 0.317  | 0.751 | 0.618 | 1.97  |
| ITGA2B  | 0.404  | 0.3   | 1.348  | 0.178 | 1.498 | 0.449 | 1.109  | 0.267 | 0.832 | 2.695 |
| ITGA2   | -0.28  | 0.298 | -0.941 | 0.347 | 0.756 | 0.225 | -1.085 | 0.278 | 0.422 | 1.354 |
| ITGA10  | -0.04  | 0.296 | -0.135 | 0.893 | 0.961 | 0.284 | -0.138 | 0.89  | 0.538 | 1.716 |
| ITGA1   | -0.089 | 0.296 | -0.302 | 0.763 | 0.915 | 0.27  | -0.316 | 0.752 | 0.512 | 1.633 |
| ITFG2   | 0.166  | 0.296 | 0.561  | 0.575 | 1.181 | 0.349 | 0.517  | 0.605 | 0.661 | 2.107 |
| ITFG1   | 0.335  | 0.298 | 1.125  | 0.261 | 1.398 | 0.416 | 0.956  | 0.339 | 0.78  | 2.505 |
| ITCH    | 0.871  | 0.321 | 2.711  | 0.007 | 2.39  | 0.768 | 1.81   | 0.07  | 1.273 | 4.487 |
| ISYNA1  | 0.056  | 0.295 | 0.191  | 0.848 | 1.058 | 0.312 | 0.186  | 0.852 | 0.593 | 1.887 |
| IST1    | 0.36   | 0.297 | 1.214  | 0.225 | 1.433 | 0.425 | 1.019  | 0.308 | 0.801 | 2.564 |
| ISOC2   | 0.353  | 0.3   | 1.178  | 0.239 | 1.423 | 0.426 | 0.993  | 0.321 | 0.791 | 2.56  |
| ISOC1   | 0.36   | 0.298 | 1.207  | 0.228 | 1.433 | 0.427 | 1.013  | 0.311 | 0.799 | 2.571 |
| ISLR    | -0.967 | 0.316 | -3.059 | 0.002 | 0.38  | 0.12  | -5.158 | 0     | 0.204 | 0.706 |
| ISL1    | 0.209  | 0.299 | 0.7    | 0.484 | 1.233 | 0.369 | 0.631  | 0.528 | 0.686 | 2.215 |
| ISG20L2 | 0.282  | 0.296 | 0.951  | 0.341 | 1.326 | 0.393 | 0.829  | 0.407 | 0.742 | 2.37  |
| ISG20   | 0.513  | 0.302 | 1.698  | 0.09  | 1.671 | 0.505 | 1.328  | 0.184 | 0.924 | 3.023 |
| ISG15   | 0.431  | 0.3   | 1.438  | 0.151 | 1.539 | 0.461 | 1.168  | 0.243 | 0.855 | 2.769 |
| ISCU    | -0.322 | 0.298 | -1.084 | 0.278 | 0.724 | 0.216 | -1.279 | 0.201 | 0.404 | 1.298 |
| ISCA1   | -0.063 | 0.297 | -0.214 | 0.831 | 0.939 | 0.278 | -0.221 | 0.825 | 0.525 | 1.678 |
| IRX5    | 0.32   | 0.297 | 1.076  | 0.282 | 1.377 | 0.409 | 0.921  | 0.357 | 0.769 | 2.464 |
| IRX4    | 0.495  | 0.302 | 1.636  | 0.102 | 1.64  | 0.496 | 1.291  | 0.197 | 0.907 | 2.967 |
| IRS4    | 0.177  | 0.296 | 0.6    | 0.548 | 1.194 | 0.353 | 0.55   | 0.582 | 0.669 | 2.131 |
| IRS2    | -0.617 | 0.306 | -2.018 | 0.044 | 0.539 | 0.165 | -2.791 | 0.005 | 0.296 | 0.982 |
| IRS1    | -0.311 | 0.3   | -1.038 | 0.299 | 0.732 | 0.22  | -1.218 | 0.223 | 0.407 | 1.319 |
| IRGQ    | -0.656 | 0.308 | -2.129 | 0.033 | 0.519 | 0.16  | -3.009 | 0.003 | 0.284 | 0.949 |
| IRGC    | 0.073  | 0.295 | 0.249  | 0.803 | 1.076 | 0.318 | 0.24   | 0.81  | 0.603 | 1.92  |
| IRF9    | 0.074  | 0.295 | 0.249  | 0.803 | 1.076 | 0.318 | 0.24   | 0.81  | 0.603 | 1.921 |
| IRF8    | 0.132  | 0.296 | 0.446  | 0.655 | 1.141 | 0.338 | 0.418  | 0.676 | 0.638 | 2.04  |
| IRF7    | 0.151  | 0.296 | 0.509  | 0.611 | 1.163 | 0.344 | 0.472  | 0.637 | 0.651 | 2.077 |
| IRF6    | -0.396 | 0.3   | -1.323 | 0.186 | 0.673 | 0.202 | -1.623 | 0.105 | 0.374 | 1.21  |
| IRF5    | -0.583 | 0.303 | -1.926 | 0.054 | 0.558 | 0.169 | -2.615 | 0.009 | 0.308 | 1.01  |

|         |        |       |        |       |       |       |        |       |       |       |
|---------|--------|-------|--------|-------|-------|-------|--------|-------|-------|-------|
| IRF4    | -0.173 | 0.296 | -0.583 | 0.56  | 0.841 | 0.249 | -0.637 | 0.524 | 0.471 | 1.503 |
| IRF3    | -0.36  | 0.298 | -1.209 | 0.227 | 0.697 | 0.208 | -1.456 | 0.146 | 0.389 | 1.251 |
| IRF2BP1 | -0.027 | 0.296 | -0.092 | 0.927 | 0.973 | 0.288 | -0.093 | 0.926 | 0.545 | 1.738 |
| IRF2    | 0.004  | 0.297 | 0.014  | 0.989 | 1.004 | 0.299 | 0.014  | 0.989 | 0.561 | 1.799 |
| IRF1    | -0.416 | 0.3   | -1.387 | 0.165 | 0.66  | 0.198 | -1.72  | 0.085 | 0.366 | 1.188 |
| IREB2   | -0.262 | 0.3   | -0.872 | 0.383 | 0.77  | 0.231 | -0.996 | 0.319 | 0.427 | 1.387 |
| IRAK4   | -0.353 | 0.298 | -1.185 | 0.236 | 0.703 | 0.209 | -1.42  | 0.155 | 0.392 | 1.26  |
| IRAK3   | -0.776 | 0.315 | -2.466 | 0.014 | 0.46  | 0.145 | -3.728 | 0     | 0.248 | 0.853 |
| IRAK1   | 0.258  | 0.296 | 0.87   | 0.384 | 1.294 | 0.383 | 0.767  | 0.443 | 0.724 | 2.313 |
| IRAG2   | -1.06  | 0.322 | -3.286 | 0.001 | 0.347 | 0.112 | -5.847 | 0     | 0.184 | 0.652 |
| IQSEC3  | -0.294 | 0.297 | -0.992 | 0.321 | 0.745 | 0.221 | -1.154 | 0.249 | 0.416 | 1.333 |
| IQSEC2  | 0.238  | 0.296 | 0.803  | 0.422 | 1.268 | 0.376 | 0.715  | 0.475 | 0.71  | 2.266 |
| IQSEC1  | -0.714 | 0.306 | -2.332 | 0.02  | 0.49  | 0.15  | -3.405 | 0.001 | 0.269 | 0.892 |
| IQGAP2  | -0.468 | 0.3   | -1.563 | 0.118 | 0.626 | 0.188 | -1.993 | 0.046 | 0.348 | 1.126 |
| IQGAP1  | -0.505 | 0.302 | -1.672 | 0.095 | 0.603 | 0.182 | -2.176 | 0.03  | 0.334 | 1.091 |
| IQCK    | -0.005 | 0.296 | -0.018 | 0.986 | 0.995 | 0.295 | -0.018 | 0.986 | 0.557 | 1.778 |
| IQCH    | -0.089 | 0.297 | -0.298 | 0.766 | 0.915 | 0.272 | -0.312 | 0.755 | 0.511 | 1.638 |
| IQCG    | -0.111 | 0.296 | -0.376 | 0.707 | 0.895 | 0.264 | -0.397 | 0.691 | 0.502 | 1.597 |
| IQCE    | -0.529 | 0.302 | -1.751 | 0.08  | 0.589 | 0.178 | -2.308 | 0.021 | 0.326 | 1.065 |
| IQCC    | -0.016 | 0.298 | -0.053 | 0.957 | 0.984 | 0.293 | -0.054 | 0.957 | 0.549 | 1.765 |
| IQCB1   | 0.358  | 0.298 | 1.202  | 0.229 | 1.43  | 0.426 | 1.011  | 0.312 | 0.798 | 2.563 |
| IQCA1   | -0.177 | 0.297 | -0.598 | 0.55  | 0.838 | 0.248 | -0.654 | 0.513 | 0.468 | 1.498 |
| IPPK    | 0.291  | 0.298 | 0.977  | 0.328 | 1.337 | 0.398 | 0.848  | 0.396 | 0.746 | 2.396 |
| IPP     | -0.015 | 0.295 | -0.052 | 0.959 | 0.985 | 0.291 | -0.052 | 0.958 | 0.552 | 1.757 |
| IPO9    | 0.604  | 0.306 | 1.978  | 0.048 | 1.83  | 0.559 | 1.484  | 0.138 | 1.006 | 3.331 |
| IPO8    | 0.069  | 0.295 | 0.235  | 0.814 | 1.072 | 0.317 | 0.227  | 0.821 | 0.601 | 1.912 |
| IPO7    | 0.504  | 0.303 | 1.664  | 0.096 | 1.655 | 0.501 | 1.307  | 0.191 | 0.914 | 2.995 |
| IPO5    | -0.008 | 0.295 | -0.027 | 0.979 | 0.992 | 0.293 | -0.027 | 0.979 | 0.557 | 1.769 |
| IPO4    | 0.485  | 0.302 | 1.605  | 0.108 | 1.624 | 0.491 | 1.272  | 0.203 | 0.898 | 2.937 |
| IPO13   | 0.001  | 0.296 | 0.003  | 0.998 | 1.001 | 0.297 | 0.003  | 0.998 | 0.56  | 1.789 |
| IPCEF1  | -0.47  | 0.299 | -1.573 | 0.116 | 0.625 | 0.187 | -2.008 | 0.045 | 0.348 | 1.123 |
| IP6K2   | -0.404 | 0.302 | -1.337 | 0.181 | 0.667 | 0.202 | -1.648 | 0.099 | 0.369 | 1.207 |
| IP6K1   | 0.35   | 0.298 | 1.173  | 0.241 | 1.419 | 0.423 | 0.99   | 0.322 | 0.791 | 2.544 |
| INVS    | 0.533  | 0.306 | 1.743  | 0.081 | 1.704 | 0.521 | 1.351  | 0.177 | 0.936 | 3.102 |
| INTS9   | -0.648 | 0.306 | -2.12  | 0.034 | 0.523 | 0.16  | -2.983 | 0.003 | 0.287 | 0.952 |
| INTS8   | 0.104  | 0.297 | 0.35   | 0.726 | 1.11  | 0.33  | 0.332  | 0.74  | 0.62  | 1.987 |
| INTS7   | 0.128  | 0.296 | 0.431  | 0.666 | 1.136 | 0.336 | 0.405  | 0.686 | 0.636 | 2.03  |
| INTS6   | 0.393  | 0.3   | 1.31   | 0.19  | 1.482 | 0.445 | 1.083  | 0.279 | 0.823 | 2.669 |

|        |        |       |        |       |       |       |        |       |       |       |
|--------|--------|-------|--------|-------|-------|-------|--------|-------|-------|-------|
| INTS5  | 0.461  | 0.302 | 1.526  | 0.127 | 1.586 | 0.479 | 1.222  | 0.222 | 0.877 | 2.868 |
| INTS3  | 0.243  | 0.296 | 0.819  | 0.413 | 1.275 | 0.378 | 0.727  | 0.467 | 0.713 | 2.278 |
| INTS14 | 0.095  | 0.295 | 0.321  | 0.748 | 1.099 | 0.324 | 0.306  | 0.76  | 0.617 | 1.96  |
| INTS13 | 0.398  | 0.3   | 1.329  | 0.184 | 1.489 | 0.446 | 1.096  | 0.273 | 0.828 | 2.678 |
| INTS12 | -0.259 | 0.311 | -0.833 | 0.405 | 0.772 | 0.24  | -0.951 | 0.341 | 0.42  | 1.419 |
| INTS1  | -0.044 | 0.295 | -0.148 | 0.883 | 0.957 | 0.283 | -0.151 | 0.88  | 0.537 | 1.707 |
| INSRR  | -0.223 | 0.296 | -0.752 | 0.452 | 0.8   | 0.237 | -0.842 | 0.4   | 0.448 | 1.431 |
| INSR   | -0.447 | 0.306 | -1.459 | 0.145 | 0.64  | 0.196 | -1.84  | 0.066 | 0.351 | 1.166 |
| INSM1  | 0.08   | 0.295 | 0.27   | 0.787 | 1.083 | 0.32  | 0.259  | 0.795 | 0.607 | 1.931 |
| INSL6  | 0.371  | 0.3   | 1.235  | 0.217 | 1.449 | 0.435 | 1.032  | 0.302 | 0.804 | 2.61  |
| INSL5  | 0.121  | 0.295 | 0.411  | 0.681 | 1.129 | 0.333 | 0.387  | 0.699 | 0.633 | 2.014 |
| INSL4  | -0.139 | 0.298 | -0.465 | 0.642 | 0.87  | 0.26  | -0.499 | 0.618 | 0.485 | 1.562 |
| INSL3  | -0.791 | 0.311 | -2.547 | 0.011 | 0.453 | 0.141 | -3.883 | 0     | 0.247 | 0.833 |
| INSIG2 | 0.055  | 0.295 | 0.185  | 0.853 | 1.056 | 0.312 | 0.18   | 0.857 | 0.592 | 1.884 |
| INSIG1 | 0.124  | 0.296 | 0.418  | 0.676 | 1.132 | 0.335 | 0.393  | 0.694 | 0.634 | 2.02  |
| INS    | 0.896  | 0.316 | 2.838  | 0.005 | 2.449 | 0.773 | 1.875  | 0.061 | 1.319 | 4.547 |
| INPPL1 | 0.095  | 0.295 | 0.323  | 0.747 | 1.1   | 0.325 | 0.308  | 0.758 | 0.617 | 1.963 |
| INPP5K | 0.085  | 0.297 | 0.286  | 0.775 | 1.088 | 0.323 | 0.274  | 0.784 | 0.608 | 1.947 |
| INPP5J | -0.143 | 0.296 | -0.481 | 0.63  | 0.867 | 0.257 | -0.517 | 0.605 | 0.485 | 1.55  |
| INPP5F | 0.031  | 0.296 | 0.104  | 0.917 | 1.031 | 0.305 | 0.103  | 0.918 | 0.578 | 1.841 |
| INPP5E | -0.016 | 0.296 | -0.056 | 0.956 | 0.984 | 0.291 | -0.056 | 0.955 | 0.551 | 1.756 |
| INPP5D | -0.817 | 0.311 | -2.627 | 0.009 | 0.442 | 0.137 | -4.062 | 0     | 0.24  | 0.813 |
| INPP5B | 0.014  | 0.296 | 0.048  | 0.962 | 1.014 | 0.3   | 0.048  | 0.962 | 0.568 | 1.811 |
| INPP5A | 0.153  | 0.295 | 0.517  | 0.605 | 1.165 | 0.344 | 0.48   | 0.631 | 0.653 | 2.079 |
| INPP4B | 0.254  | 0.298 | 0.853  | 0.394 | 1.29  | 0.385 | 0.753  | 0.451 | 0.719 | 2.314 |
| INPP4A | -0.38  | 0.298 | -1.273 | 0.203 | 0.684 | 0.204 | -1.548 | 0.122 | 0.381 | 1.228 |
| INPP1  | -0.673 | 0.31  | -2.175 | 0.03  | 0.51  | 0.158 | -3.103 | 0.002 | 0.278 | 0.936 |
| INO80D | 0.391  | 0.303 | 1.292  | 0.196 | 1.479 | 0.448 | 1.069  | 0.285 | 0.817 | 2.677 |
| INO80B | 0.379  | 0.298 | 1.274  | 0.203 | 1.462 | 0.435 | 1.06   | 0.289 | 0.815 | 2.62  |
| INHBE  | -0.016 | 0.295 | -0.054 | 0.957 | 0.984 | 0.291 | -0.054 | 0.957 | 0.552 | 1.756 |
| INHBC  | 0.574  | 0.303 | 1.896  | 0.058 | 1.775 | 0.537 | 1.443  | 0.149 | 0.981 | 3.211 |
| INHBB  | -0.342 | 0.298 | -1.15  | 0.25  | 0.71  | 0.211 | -1.371 | 0.17  | 0.396 | 1.273 |
| INHBA  | -0.551 | 0.306 | -1.804 | 0.071 | 0.576 | 0.176 | -2.406 | 0.016 | 0.317 | 1.049 |
| INHA   | -0.112 | 0.295 | -0.378 | 0.705 | 0.894 | 0.264 | -0.4   | 0.689 | 0.501 | 1.595 |
| ING4   | 0.016  | 0.295 | 0.054  | 0.957 | 1.016 | 0.3   | 0.054  | 0.957 | 0.57  | 1.811 |
| ING3   | 0.139  | 0.296 | 0.47   | 0.639 | 1.149 | 0.34  | 0.439  | 0.661 | 0.644 | 2.051 |
| ING2   | 0.378  | 0.299 | 1.263  | 0.207 | 1.459 | 0.437 | 1.052  | 0.293 | 0.812 | 2.624 |
| ING1   | -0.061 | 0.295 | -0.205 | 0.837 | 0.941 | 0.278 | -0.212 | 0.832 | 0.528 | 1.678 |

|        |        |       |        |       |       |       |        |       |       |       |
|--------|--------|-------|--------|-------|-------|-------|--------|-------|-------|-------|
| INF2   | 0.5    | 0.302 | 1.654  | 0.098 | 1.649 | 0.498 | 1.302  | 0.193 | 0.912 | 2.982 |
| INE1   | 0.066  | 0.297 | 0.221  | 0.825 | 1.068 | 0.317 | 0.214  | 0.831 | 0.597 | 1.911 |
| INCENP | -0.119 | 0.297 | -0.4   | 0.689 | 0.888 | 0.263 | -0.425 | 0.671 | 0.497 | 1.588 |
| INAVA  | 0.96   | 0.328 | 2.925  | 0.003 | 2.611 | 0.857 | 1.88   | 0.06  | 1.372 | 4.967 |
| INA    | -0.076 | 0.295 | -0.258 | 0.797 | 0.927 | 0.274 | -0.268 | 0.789 | 0.519 | 1.653 |
| IMPG2  | 0.353  | 0.3   | 1.179  | 0.238 | 1.424 | 0.427 | 0.993  | 0.321 | 0.791 | 2.562 |
| IMPG1  | -0.226 | 0.296 | -0.765 | 0.444 | 0.797 | 0.236 | -0.858 | 0.391 | 0.446 | 1.425 |
| IMPDH2 | -0.437 | 0.303 | -1.443 | 0.149 | 0.646 | 0.195 | -1.81  | 0.07  | 0.357 | 1.169 |
| IMPDH1 | 0.586  | 0.306 | 1.917  | 0.055 | 1.797 | 0.549 | 1.451  | 0.147 | 0.987 | 3.271 |
| IMPACT | -0.602 | 0.306 | -1.969 | 0.049 | 0.548 | 0.167 | -2.701 | 0.007 | 0.301 | 0.997 |
| IMPA2  | 0.174  | 0.295 | 0.588  | 0.556 | 1.19  | 0.351 | 0.54   | 0.589 | 0.667 | 2.123 |
| IMPA1  | 0.078  | 0.296 | 0.263  | 0.793 | 1.081 | 0.32  | 0.253  | 0.801 | 0.605 | 1.93  |
| IMP4   | -0.135 | 0.297 | -0.454 | 0.65  | 0.874 | 0.259 | -0.486 | 0.627 | 0.489 | 1.563 |
| IMP3   | -0.176 | 0.296 | -0.595 | 0.552 | 0.838 | 0.248 | -0.65  | 0.515 | 0.469 | 1.498 |
| IMMT   | 0.343  | 0.296 | 1.158  | 0.247 | 1.409 | 0.418 | 0.98   | 0.327 | 0.788 | 2.519 |
| ILVBL  | 0.441  | 0.3   | 1.472  | 0.141 | 1.554 | 0.466 | 1.191  | 0.234 | 0.864 | 2.796 |
| ILRUN  | 0.181  | 0.297 | 0.609  | 0.543 | 1.198 | 0.355 | 0.557  | 0.578 | 0.67  | 2.143 |
| ILKAP  | 0.141  | 0.295 | 0.479  | 0.632 | 1.152 | 0.34  | 0.447  | 0.655 | 0.646 | 2.055 |
| ILK    | -0.858 | 0.321 | -2.676 | 0.007 | 0.424 | 0.136 | -4.236 | 0     | 0.226 | 0.795 |
| ILF3   | -0.137 | 0.296 | -0.462 | 0.644 | 0.872 | 0.258 | -0.495 | 0.621 | 0.488 | 1.559 |
| ILF2   | 0.143  | 0.296 | 0.483  | 0.629 | 1.154 | 0.341 | 0.45   | 0.652 | 0.646 | 2.059 |
| IL9R   | 0.469  | 0.3   | 1.564  | 0.118 | 1.598 | 0.479 | 1.249  | 0.212 | 0.888 | 2.877 |
| IL9    | 0.045  | 0.296 | 0.151  | 0.88  | 1.046 | 0.309 | 0.147  | 0.883 | 0.586 | 1.867 |
| IL7R   | 0.143  | 0.296 | 0.485  | 0.628 | 1.154 | 0.341 | 0.452  | 0.651 | 0.646 | 2.061 |
| IL7    | -0.166 | 0.299 | -0.555 | 0.579 | 0.847 | 0.253 | -0.604 | 0.546 | 0.472 | 1.521 |
| IL6ST  | -0.783 | 0.315 | -2.488 | 0.013 | 0.457 | 0.144 | -3.776 | 0     | 0.247 | 0.847 |
| IL6R   | -0.212 | 0.296 | -0.716 | 0.474 | 0.809 | 0.24  | -0.797 | 0.425 | 0.453 | 1.445 |
| IL6    | -0.176 | 0.297 | -0.594 | 0.553 | 0.839 | 0.249 | -0.649 | 0.516 | 0.469 | 1.499 |
| IL5RA  | 0.075  | 0.296 | 0.254  | 0.799 | 1.078 | 0.319 | 0.245  | 0.807 | 0.604 | 1.924 |
| IL5    | 0.396  | 0.298 | 1.329  | 0.184 | 1.486 | 0.443 | 1.097  | 0.272 | 0.829 | 2.665 |
| IL4R   | -0.614 | 0.3   | -2.044 | 0.041 | 0.541 | 0.163 | -2.823 | 0.005 | 0.3   | 0.975 |
| IL4    | 0.966  | 0.321 | 3.012  | 0.003 | 2.628 | 0.843 | 1.931  | 0.053 | 1.401 | 4.928 |
| IL3RA  | 0.086  | 0.295 | 0.291  | 0.771 | 1.09  | 0.322 | 0.279  | 0.78  | 0.611 | 1.944 |
| IL37   | -0.074 | 0.296 | -0.25  | 0.802 | 0.929 | 0.275 | -0.26  | 0.795 | 0.52  | 1.658 |
| IL36RN | 0.346  | 0.299 | 1.159  | 0.246 | 1.414 | 0.422 | 0.98   | 0.327 | 0.787 | 2.539 |
| IL36G  | -0.084 | 0.295 | -0.286 | 0.775 | 0.919 | 0.272 | -0.298 | 0.766 | 0.515 | 1.64  |
| IL36A  | 0.679  | 0.31  | 2.19   | 0.029 | 1.972 | 0.611 | 1.59   | 0.112 | 1.074 | 3.62  |
| IL33   | -0.382 | 0.298 | -1.284 | 0.199 | 0.682 | 0.203 | -1.565 | 0.118 | 0.381 | 1.223 |



|          |        |       |        |       |       |       |        |       |       |       |
|----------|--------|-------|--------|-------|-------|-------|--------|-------|-------|-------|
| IL32     | -0.545 | 0.306 | -1.783 | 0.075 | 0.58  | 0.177 | -2.37  | 0.018 | 0.319 | 1.056 |
| IL3      | 0.416  | 0.3   | 1.389  | 0.165 | 1.516 | 0.454 | 1.136  | 0.256 | 0.843 | 2.727 |
| IL2RG    | -0.406 | 0.298 | -1.363 | 0.173 | 0.666 | 0.199 | -1.681 | 0.093 | 0.371 | 1.195 |
| IL2RB    | -0.307 | 0.297 | -1.034 | 0.301 | 0.735 | 0.219 | -1.21  | 0.226 | 0.41  | 1.317 |
| IL2RA    | -0.281 | 0.298 | -0.946 | 0.344 | 0.755 | 0.225 | -1.092 | 0.275 | 0.421 | 1.352 |
| IL27RA   | -0.157 | 0.295 | -0.531 | 0.596 | 0.855 | 0.253 | -0.575 | 0.566 | 0.479 | 1.525 |
| IL26     | -0.129 | 0.295 | -0.437 | 0.662 | 0.879 | 0.26  | -0.467 | 0.641 | 0.493 | 1.568 |
| IL25     | 0.199  | 0.299 | 0.667  | 0.505 | 1.22  | 0.364 | 0.605  | 0.545 | 0.68  | 2.191 |
| IL24     | 0.296  | 0.298 | 0.994  | 0.32  | 1.345 | 0.401 | 0.86   | 0.39  | 0.75  | 2.411 |
| IL23A    | 0.111  | 0.295 | 0.376  | 0.707 | 1.118 | 0.33  | 0.356  | 0.722 | 0.627 | 1.993 |
| IL22RA1  | 0.272  | 0.298 | 0.914  | 0.361 | 1.313 | 0.391 | 0.8    | 0.424 | 0.733 | 2.352 |
| IL22     | 0.241  | 0.296 | 0.816  | 0.414 | 1.273 | 0.377 | 0.725  | 0.468 | 0.713 | 2.273 |
| IL21R    | -0.846 | 0.311 | -2.722 | 0.006 | 0.429 | 0.133 | -4.281 | 0     | 0.233 | 0.789 |
| IL21     | -0.714 | 0.31  | -2.305 | 0.021 | 0.489 | 0.152 | -3.365 | 0.001 | 0.267 | 0.899 |
| IL20RA   | -1.089 | 0.336 | -3.239 | 0.001 | 0.337 | 0.113 | -5.862 | 0     | 0.174 | 0.651 |
| IL2      | -0.125 | 0.296 | -0.422 | 0.673 | 0.883 | 0.261 | -0.449 | 0.653 | 0.494 | 1.577 |
| IL1RN    | 0.621  | 0.306 | 2.031  | 0.042 | 1.86  | 0.569 | 1.513  | 0.13  | 1.022 | 3.387 |
| IL1RL2   | 0.198  | 0.296 | 0.669  | 0.504 | 1.219 | 0.361 | 0.607  | 0.544 | 0.682 | 2.178 |
| IL1RL1   | -0.134 | 0.296 | -0.453 | 0.651 | 0.874 | 0.259 | -0.485 | 0.628 | 0.489 | 1.563 |
| IL1RAPL2 | 0.308  | 0.306 | 1.006  | 0.314 | 1.36  | 0.416 | 0.866  | 0.387 | 0.747 | 2.478 |
| IL1RAPL1 | -0.545 | 0.306 | -1.781 | 0.075 | 0.58  | 0.177 | -2.368 | 0.018 | 0.318 | 1.056 |
| IL1RAP   | -0.564 | 0.306 | -1.844 | 0.065 | 0.569 | 0.174 | -2.476 | 0.013 | 0.313 | 1.036 |
| IL1R2    | -0.089 | 0.296 | -0.301 | 0.763 | 0.915 | 0.27  | -0.315 | 0.753 | 0.513 | 1.633 |
| IL1R1    | -0.562 | 0.301 | -1.866 | 0.062 | 0.57  | 0.172 | -2.505 | 0.012 | 0.316 | 1.029 |
| IL1B     | -0.301 | 0.3   | -1.003 | 0.316 | 0.74  | 0.222 | -1.17  | 0.242 | 0.411 | 1.332 |
| IL1A     | 0.669  | 0.31  | 2.16   | 0.031 | 1.953 | 0.605 | 1.575  | 0.115 | 1.064 | 3.585 |
| IL19     | 0.513  | 0.3   | 1.711  | 0.087 | 1.67  | 0.501 | 1.339  | 0.181 | 0.928 | 3.006 |
| IL18RAP  | -0.501 | 0.3   | -1.668 | 0.095 | 0.606 | 0.182 | -2.165 | 0.03  | 0.336 | 1.092 |
| IL18R1   | -0.456 | 0.302 | -1.507 | 0.132 | 0.634 | 0.192 | -1.909 | 0.056 | 0.35  | 1.147 |
| IL18BP   | 0.085  | 0.295 | 0.289  | 0.772 | 1.089 | 0.321 | 0.277  | 0.782 | 0.611 | 1.942 |
| IL18     | -0.257 | 0.298 | -0.864 | 0.388 | 0.773 | 0.23  | -0.985 | 0.325 | 0.432 | 1.386 |
| IL17RC   | 0.123  | 0.295 | 0.416  | 0.678 | 1.131 | 0.334 | 0.391  | 0.696 | 0.634 | 2.017 |
| IL17RB   | 0.119  | 0.295 | 0.402  | 0.688 | 1.126 | 0.333 | 0.379  | 0.705 | 0.631 | 2.009 |
| IL17RA   | 0.238  | 0.298 | 0.799  | 0.425 | 1.268 | 0.378 | 0.711  | 0.477 | 0.708 | 2.273 |
| IL17B    | 0.201  | 0.296 | 0.679  | 0.497 | 1.223 | 0.362 | 0.615  | 0.539 | 0.684 | 2.184 |
| IL17A    | 0.023  | 0.295 | 0.078  | 0.938 | 1.023 | 0.302 | 0.077  | 0.939 | 0.574 | 1.825 |
| IL16     | -0.402 | 0.298 | -1.35  | 0.177 | 0.669 | 0.199 | -1.662 | 0.097 | 0.373 | 1.2   |
| IL15RA   | 0.092  | 0.296 | 0.312  | 0.755 | 1.097 | 0.324 | 0.298  | 0.766 | 0.614 | 1.958 |

|          |        |       |        |       |       |       |        |       |       |       |
|----------|--------|-------|--------|-------|-------|-------|--------|-------|-------|-------|
| IL15     | -0.246 | 0.298 | -0.824 | 0.41  | 0.782 | 0.233 | -0.934 | 0.35  | 0.436 | 1.403 |
| IL13RA2  | -0.131 | 0.298 | -0.441 | 0.659 | 0.877 | 0.261 | -0.471 | 0.638 | 0.489 | 1.573 |
| IL13RA1  | -0.537 | 0.303 | -1.773 | 0.076 | 0.584 | 0.177 | -2.347 | 0.019 | 0.323 | 1.058 |
| IL13     | 0.14   | 0.296 | 0.472  | 0.637 | 1.15  | 0.341 | 0.441  | 0.659 | 0.644 | 2.056 |
| IL12RB2  | -0.109 | 0.296 | -0.368 | 0.713 | 0.897 | 0.266 | -0.389 | 0.697 | 0.502 | 1.603 |
| IL12RB1  | -0.096 | 0.297 | -0.323 | 0.747 | 0.909 | 0.269 | -0.339 | 0.734 | 0.508 | 1.625 |
| IL12B    | -0.232 | 0.298 | -0.78  | 0.435 | 0.793 | 0.236 | -0.878 | 0.38  | 0.442 | 1.421 |
| IL12A    | 0.284  | 0.298 | 0.953  | 0.341 | 1.328 | 0.395 | 0.83   | 0.407 | 0.741 | 2.38  |
| IL11RA   | -0.048 | 0.295 | -0.162 | 0.871 | 0.953 | 0.281 | -0.166 | 0.868 | 0.535 | 1.7   |
| IL11     | -0.548 | 0.303 | -1.811 | 0.07  | 0.578 | 0.175 | -2.412 | 0.016 | 0.319 | 1.046 |
| IL10RB   | -0.078 | 0.295 | -0.265 | 0.791 | 0.925 | 0.273 | -0.276 | 0.783 | 0.519 | 1.649 |
| IL10RA   | -0.11  | 0.295 | -0.374 | 0.709 | 0.895 | 0.265 | -0.395 | 0.693 | 0.502 | 1.598 |
| IL10     | 0.161  | 0.297 | 0.544  | 0.586 | 1.175 | 0.349 | 0.502  | 0.615 | 0.657 | 2.102 |
| IKZF5    | -0.089 | 0.296 | -0.301 | 0.763 | 0.915 | 0.271 | -0.315 | 0.753 | 0.512 | 1.635 |
| IKZF4    | -0.428 | 0.3   | -1.427 | 0.154 | 0.652 | 0.196 | -1.781 | 0.075 | 0.362 | 1.173 |
| IKZF3    | -0.02  | 0.295 | -0.069 | 0.945 | 0.98  | 0.289 | -0.07  | 0.944 | 0.549 | 1.748 |
| IKZF2    | -0.116 | 0.296 | -0.393 | 0.695 | 0.89  | 0.263 | -0.416 | 0.677 | 0.499 | 1.589 |
| IKZF1    | -0.049 | 0.296 | -0.165 | 0.869 | 0.952 | 0.282 | -0.169 | 0.865 | 0.533 | 1.7   |
| IKBKG    | 0.297  | 0.301 | 0.985  | 0.324 | 1.345 | 0.405 | 0.853  | 0.394 | 0.746 | 2.426 |
| IKBKE    | -0.157 | 0.296 | -0.532 | 0.595 | 0.854 | 0.253 | -0.576 | 0.565 | 0.478 | 1.526 |
| IKBKB    | -0.45  | 0.303 | -1.488 | 0.137 | 0.637 | 0.193 | -1.88  | 0.06  | 0.352 | 1.153 |
| IK       | 0.438  | 0.299 | 1.464  | 0.143 | 1.55  | 0.464 | 1.186  | 0.236 | 0.862 | 2.786 |
| IHH      | 0.391  | 0.298 | 1.313  | 0.189 | 1.479 | 0.441 | 1.086  | 0.277 | 0.825 | 2.652 |
| IGSF9B   | 0.314  | 0.298 | 1.054  | 0.292 | 1.369 | 0.408 | 0.904  | 0.366 | 0.763 | 2.456 |
| IGSF6    | 0.215  | 0.296 | 0.724  | 0.469 | 1.239 | 0.367 | 0.652  | 0.514 | 0.693 | 2.216 |
| IGSF3    | 0.047  | 0.296 | 0.16   | 0.873 | 1.049 | 0.31  | 0.157  | 0.875 | 0.587 | 1.872 |
| IGSF1    | -0.075 | 0.297 | -0.252 | 0.801 | 0.928 | 0.275 | -0.262 | 0.793 | 0.519 | 1.659 |
| IGLV6-57 | -0.35  | 0.298 | -1.173 | 0.241 | 0.705 | 0.21  | -1.404 | 0.16  | 0.393 | 1.265 |
| IGLV1-44 | -0.423 | 0.298 | -1.418 | 0.156 | 0.655 | 0.195 | -1.765 | 0.078 | 0.365 | 1.176 |
| IGLV@    | 0.342  | 0.298 | 1.148  | 0.251 | 1.407 | 0.419 | 0.972  | 0.331 | 0.785 | 2.521 |
| IGLL3P   | -0.323 | 0.298 | -1.083 | 0.279 | 0.724 | 0.216 | -1.278 | 0.201 | 0.403 | 1.299 |
| IGLL1    | 0.066  | 0.296 | 0.224  | 0.823 | 1.069 | 0.317 | 0.216  | 0.829 | 0.598 | 1.91  |
| IGLJ3    | -0.48  | 0.3   | -1.597 | 0.11  | 0.619 | 0.186 | -2.05  | 0.04  | 0.344 | 1.115 |
| IGLC1    | -0.378 | 0.298 | -1.268 | 0.205 | 0.685 | 0.204 | -1.541 | 0.123 | 0.382 | 1.229 |
| IGKC     | -0.399 | 0.299 | -1.336 | 0.181 | 0.671 | 0.2   | -1.642 | 0.101 | 0.374 | 1.205 |
| IGK      | -0.56  | 0.301 | -1.863 | 0.063 | 0.571 | 0.172 | -2.497 | 0.013 | 0.317 | 1.03  |
| IGHV5-78 | -0.295 | 0.298 | -0.99  | 0.322 | 0.745 | 0.222 | -1.151 | 0.25  | 0.416 | 1.335 |
| IGHMBP2  | 0.112  | 0.295 | 0.378  | 0.705 | 1.118 | 0.33  | 0.358  | 0.72  | 0.627 | 1.996 |

|         |        |       |        |       |       |       |        |       |       |       |
|---------|--------|-------|--------|-------|-------|-------|--------|-------|-------|-------|
| IGHM    | -0.39  | 0.299 | -1.305 | 0.192 | 0.677 | 0.202 | -1.596 | 0.111 | 0.377 | 1.216 |
| IGHG1   | -1     | 0.317 | -3.156 | 0.002 | 0.368 | 0.117 | -5.425 | 0     | 0.198 | 0.684 |
| IGHD    | -1.009 | 0.321 | -3.143 | 0.002 | 0.365 | 0.117 | -5.428 | 0     | 0.194 | 0.684 |
| IGH     | -0.738 | 0.31  | -2.381 | 0.017 | 0.478 | 0.148 | -3.522 | 0     | 0.261 | 0.878 |
| IGFLR1  | -0.05  | 0.295 | -0.17  | 0.865 | 0.951 | 0.281 | -0.175 | 0.861 | 0.533 | 1.697 |
| IGFBP7  | -0.594 | 0.303 | -1.963 | 0.05  | 0.552 | 0.167 | -2.681 | 0.007 | 0.305 | 0.999 |
| IGFBP6  | -0.713 | 0.31  | -2.302 | 0.021 | 0.49  | 0.152 | -3.359 | 0.001 | 0.267 | 0.899 |
| IGFBP5  | 0.062  | 0.295 | 0.208  | 0.835 | 1.063 | 0.314 | 0.202  | 0.84  | 0.596 | 1.897 |
| IGFBP4  | -0.681 | 0.306 | -2.226 | 0.026 | 0.506 | 0.155 | -3.189 | 0.001 | 0.278 | 0.922 |
| IGFBP3  | -0.995 | 0.328 | -3.035 | 0.002 | 0.37  | 0.121 | -5.2   | 0     | 0.195 | 0.703 |
| IGFBP2  | -0.051 | 0.298 | -0.171 | 0.864 | 0.95  | 0.283 | -0.176 | 0.861 | 0.53  | 1.704 |
| IGFBP1  | -0.096 | 0.296 | -0.323 | 0.746 | 0.909 | 0.269 | -0.339 | 0.734 | 0.509 | 1.622 |
| IGFALS  | 0.005  | 0.296 | 0.017  | 0.986 | 1.005 | 0.298 | 0.017  | 0.986 | 0.563 | 1.796 |
| IGF2R   | -0.437 | 0.299 | -1.459 | 0.145 | 0.646 | 0.193 | -1.829 | 0.067 | 0.359 | 1.162 |
| IGF2BP3 | 0.185  | 0.296 | 0.625  | 0.532 | 1.203 | 0.356 | 0.57   | 0.568 | 0.673 | 2.15  |
| IGF2BP2 | 0.175  | 0.296 | 0.591  | 0.554 | 1.191 | 0.353 | 0.542  | 0.587 | 0.667 | 2.129 |
| IGF2-AS | 0.325  | 0.297 | 1.095  | 0.274 | 1.384 | 0.411 | 0.935  | 0.35  | 0.774 | 2.475 |
| IGF1R   | 0.013  | 0.297 | 0.045  | 0.964 | 1.014 | 0.301 | 0.045  | 0.964 | 0.567 | 1.813 |
| IGF1    | -0.811 | 0.31  | -2.617 | 0.009 | 0.444 | 0.138 | -4.033 | 0     | 0.242 | 0.816 |
| IGBP1   | -0.591 | 0.306 | -1.935 | 0.053 | 0.554 | 0.169 | -2.638 | 0.008 | 0.304 | 1.008 |
| IFT88   | -0.095 | 0.296 | -0.322 | 0.747 | 0.909 | 0.269 | -0.338 | 0.736 | 0.509 | 1.623 |
| IFT81   | 0.317  | 0.298 | 1.066  | 0.286 | 1.373 | 0.409 | 0.914  | 0.361 | 0.766 | 2.46  |
| IFT74   | 0.134  | 0.299 | 0.448  | 0.654 | 1.143 | 0.342 | 0.419  | 0.675 | 0.636 | 2.053 |
| IFT57   | 0.049  | 0.296 | 0.167  | 0.867 | 1.051 | 0.311 | 0.163  | 0.871 | 0.588 | 1.876 |
| IFT52   | 0.102  | 0.298 | 0.341  | 0.733 | 1.107 | 0.33  | 0.324  | 0.746 | 0.617 | 1.985 |
| IFT46   | -0.921 | 0.322 | -2.863 | 0.004 | 0.398 | 0.128 | -4.699 | 0     | 0.212 | 0.748 |
| IFT27   | -0.265 | 0.298 | -0.891 | 0.373 | 0.767 | 0.228 | -1.02  | 0.308 | 0.428 | 1.375 |
| IFT22   | -0.17  | 0.299 | -0.57  | 0.569 | 0.844 | 0.252 | -0.621 | 0.534 | 0.47  | 1.514 |
| IFT20   | 0.065  | 0.295 | 0.22   | 0.826 | 1.067 | 0.315 | 0.213  | 0.831 | 0.598 | 1.904 |
| IFT140  | -0.574 | 0.306 | -1.879 | 0.06  | 0.563 | 0.172 | -2.538 | 0.011 | 0.309 | 1.025 |
| IFT122  | -0.313 | 0.301 | -1.04  | 0.298 | 0.731 | 0.22  | -1.221 | 0.222 | 0.406 | 1.319 |
| IFRD2   | -0.349 | 0.298 | -1.17  | 0.242 | 0.706 | 0.21  | -1.399 | 0.162 | 0.394 | 1.266 |
| IFRD1   | 0.05   | 0.297 | 0.169  | 0.866 | 1.051 | 0.312 | 0.165  | 0.869 | 0.587 | 1.883 |
| IFNW1   | 0.38   | 0.3   | 1.269  | 0.204 | 1.463 | 0.438 | 1.056  | 0.291 | 0.813 | 2.631 |
| IFNGR2  | 0.357  | 0.298 | 1.199  | 0.231 | 1.429 | 0.425 | 1.008  | 0.313 | 0.797 | 2.561 |
| IFNGR1  | -0.516 | 0.302 | -1.706 | 0.088 | 0.597 | 0.18  | -2.233 | 0.026 | 0.33  | 1.08  |
| IFNG    | 0.382  | 0.302 | 1.264  | 0.206 | 1.465 | 0.443 | 1.05   | 0.294 | 0.81  | 2.651 |
| IFNB1   | 0.637  | 0.306 | 2.082  | 0.037 | 1.891 | 0.579 | 1.54   | 0.124 | 1.038 | 3.445 |

|          |        |       |        |       |       |       |        |       |       |       |
|----------|--------|-------|--------|-------|-------|-------|--------|-------|-------|-------|
| IFNAR2   | -0.55  | 0.303 | -1.818 | 0.069 | 0.577 | 0.175 | -2.425 | 0.015 | 0.319 | 1.044 |
| IFNAR1   | 0.171  | 0.296 | 0.577  | 0.564 | 1.186 | 0.351 | 0.53   | 0.596 | 0.664 | 2.12  |
| IFNA8    | 0.226  | 0.296 | 0.764  | 0.445 | 1.254 | 0.372 | 0.683  | 0.494 | 0.702 | 2.241 |
| IFNA7    | -0.029 | 0.295 | -0.099 | 0.921 | 0.971 | 0.287 | -0.1   | 0.92  | 0.544 | 1.733 |
| IFNA5    | -0.59  | 0.303 | -1.946 | 0.052 | 0.554 | 0.168 | -2.652 | 0.008 | 0.306 | 1.004 |
| IFNA4    | -0.315 | 0.3   | -1.051 | 0.293 | 0.73  | 0.219 | -1.235 | 0.217 | 0.405 | 1.314 |
| IFNA21   | -0.149 | 0.296 | -0.505 | 0.614 | 0.861 | 0.255 | -0.544 | 0.586 | 0.482 | 1.538 |
| IFNA2    | 0.532  | 0.302 | 1.759  | 0.079 | 1.702 | 0.515 | 1.364  | 0.172 | 0.941 | 3.08  |
| IFNA17   | -0.089 | 0.296 | -0.302 | 0.763 | 0.915 | 0.271 | -0.316 | 0.752 | 0.512 | 1.634 |
| IFNA16   | 0.117  | 0.296 | 0.397  | 0.691 | 1.124 | 0.332 | 0.375  | 0.708 | 0.63  | 2.007 |
| IFNA14   | 0.519  | 0.302 | 1.716  | 0.086 | 1.68  | 0.508 | 1.339  | 0.181 | 0.929 | 3.038 |
| IFNA10   | 0.295  | 0.296 | 0.995  | 0.32  | 1.343 | 0.398 | 0.862  | 0.389 | 0.751 | 2.401 |
| IFNA1    | -0.159 | 0.296 | -0.536 | 0.592 | 0.853 | 0.252 | -0.581 | 0.561 | 0.478 | 1.524 |
| IFITM3   | 0.145  | 0.297 | 0.489  | 0.625 | 1.156 | 0.343 | 0.455  | 0.649 | 0.646 | 2.069 |
| IFITM2   | -0.082 | 0.295 | -0.279 | 0.78  | 0.921 | 0.272 | -0.291 | 0.771 | 0.516 | 1.643 |
| IFITM1   | 0.298  | 0.298 | 1.002  | 0.316 | 1.348 | 0.401 | 0.866  | 0.386 | 0.752 | 2.415 |
| IFIT5    | -0.115 | 0.296 | -0.388 | 0.698 | 0.892 | 0.263 | -0.411 | 0.681 | 0.5   | 1.591 |
| IFIT3    | 0.181  | 0.296 | 0.612  | 0.541 | 1.199 | 0.355 | 0.559  | 0.576 | 0.671 | 2.143 |
| IFIT2    | 0.125  | 0.297 | 0.421  | 0.673 | 1.133 | 0.336 | 0.396  | 0.692 | 0.633 | 2.027 |
| IFIT1    | 0.237  | 0.298 | 0.796  | 0.426 | 1.267 | 0.377 | 0.708  | 0.479 | 0.707 | 2.271 |
| IFIH1    | 0.303  | 0.298 | 1.017  | 0.309 | 1.354 | 0.403 | 0.878  | 0.38  | 0.755 | 2.428 |
| IFI6     | 0.088  | 0.296 | 0.299  | 0.765 | 1.092 | 0.323 | 0.286  | 0.775 | 0.612 | 1.95  |
| IFI44L   | 0.097  | 0.296 | 0.326  | 0.744 | 1.101 | 0.326 | 0.311  | 0.756 | 0.617 | 1.966 |
| IFI44    | 0.4    | 0.3   | 1.334  | 0.182 | 1.492 | 0.448 | 1.099  | 0.272 | 0.829 | 2.686 |
| IFI35    | 0.256  | 0.297 | 0.86   | 0.39  | 1.291 | 0.384 | 0.759  | 0.448 | 0.721 | 2.311 |
| IFI27    | 0.43   | 0.303 | 1.422  | 0.155 | 1.538 | 0.465 | 1.156  | 0.248 | 0.85  | 2.782 |
| IFI16    | -0.59  | 0.303 | -1.949 | 0.051 | 0.554 | 0.168 | -2.656 | 0.008 | 0.306 | 1.003 |
| IFFO1    | -0.422 | 0.3   | -1.408 | 0.159 | 0.656 | 0.197 | -1.751 | 0.08  | 0.365 | 1.18  |
| IER5     | 0.447  | 0.302 | 1.478  | 0.139 | 1.563 | 0.472 | 1.192  | 0.233 | 0.865 | 2.827 |
| IER3IP1  | 0.361  | 0.297 | 1.217  | 0.224 | 1.435 | 0.427 | 1.021  | 0.307 | 0.802 | 2.57  |
| IER3     | 0.221  | 0.296 | 0.746  | 0.455 | 1.247 | 0.369 | 0.67   | 0.503 | 0.698 | 2.227 |
| IER2     | 0.19   | 0.296 | 0.642  | 0.521 | 1.209 | 0.358 | 0.584  | 0.559 | 0.677 | 2.161 |
| IDUA     | -0.441 | 0.3   | -1.471 | 0.141 | 0.644 | 0.193 | -1.849 | 0.065 | 0.358 | 1.158 |
| IDS      | -0.059 | 0.296 | -0.2   | 0.842 | 0.943 | 0.279 | -0.206 | 0.837 | 0.528 | 1.682 |
| IDO1     | 0.281  | 0.301 | 0.934  | 0.35  | 1.324 | 0.398 | 0.814  | 0.416 | 0.735 | 2.387 |
| IDI2-AS1 | 0.185  | 0.296 | 0.627  | 0.531 | 1.204 | 0.356 | 0.572  | 0.567 | 0.674 | 2.148 |
| IDI1     | 0.375  | 0.298 | 1.261  | 0.207 | 1.456 | 0.433 | 1.052  | 0.293 | 0.812 | 2.609 |
| IDH3G    | -0.236 | 0.3   | -0.785 | 0.433 | 0.79  | 0.237 | -0.885 | 0.376 | 0.439 | 1.423 |

|        |        |       |        |       |       |       |        |       |       |       |
|--------|--------|-------|--------|-------|-------|-------|--------|-------|-------|-------|
| IDH3B  | 0.091  | 0.295 | 0.308  | 0.758 | 1.095 | 0.324 | 0.295  | 0.768 | 0.614 | 1.954 |
| IDH3A  | 0.136  | 0.295 | 0.462  | 0.644 | 1.146 | 0.339 | 0.432  | 0.666 | 0.642 | 2.045 |
| IDH2   | 0.253  | 0.298 | 0.85   | 0.395 | 1.288 | 0.384 | 0.751  | 0.453 | 0.719 | 2.31  |
| IDH1   | 0.18   | 0.298 | 0.603  | 0.546 | 1.197 | 0.356 | 0.552  | 0.581 | 0.668 | 2.145 |
| IDE    | -0.209 | 0.298 | -0.701 | 0.483 | 0.812 | 0.242 | -0.78  | 0.436 | 0.453 | 1.455 |
| ID4    | -0.372 | 0.298 | -1.248 | 0.212 | 0.69  | 0.205 | -1.511 | 0.131 | 0.385 | 1.236 |
| ID3    | -0.833 | 0.315 | -2.647 | 0.008 | 0.435 | 0.137 | -4.133 | 0     | 0.235 | 0.805 |
| ID2B   | 0.243  | 0.296 | 0.821  | 0.412 | 1.275 | 0.378 | 0.729  | 0.466 | 0.714 | 2.279 |
| ID2    | -0.258 | 0.298 | -0.868 | 0.386 | 0.772 | 0.23  | -0.99  | 0.322 | 0.431 | 1.384 |
| ID1    | -0.44  | 0.3   | -1.47  | 0.142 | 0.644 | 0.193 | -1.847 | 0.065 | 0.358 | 1.158 |
| ICOSLG | -0.072 | 0.299 | -0.24  | 0.811 | 0.931 | 0.278 | -0.248 | 0.804 | 0.518 | 1.672 |
| ICOS   | 0.253  | 0.298 | 0.848  | 0.396 | 1.288 | 0.384 | 0.75   | 0.453 | 0.718 | 2.308 |
| ICMT   | 0.056  | 0.295 | 0.191  | 0.848 | 1.058 | 0.312 | 0.186  | 0.852 | 0.593 | 1.887 |
| ICE2   | -0.473 | 0.306 | -1.547 | 0.122 | 0.623 | 0.191 | -1.978 | 0.048 | 0.342 | 1.135 |
| ICE1   | 0.366  | 0.298 | 1.231  | 0.218 | 1.442 | 0.429 | 1.031  | 0.303 | 0.805 | 2.584 |
| ICAM5  | -0.21  | 0.298 | -0.705 | 0.481 | 0.811 | 0.241 | -0.784 | 0.433 | 0.453 | 1.453 |
| ICAM4  | -0.501 | 0.303 | -1.654 | 0.098 | 0.606 | 0.183 | -2.147 | 0.032 | 0.335 | 1.097 |
| ICAM3  | 0.351  | 0.299 | 1.172  | 0.241 | 1.42  | 0.425 | 0.989  | 0.323 | 0.79  | 2.553 |
| ICAM2  | -0.679 | 0.306 | -2.218 | 0.027 | 0.507 | 0.155 | -3.175 | 0.001 | 0.278 | 0.924 |
| ICAM1  | -0.187 | 0.296 | -0.63  | 0.529 | 0.83  | 0.246 | -0.692 | 0.489 | 0.464 | 1.483 |
| ICA1   | -0.165 | 0.299 | -0.553 | 0.58  | 0.848 | 0.253 | -0.602 | 0.547 | 0.472 | 1.523 |
| IBTK   | -0.496 | 0.302 | -1.641 | 0.101 | 0.609 | 0.184 | -2.125 | 0.034 | 0.337 | 1.101 |
| IBSP   | 0.194  | 0.295 | 0.656  | 0.512 | 1.214 | 0.359 | 0.597  | 0.551 | 0.68  | 2.166 |
| IBA57  | -0.07  | 0.295 | -0.235 | 0.814 | 0.933 | 0.275 | -0.244 | 0.807 | 0.523 | 1.664 |
| IARS2  | -0.003 | 0.296 | -0.009 | 0.992 | 0.997 | 0.295 | -0.009 | 0.992 | 0.558 | 1.781 |
| IARS1  | 0.321  | 0.3   | 1.071  | 0.284 | 1.379 | 0.413 | 0.916  | 0.36  | 0.766 | 2.481 |
| IAPP   | -0.278 | 0.297 | -0.938 | 0.348 | 0.757 | 0.225 | -1.081 | 0.28  | 0.423 | 1.354 |
| HYOU1  | -0.43  | 0.3   | -1.431 | 0.152 | 0.651 | 0.195 | -1.788 | 0.074 | 0.361 | 1.172 |
| HYMAI  | -0.419 | 0.3   | -1.4   | 0.162 | 0.657 | 0.197 | -1.739 | 0.082 | 0.365 | 1.183 |
| HYI    | -0.223 | 0.296 | -0.751 | 0.453 | 0.8   | 0.237 | -0.841 | 0.4   | 0.448 | 1.431 |
| HYAL4  | -0.447 | 0.3   | -1.491 | 0.136 | 0.639 | 0.192 | -1.88  | 0.06  | 0.355 | 1.151 |
| HYAL3  | -0.127 | 0.297 | -0.427 | 0.669 | 0.881 | 0.261 | -0.455 | 0.649 | 0.492 | 1.576 |
| HYAL2  | -0.739 | 0.31  | -2.383 | 0.017 | 0.478 | 0.148 | -3.527 | 0     | 0.26  | 0.877 |
| HYAL1  | 0.117  | 0.296 | 0.396  | 0.692 | 1.124 | 0.332 | 0.374  | 0.709 | 0.63  | 2.007 |
| HUWE1  | -0.354 | 0.3   | -1.18  | 0.238 | 0.702 | 0.211 | -1.415 | 0.157 | 0.39  | 1.264 |
| HUS1   | -0.122 | 0.296 | -0.413 | 0.68  | 0.885 | 0.262 | -0.439 | 0.661 | 0.495 | 1.581 |
| HUNK   | 0.039  | 0.295 | 0.133  | 0.894 | 1.04  | 0.307 | 0.131  | 0.896 | 0.583 | 1.854 |
| HTT    | 0.482  | 0.299 | 1.614  | 0.107 | 1.62  | 0.484 | 1.281  | 0.2   | 0.902 | 2.91  |

|         |        |       |        |       |       |       |        |       |       |       |
|---------|--------|-------|--------|-------|-------|-------|--------|-------|-------|-------|
| HTRA2   | -0.082 | 0.295 | -0.278 | 0.781 | 0.921 | 0.272 | -0.289 | 0.772 | 0.516 | 1.644 |
| HTRA1   | -0.513 | 0.302 | -1.696 | 0.09  | 0.599 | 0.181 | -2.216 | 0.027 | 0.331 | 1.083 |
| HTR7P1  | -0.192 | 0.298 | -0.646 | 0.519 | 0.825 | 0.246 | -0.712 | 0.476 | 0.46  | 1.48  |
| HTR7    | 0.528  | 0.301 | 1.755  | 0.079 | 1.696 | 0.51  | 1.364  | 0.173 | 0.94  | 3.057 |
| HTR6    | 0.661  | 0.306 | 2.163  | 0.031 | 1.937 | 0.592 | 1.583  | 0.113 | 1.064 | 3.526 |
| HTR5A   | -0.118 | 0.297 | -0.397 | 0.691 | 0.889 | 0.264 | -0.422 | 0.673 | 0.497 | 1.59  |
| HTR4    | 0.348  | 0.3   | 1.163  | 0.245 | 1.417 | 0.424 | 0.982  | 0.326 | 0.788 | 2.549 |
| HTR3B   | 0.224  | 0.296 | 0.755  | 0.45  | 1.251 | 0.37  | 0.677  | 0.499 | 0.7   | 2.235 |
| HTR3A   | 0.252  | 0.296 | 0.852  | 0.394 | 1.287 | 0.381 | 0.753  | 0.452 | 0.72  | 2.3   |
| HTR2C   | 0.78   | 0.311 | 2.512  | 0.012 | 2.182 | 0.678 | 1.744  | 0.081 | 1.187 | 4.011 |
| HTR2B   | -0.591 | 0.306 | -1.932 | 0.053 | 0.554 | 0.169 | -2.634 | 0.008 | 0.304 | 1.009 |
| HTR2A   | 0.058  | 0.297 | 0.195  | 0.845 | 1.06  | 0.315 | 0.19   | 0.85  | 0.592 | 1.897 |
| HTR1F   | 0      | 0.295 | 0.001  | 0.999 | 1     | 0.295 | 0.001  | 0.999 | 0.561 | 1.785 |
| HTR1E   | 0.12   | 0.296 | 0.407  | 0.684 | 1.128 | 0.334 | 0.384  | 0.701 | 0.632 | 2.014 |
| HTR1D   | 0.334  | 0.3   | 1.115  | 0.265 | 1.397 | 0.419 | 0.948  | 0.343 | 0.776 | 2.513 |
| HTR1B   | -0.206 | 0.297 | -0.694 | 0.488 | 0.814 | 0.241 | -0.77  | 0.441 | 0.455 | 1.456 |
| HTR1A   | -0.485 | 0.3   | -1.616 | 0.106 | 0.616 | 0.185 | -2.08  | 0.038 | 0.342 | 1.109 |
| HTN3    | -0.253 | 0.296 | -0.854 | 0.393 | 0.777 | 0.23  | -0.971 | 0.331 | 0.435 | 1.388 |
| HTN1    | 0.076  | 0.296 | 0.256  | 0.798 | 1.079 | 0.319 | 0.247  | 0.805 | 0.604 | 1.925 |
| HTATSF1 | 1.232  | 0.346 | 3.56   | 0     | 3.427 | 1.186 | 2.047  | 0.041 | 1.739 | 6.752 |
| HTATIP2 | 0.88   | 0.315 | 2.791  | 0.005 | 2.41  | 0.76  | 1.857  | 0.063 | 1.3   | 4.47  |
| HSPH1   | 0.332  | 0.303 | 1.095  | 0.273 | 1.394 | 0.423 | 0.932  | 0.351 | 0.769 | 2.525 |
| HSPG2   | -0.391 | 0.297 | -1.315 | 0.189 | 0.677 | 0.201 | -1.609 | 0.108 | 0.378 | 1.211 |
| HSPE1   | 0.347  | 0.298 | 1.167  | 0.243 | 1.415 | 0.421 | 0.986  | 0.324 | 0.79  | 2.536 |
| HSPD1   | 0.543  | 0.307 | 1.77   | 0.077 | 1.721 | 0.528 | 1.366  | 0.172 | 0.943 | 3.14  |
| HSPBP1  | 0.103  | 0.295 | 0.348  | 0.728 | 1.108 | 0.327 | 0.33   | 0.741 | 0.621 | 1.976 |
| HSPBAP1 | 0.056  | 0.298 | 0.188  | 0.851 | 1.058 | 0.315 | 0.183  | 0.855 | 0.59  | 1.897 |
| HSPB8   | -0.096 | 0.296 | -0.325 | 0.745 | 0.908 | 0.269 | -0.342 | 0.733 | 0.508 | 1.623 |
| HSPB7   | -0.635 | 0.306 | -2.076 | 0.038 | 0.53  | 0.162 | -2.901 | 0.004 | 0.291 | 0.965 |
| HSPB6   | -0.113 | 0.296 | -0.381 | 0.703 | 0.893 | 0.264 | -0.404 | 0.687 | 0.5   | 1.595 |
| HSPB3   | 0.07   | 0.295 | 0.237  | 0.813 | 1.072 | 0.317 | 0.229  | 0.819 | 0.601 | 1.913 |
| HSPB2   | 0.015  | 0.295 | 0.05   | 0.96  | 1.015 | 0.3   | 0.05   | 0.96  | 0.569 | 1.81  |
| HSPB11  | -0.148 | 0.296 | -0.501 | 0.617 | 0.862 | 0.255 | -0.54  | 0.589 | 0.482 | 1.541 |
| HSPB1   | 0.08   | 0.295 | 0.272  | 0.785 | 1.084 | 0.32  | 0.262  | 0.794 | 0.608 | 1.932 |
| HSPA9   | 0.712  | 0.31  | 2.3    | 0.021 | 2.039 | 0.632 | 1.645  | 0.1   | 1.111 | 3.741 |
| HSPA6   | 0.172  | 0.296 | 0.583  | 0.56  | 1.188 | 0.351 | 0.535  | 0.592 | 0.666 | 2.12  |
| HSPA5   | -0.215 | 0.296 | -0.725 | 0.468 | 0.807 | 0.239 | -0.809 | 0.419 | 0.451 | 1.442 |
| HSPA4L  | -0.152 | 0.296 | -0.512 | 0.609 | 0.859 | 0.254 | -0.553 | 0.58  | 0.481 | 1.535 |

|          |        |       |        |       |       |       |        |       |       |       |
|----------|--------|-------|--------|-------|-------|-------|--------|-------|-------|-------|
| HSPA4    | -0.013 | 0.296 | -0.043 | 0.965 | 0.987 | 0.292 | -0.044 | 0.965 | 0.553 | 1.763 |
| HSPA2    | -0.487 | 0.302 | -1.613 | 0.107 | 0.614 | 0.186 | -2.078 | 0.038 | 0.34  | 1.111 |
| HSPA1L   | -0.318 | 0.299 | -1.065 | 0.287 | 0.728 | 0.217 | -1.253 | 0.21  | 0.405 | 1.306 |
| HSPA14   | 0.66   | 0.303 | 2.176  | 0.03  | 1.935 | 0.587 | 1.593  | 0.111 | 1.068 | 3.507 |
| HSPA13   | 0.201  | 0.296 | 0.68   | 0.497 | 1.223 | 0.361 | 0.616  | 0.538 | 0.685 | 2.182 |
| HSPA12A  | -0.242 | 0.297 | -0.814 | 0.416 | 0.785 | 0.234 | -0.921 | 0.357 | 0.438 | 1.406 |
| HSP90B1  | -0.677 | 0.31  | -2.185 | 0.029 | 0.508 | 0.157 | -3.124 | 0.002 | 0.277 | 0.933 |
| HSP90AB1 | 0.174  | 0.297 | 0.586  | 0.558 | 1.19  | 0.354 | 0.538  | 0.591 | 0.665 | 2.132 |
| HSP90AA1 | 0.679  | 0.31  | 2.192  | 0.028 | 1.972 | 0.611 | 1.591  | 0.112 | 1.075 | 3.618 |
| HSF4     | 0.321  | 0.297 | 1.078  | 0.281 | 1.378 | 0.41  | 0.922  | 0.356 | 0.769 | 2.468 |
| HSF2BP   | 0.383  | 0.3   | 1.278  | 0.201 | 1.467 | 0.439 | 1.062  | 0.288 | 0.815 | 2.639 |
| HSF2     | 0.304  | 0.297 | 1.025  | 0.305 | 1.356 | 0.402 | 0.884  | 0.377 | 0.758 | 2.425 |
| HSF1     | 0.299  | 0.3   | 0.996  | 0.319 | 1.348 | 0.405 | 0.861  | 0.389 | 0.749 | 2.428 |
| HSDL2    | 0.01   | 0.295 | 0.034  | 0.973 | 1.01  | 0.298 | 0.034  | 0.973 | 0.567 | 1.801 |
| HSD3B2   | -0.324 | 0.3   | -1.079 | 0.28  | 0.723 | 0.217 | -1.275 | 0.202 | 0.402 | 1.302 |
| HSD3B1   | -0.048 | 0.296 | -0.163 | 0.87  | 0.953 | 0.282 | -0.167 | 0.867 | 0.534 | 1.701 |
| HSD17B8  | 0.469  | 0.3   | 1.565  | 0.118 | 1.599 | 0.479 | 1.249  | 0.212 | 0.888 | 2.877 |
| HSD17B7  | 0.213  | 0.296 | 0.721  | 0.471 | 1.238 | 0.367 | 0.649  | 0.516 | 0.693 | 2.212 |
| HSD17B6  | -0.29  | 0.3   | -0.966 | 0.334 | 0.749 | 0.224 | -1.12  | 0.263 | 0.416 | 1.347 |
| HSD17B4  | -0.457 | 0.307 | -1.488 | 0.137 | 0.633 | 0.194 | -1.887 | 0.059 | 0.347 | 1.156 |
| HSD17B3  | -0.128 | 0.296 | -0.432 | 0.666 | 0.88  | 0.261 | -0.461 | 0.645 | 0.492 | 1.572 |
| HSD17B2  | -0.291 | 0.296 | -0.983 | 0.326 | 0.747 | 0.222 | -1.141 | 0.254 | 0.418 | 1.336 |
| HSD17B14 | 0.241  | 0.296 | 0.814  | 0.416 | 1.273 | 0.377 | 0.723  | 0.47  | 0.712 | 2.275 |
| HSD17B12 | 0.079  | 0.296 | 0.267  | 0.79  | 1.082 | 0.32  | 0.257  | 0.798 | 0.606 | 1.932 |
| HSD17B11 | -0.471 | 0.3   | -1.572 | 0.116 | 0.624 | 0.187 | -2.008 | 0.045 | 0.347 | 1.123 |
| HSD17B10 | 0.768  | 0.307 | 2.502  | 0.012 | 2.156 | 0.662 | 1.746  | 0.081 | 1.181 | 3.936 |
| HSD17B1  | 0.625  | 0.306 | 2.044  | 0.041 | 1.868 | 0.571 | 1.52   | 0.129 | 1.026 | 3.4   |
| HSD11B2  | -0.13  | 0.296 | -0.439 | 0.661 | 0.878 | 0.26  | -0.469 | 0.639 | 0.492 | 1.569 |
| HSD11B1  | -0.338 | 0.298 | -1.135 | 0.256 | 0.713 | 0.212 | -1.351 | 0.177 | 0.398 | 1.279 |
| HSBP1    | 0.687  | 0.304 | 2.261  | 0.024 | 1.987 | 0.603 | 1.636  | 0.102 | 1.096 | 3.603 |
| HS6ST1   | 0.227  | 0.295 | 0.768  | 0.442 | 1.255 | 0.371 | 0.687  | 0.492 | 0.703 | 2.238 |
| HS3ST3B1 | 0.462  | 0.3   | 1.541  | 0.123 | 1.587 | 0.475 | 1.234  | 0.217 | 0.882 | 2.855 |
| HS3ST3A1 | -0.612 | 0.306 | -2.002 | 0.045 | 0.542 | 0.166 | -2.762 | 0.006 | 0.298 | 0.987 |
| HS3ST2   | 0.644  | 0.306 | 2.106  | 0.035 | 1.904 | 0.582 | 1.553  | 0.121 | 1.046 | 3.467 |
| HS3ST1   | 0.41   | 0.3   | 1.368  | 0.171 | 1.507 | 0.452 | 1.122  | 0.262 | 0.837 | 2.714 |
| HS2ST1   | 0.463  | 0.3   | 1.545  | 0.122 | 1.589 | 0.476 | 1.237  | 0.216 | 0.883 | 2.859 |
| HS1BP3   | 0.019  | 0.296 | 0.065  | 0.948 | 1.019 | 0.301 | 0.064  | 0.949 | 0.571 | 1.82  |
| HROB     | 0.269  | 0.296 | 0.908  | 0.364 | 1.309 | 0.388 | 0.796  | 0.426 | 0.732 | 2.339 |

|        |        |       |        |       |       |       |        |       |       |       |
|--------|--------|-------|--------|-------|-------|-------|--------|-------|-------|-------|
| HRK    | 0.188  | 0.296 | 0.635  | 0.526 | 1.207 | 0.357 | 0.579  | 0.563 | 0.675 | 2.156 |
| HRH4   | 0.459  | 0.3   | 1.53   | 0.126 | 1.582 | 0.474 | 1.227  | 0.22  | 0.879 | 2.846 |
| HRH3   | 0.277  | 0.3   | 0.924  | 0.355 | 1.32  | 0.396 | 0.807  | 0.42  | 0.733 | 2.377 |
| HRH2   | -0.19  | 0.296 | -0.641 | 0.521 | 0.827 | 0.245 | -0.706 | 0.48  | 0.463 | 1.478 |
| HRH1   | -0.132 | 0.295 | -0.448 | 0.654 | 0.876 | 0.259 | -0.479 | 0.632 | 0.491 | 1.563 |
| HRG    | -0.077 | 0.296 | -0.259 | 0.796 | 0.926 | 0.274 | -0.269 | 0.788 | 0.518 | 1.655 |
| HRC    | -0.431 | 0.298 | -1.448 | 0.148 | 0.65  | 0.193 | -1.81  | 0.07  | 0.363 | 1.165 |
| HRAS   | 0.098  | 0.296 | 0.332  | 0.74  | 1.104 | 0.327 | 0.317  | 0.752 | 0.617 | 1.972 |
| HR     | 0.474  | 0.302 | 1.567  | 0.117 | 1.606 | 0.485 | 1.248  | 0.212 | 0.888 | 2.903 |
| HPX    | 0.065  | 0.295 | 0.22   | 0.826 | 1.067 | 0.315 | 0.213  | 0.831 | 0.598 | 1.904 |
| HPSE2  | 0.85   | 0.316 | 2.691  | 0.007 | 2.34  | 0.739 | 1.812  | 0.07  | 1.26  | 4.346 |
| HPSE   | 0.679  | 0.306 | 2.222  | 0.026 | 1.972 | 0.603 | 1.613  | 0.107 | 1.083 | 3.59  |
| HPS6   | 0.503  | 0.302 | 1.664  | 0.096 | 1.654 | 0.5   | 1.307  | 0.191 | 0.914 | 2.991 |
| HPS5   | -0.394 | 0.301 | -1.308 | 0.191 | 0.674 | 0.203 | -1.603 | 0.109 | 0.374 | 1.217 |
| HPS4   | -0.224 | 0.296 | -0.755 | 0.45  | 0.799 | 0.237 | -0.846 | 0.397 | 0.447 | 1.429 |
| HPS1   | 0.513  | 0.302 | 1.695  | 0.09  | 1.67  | 0.505 | 1.326  | 0.185 | 0.923 | 3.02  |
| HPRT1  | 0.11   | 0.295 | 0.373  | 0.709 | 1.116 | 0.329 | 0.353  | 0.724 | 0.626 | 1.991 |
| HPR    | 0.272  | 0.296 | 0.916  | 0.359 | 1.312 | 0.389 | 0.802  | 0.422 | 0.734 | 2.346 |
| HPN    | -0.525 | 0.311 | -1.688 | 0.091 | 0.592 | 0.184 | -2.219 | 0.026 | 0.322 | 1.088 |
| HPGDS  | -0.342 | 0.3   | -1.139 | 0.255 | 0.711 | 0.213 | -1.358 | 0.174 | 0.395 | 1.279 |
| HPGD   | -0.647 | 0.306 | -2.112 | 0.035 | 0.524 | 0.16  | -2.969 | 0.003 | 0.287 | 0.955 |
| HPF1   | 0.303  | 0.297 | 1.022  | 0.307 | 1.354 | 0.402 | 0.882  | 0.378 | 0.757 | 2.422 |
| HPD    | -0.383 | 0.298 | -1.284 | 0.199 | 0.682 | 0.203 | -1.565 | 0.118 | 0.38  | 1.223 |
| HPCAL4 | 0.062  | 0.295 | 0.209  | 0.835 | 1.063 | 0.314 | 0.202  | 0.84  | 0.596 | 1.896 |
| HPCAL1 | 0.062  | 0.295 | 0.209  | 0.834 | 1.064 | 0.314 | 0.203  | 0.839 | 0.596 | 1.898 |
| HPCA   | -0.022 | 0.295 | -0.073 | 0.941 | 0.979 | 0.289 | -0.074 | 0.941 | 0.548 | 1.746 |
| HP1BP3 | -0.607 | 0.31  | -1.959 | 0.05  | 0.545 | 0.169 | -2.696 | 0.007 | 0.297 | 1     |
| HP     | -0.021 | 0.295 | -0.072 | 0.942 | 0.979 | 0.289 | -0.073 | 0.942 | 0.549 | 1.746 |
| HOXD9  | -0.413 | 0.3   | -1.378 | 0.168 | 0.662 | 0.198 | -1.706 | 0.088 | 0.368 | 1.191 |
| HOXD4  | -0.476 | 0.3   | -1.589 | 0.112 | 0.621 | 0.186 | -2.035 | 0.042 | 0.345 | 1.118 |
| HOXD13 | -0.106 | 0.296 | -0.36  | 0.719 | 0.899 | 0.266 | -0.38  | 0.704 | 0.504 | 1.605 |
| HOXD12 | -0.002 | 0.295 | -0.005 | 0.996 | 0.998 | 0.295 | -0.005 | 0.996 | 0.56  | 1.782 |
| HOXD11 | 0.257  | 0.298 | 0.862  | 0.388 | 1.293 | 0.385 | 0.761  | 0.447 | 0.721 | 2.317 |
| HOXD10 | -0.039 | 0.295 | -0.132 | 0.895 | 0.962 | 0.284 | -0.134 | 0.893 | 0.539 | 1.716 |
| HOXD1  | -0.061 | 0.296 | -0.207 | 0.836 | 0.941 | 0.279 | -0.213 | 0.831 | 0.526 | 1.682 |
| HOXC8  | 0.547  | 0.306 | 1.789  | 0.074 | 1.728 | 0.528 | 1.378  | 0.168 | 0.949 | 3.145 |
| HOXC6  | 0.04   | 0.298 | 0.133  | 0.894 | 1.04  | 0.31  | 0.13   | 0.896 | 0.581 | 1.864 |
| HOXC5  | -0.002 | 0.295 | -0.007 | 0.994 | 0.998 | 0.295 | -0.007 | 0.994 | 0.56  | 1.78  |



|          |        |       |        |       |       |       |        |       |       |       |
|----------|--------|-------|--------|-------|-------|-------|--------|-------|-------|-------|
| HOXC4    | 0.406  | 0.303 | 1.341  | 0.18  | 1.501 | 0.455 | 1.102  | 0.271 | 0.829 | 2.719 |
| HOXC13   | 0.541  | 0.302 | 1.791  | 0.073 | 1.719 | 0.52  | 1.383  | 0.167 | 0.95  | 3.108 |
| HOXC11   | 0.23   | 0.298 | 0.77   | 0.441 | 1.258 | 0.375 | 0.688  | 0.491 | 0.701 | 2.258 |
| HOXC10   | -0.304 | 0.297 | -1.023 | 0.306 | 0.738 | 0.219 | -1.196 | 0.232 | 0.412 | 1.321 |
| HOXB9    | 0.336  | 0.3   | 1.121  | 0.262 | 1.4   | 0.42  | 0.952  | 0.341 | 0.778 | 2.518 |
| HOXB8    | 0.049  | 0.296 | 0.165  | 0.869 | 1.05  | 0.31  | 0.161  | 0.872 | 0.588 | 1.874 |
| HOXB7    | 0.086  | 0.295 | 0.29   | 0.771 | 1.09  | 0.322 | 0.278  | 0.781 | 0.611 | 1.944 |
| HOXB6    | 0.302  | 0.298 | 1.014  | 0.31  | 1.352 | 0.402 | 0.876  | 0.381 | 0.755 | 2.423 |
| HOXB5    | 0.106  | 0.297 | 0.357  | 0.721 | 1.112 | 0.33  | 0.339  | 0.735 | 0.622 | 1.988 |
| HOXB3    | -0.201 | 0.296 | -0.678 | 0.498 | 0.818 | 0.242 | -0.751 | 0.453 | 0.458 | 1.462 |
| HOXB2    | 0.206  | 0.296 | 0.697  | 0.486 | 1.229 | 0.364 | 0.629  | 0.529 | 0.688 | 2.196 |
| HOXB13   | -0.003 | 0.295 | -0.01  | 0.992 | 0.997 | 0.295 | -0.01  | 0.992 | 0.559 | 1.779 |
| HOXB1    | 0.327  | 0.3   | 1.092  | 0.275 | 1.387 | 0.416 | 0.931  | 0.352 | 0.771 | 2.496 |
| HOXA7    | -0.091 | 0.296 | -0.308 | 0.758 | 0.913 | 0.27  | -0.323 | 0.747 | 0.511 | 1.631 |
| HOXA6    | 0.297  | 0.297 | 1.001  | 0.317 | 1.346 | 0.399 | 0.866  | 0.387 | 0.752 | 2.408 |
| HOXA5    | -0.163 | 0.296 | -0.55  | 0.582 | 0.85  | 0.251 | -0.598 | 0.55  | 0.476 | 1.517 |
| HOXA4    | 0.018  | 0.295 | 0.06   | 0.952 | 1.018 | 0.301 | 0.06   | 0.952 | 0.57  | 1.817 |
| HOXA3    | -0.118 | 0.299 | -0.395 | 0.693 | 0.889 | 0.265 | -0.419 | 0.675 | 0.495 | 1.596 |
| HOXA2    | 0.239  | 0.298 | 0.804  | 0.421 | 1.271 | 0.378 | 0.715  | 0.474 | 0.709 | 2.277 |
| HOXA11   | -0.241 | 0.297 | -0.81  | 0.418 | 0.786 | 0.234 | -0.916 | 0.359 | 0.439 | 1.407 |
| HOXA10   | -0.043 | 0.295 | -0.144 | 0.885 | 0.958 | 0.283 | -0.147 | 0.883 | 0.537 | 1.71  |
| HOXA1    | -0.174 | 0.298 | -0.584 | 0.559 | 0.84  | 0.251 | -0.638 | 0.523 | 0.468 | 1.507 |
| HOPX     | -0.344 | 0.298 | -1.155 | 0.248 | 0.709 | 0.211 | -1.378 | 0.168 | 0.396 | 1.271 |
| HOOK2    | -0.175 | 0.296 | -0.592 | 0.554 | 0.839 | 0.248 | -0.648 | 0.517 | 0.47  | 1.499 |
| HOOK1    | 0.502  | 0.3   | 1.672  | 0.095 | 1.652 | 0.496 | 1.315  | 0.189 | 0.917 | 2.975 |
| HOMER3   | -0.191 | 0.298 | -0.642 | 0.521 | 0.826 | 0.246 | -0.707 | 0.479 | 0.46  | 1.482 |
| HOMER2   | -0.09  | 0.296 | -0.303 | 0.762 | 0.914 | 0.271 | -0.317 | 0.752 | 0.511 | 1.634 |
| HOMER1   | -0.08  | 0.295 | -0.269 | 0.788 | 0.924 | 0.273 | -0.28  | 0.779 | 0.518 | 1.647 |
| HNRNPUL2 | -0.007 | 0.3   | -0.022 | 0.982 | 0.993 | 0.298 | -0.022 | 0.982 | 0.551 | 1.79  |
| HNRNPUL1 | 0.305  | 0.298 | 1.026  | 0.305 | 1.357 | 0.404 | 0.884  | 0.377 | 0.757 | 2.433 |
| HNRNPU   | 0.35   | 0.299 | 1.173  | 0.241 | 1.419 | 0.424 | 0.99   | 0.322 | 0.791 | 2.548 |
| HNRNPR   | -0.027 | 0.296 | -0.091 | 0.927 | 0.973 | 0.289 | -0.092 | 0.926 | 0.544 | 1.74  |
| HNRNPM   | -0.009 | 0.295 | -0.029 | 0.977 | 0.991 | 0.293 | -0.029 | 0.977 | 0.556 | 1.768 |
| HNRNPL   | 0.652  | 0.31  | 2.104  | 0.035 | 1.92  | 0.595 | 1.545  | 0.122 | 1.046 | 3.525 |
| HNRNPK   | -0.132 | 0.295 | -0.448 | 0.654 | 0.876 | 0.259 | -0.48  | 0.632 | 0.491 | 1.563 |
| HNRNPH3  | 0.411  | 0.3   | 1.372  | 0.17  | 1.508 | 0.452 | 1.125  | 0.261 | 0.838 | 2.714 |
| HNRNPH1  | 0.394  | 0.3   | 1.314  | 0.189 | 1.483 | 0.445 | 1.086  | 0.277 | 0.824 | 2.669 |
| HNRNPF   | -0.367 | 0.303 | -1.212 | 0.226 | 0.693 | 0.21  | -1.464 | 0.143 | 0.382 | 1.255 |

|           |        |       |        |       |       |       |        |       |       |       |
|-----------|--------|-------|--------|-------|-------|-------|--------|-------|-------|-------|
| HNRNPD    | 0.571  | 0.306 | 1.869  | 0.062 | 1.771 | 0.541 | 1.424  | 0.155 | 0.973 | 3.224 |
| HNRNPD    | 0.226  | 0.298 | 0.757  | 0.449 | 1.253 | 0.374 | 0.678  | 0.498 | 0.699 | 2.249 |
| HNRNPC    | 0.275  | 0.297 | 0.927  | 0.354 | 1.317 | 0.391 | 0.811  | 0.418 | 0.736 | 2.357 |
| HNRNPAB   | 0.385  | 0.298 | 1.295  | 0.195 | 1.47  | 0.437 | 1.075  | 0.283 | 0.82  | 2.634 |
| HNRNPA3P1 | 0.027  | 0.295 | 0.091  | 0.927 | 1.027 | 0.303 | 0.09   | 0.928 | 0.576 | 1.832 |
| HNRNPA3   | -0.324 | 0.298 | -1.088 | 0.277 | 0.723 | 0.215 | -1.284 | 0.199 | 0.404 | 1.297 |
| HNRNPA2B1 | 0.747  | 0.315 | 2.37   | 0.018 | 2.11  | 0.665 | 1.67   | 0.095 | 1.138 | 3.912 |
| HNRNPA1   | 0.251  | 0.298 | 0.843  | 0.399 | 1.285 | 0.383 | 0.746  | 0.456 | 0.717 | 2.303 |
| HNRNPA0   | -0.203 | 0.298 | -0.681 | 0.496 | 0.816 | 0.243 | -0.755 | 0.45  | 0.455 | 1.464 |
| HNMT      | -0.712 | 0.31  | -2.298 | 0.022 | 0.491 | 0.152 | -3.351 | 0.001 | 0.267 | 0.9   |
| HNF4G     | -0.344 | 0.298 | -1.155 | 0.248 | 0.709 | 0.211 | -1.379 | 0.168 | 0.395 | 1.271 |
| HNF4A     | 0.095  | 0.295 | 0.322  | 0.747 | 1.1   | 0.325 | 0.307  | 0.759 | 0.617 | 1.962 |
| HNF1B     | 0.2    | 0.298 | 0.67   | 0.503 | 1.221 | 0.364 | 0.607  | 0.544 | 0.681 | 2.189 |
| HNF1A     | 0.283  | 0.298 | 0.95   | 0.342 | 1.327 | 0.396 | 0.827  | 0.408 | 0.74  | 2.38  |
| HMX1      | 0.028  | 0.295 | 0.096  | 0.923 | 1.029 | 0.304 | 0.095  | 0.925 | 0.577 | 1.835 |
| HMOX2     | -0.409 | 0.303 | -1.351 | 0.177 | 0.664 | 0.201 | -1.67  | 0.095 | 0.367 | 1.202 |
| HMOX1     | 0.329  | 0.298 | 1.103  | 0.27  | 1.389 | 0.414 | 0.94   | 0.347 | 0.775 | 2.491 |
| HMMR      | 0.353  | 0.3   | 1.177  | 0.239 | 1.423 | 0.427 | 0.991  | 0.321 | 0.791 | 2.561 |
| HMHB1     | 0.479  | 0.302 | 1.585  | 0.113 | 1.614 | 0.488 | 1.259  | 0.208 | 0.893 | 2.918 |
| HMGXB4    | -0.141 | 0.296 | -0.476 | 0.634 | 0.869 | 0.257 | -0.511 | 0.609 | 0.486 | 1.552 |
| HMGXB3    | 0.404  | 0.3   | 1.346  | 0.178 | 1.497 | 0.449 | 1.108  | 0.268 | 0.832 | 2.694 |
| HMGXN5    | 0.53   | 0.302 | 1.752  | 0.08  | 1.699 | 0.514 | 1.36   | 0.174 | 0.939 | 3.073 |
| HMGXN4    | 0.074  | 0.295 | 0.249  | 0.803 | 1.076 | 0.318 | 0.24   | 0.81  | 0.603 | 1.92  |
| HMGXN3    | 0.288  | 0.3   | 0.961  | 0.336 | 1.334 | 0.401 | 0.835  | 0.404 | 0.741 | 2.403 |
| HMGXN2    | 0.42   | 0.3   | 1.403  | 0.161 | 1.523 | 0.456 | 1.145  | 0.252 | 0.846 | 2.739 |
| HMGXN1    | 0.995  | 0.318 | 3.133  | 0.002 | 2.706 | 0.86  | 1.984  | 0.047 | 1.452 | 5.044 |
| HMGCS2    | -0.297 | 0.298 | -0.996 | 0.319 | 0.743 | 0.221 | -1.159 | 0.246 | 0.415 | 1.333 |
| HMGCS1    | 1.044  | 0.321 | 3.251  | 0.001 | 2.841 | 0.913 | 2.017  | 0.044 | 1.514 | 5.332 |
| HMGCR     | -0.01  | 0.295 | -0.035 | 0.972 | 0.99  | 0.292 | -0.036 | 0.972 | 0.555 | 1.765 |
| HMGCL     | -0.042 | 0.298 | -0.142 | 0.887 | 0.959 | 0.286 | -0.145 | 0.885 | 0.535 | 1.719 |
| HMG3P1    | 0.551  | 0.302 | 1.821  | 0.069 | 1.735 | 0.525 | 1.4    | 0.161 | 0.959 | 3.138 |
| HMG3      | 0.682  | 0.306 | 2.231  | 0.026 | 1.978 | 0.605 | 1.617  | 0.106 | 1.086 | 3.602 |
| HMG2      | 0.547  | 0.302 | 1.809  | 0.07  | 1.728 | 0.522 | 1.394  | 0.163 | 0.956 | 3.125 |
| HMG1      | 0.243  | 0.298 | 0.815  | 0.415 | 1.275 | 0.38  | 0.724  | 0.469 | 0.711 | 2.287 |
| HMG2A     | 0.006  | 0.295 | 0.02   | 0.984 | 1.006 | 0.297 | 0.02   | 0.984 | 0.564 | 1.794 |
| HMG1A     | 0.397  | 0.3   | 1.325  | 0.185 | 1.488 | 0.446 | 1.093  | 0.274 | 0.826 | 2.678 |
| HMG20B    | -0.571 | 0.302 | -1.889 | 0.059 | 0.565 | 0.171 | -2.547 | 0.011 | 0.312 | 1.022 |
| HMG20A    | -0.177 | 0.297 | -0.596 | 0.551 | 0.838 | 0.248 | -0.652 | 0.514 | 0.469 | 1.498 |

|           |        |       |        |       |       |       |        |       |       |       |
|-----------|--------|-------|--------|-------|-------|-------|--------|-------|-------|-------|
| HMCES     | 0.875  | 0.315 | 2.777  | 0.005 | 2.398 | 0.755 | 1.851  | 0.064 | 1.294 | 4.446 |
| HMBS      | 0.246  | 0.296 | 0.831  | 0.406 | 1.279 | 0.379 | 0.737  | 0.461 | 0.716 | 2.286 |
| HMBOX1    | 0.189  | 0.298 | 0.636  | 0.525 | 1.208 | 0.36  | 0.579  | 0.562 | 0.674 | 2.166 |
| HLX       | 0.074  | 0.295 | 0.252  | 0.801 | 1.077 | 0.318 | 0.243  | 0.808 | 0.604 | 1.922 |
| HLTF      | 0.977  | 0.321 | 3.047  | 0.002 | 2.656 | 0.851 | 1.945  | 0.052 | 1.417 | 4.978 |
| HLF       | -0.461 | 0.3   | -1.539 | 0.124 | 0.631 | 0.189 | -1.956 | 0.051 | 0.35  | 1.134 |
| HLCS      | -0.455 | 0.306 | -1.487 | 0.137 | 0.635 | 0.194 | -1.882 | 0.06  | 0.348 | 1.156 |
| HLA-J     | -0.435 | 0.3   | -1.45  | 0.147 | 0.647 | 0.194 | -1.817 | 0.069 | 0.359 | 1.165 |
| HLA-G     | -0.017 | 0.295 | -0.059 | 0.953 | 0.983 | 0.29  | -0.059 | 0.953 | 0.551 | 1.753 |
| HLA-F-AS1 | -0.043 | 0.295 | -0.147 | 0.883 | 0.958 | 0.283 | -0.15  | 0.881 | 0.537 | 1.708 |
| HLA-F     | -0.02  | 0.295 | -0.069 | 0.945 | 0.98  | 0.29  | -0.07  | 0.944 | 0.549 | 1.748 |
| HLA-E     | -0.234 | 0.296 | -0.79  | 0.429 | 0.791 | 0.235 | -0.89  | 0.373 | 0.443 | 1.415 |
| HLA-DRB6  | 0.419  | 0.3   | 1.398  | 0.162 | 1.52  | 0.456 | 1.142  | 0.253 | 0.845 | 2.736 |
| HLA-DRB4  | -0.233 | 0.297 | -0.784 | 0.433 | 0.793 | 0.235 | -0.882 | 0.378 | 0.443 | 1.418 |
| HLA-DRA   | -0.402 | 0.3   | -1.338 | 0.181 | 0.669 | 0.201 | -1.647 | 0.1   | 0.371 | 1.205 |
| HLA-DQB2  | -0.577 | 0.303 | -1.904 | 0.057 | 0.562 | 0.17  | -2.576 | 0.01  | 0.31  | 1.017 |
| HLA-DQB1  | -0.809 | 0.31  | -2.606 | 0.009 | 0.445 | 0.138 | -4.012 | 0     | 0.242 | 0.818 |
| HLA-DQA1  | -0.39  | 0.298 | -1.308 | 0.191 | 0.677 | 0.202 | -1.6   | 0.11  | 0.378 | 1.214 |
| HLA-DPB1  | -0.258 | 0.296 | -0.872 | 0.383 | 0.772 | 0.229 | -0.995 | 0.32  | 0.432 | 1.38  |
| HLA-DPA1  | -0.985 | 0.321 | -3.07  | 0.002 | 0.374 | 0.12  | -5.228 | 0     | 0.199 | 0.701 |
| HLA-DOB   | -0.507 | 0.302 | -1.675 | 0.094 | 0.603 | 0.182 | -2.181 | 0.029 | 0.333 | 1.09  |
| HLA-DOA   | -0.352 | 0.298 | -1.181 | 0.238 | 0.703 | 0.21  | -1.415 | 0.157 | 0.392 | 1.261 |
| HLA-DMB   | -0.328 | 0.3   | -1.094 | 0.274 | 0.72  | 0.216 | -1.295 | 0.195 | 0.4   | 1.297 |
| HLA-DMA   | -0.627 | 0.306 | -2.05  | 0.04  | 0.534 | 0.163 | -2.851 | 0.004 | 0.293 | 0.973 |
| HLA-C     | -0.208 | 0.297 | -0.702 | 0.482 | 0.812 | 0.241 | -0.781 | 0.435 | 0.454 | 1.452 |
| HLA-B     | -0.026 | 0.296 | -0.086 | 0.931 | 0.975 | 0.289 | -0.087 | 0.93  | 0.546 | 1.742 |
| HLA-A     | -0.021 | 0.295 | -0.071 | 0.943 | 0.979 | 0.289 | -0.072 | 0.943 | 0.549 | 1.747 |
| HKDC1     | -1.019 | 0.328 | -3.105 | 0.002 | 0.361 | 0.118 | -5.397 | 0     | 0.19  | 0.687 |
| HK3       | 0.3    | 0.3   | 0.999  | 0.318 | 1.35  | 0.405 | 0.863  | 0.388 | 0.749 | 2.432 |
| HK2       | 0.244  | 0.297 | 0.821  | 0.412 | 1.276 | 0.379 | 0.728  | 0.466 | 0.713 | 2.284 |
| HK1       | -0.459 | 0.3   | -1.527 | 0.127 | 0.632 | 0.19  | -1.938 | 0.053 | 0.351 | 1.139 |
| HJURP     | 0.636  | 0.306 | 2.081  | 0.037 | 1.889 | 0.577 | 1.54   | 0.124 | 1.038 | 3.438 |
| HIVEP3    | 0.046  | 0.296 | 0.156  | 0.876 | 1.047 | 0.31  | 0.153  | 0.879 | 0.586 | 1.872 |
| HIVEP2    | -0.459 | 0.3   | -1.531 | 0.126 | 0.632 | 0.189 | -1.944 | 0.052 | 0.351 | 1.137 |
| HIVEP1    | 0.196  | 0.298 | 0.656  | 0.512 | 1.216 | 0.362 | 0.596  | 0.551 | 0.678 | 2.18  |
| HIRIP3    | -0.077 | 0.295 | -0.262 | 0.794 | 0.926 | 0.273 | -0.272 | 0.786 | 0.519 | 1.651 |
| HIRA      | 0.385  | 0.298 | 1.291  | 0.197 | 1.469 | 0.438 | 1.072  | 0.284 | 0.819 | 2.636 |
| HIPK3     | -0.85  | 0.315 | -2.697 | 0.007 | 0.427 | 0.135 | -4.252 | 0     | 0.23  | 0.793 |

|          |        |       |        |       |       |       |        |       |       |       |
|----------|--------|-------|--------|-------|-------|-------|--------|-------|-------|-------|
| HIPK2    | -0.094 | 0.296 | -0.319 | 0.75  | 0.91  | 0.269 | -0.335 | 0.738 | 0.509 | 1.626 |
| HIPK1    | 0.081  | 0.296 | 0.272  | 0.785 | 1.084 | 0.321 | 0.262  | 0.794 | 0.607 | 1.937 |
| HIP1R    | 0.064  | 0.296 | 0.217  | 0.828 | 1.066 | 0.315 | 0.211  | 0.833 | 0.597 | 1.904 |
| HIP1     | -0.095 | 0.297 | -0.321 | 0.748 | 0.909 | 0.27  | -0.337 | 0.736 | 0.508 | 1.627 |
| HINT1    | 0.154  | 0.297 | 0.519  | 0.604 | 1.166 | 0.346 | 0.481  | 0.631 | 0.652 | 2.086 |
| HINFP    | 0.103  | 0.295 | 0.349  | 0.727 | 1.109 | 0.327 | 0.332  | 0.74  | 0.622 | 1.978 |
| HILPDA   | 0.535  | 0.302 | 1.772  | 0.076 | 1.708 | 0.516 | 1.372  | 0.17  | 0.945 | 3.088 |
| HIKESHI  | 0.142  | 0.295 | 0.479  | 0.632 | 1.152 | 0.34  | 0.447  | 0.655 | 0.646 | 2.056 |
| HIGD2A   | 0.232  | 0.297 | 0.782  | 0.434 | 1.261 | 0.374 | 0.698  | 0.485 | 0.705 | 2.256 |
| HIGD1B   | 0      | 0.296 | 0.002  | 0.999 | 1     | 0.297 | 0.002  | 0.999 | 0.56  | 1.789 |
| HIGD1A   | -0.115 | 0.297 | -0.388 | 0.698 | 0.891 | 0.264 | -0.411 | 0.681 | 0.498 | 1.594 |
| HIF3A    | 0.28   | 0.297 | 0.944  | 0.345 | 1.323 | 0.393 | 0.823  | 0.411 | 0.74  | 2.367 |
| HIF1AN   | 0.81   | 0.31  | 2.611  | 0.009 | 2.247 | 0.697 | 1.79   | 0.074 | 1.224 | 4.126 |
| HIF1A    | 0.018  | 0.295 | 0.063  | 0.95  | 1.019 | 0.301 | 0.062  | 0.951 | 0.571 | 1.817 |
| HIC2     | 0.446  | 0.3   | 1.483  | 0.138 | 1.561 | 0.469 | 1.197  | 0.231 | 0.866 | 2.813 |
| HIC1     | 0.244  | 0.296 | 0.824  | 0.41  | 1.277 | 0.378 | 0.731  | 0.465 | 0.714 | 2.282 |
| HIBCH    | 0.053  | 0.295 | 0.179  | 0.858 | 1.054 | 0.312 | 0.175  | 0.861 | 0.591 | 1.881 |
| HHLA3    | -0.074 | 0.297 | -0.248 | 0.804 | 0.929 | 0.276 | -0.257 | 0.797 | 0.519 | 1.663 |
| HHLA2    | -0.114 | 0.295 | -0.385 | 0.701 | 0.893 | 0.264 | -0.407 | 0.684 | 0.5   | 1.592 |
| HHLA1    | -0.209 | 0.297 | -0.705 | 0.481 | 0.811 | 0.241 | -0.784 | 0.433 | 0.454 | 1.451 |
| HHIPL2   | 0.236  | 0.296 | 0.797  | 0.426 | 1.266 | 0.375 | 0.71   | 0.478 | 0.709 | 2.262 |
| HHEX     | -0.007 | 0.295 | -0.025 | 0.98  | 0.993 | 0.293 | -0.025 | 0.98  | 0.557 | 1.77  |
| HHAT     | -0.267 | 0.301 | -0.888 | 0.375 | 0.766 | 0.23  | -1.017 | 0.309 | 0.425 | 1.381 |
| HGSNAT   | -0.694 | 0.31  | -2.239 | 0.025 | 0.499 | 0.155 | -3.232 | 0.001 | 0.272 | 0.917 |
| HGS      | -0.029 | 0.295 | -0.097 | 0.923 | 0.972 | 0.287 | -0.098 | 0.922 | 0.545 | 1.733 |
| HGH1     | 0.671  | 0.31  | 2.168  | 0.03  | 1.957 | 0.606 | 1.579  | 0.114 | 1.067 | 3.591 |
| HGFAC    | -0.205 | 0.297 | -0.691 | 0.49  | 0.815 | 0.242 | -0.767 | 0.443 | 0.456 | 1.457 |
| HGF      | -0.254 | 0.298 | -0.854 | 0.393 | 0.776 | 0.231 | -0.972 | 0.331 | 0.433 | 1.39  |
| HGD      | -0.405 | 0.299 | -1.353 | 0.176 | 0.667 | 0.2   | -1.667 | 0.095 | 0.371 | 1.199 |
| HGC6.3   | 0.606  | 0.306 | 1.984  | 0.047 | 1.834 | 0.561 | 1.487  | 0.137 | 1.007 | 3.338 |
| HFE      | -0.216 | 0.297 | -0.728 | 0.467 | 0.806 | 0.239 | -0.813 | 0.416 | 0.451 | 1.441 |
| HEYL     | 0.429  | 0.3   | 1.429  | 0.153 | 1.535 | 0.461 | 1.163  | 0.245 | 0.853 | 2.764 |
| HEY2     | 0.103  | 0.295 | 0.35   | 0.726 | 1.109 | 0.328 | 0.332  | 0.74  | 0.622 | 1.978 |
| HEY1     | 0.186  | 0.296 | 0.627  | 0.531 | 1.204 | 0.356 | 0.572  | 0.567 | 0.674 | 2.151 |
| HEXIM1   | -0.2   | 0.296 | -0.675 | 0.5   | 0.819 | 0.243 | -0.747 | 0.455 | 0.458 | 1.463 |
| HEXB     | -0.55  | 0.306 | -1.8   | 0.072 | 0.577 | 0.176 | -2.4   | 0.016 | 0.317 | 1.05  |
| HEXA-AS1 | -0.082 | 0.295 | -0.279 | 0.78  | 0.921 | 0.272 | -0.291 | 0.771 | 0.516 | 1.643 |
| HEXA     | -0.065 | 0.296 | -0.219 | 0.826 | 0.937 | 0.277 | -0.227 | 0.821 | 0.525 | 1.673 |

|         |        |       |        |       |       |       |        |       |       |       |
|---------|--------|-------|--------|-------|-------|-------|--------|-------|-------|-------|
| HESX1   | 0.088  | 0.296 | 0.295  | 0.768 | 1.091 | 0.323 | 0.283  | 0.777 | 0.611 | 1.951 |
| HES2    | 0.162  | 0.296 | 0.546  | 0.585 | 1.176 | 0.348 | 0.504  | 0.614 | 0.658 | 2.102 |
| HES1    | 0.145  | 0.296 | 0.488  | 0.625 | 1.156 | 0.342 | 0.455  | 0.649 | 0.647 | 2.064 |
| HERPUD1 | -0.231 | 0.296 | -0.78  | 0.435 | 0.794 | 0.235 | -0.877 | 0.38  | 0.444 | 1.418 |
| HERC6   | 0.252  | 0.298 | 0.847  | 0.397 | 1.287 | 0.383 | 0.748  | 0.454 | 0.718 | 2.307 |
| HERC5   | 0.598  | 0.306 | 1.956  | 0.05  | 1.818 | 0.556 | 1.472  | 0.141 | 0.999 | 3.311 |
| HERC4   | 0.086  | 0.295 | 0.291  | 0.771 | 1.09  | 0.322 | 0.278  | 0.781 | 0.611 | 1.944 |
| HERC2P3 | -0.357 | 0.3   | -1.191 | 0.234 | 0.7   | 0.21  | -1.431 | 0.152 | 0.389 | 1.259 |
| HERC2   | 0.094  | 0.296 | 0.318  | 0.751 | 1.098 | 0.325 | 0.303  | 0.762 | 0.615 | 1.961 |
| HERC1   | -0.32  | 0.3   | -1.065 | 0.287 | 0.726 | 0.218 | -1.255 | 0.21  | 0.403 | 1.308 |
| HEPH    | 0.035  | 0.296 | 0.117  | 0.907 | 1.035 | 0.307 | 0.115  | 0.908 | 0.579 | 1.85  |
| HEMK1   | -0.192 | 0.296 | -0.648 | 0.517 | 0.825 | 0.244 | -0.714 | 0.475 | 0.462 | 1.475 |
| HELZ    | -0.359 | 0.297 | -1.207 | 0.227 | 0.698 | 0.208 | -1.453 | 0.146 | 0.39  | 1.251 |
| HELLS   | 1.033  | 0.321 | 3.216  | 0.001 | 2.809 | 0.902 | 2.005  | 0.045 | 1.497 | 5.27  |
| HEG1    | -0.783 | 0.307 | -2.555 | 0.011 | 0.457 | 0.14  | -3.877 | 0     | 0.251 | 0.833 |
| HECW1   | 0.02   | 0.296 | 0.067  | 0.946 | 1.02  | 0.302 | 0.067  | 0.947 | 0.571 | 1.823 |
| HECTD4  | -0.271 | 0.297 | -0.913 | 0.361 | 0.763 | 0.226 | -1.049 | 0.294 | 0.426 | 1.364 |
| HECTD3  | -0.438 | 0.3   | -1.46  | 0.144 | 0.646 | 0.194 | -1.832 | 0.067 | 0.359 | 1.162 |
| HECA    | -0.351 | 0.299 | -1.174 | 0.241 | 0.704 | 0.211 | -1.406 | 0.16  | 0.392 | 1.265 |
| HEBP2   | 0.182  | 0.296 | 0.613  | 0.54  | 1.199 | 0.355 | 0.561  | 0.575 | 0.671 | 2.144 |
| HEBP1   | -0.832 | 0.321 | -2.593 | 0.01  | 0.435 | 0.14  | -4.046 | 0     | 0.232 | 0.816 |
| HEATR6  | 0.196  | 0.296 | 0.661  | 0.509 | 1.216 | 0.36  | 0.6    | 0.548 | 0.681 | 2.173 |
| HEATR3  | 0.131  | 0.296 | 0.442  | 0.659 | 1.14  | 0.338 | 0.414  | 0.679 | 0.638 | 2.037 |
| HEATR1  | 0.596  | 0.31  | 1.92   | 0.055 | 1.815 | 0.563 | 1.446  | 0.148 | 0.988 | 3.334 |
| HDLBP   | -0.573 | 0.303 | -1.892 | 0.059 | 0.564 | 0.171 | -2.554 | 0.011 | 0.312 | 1.021 |
| HDHD5   | 0.547  | 0.302 | 1.809  | 0.07  | 1.728 | 0.523 | 1.393  | 0.164 | 0.955 | 3.126 |
| HDHD3   | -0.23  | 0.298 | -0.773 | 0.44  | 0.795 | 0.237 | -0.869 | 0.385 | 0.443 | 1.424 |
| HDGFL3  | -0.663 | 0.316 | -2.096 | 0.036 | 0.516 | 0.163 | -2.973 | 0.003 | 0.277 | 0.958 |
| HDGF    | 0.187  | 0.296 | 0.632  | 0.528 | 1.206 | 0.357 | 0.576  | 0.565 | 0.675 | 2.155 |
| HDDC2   | 0.297  | 0.3   | 0.989  | 0.322 | 1.345 | 0.403 | 0.856  | 0.392 | 0.748 | 2.421 |
| HDC     | -0.091 | 0.295 | -0.307 | 0.759 | 0.913 | 0.27  | -0.321 | 0.748 | 0.512 | 1.63  |
| HDAC9   | 0.267  | 0.297 | 0.9    | 0.368 | 1.306 | 0.388 | 0.79   | 0.429 | 0.73  | 2.337 |
| HDAC7   | -0.564 | 0.302 | -1.865 | 0.062 | 0.569 | 0.172 | -2.505 | 0.012 | 0.315 | 1.029 |
| HDAC6   | 0.085  | 0.297 | 0.285  | 0.776 | 1.088 | 0.323 | 0.273  | 0.785 | 0.608 | 1.947 |
| HDAC5   | -0.353 | 0.298 | -1.186 | 0.236 | 0.702 | 0.209 | -1.423 | 0.155 | 0.392 | 1.259 |
| HDAC4   | -0.013 | 0.296 | -0.044 | 0.965 | 0.987 | 0.293 | -0.044 | 0.965 | 0.552 | 1.765 |
| HDAC3   | -0.279 | 0.297 | -0.938 | 0.348 | 0.756 | 0.225 | -1.083 | 0.279 | 0.422 | 1.355 |
| HDAC2   | 0.448  | 0.302 | 1.482  | 0.138 | 1.565 | 0.473 | 1.194  | 0.232 | 0.865 | 2.832 |

|         |        |       |        |       |       |       |        |       |       |       |
|---------|--------|-------|--------|-------|-------|-------|--------|-------|-------|-------|
| HDAC11  | -0.109 | 0.3   | -0.361 | 0.718 | 0.897 | 0.269 | -0.382 | 0.703 | 0.498 | 1.616 |
| HDAC1   | -0.101 | 0.297 | -0.339 | 0.734 | 0.904 | 0.268 | -0.357 | 0.721 | 0.505 | 1.618 |
| HCRT2   | -0.071 | 0.297 | -0.24  | 0.81  | 0.931 | 0.276 | -0.249 | 0.803 | 0.521 | 1.665 |
| HCRT1   | 0.114  | 0.297 | 0.385  | 0.7   | 1.121 | 0.333 | 0.364  | 0.716 | 0.626 | 2.008 |
| HCRT    | -0.07  | 0.296 | -0.238 | 0.812 | 0.932 | 0.275 | -0.247 | 0.805 | 0.522 | 1.663 |
| HCP5    | -0.067 | 0.296 | -0.227 | 0.82  | 0.935 | 0.277 | -0.235 | 0.814 | 0.523 | 1.67  |
| HCN4    | 0.033  | 0.296 | 0.111  | 0.911 | 1.033 | 0.305 | 0.109  | 0.913 | 0.579 | 1.845 |
| HCN2    | 0.253  | 0.296 | 0.854  | 0.393 | 1.288 | 0.382 | 0.755  | 0.45  | 0.721 | 2.303 |
| HCLS1   | -0.531 | 0.303 | -1.754 | 0.079 | 0.588 | 0.178 | -2.314 | 0.021 | 0.325 | 1.065 |
| HCK     | -0.234 | 0.296 | -0.791 | 0.429 | 0.791 | 0.234 | -0.892 | 0.373 | 0.443 | 1.414 |
| HCG9    | -0.26  | 0.298 | -0.874 | 0.382 | 0.771 | 0.229 | -0.998 | 0.318 | 0.43  | 1.381 |
| HCG4B   | 0.181  | 0.297 | 0.611  | 0.541 | 1.199 | 0.356 | 0.558  | 0.577 | 0.67  | 2.146 |
| HCG4    | 0.143  | 0.295 | 0.483  | 0.629 | 1.153 | 0.341 | 0.45   | 0.653 | 0.646 | 2.058 |
| HCG26   | 0.206  | 0.296 | 0.697  | 0.486 | 1.229 | 0.364 | 0.629  | 0.529 | 0.688 | 2.198 |
| HCG18   | 0.039  | 0.296 | 0.132  | 0.895 | 1.04  | 0.307 | 0.129  | 0.897 | 0.583 | 1.855 |
| HCFC2   | 0.416  | 0.299 | 1.393  | 0.164 | 1.516 | 0.453 | 1.14   | 0.254 | 0.844 | 2.721 |
| HCFC1R1 | -0.395 | 0.3   | -1.318 | 0.187 | 0.673 | 0.202 | -1.617 | 0.106 | 0.374 | 1.212 |
| HCFC1   | 0.138  | 0.3   | 0.461  | 0.645 | 1.149 | 0.345 | 0.43   | 0.667 | 0.637 | 2.07  |
| HCCS    | 0.818  | 0.31  | 2.642  | 0.008 | 2.267 | 0.702 | 1.804  | 0.071 | 1.235 | 4.16  |
| HCAR3   | -0.679 | 0.306 | -2.216 | 0.027 | 0.507 | 0.155 | -3.171 | 0.002 | 0.278 | 0.925 |
| HBZ     | 0.177  | 0.296 | 0.597  | 0.55  | 1.193 | 0.353 | 0.547  | 0.584 | 0.668 | 2.132 |
| HBS1L   | 0.113  | 0.296 | 0.382  | 0.702 | 1.12  | 0.331 | 0.362  | 0.718 | 0.627 | 1.999 |
| HBQ1    | 0.301  | 0.298 | 1.012  | 0.312 | 1.351 | 0.402 | 0.874  | 0.382 | 0.754 | 2.422 |
| HBP1    | -0.472 | 0.302 | -1.561 | 0.119 | 0.624 | 0.189 | -1.994 | 0.046 | 0.345 | 1.128 |
| HBEGF   | -0.02  | 0.296 | -0.067 | 0.946 | 0.98  | 0.29  | -0.068 | 0.946 | 0.549 | 1.751 |
| HBE1    | 0.084  | 0.297 | 0.283  | 0.778 | 1.087 | 0.323 | 0.271  | 0.786 | 0.608 | 1.946 |
| HBD     | 0.251  | 0.297 | 0.846  | 0.398 | 1.286 | 0.382 | 0.748  | 0.455 | 0.718 | 2.302 |
| HBBP1   | -0.521 | 0.303 | -1.722 | 0.085 | 0.594 | 0.18  | -2.261 | 0.024 | 0.328 | 1.075 |
| HBB     | 0.071  | 0.295 | 0.241  | 0.809 | 1.074 | 0.317 | 0.233  | 0.816 | 0.602 | 1.914 |
| HAX1    | -0.358 | 0.298 | -1.201 | 0.23  | 0.699 | 0.208 | -1.444 | 0.149 | 0.39  | 1.254 |
| HAVCR1  | 0.019  | 0.295 | 0.065  | 0.948 | 1.019 | 0.301 | 0.065  | 0.949 | 0.572 | 1.818 |
| HAUS7   | 0.445  | 0.3   | 1.486  | 0.137 | 1.561 | 0.467 | 1.199  | 0.231 | 0.868 | 2.807 |
| HAUS6   | 0.254  | 0.297 | 0.854  | 0.393 | 1.289 | 0.384 | 0.755  | 0.451 | 0.72  | 2.31  |
| HAUS5   | 0.203  | 0.299 | 0.679  | 0.497 | 1.225 | 0.367 | 0.615  | 0.539 | 0.682 | 2.203 |
| HAUS3   | 0.669  | 0.306 | 2.189  | 0.029 | 1.953 | 0.597 | 1.596  | 0.111 | 1.073 | 3.557 |
| HAUS2   | 0.614  | 0.31  | 1.981  | 0.048 | 1.848 | 0.573 | 1.48   | 0.139 | 1.006 | 3.393 |
| HAT1    | -0.079 | 0.296 | -0.267 | 0.789 | 0.924 | 0.274 | -0.278 | 0.781 | 0.517 | 1.652 |
| HAS2    | -0.947 | 0.321 | -2.952 | 0.003 | 0.388 | 0.124 | -4.92  | 0     | 0.207 | 0.727 |

|           |        |       |        |       |       |       |        |       |       |       |
|-----------|--------|-------|--------|-------|-------|-------|--------|-------|-------|-------|
| HAS1      | -0.406 | 0.3   | -1.353 | 0.176 | 0.666 | 0.2   | -1.668 | 0.095 | 0.37  | 1.2   |
| HARS2     | 0.127  | 0.295 | 0.429  | 0.668 | 1.135 | 0.335 | 0.403  | 0.687 | 0.636 | 2.025 |
| HARS1     | -0.69  | 0.306 | -2.252 | 0.024 | 0.502 | 0.154 | -3.243 | 0.001 | 0.275 | 0.914 |
| HAPLN2    | 0.074  | 0.297 | 0.248  | 0.804 | 1.077 | 0.319 | 0.24   | 0.811 | 0.602 | 1.926 |
| HAPLN1    | 0.186  | 0.3   | 0.62   | 0.535 | 1.204 | 0.361 | 0.566  | 0.571 | 0.669 | 2.168 |
| HAP1      | 0.184  | 0.296 | 0.621  | 0.535 | 1.202 | 0.356 | 0.567  | 0.571 | 0.673 | 2.147 |
| HAO2      | -0.696 | 0.306 | -2.271 | 0.023 | 0.499 | 0.153 | -3.281 | 0.001 | 0.274 | 0.909 |
| HAO1      | -0.251 | 0.297 | -0.844 | 0.399 | 0.778 | 0.231 | -0.96  | 0.337 | 0.435 | 1.393 |
| HAND2-AS1 | 0.15   | 0.296 | 0.508  | 0.611 | 1.162 | 0.344 | 0.472  | 0.637 | 0.651 | 2.077 |
| HAND2     | -0.212 | 0.298 | -0.713 | 0.476 | 0.809 | 0.241 | -0.795 | 0.427 | 0.451 | 1.449 |
| HAND1     | 0.05   | 0.295 | 0.17   | 0.865 | 1.051 | 0.31  | 0.166  | 0.868 | 0.589 | 1.876 |
| HAMP      | 1.155  | 0.324 | 3.566  | 0     | 3.175 | 1.029 | 2.115  | 0.034 | 1.683 | 5.991 |
| HAL       | -0.045 | 0.297 | -0.153 | 0.879 | 0.956 | 0.284 | -0.156 | 0.876 | 0.533 | 1.712 |
| HAGH      | -0.149 | 0.299 | -0.499 | 0.618 | 0.862 | 0.257 | -0.538 | 0.591 | 0.48  | 1.547 |
| HADHB     | -0.25  | 0.3   | -0.834 | 0.404 | 0.779 | 0.234 | -0.948 | 0.343 | 0.432 | 1.402 |
| HADHA     | -0.461 | 0.302 | -1.524 | 0.128 | 0.631 | 0.191 | -1.936 | 0.053 | 0.349 | 1.141 |
| HADH      | 0.515  | 0.303 | 1.702  | 0.089 | 1.673 | 0.506 | 1.33   | 0.184 | 0.925 | 3.028 |
| HACD3     | -0.504 | 0.306 | -1.648 | 0.099 | 0.604 | 0.185 | -2.142 | 0.032 | 0.332 | 1.1   |
| HACD2     | 0.492  | 0.306 | 1.605  | 0.108 | 1.635 | 0.501 | 1.268  | 0.205 | 0.897 | 2.981 |
| HACD1     | 0.223  | 0.296 | 0.754  | 0.451 | 1.25  | 0.37  | 0.676  | 0.499 | 0.7   | 2.234 |
| HABP4     | -0.286 | 0.302 | -0.949 | 0.343 | 0.751 | 0.227 | -1.099 | 0.272 | 0.416 | 1.357 |
| HABP2     | -0.039 | 0.295 | -0.132 | 0.895 | 0.962 | 0.284 | -0.135 | 0.893 | 0.539 | 1.715 |
| HAAO      | -0.212 | 0.296 | -0.715 | 0.475 | 0.809 | 0.24  | -0.796 | 0.426 | 0.453 | 1.446 |
| H6PD      | -1.34  | 0.338 | -3.967 | 0     | 0.262 | 0.088 | -8.347 | 0     | 0.135 | 0.508 |
| H4C9      | 0.9    | 0.315 | 2.854  | 0.004 | 2.46  | 0.776 | 1.882  | 0.06  | 1.326 | 4.563 |
| H4C8      | 0.006  | 0.296 | 0.02   | 0.984 | 1.006 | 0.298 | 0.02   | 0.984 | 0.563 | 1.796 |
| H4C7      | 0.234  | 0.296 | 0.789  | 0.43  | 1.263 | 0.374 | 0.704  | 0.482 | 0.707 | 2.258 |
| H4C5      | 0.05   | 0.295 | 0.17   | 0.865 | 1.051 | 0.31  | 0.166  | 0.868 | 0.59  | 1.875 |
| H4C4      | 0.406  | 0.3   | 1.356  | 0.175 | 1.502 | 0.45  | 1.115  | 0.265 | 0.835 | 2.701 |
| H4C13     | -0.753 | 0.315 | -2.393 | 0.017 | 0.471 | 0.148 | -3.57  | 0     | 0.254 | 0.873 |
| H4C1      | -0.006 | 0.295 | -0.022 | 0.982 | 0.994 | 0.293 | -0.022 | 0.982 | 0.557 | 1.773 |
| H3C8      | 0.502  | 0.302 | 1.662  | 0.097 | 1.653 | 0.5   | 1.306  | 0.192 | 0.914 | 2.99  |
| H3C7      | 1.189  | 0.337 | 3.533  | 0     | 3.284 | 1.105 | 2.066  | 0.039 | 1.698 | 6.352 |
| H3C6      | -0.098 | 0.296 | -0.33  | 0.742 | 0.907 | 0.268 | -0.346 | 0.729 | 0.508 | 1.62  |
| H3C3      | 0.184  | 0.296 | 0.62   | 0.535 | 1.202 | 0.356 | 0.566  | 0.571 | 0.672 | 2.147 |
| H3C2      | 0.675  | 0.304 | 2.222  | 0.026 | 1.964 | 0.597 | 1.615  | 0.106 | 1.083 | 3.564 |
| H3C11     | 0.27   | 0.298 | 0.909  | 0.363 | 1.311 | 0.39  | 0.796  | 0.426 | 0.731 | 2.348 |
| H3C1      | 0.055  | 0.295 | 0.188  | 0.851 | 1.057 | 0.312 | 0.183  | 0.855 | 0.592 | 1.886 |

|        |        |       |        |       |       |       |        |       |       |       |
|--------|--------|-------|--------|-------|-------|-------|--------|-------|-------|-------|
| H3-4   | -0.308 | 0.298 | -1.035 | 0.301 | 0.735 | 0.219 | -1.212 | 0.225 | 0.41  | 1.317 |
| H3-3A  | 0.912  | 0.316 | 2.889  | 0.004 | 2.49  | 0.786 | 1.895  | 0.058 | 1.341 | 4.624 |
| H2BS1  | -0.03  | 0.295 | -0.102 | 0.919 | 0.97  | 0.287 | -0.103 | 0.918 | 0.544 | 1.731 |
| H2BC9  | 0.273  | 0.296 | 0.922  | 0.356 | 1.314 | 0.389 | 0.807  | 0.42  | 0.735 | 2.348 |
| H2BC6  | 0.326  | 0.298 | 1.094  | 0.274 | 1.385 | 0.412 | 0.934  | 0.35  | 0.773 | 2.481 |
| H2BC5  | 0.295  | 0.296 | 0.996  | 0.319 | 1.343 | 0.398 | 0.862  | 0.389 | 0.751 | 2.402 |
| H2BC3  | 0.004  | 0.295 | 0.012  | 0.99  | 1.004 | 0.296 | 0.012  | 0.99  | 0.563 | 1.789 |
| H2BC21 | -0.208 | 0.298 | -0.7   | 0.484 | 0.812 | 0.242 | -0.778 | 0.436 | 0.453 | 1.455 |
| H2BC17 | -0.138 | 0.296 | -0.466 | 0.641 | 0.871 | 0.258 | -0.5   | 0.617 | 0.488 | 1.556 |
| H2BC15 | 0.272  | 0.296 | 0.919  | 0.358 | 1.313 | 0.389 | 0.804  | 0.421 | 0.735 | 2.347 |
| H2BC14 | 0.145  | 0.295 | 0.491  | 0.623 | 1.156 | 0.342 | 0.457  | 0.648 | 0.648 | 2.063 |
| H2BC13 | -0.136 | 0.296 | -0.46  | 0.646 | 0.873 | 0.259 | -0.493 | 0.622 | 0.488 | 1.56  |
| H2BC12 | 0.32   | 0.298 | 1.074  | 0.283 | 1.377 | 0.41  | 0.919  | 0.358 | 0.768 | 2.467 |
| H2BC11 | 0.27   | 0.296 | 0.912  | 0.362 | 1.31  | 0.388 | 0.799  | 0.424 | 0.733 | 2.342 |
| H2AZ2  | 0.743  | 0.315 | 2.358  | 0.018 | 2.102 | 0.662 | 1.664  | 0.096 | 1.133 | 3.896 |
| H2AZ1  | 0.779  | 0.31  | 2.515  | 0.012 | 2.179 | 0.675 | 1.747  | 0.081 | 1.187 | 4     |
| H2AX   | 0.5    | 0.3   | 1.666  | 0.096 | 1.648 | 0.494 | 1.312  | 0.19  | 0.916 | 2.966 |
| H2AW   | 0.02   | 0.295 | 0.067  | 0.947 | 1.02  | 0.301 | 0.066  | 0.947 | 0.572 | 1.818 |
| H2AP   | -0.185 | 0.296 | -0.626 | 0.531 | 0.831 | 0.246 | -0.688 | 0.492 | 0.465 | 1.485 |
| H2AJ   | -0.258 | 0.298 | -0.868 | 0.386 | 0.772 | 0.23  | -0.99  | 0.322 | 0.431 | 1.385 |
| H2AC8  | -0.062 | 0.295 | -0.208 | 0.835 | 0.94  | 0.278 | -0.215 | 0.83  | 0.527 | 1.678 |
| H2AC6  | 0.071  | 0.296 | 0.24   | 0.81  | 1.074 | 0.317 | 0.232  | 0.816 | 0.602 | 1.916 |
| H2AC4  | -0.172 | 0.296 | -0.582 | 0.561 | 0.842 | 0.249 | -0.635 | 0.525 | 0.471 | 1.504 |
| H2AC18 | 0.241  | 0.296 | 0.813  | 0.416 | 1.272 | 0.377 | 0.722  | 0.47  | 0.712 | 2.274 |
| H2AC17 | 0.344  | 0.298 | 1.155  | 0.248 | 1.41  | 0.42  | 0.977  | 0.328 | 0.787 | 2.526 |
| H2AC16 | 0.242  | 0.297 | 0.815  | 0.415 | 1.274 | 0.378 | 0.724  | 0.469 | 0.712 | 2.279 |
| H2AC15 | 0.367  | 0.298 | 1.232  | 0.218 | 1.443 | 0.429 | 1.031  | 0.302 | 0.805 | 2.586 |
| H2AC14 | 0.51   | 0.303 | 1.683  | 0.092 | 1.665 | 0.504 | 1.319  | 0.187 | 0.92  | 3.013 |
| H1-6   | 0.795  | 0.315 | 2.523  | 0.012 | 2.213 | 0.697 | 1.741  | 0.082 | 1.194 | 4.103 |
| H1-5   | 0.735  | 0.307 | 2.398  | 0.016 | 2.086 | 0.639 | 1.698  | 0.089 | 1.144 | 3.803 |
| H1-4   | 0.688  | 0.305 | 2.255  | 0.024 | 1.99  | 0.608 | 1.63   | 0.103 | 1.094 | 3.62  |
| H1-3   | 0.339  | 0.298 | 1.139  | 0.255 | 1.404 | 0.418 | 0.966  | 0.334 | 0.783 | 2.517 |
| H1-2   | 0.547  | 0.3   | 1.821  | 0.069 | 1.728 | 0.519 | 1.403  | 0.161 | 0.959 | 3.113 |
| H1-10  | 0.15   | 0.296 | 0.508  | 0.612 | 1.162 | 0.344 | 0.472  | 0.637 | 0.651 | 2.076 |
| H1-1   | 0.258  | 0.296 | 0.871  | 0.384 | 1.295 | 0.384 | 0.768  | 0.443 | 0.724 | 2.314 |
| H1-0   | -0.448 | 0.3   | -1.494 | 0.135 | 0.639 | 0.192 | -1.885 | 0.059 | 0.355 | 1.15  |
| GZMM   | -0.107 | 0.295 | -0.362 | 0.717 | 0.899 | 0.265 | -0.382 | 0.702 | 0.504 | 1.603 |
| GZMK   | -0.333 | 0.298 | -1.115 | 0.265 | 0.717 | 0.214 | -1.323 | 0.186 | 0.4   | 1.287 |



|         |        |       |        |       |       |       |        |       |       |       |
|---------|--------|-------|--------|-------|-------|-------|--------|-------|-------|-------|
| GZMH    | 0.163  | 0.296 | 0.549  | 0.583 | 1.177 | 0.349 | 0.507  | 0.612 | 0.659 | 2.103 |
| GZMB    | 0.216  | 0.296 | 0.73   | 0.465 | 1.242 | 0.368 | 0.657  | 0.511 | 0.695 | 2.219 |
| GZMA    | -0.302 | 0.297 | -1.016 | 0.309 | 0.74  | 0.22  | -1.186 | 0.235 | 0.413 | 1.323 |
| GYS2    | 0.46   | 0.3   | 1.536  | 0.125 | 1.584 | 0.475 | 1.231  | 0.218 | 0.881 | 2.85  |
| GYS1    | -0.056 | 0.295 | -0.191 | 0.848 | 0.945 | 0.279 | -0.197 | 0.844 | 0.53  | 1.686 |
| GYPE    | 0.364  | 0.298 | 1.221  | 0.222 | 1.439 | 0.429 | 1.024  | 0.306 | 0.802 | 2.58  |
| GYPC    | -0.363 | 0.298 | -1.217 | 0.224 | 0.696 | 0.207 | -1.467 | 0.142 | 0.388 | 1.248 |
| GYPB    | 0.382  | 0.3   | 1.273  | 0.203 | 1.465 | 0.439 | 1.058  | 0.29  | 0.814 | 2.636 |
| GYPA    | -0.033 | 0.297 | -0.111 | 0.911 | 0.967 | 0.287 | -0.113 | 0.91  | 0.541 | 1.732 |
| GYG2    | -0.179 | 0.295 | -0.607 | 0.544 | 0.836 | 0.247 | -0.665 | 0.506 | 0.468 | 1.492 |
| GYG1    | 0.913  | 0.315 | 2.897  | 0.004 | 2.493 | 0.786 | 1.9    | 0.057 | 1.344 | 4.625 |
| GVINP1  | -0.683 | 0.306 | -2.23  | 0.026 | 0.505 | 0.155 | -3.199 | 0.001 | 0.277 | 0.921 |
| GUSBP14 | -0.563 | 0.306 | -1.844 | 0.065 | 0.569 | 0.174 | -2.476 | 0.013 | 0.313 | 1.036 |
| GUSBP11 | -0.521 | 0.303 | -1.724 | 0.085 | 0.594 | 0.18  | -2.262 | 0.024 | 0.328 | 1.074 |
| GUSB    | 0.495  | 0.3   | 1.648  | 0.099 | 1.64  | 0.493 | 1.3    | 0.194 | 0.91  | 2.955 |
| GULP1   | -0.737 | 0.307 | -2.402 | 0.016 | 0.478 | 0.147 | -3.551 | 0     | 0.262 | 0.873 |
| GUK1    | 0.06   | 0.296 | 0.202  | 0.84  | 1.062 | 0.314 | 0.196  | 0.844 | 0.595 | 1.895 |
| GUF1    | -0.502 | 0.306 | -1.64  | 0.101 | 0.605 | 0.185 | -2.13  | 0.033 | 0.332 | 1.103 |
| GUCY2F  | 0.028  | 0.295 | 0.096  | 0.924 | 1.029 | 0.304 | 0.094  | 0.925 | 0.577 | 1.835 |
| GUCY2D  | 0.398  | 0.304 | 1.312  | 0.19  | 1.489 | 0.452 | 1.082  | 0.279 | 0.821 | 2.7   |
| GUCY2C  | 0.173  | 0.296 | 0.585  | 0.559 | 1.189 | 0.352 | 0.537  | 0.591 | 0.666 | 2.125 |
| GUCY1B2 | 0.19   | 0.296 | 0.642  | 0.521 | 1.21  | 0.358 | 0.585  | 0.558 | 0.677 | 2.161 |
| GUCY1B1 | -0.582 | 0.303 | -1.924 | 0.054 | 0.559 | 0.169 | -2.611 | 0.009 | 0.309 | 1.011 |
| GUCY1A2 | 0.204  | 0.296 | 0.69   | 0.49  | 1.227 | 0.363 | 0.624  | 0.533 | 0.687 | 2.191 |
| GUCY1A1 | -0.27  | 0.296 | -0.912 | 0.362 | 0.763 | 0.226 | -1.048 | 0.295 | 0.427 | 1.364 |
| GUCA2B  | 0.55   | 0.303 | 1.814  | 0.07  | 1.733 | 0.525 | 1.395  | 0.163 | 0.957 | 3.139 |
| GUCA1B  | -0.222 | 0.297 | -0.745 | 0.456 | 0.801 | 0.238 | -0.835 | 0.404 | 0.447 | 1.435 |
| GUCA1A  | -0.027 | 0.295 | -0.091 | 0.928 | 0.974 | 0.288 | -0.092 | 0.927 | 0.546 | 1.737 |
| GTSE1   | 0.674  | 0.31  | 2.177  | 0.029 | 1.962 | 0.608 | 1.583  | 0.113 | 1.069 | 3.601 |
| GTPBP8  | 0.583  | 0.302 | 1.926  | 0.054 | 1.791 | 0.542 | 1.46   | 0.144 | 0.99  | 3.24  |
| GTPBP6  | 0.351  | 0.298 | 1.178  | 0.239 | 1.421 | 0.424 | 0.993  | 0.321 | 0.792 | 2.548 |
| GTPBP4  | 1.118  | 0.336 | 3.326  | 0.001 | 3.06  | 1.029 | 2.002  | 0.045 | 1.583 | 5.914 |
| GTPBP3  | 0.896  | 0.321 | 2.794  | 0.005 | 2.45  | 0.786 | 1.845  | 0.065 | 1.307 | 4.593 |
| GTPBP2  | 0.39   | 0.303 | 1.285  | 0.199 | 1.477 | 0.448 | 1.064  | 0.287 | 0.815 | 2.676 |
| GTPBP1  | 0.105  | 0.295 | 0.355  | 0.722 | 1.111 | 0.328 | 0.337  | 0.736 | 0.622 | 1.982 |
| GTF3C5  | 0.086  | 0.296 | 0.29   | 0.772 | 1.09  | 0.323 | 0.278  | 0.781 | 0.61  | 1.948 |
| GTF3C4  | 0.356  | 0.3   | 1.187  | 0.235 | 1.427 | 0.428 | 0.998  | 0.318 | 0.793 | 2.569 |
| GTF3C3  | 0.309  | 0.298 | 1.039  | 0.299 | 1.362 | 0.405 | 0.894  | 0.371 | 0.76  | 2.441 |

|           |        |       |        |       |       |       |        |       |       |       |
|-----------|--------|-------|--------|-------|-------|-------|--------|-------|-------|-------|
| GTF3C2    | 0.03   | 0.296 | 0.103  | 0.918 | 1.031 | 0.305 | 0.101  | 0.919 | 0.578 | 1.84  |
| GTF3C1    | -0.198 | 0.296 | -0.668 | 0.504 | 0.82  | 0.243 | -0.739 | 0.46  | 0.459 | 1.466 |
| GTF3A     | 0.347  | 0.3   | 1.157  | 0.247 | 1.414 | 0.424 | 0.978  | 0.328 | 0.786 | 2.545 |
| GTF2IRD2B | -0.006 | 0.296 | -0.02  | 0.984 | 0.994 | 0.294 | -0.02  | 0.984 | 0.557 | 1.775 |
| GTF2IRD1  | 0.261  | 0.297 | 0.88   | 0.379 | 1.298 | 0.385 | 0.774  | 0.439 | 0.726 | 2.322 |
| GTF2I     | -0.09  | 0.297 | -0.302 | 0.763 | 0.914 | 0.271 | -0.316 | 0.752 | 0.511 | 1.636 |
| GTF2H5    | -0.213 | 0.298 | -0.715 | 0.474 | 0.808 | 0.241 | -0.797 | 0.425 | 0.45  | 1.449 |
| GTF2H4    | 0.98   | 0.321 | 3.052  | 0.002 | 2.665 | 0.856 | 1.945  | 0.052 | 1.42  | 5.002 |
| GTF2H3    | 0.29   | 0.298 | 0.976  | 0.329 | 1.337 | 0.398 | 0.847  | 0.397 | 0.746 | 2.395 |
| GTF2H1    | 0.479  | 0.3   | 1.596  | 0.11  | 1.614 | 0.484 | 1.268  | 0.205 | 0.897 | 2.905 |
| GTF2F2    | 0.161  | 0.298 | 0.54   | 0.589 | 1.174 | 0.35  | 0.499  | 0.618 | 0.655 | 2.105 |
| GTF2F1    | -0.644 | 0.306 | -2.105 | 0.035 | 0.525 | 0.161 | -2.956 | 0.003 | 0.288 | 0.957 |
| GTF2E2    | -0.304 | 0.3   | -1.011 | 0.312 | 0.738 | 0.222 | -1.182 | 0.237 | 0.41  | 1.329 |
| GTF2E1    | 0.541  | 0.302 | 1.789  | 0.074 | 1.717 | 0.519 | 1.382  | 0.167 | 0.95  | 3.106 |
| GTF2B     | -0.209 | 0.301 | -0.694 | 0.488 | 0.811 | 0.244 | -0.772 | 0.44  | 0.45  | 1.464 |
| GTF2A2    | 0.363  | 0.298 | 1.216  | 0.224 | 1.437 | 0.429 | 1.02   | 0.308 | 0.801 | 2.579 |
| GTF2A1    | -0.258 | 0.298 | -0.866 | 0.387 | 0.773 | 0.23  | -0.988 | 0.323 | 0.431 | 1.385 |
| GTDC1     | -0.14  | 0.296 | -0.473 | 0.636 | 0.869 | 0.257 | -0.508 | 0.612 | 0.487 | 1.552 |
| GSTZ1     | 0.019  | 0.297 | 0.063  | 0.95  | 1.019 | 0.303 | 0.062  | 0.95  | 0.569 | 1.825 |
| GSTT4     | 0.172  | 0.296 | 0.583  | 0.56  | 1.188 | 0.352 | 0.535  | 0.593 | 0.665 | 2.123 |
| GSTT2     | 0.191  | 0.296 | 0.646  | 0.518 | 1.211 | 0.359 | 0.588  | 0.557 | 0.678 | 2.163 |
| GSTT1     | 0.172  | 0.296 | 0.583  | 0.56  | 1.188 | 0.352 | 0.536  | 0.592 | 0.665 | 2.122 |
| GSTP1     | 0.24   | 0.3   | 0.8    | 0.424 | 1.272 | 0.382 | 0.711  | 0.477 | 0.706 | 2.291 |
| GSTO1     | 0.502  | 0.3   | 1.675  | 0.094 | 1.652 | 0.495 | 1.317  | 0.188 | 0.918 | 2.972 |
| GSTM5     | -0.165 | 0.296 | -0.555 | 0.579 | 0.848 | 0.251 | -0.604 | 0.546 | 0.475 | 1.516 |
| GSTM4     | -0.087 | 0.295 | -0.296 | 0.767 | 0.916 | 0.271 | -0.309 | 0.757 | 0.514 | 1.635 |
| GSTM3     | 0.179  | 0.296 | 0.603  | 0.547 | 1.196 | 0.354 | 0.552  | 0.581 | 0.669 | 2.137 |
| GSTM2     | -0.045 | 0.295 | -0.151 | 0.88  | 0.956 | 0.282 | -0.154 | 0.877 | 0.536 | 1.706 |
| GSTM1     | 0.016  | 0.295 | 0.053  | 0.958 | 1.016 | 0.3   | 0.052  | 0.958 | 0.569 | 1.812 |
| GSTK1     | -0.758 | 0.315 | -2.407 | 0.016 | 0.468 | 0.148 | -3.602 | 0     | 0.253 | 0.869 |
| GSTCD     | 0.474  | 0.303 | 1.564  | 0.118 | 1.606 | 0.487 | 1.246  | 0.213 | 0.887 | 2.908 |
| GSTA4     | 0.458  | 0.303 | 1.512  | 0.13  | 1.58  | 0.478 | 1.214  | 0.225 | 0.873 | 2.859 |
| GSTA3     | 0.467  | 0.3   | 1.555  | 0.12  | 1.594 | 0.478 | 1.243  | 0.214 | 0.886 | 2.87  |
| GSTA1     | 0.344  | 0.298 | 1.157  | 0.247 | 1.411 | 0.42  | 0.979  | 0.328 | 0.787 | 2.528 |
| GSS       | -0.725 | 0.31  | -2.339 | 0.019 | 0.484 | 0.15  | -3.435 | 0.001 | 0.264 | 0.889 |
| GSR       | -0.186 | 0.296 | -0.628 | 0.53  | 0.83  | 0.246 | -0.69  | 0.49  | 0.465 | 1.484 |
| GSPT2     | -0.136 | 0.297 | -0.46  | 0.646 | 0.872 | 0.259 | -0.492 | 0.622 | 0.488 | 1.561 |
| GSPT1     | 0.395  | 0.3   | 1.317  | 0.188 | 1.484 | 0.445 | 1.088  | 0.277 | 0.825 | 2.67  |

|         |        |       |        |       |       |       |        |       |       |       |
|---------|--------|-------|--------|-------|-------|-------|--------|-------|-------|-------|
| GSN-AS1 | 0.075  | 0.296 | 0.254  | 0.8   | 1.078 | 0.319 | 0.244  | 0.807 | 0.604 | 1.924 |
| GSN     | -0.39  | 0.298 | -1.309 | 0.191 | 0.677 | 0.202 | -1.601 | 0.109 | 0.377 | 1.214 |
| GSK3B   | 1.11   | 0.328 | 3.384  | 0.001 | 3.034 | 0.995 | 2.044  | 0.041 | 1.595 | 5.771 |
| GSK3A   | 0.051  | 0.299 | 0.172  | 0.863 | 1.053 | 0.315 | 0.168  | 0.867 | 0.586 | 1.891 |
| GSG1    | 0.003  | 0.295 | 0.01   | 0.992 | 1.003 | 0.296 | 0.01   | 0.992 | 0.562 | 1.789 |
| GSE1    | -0.186 | 0.298 | -0.622 | 0.534 | 0.831 | 0.248 | -0.683 | 0.494 | 0.463 | 1.49  |
| GSDME   | 0.158  | 0.296 | 0.533  | 0.594 | 1.171 | 0.347 | 0.493  | 0.622 | 0.655 | 2.092 |
| GSDMD   | 0.34   | 0.299 | 1.139  | 0.255 | 1.406 | 0.42  | 0.966  | 0.334 | 0.783 | 2.525 |
| GSDMB   | 0.445  | 0.303 | 1.47   | 0.142 | 1.56  | 0.472 | 1.187  | 0.235 | 0.862 | 2.824 |
| GSC2    | -0.049 | 0.296 | -0.165 | 0.869 | 0.952 | 0.282 | -0.169 | 0.866 | 0.534 | 1.7   |
| GSAP    | -0.468 | 0.306 | -1.525 | 0.127 | 0.627 | 0.192 | -1.945 | 0.052 | 0.344 | 1.142 |
| GRWD1   | -0.354 | 0.3   | -1.183 | 0.237 | 0.702 | 0.21  | -1.42  | 0.156 | 0.39  | 1.262 |
| GRTP1   | -0.084 | 0.296 | -0.283 | 0.777 | 0.92  | 0.272 | -0.296 | 0.768 | 0.515 | 1.641 |
| GRSF1   | 0.319  | 0.297 | 1.076  | 0.282 | 1.376 | 0.408 | 0.921  | 0.357 | 0.769 | 2.46  |
| GRPR    | -0.378 | 0.3   | -1.262 | 0.207 | 0.685 | 0.205 | -1.534 | 0.125 | 0.381 | 1.233 |
| GRPEL1  | -0.249 | 0.297 | -0.838 | 0.402 | 0.78  | 0.231 | -0.952 | 0.341 | 0.436 | 1.395 |
| GRP     | -0.577 | 0.303 | -1.904 | 0.057 | 0.562 | 0.17  | -2.576 | 0.01  | 0.31  | 1.017 |
| GRN     | -0.15  | 0.295 | -0.508 | 0.611 | 0.861 | 0.254 | -0.548 | 0.583 | 0.482 | 1.535 |
| GRM8    | -0.077 | 0.296 | -0.259 | 0.796 | 0.926 | 0.274 | -0.269 | 0.788 | 0.519 | 1.654 |
| GRM7    | 0.153  | 0.296 | 0.518  | 0.604 | 1.166 | 0.345 | 0.48   | 0.631 | 0.652 | 2.083 |
| GRM6    | 0.328  | 0.301 | 1.092  | 0.275 | 1.389 | 0.418 | 0.931  | 0.352 | 0.77  | 2.504 |
| GRM5    | -0.016 | 0.295 | -0.054 | 0.957 | 0.984 | 0.29  | -0.055 | 0.956 | 0.552 | 1.755 |
| GRM4    | 0.458  | 0.302 | 1.515  | 0.13  | 1.581 | 0.478 | 1.216  | 0.224 | 0.874 | 2.858 |
| GRM3    | -0.391 | 0.299 | -1.306 | 0.192 | 0.677 | 0.202 | -1.598 | 0.11  | 0.376 | 1.216 |
| GRM2    | -0.118 | 0.295 | -0.401 | 0.688 | 0.888 | 0.262 | -0.426 | 0.67  | 0.498 | 1.585 |
| GRM1    | 0.187  | 0.298 | 0.627  | 0.531 | 1.206 | 0.36  | 0.572  | 0.567 | 0.672 | 2.164 |
| GRK6    | 0.54   | 0.301 | 1.795  | 0.073 | 1.716 | 0.516 | 1.387  | 0.165 | 0.952 | 3.093 |
| GRK5    | -0.2   | 0.298 | -0.671 | 0.502 | 0.819 | 0.244 | -0.743 | 0.457 | 0.457 | 1.468 |
| GRK4    | -0.3   | 0.3   | -1.001 | 0.317 | 0.741 | 0.222 | -1.168 | 0.243 | 0.412 | 1.333 |
| GRK3    | 0.035  | 0.295 | 0.119  | 0.905 | 1.036 | 0.306 | 0.117  | 0.907 | 0.581 | 1.847 |
| GRK2    | 0.027  | 0.297 | 0.093  | 0.926 | 1.028 | 0.305 | 0.091  | 0.927 | 0.575 | 1.838 |
| GRK1    | 0.248  | 0.298 | 0.832  | 0.405 | 1.281 | 0.381 | 0.737  | 0.461 | 0.715 | 2.296 |
| GRIP2   | 0.231  | 0.298 | 0.775  | 0.438 | 1.26  | 0.376 | 0.692  | 0.489 | 0.702 | 2.26  |
| GRIP1   | 0.011  | 0.295 | 0.037  | 0.971 | 1.011 | 0.298 | 0.036  | 0.971 | 0.567 | 1.803 |
| GRINA   | 0.219  | 0.298 | 0.735  | 0.462 | 1.245 | 0.371 | 0.66   | 0.509 | 0.694 | 2.232 |
| GRIN2D  | 0.498  | 0.303 | 1.647  | 0.1   | 1.646 | 0.498 | 1.297  | 0.195 | 0.91  | 2.979 |
| GRIN2C  | -0.311 | 0.298 | -1.046 | 0.295 | 0.733 | 0.218 | -1.227 | 0.22  | 0.409 | 1.312 |
| GRIN2B  | 0.323  | 0.298 | 1.086  | 0.277 | 1.382 | 0.411 | 0.928  | 0.353 | 0.771 | 2.476 |

|         |        |       |        |       |       |       |        |       |       |       |
|---------|--------|-------|--------|-------|-------|-------|--------|-------|-------|-------|
| GRIN2A  | -0.082 | 0.295 | -0.278 | 0.781 | 0.921 | 0.272 | -0.29  | 0.772 | 0.516 | 1.643 |
| GRIN1   | -0.256 | 0.297 | -0.861 | 0.389 | 0.774 | 0.23  | -0.982 | 0.326 | 0.432 | 1.387 |
| GRIK5   | -0.189 | 0.296 | -0.637 | 0.524 | 0.828 | 0.245 | -0.701 | 0.483 | 0.463 | 1.48  |
| GRIK4   | 0.072  | 0.296 | 0.243  | 0.808 | 1.075 | 0.318 | 0.235  | 0.815 | 0.602 | 1.919 |
| GRIK3   | -0.039 | 0.296 | -0.131 | 0.896 | 0.962 | 0.284 | -0.134 | 0.894 | 0.539 | 1.717 |
| GRIK2   | 0.446  | 0.3   | 1.489  | 0.137 | 1.562 | 0.468 | 1.201  | 0.23  | 0.868 | 2.81  |
| GRIK1   | 0.152  | 0.297 | 0.51   | 0.61  | 1.164 | 0.346 | 0.474  | 0.636 | 0.65  | 2.083 |
| GRID2   | 0.202  | 0.296 | 0.681  | 0.496 | 1.223 | 0.362 | 0.617  | 0.537 | 0.685 | 2.185 |
| GRIA4   | -0.238 | 0.3   | -0.794 | 0.427 | 0.788 | 0.236 | -0.897 | 0.37  | 0.438 | 1.419 |
| GRIA3   | -0.076 | 0.295 | -0.258 | 0.796 | 0.927 | 0.274 | -0.268 | 0.789 | 0.519 | 1.653 |
| GRIA2   | -0.101 | 0.295 | -0.34  | 0.734 | 0.904 | 0.267 | -0.358 | 0.72  | 0.507 | 1.613 |
| GRIA1   | 0.126  | 0.295 | 0.426  | 0.67  | 1.134 | 0.335 | 0.4    | 0.689 | 0.636 | 2.023 |
| GRHPR   | 0.177  | 0.296 | 0.599  | 0.549 | 1.194 | 0.354 | 0.549  | 0.583 | 0.668 | 2.135 |
| GRHL2   | 0.751  | 0.31  | 2.425  | 0.015 | 2.119 | 0.656 | 1.705  | 0.088 | 1.155 | 3.889 |
| GREM2   | -0.409 | 0.3   | -1.366 | 0.172 | 0.664 | 0.199 | -1.688 | 0.091 | 0.369 | 1.195 |
| GREM1   | -0.228 | 0.296 | -0.769 | 0.442 | 0.796 | 0.236 | -0.864 | 0.387 | 0.445 | 1.423 |
| GREB1L  | -0.392 | 0.3   | -1.308 | 0.191 | 0.676 | 0.202 | -1.601 | 0.109 | 0.376 | 1.216 |
| GREB1   | 0.07   | 0.296 | 0.237  | 0.813 | 1.072 | 0.317 | 0.228  | 0.819 | 0.601 | 1.914 |
| GRB7    | 0.097  | 0.296 | 0.328  | 0.743 | 1.102 | 0.326 | 0.313  | 0.754 | 0.617 | 1.967 |
| GRB2    | 0.545  | 0.3   | 1.813  | 0.07  | 1.724 | 0.518 | 1.398  | 0.162 | 0.957 | 3.106 |
| GRB14   | 0.439  | 0.3   | 1.462  | 0.144 | 1.551 | 0.465 | 1.184  | 0.236 | 0.861 | 2.791 |
| GRB10   | 0.615  | 0.306 | 2.012  | 0.044 | 1.849 | 0.565 | 1.503  | 0.133 | 1.016 | 3.366 |
| GRAP2   | 0.789  | 0.311 | 2.541  | 0.011 | 2.201 | 0.684 | 1.757  | 0.079 | 1.198 | 4.046 |
| GRAP    | 0.572  | 0.303 | 1.888  | 0.059 | 1.771 | 0.536 | 1.438  | 0.15  | 0.979 | 3.206 |
| GRAMD4  | -0.32  | 0.298 | -1.073 | 0.283 | 0.726 | 0.217 | -1.265 | 0.206 | 0.404 | 1.303 |
| GRAMD2B | -0.075 | 0.296 | -0.254 | 0.799 | 0.928 | 0.274 | -0.264 | 0.792 | 0.52  | 1.656 |
| GRAMD1C | -0.356 | 0.3   | -1.186 | 0.236 | 0.701 | 0.21  | -1.424 | 0.154 | 0.389 | 1.261 |
| GRAMD1B | 0.151  | 0.3   | 0.504  | 0.614 | 1.163 | 0.349 | 0.468  | 0.64  | 0.646 | 2.094 |
| GPX7    | -0.23  | 0.296 | -0.776 | 0.438 | 0.795 | 0.235 | -0.872 | 0.383 | 0.445 | 1.42  |
| GPX5    | -0.023 | 0.295 | -0.078 | 0.938 | 0.977 | 0.289 | -0.078 | 0.937 | 0.548 | 1.744 |
| GPX4    | -0.071 | 0.296 | -0.239 | 0.811 | 0.932 | 0.275 | -0.248 | 0.805 | 0.522 | 1.663 |
| GPX3    | -0.142 | 0.296 | -0.479 | 0.632 | 0.868 | 0.257 | -0.515 | 0.607 | 0.486 | 1.55  |
| GPX2    | 0.132  | 0.297 | 0.445  | 0.656 | 1.141 | 0.339 | 0.417  | 0.677 | 0.638 | 2.042 |
| GPX1    | 0.024  | 0.298 | 0.08   | 0.937 | 1.024 | 0.305 | 0.079  | 0.937 | 0.571 | 1.836 |
| GPT     | 0.217  | 0.296 | 0.735  | 0.462 | 1.243 | 0.368 | 0.661  | 0.509 | 0.696 | 2.219 |
| GPSM3   | -0.29  | 0.298 | -0.974 | 0.33  | 0.748 | 0.223 | -1.13  | 0.258 | 0.418 | 1.341 |
| GPSM2   | 0.78   | 0.307 | 2.544  | 0.011 | 2.182 | 0.669 | 1.766  | 0.077 | 1.196 | 3.98  |
| GPS2    | 0.057  | 0.296 | 0.191  | 0.848 | 1.058 | 0.313 | 0.186  | 0.852 | 0.593 | 1.889 |

|           |        |       |        |       |       |       |        |       |       |       |
|-----------|--------|-------|--------|-------|-------|-------|--------|-------|-------|-------|
| GPS1      | 0.205  | 0.296 | 0.693  | 0.488 | 1.228 | 0.364 | 0.627  | 0.531 | 0.687 | 2.194 |
| GPRIN2    | 0.728  | 0.306 | 2.376  | 0.017 | 2.071 | 0.635 | 1.688  | 0.091 | 1.136 | 3.775 |
| GPRC5D    | -0.022 | 0.295 | -0.075 | 0.94  | 0.978 | 0.289 | -0.076 | 0.94  | 0.548 | 1.745 |
| GPRC5C    | 0.25   | 0.297 | 0.841  | 0.4   | 1.283 | 0.381 | 0.745  | 0.457 | 0.718 | 2.296 |
| GPRC5B    | 0.139  | 0.299 | 0.465  | 0.642 | 1.149 | 0.343 | 0.434  | 0.664 | 0.64  | 2.064 |
| GPRC5A    | 0.562  | 0.303 | 1.853  | 0.064 | 1.754 | 0.532 | 1.418  | 0.156 | 0.968 | 3.178 |
| GPRASP1   | -0.218 | 0.296 | -0.737 | 0.461 | 0.804 | 0.238 | -0.823 | 0.411 | 0.451 | 1.436 |
| GPR88     | 0.285  | 0.298 | 0.956  | 0.339 | 1.329 | 0.396 | 0.832  | 0.405 | 0.742 | 2.382 |
| GPR87     | 0.227  | 0.296 | 0.767  | 0.443 | 1.255 | 0.372 | 0.686  | 0.493 | 0.702 | 2.242 |
| GPR85     | 0.184  | 0.296 | 0.622  | 0.534 | 1.202 | 0.355 | 0.568  | 0.57  | 0.673 | 2.145 |
| GPR75     | -0.209 | 0.295 | -0.707 | 0.479 | 0.811 | 0.24  | -0.787 | 0.432 | 0.455 | 1.448 |
| GPR68     | 0.21   | 0.296 | 0.709  | 0.478 | 1.234 | 0.365 | 0.64   | 0.522 | 0.69  | 2.205 |
| GPR65     | -0.118 | 0.295 | -0.4   | 0.689 | 0.889 | 0.262 | -0.424 | 0.671 | 0.498 | 1.585 |
| GPR63     | 0.754  | 0.306 | 2.461  | 0.014 | 2.125 | 0.651 | 1.728  | 0.084 | 1.166 | 3.874 |
| GPR6      | 0.317  | 0.298 | 1.063  | 0.288 | 1.373 | 0.409 | 0.911  | 0.362 | 0.766 | 2.461 |
| GPR52     | -0.306 | 0.298 | -1.028 | 0.304 | 0.736 | 0.219 | -1.203 | 0.229 | 0.411 | 1.32  |
| GPR50     | -0.274 | 0.298 | -0.92  | 0.357 | 0.76  | 0.226 | -1.059 | 0.29  | 0.424 | 1.362 |
| GPR45     | 0.088  | 0.296 | 0.296  | 0.767 | 1.092 | 0.323 | 0.283  | 0.777 | 0.611 | 1.95  |
| GPR4      | -0.65  | 0.31  | -2.1   | 0.036 | 0.522 | 0.162 | -2.958 | 0.003 | 0.284 | 0.958 |
| GPR39     | -0.534 | 0.304 | -1.76  | 0.078 | 0.586 | 0.178 | -2.326 | 0.02  | 0.323 | 1.063 |
| GPR37L1   | -0.046 | 0.296 | -0.156 | 0.876 | 0.955 | 0.282 | -0.159 | 0.874 | 0.535 | 1.704 |
| GPR37     | -0.117 | 0.295 | -0.395 | 0.693 | 0.89  | 0.263 | -0.418 | 0.676 | 0.499 | 1.588 |
| GPR35     | -0.138 | 0.296 | -0.467 | 0.64  | 0.871 | 0.258 | -0.501 | 0.616 | 0.488 | 1.555 |
| GPR32     | 0.113  | 0.295 | 0.383  | 0.701 | 1.12  | 0.331 | 0.362  | 0.717 | 0.628 | 1.998 |
| GPR31     | 0.139  | 0.296 | 0.468  | 0.639 | 1.149 | 0.341 | 0.437  | 0.662 | 0.643 | 2.054 |
| GPR3      | 0.145  | 0.296 | 0.489  | 0.625 | 1.156 | 0.342 | 0.455  | 0.649 | 0.647 | 2.065 |
| GPR27     | -0.143 | 0.296 | -0.484 | 0.628 | 0.867 | 0.256 | -0.52  | 0.603 | 0.485 | 1.548 |
| GPR25     | -0.036 | 0.298 | -0.12  | 0.904 | 0.965 | 0.287 | -0.122 | 0.903 | 0.538 | 1.73  |
| GPR22     | -0.209 | 0.298 | -0.702 | 0.483 | 0.811 | 0.242 | -0.781 | 0.435 | 0.453 | 1.454 |
| GPR21     | 0.031  | 0.295 | 0.105  | 0.917 | 1.031 | 0.305 | 0.103  | 0.918 | 0.578 | 1.84  |
| GPR20     | -0.53  | 0.302 | -1.752 | 0.08  | 0.589 | 0.178 | -2.309 | 0.021 | 0.326 | 1.065 |
| GPR19     | 0.413  | 0.3   | 1.38   | 0.168 | 1.512 | 0.453 | 1.13   | 0.258 | 0.841 | 2.72  |
| GPR183    | -0.226 | 0.296 | -0.762 | 0.446 | 0.798 | 0.236 | -0.855 | 0.392 | 0.446 | 1.426 |
| GPR182    | 0.148  | 0.299 | 0.495  | 0.621 | 1.16  | 0.347 | 0.46   | 0.645 | 0.645 | 2.084 |
| GPR18     | -0.547 | 0.303 | -1.805 | 0.071 | 0.579 | 0.175 | -2.403 | 0.016 | 0.32  | 1.048 |
| GPR176-DT | -0.282 | 0.297 | -0.95  | 0.342 | 0.754 | 0.224 | -1.098 | 0.272 | 0.421 | 1.35  |
| GPR176    | -0.38  | 0.3   | -1.268 | 0.205 | 0.684 | 0.205 | -1.542 | 0.123 | 0.38  | 1.23  |
| GPR173    | -0.489 | 0.3   | -1.628 | 0.103 | 0.613 | 0.184 | -2.1   | 0.036 | 0.34  | 1.105 |

|          |        |       |        |       |       |       |        |       |       |       |
|----------|--------|-------|--------|-------|-------|-------|--------|-------|-------|-------|
| GPR171   | -0.105 | 0.296 | -0.355 | 0.722 | 0.9   | 0.266 | -0.375 | 0.708 | 0.504 | 1.608 |
| GPR17    | 0.243  | 0.296 | 0.821  | 0.412 | 1.275 | 0.378 | 0.729  | 0.466 | 0.714 | 2.278 |
| GPR162   | -0.098 | 0.295 | -0.332 | 0.74  | 0.907 | 0.268 | -0.348 | 0.728 | 0.508 | 1.617 |
| GPR161   | 0.406  | 0.3   | 1.355  | 0.175 | 1.501 | 0.45  | 1.114  | 0.265 | 0.834 | 2.7   |
| GPR157   | 0.246  | 0.298 | 0.823  | 0.41  | 1.278 | 0.381 | 0.73   | 0.465 | 0.713 | 2.294 |
| GPR153   | -0.499 | 0.3   | -1.664 | 0.096 | 0.607 | 0.182 | -2.157 | 0.031 | 0.337 | 1.093 |
| GPR15    | 0.286  | 0.3   | 0.952  | 0.341 | 1.331 | 0.399 | 0.828  | 0.408 | 0.739 | 2.396 |
| GPR143   | 0.293  | 0.298 | 0.982  | 0.326 | 1.34  | 0.4   | 0.851  | 0.395 | 0.747 | 2.404 |
| GPR137B  | -0.11  | 0.296 | -0.372 | 0.71  | 0.896 | 0.265 | -0.394 | 0.694 | 0.502 | 1.599 |
| GPR137   | -0.766 | 0.315 | -2.435 | 0.015 | 0.465 | 0.146 | -3.661 | 0     | 0.251 | 0.861 |
| GPR135   | -0.244 | 0.298 | -0.819 | 0.413 | 0.784 | 0.233 | -0.927 | 0.354 | 0.437 | 1.404 |
| GPR132   | 0.445  | 0.3   | 1.482  | 0.138 | 1.56  | 0.468 | 1.196  | 0.232 | 0.866 | 2.809 |
| GPR12    | 0.706  | 0.31  | 2.279  | 0.023 | 2.026 | 0.627 | 1.635  | 0.102 | 1.104 | 3.717 |
| GPR107   | 0.245  | 0.297 | 0.826  | 0.409 | 1.278 | 0.379 | 0.733  | 0.464 | 0.714 | 2.287 |
| GPR1     | -0.151 | 0.296 | -0.51  | 0.61  | 0.86  | 0.255 | -0.551 | 0.582 | 0.481 | 1.537 |
| GPNMB    | -0.598 | 0.306 | -1.956 | 0.05  | 0.55  | 0.168 | -2.677 | 0.007 | 0.302 | 1.001 |
| GPN3     | -0.072 | 0.296 | -0.242 | 0.809 | 0.931 | 0.276 | -0.25  | 0.802 | 0.521 | 1.664 |
| GPN2     | 0.253  | 0.296 | 0.853  | 0.394 | 1.287 | 0.381 | 0.753  | 0.451 | 0.72  | 2.3   |
| GPN1     | 0.252  | 0.296 | 0.851  | 0.395 | 1.287 | 0.382 | 0.752  | 0.452 | 0.72  | 2.301 |
| GPM6B    | -0.349 | 0.3   | -1.167 | 0.243 | 0.705 | 0.211 | -1.397 | 0.163 | 0.392 | 1.268 |
| GPM6A    | -0.262 | 0.298 | -0.88  | 0.379 | 0.77  | 0.229 | -1.006 | 0.314 | 0.429 | 1.379 |
| GPLD1    | -0.497 | 0.303 | -1.643 | 0.1   | 0.608 | 0.184 | -2.128 | 0.033 | 0.336 | 1.101 |
| GPKOW    | -0.092 | 0.3   | -0.306 | 0.76  | 0.912 | 0.274 | -0.32  | 0.749 | 0.506 | 1.644 |
| GPI      | 0.28   | 0.296 | 0.947  | 0.344 | 1.324 | 0.392 | 0.826  | 0.409 | 0.741 | 2.365 |
| GPHN     | -0.652 | 0.31  | -2.105 | 0.035 | 0.521 | 0.161 | -2.969 | 0.003 | 0.284 | 0.956 |
| GPER1    | -0.514 | 0.306 | -1.681 | 0.093 | 0.598 | 0.183 | -2.197 | 0.028 | 0.329 | 1.089 |
| GPD2     | 0.001  | 0.295 | 0.003  | 0.997 | 1.001 | 0.296 | 0.003  | 0.997 | 0.561 | 1.786 |
| GPD1L    | -0.867 | 0.321 | -2.704 | 0.007 | 0.42  | 0.135 | -4.304 | 0     | 0.224 | 0.788 |
| GPD1     | 0.062  | 0.295 | 0.211  | 0.833 | 1.064 | 0.314 | 0.205  | 0.838 | 0.597 | 1.899 |
| GPC5     | 0.158  | 0.295 | 0.535  | 0.593 | 1.171 | 0.346 | 0.495  | 0.621 | 0.656 | 2.089 |
| GPC4     | -0.304 | 0.298 | -1.021 | 0.307 | 0.738 | 0.22  | -1.193 | 0.233 | 0.412 | 1.323 |
| GPC3     | 0.152  | 0.296 | 0.513  | 0.608 | 1.164 | 0.345 | 0.476  | 0.634 | 0.651 | 2.08  |
| GPC1     | 0.237  | 0.298 | 0.796  | 0.426 | 1.267 | 0.377 | 0.709  | 0.478 | 0.707 | 2.271 |
| GPBP1L1  | -0.623 | 0.305 | -2.045 | 0.041 | 0.536 | 0.163 | -2.838 | 0.005 | 0.295 | 0.974 |
| GPATCH8  | -0.053 | 0.298 | -0.179 | 0.858 | 0.948 | 0.282 | -0.184 | 0.854 | 0.529 | 1.7   |
| GPATCH4  | 0.11   | 0.3   | 0.367  | 0.714 | 1.116 | 0.335 | 0.348  | 0.728 | 0.62  | 2.01  |
| GPATCH3  | 0.393  | 0.297 | 1.323  | 0.186 | 1.481 | 0.439 | 1.095  | 0.274 | 0.828 | 2.648 |
| GPATCH2L | 0.214  | 0.296 | 0.723  | 0.47  | 1.239 | 0.367 | 0.651  | 0.515 | 0.693 | 2.213 |

|          |        |       |        |       |       |       |        |       |       |       |
|----------|--------|-------|--------|-------|-------|-------|--------|-------|-------|-------|
| GPATCH2  | 0.091  | 0.295 | 0.309  | 0.758 | 1.095 | 0.324 | 0.295  | 0.768 | 0.614 | 1.955 |
| GPATCH1  | 0.405  | 0.298 | 1.359  | 0.174 | 1.499 | 0.446 | 1.117  | 0.264 | 0.836 | 2.687 |
| GPALPP1  | 0.67   | 0.307 | 2.184  | 0.029 | 1.954 | 0.599 | 1.592  | 0.111 | 1.071 | 3.564 |
| GPAA1    | 0.504  | 0.303 | 1.664  | 0.096 | 1.655 | 0.501 | 1.307  | 0.191 | 0.914 | 2.997 |
| GPA33    | 0.33   | 0.304 | 1.087  | 0.277 | 1.391 | 0.423 | 0.925  | 0.355 | 0.767 | 2.525 |
| GP9      | -0.272 | 0.297 | -0.918 | 0.359 | 0.762 | 0.226 | -1.055 | 0.292 | 0.426 | 1.362 |
| GP6      | 0.276  | 0.298 | 0.927  | 0.354 | 1.318 | 0.393 | 0.81   | 0.418 | 0.735 | 2.363 |
| GP5      | 0.232  | 0.296 | 0.784  | 0.433 | 1.261 | 0.374 | 0.699  | 0.484 | 0.706 | 2.255 |
| GP2      | -0.492 | 0.302 | -1.629 | 0.103 | 0.611 | 0.185 | -2.104 | 0.035 | 0.338 | 1.105 |
| GP1BA    | 0.146  | 0.298 | 0.491  | 0.624 | 1.157 | 0.345 | 0.456  | 0.648 | 0.646 | 2.075 |
| GOT2     | -0.225 | 0.298 | -0.754 | 0.451 | 0.799 | 0.238 | -0.846 | 0.398 | 0.446 | 1.432 |
| GOT1     | 0.309  | 0.297 | 1.041  | 0.298 | 1.362 | 0.404 | 0.896  | 0.37  | 0.762 | 2.435 |
| GOSR2    | -0.289 | 0.298 | -0.972 | 0.331 | 0.749 | 0.223 | -1.127 | 0.26  | 0.418 | 1.342 |
| GOSR1    | -0.41  | 0.302 | -1.356 | 0.175 | 0.664 | 0.201 | -1.677 | 0.094 | 0.367 | 1.2   |
| GORASP2  | -0.075 | 0.296 | -0.254 | 0.8   | 0.928 | 0.274 | -0.264 | 0.792 | 0.519 | 1.657 |
| GORASP1  | -0.509 | 0.303 | -1.682 | 0.093 | 0.601 | 0.182 | -2.192 | 0.028 | 0.332 | 1.088 |
| GON4L    | -0.549 | 0.303 | -1.813 | 0.07  | 0.577 | 0.175 | -2.416 | 0.016 | 0.319 | 1.045 |
| GOLT1B   | -0.017 | 0.295 | -0.058 | 0.954 | 0.983 | 0.29  | -0.059 | 0.953 | 0.551 | 1.754 |
| GOLPH3L  | -0.495 | 0.306 | -1.616 | 0.106 | 0.61  | 0.187 | -2.09  | 0.037 | 0.334 | 1.111 |
| GOLPH3   | 0.036  | 0.295 | 0.123  | 0.902 | 1.037 | 0.306 | 0.121  | 0.904 | 0.582 | 1.849 |
| GOLM1    | -0.197 | 0.296 | -0.668 | 0.504 | 0.821 | 0.243 | -0.738 | 0.46  | 0.46  | 1.465 |
| GOLIM4   | 0.312  | 0.298 | 1.049  | 0.294 | 1.366 | 0.407 | 0.901  | 0.368 | 0.762 | 2.449 |
| GOLGB1   | -0.582 | 0.303 | -1.923 | 0.055 | 0.559 | 0.169 | -2.609 | 0.009 | 0.308 | 1.011 |
| GOLGA8N  | -0.612 | 0.306 | -2.003 | 0.045 | 0.542 | 0.166 | -2.762 | 0.006 | 0.298 | 0.987 |
| GOLGA8A  | -0.33  | 0.298 | -1.106 | 0.269 | 0.719 | 0.214 | -1.31  | 0.19  | 0.401 | 1.29  |
| GOLGA7   | -0.251 | 0.298 | -0.845 | 0.398 | 0.778 | 0.231 | -0.961 | 0.337 | 0.434 | 1.393 |
| GOLGA5   | -0.205 | 0.296 | -0.692 | 0.489 | 0.815 | 0.241 | -0.768 | 0.442 | 0.456 | 1.456 |
| GOLGA4   | 0.151  | 0.296 | 0.509  | 0.611 | 1.163 | 0.345 | 0.472  | 0.637 | 0.65  | 2.079 |
| GOLGA3   | -0.264 | 0.296 | -0.89  | 0.374 | 0.768 | 0.228 | -1.018 | 0.309 | 0.43  | 1.373 |
| GOLGA2P5 | -0.033 | 0.295 | -0.111 | 0.911 | 0.968 | 0.286 | -0.113 | 0.91  | 0.542 | 1.726 |
| GOLGA2   | 0.378  | 0.299 | 1.264  | 0.206 | 1.46  | 0.437 | 1.053  | 0.292 | 0.812 | 2.623 |
| GOLGA1   | -0.154 | 0.297 | -0.518 | 0.604 | 0.858 | 0.254 | -0.56  | 0.575 | 0.48  | 1.534 |
| GNS      | -0.156 | 0.296 | -0.527 | 0.598 | 0.856 | 0.253 | -0.57  | 0.569 | 0.479 | 1.529 |
| GNRHR    | -0.071 | 0.295 | -0.239 | 0.811 | 0.932 | 0.275 | -0.248 | 0.804 | 0.522 | 1.662 |
| GNRH2    | 0.279  | 0.298 | 0.935  | 0.35  | 1.322 | 0.394 | 0.816  | 0.414 | 0.737 | 2.37  |
| GNRH1    | -0.085 | 0.295 | -0.288 | 0.774 | 0.919 | 0.271 | -0.3   | 0.764 | 0.515 | 1.639 |
| GNPTAB   | -0.5   | 0.303 | -1.653 | 0.098 | 0.607 | 0.183 | -2.144 | 0.032 | 0.335 | 1.097 |
| GNPDA1   | -0.461 | 0.306 | -1.507 | 0.132 | 0.631 | 0.193 | -1.914 | 0.056 | 0.346 | 1.149 |

|       |        |       |        |       |       |       |        |       |       |       |
|-------|--------|-------|--------|-------|-------|-------|--------|-------|-------|-------|
| GNPAT | -0.566 | 0.306 | -1.852 | 0.064 | 0.568 | 0.174 | -2.49  | 0.013 | 0.312 | 1.034 |
| GNMT  | -0.483 | 0.3   | -1.611 | 0.107 | 0.617 | 0.185 | -2.071 | 0.038 | 0.343 | 1.11  |
| GNLY  | -0.028 | 0.296 | -0.093 | 0.926 | 0.973 | 0.288 | -0.095 | 0.925 | 0.545 | 1.737 |
| GNL3L | 0.111  | 0.296 | 0.374  | 0.708 | 1.117 | 0.331 | 0.354  | 0.723 | 0.625 | 1.997 |
| GNL2  | 0.315  | 0.297 | 1.06   | 0.289 | 1.37  | 0.407 | 0.909  | 0.363 | 0.766 | 2.451 |
| GNL1  | 0.428  | 0.3   | 1.43   | 0.153 | 1.535 | 0.46  | 1.163  | 0.245 | 0.853 | 2.762 |
| GNGT1 | 0.42   | 0.3   | 1.399  | 0.162 | 1.521 | 0.456 | 1.143  | 0.253 | 0.845 | 2.738 |
| GNG7  | -0.309 | 0.3   | -1.03  | 0.303 | 0.734 | 0.22  | -1.206 | 0.228 | 0.408 | 1.322 |
| GNG5  | 0.512  | 0.304 | 1.684  | 0.092 | 1.669 | 0.508 | 1.317  | 0.188 | 0.919 | 3.031 |
| GNG4  | 0.226  | 0.296 | 0.763  | 0.445 | 1.254 | 0.371 | 0.683  | 0.494 | 0.702 | 2.241 |
| GNG3  | 0.085  | 0.298 | 0.286  | 0.775 | 1.089 | 0.324 | 0.274  | 0.784 | 0.607 | 1.952 |
| GNG13 | 0.625  | 0.306 | 2.04   | 0.041 | 1.868 | 0.572 | 1.517  | 0.129 | 1.025 | 3.404 |
| GNG12 | -1.207 | 0.336 | -3.594 | 0     | 0.299 | 0.1   | -6.98  | 0     | 0.155 | 0.578 |
| GNG11 | -0.696 | 0.306 | -2.275 | 0.023 | 0.498 | 0.153 | -3.288 | 0.001 | 0.274 | 0.908 |
| GNE   | -0.187 | 0.296 | -0.63  | 0.529 | 0.83  | 0.246 | -0.692 | 0.489 | 0.464 | 1.483 |
| GNB5  | -0.054 | 0.299 | -0.181 | 0.856 | 0.947 | 0.283 | -0.186 | 0.853 | 0.527 | 1.702 |
| GNB3  | 0.542  | 0.3   | 1.808  | 0.071 | 1.72  | 0.516 | 1.396  | 0.163 | 0.955 | 3.095 |
| GNB2  | -0.228 | 0.298 | -0.765 | 0.444 | 0.796 | 0.238 | -0.859 | 0.39  | 0.444 | 1.429 |
| GNB1L | 0.014  | 0.295 | 0.047  | 0.963 | 1.014 | 0.3   | 0.047  | 0.963 | 0.568 | 1.809 |
| GNB1  | -0.555 | 0.306 | -1.815 | 0.069 | 0.574 | 0.176 | -2.427 | 0.015 | 0.315 | 1.045 |
| GNAZ  | 0.491  | 0.302 | 1.623  | 0.105 | 1.634 | 0.494 | 1.283  | 0.2   | 0.903 | 2.956 |
| GNAT3 | 0.082  | 0.296 | 0.277  | 0.782 | 1.085 | 0.321 | 0.266  | 0.79  | 0.608 | 1.938 |
| GNAT2 | -0.21  | 0.297 | -0.707 | 0.479 | 0.811 | 0.241 | -0.787 | 0.431 | 0.453 | 1.45  |
| GNAT1 | -0.102 | 0.296 | -0.345 | 0.73  | 0.903 | 0.267 | -0.363 | 0.716 | 0.506 | 1.612 |
| GNAS  | 0.175  | 0.296 | 0.591  | 0.555 | 1.191 | 0.352 | 0.542  | 0.588 | 0.667 | 2.125 |
| GNAQ  | -0.632 | 0.306 | -2.069 | 0.039 | 0.531 | 0.162 | -2.886 | 0.004 | 0.292 | 0.967 |
| GNAO1 | -0.072 | 0.296 | -0.242 | 0.809 | 0.931 | 0.276 | -0.25  | 0.802 | 0.521 | 1.663 |
| GNAL  | -0.635 | 0.302 | -2.099 | 0.036 | 0.53  | 0.16  | -2.931 | 0.003 | 0.293 | 0.959 |
| GNAI3 | 0.534  | 0.302 | 1.767  | 0.077 | 1.706 | 0.516 | 1.369  | 0.171 | 0.943 | 3.085 |
| GNAI2 | -1.043 | 0.328 | -3.183 | 0.001 | 0.352 | 0.115 | -5.609 | 0     | 0.185 | 0.67  |
| GNAI1 | -0.099 | 0.296 | -0.336 | 0.737 | 0.905 | 0.268 | -0.353 | 0.724 | 0.507 | 1.618 |
| GNA15 | 0.081  | 0.295 | 0.276  | 0.783 | 1.085 | 0.32  | 0.265  | 0.791 | 0.608 | 1.935 |
| GNA14 | -0.237 | 0.298 | -0.797 | 0.426 | 0.789 | 0.235 | -0.899 | 0.368 | 0.44  | 1.414 |
| GNA13 | -0.507 | 0.306 | -1.658 | 0.097 | 0.602 | 0.184 | -2.16  | 0.031 | 0.331 | 1.097 |
| GNA12 | 0.184  | 0.296 | 0.62   | 0.535 | 1.202 | 0.356 | 0.566  | 0.571 | 0.672 | 2.147 |
| GNA11 | 0.005  | 0.295 | 0.016  | 0.987 | 1.005 | 0.297 | 0.016  | 0.987 | 0.563 | 1.792 |
| GMPS  | 1.207  | 0.336 | 3.591  | 0     | 3.342 | 1.123 | 2.085  | 0.037 | 1.73  | 6.457 |
| GMPR2 | 0.13   | 0.296 | 0.439  | 0.661 | 1.139 | 0.337 | 0.412  | 0.68  | 0.637 | 2.036 |



|        |        |       |        |       |       |       |        |       |       |       |
|--------|--------|-------|--------|-------|-------|-------|--------|-------|-------|-------|
| GMPR   | 0.465  | 0.302 | 1.538  | 0.124 | 1.592 | 0.481 | 1.23   | 0.219 | 0.88  | 2.878 |
| GMPPA  | -0.336 | 0.298 | -1.128 | 0.259 | 0.715 | 0.213 | -1.34  | 0.18  | 0.399 | 1.281 |
| GMNN   | 0.24   | 0.298 | 0.806  | 0.421 | 1.271 | 0.379 | 0.716  | 0.474 | 0.709 | 2.28  |
| GML    | 0.123  | 0.297 | 0.414  | 0.679 | 1.131 | 0.336 | 0.39   | 0.697 | 0.632 | 2.024 |
| GMIP   | 0.002  | 0.296 | 0.008  | 0.994 | 1.002 | 0.296 | 0.008  | 0.994 | 0.561 | 1.789 |
| GMFG   | -0.169 | 0.296 | -0.571 | 0.568 | 0.844 | 0.25  | -0.622 | 0.534 | 0.472 | 1.509 |
| GMFB   | 0.061  | 0.295 | 0.208  | 0.835 | 1.063 | 0.314 | 0.201  | 0.84  | 0.596 | 1.897 |
| GMEB2  | 0.945  | 0.315 | 2.999  | 0.003 | 2.573 | 0.811 | 1.94   | 0.052 | 1.387 | 4.773 |
| GMEB1  | 0.357  | 0.298 | 1.198  | 0.231 | 1.429 | 0.426 | 1.008  | 0.314 | 0.797 | 2.564 |
| GMDS   | -0.183 | 0.296 | -0.619 | 0.536 | 0.833 | 0.247 | -0.679 | 0.497 | 0.466 | 1.488 |
| GM2A   | -0.164 | 0.296 | -0.556 | 0.578 | 0.848 | 0.251 | -0.605 | 0.545 | 0.475 | 1.514 |
| GLYR1  | -0.1   | 0.295 | -0.339 | 0.735 | 0.905 | 0.267 | -0.356 | 0.722 | 0.507 | 1.614 |
| GLYAT  | -0.305 | 0.297 | -1.024 | 0.306 | 0.737 | 0.219 | -1.197 | 0.231 | 0.412 | 1.321 |
| GLUL   | -0.133 | 0.296 | -0.45  | 0.653 | 0.875 | 0.259 | -0.481 | 0.63  | 0.49  | 1.564 |
| GLUD2  | -0.483 | 0.306 | -1.579 | 0.114 | 0.617 | 0.189 | -2.029 | 0.042 | 0.339 | 1.124 |
| GLUD1  | -0.053 | 0.295 | -0.18  | 0.857 | 0.948 | 0.28  | -0.185 | 0.853 | 0.531 | 1.692 |
| GLTP   | 0.216  | 0.296 | 0.731  | 0.465 | 1.242 | 0.368 | 0.657  | 0.511 | 0.695 | 2.219 |
| GLT8D2 | -0.704 | 0.306 | -2.302 | 0.021 | 0.494 | 0.151 | -3.342 | 0.001 | 0.272 | 0.901 |
| GLT8D1 | -0.477 | 0.306 | -1.556 | 0.12  | 0.621 | 0.19  | -1.993 | 0.046 | 0.341 | 1.132 |
| GLS2   | -0.261 | 0.3   | -0.872 | 0.383 | 0.77  | 0.231 | -0.997 | 0.319 | 0.428 | 1.386 |
| GLS    | -0.192 | 0.297 | -0.646 | 0.518 | 0.825 | 0.245 | -0.713 | 0.476 | 0.461 | 1.477 |
| GLRX5  | 0.303  | 0.3   | 1.009  | 0.313 | 1.354 | 0.407 | 0.871  | 0.384 | 0.752 | 2.44  |
| GLRX3  | -0.011 | 0.296 | -0.036 | 0.971 | 0.989 | 0.293 | -0.037 | 0.971 | 0.553 | 1.769 |
| GLRX2  | 0.594  | 0.303 | 1.959  | 0.05  | 1.811 | 0.549 | 1.477  | 0.14  | 1     | 3.282 |
| GLRX   | -0.105 | 0.295 | -0.354 | 0.723 | 0.901 | 0.266 | -0.374 | 0.709 | 0.505 | 1.607 |
| GLRB   | -0.859 | 0.321 | -2.68  | 0.007 | 0.424 | 0.136 | -4.246 | 0     | 0.226 | 0.794 |
| GLRA3  | 0.335  | 0.298 | 1.126  | 0.26  | 1.398 | 0.416 | 0.957  | 0.339 | 0.78  | 2.506 |
| GLRA2  | 0.197  | 0.296 | 0.665  | 0.506 | 1.218 | 0.361 | 0.603  | 0.546 | 0.681 | 2.176 |
| GLRA1  | 0.2    | 0.296 | 0.677  | 0.499 | 1.222 | 0.362 | 0.613  | 0.54  | 0.684 | 2.183 |
| GLP2R  | -0.092 | 0.295 | -0.31  | 0.756 | 0.913 | 0.269 | -0.325 | 0.745 | 0.512 | 1.628 |
| GLP1R  | 0.147  | 0.298 | 0.491  | 0.623 | 1.158 | 0.346 | 0.457  | 0.648 | 0.645 | 2.078 |
| GLOD4  | -0.031 | 0.295 | -0.104 | 0.917 | 0.97  | 0.286 | -0.105 | 0.916 | 0.544 | 1.73  |
| GLO1   | 0.47   | 0.3   | 1.566  | 0.117 | 1.6   | 0.48  | 1.249  | 0.212 | 0.888 | 2.881 |
| GLMN   | 0.127  | 0.295 | 0.43   | 0.667 | 1.135 | 0.335 | 0.404  | 0.687 | 0.636 | 2.026 |
| GLIPR1 | -0.758 | 0.31  | -2.446 | 0.014 | 0.468 | 0.145 | -3.66  | 0     | 0.255 | 0.86  |
| GLI3   | -0.431 | 0.3   | -1.437 | 0.151 | 0.65  | 0.195 | -1.796 | 0.073 | 0.361 | 1.17  |
| GLI2   | -0.217 | 0.296 | -0.735 | 0.462 | 0.805 | 0.238 | -0.821 | 0.411 | 0.451 | 1.436 |
| GLI1   | -0.118 | 0.295 | -0.399 | 0.69  | 0.889 | 0.262 | -0.424 | 0.672 | 0.498 | 1.585 |

|        |        |       |        |       |       |       |        |       |       |       |
|--------|--------|-------|--------|-------|-------|-------|--------|-------|-------|-------|
| GLG1   | 0.096  | 0.295 | 0.325  | 0.745 | 1.101 | 0.325 | 0.31   | 0.757 | 0.617 | 1.963 |
| GLE1   | -0.292 | 0.298 | -0.98  | 0.327 | 0.746 | 0.223 | -1.138 | 0.255 | 0.416 | 1.34  |
| GLDC   | -0.04  | 0.295 | -0.134 | 0.893 | 0.961 | 0.284 | -0.137 | 0.891 | 0.539 | 1.714 |
| GLCE   | 0.137  | 0.297 | 0.46   | 0.646 | 1.146 | 0.34  | 0.43   | 0.667 | 0.641 | 2.051 |
| GLB1L2 | -0.004 | 0.295 | -0.014 | 0.989 | 0.996 | 0.294 | -0.014 | 0.989 | 0.558 | 1.776 |
| GLB1L  | -0.383 | 0.303 | -1.262 | 0.207 | 0.682 | 0.207 | -1.538 | 0.124 | 0.376 | 1.236 |
| GLA    | -0.349 | 0.3   | -1.166 | 0.244 | 0.705 | 0.211 | -1.395 | 0.163 | 0.392 | 1.269 |
| GKN1   | -0.145 | 0.297 | -0.488 | 0.626 | 0.865 | 0.257 | -0.525 | 0.6   | 0.483 | 1.549 |
| GK3P   | -0.565 | 0.306 | -1.849 | 0.064 | 0.568 | 0.174 | -2.486 | 0.013 | 0.312 | 1.034 |
| GK2    | 0.262  | 0.298 | 0.88   | 0.379 | 1.3   | 0.388 | 0.774  | 0.439 | 0.724 | 2.333 |
| GK     | -0.175 | 0.297 | -0.591 | 0.554 | 0.839 | 0.249 | -0.646 | 0.518 | 0.469 | 1.501 |
| GJD2   | 0.22   | 0.296 | 0.741  | 0.459 | 1.246 | 0.369 | 0.666  | 0.506 | 0.697 | 2.226 |
| GJC2   | 0.525  | 0.303 | 1.734  | 0.083 | 1.691 | 0.512 | 1.349  | 0.177 | 0.934 | 3.062 |
| GJC1   | -0.212 | 0.298 | -0.711 | 0.477 | 0.809 | 0.241 | -0.792 | 0.428 | 0.452 | 1.45  |
| GJB5   | -0.109 | 0.296 | -0.367 | 0.714 | 0.897 | 0.266 | -0.388 | 0.698 | 0.502 | 1.603 |
| GJB4   | 0.334  | 0.303 | 1.101  | 0.271 | 1.396 | 0.423 | 0.936  | 0.349 | 0.771 | 2.529 |
| GJB3   | -0.012 | 0.295 | -0.04  | 0.968 | 0.988 | 0.292 | -0.041 | 0.968 | 0.554 | 1.762 |
| GJB1   | -0.167 | 0.296 | -0.562 | 0.574 | 0.847 | 0.251 | -0.612 | 0.541 | 0.474 | 1.513 |
| GJA8   | -0.253 | 0.298 | -0.85  | 0.395 | 0.777 | 0.231 | -0.967 | 0.333 | 0.433 | 1.391 |
| GJA5   | -1.15  | 0.337 | -3.415 | 0.001 | 0.317 | 0.107 | -6.41  | 0     | 0.164 | 0.613 |
| GJA4   | -0.168 | 0.297 | -0.564 | 0.573 | 0.846 | 0.251 | -0.614 | 0.539 | 0.473 | 1.514 |
| GJA3   | 0.424  | 0.3   | 1.416  | 0.157 | 1.529 | 0.458 | 1.154  | 0.248 | 0.85  | 2.75  |
| GJA1   | -1.469 | 0.359 | -4.095 | 0     | 0.23  | 0.083 | -9.327 | 0     | 0.114 | 0.465 |
| GIT2   | -0.108 | 0.295 | -0.366 | 0.714 | 0.897 | 0.265 | -0.387 | 0.699 | 0.503 | 1.601 |
| GIT1   | 0.792  | 0.311 | 2.548  | 0.011 | 2.207 | 0.685 | 1.76   | 0.078 | 1.2   | 4.056 |
| GIPR   | 0.177  | 0.296 | 0.599  | 0.549 | 1.194 | 0.354 | 0.549  | 0.583 | 0.668 | 2.133 |
| GIPC2  | -0.422 | 0.3   | -1.409 | 0.159 | 0.656 | 0.197 | -1.753 | 0.08  | 0.364 | 1.18  |
| GIPC1  | 0.635  | 0.305 | 2.082  | 0.037 | 1.887 | 0.576 | 1.541  | 0.123 | 1.038 | 3.431 |
| GIP    | -0.139 | 0.295 | -0.47  | 0.638 | 0.87  | 0.257 | -0.504 | 0.614 | 0.488 | 1.553 |
| GINS4  | 0.808  | 0.31  | 2.607  | 0.009 | 2.244 | 0.696 | 1.788  | 0.074 | 1.222 | 4.119 |
| GINS3  | 0.489  | 0.302 | 1.617  | 0.106 | 1.631 | 0.493 | 1.279  | 0.201 | 0.902 | 2.949 |
| GINS2  | 0.754  | 0.306 | 2.464  | 0.014 | 2.126 | 0.651 | 1.73   | 0.084 | 1.167 | 3.874 |
| GINS1  | 0.574  | 0.302 | 1.9    | 0.057 | 1.776 | 0.537 | 1.446  | 0.148 | 0.982 | 3.212 |
| GIN1   | 0.152  | 0.296 | 0.512  | 0.609 | 1.164 | 0.345 | 0.475  | 0.635 | 0.651 | 2.08  |
| GIMAP6 | -1.028 | 0.321 | -3.198 | 0.001 | 0.358 | 0.115 | -5.585 | 0     | 0.191 | 0.672 |
| GIMAP4 | -0.511 | 0.302 | -1.689 | 0.091 | 0.6   | 0.181 | -2.205 | 0.027 | 0.332 | 1.085 |
| GIGYF2 | -0.559 | 0.303 | -1.846 | 0.065 | 0.572 | 0.173 | -2.474 | 0.013 | 0.316 | 1.035 |
| GID8   | 0.264  | 0.302 | 0.874  | 0.382 | 1.303 | 0.394 | 0.768  | 0.442 | 0.72  | 2.356 |

|        |        |       |        |       |       |       |        |       |       |       |
|--------|--------|-------|--------|-------|-------|-------|--------|-------|-------|-------|
| GID4   | 0.183  | 0.296 | 0.616  | 0.538 | 1.2   | 0.355 | 0.563  | 0.573 | 0.672 | 2.145 |
| GHSR   | -0.736 | 0.31  | -2.372 | 0.018 | 0.479 | 0.149 | -3.506 | 0     | 0.261 | 0.88  |
| GHRHR  | 0.255  | 0.298 | 0.858  | 0.391 | 1.291 | 0.384 | 0.757  | 0.449 | 0.72  | 2.313 |
| GHRH   | 0.058  | 0.295 | 0.197  | 0.844 | 1.06  | 0.313 | 0.191  | 0.849 | 0.594 | 1.891 |
| GHR    | -0.136 | 0.295 | -0.461 | 0.645 | 0.873 | 0.258 | -0.494 | 0.621 | 0.489 | 1.557 |
| GHITM  | 0.313  | 0.296 | 1.057  | 0.291 | 1.368 | 0.405 | 0.907  | 0.364 | 0.765 | 2.444 |
| GH2    | 0.176  | 0.296 | 0.595  | 0.552 | 1.193 | 0.353 | 0.546  | 0.585 | 0.667 | 2.132 |
| GH1    | 0.491  | 0.3   | 1.637  | 0.102 | 1.634 | 0.49  | 1.293  | 0.196 | 0.908 | 2.942 |
| GGTLC1 | 0.077  | 0.296 | 0.26   | 0.795 | 1.08  | 0.319 | 0.25   | 0.803 | 0.605 | 1.927 |
| GGT5   | -0.248 | 0.298 | -0.832 | 0.406 | 0.781 | 0.233 | -0.944 | 0.345 | 0.435 | 1.399 |
| GGPS1  | -0.295 | 0.298 | -0.992 | 0.321 | 0.744 | 0.221 | -1.154 | 0.248 | 0.415 | 1.334 |
| GGNBP2 | 0.091  | 0.296 | 0.307  | 0.759 | 1.095 | 0.324 | 0.294  | 0.769 | 0.614 | 1.954 |
| GGH    | 0.491  | 0.302 | 1.623  | 0.105 | 1.633 | 0.494 | 1.282  | 0.2   | 0.903 | 2.954 |
| GGCX   | 0.145  | 0.296 | 0.49   | 0.624 | 1.156 | 0.343 | 0.456  | 0.648 | 0.647 | 2.066 |
| GGCT   | 0.338  | 0.301 | 1.122  | 0.262 | 1.402 | 0.422 | 0.952  | 0.341 | 0.777 | 2.529 |
| GGA3   | 0.139  | 0.297 | 0.468  | 0.64  | 1.149 | 0.341 | 0.437  | 0.662 | 0.642 | 2.055 |
| GGA2   | -0.171 | 0.296 | -0.578 | 0.563 | 0.843 | 0.249 | -0.631 | 0.528 | 0.472 | 1.505 |
| GGA1   | 0.081  | 0.295 | 0.274  | 0.784 | 1.084 | 0.32  | 0.263  | 0.793 | 0.608 | 1.935 |
| GFUS   | 0.086  | 0.297 | 0.289  | 0.773 | 1.09  | 0.323 | 0.277  | 0.782 | 0.609 | 1.949 |
| GFRA4  | 0.304  | 0.297 | 1.023  | 0.306 | 1.355 | 0.402 | 0.882  | 0.378 | 0.757 | 2.425 |
| GFRA3  | 0.065  | 0.296 | 0.22   | 0.826 | 1.067 | 0.316 | 0.213  | 0.831 | 0.598 | 1.907 |
| GFRA2  | 0.44   | 0.302 | 1.455  | 0.146 | 1.553 | 0.47  | 1.177  | 0.239 | 0.858 | 2.809 |
| GFRA1  | 0.436  | 0.3   | 1.456  | 0.145 | 1.547 | 0.464 | 1.18   | 0.238 | 0.86  | 2.783 |
| GFPT2  | -1.05  | 0.321 | -3.266 | 0.001 | 0.35  | 0.112 | -5.78  | 0     | 0.186 | 0.657 |
| GFPT1  | -0.154 | 0.296 | -0.521 | 0.602 | 0.857 | 0.254 | -0.564 | 0.573 | 0.479 | 1.531 |
| GFOD2  | 0.027  | 0.296 | 0.09   | 0.928 | 1.027 | 0.303 | 0.089  | 0.929 | 0.575 | 1.833 |
| GFOD1  | 0.367  | 0.3   | 1.225  | 0.22  | 1.444 | 0.433 | 1.026  | 0.305 | 0.802 | 2.597 |
| GFM1   | 0.564  | 0.302 | 1.865  | 0.062 | 1.757 | 0.531 | 1.425  | 0.154 | 0.972 | 3.179 |
| GFI1B  | -0.937 | 0.316 | -2.969 | 0.003 | 0.392 | 0.124 | -4.919 | 0     | 0.211 | 0.727 |
| GFI1   | -0.112 | 0.296 | -0.377 | 0.706 | 0.894 | 0.264 | -0.399 | 0.69  | 0.501 | 1.596 |
| GFER   | -0.158 | 0.296 | -0.534 | 0.593 | 0.854 | 0.253 | -0.579 | 0.563 | 0.478 | 1.525 |
| GFAP   | 0.111  | 0.296 | 0.374  | 0.709 | 1.117 | 0.331 | 0.354  | 0.724 | 0.625 | 1.997 |
| GET3   | -0.194 | 0.302 | -0.643 | 0.52  | 0.823 | 0.249 | -0.71  | 0.478 | 0.455 | 1.489 |
| GET1   | -0.139 | 0.298 | -0.467 | 0.641 | 0.87  | 0.26  | -0.501 | 0.617 | 0.485 | 1.561 |
| GEMIN8 | -0.603 | 0.306 | -1.971 | 0.049 | 0.547 | 0.167 | -2.705 | 0.007 | 0.301 | 0.997 |
| GEMIN7 | 0.102  | 0.295 | 0.347  | 0.729 | 1.108 | 0.327 | 0.33   | 0.742 | 0.621 | 1.977 |
| GEMIN6 | 0.261  | 0.298 | 0.877  | 0.38  | 1.298 | 0.387 | 0.772  | 0.44  | 0.724 | 2.327 |
| GEMIN4 | 0.425  | 0.3   | 1.419  | 0.156 | 1.529 | 0.458 | 1.156  | 0.248 | 0.85  | 2.751 |

|         |        |       |        |       |       |       |        |       |       |       |
|---------|--------|-------|--------|-------|-------|-------|--------|-------|-------|-------|
| GEMIN2  | -0.357 | 0.299 | -1.195 | 0.232 | 0.7   | 0.209 | -1.437 | 0.151 | 0.39  | 1.257 |
| GEM     | -0.142 | 0.296 | -0.48  | 0.631 | 0.868 | 0.257 | -0.515 | 0.606 | 0.486 | 1.549 |
| GDPD5   | 0.431  | 0.3   | 1.437  | 0.151 | 1.538 | 0.461 | 1.167  | 0.243 | 0.855 | 2.768 |
| GDPD3   | -0.337 | 0.297 | -1.134 | 0.257 | 0.714 | 0.212 | -1.349 | 0.177 | 0.398 | 1.278 |
| GDPD2   | -0.037 | 0.295 | -0.125 | 0.901 | 0.964 | 0.284 | -0.127 | 0.899 | 0.541 | 1.719 |
| GDNF    | 1.038  | 0.328 | 3.167  | 0.002 | 2.822 | 0.925 | 1.971  | 0.049 | 1.485 | 5.364 |
| GDI2    | -0.097 | 0.297 | -0.328 | 0.743 | 0.907 | 0.269 | -0.345 | 0.73  | 0.507 | 1.623 |
| GDI1    | -0.03  | 0.295 | -0.102 | 0.918 | 0.97  | 0.286 | -0.104 | 0.917 | 0.544 | 1.731 |
| GDF9    | 0.083  | 0.296 | 0.279  | 0.78  | 1.086 | 0.321 | 0.268  | 0.789 | 0.608 | 1.938 |
| GDF5    | -0.301 | 0.3   | -1.006 | 0.314 | 0.74  | 0.222 | -1.174 | 0.24  | 0.411 | 1.331 |
| GDF3    | -0.179 | 0.296 | -0.605 | 0.545 | 0.836 | 0.248 | -0.663 | 0.508 | 0.468 | 1.494 |
| GDF2    | -0.767 | 0.31  | -2.475 | 0.013 | 0.464 | 0.144 | -3.722 | 0     | 0.253 | 0.852 |
| GDF15   | 0.084  | 0.295 | 0.284  | 0.777 | 1.087 | 0.321 | 0.272  | 0.785 | 0.609 | 1.941 |
| GDF11   | 0.19   | 0.296 | 0.642  | 0.521 | 1.21  | 0.358 | 0.585  | 0.559 | 0.677 | 2.161 |
| GDF10   | -1.083 | 0.319 | -3.401 | 0.001 | 0.338 | 0.108 | -6.135 | 0     | 0.181 | 0.632 |
| GDE1    | -0.791 | 0.315 | -2.514 | 0.012 | 0.453 | 0.143 | -3.831 | 0     | 0.245 | 0.84  |
| GDAP2   | 0.05   | 0.295 | 0.168  | 0.866 | 1.051 | 0.31  | 0.164  | 0.87  | 0.589 | 1.874 |
| GDAP1L1 | 0.663  | 0.303 | 2.187  | 0.029 | 1.941 | 0.589 | 1.598  | 0.11  | 1.071 | 3.517 |
| GDAP1   | -0.566 | 0.306 | -1.852 | 0.064 | 0.568 | 0.174 | -2.49  | 0.013 | 0.312 | 1.034 |
| GCSH    | 0.359  | 0.298 | 1.205  | 0.228 | 1.432 | 0.426 | 1.012  | 0.311 | 0.799 | 2.566 |
| GCNT4   | 0.091  | 0.295 | 0.308  | 0.758 | 1.095 | 0.323 | 0.294  | 0.768 | 0.614 | 1.954 |
| GCNT3   | 0.278  | 0.298 | 0.932  | 0.351 | 1.32  | 0.394 | 0.814  | 0.416 | 0.736 | 2.368 |
| GCNT2   | 0.228  | 0.296 | 0.771  | 0.441 | 1.256 | 0.372 | 0.689  | 0.491 | 0.703 | 2.245 |
| GCNT1   | 0.184  | 0.298 | 0.619  | 0.536 | 1.203 | 0.358 | 0.566  | 0.572 | 0.671 | 2.155 |
| GCN1    | 0.115  | 0.298 | 0.385  | 0.7   | 1.122 | 0.335 | 0.364  | 0.716 | 0.625 | 2.014 |
| GCM2    | 0.278  | 0.298 | 0.933  | 0.351 | 1.32  | 0.393 | 0.815  | 0.415 | 0.737 | 2.366 |
| GCM1    | -0.195 | 0.296 | -0.658 | 0.51  | 0.823 | 0.244 | -0.727 | 0.467 | 0.46  | 1.47  |
| GCLM    | 0.065  | 0.296 | 0.218  | 0.827 | 1.067 | 0.316 | 0.211  | 0.833 | 0.597 | 1.907 |
| GCLC    | 0.221  | 0.295 | 0.749  | 0.454 | 1.248 | 0.369 | 0.672  | 0.502 | 0.699 | 2.226 |
| GCKR    | 0.01   | 0.295 | 0.033  | 0.974 | 1.01  | 0.298 | 0.032  | 0.974 | 0.566 | 1.8   |
| GCK     | 0.009  | 0.296 | 0.032  | 0.975 | 1.009 | 0.299 | 0.031  | 0.975 | 0.565 | 1.804 |
| GCHFR   | 0.44   | 0.299 | 1.474  | 0.141 | 1.553 | 0.464 | 1.192  | 0.233 | 0.865 | 2.789 |
| GCH1    | 0.145  | 0.295 | 0.491  | 0.623 | 1.156 | 0.341 | 0.457  | 0.647 | 0.648 | 2.062 |
| GCGR    | 0.379  | 0.3   | 1.263  | 0.207 | 1.46  | 0.438 | 1.051  | 0.293 | 0.811 | 2.628 |
| GCG     | -0.024 | 0.295 | -0.083 | 0.934 | 0.976 | 0.288 | -0.084 | 0.933 | 0.547 | 1.74  |
| GCFC2   | 0.324  | 0.297 | 1.091  | 0.275 | 1.383 | 0.411 | 0.932  | 0.351 | 0.773 | 2.475 |
| GCDH    | 0.486  | 0.299 | 1.625  | 0.104 | 1.626 | 0.486 | 1.287  | 0.198 | 0.905 | 2.923 |
| GCC2    | -0.456 | 0.3   | -1.519 | 0.129 | 0.634 | 0.19  | -1.925 | 0.054 | 0.352 | 1.142 |

|          |        |       |        |       |       |       |        |       |       |       |
|----------|--------|-------|--------|-------|-------|-------|--------|-------|-------|-------|
| GCC1     | -0.424 | 0.298 | -1.422 | 0.155 | 0.654 | 0.195 | -1.772 | 0.076 | 0.365 | 1.174 |
| GCA7     | -0.065 | 0.296 | -0.219 | 0.826 | 0.937 | 0.277 | -0.227 | 0.821 | 0.525 | 1.674 |
| GCA      | 0.576  | 0.303 | 1.905  | 0.057 | 1.78  | 0.539 | 1.447  | 0.148 | 0.983 | 3.221 |
| GC       | -0.587 | 0.305 | -1.921 | 0.055 | 0.556 | 0.17  | -2.613 | 0.009 | 0.306 | 1.012 |
| GBX2     | -0.007 | 0.296 | -0.022 | 0.982 | 0.993 | 0.294 | -0.022 | 0.982 | 0.557 | 1.773 |
| GBX1     | -0.327 | 0.298 | -1.098 | 0.272 | 0.721 | 0.215 | -1.299 | 0.194 | 0.402 | 1.293 |
| GBP2     | -0.474 | 0.3   | -1.579 | 0.114 | 0.623 | 0.187 | -2.02  | 0.043 | 0.346 | 1.121 |
| GBP1     | 0.359  | 0.3   | 1.195  | 0.232 | 1.431 | 0.429 | 1.004  | 0.315 | 0.795 | 2.577 |
| GBF1     | -0.222 | 0.296 | -0.751 | 0.453 | 0.801 | 0.237 | -0.841 | 0.401 | 0.448 | 1.431 |
| GBE1     | 0.119  | 0.296 | 0.401  | 0.688 | 1.126 | 0.333 | 0.379  | 0.705 | 0.631 | 2.009 |
| GBAP1    | 0.23   | 0.296 | 0.776  | 0.438 | 1.258 | 0.373 | 0.693  | 0.488 | 0.704 | 2.248 |
| GBA3     | 0.304  | 0.297 | 1.025  | 0.305 | 1.356 | 0.403 | 0.884  | 0.377 | 0.758 | 2.427 |
| GATM     | -0.491 | 0.302 | -1.623 | 0.105 | 0.612 | 0.185 | -2.095 | 0.036 | 0.338 | 1.107 |
| GATD3A   | 0.365  | 0.298 | 1.224  | 0.221 | 1.44  | 0.429 | 1.025  | 0.305 | 0.803 | 2.584 |
| GATC     | -0.164 | 0.296 | -0.555 | 0.579 | 0.848 | 0.251 | -0.603 | 0.546 | 0.475 | 1.517 |
| GATB     | 0.088  | 0.295 | 0.297  | 0.767 | 1.092 | 0.323 | 0.284  | 0.776 | 0.612 | 1.948 |
| GATAD2A  | 0.659  | 0.31  | 2.124  | 0.034 | 1.932 | 0.599 | 1.556  | 0.12  | 1.052 | 3.549 |
| GATAD1   | 0.081  | 0.296 | 0.275  | 0.784 | 1.085 | 0.321 | 0.264  | 0.792 | 0.607 | 1.937 |
| GATA6    | -0.908 | 0.317 | -2.867 | 0.004 | 0.404 | 0.128 | -4.67  | 0     | 0.217 | 0.75  |
| GATA4    | 0.109  | 0.295 | 0.371  | 0.711 | 1.116 | 0.329 | 0.351  | 0.726 | 0.625 | 1.99  |
| GATA3    | -0.213 | 0.298 | -0.714 | 0.475 | 0.809 | 0.241 | -0.796 | 0.426 | 0.451 | 1.449 |
| GATA2    | -0.144 | 0.296 | -0.487 | 0.627 | 0.866 | 0.256 | -0.523 | 0.601 | 0.485 | 1.547 |
| GATA1    | -0.412 | 0.3   | -1.376 | 0.169 | 0.662 | 0.198 | -1.703 | 0.089 | 0.368 | 1.191 |
| GAST     | 0.082  | 0.295 | 0.278  | 0.781 | 1.085 | 0.32  | 0.267  | 0.79  | 0.609 | 1.935 |
| GASK1B   | -1.534 | 0.372 | -4.119 | 0     | 0.216 | 0.08  | -9.765 | 0     | 0.104 | 0.447 |
| GAS8-AS1 | 0.133  | 0.296 | 0.451  | 0.652 | 1.143 | 0.338 | 0.422  | 0.673 | 0.64  | 2.039 |
| GAS8     | -0.082 | 0.295 | -0.277 | 0.782 | 0.921 | 0.272 | -0.289 | 0.773 | 0.517 | 1.644 |
| GAS7     | -0.292 | 0.296 | -0.985 | 0.325 | 0.747 | 0.221 | -1.143 | 0.253 | 0.418 | 1.335 |
| GAS6     | -0.124 | 0.296 | -0.42  | 0.674 | 0.883 | 0.261 | -0.447 | 0.655 | 0.495 | 1.576 |
| GAS2L1   | 0.531  | 0.302 | 1.758  | 0.079 | 1.701 | 0.514 | 1.364  | 0.173 | 0.941 | 3.077 |
| GAS2     | 0.17   | 0.296 | 0.574  | 0.566 | 1.185 | 0.351 | 0.528  | 0.597 | 0.663 | 2.118 |
| GAS1     | -0.271 | 0.296 | -0.914 | 0.361 | 0.763 | 0.226 | -1.049 | 0.294 | 0.427 | 1.364 |
| GART     | 0.1    | 0.295 | 0.34   | 0.734 | 1.106 | 0.326 | 0.323  | 0.746 | 0.62  | 1.972 |
| GARS1    | 0.213  | 0.296 | 0.72   | 0.471 | 1.238 | 0.367 | 0.649  | 0.517 | 0.693 | 2.212 |
| GARRE1   | -0.808 | 0.311 | -2.601 | 0.009 | 0.446 | 0.138 | -4.003 | 0     | 0.242 | 0.819 |
| GARNL3   | 0.064  | 0.296 | 0.216  | 0.829 | 1.066 | 0.315 | 0.209  | 0.834 | 0.597 | 1.903 |
| GAREM1   | 0.032  | 0.296 | 0.109  | 0.913 | 1.033 | 0.305 | 0.107  | 0.915 | 0.579 | 1.843 |
| GAR1     | 1.106  | 0.336 | 3.292  | 0.001 | 3.022 | 1.015 | 1.992  | 0.046 | 1.564 | 5.837 |

|            |        |       |        |       |       |       |        |       |       |       |
|------------|--------|-------|--------|-------|-------|-------|--------|-------|-------|-------|
| GAPVD1     | 0.368  | 0.298 | 1.235  | 0.217 | 1.445 | 0.431 | 1.033  | 0.302 | 0.806 | 2.591 |
| GAPDHS     | 0.265  | 0.298 | 0.892  | 0.372 | 1.304 | 0.388 | 0.784  | 0.433 | 0.728 | 2.337 |
| GAPDH      | -0.175 | 0.296 | -0.591 | 0.555 | 0.839 | 0.249 | -0.646 | 0.518 | 0.47  | 1.5   |
| GAP43      | 0.293  | 0.298 | 0.986  | 0.324 | 1.341 | 0.399 | 0.855  | 0.393 | 0.748 | 2.403 |
| GANAB      | -0.43  | 0.3   | -1.432 | 0.152 | 0.651 | 0.195 | -1.789 | 0.074 | 0.362 | 1.171 |
| GAN        | 0.518  | 0.302 | 1.715  | 0.086 | 1.679 | 0.508 | 1.338  | 0.181 | 0.929 | 3.037 |
| GAMT       | -0.074 | 0.297 | -0.25  | 0.803 | 0.928 | 0.276 | -0.259 | 0.795 | 0.519 | 1.662 |
| GALT       | 0.931  | 0.321 | 2.905  | 0.004 | 2.538 | 0.813 | 1.89   | 0.059 | 1.354 | 4.757 |
| GALR3      | -0.056 | 0.297 | -0.189 | 0.85  | 0.945 | 0.281 | -0.194 | 0.846 | 0.528 | 1.693 |
| GALR2      | -0.031 | 0.295 | -0.106 | 0.915 | 0.969 | 0.286 | -0.108 | 0.914 | 0.543 | 1.729 |
| GALR1      | 0.012  | 0.295 | 0.042  | 0.966 | 1.013 | 0.299 | 0.042  | 0.967 | 0.568 | 1.806 |
| GALNT8     | 0.204  | 0.296 | 0.689  | 0.491 | 1.227 | 0.364 | 0.623  | 0.533 | 0.686 | 2.193 |
| GALNT7     | -0.307 | 0.298 | -1.03  | 0.303 | 0.736 | 0.219 | -1.206 | 0.228 | 0.411 | 1.319 |
| GALNT6     | -0.077 | 0.295 | -0.261 | 0.794 | 0.926 | 0.273 | -0.271 | 0.786 | 0.519 | 1.652 |
| GALNT3     | -0.458 | 0.3   | -1.525 | 0.127 | 0.632 | 0.19  | -1.935 | 0.053 | 0.351 | 1.14  |
| GALNT2     | 0.136  | 0.296 | 0.461  | 0.645 | 1.146 | 0.339 | 0.431  | 0.667 | 0.642 | 2.045 |
| GALNT14    | -0.083 | 0.295 | -0.28  | 0.78  | 0.921 | 0.272 | -0.292 | 0.771 | 0.516 | 1.642 |
| GALNT12    | -0.506 | 0.301 | -1.684 | 0.092 | 0.603 | 0.181 | -2.193 | 0.028 | 0.334 | 1.086 |
| GALNT11    | -0.261 | 0.297 | -0.877 | 0.381 | 0.771 | 0.229 | -1.001 | 0.317 | 0.43  | 1.38  |
| GALNT10    | -0.399 | 0.3   | -1.332 | 0.183 | 0.671 | 0.201 | -1.638 | 0.102 | 0.373 | 1.207 |
| GALNT1     | -0.761 | 0.315 | -2.419 | 0.016 | 0.467 | 0.147 | -3.625 | 0     | 0.252 | 0.866 |
| GALNS      | 0.094  | 0.295 | 0.318  | 0.75  | 1.098 | 0.324 | 0.304  | 0.761 | 0.616 | 1.96  |
| GALK2      | -0.385 | 0.3   | -1.286 | 0.199 | 0.68  | 0.204 | -1.569 | 0.117 | 0.378 | 1.224 |
| GALK1      | 0.126  | 0.297 | 0.423  | 0.672 | 1.134 | 0.337 | 0.398  | 0.691 | 0.634 | 2.03  |
| GALE       | -0.226 | 0.298 | -0.759 | 0.448 | 0.798 | 0.238 | -0.851 | 0.395 | 0.445 | 1.43  |
| GALC       | -0.481 | 0.303 | -1.59  | 0.112 | 0.618 | 0.187 | -2.043 | 0.041 | 0.341 | 1.118 |
| GAL3ST4    | -0.188 | 0.296 | -0.634 | 0.526 | 0.829 | 0.246 | -0.697 | 0.486 | 0.464 | 1.481 |
| GAL3ST1    | -0.111 | 0.296 | -0.375 | 0.708 | 0.895 | 0.265 | -0.396 | 0.692 | 0.5   | 1.6   |
| GAL        | -0.084 | 0.295 | -0.283 | 0.777 | 0.92  | 0.272 | -0.296 | 0.768 | 0.515 | 1.641 |
| GAK        | 0.019  | 0.296 | 0.065  | 0.949 | 1.019 | 0.301 | 0.064  | 0.949 | 0.571 | 1.82  |
| GAGE1      | -0.477 | 0.302 | -1.577 | 0.115 | 0.621 | 0.188 | -2.021 | 0.043 | 0.343 | 1.123 |
| GADD45GIP1 | 0.411  | 0.298 | 1.381  | 0.167 | 1.509 | 0.45  | 1.132  | 0.258 | 0.841 | 2.707 |
| GADD45G    | -0.158 | 0.296 | -0.534 | 0.593 | 0.854 | 0.253 | -0.579 | 0.563 | 0.478 | 1.526 |
| GADD45B    | 0.135  | 0.296 | 0.457  | 0.647 | 1.145 | 0.339 | 0.428  | 0.669 | 0.641 | 2.046 |
| GADD45A    | -0.552 | 0.31  | -1.779 | 0.075 | 0.576 | 0.179 | -2.375 | 0.018 | 0.313 | 1.058 |
| GAD2       | 0.022  | 0.295 | 0.074  | 0.941 | 1.022 | 0.302 | 0.073  | 0.942 | 0.573 | 1.824 |
| GAD1       | -0.25  | 0.298 | -0.839 | 0.401 | 0.779 | 0.232 | -0.953 | 0.341 | 0.435 | 1.396 |
| GABRR2     | 0.282  | 0.298 | 0.949  | 0.343 | 1.326 | 0.395 | 0.827  | 0.408 | 0.74  | 2.376 |

|            |        |       |        |       |       |       |        |       |       |       |
|------------|--------|-------|--------|-------|-------|-------|--------|-------|-------|-------|
| GABRR1     | 0.111  | 0.296 | 0.375  | 0.708 | 1.117 | 0.33  | 0.355  | 0.723 | 0.626 | 1.994 |
| GABRQ      | 0.024  | 0.296 | 0.082  | 0.935 | 1.024 | 0.303 | 0.081  | 0.936 | 0.573 | 1.83  |
| GABRP      | -0.212 | 0.296 | -0.715 | 0.474 | 0.809 | 0.239 | -0.797 | 0.426 | 0.453 | 1.445 |
| GABRG3     | 0.298  | 0.298 | 1.001  | 0.317 | 1.348 | 0.401 | 0.866  | 0.387 | 0.752 | 2.416 |
| GABRG2     | -0.184 | 0.297 | -0.62  | 0.535 | 0.832 | 0.247 | -0.681 | 0.496 | 0.465 | 1.488 |
| GABRD      | -0.011 | 0.295 | -0.039 | 0.969 | 0.989 | 0.292 | -0.039 | 0.969 | 0.554 | 1.763 |
| GABRB3     | -0.298 | 0.3   | -0.993 | 0.321 | 0.742 | 0.223 | -1.157 | 0.247 | 0.412 | 1.336 |
| GABRB2     | -0.33  | 0.298 | -1.108 | 0.268 | 0.719 | 0.214 | -1.313 | 0.189 | 0.401 | 1.289 |
| GABRB1     | 0.147  | 0.296 | 0.495  | 0.621 | 1.158 | 0.343 | 0.46   | 0.645 | 0.648 | 2.071 |
| GABRA6     | -0.243 | 0.297 | -0.819 | 0.413 | 0.784 | 0.233 | -0.927 | 0.354 | 0.438 | 1.403 |
| GABRA5     | -0.029 | 0.296 | -0.097 | 0.923 | 0.972 | 0.288 | -0.099 | 0.921 | 0.543 | 1.737 |
| GABRA4     | -0.27  | 0.297 | -0.911 | 0.362 | 0.763 | 0.226 | -1.046 | 0.296 | 0.427 | 1.365 |
| GABRA3     | -0.046 | 0.295 | -0.155 | 0.876 | 0.955 | 0.282 | -0.159 | 0.874 | 0.536 | 1.703 |
| GABRA2     | 0.751  | 0.31  | 2.422  | 0.015 | 2.12  | 0.657 | 1.703  | 0.089 | 1.154 | 3.893 |
| GABRA1     | -0.283 | 0.3   | -0.945 | 0.344 | 0.753 | 0.226 | -1.093 | 0.274 | 0.418 | 1.356 |
| GABPB1-IT1 | -0.058 | 0.295 | -0.197 | 0.843 | 0.943 | 0.279 | -0.203 | 0.839 | 0.529 | 1.683 |
| GABPB1     | -0.343 | 0.303 | -1.131 | 0.258 | 0.709 | 0.215 | -1.35  | 0.177 | 0.391 | 1.286 |
| GABPA      | 0.638  | 0.306 | 2.087  | 0.037 | 1.893 | 0.579 | 1.542  | 0.123 | 1.04  | 3.449 |
| GABBR2     | 0.379  | 0.3   | 1.262  | 0.207 | 1.46  | 0.438 | 1.05   | 0.294 | 0.811 | 2.629 |
| GABBR1     | 0.267  | 0.3   | 0.89   | 0.374 | 1.306 | 0.392 | 0.781  | 0.435 | 0.725 | 2.354 |
| GABARAPL3  | 0.388  | 0.298 | 1.301  | 0.193 | 1.474 | 0.44  | 1.078  | 0.281 | 0.822 | 2.645 |
| GABARAPL2  | 0.186  | 0.295 | 0.631  | 0.528 | 1.205 | 0.356 | 0.575  | 0.565 | 0.675 | 2.149 |
| GABARAPL1  | -0.098 | 0.295 | -0.331 | 0.74  | 0.907 | 0.268 | -0.348 | 0.728 | 0.508 | 1.617 |
| GABARAP    | -0.698 | 0.315 | -2.214 | 0.027 | 0.497 | 0.157 | -3.203 | 0.001 | 0.268 | 0.923 |
| GAB2       | 0.28   | 0.296 | 0.943  | 0.346 | 1.323 | 0.392 | 0.823  | 0.411 | 0.74  | 2.365 |
| GAB1       | -0.278 | 0.298 | -0.934 | 0.35  | 0.757 | 0.226 | -1.077 | 0.281 | 0.422 | 1.357 |
| GAA        | 0.138  | 0.296 | 0.466  | 0.642 | 1.148 | 0.339 | 0.435  | 0.664 | 0.643 | 2.048 |
| G6PD       | 0.366  | 0.298 | 1.23   | 0.219 | 1.442 | 0.429 | 1.03   | 0.303 | 0.805 | 2.584 |
| G6PC3      | 0.273  | 0.297 | 0.92   | 0.358 | 1.314 | 0.39  | 0.805  | 0.421 | 0.735 | 2.349 |
| G6PC2      | 0.219  | 0.299 | 0.733  | 0.463 | 1.245 | 0.372 | 0.659  | 0.51  | 0.693 | 2.234 |
| G6PC       | 0.361  | 0.3   | 1.205  | 0.228 | 1.435 | 0.43  | 1.012  | 0.312 | 0.798 | 2.582 |
| G3BP2      | 0.568  | 0.31  | 1.831  | 0.067 | 1.765 | 0.548 | 1.396  | 0.163 | 0.961 | 3.244 |
| G3BP1      | 0.092  | 0.295 | 0.311  | 0.756 | 1.096 | 0.324 | 0.297  | 0.766 | 0.615 | 1.956 |
| G0S2       | 0.46   | 0.302 | 1.521  | 0.128 | 1.584 | 0.479 | 1.22   | 0.223 | 0.876 | 2.864 |
| FZR1       | 0.337  | 0.298 | 1.132  | 0.258 | 1.4   | 0.417 | 0.961  | 0.337 | 0.782 | 2.509 |
| FZD9       | 0.314  | 0.298 | 1.056  | 0.291 | 1.369 | 0.407 | 0.906  | 0.365 | 0.764 | 2.453 |
| FZD7       | -0.267 | 0.296 | -0.9   | 0.368 | 0.766 | 0.227 | -1.032 | 0.302 | 0.428 | 1.369 |
| FZD6       | 0.228  | 0.298 | 0.764  | 0.445 | 1.256 | 0.374 | 0.684  | 0.494 | 0.7   | 2.252 |

|        |        |       |        |       |       |       |        |       |       |       |
|--------|--------|-------|--------|-------|-------|-------|--------|-------|-------|-------|
| FZD5   | 0.668  | 0.31  | 2.156  | 0.031 | 1.95  | 0.604 | 1.573  | 0.116 | 1.063 | 3.578 |
| FZD4   | -0.119 | 0.297 | -0.4   | 0.689 | 0.888 | 0.264 | -0.425 | 0.671 | 0.496 | 1.589 |
| FZD3   | -0.419 | 0.3   | -1.397 | 0.162 | 0.658 | 0.197 | -1.735 | 0.083 | 0.365 | 1.184 |
| FZD2   | 0.331  | 0.298 | 1.11   | 0.267 | 1.392 | 0.415 | 0.945  | 0.345 | 0.776 | 2.498 |
| FZD10  | -0.029 | 0.295 | -0.1   | 0.92  | 0.971 | 0.287 | -0.101 | 0.919 | 0.544 | 1.732 |
| FZD1   | -0.609 | 0.306 | -1.993 | 0.046 | 0.544 | 0.166 | -2.744 | 0.006 | 0.299 | 0.99  |
| FYN    | -0.331 | 0.298 | -1.112 | 0.266 | 0.718 | 0.214 | -1.318 | 0.187 | 0.401 | 1.287 |
| FYCO1  | -0.311 | 0.298 | -1.045 | 0.296 | 0.732 | 0.218 | -1.226 | 0.22  | 0.409 | 1.313 |
| FYB1   | 0.08   | 0.295 | 0.271  | 0.786 | 1.083 | 0.32  | 0.261  | 0.794 | 0.607 | 1.933 |
| FXYD7  | -0.237 | 0.296 | -0.799 | 0.424 | 0.789 | 0.234 | -0.902 | 0.367 | 0.441 | 1.411 |
| FXYD6  | -0.217 | 0.296 | -0.732 | 0.464 | 0.805 | 0.238 | -0.818 | 0.414 | 0.45  | 1.439 |
| FXYD5  | -0.6   | 0.31  | -1.933 | 0.053 | 0.549 | 0.17  | -2.647 | 0.008 | 0.299 | 1.009 |
| FXYD3  | -0.156 | 0.296 | -0.528 | 0.598 | 0.855 | 0.253 | -0.571 | 0.568 | 0.479 | 1.528 |
| FXYD2  | 0.425  | 0.302 | 1.406  | 0.16  | 1.529 | 0.462 | 1.145  | 0.252 | 0.846 | 2.764 |
| FXYD1  | -0.36  | 0.298 | -1.21  | 0.226 | 0.698 | 0.208 | -1.456 | 0.145 | 0.389 | 1.25  |
| FXR2   | 0.06   | 0.295 | 0.202  | 0.84  | 1.061 | 0.314 | 0.196  | 0.845 | 0.595 | 1.894 |
| FXR1   | 0.502  | 0.302 | 1.659  | 0.097 | 1.652 | 0.5   | 1.304  | 0.192 | 0.913 | 2.988 |
| FXN    | 0.088  | 0.297 | 0.297  | 0.767 | 1.092 | 0.324 | 0.284  | 0.776 | 0.611 | 1.953 |
| FUZ    | -0.366 | 0.303 | -1.208 | 0.227 | 0.693 | 0.21  | -1.459 | 0.145 | 0.383 | 1.256 |
| FUT9   | 0.065  | 0.297 | 0.219  | 0.827 | 1.067 | 0.317 | 0.212  | 0.832 | 0.596 | 1.909 |
| FUT8   | -0.857 | 0.315 | -2.722 | 0.006 | 0.424 | 0.134 | -4.308 | 0     | 0.229 | 0.787 |
| FUT7   | 0.305  | 0.297 | 1.028  | 0.304 | 1.357 | 0.403 | 0.886  | 0.376 | 0.758 | 2.427 |
| FUT6   | -0.385 | 0.299 | -1.286 | 0.199 | 0.681 | 0.204 | -1.568 | 0.117 | 0.379 | 1.223 |
| FUT5   | -0.017 | 0.296 | -0.057 | 0.955 | 0.983 | 0.291 | -0.057 | 0.954 | 0.551 | 1.755 |
| FUT4   | -0.07  | 0.295 | -0.235 | 0.814 | 0.933 | 0.276 | -0.244 | 0.807 | 0.523 | 1.665 |
| FUT3   | -0.056 | 0.295 | -0.189 | 0.85  | 0.946 | 0.279 | -0.194 | 0.846 | 0.53  | 1.687 |
| FUT2   | 0.209  | 0.298 | 0.702  | 0.483 | 1.232 | 0.367 | 0.634  | 0.526 | 0.688 | 2.209 |
| FUT1   | 0.591  | 0.303 | 1.954  | 0.051 | 1.807 | 0.547 | 1.475  | 0.14  | 0.998 | 3.27  |
| FUS    | 0.429  | 0.3   | 1.429  | 0.153 | 1.536 | 0.462 | 1.162  | 0.245 | 0.852 | 2.768 |
| FURIN  | 0.079  | 0.296 | 0.265  | 0.791 | 1.082 | 0.32  | 0.255  | 0.799 | 0.606 | 1.932 |
| FUCA1  | -0.364 | 0.3   | -1.213 | 0.225 | 0.695 | 0.208 | -1.463 | 0.143 | 0.386 | 1.251 |
| FUBP3  | 0.512  | 0.306 | 1.675  | 0.094 | 1.669 | 0.51  | 1.311  | 0.19  | 0.917 | 3.039 |
| FUBP1  | -0.144 | 0.296 | -0.488 | 0.626 | 0.866 | 0.256 | -0.525 | 0.6   | 0.484 | 1.546 |
| FTSJ3  | 0.08   | 0.296 | 0.271  | 0.786 | 1.083 | 0.32  | 0.261  | 0.794 | 0.607 | 1.934 |
| FTSJ1  | 0.049  | 0.296 | 0.167  | 0.867 | 1.051 | 0.311 | 0.163  | 0.871 | 0.588 | 1.876 |
| FTO    | -0.662 | 0.315 | -2.101 | 0.036 | 0.516 | 0.163 | -2.978 | 0.003 | 0.278 | 0.957 |
| FTL    | 0.172  | 0.297 | 0.581  | 0.561 | 1.188 | 0.352 | 0.534  | 0.594 | 0.664 | 2.125 |
| FTH1P5 | -0.186 | 0.3   | -0.62  | 0.535 | 0.83  | 0.249 | -0.682 | 0.496 | 0.461 | 1.494 |



|         |        |       |        |       |       |       |        |       |       |       |
|---------|--------|-------|--------|-------|-------|-------|--------|-------|-------|-------|
| FTH1    | -0.146 | 0.299 | -0.487 | 0.626 | 0.864 | 0.258 | -0.524 | 0.6   | 0.481 | 1.553 |
| FTCD    | -0.213 | 0.296 | -0.719 | 0.472 | 0.809 | 0.239 | -0.801 | 0.423 | 0.453 | 1.443 |
| FSTL4   | -0.028 | 0.295 | -0.094 | 0.925 | 0.973 | 0.287 | -0.095 | 0.924 | 0.545 | 1.735 |
| FSTL3   | -0.211 | 0.296 | -0.712 | 0.477 | 0.81  | 0.24  | -0.792 | 0.428 | 0.453 | 1.447 |
| FSTL1   | -0.934 | 0.315 | -2.96  | 0.003 | 0.393 | 0.124 | -4.896 | 0     | 0.212 | 0.729 |
| FST     | -0.923 | 0.321 | -2.878 | 0.004 | 0.397 | 0.127 | -4.73  | 0     | 0.212 | 0.745 |
| FSHR    | -0.083 | 0.296 | -0.279 | 0.78  | 0.921 | 0.272 | -0.291 | 0.771 | 0.516 | 1.644 |
| FSHB    | 0.238  | 0.297 | 0.802  | 0.423 | 1.269 | 0.377 | 0.713  | 0.476 | 0.709 | 2.272 |
| FSD1    | -0.132 | 0.295 | -0.448 | 0.654 | 0.876 | 0.259 | -0.479 | 0.632 | 0.491 | 1.563 |
| FSCN3   | 0.131  | 0.301 | 0.436  | 0.663 | 1.14  | 0.343 | 0.408  | 0.683 | 0.632 | 2.055 |
| FSCN2   | -0.264 | 0.298 | -0.887 | 0.375 | 0.768 | 0.229 | -1.016 | 0.31  | 0.429 | 1.376 |
| FSCN1   | -0.535 | 0.3   | -1.779 | 0.075 | 0.586 | 0.176 | -2.352 | 0.019 | 0.325 | 1.056 |
| FRZB    | -0.671 | 0.306 | -2.196 | 0.028 | 0.511 | 0.156 | -3.13  | 0.002 | 0.281 | 0.93  |
| FRYL    | -0.547 | 0.303 | -1.809 | 0.07  | 0.579 | 0.175 | -2.408 | 0.016 | 0.32  | 1.047 |
| FRY     | -0.576 | 0.31  | -1.857 | 0.063 | 0.562 | 0.174 | -2.511 | 0.012 | 0.306 | 1.032 |
| FRS3    | 0.303  | 0.298 | 1.015  | 0.31  | 1.354 | 0.404 | 0.876  | 0.381 | 0.754 | 2.43  |
| FRS2    | 0.321  | 0.297 | 1.081  | 0.28  | 1.378 | 0.409 | 0.924  | 0.355 | 0.77  | 2.467 |
| FRRS1L  | -0.02  | 0.296 | -0.067 | 0.946 | 0.98  | 0.29  | -0.068 | 0.946 | 0.549 | 1.752 |
| FRMPD4  | 0.079  | 0.295 | 0.267  | 0.789 | 1.082 | 0.319 | 0.257  | 0.797 | 0.607 | 1.93  |
| FRMPD1  | 0.247  | 0.298 | 0.83   | 0.406 | 1.28  | 0.381 | 0.736  | 0.462 | 0.714 | 2.295 |
| FRMD8   | -0.203 | 0.296 | -0.687 | 0.492 | 0.816 | 0.242 | -0.762 | 0.446 | 0.457 | 1.458 |
| FRMD4B  | -0.706 | 0.306 | -2.307 | 0.021 | 0.494 | 0.151 | -3.352 | 0.001 | 0.271 | 0.899 |
| FRMD4A  | -0.155 | 0.298 | -0.521 | 0.602 | 0.856 | 0.255 | -0.564 | 0.573 | 0.477 | 1.535 |
| FRMD1   | 0.028  | 0.295 | 0.094  | 0.925 | 1.028 | 0.303 | 0.093  | 0.926 | 0.577 | 1.833 |
| FRK     | 0.593  | 0.303 | 1.956  | 0.05  | 1.809 | 0.548 | 1.476  | 0.14  | 0.999 | 3.274 |
| FRAT2   | 0.562  | 0.306 | 1.836  | 0.066 | 1.754 | 0.537 | 1.405  | 0.16  | 0.963 | 3.195 |
| FRAT1   | 0.38   | 0.3   | 1.269  | 0.204 | 1.463 | 0.438 | 1.056  | 0.291 | 0.813 | 2.631 |
| FRAS1   | 0.396  | 0.3   | 1.321  | 0.187 | 1.485 | 0.445 | 1.091  | 0.275 | 0.826 | 2.672 |
| FPR3    | 0.833  | 0.315 | 2.644  | 0.008 | 2.299 | 0.724 | 1.795  | 0.073 | 1.24  | 4.262 |
| FPR2    | 0.144  | 0.295 | 0.488  | 0.626 | 1.155 | 0.341 | 0.454  | 0.65  | 0.647 | 2.06  |
| FPR1    | 0.286  | 0.298 | 0.959  | 0.338 | 1.331 | 0.396 | 0.834  | 0.404 | 0.742 | 2.386 |
| FPGT    | -0.077 | 0.297 | -0.259 | 0.795 | 0.926 | 0.275 | -0.27  | 0.787 | 0.517 | 1.658 |
| FPGS    | -0.169 | 0.296 | -0.572 | 0.567 | 0.844 | 0.25  | -0.623 | 0.533 | 0.472 | 1.508 |
| FOXRED2 | 0.158  | 0.299 | 0.528  | 0.597 | 1.171 | 0.35  | 0.488  | 0.625 | 0.652 | 2.105 |
| FOXP3   | -0.351 | 0.299 | -1.176 | 0.24  | 0.704 | 0.21  | -1.409 | 0.159 | 0.392 | 1.264 |
| FOXO4   | -0.281 | 0.301 | -0.934 | 0.35  | 0.755 | 0.227 | -1.079 | 0.281 | 0.419 | 1.361 |
| FOXO3   | 0.416  | 0.302 | 1.378  | 0.168 | 1.516 | 0.458 | 1.127  | 0.26  | 0.839 | 2.742 |
| FOXO1   | -0.23  | 0.296 | -0.778 | 0.437 | 0.794 | 0.235 | -0.874 | 0.382 | 0.445 | 1.419 |

|           |        |       |        |       |       |       |        |       |       |       |
|-----------|--------|-------|--------|-------|-------|-------|--------|-------|-------|-------|
| FOXN3-AS2 | 0.268  | 0.298 | 0.899  | 0.369 | 1.307 | 0.389 | 0.789  | 0.43  | 0.729 | 2.342 |
| FOXN3     | 0.257  | 0.298 | 0.863  | 0.388 | 1.293 | 0.385 | 0.761  | 0.447 | 0.722 | 2.316 |
| FOXN2     | 0.84   | 0.311 | 2.702  | 0.007 | 2.317 | 0.721 | 1.828  | 0.068 | 1.259 | 4.262 |
| FOXN1     | -0.216 | 0.296 | -0.731 | 0.465 | 0.805 | 0.239 | -0.816 | 0.415 | 0.451 | 1.439 |
| FOXM1     | 0.691  | 0.306 | 2.26   | 0.024 | 1.996 | 0.61  | 1.632  | 0.103 | 1.096 | 3.634 |
| FOXL2     | 0.21   | 0.297 | 0.71   | 0.478 | 1.234 | 0.366 | 0.64   | 0.522 | 0.69  | 2.207 |
| FOXL1     | 0.434  | 0.299 | 1.452  | 0.146 | 1.543 | 0.461 | 1.178  | 0.239 | 0.859 | 2.77  |
| FOXK2     | 0.397  | 0.3   | 1.324  | 0.185 | 1.488 | 0.446 | 1.093  | 0.275 | 0.826 | 2.678 |
| FOXJ3     | 0.263  | 0.296 | 0.887  | 0.375 | 1.3   | 0.385 | 0.78   | 0.435 | 0.728 | 2.323 |
| FOXJ2     | -0.342 | 0.3   | -1.142 | 0.253 | 0.71  | 0.213 | -1.362 | 0.173 | 0.395 | 1.277 |
| FOXJ1     | 0.185  | 0.296 | 0.624  | 0.533 | 1.203 | 0.356 | 0.569  | 0.569 | 0.673 | 2.148 |
| FOXI1     | 0.166  | 0.296 | 0.561  | 0.575 | 1.18  | 0.349 | 0.517  | 0.605 | 0.661 | 2.107 |
| FOXH1     | 0.006  | 0.296 | 0.02   | 0.984 | 1.006 | 0.297 | 0.02   | 0.984 | 0.564 | 1.796 |
| FOXG1     | 0.233  | 0.298 | 0.785  | 0.433 | 1.263 | 0.376 | 0.7    | 0.484 | 0.705 | 2.263 |
| FOXF2     | -0.503 | 0.3   | -1.679 | 0.093 | 0.605 | 0.181 | -2.182 | 0.029 | 0.336 | 1.088 |
| FOXF1     | -0.151 | 0.295 | -0.512 | 0.608 | 0.86  | 0.254 | -0.553 | 0.58  | 0.482 | 1.534 |
| FOXE3     | 0.127  | 0.297 | 0.428  | 0.669 | 1.136 | 0.337 | 0.402  | 0.688 | 0.634 | 2.033 |
| FOXE1     | -0.389 | 0.3   | -1.297 | 0.195 | 0.678 | 0.203 | -1.585 | 0.113 | 0.377 | 1.22  |
| FOXD3     | 0.212  | 0.298 | 0.712  | 0.476 | 1.236 | 0.368 | 0.642  | 0.521 | 0.69  | 2.216 |
| FOXD2     | 0.233  | 0.297 | 0.786  | 0.432 | 1.263 | 0.375 | 0.701  | 0.483 | 0.706 | 2.261 |
| FOXD1     | -0.087 | 0.295 | -0.296 | 0.767 | 0.916 | 0.271 | -0.309 | 0.757 | 0.514 | 1.634 |
| FOXC2     | 0      | 0.296 | -0.001 | 0.999 | 1     | 0.296 | -0.001 | 0.999 | 0.559 | 1.787 |
| FOXC1     | -0.384 | 0.298 | -1.288 | 0.198 | 0.681 | 0.203 | -1.57  | 0.116 | 0.38  | 1.222 |
| FOXB1     | -0.144 | 0.298 | -0.485 | 0.628 | 0.866 | 0.258 | -0.522 | 0.602 | 0.483 | 1.552 |
| FOXA2     | 0.282  | 0.297 | 0.948  | 0.343 | 1.326 | 0.394 | 0.826  | 0.409 | 0.74  | 2.375 |
| FOXA1     | 0.009  | 0.295 | 0.029  | 0.977 | 1.009 | 0.298 | 0.029  | 0.977 | 0.565 | 1.799 |
| FOSL2     | -0.11  | 0.296 | -0.372 | 0.71  | 0.896 | 0.265 | -0.393 | 0.694 | 0.501 | 1.6   |
| FOSL1     | 0.317  | 0.297 | 1.068  | 0.285 | 1.373 | 0.408 | 0.915  | 0.36  | 0.767 | 2.458 |
| FOSB      | -0.28  | 0.3   | -0.933 | 0.351 | 0.756 | 0.227 | -1.076 | 0.282 | 0.42  | 1.361 |
| FOS       | -0.224 | 0.298 | -0.753 | 0.451 | 0.799 | 0.238 | -0.844 | 0.399 | 0.445 | 1.433 |
| FOLR3     | -0.346 | 0.298 | -1.163 | 0.245 | 0.707 | 0.211 | -1.39  | 0.165 | 0.394 | 1.268 |
| FOLR2     | -0.423 | 0.299 | -1.416 | 0.157 | 0.655 | 0.196 | -1.763 | 0.078 | 0.365 | 1.177 |
| FOLR1     | 0.189  | 0.298 | 0.635  | 0.525 | 1.209 | 0.36  | 0.579  | 0.563 | 0.674 | 2.168 |
| FOLH1B    | 0.266  | 0.298 | 0.895  | 0.371 | 1.305 | 0.388 | 0.785  | 0.432 | 0.728 | 2.338 |
| FOLH1     | 0.17   | 0.296 | 0.574  | 0.566 | 1.185 | 0.351 | 0.528  | 0.598 | 0.663 | 2.118 |
| FOCAD     | 0.286  | 0.296 | 0.965  | 0.335 | 1.331 | 0.395 | 0.839  | 0.401 | 0.745 | 2.38  |
| FNTA      | -0.023 | 0.297 | -0.076 | 0.939 | 0.978 | 0.29  | -0.077 | 0.939 | 0.547 | 1.749 |
| FNDC8     | 0.633  | 0.303 | 2.09   | 0.037 | 1.884 | 0.571 | 1.548  | 0.122 | 1.04  | 3.412 |

|          |        |       |        |       |       |       |        |       |       |       |
|----------|--------|-------|--------|-------|-------|-------|--------|-------|-------|-------|
| FNDC4    | -0.014 | 0.295 | -0.048 | 0.962 | 0.986 | 0.291 | -0.048 | 0.961 | 0.553 | 1.758 |
| FNDC3B   | 0.071  | 0.295 | 0.24   | 0.811 | 1.073 | 0.317 | 0.231  | 0.817 | 0.602 | 1.915 |
| FNDC3A   | -0.696 | 0.306 | -2.277 | 0.023 | 0.498 | 0.152 | -3.291 | 0.001 | 0.274 | 0.907 |
| FNDC11   | -0.148 | 0.296 | -0.499 | 0.618 | 0.863 | 0.255 | -0.538 | 0.591 | 0.483 | 1.54  |
| FNBP4    | 0.131  | 0.297 | 0.442  | 0.659 | 1.14  | 0.338 | 0.414  | 0.679 | 0.637 | 2.039 |
| FNBP1L   | 0.272  | 0.298 | 0.913  | 0.361 | 1.312 | 0.391 | 0.799  | 0.424 | 0.732 | 2.351 |
| FNBP1    | -0.482 | 0.3   | -1.608 | 0.108 | 0.617 | 0.185 | -2.066 | 0.039 | 0.343 | 1.111 |
| FN3KRP   | 0.408  | 0.3   | 1.362  | 0.173 | 1.504 | 0.451 | 1.119  | 0.263 | 0.836 | 2.707 |
| FN3K     | 0.003  | 0.295 | 0.009  | 0.993 | 1.003 | 0.296 | 0.009  | 0.993 | 0.562 | 1.789 |
| FN1      | -0.145 | 0.295 | -0.49  | 0.624 | 0.865 | 0.256 | -0.528 | 0.598 | 0.485 | 1.543 |
| FMR1     | -0.085 | 0.297 | -0.286 | 0.775 | 0.919 | 0.272 | -0.298 | 0.766 | 0.514 | 1.643 |
| FMOD     | -0.5   | 0.3   | -1.667 | 0.095 | 0.607 | 0.182 | -2.163 | 0.031 | 0.337 | 1.092 |
| FMO6P    | 0.06   | 0.295 | 0.205  | 0.838 | 1.062 | 0.314 | 0.199  | 0.842 | 0.596 | 1.894 |
| FMO5     | -0.459 | 0.302 | -1.519 | 0.129 | 0.632 | 0.191 | -1.928 | 0.054 | 0.349 | 1.143 |
| FMO4     | 0.168  | 0.296 | 0.566  | 0.571 | 1.183 | 0.351 | 0.521  | 0.602 | 0.662 | 2.114 |
| FMO3     | -0.506 | 0.302 | -1.675 | 0.094 | 0.603 | 0.182 | -2.181 | 0.029 | 0.333 | 1.09  |
| FMO2     | 0.285  | 0.298 | 0.959  | 0.338 | 1.33  | 0.396 | 0.834  | 0.404 | 0.742 | 2.384 |
| FMO1     | -0.087 | 0.296 | -0.293 | 0.77  | 0.917 | 0.271 | -0.306 | 0.76  | 0.514 | 1.637 |
| FMNL1    | -0.373 | 0.3   | -1.246 | 0.213 | 0.688 | 0.206 | -1.51  | 0.131 | 0.383 | 1.239 |
| FLVCR2   | 0.09   | 0.295 | 0.305  | 0.76  | 1.094 | 0.323 | 0.292  | 0.77  | 0.613 | 1.953 |
| FLT4     | -0.22  | 0.298 | -0.74  | 0.459 | 0.802 | 0.239 | -0.828 | 0.408 | 0.447 | 1.438 |
| FLT3LG   | -0.341 | 0.298 | -1.147 | 0.252 | 0.711 | 0.212 | -1.366 | 0.172 | 0.397 | 1.274 |
| FLT3     | -0.474 | 0.302 | -1.567 | 0.117 | 0.622 | 0.188 | -2.005 | 0.045 | 0.344 | 1.126 |
| FLT1     | -0.044 | 0.295 | -0.148 | 0.882 | 0.957 | 0.283 | -0.152 | 0.879 | 0.537 | 1.707 |
| FLRT3    | 0.027  | 0.295 | 0.092  | 0.927 | 1.027 | 0.303 | 0.09   | 0.928 | 0.576 | 1.833 |
| FLRT1    | -0.054 | 0.295 | -0.184 | 0.854 | 0.947 | 0.28  | -0.189 | 0.85  | 0.531 | 1.689 |
| FLOT2    | -0.396 | 0.3   | -1.32  | 0.187 | 0.673 | 0.202 | -1.619 | 0.105 | 0.374 | 1.211 |
| FLOT1    | -0.04  | 0.296 | -0.135 | 0.892 | 0.961 | 0.284 | -0.138 | 0.89  | 0.538 | 1.715 |
| FLNC     | 0.44   | 0.303 | 1.452  | 0.146 | 1.552 | 0.47  | 1.175  | 0.24  | 0.858 | 2.81  |
| FLNB     | -0.733 | 0.31  | -2.367 | 0.018 | 0.48  | 0.149 | -3.492 | 0     | 0.262 | 0.882 |
| FLNA     | 0.03   | 0.296 | 0.103  | 0.918 | 1.031 | 0.305 | 0.102  | 0.919 | 0.577 | 1.841 |
| FLJ42627 | 0.427  | 0.307 | 1.392  | 0.164 | 1.533 | 0.47  | 1.133  | 0.257 | 0.84  | 2.797 |
| FLJ20712 | -0.024 | 0.295 | -0.08  | 0.936 | 0.977 | 0.288 | -0.081 | 0.935 | 0.547 | 1.742 |
| FLJ13224 | 0.063  | 0.297 | 0.21   | 0.833 | 1.065 | 0.316 | 0.204  | 0.838 | 0.595 | 1.906 |
| FLII     | 0.03   | 0.295 | 0.1    | 0.92  | 1.03  | 0.304 | 0.099  | 0.921 | 0.577 | 1.838 |
| FLI1     | -0.907 | 0.313 | -2.898 | 0.004 | 0.404 | 0.126 | -4.717 | 0     | 0.219 | 0.746 |
| FLG      | 0.517  | 0.303 | 1.71   | 0.087 | 1.677 | 0.507 | 1.335  | 0.182 | 0.927 | 3.035 |
| FLCN     | 0.151  | 0.3   | 0.503  | 0.615 | 1.163 | 0.349 | 0.467  | 0.641 | 0.646 | 2.093 |

|         |        |       |        |       |       |       |        |       |       |       |
|---------|--------|-------|--------|-------|-------|-------|--------|-------|-------|-------|
| FLAD1   | 0.066  | 0.295 | 0.225  | 0.822 | 1.069 | 0.315 | 0.217  | 0.828 | 0.599 | 1.905 |
| FKTN    | 0.082  | 0.295 | 0.278  | 0.781 | 1.086 | 0.32  | 0.267  | 0.79  | 0.609 | 1.936 |
| FKSG49  | 0.638  | 0.31  | 2.058  | 0.04  | 1.892 | 0.586 | 1.522  | 0.128 | 1.031 | 3.472 |
| FKRP    | -0.092 | 0.296 | -0.311 | 0.756 | 0.912 | 0.27  | -0.326 | 0.744 | 0.511 | 1.628 |
| FKBPL   | 0.879  | 0.315 | 2.793  | 0.005 | 2.408 | 0.758 | 1.858  | 0.063 | 1.3   | 4.462 |
| FKBP9   | -0.488 | 0.3   | -1.629 | 0.103 | 0.614 | 0.184 | -2.1   | 0.036 | 0.341 | 1.104 |
| FKBP8   | -0.009 | 0.295 | -0.029 | 0.977 | 0.991 | 0.293 | -0.03  | 0.976 | 0.556 | 1.769 |
| FKBP6   | 0.046  | 0.295 | 0.155  | 0.876 | 1.047 | 0.309 | 0.152  | 0.879 | 0.587 | 1.868 |
| FKBP5   | -0.751 | 0.315 | -2.385 | 0.017 | 0.472 | 0.149 | -3.554 | 0     | 0.255 | 0.875 |
| FKBP4   | -0.018 | 0.296 | -0.061 | 0.951 | 0.982 | 0.29  | -0.062 | 0.951 | 0.55  | 1.753 |
| FKBP3   | 0.84   | 0.31  | 2.708  | 0.007 | 2.317 | 0.719 | 1.832  | 0.067 | 1.261 | 4.255 |
| FKBP2   | -0.282 | 0.301 | -0.937 | 0.349 | 0.754 | 0.227 | -1.083 | 0.279 | 0.418 | 1.361 |
| FKBP1B  | 0.076  | 0.296 | 0.258  | 0.796 | 1.079 | 0.319 | 0.248  | 0.804 | 0.604 | 1.927 |
| FKBP1A  | -0.26  | 0.297 | -0.875 | 0.382 | 0.771 | 0.229 | -0.999 | 0.318 | 0.43  | 1.381 |
| FKBP15  | -0.531 | 0.302 | -1.757 | 0.079 | 0.588 | 0.178 | -2.319 | 0.02  | 0.325 | 1.063 |
| FKBP14  | -0.399 | 0.3   | -1.331 | 0.183 | 0.671 | 0.201 | -1.635 | 0.102 | 0.373 | 1.208 |
| FKBP11  | -0.622 | 0.306 | -2.036 | 0.042 | 0.537 | 0.164 | -2.824 | 0.005 | 0.295 | 0.977 |
| FKBP10  | 0.461  | 0.3   | 1.537  | 0.124 | 1.585 | 0.475 | 1.232  | 0.218 | 0.881 | 2.853 |
| FJX1    | 0.348  | 0.298 | 1.17   | 0.242 | 1.417 | 0.422 | 0.988  | 0.323 | 0.791 | 2.539 |
| FIS1    | -0.187 | 0.299 | -0.626 | 0.531 | 0.829 | 0.248 | -0.688 | 0.491 | 0.462 | 1.49  |
| FIP1L1  | 0.484  | 0.301 | 1.609  | 0.108 | 1.623 | 0.488 | 1.276  | 0.202 | 0.9   | 2.926 |
| FILIP1L | -0.959 | 0.316 | -3.034 | 0.002 | 0.383 | 0.121 | -5.092 | 0     | 0.206 | 0.712 |
| FIG4    | 0.188  | 0.297 | 0.634  | 0.526 | 1.207 | 0.359 | 0.578  | 0.564 | 0.674 | 2.161 |
| FICD    | 0.225  | 0.302 | 0.745  | 0.457 | 1.252 | 0.378 | 0.667  | 0.505 | 0.693 | 2.262 |
| FIBP    | 0.354  | 0.297 | 1.189  | 0.234 | 1.424 | 0.424 | 1.002  | 0.316 | 0.795 | 2.551 |
| FHOD3   | -0.632 | 0.306 | -2.064 | 0.039 | 0.532 | 0.163 | -2.878 | 0.004 | 0.292 | 0.969 |
| FHOD1   | -0.193 | 0.298 | -0.649 | 0.516 | 0.824 | 0.245 | -0.716 | 0.474 | 0.46  | 1.477 |
| FHL5    | -0.592 | 0.306 | -1.937 | 0.053 | 0.553 | 0.169 | -2.643 | 0.008 | 0.304 | 1.007 |
| FHL3    | -0.194 | 0.299 | -0.65  | 0.516 | 0.824 | 0.246 | -0.717 | 0.473 | 0.459 | 1.479 |
| FHL2    | -0.238 | 0.298 | -0.801 | 0.423 | 0.788 | 0.235 | -0.905 | 0.366 | 0.44  | 1.412 |
| FHL1    | -0.167 | 0.295 | -0.564 | 0.573 | 0.847 | 0.25  | -0.613 | 0.54  | 0.474 | 1.511 |
| FHIT    | -0.025 | 0.295 | -0.086 | 0.932 | 0.975 | 0.288 | -0.087 | 0.931 | 0.546 | 1.74  |
| FH      | -0.242 | 0.298 | -0.815 | 0.415 | 0.785 | 0.233 | -0.922 | 0.356 | 0.438 | 1.406 |
| FGR     | -0.445 | 0.3   | -1.483 | 0.138 | 0.641 | 0.192 | -1.868 | 0.062 | 0.356 | 1.154 |
| FGL2    | -0.652 | 0.306 | -2.131 | 0.033 | 0.521 | 0.159 | -3.005 | 0.003 | 0.286 | 0.949 |
| FGL1    | 0.339  | 0.3   | 1.132  | 0.258 | 1.404 | 0.42  | 0.96   | 0.337 | 0.78  | 2.525 |
| FGGY    | -0.386 | 0.302 | -1.278 | 0.201 | 0.68  | 0.205 | -1.56  | 0.119 | 0.376 | 1.229 |
| FGG     | 0.275  | 0.296 | 0.929  | 0.353 | 1.317 | 0.39  | 0.812  | 0.417 | 0.737 | 2.353 |

|        |        |       |        |       |       |       |        |       |       |       |
|--------|--------|-------|--------|-------|-------|-------|--------|-------|-------|-------|
| FGFR4  | 0.389  | 0.303 | 1.286  | 0.198 | 1.476 | 0.447 | 1.066  | 0.287 | 0.816 | 2.671 |
| FGFR3  | 0.134  | 0.296 | 0.452  | 0.651 | 1.143 | 0.338 | 0.423  | 0.672 | 0.64  | 2.042 |
| FGFR2  | -0.107 | 0.295 | -0.364 | 0.716 | 0.898 | 0.265 | -0.384 | 0.701 | 0.503 | 1.602 |
| FGFR1  | -0.344 | 0.298 | -1.157 | 0.247 | 0.709 | 0.211 | -1.381 | 0.167 | 0.395 | 1.27  |
| FGFBP1 | -0.136 | 0.297 | -0.457 | 0.648 | 0.873 | 0.259 | -0.49  | 0.624 | 0.488 | 1.563 |
| FGF9   | -0.128 | 0.295 | -0.432 | 0.666 | 0.88  | 0.26  | -0.461 | 0.645 | 0.493 | 1.571 |
| FGF8   | 0.222  | 0.296 | 0.748  | 0.455 | 1.248 | 0.37  | 0.671  | 0.502 | 0.698 | 2.23  |
| FGF7   | -0.545 | 0.303 | -1.8   | 0.072 | 0.58  | 0.176 | -2.393 | 0.017 | 0.32  | 1.05  |
| FGF6   | 0.496  | 0.3   | 1.65   | 0.099 | 1.641 | 0.493 | 1.301  | 0.193 | 0.911 | 2.957 |
| FGF5   | 0.046  | 0.298 | 0.155  | 0.877 | 1.047 | 0.313 | 0.151  | 0.88  | 0.583 | 1.88  |
| FGF4   | -0.111 | 0.297 | -0.374 | 0.708 | 0.895 | 0.266 | -0.396 | 0.692 | 0.5   | 1.602 |
| FGF3   | 0.108  | 0.296 | 0.364  | 0.716 | 1.114 | 0.33  | 0.345  | 0.73  | 0.623 | 1.99  |
| FGF23  | 0.416  | 0.3   | 1.39   | 0.165 | 1.517 | 0.454 | 1.137  | 0.256 | 0.843 | 2.729 |
| FGF22  | -0.305 | 0.298 | -1.025 | 0.305 | 0.737 | 0.219 | -1.199 | 0.231 | 0.411 | 1.321 |
| FGF21  | 0.101  | 0.296 | 0.343  | 0.732 | 1.107 | 0.327 | 0.326  | 0.744 | 0.62  | 1.976 |
| FGF20  | 0.41   | 0.299 | 1.374  | 0.17  | 1.507 | 0.45  | 1.127  | 0.26  | 0.839 | 2.705 |
| FGF2   | -0.268 | 0.297 | -0.901 | 0.367 | 0.765 | 0.227 | -1.034 | 0.301 | 0.428 | 1.369 |
| FGF18  | 0.255  | 0.298 | 0.855  | 0.392 | 1.291 | 0.385 | 0.755  | 0.45  | 0.719 | 2.316 |
| FGF17  | 0.064  | 0.297 | 0.214  | 0.831 | 1.066 | 0.317 | 0.207  | 0.836 | 0.595 | 1.909 |
| FGF16  | 0.211  | 0.296 | 0.712  | 0.476 | 1.235 | 0.366 | 0.642  | 0.521 | 0.691 | 2.206 |
| FGF14  | -0.49  | 0.302 | -1.62  | 0.105 | 0.613 | 0.185 | -2.09  | 0.037 | 0.339 | 1.108 |
| FGF13  | 0.262  | 0.298 | 0.877  | 0.38  | 1.299 | 0.388 | 0.772  | 0.44  | 0.724 | 2.332 |
| FGF12  | 0.135  | 0.295 | 0.456  | 0.648 | 1.144 | 0.338 | 0.427  | 0.669 | 0.641 | 2.041 |
| FGF1   | -0.124 | 0.296 | -0.42  | 0.674 | 0.883 | 0.261 | -0.448 | 0.654 | 0.494 | 1.577 |
| FGD6   | -0.228 | 0.296 | -0.768 | 0.442 | 0.796 | 0.236 | -0.863 | 0.388 | 0.446 | 1.423 |
| FGD2   | 0.416  | 0.3   | 1.387  | 0.166 | 1.515 | 0.454 | 1.135  | 0.257 | 0.842 | 2.726 |
| FGD1   | 0.518  | 0.302 | 1.713  | 0.087 | 1.678 | 0.507 | 1.337  | 0.181 | 0.928 | 3.035 |
| FGB    | 0.208  | 0.297 | 0.7    | 0.484 | 1.231 | 0.365 | 0.632  | 0.527 | 0.688 | 2.202 |
| FGA    | 0.411  | 0.3   | 1.37   | 0.171 | 1.509 | 0.453 | 1.123  | 0.261 | 0.838 | 2.717 |
| FFAR2  | 0.098  | 0.295 | 0.331  | 0.741 | 1.103 | 0.325 | 0.315  | 0.753 | 0.618 | 1.966 |
| FEZF2  | 0.085  | 0.295 | 0.288  | 0.774 | 1.089 | 0.321 | 0.276  | 0.783 | 0.61  | 1.942 |
| FEZ2   | -0.587 | 0.306 | -1.92  | 0.055 | 0.556 | 0.17  | -2.611 | 0.009 | 0.306 | 1.012 |
| FEZ1   | -0.508 | 0.303 | -1.681 | 0.093 | 0.601 | 0.182 | -2.19  | 0.028 | 0.332 | 1.088 |
| FEV    | 0.211  | 0.296 | 0.713  | 0.476 | 1.235 | 0.366 | 0.642  | 0.521 | 0.691 | 2.207 |
| FETUB  | 0.164  | 0.295 | 0.556  | 0.578 | 1.179 | 0.348 | 0.513  | 0.608 | 0.66  | 2.103 |
| FES    | 0.016  | 0.297 | 0.055  | 0.956 | 1.017 | 0.302 | 0.055  | 0.956 | 0.568 | 1.819 |
| FERMT2 | 0.032  | 0.295 | 0.107  | 0.915 | 1.032 | 0.305 | 0.105  | 0.916 | 0.578 | 1.842 |
| FERMT1 | -0.011 | 0.295 | -0.038 | 0.97  | 0.989 | 0.292 | -0.038 | 0.97  | 0.555 | 1.763 |

|         |        |       |        |       |       |       |        |       |       |       |
|---------|--------|-------|--------|-------|-------|-------|--------|-------|-------|-------|
| FER1L4  | 0.107  | 0.297 | 0.36   | 0.719 | 1.113 | 0.331 | 0.342  | 0.733 | 0.621 | 1.994 |
| FER     | 0.29   | 0.297 | 0.978  | 0.328 | 1.336 | 0.396 | 0.849  | 0.396 | 0.747 | 2.39  |
| FEN1    | 0.291  | 0.298 | 0.975  | 0.329 | 1.337 | 0.399 | 0.846  | 0.397 | 0.746 | 2.399 |
| FEM1C   | -0.141 | 0.296 | -0.476 | 0.634 | 0.869 | 0.257 | -0.511 | 0.609 | 0.487 | 1.551 |
| FEM1B   | -0.001 | 0.295 | -0.004 | 0.997 | 0.999 | 0.295 | -0.004 | 0.997 | 0.56  | 1.781 |
| FECH    | 0.328  | 0.296 | 1.107  | 0.268 | 1.388 | 0.411 | 0.944  | 0.345 | 0.777 | 2.482 |
| FDXR    | 0.316  | 0.297 | 1.062  | 0.288 | 1.371 | 0.408 | 0.911  | 0.362 | 0.766 | 2.456 |
| FDX1    | -0.564 | 0.306 | -1.842 | 0.065 | 0.569 | 0.174 | -2.474 | 0.013 | 0.312 | 1.037 |
| FDPS    | 0.41   | 0.298 | 1.376  | 0.169 | 1.508 | 0.45  | 1.129  | 0.259 | 0.84  | 2.705 |
| FDFT1   | 0.248  | 0.296 | 0.838  | 0.402 | 1.282 | 0.38  | 0.742  | 0.458 | 0.717 | 2.29  |
| FCRL2   | -0.592 | 0.303 | -1.955 | 0.051 | 0.553 | 0.168 | -2.668 | 0.008 | 0.305 | 1.001 |
| FCN3    | 0.104  | 0.296 | 0.35   | 0.726 | 1.109 | 0.328 | 0.333  | 0.739 | 0.621 | 1.981 |
| FCN2    | -0.177 | 0.297 | -0.597 | 0.55  | 0.838 | 0.248 | -0.653 | 0.514 | 0.468 | 1.498 |
| FCN1    | -0.189 | 0.296 | -0.638 | 0.523 | 0.828 | 0.245 | -0.703 | 0.482 | 0.463 | 1.479 |
| FCMR    | -0.155 | 0.297 | -0.521 | 0.602 | 0.857 | 0.254 | -0.563 | 0.573 | 0.479 | 1.533 |
| FCHSD2  | -0.361 | 0.3   | -1.204 | 0.229 | 0.697 | 0.209 | -1.45  | 0.147 | 0.387 | 1.254 |
| FCHO1   | -0.386 | 0.298 | -1.296 | 0.195 | 0.68  | 0.202 | -1.581 | 0.114 | 0.379 | 1.219 |
| FCGRT   | -0.009 | 0.296 | -0.029 | 0.977 | 0.991 | 0.293 | -0.029 | 0.977 | 0.555 | 1.77  |
| FCGR3B  | 0.044  | 0.295 | 0.149  | 0.881 | 1.045 | 0.308 | 0.146  | 0.884 | 0.586 | 1.863 |
| FCGR2C  | -0.369 | 0.3   | -1.231 | 0.218 | 0.691 | 0.207 | -1.489 | 0.137 | 0.384 | 1.244 |
| FCGR2B  | -0.214 | 0.298 | -0.72  | 0.471 | 0.807 | 0.24  | -0.803 | 0.422 | 0.45  | 1.446 |
| FCGR2A  | -0.269 | 0.3   | -0.898 | 0.369 | 0.764 | 0.229 | -1.031 | 0.303 | 0.424 | 1.375 |
| FCGR1B  | 0.024  | 0.296 | 0.08   | 0.936 | 1.024 | 0.303 | 0.079  | 0.937 | 0.574 | 1.828 |
| FCGR1A  | -0.177 | 0.298 | -0.594 | 0.552 | 0.838 | 0.25  | -0.65  | 0.515 | 0.467 | 1.502 |
| FCGBP   | -0.49  | 0.306 | -1.601 | 0.109 | 0.613 | 0.187 | -2.066 | 0.039 | 0.336 | 1.116 |
| FCF1    | -0.013 | 0.297 | -0.043 | 0.966 | 0.987 | 0.293 | -0.043 | 0.966 | 0.552 | 1.767 |
| FCER2   | 0.165  | 0.296 | 0.556  | 0.578 | 1.179 | 0.349 | 0.512  | 0.608 | 0.66  | 2.107 |
| FCER1G  | -0.065 | 0.295 | -0.221 | 0.825 | 0.937 | 0.277 | -0.229 | 0.819 | 0.525 | 1.671 |
| FCER1A  | -0.593 | 0.306 | -1.94  | 0.052 | 0.552 | 0.169 | -2.649 | 0.008 | 0.303 | 1.006 |
| FCAR    | 0.124  | 0.295 | 0.419  | 0.675 | 1.132 | 0.334 | 0.394  | 0.693 | 0.634 | 2.019 |
| FBXW7   | -0.108 | 0.295 | -0.364 | 0.716 | 0.898 | 0.265 | -0.385 | 0.701 | 0.504 | 1.602 |
| FBXW4P1 | 0.537  | 0.306 | 1.756  | 0.079 | 1.711 | 0.523 | 1.358  | 0.174 | 0.939 | 3.117 |
| FBXW4   | -0.56  | 0.306 | -1.834 | 0.067 | 0.571 | 0.174 | -2.459 | 0.014 | 0.314 | 1.039 |
| FBXW2   | -0.668 | 0.31  | -2.156 | 0.031 | 0.513 | 0.159 | -3.068 | 0.002 | 0.279 | 0.941 |
| FBXW12  | 0.401  | 0.302 | 1.326  | 0.185 | 1.493 | 0.451 | 1.093  | 0.275 | 0.826 | 2.701 |
| FBXW11  | 0.317  | 0.298 | 1.066  | 0.287 | 1.374 | 0.409 | 0.913  | 0.361 | 0.766 | 2.463 |
| FBXO9   | 0.031  | 0.297 | 0.104  | 0.917 | 1.031 | 0.306 | 0.102  | 0.919 | 0.576 | 1.845 |
| FBXO7   | -0.199 | 0.297 | -0.671 | 0.503 | 0.819 | 0.243 | -0.742 | 0.458 | 0.458 | 1.466 |

|        |        |       |        |       |       |       |        |       |       |       |
|--------|--------|-------|--------|-------|-------|-------|--------|-------|-------|-------|
| FBXO5  | 0.66   | 0.306 | 2.158  | 0.031 | 1.934 | 0.591 | 1.58   | 0.114 | 1.062 | 3.521 |
| FBXO46 | 0.613  | 0.311 | 1.974  | 0.048 | 1.846 | 0.573 | 1.476  | 0.14  | 1.004 | 3.394 |
| FBXO42 | -0.191 | 0.296 | -0.646 | 0.518 | 0.826 | 0.245 | -0.712 | 0.477 | 0.462 | 1.476 |
| FBXO41 | 0.501  | 0.302 | 1.658  | 0.097 | 1.651 | 0.499 | 1.304  | 0.192 | 0.913 | 2.986 |
| FBXO40 | 0.382  | 0.3   | 1.273  | 0.203 | 1.465 | 0.439 | 1.059  | 0.29  | 0.814 | 2.636 |
| FBXO4  | 0.03   | 0.296 | 0.102  | 0.919 | 1.031 | 0.305 | 0.1    | 0.92  | 0.577 | 1.84  |
| FBXO38 | 0.229  | 0.296 | 0.776  | 0.438 | 1.258 | 0.372 | 0.693  | 0.488 | 0.705 | 2.245 |
| FBXO34 | -0.064 | 0.296 | -0.218 | 0.828 | 0.938 | 0.277 | -0.225 | 0.822 | 0.525 | 1.675 |
| FBXO31 | 0.445  | 0.3   | 1.487  | 0.137 | 1.561 | 0.468 | 1.2    | 0.23  | 0.868 | 2.808 |
| FBXO3  | -0.044 | 0.296 | -0.15  | 0.881 | 0.957 | 0.283 | -0.154 | 0.878 | 0.536 | 1.707 |
| FBXO28 | -0.405 | 0.3   | -1.354 | 0.176 | 0.667 | 0.2   | -1.669 | 0.095 | 0.371 | 1.199 |
| FBXO24 | 0.473  | 0.3   | 1.574  | 0.116 | 1.605 | 0.482 | 1.254  | 0.21  | 0.89  | 2.891 |
| FBXO22 | 0.425  | 0.3   | 1.419  | 0.156 | 1.53  | 0.458 | 1.156  | 0.248 | 0.85  | 2.752 |
| FBXO21 | -0.171 | 0.296 | -0.577 | 0.564 | 0.843 | 0.25  | -0.629 | 0.529 | 0.471 | 1.507 |
| FBXO2  | -0.047 | 0.297 | -0.157 | 0.875 | 0.954 | 0.283 | -0.161 | 0.872 | 0.534 | 1.707 |
| FBXO17 | 0.043  | 0.296 | 0.145  | 0.885 | 1.044 | 0.309 | 0.142  | 0.887 | 0.585 | 1.863 |
| FBXO11 | -0.355 | 0.299 | -1.19  | 0.234 | 0.701 | 0.209 | -1.429 | 0.153 | 0.39  | 1.259 |
| FBXL8  | -0.189 | 0.298 | -0.635 | 0.525 | 0.828 | 0.247 | -0.699 | 0.485 | 0.461 | 1.484 |
| FBXL7  | -0.233 | 0.298 | -0.783 | 0.434 | 0.792 | 0.236 | -0.882 | 0.378 | 0.442 | 1.42  |
| FBXL6  | 0.365  | 0.3   | 1.218  | 0.223 | 1.441 | 0.432 | 1.02   | 0.308 | 0.801 | 2.593 |
| FBXL5  | -0.488 | 0.306 | -1.594 | 0.111 | 0.614 | 0.188 | -2.054 | 0.04  | 0.337 | 1.118 |
| FBXL4  | 0.658  | 0.306 | 2.154  | 0.031 | 1.932 | 0.59  | 1.578  | 0.115 | 1.061 | 3.517 |
| FBXL2  | 0.116  | 0.296 | 0.391  | 0.696 | 1.123 | 0.333 | 0.369  | 0.712 | 0.628 | 2.007 |
| FBXL18 | -0.529 | 0.3   | -1.764 | 0.078 | 0.589 | 0.177 | -2.325 | 0.02  | 0.327 | 1.061 |
| FBXL15 | -0.218 | 0.298 | -0.731 | 0.465 | 0.805 | 0.24  | -0.816 | 0.414 | 0.449 | 1.442 |
| FBXL14 | -0.216 | 0.298 | -0.723 | 0.47  | 0.806 | 0.241 | -0.807 | 0.42  | 0.449 | 1.446 |
| FBXL12 | 0.084  | 0.296 | 0.283  | 0.777 | 1.087 | 0.322 | 0.271  | 0.786 | 0.608 | 1.944 |
| FBRS   | 0.146  | 0.295 | 0.496  | 0.62  | 1.158 | 0.342 | 0.461  | 0.645 | 0.649 | 2.066 |
| FBP2   | -0.338 | 0.299 | -1.129 | 0.259 | 0.714 | 0.213 | -1.343 | 0.179 | 0.397 | 1.282 |
| FBP1   | -0.09  | 0.297 | -0.304 | 0.761 | 0.914 | 0.271 | -0.318 | 0.75  | 0.511 | 1.634 |
| FBN2   | -0.426 | 0.298 | -1.426 | 0.154 | 0.653 | 0.195 | -1.777 | 0.076 | 0.364 | 1.173 |
| FBN1   | -0.453 | 0.3   | -1.511 | 0.131 | 0.636 | 0.191 | -1.911 | 0.056 | 0.353 | 1.144 |
| FBLN5  | -0.743 | 0.307 | -2.422 | 0.015 | 0.476 | 0.146 | -3.593 | 0     | 0.261 | 0.868 |
| FBLN2  | -0.686 | 0.31  | -2.214 | 0.027 | 0.504 | 0.156 | -3.181 | 0.001 | 0.274 | 0.924 |
| FBLN1  | -0.677 | 0.306 | -2.213 | 0.027 | 0.508 | 0.155 | -3.165 | 0.002 | 0.279 | 0.925 |
| FBL    | -0.33  | 0.298 | -1.105 | 0.269 | 0.719 | 0.215 | -1.309 | 0.19  | 0.401 | 1.29  |
| FAXDC2 | -0.252 | 0.297 | -0.849 | 0.396 | 0.777 | 0.231 | -0.966 | 0.334 | 0.434 | 1.391 |
| FAU    | 0.477  | 0.302 | 1.578  | 0.115 | 1.611 | 0.487 | 1.255  | 0.21  | 0.891 | 2.913 |

|          |        |       |        |       |       |       |        |       |       |       |
|----------|--------|-------|--------|-------|-------|-------|--------|-------|-------|-------|
| FAT4     | -0.733 | 0.307 | -2.388 | 0.017 | 0.48  | 0.148 | -3.523 | 0     | 0.263 | 0.877 |
| FAT2     | -0.001 | 0.295 | -0.004 | 0.996 | 0.999 | 0.295 | -0.004 | 0.996 | 0.56  | 1.781 |
| FAT1     | -0.131 | 0.297 | -0.443 | 0.658 | 0.877 | 0.26  | -0.473 | 0.636 | 0.49  | 1.568 |
| FASTKD5  | 0.222  | 0.299 | 0.744  | 0.457 | 1.249 | 0.373 | 0.667  | 0.505 | 0.696 | 2.243 |
| FASTKD3  | -0.066 | 0.295 | -0.224 | 0.822 | 0.936 | 0.276 | -0.232 | 0.817 | 0.525 | 1.669 |
| FASTKD2  | 0.252  | 0.296 | 0.852  | 0.394 | 1.287 | 0.381 | 0.753  | 0.452 | 0.72  | 2.3   |
| FASTKD1  | 0.069  | 0.295 | 0.233  | 0.816 | 1.071 | 0.316 | 0.225  | 0.822 | 0.6   | 1.911 |
| FASTK    | 0.081  | 0.296 | 0.274  | 0.784 | 1.085 | 0.321 | 0.263  | 0.792 | 0.607 | 1.938 |
| FASN     | -0.314 | 0.299 | -1.051 | 0.293 | 0.731 | 0.218 | -1.234 | 0.217 | 0.407 | 1.312 |
| FASLG    | -0.35  | 0.298 | -1.173 | 0.241 | 0.705 | 0.21  | -1.405 | 0.16  | 0.393 | 1.264 |
| FAS      | -0.604 | 0.303 | -1.995 | 0.046 | 0.547 | 0.165 | -2.74  | 0.006 | 0.302 | 0.989 |
| FARSA    | -0.02  | 0.298 | -0.067 | 0.947 | 0.98  | 0.292 | -0.067 | 0.946 | 0.547 | 1.756 |
| FARS2    | -0.359 | 0.298 | -1.205 | 0.228 | 0.698 | 0.208 | -1.45  | 0.147 | 0.389 | 1.252 |
| FARP2    | -0.197 | 0.296 | -0.667 | 0.505 | 0.821 | 0.243 | -0.737 | 0.461 | 0.459 | 1.467 |
| FARP1    | -0.216 | 0.298 | -0.727 | 0.467 | 0.805 | 0.24  | -0.811 | 0.417 | 0.449 | 1.444 |
| FAR2     | -0.467 | 0.302 | -1.547 | 0.122 | 0.627 | 0.189 | -1.972 | 0.049 | 0.346 | 1.133 |
| FAP      | -0.85  | 0.315 | -2.7   | 0.007 | 0.427 | 0.135 | -4.255 | 0     | 0.231 | 0.792 |
| FANCL    | 0.614  | 0.306 | 2.006  | 0.045 | 1.848 | 0.566 | 1.499  | 0.134 | 1.014 | 3.367 |
| FANCI    | 0.494  | 0.303 | 1.633  | 0.102 | 1.639 | 0.496 | 1.289  | 0.197 | 0.906 | 2.966 |
| FANCG    | 0.805  | 0.31  | 2.597  | 0.009 | 2.237 | 0.693 | 1.784  | 0.074 | 1.218 | 4.107 |
| FANCF    | -0.14  | 0.299 | -0.467 | 0.641 | 0.87  | 0.26  | -0.501 | 0.617 | 0.484 | 1.563 |
| FANCE    | 0.318  | 0.296 | 1.073  | 0.283 | 1.375 | 0.407 | 0.919  | 0.358 | 0.769 | 2.457 |
| FANCC    | 0.599  | 0.31  | 1.929  | 0.054 | 1.819 | 0.565 | 1.451  | 0.147 | 0.99  | 3.342 |
| FANCA    | 0.616  | 0.306 | 2.014  | 0.044 | 1.852 | 0.567 | 1.504  | 0.133 | 1.017 | 3.374 |
| FAN1     | -0.049 | 0.296 | -0.165 | 0.869 | 0.952 | 0.282 | -0.169 | 0.866 | 0.534 | 1.7   |
| FAM98A   | -0.07  | 0.296 | -0.237 | 0.812 | 0.932 | 0.276 | -0.246 | 0.806 | 0.522 | 1.664 |
| FAM90A1  | -0.303 | 0.298 | -1.017 | 0.309 | 0.738 | 0.22  | -1.188 | 0.235 | 0.412 | 1.325 |
| FAM8A1   | -0.148 | 0.295 | -0.503 | 0.615 | 0.862 | 0.255 | -0.542 | 0.588 | 0.483 | 1.538 |
| FAM89B   | 0.032  | 0.295 | 0.107  | 0.915 | 1.032 | 0.305 | 0.106  | 0.916 | 0.579 | 1.84  |
| FAM86C1P | 0.031  | 0.295 | 0.106  | 0.916 | 1.032 | 0.305 | 0.104  | 0.917 | 0.578 | 1.841 |
| FAM83E   | 0.093  | 0.295 | 0.315  | 0.753 | 1.097 | 0.324 | 0.301  | 0.764 | 0.615 | 1.958 |
| FAM76A   | 0.757  | 0.315 | 2.404  | 0.016 | 2.132 | 0.671 | 1.686  | 0.092 | 1.15  | 3.952 |
| FAM66D   | -0.07  | 0.298 | -0.237 | 0.813 | 0.932 | 0.277 | -0.245 | 0.806 | 0.52  | 1.67  |
| FAM53C   | 0.06   | 0.297 | 0.201  | 0.841 | 1.061 | 0.315 | 0.195  | 0.845 | 0.593 | 1.9   |
| FAM53B   | -0.066 | 0.295 | -0.224 | 0.823 | 0.936 | 0.277 | -0.232 | 0.817 | 0.524 | 1.67  |
| FAM50B   | 0.026  | 0.295 | 0.089  | 0.929 | 1.026 | 0.303 | 0.087  | 0.93  | 0.576 | 1.83  |
| FAM50A   | 0.509  | 0.299 | 1.701  | 0.089 | 1.663 | 0.498 | 1.333  | 0.182 | 0.926 | 2.99  |
| FAM3C    | -0.223 | 0.296 | -0.753 | 0.452 | 0.8   | 0.237 | -0.843 | 0.399 | 0.448 | 1.43  |



|          |        |       |        |       |       |       |        |       |       |       |
|----------|--------|-------|--------|-------|-------|-------|--------|-------|-------|-------|
| FAM3A    | 0.259  | 0.296 | 0.873  | 0.382 | 1.295 | 0.384 | 0.77   | 0.442 | 0.725 | 2.316 |
| FAM32A   | 0.179  | 0.298 | 0.6    | 0.549 | 1.196 | 0.357 | 0.549  | 0.583 | 0.667 | 2.145 |
| FAM30A   | -0.705 | 0.306 | -2.302 | 0.021 | 0.494 | 0.151 | -3.344 | 0.001 | 0.271 | 0.901 |
| FAM234B  | -0.418 | 0.3   | -1.394 | 0.163 | 0.658 | 0.197 | -1.73  | 0.084 | 0.366 | 1.185 |
| FAM224A  | 0.108  | 0.295 | 0.364  | 0.716 | 1.114 | 0.329 | 0.346  | 0.73  | 0.624 | 1.986 |
| FAM222B  | 0.177  | 0.296 | 0.599  | 0.549 | 1.194 | 0.353 | 0.549  | 0.583 | 0.669 | 2.131 |
| FAM216A  | -0.006 | 0.295 | -0.019 | 0.985 | 0.994 | 0.294 | -0.019 | 0.985 | 0.557 | 1.774 |
| FAM215A  | -0.525 | 0.302 | -1.74  | 0.082 | 0.591 | 0.179 | -2.289 | 0.022 | 0.327 | 1.069 |
| FAM214B  | -0.321 | 0.3   | -1.068 | 0.285 | 0.726 | 0.218 | -1.259 | 0.208 | 0.403 | 1.307 |
| FAM20B   | -0.071 | 0.295 | -0.239 | 0.811 | 0.932 | 0.275 | -0.247 | 0.805 | 0.522 | 1.663 |
| FAM205BP | 0.515  | 0.302 | 1.702  | 0.089 | 1.673 | 0.506 | 1.331  | 0.183 | 0.925 | 3.026 |
| FAM204A  | -0.046 | 0.295 | -0.155 | 0.876 | 0.955 | 0.282 | -0.159 | 0.874 | 0.535 | 1.704 |
| FAM193B  | -0.131 | 0.297 | -0.44  | 0.66  | 0.877 | 0.261 | -0.47  | 0.638 | 0.49  | 1.571 |
| FAM193A  | 0.066  | 0.296 | 0.224  | 0.823 | 1.068 | 0.316 | 0.217  | 0.828 | 0.599 | 1.907 |
| FAM189B  | 0.411  | 0.298 | 1.378  | 0.168 | 1.509 | 0.45  | 1.13   | 0.258 | 0.841 | 2.707 |
| FAM189A2 | 0.355  | 0.298 | 1.19   | 0.234 | 1.426 | 0.425 | 1.002  | 0.316 | 0.795 | 2.556 |
| FAM189A1 | -0.679 | 0.31  | -2.193 | 0.028 | 0.507 | 0.157 | -3.139 | 0.002 | 0.276 | 0.93  |
| FAM186A  | -0.118 | 0.297 | -0.396 | 0.692 | 0.889 | 0.264 | -0.42  | 0.674 | 0.497 | 1.59  |
| FAM184A  | 0.115  | 0.295 | 0.39   | 0.696 | 1.122 | 0.331 | 0.369  | 0.712 | 0.629 | 2.001 |
| FAM174C  | -0.003 | 0.296 | -0.012 | 0.991 | 0.997 | 0.295 | -0.012 | 0.991 | 0.558 | 1.779 |
| FAM174B  | -0.696 | 0.315 | -2.211 | 0.027 | 0.499 | 0.157 | -3.195 | 0.001 | 0.269 | 0.924 |
| FAM172A  | -0.33  | 0.298 | -1.107 | 0.268 | 0.719 | 0.214 | -1.312 | 0.19  | 0.401 | 1.289 |
| FAM171A1 | -0.261 | 0.297 | -0.881 | 0.378 | 0.77  | 0.228 | -1.006 | 0.314 | 0.431 | 1.377 |
| FAM169A  | 0.776  | 0.315 | 2.467  | 0.014 | 2.174 | 0.684 | 1.716  | 0.086 | 1.173 | 4.028 |
| FAM168B  | -0.201 | 0.297 | -0.677 | 0.499 | 0.818 | 0.243 | -0.749 | 0.454 | 0.457 | 1.463 |
| FAM168A  | -0.161 | 0.296 | -0.544 | 0.587 | 0.851 | 0.252 | -0.59  | 0.555 | 0.477 | 1.521 |
| FAM163A  | 0.744  | 0.315 | 2.365  | 0.018 | 2.105 | 0.663 | 1.668  | 0.095 | 1.136 | 3.901 |
| FAM162A  | -0.108 | 0.297 | -0.364 | 0.716 | 0.898 | 0.266 | -0.385 | 0.7   | 0.502 | 1.605 |
| FAM160B2 | 0.243  | 0.296 | 0.82   | 0.412 | 1.275 | 0.378 | 0.728  | 0.466 | 0.713 | 2.279 |
| FAM155B  | 0.209  | 0.296 | 0.704  | 0.481 | 1.232 | 0.365 | 0.635  | 0.525 | 0.689 | 2.202 |
| FAM155A  | 0.049  | 0.296 | 0.165  | 0.869 | 1.05  | 0.31  | 0.161  | 0.872 | 0.588 | 1.874 |
| FAM153A  | -0.153 | 0.296 | -0.517 | 0.605 | 0.858 | 0.254 | -0.559 | 0.576 | 0.48  | 1.534 |
| FAM149B1 | -0.127 | 0.296 | -0.428 | 0.669 | 0.881 | 0.261 | -0.456 | 0.648 | 0.493 | 1.574 |
| FAM149A  | -0.625 | 0.306 | -2.044 | 0.041 | 0.535 | 0.164 | -2.839 | 0.005 | 0.294 | 0.975 |
| FAM13C   | 0.555  | 0.303 | 1.833  | 0.067 | 1.741 | 0.527 | 1.407  | 0.16  | 0.962 | 3.151 |
| FAM13B   | -0.164 | 0.295 | -0.555 | 0.579 | 0.849 | 0.251 | -0.603 | 0.546 | 0.476 | 1.514 |
| FAM13A   | 0.561  | 0.302 | 1.856  | 0.064 | 1.752 | 0.53  | 1.42   | 0.156 | 0.969 | 3.17  |
| FAM135A  | 0.345  | 0.298 | 1.159  | 0.246 | 1.412 | 0.42  | 0.98   | 0.327 | 0.788 | 2.531 |

|          |        |       |        |       |       |       |        |       |       |       |
|----------|--------|-------|--------|-------|-------|-------|--------|-------|-------|-------|
| FAM131B  | 0.382  | 0.3   | 1.273  | 0.203 | 1.464 | 0.439 | 1.058  | 0.29  | 0.814 | 2.635 |
| FAM131A  | 0.528  | 0.3   | 1.762  | 0.078 | 1.696 | 0.509 | 1.369  | 0.171 | 0.942 | 3.053 |
| FAM124B  | 0.006  | 0.295 | 0.022  | 0.982 | 1.007 | 0.297 | 0.022  | 0.983 | 0.564 | 1.796 |
| FAM120C  | 0.459  | 0.301 | 1.527  | 0.127 | 1.582 | 0.476 | 1.225  | 0.221 | 0.878 | 2.852 |
| FAM120A  | -0.543 | 0.301 | -1.808 | 0.071 | 0.581 | 0.175 | -2.402 | 0.016 | 0.322 | 1.047 |
| FAM118A  | 0.127  | 0.296 | 0.427  | 0.669 | 1.135 | 0.336 | 0.401  | 0.688 | 0.635 | 2.029 |
| FAM117A  | -0.286 | 0.296 | -0.966 | 0.334 | 0.751 | 0.222 | -1.118 | 0.263 | 0.42  | 1.342 |
| FAM114A2 | -0.152 | 0.297 | -0.512 | 0.609 | 0.859 | 0.255 | -0.553 | 0.58  | 0.48  | 1.536 |
| FAM114A1 | -0.155 | 0.299 | -0.518 | 0.604 | 0.857 | 0.256 | -0.56  | 0.575 | 0.477 | 1.538 |
| FAM111A  | 0.398  | 0.3   | 1.329  | 0.184 | 1.489 | 0.447 | 1.096  | 0.273 | 0.828 | 2.681 |
| FAM110D  | 0.076  | 0.296 | 0.256  | 0.798 | 1.079 | 0.319 | 0.246  | 0.805 | 0.604 | 1.926 |
| FAM110B  | -0.336 | 0.3   | -1.12  | 0.263 | 0.715 | 0.214 | -1.331 | 0.183 | 0.397 | 1.286 |
| FAM107A  | 0.023  | 0.295 | 0.077  | 0.939 | 1.023 | 0.302 | 0.076  | 0.939 | 0.574 | 1.824 |
| FAM106A  | 0.136  | 0.297 | 0.456  | 0.648 | 1.145 | 0.34  | 0.427  | 0.67  | 0.64  | 2.05  |
| FAM102A  | -0.389 | 0.3   | -1.297 | 0.195 | 0.678 | 0.203 | -1.585 | 0.113 | 0.377 | 1.22  |
| FAIM2    | -0.048 | 0.296 | -0.162 | 0.871 | 0.953 | 0.282 | -0.166 | 0.868 | 0.534 | 1.702 |
| FAIM     | 0.792  | 0.307 | 2.575  | 0.01  | 2.207 | 0.678 | 1.779  | 0.075 | 1.208 | 4.031 |
| FAHD2A   | 0.466  | 0.302 | 1.541  | 0.123 | 1.593 | 0.481 | 1.232  | 0.218 | 0.881 | 2.881 |
| FAH      | 0.02   | 0.296 | 0.067  | 0.946 | 1.02  | 0.302 | 0.067  | 0.947 | 0.571 | 1.822 |
| FAF2     | 0.441  | 0.298 | 1.478  | 0.139 | 1.554 | 0.464 | 1.195  | 0.232 | 0.866 | 2.789 |
| FAF1     | 0.011  | 0.295 | 0.038  | 0.97  | 1.011 | 0.299 | 0.038  | 0.97  | 0.567 | 1.804 |
| FADS3    | 0.322  | 0.298 | 1.081  | 0.28  | 1.38  | 0.411 | 0.925  | 0.355 | 0.77  | 2.473 |
| FADS2    | 0.199  | 0.296 | 0.671  | 0.502 | 1.22  | 0.361 | 0.609  | 0.543 | 0.683 | 2.18  |
| FADD     | 0.811  | 0.308 | 2.633  | 0.008 | 2.25  | 0.693 | 1.804  | 0.071 | 1.23  | 4.114 |
| FABP7    | 0.072  | 0.297 | 0.242  | 0.808 | 1.075 | 0.32  | 0.234  | 0.815 | 0.6   | 1.925 |
| FABP6    | -0.142 | 0.296 | -0.477 | 0.633 | 0.868 | 0.257 | -0.513 | 0.608 | 0.486 | 1.552 |
| FABP5    | 0.683  | 0.31  | 2.205  | 0.027 | 1.98  | 0.613 | 1.598  | 0.11  | 1.079 | 3.633 |
| FABP4    | 0.046  | 0.295 | 0.154  | 0.877 | 1.047 | 0.309 | 0.151  | 0.88  | 0.587 | 1.868 |
| FABP3    | 0.358  | 0.298 | 1.201  | 0.23  | 1.43  | 0.426 | 1.01   | 0.312 | 0.798 | 2.563 |
| FABP2    | -0.581 | 0.31  | -1.876 | 0.061 | 0.559 | 0.173 | -2.544 | 0.011 | 0.305 | 1.026 |
| FABP1    | 0.304  | 0.298 | 1.02   | 0.308 | 1.355 | 0.403 | 0.88   | 0.379 | 0.756 | 2.428 |
| FAAP24   | 0.139  | 0.296 | 0.47   | 0.639 | 1.149 | 0.34  | 0.438  | 0.661 | 0.644 | 2.052 |
| FAAP100  | 0.531  | 0.302 | 1.758  | 0.079 | 1.701 | 0.514 | 1.364  | 0.173 | 0.941 | 3.076 |
| FAAH     | -0.466 | 0.307 | -1.521 | 0.128 | 0.627 | 0.192 | -1.938 | 0.053 | 0.344 | 1.144 |
| FA2H     | 1.104  | 0.322 | 3.433  | 0.001 | 3.016 | 0.97  | 2.079  | 0.038 | 1.606 | 5.665 |
| F9       | -0.075 | 0.295 | -0.253 | 0.8   | 0.928 | 0.274 | -0.263 | 0.793 | 0.52  | 1.655 |
| F8       | -0.431 | 0.3   | -1.436 | 0.151 | 0.65  | 0.195 | -1.795 | 0.073 | 0.361 | 1.17  |
| F7       | 0.412  | 0.299 | 1.378  | 0.168 | 1.51  | 0.452 | 1.129  | 0.259 | 0.84  | 2.714 |

|         |        |       |        |       |       |       |        |       |       |       |
|---------|--------|-------|--------|-------|-------|-------|--------|-------|-------|-------|
| F5      | -0.164 | 0.296 | -0.553 | 0.58  | 0.849 | 0.251 | -0.601 | 0.548 | 0.475 | 1.517 |
| F3      | -0.326 | 0.298 | -1.093 | 0.275 | 0.722 | 0.215 | -1.292 | 0.196 | 0.403 | 1.295 |
| F2RL3   | 0.116  | 0.295 | 0.393  | 0.694 | 1.123 | 0.332 | 0.371  | 0.711 | 0.629 | 2.004 |
| F2RL2   | -1.017 | 0.321 | -3.166 | 0.002 | 0.362 | 0.116 | -5.492 | 0     | 0.193 | 0.679 |
| F2RL1   | 0.214  | 0.296 | 0.723  | 0.47  | 1.239 | 0.367 | 0.651  | 0.515 | 0.693 | 2.215 |
| F2R     | -0.61  | 0.302 | -2.017 | 0.044 | 0.543 | 0.164 | -2.779 | 0.005 | 0.3   | 0.983 |
| F2      | 0.247  | 0.298 | 0.83   | 0.406 | 1.28  | 0.381 | 0.736  | 0.462 | 0.714 | 2.294 |
| F13B    | 0.423  | 0.3   | 1.412  | 0.158 | 1.527 | 0.458 | 1.151  | 0.25  | 0.848 | 2.749 |
| F13A1   | -0.836 | 0.311 | -2.689 | 0.007 | 0.433 | 0.135 | -4.204 | 0     | 0.236 | 0.797 |
| F12     | 0.026  | 0.296 | 0.09   | 0.929 | 1.027 | 0.303 | 0.088  | 0.93  | 0.575 | 1.833 |
| F11R    | 0.731  | 0.31  | 2.357  | 0.018 | 2.076 | 0.643 | 1.673  | 0.094 | 1.131 | 3.811 |
| F11     | -0.112 | 0.296 | -0.379 | 0.704 | 0.894 | 0.264 | -0.401 | 0.688 | 0.501 | 1.596 |
| F10     | 0.797  | 0.311 | 2.564  | 0.01  | 2.218 | 0.69  | 1.767  | 0.077 | 1.206 | 4.08  |
| EZR     | -0.108 | 0.296 | -0.364 | 0.716 | 0.898 | 0.266 | -0.384 | 0.701 | 0.502 | 1.604 |
| EZH2    | 0.629  | 0.306 | 2.057  | 0.04  | 1.875 | 0.573 | 1.527  | 0.127 | 1.03  | 3.413 |
| EZH1    | -0.29  | 0.296 | -0.977 | 0.328 | 0.748 | 0.222 | -1.134 | 0.257 | 0.419 | 1.338 |
| EYA4    | -0.078 | 0.296 | -0.265 | 0.791 | 0.925 | 0.274 | -0.275 | 0.783 | 0.517 | 1.652 |
| EYA3    | -0.019 | 0.295 | -0.065 | 0.948 | 0.981 | 0.29  | -0.066 | 0.948 | 0.55  | 1.75  |
| EYA2    | 0.033  | 0.295 | 0.112  | 0.911 | 1.034 | 0.305 | 0.11   | 0.912 | 0.58  | 1.843 |
| EYA1    | -0.029 | 0.295 | -0.098 | 0.922 | 0.971 | 0.287 | -0.099 | 0.921 | 0.545 | 1.732 |
| EXTL3   | 0.777  | 0.31  | 2.507  | 0.012 | 2.176 | 0.675 | 1.743  | 0.081 | 1.185 | 3.995 |
| EXTL2   | 0.108  | 0.296 | 0.364  | 0.716 | 1.114 | 0.33  | 0.345  | 0.73  | 0.623 | 1.991 |
| EXTL1   | 0.502  | 0.3   | 1.671  | 0.095 | 1.652 | 0.496 | 1.314  | 0.189 | 0.917 | 2.975 |
| EXT2    | -0.041 | 0.296 | -0.139 | 0.889 | 0.96  | 0.284 | -0.142 | 0.887 | 0.537 | 1.714 |
| EXT1    | -0.04  | 0.295 | -0.135 | 0.892 | 0.961 | 0.284 | -0.138 | 0.89  | 0.539 | 1.713 |
| EXPH5   | -0.042 | 0.296 | -0.143 | 0.886 | 0.959 | 0.283 | -0.146 | 0.884 | 0.537 | 1.711 |
| EXOSC9  | 0.806  | 0.31  | 2.601  | 0.009 | 2.24  | 0.694 | 1.786  | 0.074 | 1.22  | 4.112 |
| EXOSC8  | 0.05   | 0.295 | 0.17   | 0.865 | 1.051 | 0.31  | 0.166  | 0.868 | 0.589 | 1.876 |
| EXOSC7  | 0.334  | 0.298 | 1.121  | 0.262 | 1.396 | 0.416 | 0.953  | 0.34  | 0.779 | 2.503 |
| EXOSC5  | 0.107  | 0.295 | 0.362  | 0.717 | 1.113 | 0.329 | 0.344  | 0.731 | 0.624 | 1.986 |
| EXOSC4  | 0.65   | 0.306 | 2.127  | 0.033 | 1.916 | 0.586 | 1.564  | 0.118 | 1.052 | 3.487 |
| EXOSC2  | 0.947  | 0.321 | 2.949  | 0.003 | 2.577 | 0.827 | 1.907  | 0.057 | 1.374 | 4.833 |
| EXOSC10 | -0.074 | 0.297 | -0.251 | 0.802 | 0.928 | 0.275 | -0.261 | 0.794 | 0.519 | 1.66  |
| EXOSC1  | 0.129  | 0.295 | 0.438  | 0.661 | 1.138 | 0.336 | 0.411  | 0.681 | 0.638 | 2.03  |
| EXOG    | 0.084  | 0.296 | 0.285  | 0.776 | 1.088 | 0.322 | 0.273  | 0.785 | 0.609 | 1.943 |
| EXOC7   | 0.187  | 0.299 | 0.625  | 0.532 | 1.205 | 0.36  | 0.57   | 0.569 | 0.671 | 2.163 |
| EXOC6B  | 0.388  | 0.299 | 1.299  | 0.194 | 1.474 | 0.44  | 1.077  | 0.282 | 0.821 | 2.645 |
| EXOC5   | -0.555 | 0.306 | -1.815 | 0.069 | 0.574 | 0.175 | -2.426 | 0.015 | 0.316 | 1.045 |

|        |        |       |        |       |       |       |        |       |       |       |
|--------|--------|-------|--------|-------|-------|-------|--------|-------|-------|-------|
| EXOC3  | 0.06   | 0.296 | 0.204  | 0.838 | 1.062 | 0.314 | 0.198  | 0.843 | 0.595 | 1.898 |
| EXOC2  | -0.306 | 0.298 | -1.028 | 0.304 | 0.737 | 0.219 | -1.202 | 0.229 | 0.411 | 1.32  |
| EXOC1  | -0.097 | 0.296 | -0.328 | 0.743 | 0.908 | 0.269 | -0.344 | 0.731 | 0.508 | 1.621 |
| EXO5   | 0.25   | 0.297 | 0.841  | 0.4   | 1.284 | 0.382 | 0.744  | 0.457 | 0.717 | 2.301 |
| EXO1   | 1.129  | 0.336 | 3.359  | 0.001 | 3.091 | 1.039 | 2.013  | 0.044 | 1.6   | 5.972 |
| EXD3   | 1.301  | 0.337 | 3.861  | 0     | 3.674 | 1.238 | 2.16   | 0.031 | 1.898 | 7.111 |
| EXD2   | 0.12   | 0.297 | 0.404  | 0.687 | 1.128 | 0.335 | 0.38   | 0.704 | 0.629 | 2.02  |
| EWSR1  | 0.911  | 0.315 | 2.895  | 0.004 | 2.487 | 0.783 | 1.9    | 0.057 | 1.342 | 4.61  |
| EVX1   | 0.686  | 0.31  | 2.215  | 0.027 | 1.987 | 0.616 | 1.603  | 0.109 | 1.082 | 3.647 |
| EVPL   | 0.352  | 0.3   | 1.177  | 0.239 | 1.422 | 0.426 | 0.992  | 0.321 | 0.791 | 2.559 |
| EVL    | -0.712 | 0.31  | -2.3   | 0.021 | 0.49  | 0.152 | -3.355 | 0.001 | 0.267 | 0.9   |
| EVI5   | -0.505 | 0.302 | -1.669 | 0.095 | 0.604 | 0.182 | -2.171 | 0.03  | 0.334 | 1.092 |
| EVI2B  | -0.56  | 0.303 | -1.851 | 0.064 | 0.571 | 0.173 | -2.482 | 0.013 | 0.315 | 1.033 |
| EVI2A  | -0.744 | 0.307 | -2.422 | 0.015 | 0.475 | 0.146 | -3.595 | 0     | 0.26  | 0.868 |
| EVC    | -0.502 | 0.299 | -1.677 | 0.093 | 0.605 | 0.181 | -2.179 | 0.029 | 0.337 | 1.088 |
| EVA1B  | -0.334 | 0.3   | -1.114 | 0.265 | 0.716 | 0.215 | -1.323 | 0.186 | 0.398 | 1.289 |
| ETV7   | 0.262  | 0.298 | 0.879  | 0.379 | 1.299 | 0.387 | 0.774  | 0.439 | 0.725 | 2.328 |
| ETV6   | 0.127  | 0.295 | 0.43   | 0.667 | 1.136 | 0.336 | 0.404  | 0.686 | 0.636 | 2.026 |
| ETV5   | -0.318 | 0.3   | -1.061 | 0.289 | 0.728 | 0.218 | -1.248 | 0.212 | 0.405 | 1.309 |
| ETV4   | 0.073  | 0.295 | 0.248  | 0.804 | 1.076 | 0.318 | 0.239  | 0.811 | 0.603 | 1.92  |
| ETV3   | 0.673  | 0.31  | 2.172  | 0.03  | 1.96  | 0.607 | 1.581  | 0.114 | 1.068 | 3.598 |
| ETV2   | 0.218  | 0.296 | 0.737  | 0.461 | 1.244 | 0.368 | 0.662  | 0.508 | 0.696 | 2.222 |
| ETV1   | -0.26  | 0.298 | -0.873 | 0.383 | 0.771 | 0.23  | -0.997 | 0.319 | 0.43  | 1.382 |
| ETS2   | -0.463 | 0.3   | -1.54  | 0.123 | 0.63  | 0.189 | -1.959 | 0.05  | 0.349 | 1.134 |
| ETS1   | -0.23  | 0.296 | -0.776 | 0.438 | 0.795 | 0.236 | -0.872 | 0.383 | 0.444 | 1.42  |
| ETNPPL | 0.085  | 0.295 | 0.288  | 0.774 | 1.089 | 0.322 | 0.276  | 0.783 | 0.61  | 1.942 |
| ETNK2  | 0.056  | 0.295 | 0.19   | 0.85  | 1.058 | 0.312 | 0.184  | 0.854 | 0.593 | 1.887 |
| ETNK1  | -0.135 | 0.296 | -0.454 | 0.65  | 0.874 | 0.259 | -0.486 | 0.627 | 0.489 | 1.562 |
| ETHE1  | -0.39  | 0.3   | -1.3   | 0.194 | 0.677 | 0.203 | -1.59  | 0.112 | 0.376 | 1.219 |
| ETFDH  | -0.228 | 0.298 | -0.767 | 0.443 | 0.796 | 0.237 | -0.862 | 0.389 | 0.444 | 1.426 |
| ETFB   | 0.56   | 0.302 | 1.853  | 0.064 | 1.751 | 0.53  | 1.419  | 0.156 | 0.968 | 3.168 |
| ETFA   | 0.645  | 0.305 | 2.116  | 0.034 | 1.907 | 0.582 | 1.559  | 0.119 | 1.049 | 3.467 |
| ETF1   | -0.125 | 0.295 | -0.424 | 0.672 | 0.882 | 0.261 | -0.451 | 0.652 | 0.495 | 1.574 |
| ETAA1  | 0.247  | 0.298 | 0.829  | 0.407 | 1.28  | 0.381 | 0.734  | 0.463 | 0.714 | 2.294 |
| ESYT1  | -0.021 | 0.295 | -0.071 | 0.944 | 0.979 | 0.289 | -0.072 | 0.943 | 0.549 | 1.746 |
| ESRRG  | 0.497  | 0.303 | 1.641  | 0.101 | 1.643 | 0.497 | 1.294  | 0.196 | 0.908 | 2.974 |
| ESRRB  | -0.608 | 0.306 | -1.985 | 0.047 | 0.544 | 0.167 | -2.733 | 0.006 | 0.298 | 0.992 |
| ESRRA  | 0.452  | 0.302 | 1.496  | 0.135 | 1.572 | 0.475 | 1.203  | 0.229 | 0.869 | 2.844 |

|            |        |       |        |       |       |       |        |       |       |       |
|------------|--------|-------|--------|-------|-------|-------|--------|-------|-------|-------|
| ESRP1      | 0.302  | 0.298 | 1.015  | 0.31  | 1.353 | 0.403 | 0.876  | 0.381 | 0.755 | 2.424 |
| ESR2       | -0.131 | 0.297 | -0.439 | 0.661 | 0.878 | 0.261 | -0.469 | 0.639 | 0.49  | 1.572 |
| ESR1       | -0.315 | 0.3   | -1.05  | 0.294 | 0.73  | 0.219 | -1.233 | 0.217 | 0.406 | 1.314 |
| ESPL1      | 0.865  | 0.321 | 2.698  | 0.007 | 2.376 | 0.762 | 1.805  | 0.071 | 1.267 | 4.456 |
| ESM1       | 0.268  | 0.296 | 0.903  | 0.367 | 1.307 | 0.387 | 0.792  | 0.428 | 0.731 | 2.336 |
| ESF1       | 0.045  | 0.295 | 0.152  | 0.879 | 1.046 | 0.309 | 0.149  | 0.882 | 0.586 | 1.866 |
| ESD        | -0.225 | 0.298 | -0.755 | 0.45  | 0.799 | 0.238 | -0.847 | 0.397 | 0.446 | 1.431 |
| ERVMER34-1 | 0.218  | 0.296 | 0.737  | 0.461 | 1.244 | 0.368 | 0.662  | 0.508 | 0.696 | 2.223 |
| ERVK3-2    | -0.232 | 0.298 | -0.781 | 0.435 | 0.793 | 0.236 | -0.879 | 0.38  | 0.442 | 1.42  |
| ERVH-6     | 0.058  | 0.295 | 0.197  | 0.844 | 1.06  | 0.313 | 0.192  | 0.848 | 0.594 | 1.891 |
| ERVH-4     | -0.116 | 0.295 | -0.394 | 0.693 | 0.89  | 0.263 | -0.418 | 0.676 | 0.499 | 1.588 |
| ERV9-1     | 0.65   | 0.31  | 2.099  | 0.036 | 1.916 | 0.594 | 1.543  | 0.123 | 1.044 | 3.517 |
| ERV3-2     | -0.306 | 0.298 | -1.027 | 0.304 | 0.737 | 0.219 | -1.202 | 0.229 | 0.411 | 1.32  |
| ERP44      | 0.387  | 0.3   | 1.289  | 0.197 | 1.472 | 0.442 | 1.069  | 0.285 | 0.818 | 2.651 |
| ERP29      | -0.323 | 0.3   | -1.077 | 0.282 | 0.724 | 0.217 | -1.271 | 0.204 | 0.402 | 1.304 |
| ERO1B      | -0.102 | 0.295 | -0.346 | 0.73  | 0.903 | 0.267 | -0.364 | 0.716 | 0.506 | 1.611 |
| ERO1A      | -0.269 | 0.3   | -0.894 | 0.371 | 0.764 | 0.23  | -1.026 | 0.305 | 0.424 | 1.377 |
| ERN2       | 0.001  | 0.295 | 0.005  | 0.996 | 1.001 | 0.295 | 0.005  | 0.996 | 0.562 | 1.786 |
| ERN1       | 0.331  | 0.298 | 1.111  | 0.267 | 1.392 | 0.415 | 0.946  | 0.344 | 0.776 | 2.497 |
| ERMP1      | -0.34  | 0.3   | -1.134 | 0.257 | 0.712 | 0.213 | -1.351 | 0.177 | 0.396 | 1.281 |
| ERMAP      | -0.282 | 0.3   | -0.939 | 0.348 | 0.754 | 0.226 | -1.085 | 0.278 | 0.419 | 1.358 |
| ERLIN2     | -0.131 | 0.296 | -0.441 | 0.659 | 0.877 | 0.26  | -0.472 | 0.637 | 0.491 | 1.568 |
| ERLIN1     | -0.135 | 0.298 | -0.452 | 0.651 | 0.874 | 0.26  | -0.484 | 0.628 | 0.488 | 1.567 |
| ERICH1     | -0.277 | 0.298 | -0.928 | 0.353 | 0.758 | 0.226 | -1.069 | 0.285 | 0.423 | 1.36  |
| ERI3       | 0.3    | 0.298 | 1.006  | 0.315 | 1.349 | 0.402 | 0.869  | 0.385 | 0.753 | 2.419 |
| ERI2       | 0.535  | 0.302 | 1.769  | 0.077 | 1.707 | 0.516 | 1.37   | 0.171 | 0.944 | 3.087 |
| ERH        | 0.112  | 0.298 | 0.374  | 0.708 | 1.118 | 0.333 | 0.354  | 0.723 | 0.623 | 2.005 |
| ERGIC3     | -0.886 | 0.312 | -2.835 | 0.005 | 0.412 | 0.129 | -4.56  | 0     | 0.224 | 0.761 |
| ERGIC2     | 0.873  | 0.311 | 2.802  | 0.005 | 2.393 | 0.745 | 1.869  | 0.062 | 1.3   | 4.406 |
| ERG28      | -0.086 | 0.297 | -0.289 | 0.773 | 0.918 | 0.272 | -0.301 | 0.763 | 0.513 | 1.642 |
| ERG        | -0.345 | 0.298 | -1.158 | 0.247 | 0.708 | 0.211 | -1.382 | 0.167 | 0.395 | 1.27  |
| ERF        | 0.168  | 0.295 | 0.568  | 0.57  | 1.183 | 0.349 | 0.523  | 0.601 | 0.663 | 2.11  |
| EREG       | 0.088  | 0.295 | 0.297  | 0.767 | 1.092 | 0.322 | 0.284  | 0.776 | 0.612 | 1.947 |
| ERCC8      | 0.13   | 0.295 | 0.44   | 0.66  | 1.139 | 0.336 | 0.412  | 0.68  | 0.639 | 2.03  |
| ERCC6L     | 0.89   | 0.315 | 2.825  | 0.005 | 2.435 | 0.767 | 1.871  | 0.061 | 1.313 | 4.516 |
| ERCC6      | -0.089 | 0.296 | -0.3   | 0.764 | 0.915 | 0.271 | -0.313 | 0.754 | 0.512 | 1.635 |
| ERCC5      | 0.352  | 0.302 | 1.166  | 0.244 | 1.423 | 0.43  | 0.983  | 0.326 | 0.787 | 2.573 |
| ERCC4      | 0.639  | 0.306 | 2.09   | 0.037 | 1.895 | 0.58  | 1.544  | 0.122 | 1.041 | 3.451 |

|          |        |       |        |       |       |       |        |       |       |       |
|----------|--------|-------|--------|-------|-------|-------|--------|-------|-------|-------|
| ERCC3    | 0.087  | 0.297 | 0.292  | 0.77  | 1.091 | 0.324 | 0.28   | 0.78  | 0.609 | 1.952 |
| ERCC2    | -0.482 | 0.306 | -1.574 | 0.115 | 0.617 | 0.189 | -2.023 | 0.043 | 0.339 | 1.125 |
| ERCC1    | -0.72  | 0.315 | -2.286 | 0.022 | 0.487 | 0.153 | -3.349 | 0.001 | 0.262 | 0.902 |
| ERC2-IT1 | 0.451  | 0.3   | 1.505  | 0.132 | 1.57  | 0.471 | 1.211  | 0.226 | 0.873 | 2.825 |
| ERC2     | -0.047 | 0.296 | -0.158 | 0.875 | 0.954 | 0.283 | -0.162 | 0.872 | 0.534 | 1.706 |
| ERC1     | 0.628  | 0.306 | 2.052  | 0.04  | 1.873 | 0.573 | 1.524  | 0.128 | 1.028 | 3.413 |
| ERBIN    | -0.192 | 0.301 | -0.638 | 0.524 | 0.825 | 0.249 | -0.703 | 0.482 | 0.457 | 1.489 |
| ERBB4    | -0.719 | 0.315 | -2.282 | 0.022 | 0.487 | 0.153 | -3.34  | 0.001 | 0.263 | 0.903 |
| ERBB3    | -0.588 | 0.303 | -1.945 | 0.052 | 0.555 | 0.168 | -2.648 | 0.008 | 0.307 | 1.005 |
| ERBB2    | -0.215 | 0.296 | -0.725 | 0.469 | 0.807 | 0.239 | -0.809 | 0.419 | 0.451 | 1.442 |
| ERAP2    | -0.655 | 0.306 | -2.142 | 0.032 | 0.52  | 0.159 | -3.025 | 0.002 | 0.285 | 0.946 |
| ERAP1    | -0.014 | 0.296 | -0.049 | 0.961 | 0.986 | 0.292 | -0.049 | 0.961 | 0.552 | 1.761 |
| ERAL1    | 0.08   | 0.297 | 0.27   | 0.787 | 1.083 | 0.322 | 0.259  | 0.796 | 0.605 | 1.939 |
| EPYC     | -0.71  | 0.31  | -2.288 | 0.022 | 0.492 | 0.153 | -3.332 | 0.001 | 0.268 | 0.903 |
| EPX      | -0.128 | 0.296 | -0.434 | 0.664 | 0.879 | 0.26  | -0.464 | 0.643 | 0.493 | 1.57  |
| EPS8L3   | -0.254 | 0.296 | -0.858 | 0.391 | 0.775 | 0.23  | -0.978 | 0.328 | 0.434 | 1.386 |
| EPS8L2   | 0.06   | 0.295 | 0.203  | 0.839 | 1.062 | 0.313 | 0.197  | 0.844 | 0.595 | 1.893 |
| EPS8L1   | -0.104 | 0.295 | -0.352 | 0.725 | 0.901 | 0.266 | -0.371 | 0.711 | 0.505 | 1.608 |
| EPS8     | 0.107  | 0.295 | 0.363  | 0.717 | 1.113 | 0.329 | 0.344  | 0.731 | 0.624 | 1.985 |
| EPS15L1  | 0.783  | 0.31  | 2.524  | 0.012 | 2.188 | 0.679 | 1.75   | 0.08  | 1.191 | 4.018 |
| EPS15    | -0.24  | 0.298 | -0.807 | 0.42  | 0.786 | 0.234 | -0.912 | 0.362 | 0.439 | 1.409 |
| EPRS1    | 0.122  | 0.296 | 0.413  | 0.68  | 1.13  | 0.334 | 0.389  | 0.698 | 0.633 | 2.018 |
| EPPK1    | 0.04   | 0.299 | 0.133  | 0.894 | 1.041 | 0.311 | 0.131  | 0.896 | 0.579 | 1.871 |
| EPOR     | -0.543 | 0.302 | -1.795 | 0.073 | 0.581 | 0.176 | -2.383 | 0.017 | 0.321 | 1.051 |
| EPO      | 0.199  | 0.296 | 0.673  | 0.501 | 1.22  | 0.361 | 0.611  | 0.542 | 0.683 | 2.18  |
| EPN3     | 0.504  | 0.301 | 1.677  | 0.093 | 1.656 | 0.498 | 1.317  | 0.188 | 0.918 | 2.985 |
| EPN1     | 0.408  | 0.3   | 1.359  | 0.174 | 1.504 | 0.451 | 1.116  | 0.264 | 0.835 | 2.708 |
| EPM2AIP1 | -0.086 | 0.296 | -0.289 | 0.773 | 0.918 | 0.272 | -0.302 | 0.763 | 0.514 | 1.641 |
| EPM2A    | 0.038  | 0.295 | 0.13   | 0.897 | 1.039 | 0.307 | 0.127  | 0.899 | 0.583 | 1.853 |
| EPHX3    | 0.291  | 0.297 | 0.983  | 0.326 | 1.338 | 0.397 | 0.852  | 0.394 | 0.748 | 2.394 |
| EPHX2    | -0.815 | 0.321 | -2.541 | 0.011 | 0.442 | 0.142 | -3.927 | 0     | 0.236 | 0.83  |
| EPHX1    | -0.21  | 0.298 | -0.704 | 0.481 | 0.811 | 0.242 | -0.783 | 0.433 | 0.452 | 1.454 |
| EPHB6    | -0.421 | 0.298 | -1.409 | 0.159 | 0.657 | 0.196 | -1.752 | 0.08  | 0.366 | 1.179 |
| EPHB4    | 0.128  | 0.295 | 0.434  | 0.664 | 1.137 | 0.336 | 0.408  | 0.684 | 0.637 | 2.028 |
| EPHB3    | 0.699  | 0.31  | 2.255  | 0.024 | 2.013 | 0.624 | 1.622  | 0.105 | 1.096 | 3.696 |
| EPHB2    | 0.125  | 0.296 | 0.424  | 0.672 | 1.133 | 0.335 | 0.398  | 0.69  | 0.635 | 2.023 |
| EPHB1    | 0.077  | 0.295 | 0.261  | 0.794 | 1.08  | 0.319 | 0.251  | 0.802 | 0.605 | 1.927 |
| EPHA7    | -0.087 | 0.296 | -0.294 | 0.769 | 0.917 | 0.271 | -0.307 | 0.759 | 0.514 | 1.636 |

|             |        |       |        |       |       |       |        |       |       |       |
|-------------|--------|-------|--------|-------|-------|-------|--------|-------|-------|-------|
| EPHA5       | 0.429  | 0.306 | 1.399  | 0.162 | 1.535 | 0.47  | 1.138  | 0.255 | 0.842 | 2.799 |
| EPHA4       | 0.105  | 0.297 | 0.353  | 0.724 | 1.11  | 0.329 | 0.335  | 0.738 | 0.621 | 1.985 |
| EPHA3       | -0.736 | 0.31  | -2.376 | 0.018 | 0.479 | 0.148 | -3.511 | 0     | 0.261 | 0.879 |
| EPHA2       | -0.227 | 0.298 | -0.76  | 0.447 | 0.797 | 0.238 | -0.853 | 0.394 | 0.445 | 1.43  |
| EPHA1       | -0.616 | 0.303 | -2.034 | 0.042 | 0.54  | 0.164 | -2.812 | 0.005 | 0.299 | 0.978 |
| EPCAM       | 0.918  | 0.321 | 2.861  | 0.004 | 2.504 | 0.804 | 1.872  | 0.061 | 1.335 | 4.697 |
| EPB42       | 0.316  | 0.3   | 1.055  | 0.291 | 1.372 | 0.411 | 0.905  | 0.366 | 0.762 | 2.468 |
| EPB41L5     | -0.158 | 0.296 | -0.533 | 0.594 | 0.854 | 0.253 | -0.578 | 0.563 | 0.478 | 1.526 |
| EPB41L4B    | -0.409 | 0.3   | -1.365 | 0.172 | 0.664 | 0.199 | -1.686 | 0.092 | 0.369 | 1.195 |
| EPB41L4A-DT | -0.106 | 0.296 | -0.359 | 0.719 | 0.899 | 0.266 | -0.379 | 0.705 | 0.504 | 1.605 |
| EPB41L4A    | -0.188 | 0.298 | -0.632 | 0.528 | 0.828 | 0.247 | -0.695 | 0.487 | 0.462 | 1.486 |
| EPB41L3     | -0.668 | 0.31  | -2.154 | 0.031 | 0.513 | 0.159 | -3.064 | 0.002 | 0.279 | 0.942 |
| EPB41L2     | -0.882 | 0.315 | -2.799 | 0.005 | 0.414 | 0.13  | -4.494 | 0     | 0.223 | 0.768 |
| EPB41L1     | 0.204  | 0.296 | 0.687  | 0.492 | 1.226 | 0.363 | 0.622  | 0.534 | 0.686 | 2.19  |
| EPB41       | 0.191  | 0.296 | 0.645  | 0.519 | 1.21  | 0.359 | 0.587  | 0.557 | 0.677 | 2.164 |
| EPAS1       | -0.569 | 0.301 | -1.895 | 0.058 | 0.566 | 0.17  | -2.553 | 0.011 | 0.314 | 1.02  |
| EP400       | -1.037 | 0.323 | -3.209 | 0.001 | 0.355 | 0.115 | -5.633 | 0     | 0.188 | 0.668 |
| EP300       | -0.626 | 0.306 | -2.047 | 0.041 | 0.535 | 0.163 | -2.845 | 0.004 | 0.294 | 0.974 |
| EOLA2       | 0.108  | 0.295 | 0.364  | 0.716 | 1.114 | 0.329 | 0.345  | 0.73  | 0.624 | 1.987 |
| EOLA1       | 0.029  | 0.295 | 0.097  | 0.923 | 1.029 | 0.304 | 0.095  | 0.924 | 0.577 | 1.836 |
| EOGT        | 0.019  | 0.297 | 0.063  | 0.949 | 1.019 | 0.302 | 0.063  | 0.95  | 0.57  | 1.823 |
| ENY2        | 1.115  | 0.328 | 3.402  | 0.001 | 3.048 | 0.999 | 2.051  | 0.04  | 1.604 | 5.793 |
| ENTR1       | 0.586  | 0.303 | 1.938  | 0.053 | 1.798 | 0.544 | 1.466  | 0.143 | 0.993 | 3.253 |
| ENTPD7      | -0.147 | 0.296 | -0.497 | 0.619 | 0.863 | 0.256 | -0.535 | 0.592 | 0.483 | 1.542 |
| ENTPD6      | 0.354  | 0.298 | 1.19   | 0.234 | 1.425 | 0.424 | 1.002  | 0.316 | 0.795 | 2.555 |
| ENTPD5      | -0.216 | 0.296 | -0.731 | 0.465 | 0.805 | 0.238 | -0.816 | 0.415 | 0.451 | 1.439 |
| ENTPD4      | -0.559 | 0.306 | -1.828 | 0.068 | 0.572 | 0.175 | -2.448 | 0.014 | 0.314 | 1.041 |
| ENTPD3      | -0.134 | 0.296 | -0.451 | 0.652 | 0.875 | 0.259 | -0.483 | 0.629 | 0.489 | 1.564 |
| ENTPD2      | 0.113  | 0.296 | 0.382  | 0.703 | 1.12  | 0.332 | 0.361  | 0.718 | 0.626 | 2.002 |
| ENTPD1-AS1  | 0.387  | 0.298 | 1.297  | 0.195 | 1.472 | 0.439 | 1.076  | 0.282 | 0.821 | 2.64  |
| ENTPD1      | -0.704 | 0.306 | -2.301 | 0.021 | 0.495 | 0.151 | -3.34  | 0.001 | 0.272 | 0.901 |
| ENSA        | -0.208 | 0.298 | -0.698 | 0.485 | 0.812 | 0.242 | -0.776 | 0.438 | 0.453 | 1.456 |
| ENPP4       | -0.043 | 0.295 | -0.146 | 0.884 | 0.958 | 0.283 | -0.149 | 0.881 | 0.537 | 1.709 |
| ENPP3       | 0.164  | 0.297 | 0.554  | 0.58  | 1.179 | 0.35  | 0.51   | 0.61  | 0.659 | 2.109 |
| ENPP2       | -0.639 | 0.304 | -2.103 | 0.035 | 0.528 | 0.16  | -2.945 | 0.003 | 0.291 | 0.957 |
| ENPP1       | 0.075  | 0.296 | 0.255  | 0.799 | 1.078 | 0.319 | 0.245  | 0.806 | 0.604 | 1.926 |
| ENPEP       | 0.182  | 0.295 | 0.615  | 0.539 | 1.199 | 0.354 | 0.562  | 0.574 | 0.672 | 2.14  |
| ENOX2       | -0.024 | 0.295 | -0.081 | 0.936 | 0.976 | 0.288 | -0.082 | 0.935 | 0.548 | 1.741 |

|         |        |       |        |       |       |       |        |       |       |       |
|---------|--------|-------|--------|-------|-------|-------|--------|-------|-------|-------|
| ENOX1   | 0.049  | 0.295 | 0.165  | 0.869 | 1.05  | 0.31  | 0.161  | 0.872 | 0.589 | 1.872 |
| ENOSF1  | 0.02   | 0.296 | 0.068  | 0.945 | 1.02  | 0.302 | 0.068  | 0.946 | 0.572 | 1.822 |
| ENOPH1  | 0.296  | 0.298 | 0.996  | 0.319 | 1.345 | 0.4   | 0.862  | 0.389 | 0.751 | 2.41  |
| ENO3    | 0.222  | 0.296 | 0.751  | 0.453 | 1.249 | 0.369 | 0.674  | 0.501 | 0.699 | 2.229 |
| ENO2    | 0.022  | 0.297 | 0.074  | 0.941 | 1.022 | 0.303 | 0.073  | 0.942 | 0.572 | 1.828 |
| ENO1    | 0.097  | 0.297 | 0.326  | 0.744 | 1.102 | 0.328 | 0.311  | 0.756 | 0.615 | 1.974 |
| ENGASE  | 0.143  | 0.299 | 0.478  | 0.633 | 1.154 | 0.345 | 0.446  | 0.656 | 0.642 | 2.073 |
| ENG     | -0.296 | 0.296 | -0.998 | 0.318 | 0.744 | 0.22  | -1.162 | 0.245 | 0.416 | 1.33  |
| ENDOU   | -0.511 | 0.303 | -1.688 | 0.091 | 0.6   | 0.182 | -2.203 | 0.028 | 0.332 | 1.086 |
| ENDOG   | 0.436  | 0.298 | 1.463  | 0.143 | 1.547 | 0.461 | 1.186  | 0.236 | 0.862 | 2.776 |
| ENDOD1  | -0.361 | 0.298 | -1.209 | 0.227 | 0.697 | 0.208 | -1.456 | 0.145 | 0.389 | 1.251 |
| ENC1    | 0.426  | 0.302 | 1.41   | 0.159 | 1.531 | 0.463 | 1.148  | 0.251 | 0.847 | 2.769 |
| ENAH    | -0.339 | 0.298 | -1.138 | 0.255 | 0.713 | 0.212 | -1.355 | 0.176 | 0.397 | 1.277 |
| EN2     | 0.072  | 0.295 | 0.245  | 0.806 | 1.075 | 0.317 | 0.237  | 0.813 | 0.603 | 1.917 |
| EN1     | 0.01   | 0.295 | 0.032  | 0.974 | 1.01  | 0.298 | 0.032  | 0.974 | 0.566 | 1.801 |
| EMX2    | -0.347 | 0.298 | -1.166 | 0.244 | 0.707 | 0.21  | -1.394 | 0.163 | 0.394 | 1.267 |
| EMX1    | 0.033  | 0.295 | 0.112  | 0.911 | 1.033 | 0.305 | 0.11   | 0.913 | 0.58  | 1.843 |
| EMSY    | 0.637  | 0.304 | 2.097  | 0.036 | 1.891 | 0.575 | 1.551  | 0.121 | 1.043 | 3.43  |
| EMP3    | -0.407 | 0.3   | -1.358 | 0.174 | 0.666 | 0.199 | -1.676 | 0.094 | 0.37  | 1.198 |
| EMP2    | 0.193  | 0.296 | 0.652  | 0.514 | 1.213 | 0.36  | 0.593  | 0.553 | 0.679 | 2.169 |
| EMP1    | -0.093 | 0.295 | -0.316 | 0.752 | 0.911 | 0.269 | -0.331 | 0.741 | 0.511 | 1.625 |
| EML4    | -0.773 | 0.309 | -2.503 | 0.012 | 0.461 | 0.143 | -3.777 | 0     | 0.252 | 0.846 |
| EML3    | -0.391 | 0.3   | -1.306 | 0.192 | 0.676 | 0.203 | -1.599 | 0.11  | 0.376 | 1.216 |
| EML2    | 0.029  | 0.295 | 0.097  | 0.922 | 1.029 | 0.304 | 0.096  | 0.924 | 0.577 | 1.835 |
| EML1    | -0.602 | 0.304 | -1.98  | 0.048 | 0.548 | 0.166 | -2.716 | 0.007 | 0.302 | 0.994 |
| EMILIN2 | 0.195  | 0.299 | 0.653  | 0.514 | 1.215 | 0.363 | 0.593  | 0.553 | 0.677 | 2.183 |
| EMILIN1 | -0.54  | 0.301 | -1.795 | 0.073 | 0.583 | 0.175 | -2.381 | 0.017 | 0.323 | 1.051 |
| EMID1   | 0.895  | 0.315 | 2.841  | 0.004 | 2.448 | 0.771 | 1.877  | 0.06  | 1.32  | 4.539 |
| EMG1    | 0.261  | 0.298 | 0.878  | 0.38  | 1.299 | 0.387 | 0.772  | 0.44  | 0.725 | 2.327 |
| EMD     | 0.649  | 0.303 | 2.141  | 0.032 | 1.914 | 0.58  | 1.575  | 0.115 | 1.056 | 3.467 |
| EMCN    | -0.558 | 0.302 | -1.845 | 0.065 | 0.572 | 0.173 | -2.47  | 0.014 | 0.316 | 1.036 |
| EMC9    | 0.869  | 0.31  | 2.803  | 0.005 | 2.386 | 0.74  | 1.872  | 0.061 | 1.299 | 4.382 |
| EMC8    | 0.977  | 0.315 | 3.099  | 0.002 | 2.657 | 0.838 | 1.978  | 0.048 | 1.432 | 4.93  |
| EMC7    | -0.142 | 0.297 | -0.478 | 0.633 | 0.868 | 0.258 | -0.513 | 0.608 | 0.485 | 1.553 |
| EMC6    | 1.047  | 0.317 | 3.304  | 0.001 | 2.849 | 0.903 | 2.048  | 0.041 | 1.531 | 5.302 |
| EMC3    | 0.001  | 0.295 | 0.002  | 0.998 | 1.001 | 0.296 | 0.002  | 0.998 | 0.561 | 1.785 |
| EMC2    | 0.489  | 0.302 | 1.619  | 0.106 | 1.631 | 0.493 | 1.28   | 0.201 | 0.902 | 2.951 |
| EMC10   | 0.12   | 0.296 | 0.406  | 0.685 | 1.128 | 0.334 | 0.382  | 0.702 | 0.631 | 2.014 |



|          |        |       |        |       |       |       |        |       |       |       |
|----------|--------|-------|--------|-------|-------|-------|--------|-------|-------|-------|
| EMC1     | 0.049  | 0.296 | 0.165  | 0.869 | 1.05  | 0.31  | 0.161  | 0.872 | 0.588 | 1.875 |
| ELSPBP1  | -0.043 | 0.296 | -0.144 | 0.886 | 0.958 | 0.283 | -0.147 | 0.883 | 0.537 | 1.71  |
| ELP6     | 0.299  | 0.298 | 1.006  | 0.315 | 1.349 | 0.401 | 0.869  | 0.385 | 0.753 | 2.417 |
| ELP5     | -0.67  | 0.31  | -2.163 | 0.031 | 0.512 | 0.159 | -3.08  | 0.002 | 0.279 | 0.939 |
| ELP4     | 0.374  | 0.298 | 1.257  | 0.209 | 1.454 | 0.433 | 1.048  | 0.294 | 0.811 | 2.605 |
| ELP3     | -0.409 | 0.303 | -1.352 | 0.176 | 0.664 | 0.201 | -1.67  | 0.095 | 0.367 | 1.202 |
| ELP1     | 0.154  | 0.295 | 0.52   | 0.603 | 1.166 | 0.345 | 0.482  | 0.63  | 0.653 | 2.081 |
| ELOVL6   | 0.481  | 0.303 | 1.59   | 0.112 | 1.618 | 0.489 | 1.262  | 0.207 | 0.894 | 2.927 |
| ELOVL5   | -0.501 | 0.306 | -1.636 | 0.102 | 0.606 | 0.185 | -2.124 | 0.034 | 0.333 | 1.104 |
| ELOVL4   | -0.3   | 0.3   | -0.999 | 0.318 | 0.741 | 0.222 | -1.165 | 0.244 | 0.412 | 1.334 |
| ELOVL2   | -0.144 | 0.296 | -0.486 | 0.627 | 0.866 | 0.257 | -0.523 | 0.601 | 0.484 | 1.548 |
| ELOC     | 0.626  | 0.306 | 2.049  | 0.04  | 1.87  | 0.572 | 1.523  | 0.128 | 1.027 | 3.404 |
| ELOB     | 0.371  | 0.298 | 1.243  | 0.214 | 1.449 | 0.432 | 1.039  | 0.299 | 0.807 | 2.601 |
| ELOA2    | 0.555  | 0.306 | 1.818  | 0.069 | 1.743 | 0.532 | 1.395  | 0.163 | 0.958 | 3.172 |
| ELOA-AS1 | -0.32  | 0.3   | -1.066 | 0.286 | 0.726 | 0.218 | -1.256 | 0.209 | 0.403 | 1.308 |
| ELOA     | -0.287 | 0.298 | -0.964 | 0.335 | 0.751 | 0.223 | -1.117 | 0.264 | 0.419 | 1.345 |
| ELN      | -0.723 | 0.31  | -2.331 | 0.02  | 0.485 | 0.15  | -3.419 | 0.001 | 0.264 | 0.891 |
| ELMO3    | 0.616  | 0.303 | 2.031  | 0.042 | 1.851 | 0.561 | 1.516  | 0.129 | 1.022 | 3.354 |
| ELMO2    | 0.231  | 0.298 | 0.774  | 0.439 | 1.259 | 0.375 | 0.691  | 0.489 | 0.702 | 2.258 |
| ELMO1    | -0.506 | 0.3   | -1.687 | 0.092 | 0.603 | 0.181 | -2.196 | 0.028 | 0.335 | 1.085 |
| ELL3     | 0.382  | 0.297 | 1.287  | 0.198 | 1.465 | 0.434 | 1.07   | 0.285 | 0.819 | 2.62  |
| ELL2     | -0.147 | 0.296 | -0.496 | 0.62  | 0.863 | 0.256 | -0.534 | 0.593 | 0.483 | 1.543 |
| ELL      | -0.468 | 0.302 | -1.549 | 0.121 | 0.626 | 0.189 | -1.976 | 0.048 | 0.346 | 1.132 |
| ELK4     | 0.071  | 0.297 | 0.239  | 0.811 | 1.073 | 0.318 | 0.231  | 0.818 | 0.6   | 1.92  |
| ELK3     | -0.81  | 0.311 | -2.61  | 0.009 | 0.445 | 0.138 | -4.022 | 0     | 0.242 | 0.817 |
| ELK2AP   | -0.08  | 0.296 | -0.272 | 0.786 | 0.923 | 0.273 | -0.283 | 0.777 | 0.517 | 1.647 |
| ELK1     | 0.251  | 0.296 | 0.848  | 0.397 | 1.286 | 0.381 | 0.75   | 0.453 | 0.719 | 2.297 |
| ELF5     | 0.064  | 0.296 | 0.217  | 0.828 | 1.066 | 0.315 | 0.21   | 0.834 | 0.597 | 1.903 |
| ELF4     | 0.229  | 0.297 | 0.773  | 0.44  | 1.258 | 0.373 | 0.691  | 0.49  | 0.703 | 2.25  |
| ELF3     | 0.136  | 0.295 | 0.462  | 0.644 | 1.146 | 0.339 | 0.432  | 0.666 | 0.642 | 2.045 |
| ELF2     | 0.245  | 0.296 | 0.826  | 0.409 | 1.277 | 0.378 | 0.732  | 0.464 | 0.715 | 2.282 |
| ELF1     | -0.3   | 0.298 | -1.005 | 0.315 | 0.741 | 0.221 | -1.172 | 0.241 | 0.413 | 1.329 |
| ELAVL4   | 0.027  | 0.295 | 0.09   | 0.928 | 1.027 | 0.303 | 0.089  | 0.929 | 0.576 | 1.831 |
| ELAVL3   | 0.732  | 0.307 | 2.381  | 0.017 | 2.079 | 0.639 | 1.689  | 0.091 | 1.138 | 3.796 |
| ELAVL2   | 0.271  | 0.298 | 0.911  | 0.362 | 1.312 | 0.39  | 0.798  | 0.425 | 0.732 | 2.35  |
| ELAVL1   | 0.939  | 0.321 | 2.927  | 0.003 | 2.557 | 0.82  | 1.899  | 0.058 | 1.364 | 4.794 |
| ELAPOR1  | -0.621 | 0.31  | -2.003 | 0.045 | 0.537 | 0.167 | -2.776 | 0.006 | 0.293 | 0.987 |
| ELANE    | 0.635  | 0.306 | 2.079  | 0.038 | 1.887 | 0.577 | 1.539  | 0.124 | 1.037 | 3.436 |

|           |        |       |        |       |       |       |        |       |       |       |
|-----------|--------|-------|--------|-------|-------|-------|--------|-------|-------|-------|
| ELAC2     | -0.079 | 0.295 | -0.267 | 0.789 | 0.924 | 0.273 | -0.278 | 0.781 | 0.518 | 1.649 |
| ELAC1     | -0.139 | 0.296 | -0.469 | 0.639 | 0.87  | 0.258 | -0.503 | 0.615 | 0.487 | 1.556 |
| EIPR1     | 0.248  | 0.299 | 0.83   | 0.406 | 1.281 | 0.382 | 0.735  | 0.462 | 0.714 | 2.3   |
| EIF6      | 0.238  | 0.296 | 0.803  | 0.422 | 1.268 | 0.376 | 0.715  | 0.475 | 0.71  | 2.266 |
| EIF5B     | 0.05   | 0.297 | 0.167  | 0.867 | 1.051 | 0.312 | 0.163  | 0.87  | 0.587 | 1.881 |
| EIF5A2    | 0.378  | 0.3   | 1.262  | 0.207 | 1.46  | 0.437 | 1.051  | 0.293 | 0.811 | 2.625 |
| EIF5A     | 0.028  | 0.296 | 0.095  | 0.924 | 1.029 | 0.304 | 0.094  | 0.925 | 0.576 | 1.836 |
| EIF5      | 0.69   | 0.306 | 2.253  | 0.024 | 1.994 | 0.611 | 1.627  | 0.104 | 1.094 | 3.636 |
| EIF4H     | -0.128 | 0.299 | -0.429 | 0.668 | 0.88  | 0.263 | -0.458 | 0.647 | 0.49  | 1.58  |
| EIF4G3    | -0.338 | 0.3   | -1.126 | 0.26  | 0.713 | 0.214 | -1.339 | 0.181 | 0.396 | 1.284 |
| EIF4G2    | 0.004  | 0.297 | 0.014  | 0.989 | 1.004 | 0.298 | 0.014  | 0.989 | 0.561 | 1.796 |
| EIF4G1    | 0.336  | 0.3   | 1.12   | 0.263 | 1.399 | 0.419 | 0.951  | 0.342 | 0.777 | 2.518 |
| EIF4ENIF1 | -0.186 | 0.298 | -0.624 | 0.532 | 0.83  | 0.247 | -0.686 | 0.493 | 0.463 | 1.488 |
| EIF4EBP2  | -0.139 | 0.296 | -0.47  | 0.639 | 0.87  | 0.258 | -0.504 | 0.614 | 0.487 | 1.554 |
| EIF4EBP1  | 0.25   | 0.296 | 0.847  | 0.397 | 1.284 | 0.38  | 0.749  | 0.454 | 0.72  | 2.293 |
| EIF4E2    | 0.626  | 0.303 | 2.065  | 0.039 | 1.87  | 0.567 | 1.535  | 0.125 | 1.032 | 3.389 |
| EIF4E     | 0.472  | 0.3   | 1.576  | 0.115 | 1.604 | 0.481 | 1.256  | 0.209 | 0.891 | 2.886 |
| EIF4B     | -0.738 | 0.31  | -2.378 | 0.017 | 0.478 | 0.148 | -3.518 | 0     | 0.26  | 0.878 |
| EIF4A3    | 0.502  | 0.3   | 1.674  | 0.094 | 1.653 | 0.496 | 1.316  | 0.188 | 0.918 | 2.976 |
| EIF3M     | -0.05  | 0.298 | -0.167 | 0.868 | 0.952 | 0.283 | -0.171 | 0.864 | 0.531 | 1.706 |
| EIF3L     | -0.596 | 0.303 | -1.97  | 0.049 | 0.551 | 0.167 | -2.695 | 0.007 | 0.304 | 0.997 |
| EIF3K     | -0.447 | 0.302 | -1.479 | 0.139 | 0.639 | 0.193 | -1.866 | 0.062 | 0.354 | 1.156 |
| EIF3J     | 0.112  | 0.296 | 0.378  | 0.705 | 1.118 | 0.331 | 0.358  | 0.72  | 0.626 | 1.997 |
| EIF3I     | -0.109 | 0.296 | -0.367 | 0.714 | 0.897 | 0.266 | -0.388 | 0.698 | 0.502 | 1.603 |
| EIF3H     | -0.084 | 0.296 | -0.283 | 0.777 | 0.92  | 0.272 | -0.295 | 0.768 | 0.515 | 1.643 |
| EIF3G     | -0.287 | 0.298 | -0.964 | 0.335 | 0.751 | 0.223 | -1.117 | 0.264 | 0.419 | 1.345 |
| EIF3F     | 0.168  | 0.296 | 0.567  | 0.571 | 1.183 | 0.351 | 0.522  | 0.602 | 0.662 | 2.114 |
| EIF3E     | 0.171  | 0.296 | 0.576  | 0.565 | 1.186 | 0.351 | 0.529  | 0.596 | 0.664 | 2.119 |
| EIF3D     | -0.429 | 0.3   | -1.429 | 0.153 | 0.651 | 0.195 | -1.784 | 0.074 | 0.362 | 1.172 |
| EIF3B     | 0.307  | 0.301 | 1.02   | 0.308 | 1.359 | 0.409 | 0.878  | 0.38  | 0.754 | 2.45  |
| EIF3A     | -0.268 | 0.297 | -0.902 | 0.367 | 0.765 | 0.227 | -1.035 | 0.301 | 0.427 | 1.369 |
| EIF2S3    | 0.021  | 0.295 | 0.071  | 0.944 | 1.021 | 0.301 | 0.07   | 0.944 | 0.573 | 1.82  |
| EIF2S2    | 0.215  | 0.296 | 0.727  | 0.468 | 1.24  | 0.367 | 0.654  | 0.513 | 0.694 | 2.217 |
| EIF2S1    | 0.597  | 0.303 | 1.973  | 0.049 | 1.817 | 0.55  | 1.485  | 0.137 | 1.004 | 3.288 |
| EIF2D     | 0.311  | 0.298 | 1.045  | 0.296 | 1.365 | 0.407 | 0.898  | 0.369 | 0.762 | 2.447 |
| EIF2B5    | 0.725  | 0.31  | 2.34   | 0.019 | 2.064 | 0.639 | 1.665  | 0.096 | 1.125 | 3.789 |
| EIF2B4    | -0.542 | 0.306 | -1.775 | 0.076 | 0.581 | 0.178 | -2.356 | 0.018 | 0.319 | 1.058 |
| EIF2B3    | -0.399 | 0.302 | -1.319 | 0.187 | 0.671 | 0.203 | -1.621 | 0.105 | 0.371 | 1.214 |

|         |        |       |        |       |       |       |        |       |       |       |
|---------|--------|-------|--------|-------|-------|-------|--------|-------|-------|-------|
| EIF2B2  | 0.244  | 0.296 | 0.823  | 0.411 | 1.276 | 0.378 | 0.73   | 0.465 | 0.714 | 2.281 |
| EIF2B1  | -0.342 | 0.3   | -1.141 | 0.254 | 0.71  | 0.213 | -1.361 | 0.174 | 0.395 | 1.278 |
| EIF2AK3 | -0.469 | 0.3   | -1.565 | 0.118 | 0.626 | 0.188 | -1.996 | 0.046 | 0.348 | 1.126 |
| EIF2AK2 | -0.197 | 0.296 | -0.664 | 0.507 | 0.822 | 0.243 | -0.733 | 0.463 | 0.46  | 1.468 |
| EIF2AK1 | -0.234 | 0.298 | -0.786 | 0.432 | 0.792 | 0.236 | -0.885 | 0.376 | 0.442 | 1.418 |
| EIF1B   | 0.275  | 0.297 | 0.926  | 0.355 | 1.317 | 0.392 | 0.809  | 0.418 | 0.735 | 2.359 |
| EIF1AY  | 0.135  | 0.296 | 0.457  | 0.648 | 1.145 | 0.338 | 0.427  | 0.669 | 0.641 | 2.043 |
| EIF1AX  | 0.392  | 0.301 | 1.305  | 0.192 | 1.481 | 0.445 | 1.079  | 0.281 | 0.821 | 2.67  |
| EIF1    | 0.591  | 0.303 | 1.953  | 0.051 | 1.806 | 0.547 | 1.474  | 0.14  | 0.998 | 3.27  |
| EID1    | -0.338 | 0.3   | -1.126 | 0.26  | 0.713 | 0.214 | -1.34  | 0.18  | 0.396 | 1.284 |
| EI24    | 0.398  | 0.3   | 1.324  | 0.186 | 1.488 | 0.447 | 1.092  | 0.275 | 0.826 | 2.682 |
| EHMT2   | -0.444 | 0.3   | -1.48  | 0.139 | 0.641 | 0.192 | -1.863 | 0.062 | 0.356 | 1.155 |
| EHMT1   | -0.032 | 0.296 | -0.108 | 0.914 | 0.969 | 0.287 | -0.11  | 0.913 | 0.542 | 1.731 |
| EHHADH  | -0.041 | 0.296 | -0.139 | 0.889 | 0.96  | 0.284 | -0.142 | 0.887 | 0.537 | 1.714 |
| EHF     | 0.217  | 0.296 | 0.731  | 0.465 | 1.242 | 0.368 | 0.657  | 0.511 | 0.695 | 2.219 |
| EHD4    | -0.056 | 0.295 | -0.19  | 0.849 | 0.945 | 0.279 | -0.196 | 0.845 | 0.53  | 1.687 |
| EHD3    | -0.528 | 0.3   | -1.759 | 0.079 | 0.59  | 0.177 | -2.317 | 0.021 | 0.328 | 1.062 |
| EHD2    | -0.483 | 0.302 | -1.598 | 0.11  | 0.617 | 0.186 | -2.054 | 0.04  | 0.341 | 1.116 |
| EHD1    | 0.299  | 0.298 | 1.003  | 0.316 | 1.348 | 0.402 | 0.867  | 0.386 | 0.752 | 2.418 |
| EHBP1L1 | -0.528 | 0.303 | -1.745 | 0.081 | 0.59  | 0.179 | -2.299 | 0.022 | 0.326 | 1.067 |
| EHBP1   | 0.159  | 0.295 | 0.538  | 0.591 | 1.172 | 0.346 | 0.498  | 0.619 | 0.657 | 2.092 |
| EGR4    | 0.034  | 0.295 | 0.114  | 0.909 | 1.034 | 0.305 | 0.112  | 0.91  | 0.58  | 1.844 |
| EGR3    | -0.286 | 0.3   | -0.954 | 0.34  | 0.751 | 0.225 | -1.104 | 0.27  | 0.418 | 1.352 |
| EGR2    | -0.099 | 0.295 | -0.336 | 0.737 | 0.906 | 0.267 | -0.353 | 0.724 | 0.508 | 1.616 |
| EGR1    | -0.058 | 0.295 | -0.197 | 0.844 | 0.944 | 0.279 | -0.202 | 0.84  | 0.529 | 1.683 |
| EGOT    | -0.27  | 0.3   | -0.898 | 0.369 | 0.764 | 0.229 | -1.031 | 0.303 | 0.424 | 1.375 |
| EGLN3   | -0.142 | 0.297 | -0.477 | 0.634 | 0.868 | 0.258 | -0.512 | 0.609 | 0.485 | 1.554 |
| EGLN1   | 0.264  | 0.298 | 0.884  | 0.377 | 1.302 | 0.388 | 0.777  | 0.437 | 0.725 | 2.336 |
| EGFR    | 0.202  | 0.298 | 0.676  | 0.499 | 1.223 | 0.364 | 0.613  | 0.54  | 0.682 | 2.193 |
| EGFL7   | -0.061 | 0.295 | -0.206 | 0.837 | 0.941 | 0.278 | -0.212 | 0.832 | 0.528 | 1.679 |
| EGFL6   | -0.11  | 0.296 | -0.37  | 0.711 | 0.896 | 0.266 | -0.391 | 0.695 | 0.501 | 1.602 |
| EGF     | -0.278 | 0.298 | -0.932 | 0.351 | 0.758 | 0.226 | -1.075 | 0.283 | 0.423 | 1.358 |
| EFS     | 0.07   | 0.295 | 0.238  | 0.812 | 1.073 | 0.317 | 0.229  | 0.819 | 0.601 | 1.913 |
| EFR3B   | 0.183  | 0.298 | 0.615  | 0.538 | 1.201 | 0.358 | 0.562  | 0.574 | 0.67  | 2.154 |
| EFR3A   | 0.098  | 0.297 | 0.33   | 0.741 | 1.103 | 0.328 | 0.314  | 0.753 | 0.616 | 1.975 |
| EFNB3   | -0.054 | 0.296 | -0.183 | 0.855 | 0.947 | 0.28  | -0.188 | 0.851 | 0.531 | 1.691 |
| EFNB2   | 0.011  | 0.295 | 0.039  | 0.969 | 1.012 | 0.299 | 0.039  | 0.969 | 0.567 | 1.805 |
| EFNB1   | 0.52   | 0.306 | 1.701  | 0.089 | 1.682 | 0.514 | 1.327  | 0.185 | 0.924 | 3.063 |

|           |        |       |        |       |       |       |        |       |       |       |
|-----------|--------|-------|--------|-------|-------|-------|--------|-------|-------|-------|
| EFNA5     | 0.194  | 0.298 | 0.652  | 0.514 | 1.214 | 0.361 | 0.593  | 0.553 | 0.678 | 2.176 |
| EFNA4     | -0.077 | 0.295 | -0.259 | 0.795 | 0.926 | 0.273 | -0.269 | 0.788 | 0.519 | 1.652 |
| EFNA3     | -0.154 | 0.296 | -0.519 | 0.604 | 0.857 | 0.254 | -0.561 | 0.575 | 0.48  | 1.533 |
| EFNA2     | 0.54   | 0.303 | 1.782  | 0.075 | 1.715 | 0.519 | 1.377  | 0.168 | 0.948 | 3.105 |
| EFNA1     | 0.208  | 0.297 | 0.7    | 0.484 | 1.231 | 0.365 | 0.632  | 0.527 | 0.688 | 2.201 |
| EFL1      | -0.052 | 0.297 | -0.176 | 0.861 | 0.949 | 0.282 | -0.18  | 0.857 | 0.53  | 1.7   |
| EFHD2     | -0.546 | 0.303 | -1.803 | 0.071 | 0.579 | 0.175 | -2.398 | 0.016 | 0.32  | 1.049 |
| EFHD1     | -0.315 | 0.3   | -1.052 | 0.293 | 0.73  | 0.219 | -1.237 | 0.216 | 0.406 | 1.312 |
| EFHC2     | 0.318  | 0.298 | 1.068  | 0.286 | 1.374 | 0.409 | 0.915  | 0.36  | 0.767 | 2.462 |
| EFHC1     | -0.113 | 0.295 | -0.383 | 0.701 | 0.893 | 0.264 | -0.406 | 0.685 | 0.5   | 1.593 |
| EFEMP2    | -0.321 | 0.298 | -1.08  | 0.28  | 0.725 | 0.216 | -1.273 | 0.203 | 0.405 | 1.3   |
| EFEMP1    | -0.187 | 0.296 | -0.63  | 0.529 | 0.83  | 0.246 | -0.693 | 0.489 | 0.464 | 1.483 |
| EFCC1     | -0.774 | 0.31  | -2.498 | 0.012 | 0.461 | 0.143 | -3.771 | 0     | 0.251 | 0.846 |
| EFCAB6    | -0.523 | 0.306 | -1.711 | 0.087 | 0.593 | 0.181 | -2.249 | 0.025 | 0.325 | 1.079 |
| EFCAB2    | 0.057  | 0.297 | 0.191  | 0.849 | 1.058 | 0.314 | 0.185  | 0.853 | 0.592 | 1.893 |
| EFCAB14   | -0.467 | 0.302 | -1.547 | 0.122 | 0.627 | 0.189 | -1.972 | 0.049 | 0.347 | 1.133 |
| EFCAB11   | 0.23   | 0.296 | 0.778  | 0.436 | 1.259 | 0.372 | 0.695  | 0.487 | 0.705 | 2.248 |
| EFCAB1    | 0.338  | 0.298 | 1.136  | 0.256 | 1.403 | 0.418 | 0.964  | 0.335 | 0.782 | 2.515 |
| EEF2KMT   | -0.134 | 0.297 | -0.45  | 0.652 | 0.875 | 0.259 | -0.482 | 0.63  | 0.489 | 1.565 |
| EEF2      | -0.502 | 0.3   | -1.671 | 0.095 | 0.605 | 0.182 | -2.17  | 0.03  | 0.336 | 1.091 |
| EEF1E1    | 0.874  | 0.311 | 2.811  | 0.005 | 2.396 | 0.745 | 1.874  | 0.061 | 1.303 | 4.408 |
| EEF1D     | 0.033  | 0.295 | 0.113  | 0.91  | 1.034 | 0.305 | 0.111  | 0.911 | 0.58  | 1.844 |
| EEF1AKNMT | 0.738  | 0.31  | 2.378  | 0.017 | 2.091 | 0.649 | 1.682  | 0.093 | 1.138 | 3.841 |
| EEF1AKMT3 | -0.787 | 0.315 | -2.501 | 0.012 | 0.455 | 0.143 | -3.804 | 0     | 0.246 | 0.843 |
| EEF1AKMT2 | -0.127 | 0.299 | -0.426 | 0.67  | 0.88  | 0.263 | -0.455 | 0.649 | 0.49  | 1.581 |
| EEF1A2    | 0.271  | 0.296 | 0.915  | 0.36  | 1.311 | 0.389 | 0.801  | 0.423 | 0.734 | 2.344 |
| EEF1A1    | -0.265 | 0.299 | -0.889 | 0.374 | 0.767 | 0.229 | -1.018 | 0.309 | 0.427 | 1.377 |
| EED       | 0.342  | 0.298 | 1.15   | 0.25  | 1.408 | 0.419 | 0.974  | 0.33  | 0.786 | 2.524 |
| EEA1      | 0.574  | 0.302 | 1.899  | 0.058 | 1.776 | 0.537 | 1.445  | 0.149 | 0.982 | 3.212 |
| EDRF1     | 0.431  | 0.3   | 1.438  | 0.15  | 1.539 | 0.461 | 1.168  | 0.243 | 0.855 | 2.767 |
| EDNRB     | -0.137 | 0.295 | -0.464 | 0.642 | 0.872 | 0.258 | -0.498 | 0.619 | 0.489 | 1.555 |
| EDNRA     | -0.621 | 0.306 | -2.03  | 0.042 | 0.537 | 0.164 | -2.815 | 0.005 | 0.295 | 0.979 |
| EDN3      | 0.147  | 0.295 | 0.497  | 0.619 | 1.158 | 0.342 | 0.463  | 0.644 | 0.649 | 2.067 |
| EDN2      | -0.526 | 0.306 | -1.717 | 0.086 | 0.591 | 0.181 | -2.258 | 0.024 | 0.324 | 1.077 |
| EDN1      | -0.071 | 0.296 | -0.239 | 0.811 | 0.932 | 0.275 | -0.248 | 0.804 | 0.522 | 1.663 |
| EDIL3     | -0.013 | 0.296 | -0.043 | 0.965 | 0.987 | 0.292 | -0.044 | 0.965 | 0.553 | 1.763 |
| EDF1      | -0.583 | 0.306 | -1.904 | 0.057 | 0.558 | 0.171 | -2.585 | 0.01  | 0.307 | 1.017 |
| EDEM3     | -0.093 | 0.295 | -0.316 | 0.752 | 0.911 | 0.269 | -0.331 | 0.741 | 0.51  | 1.625 |

|        |        |       |        |       |       |       |        |       |       |       |
|--------|--------|-------|--------|-------|-------|-------|--------|-------|-------|-------|
| EDEM2  | 0.03   | 0.295 | 0.1    | 0.92  | 1.03  | 0.304 | 0.099  | 0.921 | 0.577 | 1.837 |
| EDEM1  | -0.295 | 0.297 | -0.993 | 0.321 | 0.745 | 0.221 | -1.155 | 0.248 | 0.416 | 1.333 |
| EDDM3B | 0.353  | 0.298 | 1.186  | 0.236 | 1.424 | 0.424 | 0.999  | 0.318 | 0.794 | 2.553 |
| EDDM3A | -0.214 | 0.296 | -0.722 | 0.47  | 0.807 | 0.239 | -0.806 | 0.42  | 0.452 | 1.443 |
| EDC4   | 0.274  | 0.298 | 0.918  | 0.358 | 1.315 | 0.392 | 0.803  | 0.422 | 0.733 | 2.358 |
| EDC3   | -0.339 | 0.303 | -1.12  | 0.263 | 0.712 | 0.216 | -1.334 | 0.182 | 0.393 | 1.29  |
| EDAR   | -0.116 | 0.296 | -0.392 | 0.695 | 0.89  | 0.264 | -0.416 | 0.678 | 0.498 | 1.591 |
| EDA2R  | -0.443 | 0.3   | -1.477 | 0.14  | 0.642 | 0.193 | -1.858 | 0.063 | 0.357 | 1.156 |
| EDA    | 0.631  | 0.31  | 2.036  | 0.042 | 1.88  | 0.583 | 1.51   | 0.131 | 1.024 | 3.452 |
| ECT2   | 0.963  | 0.321 | 3.002  | 0.003 | 2.618 | 0.84  | 1.928  | 0.054 | 1.397 | 4.909 |
| ECSIT  | -0.493 | 0.306 | -1.612 | 0.107 | 0.611 | 0.187 | -2.084 | 0.037 | 0.335 | 1.112 |
| ECRP   | 0.159  | 0.296 | 0.536  | 0.592 | 1.172 | 0.347 | 0.495  | 0.62  | 0.656 | 2.093 |
| ECPAS  | 0.229  | 0.298 | 0.767  | 0.443 | 1.257 | 0.375 | 0.686  | 0.493 | 0.7   | 2.257 |
| ECM2   | -0.484 | 0.3   | -1.613 | 0.107 | 0.616 | 0.185 | -2.074 | 0.038 | 0.342 | 1.11  |
| ECM1   | -0.312 | 0.3   | -1.04  | 0.299 | 0.732 | 0.22  | -1.22  | 0.222 | 0.407 | 1.318 |
| ECI2   | -0.493 | 0.306 | -1.612 | 0.107 | 0.611 | 0.187 | -2.084 | 0.037 | 0.335 | 1.112 |
| ECI1   | -0.253 | 0.3   | -0.844 | 0.398 | 0.776 | 0.233 | -0.961 | 0.337 | 0.431 | 1.398 |
| ECHS1  | 0.312  | 0.296 | 1.053  | 0.293 | 1.366 | 0.405 | 0.904  | 0.366 | 0.764 | 2.443 |
| ECHDC3 | 0.893  | 0.316 | 2.831  | 0.005 | 2.443 | 0.771 | 1.872  | 0.061 | 1.316 | 4.535 |
| ECHDC2 | -0.206 | 0.298 | -0.692 | 0.489 | 0.814 | 0.242 | -0.769 | 0.442 | 0.454 | 1.458 |
| ECHDC1 | -0.017 | 0.296 | -0.056 | 0.955 | 0.984 | 0.291 | -0.056 | 0.955 | 0.551 | 1.756 |
| ECH1   | 0.394  | 0.3   | 1.314  | 0.189 | 1.482 | 0.444 | 1.086  | 0.277 | 0.824 | 2.667 |
| ECEL1  | 0.136  | 0.295 | 0.46   | 0.645 | 1.146 | 0.339 | 0.431  | 0.667 | 0.642 | 2.045 |
| ECE2   | -0.281 | 0.298 | -0.943 | 0.345 | 0.755 | 0.225 | -1.089 | 0.276 | 0.421 | 1.353 |
| ECE1   | 0.04   | 0.296 | 0.136  | 0.892 | 1.041 | 0.308 | 0.133  | 0.894 | 0.583 | 1.859 |
| ECD    | -0.273 | 0.3   | -0.909 | 0.363 | 0.761 | 0.229 | -1.046 | 0.296 | 0.422 | 1.371 |
| EBP    | 0.397  | 0.298 | 1.331  | 0.183 | 1.487 | 0.443 | 1.098  | 0.272 | 0.829 | 2.667 |
| EBLN2  | 0.121  | 0.296 | 0.408  | 0.683 | 1.129 | 0.335 | 0.384  | 0.701 | 0.631 | 2.018 |
| EBI3   | -0.412 | 0.304 | -1.358 | 0.175 | 0.662 | 0.201 | -1.68  | 0.093 | 0.365 | 1.201 |
| EBF2   | -0.304 | 0.297 | -1.024 | 0.306 | 0.738 | 0.219 | -1.197 | 0.231 | 0.412 | 1.32  |
| EBAG9  | 0.444  | 0.3   | 1.482  | 0.138 | 1.559 | 0.467 | 1.196  | 0.232 | 0.866 | 2.805 |
| EAPP   | -0.279 | 0.302 | -0.924 | 0.356 | 0.756 | 0.229 | -1.065 | 0.287 | 0.418 | 1.368 |
| EAF2   | -0.323 | 0.298 | -1.085 | 0.278 | 0.724 | 0.216 | -1.28  | 0.201 | 0.404 | 1.298 |
| E4F1   | 0.088  | 0.295 | 0.298  | 0.765 | 1.092 | 0.323 | 0.286  | 0.775 | 0.612 | 1.949 |
| E2F8   | 0.598  | 0.306 | 1.958  | 0.05  | 1.819 | 0.556 | 1.473  | 0.141 | 0.999 | 3.311 |
| E2F6   | 0.201  | 0.296 | 0.68   | 0.496 | 1.223 | 0.362 | 0.616  | 0.538 | 0.685 | 2.184 |
| E2F5   | 0.516  | 0.303 | 1.705  | 0.088 | 1.675 | 0.507 | 1.332  | 0.183 | 0.926 | 3.032 |
| E2F4   | 0.214  | 0.298 | 0.717  | 0.473 | 1.239 | 0.369 | 0.646  | 0.518 | 0.69  | 2.222 |

|          |        |       |        |       |       |       |        |       |       |       |
|----------|--------|-------|--------|-------|-------|-------|--------|-------|-------|-------|
| E2F3     | 1.108  | 0.336 | 3.296  | 0.001 | 3.028 | 1.018 | 1.992  | 0.046 | 1.567 | 5.852 |
| E2F2     | 0.205  | 0.296 | 0.691  | 0.49  | 1.227 | 0.364 | 0.625  | 0.532 | 0.686 | 2.194 |
| E2F1     | 0.539  | 0.307 | 1.758  | 0.079 | 1.715 | 0.526 | 1.359  | 0.174 | 0.94  | 3.129 |
| DZIP3    | -0.278 | 0.298 | -0.932 | 0.351 | 0.758 | 0.226 | -1.074 | 0.283 | 0.422 | 1.358 |
| DZIP1    | -0.439 | 0.3   | -1.463 | 0.143 | 0.645 | 0.193 | -1.836 | 0.066 | 0.358 | 1.161 |
| DZANK1   | 0.011  | 0.295 | 0.036  | 0.971 | 1.011 | 0.298 | 0.036  | 0.971 | 0.567 | 1.803 |
| DYSF     | -0.32  | 0.299 | -1.069 | 0.285 | 0.726 | 0.217 | -1.26  | 0.208 | 0.404 | 1.305 |
| DYRK4    | 0.253  | 0.297 | 0.852  | 0.394 | 1.288 | 0.382 | 0.753  | 0.452 | 0.72  | 2.304 |
| DYRK3    | 0.557  | 0.301 | 1.853  | 0.064 | 1.746 | 0.525 | 1.421  | 0.155 | 0.968 | 3.147 |
| DYRK2    | 0.616  | 0.306 | 2.014  | 0.044 | 1.852 | 0.566 | 1.504  | 0.133 | 1.017 | 3.372 |
| DYRK1B   | 0.07   | 0.295 | 0.237  | 0.813 | 1.072 | 0.317 | 0.228  | 0.819 | 0.601 | 1.913 |
| DYRK1A   | 0.1    | 0.296 | 0.338  | 0.735 | 1.105 | 0.327 | 0.322  | 0.748 | 0.619 | 1.974 |
| DYNLT3   | -0.202 | 0.301 | -0.673 | 0.501 | 0.817 | 0.246 | -0.746 | 0.456 | 0.453 | 1.473 |
| DYNLT1   | 0.132  | 0.296 | 0.444  | 0.657 | 1.141 | 0.338 | 0.416  | 0.677 | 0.638 | 2.039 |
| DYNLRB1  | -0.083 | 0.295 | -0.282 | 0.778 | 0.92  | 0.272 | -0.294 | 0.769 | 0.516 | 1.642 |
| DYNLL1   | 0.224  | 0.296 | 0.755  | 0.45  | 1.251 | 0.371 | 0.676  | 0.499 | 0.7   | 2.235 |
| DYNC2LI1 | 0.229  | 0.297 | 0.771  | 0.441 | 1.257 | 0.374 | 0.689  | 0.491 | 0.702 | 2.251 |
| DYNC2I1  | 0.044  | 0.297 | 0.15   | 0.881 | 1.045 | 0.31  | 0.146  | 0.884 | 0.584 | 1.87  |
| DYNC2H1  | -0.28  | 0.298 | -0.941 | 0.347 | 0.756 | 0.225 | -1.086 | 0.277 | 0.422 | 1.354 |
| DYNC1LI2 | 0.579  | 0.303 | 1.912  | 0.056 | 1.785 | 0.541 | 1.451  | 0.147 | 0.986 | 3.232 |
| DYNC1LI1 | -0.203 | 0.303 | -0.672 | 0.502 | 0.816 | 0.247 | -0.745 | 0.456 | 0.451 | 1.476 |
| DYNC1I2  | -0.287 | 0.298 | -0.965 | 0.335 | 0.75  | 0.224 | -1.117 | 0.264 | 0.418 | 1.345 |
| DYNC1I1  | 0.179  | 0.296 | 0.606  | 0.545 | 1.196 | 0.354 | 0.554  | 0.579 | 0.67  | 2.138 |
| DYNC1H1  | -0.175 | 0.296 | -0.591 | 0.554 | 0.839 | 0.249 | -0.646 | 0.518 | 0.47  | 1.5   |
| DYM      | 0.17   | 0.295 | 0.576  | 0.565 | 1.185 | 0.35  | 0.53   | 0.596 | 0.664 | 2.115 |
| DXO      | 0.176  | 0.296 | 0.595  | 0.552 | 1.193 | 0.353 | 0.545  | 0.585 | 0.667 | 2.131 |
| DVL3     | 0.134  | 0.296 | 0.452  | 0.651 | 1.143 | 0.339 | 0.423  | 0.672 | 0.64  | 2.044 |
| DVL2     | -0.113 | 0.296 | -0.383 | 0.702 | 0.893 | 0.264 | -0.406 | 0.685 | 0.5   | 1.595 |
| DVL1     | -0.026 | 0.295 | -0.088 | 0.93  | 0.974 | 0.288 | -0.09  | 0.929 | 0.546 | 1.739 |
| DUX1     | -0.028 | 0.295 | -0.095 | 0.924 | 0.972 | 0.287 | -0.096 | 0.923 | 0.545 | 1.735 |
| DUT      | 0.895  | 0.315 | 2.839  | 0.005 | 2.447 | 0.771 | 1.876  | 0.061 | 1.319 | 4.538 |
| DUSP9    | 0.064  | 0.295 | 0.216  | 0.829 | 1.066 | 0.315 | 0.209  | 0.835 | 0.597 | 1.901 |
| DUSP7    | 0.115  | 0.295 | 0.39   | 0.696 | 1.122 | 0.331 | 0.369  | 0.712 | 0.629 | 2.002 |
| DUSP6    | -0.078 | 0.295 | -0.264 | 0.791 | 0.925 | 0.273 | -0.275 | 0.783 | 0.519 | 1.65  |
| DUSP5    | -0.233 | 0.3   | -0.776 | 0.437 | 0.792 | 0.238 | -0.874 | 0.382 | 0.44  | 1.427 |
| DUSP4    | -0.295 | 0.3   | -0.983 | 0.326 | 0.745 | 0.223 | -1.143 | 0.253 | 0.414 | 1.341 |
| DUSP3    | -0.085 | 0.296 | -0.287 | 0.774 | 0.919 | 0.272 | -0.299 | 0.765 | 0.515 | 1.64  |
| DUSP26   | 0.241  | 0.297 | 0.81   | 0.418 | 1.272 | 0.378 | 0.72   | 0.471 | 0.711 | 2.277 |

|              |        |       |        |       |       |       |        |       |       |       |
|--------------|--------|-------|--------|-------|-------|-------|--------|-------|-------|-------|
| DUSP22       | 0.417  | 0.3   | 1.391  | 0.164 | 1.517 | 0.455 | 1.138  | 0.255 | 0.843 | 2.73  |
| DUSP21       | 0.502  | 0.302 | 1.661  | 0.097 | 1.652 | 0.499 | 1.306  | 0.192 | 0.913 | 2.987 |
| DUSP2        | 0.213  | 0.296 | 0.72   | 0.472 | 1.238 | 0.367 | 0.648  | 0.517 | 0.693 | 2.212 |
| DUSP14       | 0.762  | 0.31  | 2.456  | 0.014 | 2.143 | 0.665 | 1.719  | 0.086 | 1.166 | 3.936 |
| DUSP13       | -0.148 | 0.296 | -0.499 | 0.618 | 0.863 | 0.255 | -0.538 | 0.591 | 0.483 | 1.541 |
| DUSP12       | -0.053 | 0.295 | -0.178 | 0.858 | 0.949 | 0.28  | -0.183 | 0.855 | 0.532 | 1.692 |
| DUSP11       | -0.122 | 0.296 | -0.411 | 0.681 | 0.885 | 0.262 | -0.437 | 0.662 | 0.495 | 1.583 |
| DUSP10       | -0.684 | 0.31  | -2.206 | 0.027 | 0.504 | 0.156 | -3.167 | 0.002 | 0.275 | 0.927 |
| DUSP1        | 0.116  | 0.296 | 0.391  | 0.696 | 1.123 | 0.332 | 0.369  | 0.712 | 0.629 | 2.005 |
| DUS4L        | -0.065 | 0.295 | -0.219 | 0.827 | 0.937 | 0.277 | -0.226 | 0.821 | 0.526 | 1.671 |
| DUS2         | 0.619  | 0.306 | 2.026  | 0.043 | 1.857 | 0.568 | 1.51   | 0.131 | 1.02  | 3.382 |
| DUS1L        | 0.411  | 0.3   | 1.372  | 0.17  | 1.508 | 0.452 | 1.125  | 0.261 | 0.839 | 2.714 |
| DUOX2        | -0.309 | 0.298 | -1.038 | 0.299 | 0.734 | 0.219 | -1.216 | 0.224 | 0.41  | 1.316 |
| DUOX1        | -0.21  | 0.296 | -0.709 | 0.478 | 0.811 | 0.24  | -0.789 | 0.43  | 0.454 | 1.448 |
| DTYMK        | 0.276  | 0.297 | 0.932  | 0.351 | 1.318 | 0.391 | 0.814  | 0.415 | 0.737 | 2.358 |
| DTX4         | -0.468 | 0.3   | -1.561 | 0.119 | 0.626 | 0.188 | -1.991 | 0.047 | 0.348 | 1.127 |
| DTX3         | -0.59  | 0.306 | -1.931 | 0.053 | 0.554 | 0.169 | -2.632 | 0.008 | 0.304 | 1.009 |
| DTX2P1-UPK3B | 0.517  | 0.302 | 1.712  | 0.087 | 1.677 | 0.507 | 1.337  | 0.181 | 0.928 | 3.032 |
| DTX2         | 0.183  | 0.296 | 0.618  | 0.537 | 1.201 | 0.356 | 0.565  | 0.572 | 0.672 | 2.146 |
| DTWD1        | -0.108 | 0.296 | -0.364 | 0.716 | 0.898 | 0.265 | -0.385 | 0.701 | 0.503 | 1.603 |
| DTNB-AS1     | -0.324 | 0.298 | -1.089 | 0.276 | 0.723 | 0.215 | -1.286 | 0.198 | 0.403 | 1.296 |
| DTNB         | -0.12  | 0.296 | -0.406 | 0.685 | 0.887 | 0.263 | -0.431 | 0.666 | 0.496 | 1.585 |
| DTNA         | 0.279  | 0.298 | 0.939  | 0.348 | 1.322 | 0.394 | 0.819  | 0.413 | 0.738 | 2.37  |
| DTL          | 0.702  | 0.31  | 2.265  | 0.023 | 2.018 | 0.626 | 1.628  | 0.104 | 1.099 | 3.705 |
| DSTYK        | 0.24   | 0.298 | 0.805  | 0.421 | 1.271 | 0.378 | 0.716  | 0.474 | 0.709 | 2.277 |
| DSTNP2       | 0.093  | 0.297 | 0.313  | 0.754 | 1.097 | 0.325 | 0.299  | 0.765 | 0.614 | 1.962 |
| DSTN         | -0.327 | 0.298 | -1.099 | 0.272 | 0.721 | 0.215 | -1.3   | 0.193 | 0.402 | 1.292 |
| DST          | -0.583 | 0.301 | -1.937 | 0.053 | 0.558 | 0.168 | -2.63  | 0.009 | 0.309 | 1.007 |
| DSPP         | 0.496  | 0.3   | 1.654  | 0.098 | 1.643 | 0.493 | 1.304  | 0.192 | 0.912 | 2.959 |
| DSP          | 0.287  | 0.301 | 0.954  | 0.34  | 1.332 | 0.4   | 0.829  | 0.407 | 0.739 | 2.4   |
| DSN1         | 0.749  | 0.31  | 2.417  | 0.016 | 2.116 | 0.656 | 1.701  | 0.089 | 1.152 | 3.885 |
| DSG3         | -0.379 | 0.3   | -1.264 | 0.206 | 0.685 | 0.205 | -1.537 | 0.124 | 0.381 | 1.232 |
| DSG2         | -0.017 | 0.296 | -0.059 | 0.953 | 0.983 | 0.291 | -0.059 | 0.953 | 0.55  | 1.754 |
| DSG1         | 0.237  | 0.296 | 0.799  | 0.424 | 1.267 | 0.376 | 0.711  | 0.477 | 0.709 | 2.265 |
| DSE          | -0.622 | 0.303 | -2.053 | 0.04  | 0.537 | 0.163 | -2.848 | 0.004 | 0.296 | 0.972 |
| DSCR4        | 0.116  | 0.295 | 0.393  | 0.694 | 1.123 | 0.331 | 0.371  | 0.71  | 0.63  | 2.002 |
| DSCC1        | 0.507  | 0.3   | 1.691  | 0.091 | 1.66  | 0.497 | 1.327  | 0.185 | 0.923 | 2.987 |
| DSCAM        | 0.623  | 0.31  | 2.012  | 0.044 | 1.865 | 0.578 | 1.497  | 0.134 | 1.016 | 3.422 |

|           |        |       |        |       |       |       |        |       |       |       |
|-----------|--------|-------|--------|-------|-------|-------|--------|-------|-------|-------|
| DSC3      | -0.143 | 0.296 | -0.483 | 0.629 | 0.867 | 0.257 | -0.52  | 0.603 | 0.485 | 1.548 |
| DSC2      | 0.146  | 0.297 | 0.494  | 0.621 | 1.158 | 0.344 | 0.459  | 0.646 | 0.647 | 2.071 |
| DSC1      | -0.319 | 0.298 | -1.07  | 0.285 | 0.727 | 0.217 | -1.26  | 0.208 | 0.405 | 1.304 |
| DRP2      | 0.068  | 0.295 | 0.231  | 0.818 | 1.07  | 0.316 | 0.223  | 0.824 | 0.6   | 1.91  |
| DROSHA    | 0.765  | 0.315 | 2.426  | 0.015 | 2.149 | 0.678 | 1.696  | 0.09  | 1.158 | 3.987 |
| DRICH1    | 0.113  | 0.295 | 0.383  | 0.702 | 1.12  | 0.331 | 0.362  | 0.717 | 0.628 | 1.998 |
| DRG2      | -0.216 | 0.298 | -0.727 | 0.467 | 0.805 | 0.24  | -0.812 | 0.417 | 0.449 | 1.443 |
| DRG1      | 0.214  | 0.296 | 0.722  | 0.47  | 1.238 | 0.367 | 0.65   | 0.516 | 0.693 | 2.213 |
| DRD5      | 0.463  | 0.3   | 1.544  | 0.123 | 1.589 | 0.476 | 1.236  | 0.216 | 0.883 | 2.859 |
| DRD4      | -0.187 | 0.296 | -0.631 | 0.528 | 0.829 | 0.246 | -0.694 | 0.487 | 0.464 | 1.482 |
| DRD3      | -0.438 | 0.3   | -1.463 | 0.144 | 0.645 | 0.193 | -1.835 | 0.066 | 0.359 | 1.161 |
| DRD2      | 0.015  | 0.299 | 0.05   | 0.96  | 1.015 | 0.304 | 0.05   | 0.96  | 0.565 | 1.825 |
| DRD1      | 0.338  | 0.298 | 1.135  | 0.256 | 1.402 | 0.417 | 0.963  | 0.335 | 0.782 | 2.512 |
| DRC3      | -0.233 | 0.298 | -0.784 | 0.433 | 0.792 | 0.236 | -0.883 | 0.378 | 0.442 | 1.419 |
| DRAP1     | 0.371  | 0.298 | 1.245  | 0.213 | 1.449 | 0.432 | 1.04   | 0.298 | 0.808 | 2.598 |
| DRAM1     | -0.388 | 0.299 | -1.298 | 0.194 | 0.679 | 0.203 | -1.585 | 0.113 | 0.378 | 1.219 |
| DR1       | -0.086 | 0.295 | -0.29  | 0.772 | 0.918 | 0.271 | -0.303 | 0.762 | 0.514 | 1.638 |
| DPYSL4    | -0.043 | 0.297 | -0.145 | 0.885 | 0.958 | 0.284 | -0.148 | 0.882 | 0.536 | 1.713 |
| DPYSL3    | -0.608 | 0.303 | -2.01  | 0.044 | 0.544 | 0.165 | -2.766 | 0.006 | 0.301 | 0.985 |
| DPYSL2    | -0.326 | 0.298 | -1.097 | 0.273 | 0.721 | 0.215 | -1.298 | 0.194 | 0.403 | 1.293 |
| DPYS      | 0.263  | 0.298 | 0.884  | 0.377 | 1.301 | 0.387 | 0.777  | 0.437 | 0.726 | 2.332 |
| DPYD      | -0.566 | 0.303 | -1.869 | 0.062 | 0.568 | 0.172 | -2.513 | 0.012 | 0.314 | 1.028 |
| DPY19L4   | 0.09   | 0.295 | 0.305  | 0.761 | 1.094 | 0.323 | 0.291  | 0.771 | 0.614 | 1.95  |
| DPY19L2P2 | -0.258 | 0.297 | -0.869 | 0.385 | 0.773 | 0.229 | -0.991 | 0.322 | 0.432 | 1.382 |
| DPY19L1P1 | -0.332 | 0.298 | -1.116 | 0.265 | 0.717 | 0.214 | -1.323 | 0.186 | 0.4   | 1.286 |
| DPY19L1   | -0.213 | 0.297 | -0.717 | 0.473 | 0.809 | 0.24  | -0.799 | 0.424 | 0.452 | 1.446 |
| DPT       | -1.026 | 0.321 | -3.197 | 0.001 | 0.358 | 0.115 | -5.579 | 0     | 0.191 | 0.672 |
| DPPA4     | 0.028  | 0.296 | 0.094  | 0.925 | 1.028 | 0.304 | 0.092  | 0.926 | 0.576 | 1.836 |
| DPP8      | -0.471 | 0.302 | -1.557 | 0.119 | 0.625 | 0.189 | -1.989 | 0.047 | 0.345 | 1.13  |
| DPP6      | -0.017 | 0.295 | -0.058 | 0.954 | 0.983 | 0.29  | -0.059 | 0.953 | 0.551 | 1.753 |
| DPP4      | -0.311 | 0.297 | -1.047 | 0.295 | 0.732 | 0.218 | -1.229 | 0.219 | 0.409 | 1.312 |
| DPP3      | 0.376  | 0.298 | 1.264  | 0.206 | 1.457 | 0.434 | 1.054  | 0.292 | 0.813 | 2.611 |
| DPM3      | -0.009 | 0.297 | -0.03  | 0.976 | 0.991 | 0.294 | -0.03  | 0.976 | 0.554 | 1.773 |
| DPM2      | 0.287  | 0.296 | 0.968  | 0.333 | 1.332 | 0.395 | 0.841  | 0.4   | 0.745 | 2.381 |
| DPM1      | 0.722  | 0.31  | 2.331  | 0.02  | 2.059 | 0.638 | 1.66   | 0.097 | 1.122 | 3.778 |
| DPH5      | -0.392 | 0.3   | -1.307 | 0.191 | 0.676 | 0.203 | -1.6   | 0.11  | 0.376 | 1.216 |
| DPH2      | 0.265  | 0.296 | 0.896  | 0.37  | 1.304 | 0.386 | 0.787  | 0.431 | 0.73  | 2.331 |
| DPF3      | -0.362 | 0.299 | -1.21  | 0.226 | 0.697 | 0.208 | -1.458 | 0.145 | 0.388 | 1.251 |



|         |        |       |        |       |       |       |        |       |       |       |
|---------|--------|-------|--------|-------|-------|-------|--------|-------|-------|-------|
| DPF2    | 0.31   | 0.298 | 1.043  | 0.297 | 1.364 | 0.406 | 0.897  | 0.37  | 0.761 | 2.444 |
| DPF1    | -0.285 | 0.3   | -0.952 | 0.341 | 0.752 | 0.225 | -1.102 | 0.271 | 0.418 | 1.353 |
| DPEP3   | -0.157 | 0.296 | -0.53  | 0.596 | 0.855 | 0.253 | -0.573 | 0.566 | 0.478 | 1.527 |
| DPEP2   | -0.467 | 0.3   | -1.558 | 0.119 | 0.627 | 0.188 | -1.985 | 0.047 | 0.348 | 1.128 |
| DPEP1   | -0.252 | 0.297 | -0.849 | 0.396 | 0.777 | 0.231 | -0.965 | 0.334 | 0.434 | 1.391 |
| DPAGT1  | -0.426 | 0.3   | -1.421 | 0.155 | 0.653 | 0.196 | -1.772 | 0.076 | 0.363 | 1.175 |
| DOT1L   | -0.419 | 0.3   | -1.399 | 0.162 | 0.657 | 0.197 | -1.738 | 0.082 | 0.365 | 1.183 |
| DOP1B   | -0.266 | 0.296 | -0.899 | 0.369 | 0.766 | 0.227 | -1.03  | 0.303 | 0.429 | 1.369 |
| DOP1A   | 0.584  | 0.306 | 1.91   | 0.056 | 1.793 | 0.548 | 1.447  | 0.148 | 0.985 | 3.262 |
| DONSON  | 0.402  | 0.298 | 1.349  | 0.177 | 1.494 | 0.445 | 1.111  | 0.267 | 0.834 | 2.678 |
| DOLPP1  | -0.106 | 0.296 | -0.358 | 0.72  | 0.899 | 0.266 | -0.378 | 0.705 | 0.504 | 1.606 |
| DOLK    | 0.042  | 0.297 | 0.14   | 0.888 | 1.043 | 0.31  | 0.138  | 0.891 | 0.582 | 1.866 |
| DOK5    | -0.442 | 0.3   | -1.475 | 0.14  | 0.642 | 0.193 | -1.855 | 0.064 | 0.357 | 1.157 |
| DOK4    | -0.374 | 0.303 | -1.234 | 0.217 | 0.688 | 0.208 | -1.497 | 0.134 | 0.38  | 1.246 |
| DOK3    | 0.055  | 0.296 | 0.186  | 0.852 | 1.057 | 0.313 | 0.181  | 0.856 | 0.592 | 1.887 |
| DOK2    | 0.341  | 0.3   | 1.135  | 0.256 | 1.406 | 0.422 | 0.962  | 0.336 | 0.781 | 2.531 |
| DOK1    | -0.401 | 0.304 | -1.32  | 0.187 | 0.67  | 0.203 | -1.624 | 0.104 | 0.369 | 1.215 |
| DOHH    | 0.99   | 0.319 | 3.106  | 0.002 | 2.691 | 0.858 | 1.972  | 0.049 | 1.441 | 5.027 |
| DOCK9   | 0.007  | 0.295 | 0.025  | 0.98  | 1.007 | 0.298 | 0.025  | 0.98  | 0.565 | 1.797 |
| DOCK6   | -0.489 | 0.3   | -1.627 | 0.104 | 0.614 | 0.184 | -2.098 | 0.036 | 0.341 | 1.105 |
| DOCK5   | 0.118  | 0.297 | 0.396  | 0.692 | 1.125 | 0.334 | 0.374  | 0.709 | 0.629 | 2.013 |
| DOCK4   | -0.006 | 0.298 | -0.02  | 0.984 | 0.994 | 0.296 | -0.02  | 0.984 | 0.555 | 1.781 |
| DOCK3   | 0.401  | 0.303 | 1.325  | 0.185 | 1.494 | 0.452 | 1.091  | 0.275 | 0.825 | 2.704 |
| DOCK2   | -0.021 | 0.295 | -0.07  | 0.944 | 0.98  | 0.289 | -0.07  | 0.944 | 0.549 | 1.748 |
| DOCK10  | -0.996 | 0.328 | -3.039 | 0.002 | 0.369 | 0.121 | -5.21  | 0     | 0.194 | 0.702 |
| DOCK1   | -0.494 | 0.306 | -1.614 | 0.107 | 0.61  | 0.187 | -2.088 | 0.037 | 0.335 | 1.112 |
| DOC2B   | 0.461  | 0.302 | 1.527  | 0.127 | 1.586 | 0.479 | 1.223  | 0.221 | 0.877 | 2.868 |
| DOC2A   | -0.436 | 0.3   | -1.456 | 0.145 | 0.647 | 0.194 | -1.825 | 0.068 | 0.359 | 1.163 |
| DNNTIP2 | 0.017  | 0.295 | 0.059  | 0.953 | 1.018 | 0.301 | 0.059  | 0.953 | 0.57  | 1.816 |
| DNNT    | 0.359  | 0.3   | 1.196  | 0.232 | 1.432 | 0.429 | 1.005  | 0.315 | 0.795 | 2.577 |
| DNPH1   | 0.559  | 0.306 | 1.829  | 0.067 | 1.749 | 0.535 | 1.401  | 0.161 | 0.961 | 3.185 |
| DNPEP   | 0.285  | 0.296 | 0.961  | 0.337 | 1.329 | 0.394 | 0.836  | 0.403 | 0.744 | 2.376 |
| DNMT3L  | 0.087  | 0.295 | 0.295  | 0.768 | 1.091 | 0.322 | 0.283  | 0.777 | 0.612 | 1.946 |
| DNMT3B  | 0.747  | 0.315 | 2.369  | 0.018 | 2.11  | 0.665 | 1.669  | 0.095 | 1.137 | 3.914 |
| DNMT3A  | 0.542  | 0.306 | 1.771  | 0.077 | 1.72  | 0.526 | 1.367  | 0.172 | 0.944 | 3.134 |
| DNMT1   | -0.005 | 0.296 | -0.018 | 0.986 | 0.995 | 0.295 | -0.018 | 0.986 | 0.557 | 1.778 |
| DNMBP   | -0.653 | 0.31  | -2.109 | 0.035 | 0.52  | 0.161 | -2.976 | 0.003 | 0.284 | 0.955 |
| DNM3    | -0.211 | 0.296 | -0.715 | 0.474 | 0.809 | 0.239 | -0.797 | 0.426 | 0.453 | 1.445 |

|          |        |       |        |       |       |       |        |       |       |       |
|----------|--------|-------|--------|-------|-------|-------|--------|-------|-------|-------|
| DNM2     | -0.073 | 0.295 | -0.249 | 0.804 | 0.929 | 0.274 | -0.258 | 0.796 | 0.521 | 1.658 |
| DNM1L    | 0.346  | 0.298 | 1.163  | 0.245 | 1.414 | 0.421 | 0.983  | 0.325 | 0.789 | 2.534 |
| DNM1     | -0.348 | 0.3   | -1.162 | 0.245 | 0.706 | 0.212 | -1.39  | 0.165 | 0.392 | 1.27  |
| DND1     | 0.227  | 0.299 | 0.757  | 0.449 | 1.254 | 0.375 | 0.677  | 0.498 | 0.698 | 2.255 |
| DNASE2B  | 0.224  | 0.298 | 0.753  | 0.452 | 1.251 | 0.373 | 0.674  | 0.5   | 0.698 | 2.243 |
| DNASE2   | -0.472 | 0.301 | -1.571 | 0.116 | 0.624 | 0.187 | -2.009 | 0.045 | 0.346 | 1.124 |
| DNASE1L3 | -0.591 | 0.303 | -1.952 | 0.051 | 0.554 | 0.168 | -2.661 | 0.008 | 0.306 | 1.003 |
| DNASE1L2 | -0.224 | 0.296 | -0.755 | 0.45  | 0.8   | 0.237 | -0.846 | 0.398 | 0.447 | 1.43  |
| DNASE1L1 | -0.26  | 0.298 | -0.872 | 0.383 | 0.771 | 0.23  | -0.996 | 0.319 | 0.43  | 1.382 |
| DNASE1   | 0.472  | 0.3   | 1.575  | 0.115 | 1.604 | 0.481 | 1.255  | 0.209 | 0.891 | 2.887 |
| DNALI1   | -0.091 | 0.296 | -0.306 | 0.759 | 0.913 | 0.27  | -0.321 | 0.749 | 0.512 | 1.631 |
| DNAL4    | 0.155  | 0.296 | 0.526  | 0.599 | 1.168 | 0.346 | 0.487  | 0.626 | 0.654 | 2.086 |
| DNAJC9   | 0.899  | 0.315 | 2.856  | 0.004 | 2.456 | 0.773 | 1.884  | 0.06  | 1.326 | 4.551 |
| DNAJC8   | 0.269  | 0.298 | 0.905  | 0.365 | 1.309 | 0.39  | 0.794  | 0.427 | 0.731 | 2.346 |
| DNAJC7   | 0.229  | 0.296 | 0.774  | 0.439 | 1.258 | 0.372 | 0.692  | 0.489 | 0.704 | 2.247 |
| DNAJC6   | 0.368  | 0.298 | 1.234  | 0.217 | 1.444 | 0.43  | 1.032  | 0.302 | 0.805 | 2.59  |
| DNAJC4   | -0.847 | 0.315 | -2.69  | 0.007 | 0.429 | 0.135 | -4.233 | 0     | 0.231 | 0.795 |
| DNAJC3   | 0.786  | 0.31  | 2.532  | 0.011 | 2.194 | 0.681 | 1.754  | 0.079 | 1.194 | 4.03  |
| DNAJC28  | 0.055  | 0.297 | 0.185  | 0.854 | 1.056 | 0.313 | 0.18   | 0.857 | 0.591 | 1.889 |
| DNAJC24  | -0.025 | 0.295 | -0.084 | 0.933 | 0.975 | 0.288 | -0.085 | 0.932 | 0.547 | 1.74  |
| DNAJC22  | 0.19   | 0.296 | 0.642  | 0.521 | 1.209 | 0.358 | 0.584  | 0.559 | 0.677 | 2.161 |
| DNAJC2   | 0.238  | 0.296 | 0.803  | 0.422 | 1.269 | 0.376 | 0.715  | 0.475 | 0.71  | 2.267 |
| DNAJC17  | 0.6    | 0.306 | 1.964  | 0.05  | 1.823 | 0.557 | 1.477  | 0.14  | 1.001 | 3.319 |
| DNAJC16  | -0.41  | 0.3   | -1.368 | 0.171 | 0.664 | 0.199 | -1.691 | 0.091 | 0.369 | 1.194 |
| DNAJC15  | 0.428  | 0.3   | 1.425  | 0.154 | 1.534 | 0.46  | 1.16   | 0.246 | 0.852 | 2.761 |
| DNAJC13  | 0.264  | 0.298 | 0.889  | 0.374 | 1.303 | 0.388 | 0.781  | 0.435 | 0.727 | 2.334 |
| DNAJC12  | -0.752 | 0.315 | -2.389 | 0.017 | 0.471 | 0.148 | -3.562 | 0     | 0.254 | 0.874 |
| DNAJC11  | -0.441 | 0.301 | -1.467 | 0.142 | 0.643 | 0.193 | -1.844 | 0.065 | 0.357 | 1.16  |
| DNAJC10  | -0.212 | 0.296 | -0.714 | 0.475 | 0.809 | 0.24  | -0.796 | 0.426 | 0.453 | 1.446 |
| DNAJC1   | -0.059 | 0.297 | -0.199 | 0.843 | 0.943 | 0.28  | -0.205 | 0.838 | 0.527 | 1.687 |
| DNAJB9   | -0.5   | 0.302 | -1.653 | 0.098 | 0.607 | 0.183 | -2.144 | 0.032 | 0.335 | 1.097 |
| DNAJB6   | -0.759 | 0.315 | -2.412 | 0.016 | 0.468 | 0.147 | -3.611 | 0     | 0.253 | 0.867 |
| DNAJB5   | 0.276  | 0.296 | 0.93   | 0.353 | 1.317 | 0.39  | 0.813  | 0.416 | 0.737 | 2.355 |
| DNAJB4   | -0.528 | 0.303 | -1.747 | 0.081 | 0.59  | 0.178 | -2.302 | 0.021 | 0.326 | 1.067 |
| DNAJB2   | 0.138  | 0.295 | 0.467  | 0.64  | 1.148 | 0.339 | 0.436  | 0.663 | 0.644 | 2.048 |
| DNAJB14  | 0.133  | 0.295 | 0.45   | 0.653 | 1.142 | 0.337 | 0.421  | 0.674 | 0.64  | 2.037 |
| DNAJB12  | -0.213 | 0.297 | -0.717 | 0.473 | 0.808 | 0.24  | -0.799 | 0.424 | 0.451 | 1.447 |
| DNAJB1   | 0.052  | 0.295 | 0.175  | 0.861 | 1.053 | 0.311 | 0.171  | 0.864 | 0.591 | 1.878 |

|        |        |       |        |       |       |       |        |       |       |       |
|--------|--------|-------|--------|-------|-------|-------|--------|-------|-------|-------|
| DNAJA4 | -0.194 | 0.297 | -0.653 | 0.514 | 0.824 | 0.245 | -0.72  | 0.471 | 0.46  | 1.475 |
| DNAJA3 | 0.222  | 0.296 | 0.751  | 0.453 | 1.249 | 0.37  | 0.673  | 0.501 | 0.699 | 2.232 |
| DNAJA2 | 0.333  | 0.3   | 1.108  | 0.268 | 1.394 | 0.419 | 0.942  | 0.346 | 0.774 | 2.511 |
| DNAJA1 | 0.2    | 0.296 | 0.677  | 0.499 | 1.222 | 0.362 | 0.613  | 0.54  | 0.684 | 2.184 |
| DNAI4  | -0.454 | 0.302 | -1.503 | 0.133 | 0.635 | 0.192 | -1.903 | 0.057 | 0.351 | 1.148 |
| DNAI2  | -0.245 | 0.298 | -0.823 | 0.411 | 0.782 | 0.233 | -0.932 | 0.351 | 0.436 | 1.404 |
| DNAI1  | -0.048 | 0.296 | -0.163 | 0.871 | 0.953 | 0.282 | -0.167 | 0.867 | 0.534 | 1.701 |
| DNAH9  | 0.007  | 0.295 | 0.025  | 0.98  | 1.007 | 0.297 | 0.025  | 0.98  | 0.565 | 1.796 |
| DNAH7  | 0.052  | 0.295 | 0.177  | 0.859 | 1.054 | 0.311 | 0.173  | 0.863 | 0.591 | 1.88  |
| DNAH6  | 0.282  | 0.297 | 0.949  | 0.342 | 1.325 | 0.393 | 0.828  | 0.408 | 0.741 | 2.37  |
| DNAH3  | -0.218 | 0.296 | -0.737 | 0.461 | 0.804 | 0.238 | -0.824 | 0.41  | 0.45  | 1.437 |
| DNAH2  | -0.332 | 0.298 | -1.114 | 0.265 | 0.717 | 0.214 | -1.321 | 0.186 | 0.4   | 1.287 |
| DNAH17 | 0.422  | 0.302 | 1.394  | 0.163 | 1.524 | 0.461 | 1.138  | 0.255 | 0.843 | 2.757 |
| DNAAF5 | 0.365  | 0.3   | 1.217  | 0.224 | 1.44  | 0.432 | 1.02   | 0.308 | 0.8   | 2.592 |
| DNAAF2 | -0.05  | 0.295 | -0.168 | 0.866 | 0.952 | 0.281 | -0.173 | 0.863 | 0.533 | 1.697 |
| DNAAF1 | -0.002 | 0.296 | -0.005 | 0.996 | 0.998 | 0.295 | -0.005 | 0.996 | 0.559 | 1.783 |
| DNA2   | 0.348  | 0.3   | 1.161  | 0.246 | 1.417 | 0.425 | 0.981  | 0.327 | 0.787 | 2.55  |
| DMXL2  | -0.512 | 0.302 | -1.693 | 0.09  | 0.599 | 0.181 | -2.211 | 0.027 | 0.331 | 1.084 |
| DMXL1  | -0.377 | 0.302 | -1.247 | 0.212 | 0.686 | 0.207 | -1.514 | 0.13  | 0.379 | 1.241 |
| DMWD   | 0.123  | 0.3   | 0.409  | 0.682 | 1.131 | 0.339 | 0.385  | 0.7   | 0.628 | 2.034 |
| DMTN   | 0.134  | 0.296 | 0.452  | 0.651 | 1.143 | 0.339 | 0.423  | 0.672 | 0.64  | 2.044 |
| DMTF1  | -0.105 | 0.297 | -0.354 | 0.723 | 0.9   | 0.267 | -0.373 | 0.709 | 0.504 | 1.61  |
| DMRT1  | 0.135  | 0.295 | 0.456  | 0.648 | 1.144 | 0.338 | 0.427  | 0.67  | 0.641 | 2.042 |
| DMPK   | -0.354 | 0.298 | -1.186 | 0.236 | 0.702 | 0.209 | -1.423 | 0.155 | 0.392 | 1.259 |
| DMP1   | -0.384 | 0.3   | -1.28  | 0.201 | 0.681 | 0.204 | -1.56  | 0.119 | 0.379 | 1.226 |
| DMD    | -0.188 | 0.296 | -0.637 | 0.524 | 0.828 | 0.245 | -0.701 | 0.483 | 0.464 | 1.479 |
| DMC1   | -0.423 | 0.3   | -1.411 | 0.158 | 0.655 | 0.196 | -1.756 | 0.079 | 0.364 | 1.179 |
| DMBT1  | 0.492  | 0.302 | 1.629  | 0.103 | 1.636 | 0.495 | 1.286  | 0.198 | 0.905 | 2.959 |
| DMAC2L | -0.241 | 0.297 | -0.813 | 0.416 | 0.786 | 0.233 | -0.919 | 0.358 | 0.439 | 1.406 |
| DMAC2  | -0.414 | 0.3   | -1.38  | 0.168 | 0.661 | 0.198 | -1.71  | 0.087 | 0.367 | 1.19  |
| DLX6   | 0.083  | 0.296 | 0.282  | 0.778 | 1.087 | 0.321 | 0.271  | 0.787 | 0.609 | 1.94  |
| DLX5   | 0.01   | 0.295 | 0.033  | 0.973 | 1.01  | 0.298 | 0.033  | 0.974 | 0.566 | 1.801 |
| DLX4   | 0.327  | 0.298 | 1.1    | 0.271 | 1.387 | 0.413 | 0.938  | 0.348 | 0.774 | 2.487 |
| DLX2   | -0.384 | 0.298 | -1.289 | 0.198 | 0.681 | 0.203 | -1.571 | 0.116 | 0.38  | 1.221 |
| DLL3   | -0.003 | 0.295 | -0.011 | 0.991 | 0.997 | 0.294 | -0.011 | 0.991 | 0.559 | 1.778 |
| DLK2   | 0.571  | 0.306 | 1.863  | 0.062 | 1.769 | 0.542 | 1.42   | 0.156 | 0.971 | 3.224 |
| DLK1   | 0.234  | 0.298 | 0.786  | 0.432 | 1.264 | 0.376 | 0.701  | 0.483 | 0.705 | 2.264 |
| DLGAP5 | 0.86   | 0.315 | 2.733  | 0.006 | 2.364 | 0.744 | 1.833  | 0.067 | 1.275 | 4.381 |

|               |        |       |        |       |       |       |        |       |       |       |
|---------------|--------|-------|--------|-------|-------|-------|--------|-------|-------|-------|
| DLGAP4        | -0.105 | 0.295 | -0.357 | 0.721 | 0.9   | 0.266 | -0.376 | 0.707 | 0.505 | 1.605 |
| DLGAP2        | -0.618 | 0.304 | -2.03  | 0.042 | 0.539 | 0.164 | -2.809 | 0.005 | 0.297 | 0.979 |
| DLGAP1        | 0.537  | 0.302 | 1.775  | 0.076 | 1.71  | 0.517 | 1.374  | 0.17  | 0.946 | 3.094 |
| DLG5          | -0.105 | 0.296 | -0.356 | 0.722 | 0.9   | 0.267 | -0.375 | 0.708 | 0.503 | 1.609 |
| DLG4          | -0.027 | 0.295 | -0.09  | 0.928 | 0.974 | 0.288 | -0.091 | 0.927 | 0.546 | 1.737 |
| DLG3          | -0.226 | 0.298 | -0.759 | 0.448 | 0.798 | 0.237 | -0.851 | 0.395 | 0.445 | 1.43  |
| DLG2          | 0.139  | 0.295 | 0.471  | 0.638 | 1.149 | 0.339 | 0.44   | 0.66  | 0.644 | 2.05  |
| DLG1          | 0.178  | 0.295 | 0.604  | 0.546 | 1.195 | 0.353 | 0.553  | 0.58  | 0.67  | 2.133 |
| DLEU2         | 0.164  | 0.295 | 0.554  | 0.58  | 1.178 | 0.348 | 0.511  | 0.609 | 0.66  | 2.101 |
| DLEU1         | 0.499  | 0.302 | 1.652  | 0.098 | 1.648 | 0.498 | 1.301  | 0.193 | 0.911 | 2.979 |
| DLEC1         | -0.41  | 0.298 | -1.374 | 0.169 | 0.664 | 0.198 | -1.699 | 0.089 | 0.37  | 1.191 |
| DLD           | -0.188 | 0.298 | -0.631 | 0.528 | 0.829 | 0.247 | -0.694 | 0.488 | 0.462 | 1.486 |
| DLC1          | -0.567 | 0.302 | -1.876 | 0.061 | 0.567 | 0.172 | -2.524 | 0.012 | 0.313 | 1.026 |
| DLAT          | -0.617 | 0.304 | -2.034 | 0.042 | 0.539 | 0.164 | -2.813 | 0.005 | 0.297 | 0.978 |
| DKKL1         | 0.144  | 0.296 | 0.487  | 0.626 | 1.155 | 0.342 | 0.454  | 0.65  | 0.646 | 2.065 |
| DKK4          | -0.522 | 0.303 | -1.726 | 0.084 | 0.593 | 0.18  | -2.266 | 0.023 | 0.328 | 1.073 |
| DKK3          | -0.918 | 0.316 | -2.909 | 0.004 | 0.399 | 0.126 | -4.768 | 0     | 0.215 | 0.741 |
| DKK2          | -0.946 | 0.321 | -2.948 | 0.003 | 0.388 | 0.125 | -4.909 | 0     | 0.207 | 0.728 |
| DKK1          | -0.296 | 0.298 | -0.994 | 0.32  | 0.743 | 0.222 | -1.157 | 0.247 | 0.414 | 1.334 |
| DKFZP58611420 | -0.397 | 0.299 | -1.325 | 0.185 | 0.673 | 0.201 | -1.626 | 0.104 | 0.374 | 1.21  |
| DKFZP434A062  | 0.102  | 0.295 | 0.346  | 0.729 | 1.108 | 0.327 | 0.329  | 0.742 | 0.621 | 1.977 |
| DIXDC1        | -0.519 | 0.302 | -1.718 | 0.086 | 0.595 | 0.18  | -2.253 | 0.024 | 0.329 | 1.076 |
| DISC1         | 0.198  | 0.296 | 0.668  | 0.504 | 1.219 | 0.361 | 0.606  | 0.545 | 0.682 | 2.177 |
| DIS3          | -0.399 | 0.3   | -1.332 | 0.183 | 0.671 | 0.201 | -1.636 | 0.102 | 0.373 | 1.207 |
| DIRAS3        | -0.492 | 0.306 | -1.607 | 0.108 | 0.611 | 0.187 | -2.076 | 0.038 | 0.335 | 1.114 |
| DIRAS2        | 0.388  | 0.303 | 1.28   | 0.201 | 1.474 | 0.447 | 1.061  | 0.289 | 0.814 | 2.669 |
| DIPK2B        | 0.094  | 0.295 | 0.317  | 0.752 | 1.098 | 0.324 | 0.302  | 0.762 | 0.615 | 1.959 |
| DIPK1A        | -0.357 | 0.3   | -1.191 | 0.234 | 0.7   | 0.21  | -1.431 | 0.152 | 0.389 | 1.259 |
| DIP2C         | 0.12   | 0.295 | 0.407  | 0.684 | 1.128 | 0.333 | 0.383  | 0.702 | 0.632 | 2.012 |
| DIP2A         | 0.139  | 0.297 | 0.47   | 0.638 | 1.15  | 0.341 | 0.439  | 0.661 | 0.643 | 2.056 |
| DIO3          | -0.547 | 0.303 | -1.807 | 0.071 | 0.579 | 0.175 | -2.404 | 0.016 | 0.32  | 1.048 |
| DIO2          | -0.523 | 0.3   | -1.74  | 0.082 | 0.593 | 0.178 | -2.286 | 0.022 | 0.329 | 1.068 |
| DIO1          | -0.192 | 0.298 | -0.643 | 0.52  | 0.825 | 0.246 | -0.709 | 0.478 | 0.46  | 1.481 |
| DIMT1         | -0.175 | 0.299 | -0.587 | 0.557 | 0.839 | 0.251 | -0.642 | 0.521 | 0.467 | 1.507 |
| DIDO1         | 0.539  | 0.306 | 1.762  | 0.078 | 1.714 | 0.525 | 1.362  | 0.173 | 0.941 | 3.123 |
| DICER1        | -0.125 | 0.296 | -0.423 | 0.672 | 0.882 | 0.261 | -0.451 | 0.652 | 0.494 | 1.576 |
| DIAPH3        | 0.142  | 0.296 | 0.481  | 0.631 | 1.153 | 0.341 | 0.448  | 0.654 | 0.646 | 2.058 |
| DIAPH2-AS1    | -0.051 | 0.295 | -0.173 | 0.863 | 0.95  | 0.281 | -0.177 | 0.859 | 0.533 | 1.696 |

|        |        |       |        |       |       |       |        |       |       |       |
|--------|--------|-------|--------|-------|-------|-------|--------|-------|-------|-------|
| DIAPH2 | -0.135 | 0.295 | -0.456 | 0.649 | 0.874 | 0.258 | -0.488 | 0.626 | 0.49  | 1.56  |
| DIAPH1 | 0.279  | 0.3   | 0.931  | 0.352 | 1.322 | 0.397 | 0.812  | 0.417 | 0.734 | 2.38  |
| DIABLO | 0.243  | 0.296 | 0.821  | 0.411 | 1.276 | 0.378 | 0.729  | 0.466 | 0.714 | 2.281 |
| DHX9   | 0.446  | 0.3   | 1.489  | 0.136 | 1.562 | 0.468 | 1.201  | 0.23  | 0.868 | 2.811 |
| DHX8   | -0.014 | 0.298 | -0.048 | 0.962 | 0.986 | 0.294 | -0.048 | 0.962 | 0.55  | 1.768 |
| DHX58  | 0.016  | 0.297 | 0.055  | 0.956 | 1.017 | 0.302 | 0.055  | 0.956 | 0.568 | 1.819 |
| DHX57  | -0.049 | 0.296 | -0.167 | 0.868 | 0.952 | 0.282 | -0.171 | 0.864 | 0.533 | 1.7   |
| DHX40  | -0.435 | 0.302 | -1.439 | 0.15  | 0.647 | 0.196 | -1.802 | 0.072 | 0.358 | 1.171 |
| DHX38  | -0.278 | 0.298 | -0.934 | 0.35  | 0.757 | 0.226 | -1.077 | 0.281 | 0.422 | 1.357 |
| DHX35  | -0.201 | 0.298 | -0.676 | 0.499 | 0.818 | 0.243 | -0.749 | 0.454 | 0.456 | 1.465 |
| DHX34  | 0.444  | 0.3   | 1.481  | 0.139 | 1.558 | 0.467 | 1.196  | 0.232 | 0.866 | 2.804 |
| DHX32  | -0.264 | 0.298 | -0.887 | 0.375 | 0.768 | 0.229 | -1.015 | 0.31  | 0.428 | 1.376 |
| DHX30  | 0.333  | 0.297 | 1.12   | 0.263 | 1.395 | 0.415 | 0.952  | 0.341 | 0.779 | 2.5   |
| DHX29  | -0.551 | 0.306 | -1.802 | 0.072 | 0.577 | 0.176 | -2.403 | 0.016 | 0.317 | 1.05  |
| DHX16  | 0.179  | 0.296 | 0.606  | 0.545 | 1.196 | 0.354 | 0.555  | 0.579 | 0.67  | 2.135 |
| DHX15  | 0.72   | 0.307 | 2.349  | 0.019 | 2.054 | 0.63  | 1.674  | 0.094 | 1.127 | 3.747 |
| DHTKD1 | 1.212  | 0.336 | 3.606  | 0     | 3.362 | 1.131 | 2.089  | 0.037 | 1.739 | 6.499 |
| DHRS9  | 0.129  | 0.295 | 0.438  | 0.662 | 1.138 | 0.336 | 0.41   | 0.681 | 0.638 | 2.03  |
| DHRS7B | -0.144 | 0.296 | -0.485 | 0.627 | 0.866 | 0.257 | -0.522 | 0.602 | 0.485 | 1.548 |
| DHRS7  | -0.141 | 0.297 | -0.475 | 0.635 | 0.868 | 0.258 | -0.51  | 0.61  | 0.485 | 1.555 |
| DHRS3  | 0.228  | 0.296 | 0.768  | 0.442 | 1.256 | 0.372 | 0.687  | 0.492 | 0.702 | 2.245 |
| DHRS2  | -0.174 | 0.296 | -0.588 | 0.556 | 0.84  | 0.249 | -0.643 | 0.52  | 0.47  | 1.501 |
| DHRS12 | -0.417 | 0.303 | -1.379 | 0.168 | 0.659 | 0.199 | -1.711 | 0.087 | 0.364 | 1.192 |
| DHRS11 | 0.312  | 0.297 | 1.052  | 0.293 | 1.366 | 0.405 | 0.904  | 0.366 | 0.764 | 2.443 |
| DHRS1  | 0.264  | 0.297 | 0.89   | 0.373 | 1.302 | 0.386 | 0.782  | 0.434 | 0.728 | 2.33  |
| DHPS   | -0.437 | 0.306 | -1.426 | 0.154 | 0.646 | 0.198 | -1.788 | 0.074 | 0.354 | 1.178 |
| DHODH  | 0.354  | 0.3   | 1.181  | 0.237 | 1.425 | 0.427 | 0.995  | 0.32  | 0.792 | 2.564 |
| DHFRP3 | 0.098  | 0.295 | 0.332  | 0.74  | 1.103 | 0.326 | 0.316  | 0.752 | 0.618 | 1.967 |
| DHFR   | 0.932  | 0.315 | 2.959  | 0.003 | 2.54  | 0.8   | 1.925  | 0.054 | 1.37  | 4.709 |
| DHDDS  | 0.302  | 0.297 | 1.017  | 0.309 | 1.352 | 0.402 | 0.878  | 0.38  | 0.756 | 2.42  |
| DHCR7  | 0.213  | 0.296 | 0.718  | 0.473 | 1.237 | 0.367 | 0.647  | 0.518 | 0.692 | 2.212 |
| DHCR24 | 0.094  | 0.295 | 0.317  | 0.751 | 1.098 | 0.324 | 0.303  | 0.762 | 0.616 | 1.959 |
| DGUOK  | 0.719  | 0.31  | 2.321  | 0.02  | 2.053 | 0.636 | 1.655  | 0.098 | 1.118 | 3.768 |
| DGLUCY | -0.241 | 0.298 | -0.808 | 0.419 | 0.786 | 0.234 | -0.914 | 0.361 | 0.438 | 1.409 |
| DGKZ   | -0.292 | 0.297 | -0.981 | 0.327 | 0.747 | 0.222 | -1.139 | 0.255 | 0.417 | 1.338 |
| DGKQ   | -0.117 | 0.295 | -0.394 | 0.693 | 0.89  | 0.263 | -0.418 | 0.676 | 0.499 | 1.588 |
| DGKI   | -0.555 | 0.303 | -1.828 | 0.067 | 0.574 | 0.174 | -2.444 | 0.015 | 0.317 | 1.041 |
| DGKH   | -0.005 | 0.295 | -0.016 | 0.987 | 0.995 | 0.294 | -0.016 | 0.987 | 0.558 | 1.775 |

|         |        |       |        |       |       |       |        |       |       |       |
|---------|--------|-------|--------|-------|-------|-------|--------|-------|-------|-------|
| DGKG    | 0.026  | 0.295 | 0.087  | 0.93  | 1.026 | 0.303 | 0.086  | 0.931 | 0.575 | 1.831 |
| DGKE    | -0.341 | 0.3   | -1.14  | 0.254 | 0.711 | 0.213 | -1.359 | 0.174 | 0.395 | 1.278 |
| DGKD    | -0.119 | 0.295 | -0.404 | 0.686 | 0.887 | 0.262 | -0.429 | 0.668 | 0.497 | 1.583 |
| DGKB    | 0.154  | 0.296 | 0.519  | 0.604 | 1.166 | 0.345 | 0.481  | 0.63  | 0.653 | 2.084 |
| DGKA    | -0.787 | 0.31  | -2.538 | 0.011 | 0.455 | 0.141 | -3.86  | 0     | 0.248 | 0.836 |
| DGCR6L  | -0.404 | 0.299 | -1.349 | 0.177 | 0.668 | 0.2   | -1.662 | 0.096 | 0.372 | 1.2   |
| DGCR5   | 0.538  | 0.303 | 1.777  | 0.075 | 1.712 | 0.518 | 1.375  | 0.169 | 0.946 | 3.097 |
| DGCR2   | -0.25  | 0.298 | -0.84  | 0.401 | 0.779 | 0.232 | -0.954 | 0.34  | 0.434 | 1.396 |
| DGCR11  | 0.073  | 0.295 | 0.247  | 0.805 | 1.076 | 0.317 | 0.238  | 0.812 | 0.603 | 1.918 |
| DGAT1   | 0.477  | 0.302 | 1.579  | 0.114 | 1.612 | 0.487 | 1.255  | 0.209 | 0.891 | 2.914 |
| DFFB    | -0.415 | 0.302 | -1.374 | 0.17  | 0.66  | 0.2   | -1.703 | 0.089 | 0.365 | 1.194 |
| DFFA    | 0.459  | 0.3   | 1.527  | 0.127 | 1.582 | 0.475 | 1.225  | 0.221 | 0.878 | 2.85  |
| DEXI    | -0.271 | 0.298 | -0.911 | 0.362 | 0.762 | 0.227 | -1.047 | 0.295 | 0.425 | 1.366 |
| DET1    | -0.144 | 0.296 | -0.487 | 0.626 | 0.866 | 0.256 | -0.524 | 0.6   | 0.485 | 1.546 |
| DESI2   | 0.01   | 0.296 | 0.035  | 0.972 | 1.01  | 0.299 | 0.035  | 0.972 | 0.566 | 1.805 |
| DESI1   | -0.248 | 0.298 | -0.833 | 0.405 | 0.78  | 0.232 | -0.946 | 0.344 | 0.435 | 1.399 |
| DES     | 0.393  | 0.298 | 1.319  | 0.187 | 1.481 | 0.441 | 1.091  | 0.275 | 0.826 | 2.654 |
| DERL2   | 0.137  | 0.296 | 0.463  | 0.643 | 1.147 | 0.34  | 0.433  | 0.665 | 0.642 | 2.051 |
| DERL1   | 0.292  | 0.296 | 0.984  | 0.325 | 1.339 | 0.397 | 0.854  | 0.393 | 0.749 | 2.393 |
| DERA    | 0.001  | 0.296 | 0.005  | 0.996 | 1.001 | 0.296 | 0.005  | 0.996 | 0.561 | 1.787 |
| DEPTOR  | -0.134 | 0.296 | -0.451 | 0.652 | 0.875 | 0.259 | -0.483 | 0.629 | 0.489 | 1.564 |
| DEPP1   | -0.113 | 0.296 | -0.38  | 0.704 | 0.893 | 0.265 | -0.403 | 0.687 | 0.5   | 1.597 |
| DEPDC5  | 0.192  | 0.296 | 0.647  | 0.518 | 1.211 | 0.358 | 0.589  | 0.556 | 0.678 | 2.163 |
| DEPDC1  | 0.723  | 0.31  | 2.332  | 0.02  | 2.06  | 0.639 | 1.66   | 0.097 | 1.122 | 3.783 |
| DENR    | -0.079 | 0.295 | -0.268 | 0.789 | 0.924 | 0.273 | -0.279 | 0.78  | 0.518 | 1.648 |
| DENND6B | -0.225 | 0.298 | -0.756 | 0.45  | 0.799 | 0.238 | -0.848 | 0.397 | 0.446 | 1.431 |
| DENND5B | 0.274  | 0.297 | 0.925  | 0.355 | 1.316 | 0.39  | 0.809  | 0.419 | 0.736 | 2.352 |
| DENND5A | 0.171  | 0.296 | 0.579  | 0.563 | 1.187 | 0.351 | 0.532  | 0.595 | 0.665 | 2.118 |
| DENND4C | -0.522 | 0.303 | -1.724 | 0.085 | 0.593 | 0.18  | -2.265 | 0.024 | 0.328 | 1.074 |
| DENND4B | -0.109 | 0.296 | -0.369 | 0.712 | 0.897 | 0.265 | -0.39  | 0.696 | 0.502 | 1.6   |
| DENND4A | -0.375 | 0.303 | -1.238 | 0.216 | 0.688 | 0.208 | -1.502 | 0.133 | 0.38  | 1.244 |
| DENND3  | 0.026  | 0.296 | 0.087  | 0.93  | 1.026 | 0.304 | 0.086  | 0.931 | 0.574 | 1.834 |
| DENND2D | -0.084 | 0.298 | -0.281 | 0.779 | 0.92  | 0.274 | -0.293 | 0.77  | 0.513 | 1.648 |
| DENND2B | -0.107 | 0.296 | -0.361 | 0.718 | 0.898 | 0.266 | -0.381 | 0.703 | 0.503 | 1.606 |
| DENND2A | -0.097 | 0.295 | -0.328 | 0.743 | 0.908 | 0.268 | -0.344 | 0.731 | 0.509 | 1.62  |
| DENND1C | -0.474 | 0.3   | -1.581 | 0.114 | 0.623 | 0.187 | -2.022 | 0.043 | 0.346 | 1.12  |
| DENND1B | -0.17  | 0.296 | -0.575 | 0.566 | 0.844 | 0.25  | -0.626 | 0.531 | 0.472 | 1.507 |
| DENND1A | 0.692  | 0.31  | 2.234  | 0.025 | 1.998 | 0.619 | 1.612  | 0.107 | 1.089 | 3.665 |

|         |        |       |        |       |       |       |        |       |       |       |
|---------|--------|-------|--------|-------|-------|-------|--------|-------|-------|-------|
| DELEC1  | 0.127  | 0.297 | 0.427  | 0.669 | 1.135 | 0.338 | 0.401  | 0.688 | 0.634 | 2.034 |
| DELE1   | 0.013  | 0.295 | 0.043  | 0.966 | 1.013 | 0.299 | 0.042  | 0.966 | 0.568 | 1.807 |
| DEK     | 0.248  | 0.296 | 0.837  | 0.403 | 1.281 | 0.38  | 0.741  | 0.459 | 0.717 | 2.29  |
| DEGS1   | 0.063  | 0.296 | 0.214  | 0.831 | 1.065 | 0.316 | 0.207  | 0.836 | 0.596 | 1.904 |
| DEFB126 | 0.05   | 0.296 | 0.17   | 0.865 | 1.052 | 0.311 | 0.166  | 0.868 | 0.589 | 1.877 |
| DEFB1   | -0.087 | 0.295 | -0.296 | 0.767 | 0.916 | 0.27  | -0.31  | 0.757 | 0.514 | 1.634 |
| DEFA6   | -0.32  | 0.297 | -1.075 | 0.282 | 0.726 | 0.216 | -1.267 | 0.205 | 0.406 | 1.301 |
| DEFA5   | 0.401  | 0.3   | 1.339  | 0.181 | 1.494 | 0.448 | 1.103  | 0.27  | 0.83  | 2.687 |
| DEFA4   | -0.226 | 0.297 | -0.763 | 0.445 | 0.797 | 0.237 | -0.856 | 0.392 | 0.446 | 1.426 |
| DEF8    | 0.222  | 0.296 | 0.75   | 0.453 | 1.249 | 0.37  | 0.673  | 0.501 | 0.699 | 2.231 |
| DEF6    | -0.286 | 0.297 | -0.966 | 0.334 | 0.751 | 0.223 | -1.118 | 0.263 | 0.42  | 1.343 |
| DEDD    | -0.294 | 0.298 | -0.987 | 0.324 | 0.745 | 0.222 | -1.147 | 0.251 | 0.416 | 1.336 |
| DECR2   | 0.488  | 0.3   | 1.626  | 0.104 | 1.63  | 0.489 | 1.286  | 0.198 | 0.905 | 2.936 |
| DECR1   | 0.574  | 0.301 | 1.906  | 0.057 | 1.775 | 0.534 | 1.451  | 0.147 | 0.984 | 3.2   |
| DEAF1   | -0.405 | 0.3   | -1.35  | 0.177 | 0.667 | 0.2   | -1.664 | 0.096 | 0.371 | 1.2   |
| DDX60   | -0.298 | 0.298 | -1.001 | 0.317 | 0.742 | 0.221 | -1.166 | 0.244 | 0.414 | 1.331 |
| DDX6    | 0.669  | 0.307 | 2.184  | 0.029 | 1.953 | 0.599 | 1.592  | 0.111 | 1.071 | 3.561 |
| DDX58   | 0.181  | 0.296 | 0.613  | 0.54  | 1.199 | 0.355 | 0.56   | 0.575 | 0.671 | 2.142 |
| DDX56   | 0.662  | 0.306 | 2.165  | 0.03  | 1.938 | 0.592 | 1.583  | 0.113 | 1.065 | 3.528 |
| DDX54   | -0.175 | 0.298 | -0.586 | 0.558 | 0.84  | 0.25  | -0.64  | 0.522 | 0.468 | 1.507 |
| DDX52   | 0.455  | 0.303 | 1.503  | 0.133 | 1.577 | 0.478 | 1.207  | 0.227 | 0.871 | 2.855 |
| DDX51   | -0.057 | 0.295 | -0.192 | 0.847 | 0.945 | 0.279 | -0.198 | 0.843 | 0.53  | 1.686 |
| DDX50   | -0.02  | 0.296 | -0.067 | 0.947 | 0.98  | 0.29  | -0.068 | 0.946 | 0.549 | 1.752 |
| DDX49   | 0.474  | 0.302 | 1.568  | 0.117 | 1.606 | 0.485 | 1.249  | 0.212 | 0.888 | 2.904 |
| DDX46   | 0.197  | 0.296 | 0.664  | 0.507 | 1.217 | 0.361 | 0.603  | 0.547 | 0.681 | 2.175 |
| DDX43   | -0.107 | 0.297 | -0.36  | 0.719 | 0.899 | 0.267 | -0.379 | 0.704 | 0.502 | 1.608 |
| DDX42   | 0.725  | 0.315 | 2.305  | 0.021 | 2.065 | 0.65  | 1.64   | 0.101 | 1.115 | 3.826 |
| DDX41   | 0.264  | 0.296 | 0.89   | 0.373 | 1.302 | 0.386 | 0.783  | 0.434 | 0.728 | 2.327 |
| DDX4    | 0.239  | 0.296 | 0.807  | 0.42  | 1.27  | 0.376 | 0.718  | 0.473 | 0.711 | 2.27  |
| DDX3Y   | -0.642 | 0.306 | -2.096 | 0.036 | 0.526 | 0.161 | -2.94  | 0.003 | 0.288 | 0.959 |
| DDX3X   | -0.462 | 0.3   | -1.537 | 0.124 | 0.63  | 0.189 | -1.954 | 0.051 | 0.35  | 1.135 |
| DDX39A  | 0.333  | 0.301 | 1.107  | 0.268 | 1.396 | 0.42  | 0.942  | 0.346 | 0.774 | 2.517 |
| DDX31   | 0.242  | 0.296 | 0.816  | 0.415 | 1.274 | 0.377 | 0.725  | 0.469 | 0.712 | 2.277 |
| DDX28   | 0.464  | 0.3   | 1.549  | 0.121 | 1.591 | 0.477 | 1.239  | 0.215 | 0.884 | 2.862 |
| DDX27   | 0.425  | 0.303 | 1.403  | 0.161 | 1.529 | 0.463 | 1.143  | 0.253 | 0.845 | 2.767 |
| DDX25   | 0.241  | 0.296 | 0.815  | 0.415 | 1.273 | 0.377 | 0.724  | 0.469 | 0.712 | 2.275 |
| DDX24   | 0.266  | 0.298 | 0.892  | 0.372 | 1.304 | 0.388 | 0.784  | 0.433 | 0.728 | 2.337 |
| DDX23   | -0.184 | 0.296 | -0.62  | 0.535 | 0.832 | 0.247 | -0.68  | 0.496 | 0.465 | 1.488 |

|         |        |       |        |       |       |       |        |       |       |       |
|---------|--------|-------|--------|-------|-------|-------|--------|-------|-------|-------|
| DDX21   | 0.074  | 0.298 | 0.247  | 0.805 | 1.076 | 0.321 | 0.238  | 0.812 | 0.6   | 1.93  |
| DDX19A  | 0.412  | 0.3   | 1.375  | 0.169 | 1.51  | 0.452 | 1.127  | 0.26  | 0.839 | 2.715 |
| DDX18   | 0.677  | 0.31  | 2.185  | 0.029 | 1.968 | 0.609 | 1.588  | 0.112 | 1.072 | 3.611 |
| DDX17   | -0.149 | 0.296 | -0.502 | 0.616 | 0.862 | 0.255 | -0.542 | 0.588 | 0.482 | 1.541 |
| DDX11   | -0.245 | 0.298 | -0.824 | 0.41  | 0.783 | 0.233 | -0.934 | 0.35  | 0.437 | 1.402 |
| DDX10   | 0.268  | 0.297 | 0.904  | 0.366 | 1.307 | 0.388 | 0.793  | 0.428 | 0.731 | 2.338 |
| DDX1    | -0.603 | 0.304 | -1.985 | 0.047 | 0.547 | 0.166 | -2.724 | 0.006 | 0.302 | 0.992 |
| DDRGK1  | -0.242 | 0.296 | -0.818 | 0.413 | 0.785 | 0.233 | -0.926 | 0.355 | 0.439 | 1.403 |
| DDR2    | -0.644 | 0.304 | -2.121 | 0.034 | 0.525 | 0.159 | -2.977 | 0.003 | 0.29  | 0.952 |
| DDR1-DT | 0.449  | 0.3   | 1.498  | 0.134 | 1.567 | 0.469 | 1.207  | 0.228 | 0.871 | 2.818 |
| DDOST   | -0.613 | 0.306 | -2.007 | 0.045 | 0.542 | 0.166 | -2.769 | 0.006 | 0.298 | 0.986 |
| DDO     | -0.067 | 0.297 | -0.224 | 0.823 | 0.935 | 0.278 | -0.232 | 0.817 | 0.522 | 1.676 |
| DDN     | 0.396  | 0.3   | 1.323  | 0.186 | 1.486 | 0.445 | 1.092  | 0.275 | 0.826 | 2.674 |
| DDIT4   | 0.359  | 0.298 | 1.206  | 0.228 | 1.432 | 0.426 | 1.013  | 0.311 | 0.799 | 2.566 |
| DDIT3   | 0.187  | 0.298 | 0.627  | 0.53  | 1.206 | 0.36  | 0.572  | 0.567 | 0.672 | 2.163 |
| DDHD2   | -0.255 | 0.298 | -0.855 | 0.392 | 0.775 | 0.231 | -0.974 | 0.33  | 0.432 | 1.39  |
| DDC     | 0.272  | 0.298 | 0.913  | 0.361 | 1.312 | 0.39  | 0.8    | 0.424 | 0.732 | 2.351 |
| DDB2    | 0.014  | 0.3   | 0.047  | 0.963 | 1.014 | 0.304 | 0.047  | 0.963 | 0.563 | 1.826 |
| DDB1    | -0.122 | 0.296 | -0.414 | 0.679 | 0.885 | 0.262 | -0.44  | 0.66  | 0.495 | 1.581 |
| DDAH2   | 0.716  | 0.307 | 2.332  | 0.02  | 2.046 | 0.628 | 1.666  | 0.096 | 1.121 | 3.734 |
| DDAH1   | -0.206 | 0.3   | -0.685 | 0.493 | 0.814 | 0.244 | -0.761 | 0.447 | 0.452 | 1.466 |
| DDA1    | 0.272  | 0.297 | 0.916  | 0.36  | 1.312 | 0.389 | 0.802  | 0.423 | 0.734 | 2.346 |
| DCXR    | -0.208 | 0.296 | -0.701 | 0.483 | 0.812 | 0.241 | -0.78  | 0.436 | 0.454 | 1.452 |
| DCX     | -0.115 | 0.295 | -0.388 | 0.698 | 0.892 | 0.263 | -0.411 | 0.681 | 0.5   | 1.591 |
| DCUN1D4 | 0.694  | 0.306 | 2.264  | 0.024 | 2.001 | 0.613 | 1.633  | 0.103 | 1.098 | 3.649 |
| DCUN1D2 | 0.259  | 0.297 | 0.873  | 0.383 | 1.296 | 0.385 | 0.769  | 0.442 | 0.724 | 2.321 |
| DCUN1D1 | 0.671  | 0.303 | 2.214  | 0.027 | 1.955 | 0.592 | 1.613  | 0.107 | 1.08  | 3.541 |
| DCTPP1  | -0.181 | 0.298 | -0.609 | 0.542 | 0.834 | 0.248 | -0.668 | 0.504 | 0.465 | 1.495 |
| DCTN6   | -0.002 | 0.297 | -0.006 | 0.995 | 0.998 | 0.297 | -0.006 | 0.995 | 0.557 | 1.788 |
| DCTN5   | 0.811  | 0.315 | 2.573  | 0.01  | 2.249 | 0.709 | 1.763  | 0.078 | 1.213 | 4.17  |
| DCTN4   | -1.176 | 0.337 | -3.491 | 0     | 0.308 | 0.104 | -6.654 | 0     | 0.159 | 0.597 |
| DCTN3   | 0.205  | 0.296 | 0.691  | 0.49  | 1.227 | 0.363 | 0.625  | 0.532 | 0.687 | 2.192 |
| DCTN2   | -0.283 | 0.3   | -0.945 | 0.345 | 0.753 | 0.226 | -1.092 | 0.275 | 0.419 | 1.355 |
| DCTN1   | -0.144 | 0.296 | -0.488 | 0.625 | 0.865 | 0.256 | -0.525 | 0.599 | 0.485 | 1.545 |
| DCTD    | -1.271 | 0.346 | -3.67  | 0     | 0.281 | 0.097 | -7.405 | 0     | 0.142 | 0.553 |
| DCT     | -0.182 | 0.296 | -0.615 | 0.538 | 0.833 | 0.247 | -0.675 | 0.5   | 0.467 | 1.489 |
| DCSTAMP | 0.514  | 0.302 | 1.698  | 0.089 | 1.671 | 0.505 | 1.328  | 0.184 | 0.924 | 3.023 |
| DCPS    | -0.001 | 0.295 | -0.004 | 0.997 | 0.999 | 0.295 | -0.004 | 0.997 | 0.56  | 1.781 |



|         |        |       |        |       |       |       |        |       |       |       |
|---------|--------|-------|--------|-------|-------|-------|--------|-------|-------|-------|
| DCP2    | -0.215 | 0.296 | -0.726 | 0.468 | 0.806 | 0.239 | -0.81  | 0.418 | 0.451 | 1.442 |
| DCP1A   | -0.668 | 0.31  | -2.158 | 0.031 | 0.513 | 0.159 | -3.07  | 0.002 | 0.279 | 0.941 |
| DCN     | -0.864 | 0.315 | -2.744 | 0.006 | 0.422 | 0.133 | -4.358 | 0     | 0.228 | 0.781 |
| DCLRE1C | 1.13   | 0.329 | 3.438  | 0.001 | 3.097 | 1.018 | 2.06   | 0.039 | 1.626 | 5.899 |
| DCLRE1B | 0.598  | 0.303 | 1.971  | 0.049 | 1.818 | 0.551 | 1.484  | 0.138 | 1.003 | 3.293 |
| DCLRE1A | -0.12  | 0.296 | -0.405 | 0.685 | 0.887 | 0.263 | -0.431 | 0.667 | 0.496 | 1.585 |
| DCLK2   | 0.739  | 0.31  | 2.387  | 0.017 | 2.095 | 0.649 | 1.687  | 0.092 | 1.141 | 3.843 |
| DCLK1   | 0.064  | 0.295 | 0.217  | 0.829 | 1.066 | 0.315 | 0.21   | 0.834 | 0.597 | 1.902 |
| DCK     | -0.073 | 0.296 | -0.246 | 0.805 | 0.93  | 0.275 | -0.256 | 0.798 | 0.52  | 1.661 |
| DCHS2   | 0.135  | 0.295 | 0.456  | 0.649 | 1.144 | 0.338 | 0.426  | 0.67  | 0.641 | 2.041 |
| DCHS1   | 0.002  | 0.295 | 0.007  | 0.995 | 1.002 | 0.296 | 0.007  | 0.995 | 0.562 | 1.787 |
| DCC     | -0.256 | 0.298 | -0.861 | 0.389 | 0.774 | 0.23  | -0.981 | 0.327 | 0.432 | 1.387 |
| DCBLD2  | 0.35   | 0.298 | 1.174  | 0.24  | 1.418 | 0.422 | 0.991  | 0.322 | 0.791 | 2.542 |
| DCAKD   | -0.043 | 0.297 | -0.145 | 0.885 | 0.958 | 0.284 | -0.148 | 0.882 | 0.535 | 1.714 |
| DCAF8   | -0.335 | 0.298 | -1.127 | 0.26  | 0.715 | 0.213 | -1.339 | 0.181 | 0.399 | 1.281 |
| DCAF7   | 0.569  | 0.306 | 1.862  | 0.063 | 1.766 | 0.54  | 1.42   | 0.156 | 0.971 | 3.215 |
| DCAF6   | 0.118  | 0.296 | 0.4    | 0.689 | 1.126 | 0.333 | 0.377  | 0.706 | 0.631 | 2.009 |
| DCAF4   | 0.023  | 0.296 | 0.077  | 0.939 | 1.023 | 0.303 | 0.076  | 0.939 | 0.573 | 1.827 |
| DCAF17  | 0.742  | 0.306 | 2.424  | 0.015 | 2.1   | 0.643 | 1.711  | 0.087 | 1.153 | 3.826 |
| DCAF16  | -0.159 | 0.296 | -0.539 | 0.59  | 0.853 | 0.252 | -0.584 | 0.559 | 0.478 | 1.522 |
| DCAF15  | -0.673 | 0.31  | -2.169 | 0.03  | 0.51  | 0.158 | -3.093 | 0.002 | 0.278 | 0.937 |
| DCAF13  | 0.233  | 0.296 | 0.787  | 0.431 | 1.263 | 0.374 | 0.702  | 0.483 | 0.707 | 2.256 |
| DCAF11  | 0.288  | 0.298 | 0.966  | 0.334 | 1.333 | 0.397 | 0.839  | 0.401 | 0.744 | 2.391 |
| DCAF10  | 0.121  | 0.296 | 0.41   | 0.682 | 1.129 | 0.334 | 0.386  | 0.699 | 0.632 | 2.016 |
| DCAF1   | 0.361  | 0.297 | 1.215  | 0.224 | 1.435 | 0.426 | 1.02   | 0.308 | 0.801 | 2.569 |
| DBT     | 0.158  | 0.299 | 0.529  | 0.597 | 1.171 | 0.35  | 0.489  | 0.625 | 0.652 | 2.103 |
| DBR1    | 0.133  | 0.295 | 0.449  | 0.653 | 1.142 | 0.337 | 0.421  | 0.674 | 0.64  | 2.036 |
| DBP     | -0.544 | 0.312 | -1.747 | 0.081 | 0.58  | 0.181 | -2.322 | 0.02  | 0.315 | 1.069 |
| DBNDD1  | 0.142  | 0.296 | 0.481  | 0.63  | 1.153 | 0.341 | 0.449  | 0.654 | 0.646 | 2.059 |
| DBN1    | 0.663  | 0.306 | 2.17   | 0.03  | 1.941 | 0.593 | 1.586  | 0.113 | 1.066 | 3.534 |
| DBI     | 0.202  | 0.296 | 0.683  | 0.495 | 1.224 | 0.363 | 0.618  | 0.537 | 0.685 | 2.188 |
| DBH     | -0.194 | 0.296 | -0.656 | 0.512 | 0.823 | 0.244 | -0.724 | 0.469 | 0.461 | 1.472 |
| DBF4B   | 0.225  | 0.299 | 0.752  | 0.452 | 1.252 | 0.375 | 0.673  | 0.501 | 0.697 | 2.251 |
| DBF4    | 0.28   | 0.296 | 0.944  | 0.345 | 1.323 | 0.392 | 0.824  | 0.41  | 0.74  | 2.363 |
| DAZL    | 0.113  | 0.295 | 0.383  | 0.701 | 1.12  | 0.331 | 0.363  | 0.717 | 0.628 | 1.998 |
| DAZAP2  | -0.854 | 0.315 | -2.713 | 0.007 | 0.426 | 0.134 | -4.285 | 0     | 0.23  | 0.789 |
| DAZAP1  | 0.602  | 0.304 | 1.981  | 0.048 | 1.826 | 0.555 | 1.488  | 0.137 | 1.006 | 3.312 |
| DAXX    | -0.334 | 0.298 | -1.122 | 0.262 | 0.716 | 0.213 | -1.332 | 0.183 | 0.399 | 1.284 |

|         |        |       |        |       |       |       |        |       |       |       |
|---------|--------|-------|--------|-------|-------|-------|--------|-------|-------|-------|
| DARS2   | 0.354  | 0.298 | 1.189  | 0.235 | 1.424 | 0.424 | 1.001  | 0.317 | 0.795 | 2.552 |
| DARS1   | 0.166  | 0.295 | 0.562  | 0.574 | 1.181 | 0.349 | 0.518  | 0.605 | 0.662 | 2.106 |
| DAPP1   | 0.13   | 0.299 | 0.435  | 0.663 | 1.139 | 0.341 | 0.408  | 0.683 | 0.634 | 2.048 |
| DAPK2   | 0.677  | 0.303 | 2.23   | 0.026 | 1.967 | 0.597 | 1.62   | 0.105 | 1.085 | 3.566 |
| DAPK1   | 0.523  | 0.306 | 1.709  | 0.087 | 1.687 | 0.516 | 1.331  | 0.183 | 0.926 | 3.073 |
| DAP3    | -0.209 | 0.296 | -0.704 | 0.482 | 0.812 | 0.241 | -0.782 | 0.434 | 0.454 | 1.451 |
| DAP     | -0.177 | 0.296 | -0.599 | 0.549 | 0.837 | 0.248 | -0.656 | 0.512 | 0.469 | 1.496 |
| DAO     | 0.928  | 0.321 | 2.894  | 0.004 | 2.528 | 0.81  | 1.886  | 0.059 | 1.349 | 4.739 |
| DALRD3  | -0.348 | 0.303 | -1.146 | 0.252 | 0.706 | 0.214 | -1.37  | 0.171 | 0.39  | 1.28  |
| DAGLA   | -0.074 | 0.295 | -0.252 | 0.801 | 0.928 | 0.274 | -0.262 | 0.794 | 0.52  | 1.656 |
| DAG1    | -0.305 | 0.297 | -1.028 | 0.304 | 0.737 | 0.219 | -1.201 | 0.23  | 0.412 | 1.319 |
| DAD1    | 0.381  | 0.298 | 1.278  | 0.201 | 1.464 | 0.437 | 1.062  | 0.288 | 0.816 | 2.628 |
| DACT1   | -0.481 | 0.3   | -1.602 | 0.109 | 0.618 | 0.186 | -2.057 | 0.04  | 0.343 | 1.113 |
| DACH1   | 0.275  | 0.299 | 0.921  | 0.357 | 1.316 | 0.393 | 0.805  | 0.421 | 0.733 | 2.364 |
| DAB2    | -0.786 | 0.308 | -2.554 | 0.011 | 0.456 | 0.14  | -3.88  | 0     | 0.249 | 0.833 |
| DAB1    | -0.373 | 0.3   | -1.245 | 0.213 | 0.689 | 0.206 | -1.509 | 0.131 | 0.383 | 1.239 |
| DAAM2   | -0.141 | 0.295 | -0.477 | 0.634 | 0.869 | 0.257 | -0.512 | 0.609 | 0.487 | 1.55  |
| DAAM1   | 0.549  | 0.302 | 1.815  | 0.069 | 1.732 | 0.524 | 1.397  | 0.162 | 0.957 | 3.133 |
| CZIB    | -0.01  | 0.295 | -0.033 | 0.974 | 0.99  | 0.292 | -0.033 | 0.974 | 0.556 | 1.766 |
| CYTL1   | -0.989 | 0.328 | -3.019 | 0.003 | 0.372 | 0.122 | -5.155 | 0     | 0.196 | 0.707 |
| CYTIP   | -0.454 | 0.303 | -1.501 | 0.133 | 0.635 | 0.192 | -1.9   | 0.057 | 0.351 | 1.149 |
| CYTH4   | -0.01  | 0.295 | -0.034 | 0.973 | 0.99  | 0.293 | -0.034 | 0.973 | 0.555 | 1.767 |
| CYTH3   | 0.327  | 0.299 | 1.091  | 0.275 | 1.387 | 0.415 | 0.931  | 0.352 | 0.771 | 2.494 |
| CYTH2   | -0.349 | 0.303 | -1.151 | 0.25  | 0.705 | 0.214 | -1.377 | 0.168 | 0.389 | 1.278 |
| CYTH1   | 0.307  | 0.298 | 1.031  | 0.302 | 1.359 | 0.404 | 0.888  | 0.374 | 0.759 | 2.436 |
| CYSLTR2 | -0.5   | 0.302 | -1.654 | 0.098 | 0.606 | 0.183 | -2.147 | 0.032 | 0.335 | 1.097 |
| CYSLTR1 | 0.418  | 0.3   | 1.395  | 0.163 | 1.519 | 0.455 | 1.14   | 0.254 | 0.844 | 2.732 |
| CYRIB   | 0.181  | 0.297 | 0.61   | 0.542 | 1.198 | 0.356 | 0.558  | 0.577 | 0.67  | 2.144 |
| CYRIA   | 0.329  | 0.3   | 1.095  | 0.274 | 1.389 | 0.417 | 0.933  | 0.351 | 0.771 | 2.504 |
| CYREN   | 0.187  | 0.296 | 0.632  | 0.528 | 1.206 | 0.357 | 0.576  | 0.565 | 0.675 | 2.156 |
| CYP7B1  | 0.4    | 0.298 | 1.345  | 0.179 | 1.492 | 0.444 | 1.108  | 0.268 | 0.833 | 2.675 |
| CYP7A1  | -0.135 | 0.296 | -0.456 | 0.649 | 0.874 | 0.258 | -0.488 | 0.626 | 0.49  | 1.56  |
| CYP4F8  | 0.648  | 0.306 | 2.118  | 0.034 | 1.912 | 0.585 | 1.559  | 0.119 | 1.049 | 3.483 |
| CYP4F3  | -0.493 | 0.302 | -1.631 | 0.103 | 0.611 | 0.185 | -2.108 | 0.035 | 0.338 | 1.105 |
| CYP4F2  | 0.19   | 0.295 | 0.644  | 0.519 | 1.21  | 0.357 | 0.587  | 0.557 | 0.678 | 2.158 |
| CYP4F12 | -0.606 | 0.31  | -1.955 | 0.051 | 0.546 | 0.169 | -2.688 | 0.007 | 0.297 | 1.001 |
| CYP4F11 | -0.179 | 0.299 | -0.599 | 0.549 | 0.836 | 0.25  | -0.657 | 0.511 | 0.465 | 1.503 |
| CYP4B1  | 0.291  | 0.299 | 0.973  | 0.331 | 1.338 | 0.4   | 0.844  | 0.399 | 0.744 | 2.403 |

|               |        |       |        |       |       |       |        |       |       |       |
|---------------|--------|-------|--------|-------|-------|-------|--------|-------|-------|-------|
| CYP4A11       | -0.081 | 0.296 | -0.275 | 0.783 | 0.922 | 0.273 | -0.287 | 0.774 | 0.516 | 1.645 |
| CYP46A1       | -0.156 | 0.296 | -0.527 | 0.598 | 0.855 | 0.253 | -0.571 | 0.568 | 0.479 | 1.529 |
| CYP3A7-CYP3A4 | 0.108  | 0.295 | 0.367  | 0.713 | 1.115 | 0.329 | 0.348  | 0.728 | 0.625 | 1.989 |
| CYP3A5        | 0.103  | 0.295 | 0.35   | 0.726 | 1.109 | 0.328 | 0.333  | 0.739 | 0.622 | 1.978 |
| CYP3A43       | -0.574 | 0.303 | -1.893 | 0.058 | 0.563 | 0.171 | -2.557 | 0.011 | 0.311 | 1.021 |
| CYP3A4        | 0.394  | 0.302 | 1.303  | 0.193 | 1.483 | 0.448 | 1.077  | 0.282 | 0.82  | 2.682 |
| CYP39A1       | -0.271 | 0.3   | -0.906 | 0.365 | 0.762 | 0.228 | -1.041 | 0.298 | 0.424 | 1.371 |
| CYP2W1        | 0.256  | 0.299 | 0.858  | 0.391 | 1.292 | 0.386 | 0.757  | 0.449 | 0.72  | 2.319 |
| CYP2R1        | 0.275  | 0.296 | 0.93   | 0.352 | 1.317 | 0.39  | 0.813  | 0.416 | 0.737 | 2.354 |
| CYP2J2        | 0.575  | 0.303 | 1.9    | 0.057 | 1.778 | 0.539 | 1.444  | 0.149 | 0.982 | 3.22  |
| CYP2F1        | 0.127  | 0.295 | 0.43   | 0.667 | 1.135 | 0.335 | 0.403  | 0.687 | 0.636 | 2.025 |
| CYP2E1        | 0.397  | 0.304 | 1.306  | 0.191 | 1.487 | 0.451 | 1.078  | 0.281 | 0.82  | 2.696 |
| CYP2D6        | -0.339 | 0.298 | -1.139 | 0.255 | 0.712 | 0.212 | -1.356 | 0.175 | 0.398 | 1.277 |
| CYP2C9        | 0.49   | 0.302 | 1.621  | 0.105 | 1.632 | 0.494 | 1.281  | 0.2   | 0.903 | 2.952 |
| CYP2C8        | -0.292 | 0.298 | -0.981 | 0.326 | 0.747 | 0.222 | -1.139 | 0.255 | 0.417 | 1.338 |
| CYP2C19       | 0.119  | 0.295 | 0.402  | 0.687 | 1.126 | 0.333 | 0.379  | 0.704 | 0.631 | 2.009 |
| CYP2C18       | -0.102 | 0.296 | -0.345 | 0.73  | 0.903 | 0.267 | -0.363 | 0.716 | 0.506 | 1.612 |
| CYP2B7P       | -0.239 | 0.298 | -0.804 | 0.422 | 0.787 | 0.234 | -0.908 | 0.364 | 0.439 | 1.411 |
| CYP2B6        | -0.332 | 0.3   | -1.107 | 0.268 | 0.718 | 0.215 | -1.312 | 0.189 | 0.399 | 1.291 |
| CYP2A7P1      | -0.574 | 0.303 | -1.895 | 0.058 | 0.563 | 0.171 | -2.56  | 0.01  | 0.311 | 1.02  |
| CYP2A7        | -0.333 | 0.298 | -1.117 | 0.264 | 0.717 | 0.214 | -1.325 | 0.185 | 0.399 | 1.286 |
| CYP2A6        | 0.121  | 0.297 | 0.406  | 0.685 | 1.128 | 0.335 | 0.383  | 0.702 | 0.631 | 2.018 |
| CYP2A13       | -0.097 | 0.296 | -0.328 | 0.743 | 0.908 | 0.268 | -0.345 | 0.73  | 0.508 | 1.62  |
| CYP27B1       | -0.265 | 0.297 | -0.889 | 0.374 | 0.768 | 0.228 | -1.018 | 0.309 | 0.428 | 1.375 |
| CYP27A1       | -0.143 | 0.295 | -0.484 | 0.629 | 0.867 | 0.256 | -0.52  | 0.603 | 0.486 | 1.547 |
| CYP26B1       | -0.211 | 0.296 | -0.713 | 0.476 | 0.81  | 0.24  | -0.794 | 0.427 | 0.453 | 1.447 |
| CYP26A1       | -0.265 | 0.298 | -0.89  | 0.374 | 0.767 | 0.228 | -1.019 | 0.308 | 0.428 | 1.375 |
| CYP24A1       | 0.405  | 0.3   | 1.349  | 0.177 | 1.499 | 0.45  | 1.109  | 0.267 | 0.832 | 2.698 |
| CYP20A1       | -0.473 | 0.301 | -1.573 | 0.116 | 0.623 | 0.187 | -2.011 | 0.044 | 0.346 | 1.123 |
| CYP1B1        | -0.473 | 0.299 | -1.582 | 0.114 | 0.623 | 0.186 | -2.023 | 0.043 | 0.347 | 1.12  |
| CYP1A2        | 0.245  | 0.297 | 0.826  | 0.409 | 1.278 | 0.379 | 0.732  | 0.464 | 0.714 | 2.285 |
| CYP1A1        | 0.063  | 0.296 | 0.213  | 0.831 | 1.065 | 0.316 | 0.207  | 0.836 | 0.596 | 1.904 |
| CYP19A1       | 0.264  | 0.298 | 0.886  | 0.375 | 1.302 | 0.388 | 0.779  | 0.436 | 0.726 | 2.336 |
| CYP17A1       | -0.208 | 0.296 | -0.702 | 0.483 | 0.812 | 0.241 | -0.781 | 0.435 | 0.454 | 1.452 |
| CYP11B2       | 0.026  | 0.295 | 0.089  | 0.929 | 1.027 | 0.303 | 0.088  | 0.93  | 0.575 | 1.832 |
| CYP11B1       | 0.175  | 0.296 | 0.59   | 0.555 | 1.191 | 0.353 | 0.541  | 0.588 | 0.666 | 2.129 |
| CYP11A1       | -0.195 | 0.296 | -0.66  | 0.51  | 0.823 | 0.243 | -0.728 | 0.466 | 0.461 | 1.469 |
| CYLD          | -0.314 | 0.298 | -1.056 | 0.291 | 0.73  | 0.217 | -1.241 | 0.215 | 0.408 | 1.309 |

|          |        |       |        |       |       |       |        |       |       |       |
|----------|--------|-------|--------|-------|-------|-------|--------|-------|-------|-------|
| CYLC2    | 0.074  | 0.295 | 0.251  | 0.802 | 1.077 | 0.318 | 0.242  | 0.809 | 0.604 | 1.921 |
| CYLC1    | -0.25  | 0.298 | -0.84  | 0.401 | 0.778 | 0.232 | -0.954 | 0.34  | 0.434 | 1.397 |
| CYHR1    | 0.013  | 0.296 | 0.043  | 0.966 | 1.013 | 0.3   | 0.043  | 0.966 | 0.567 | 1.81  |
| CYFIP2   | 0.126  | 0.296 | 0.425  | 0.671 | 1.134 | 0.335 | 0.4    | 0.689 | 0.635 | 2.025 |
| CYFIP1   | 0.107  | 0.295 | 0.362  | 0.718 | 1.113 | 0.328 | 0.343  | 0.732 | 0.624 | 1.984 |
| CYCS     | 0.442  | 0.303 | 1.46   | 0.144 | 1.556 | 0.471 | 1.18   | 0.238 | 0.859 | 2.817 |
| CYC1     | 0.245  | 0.296 | 0.827  | 0.408 | 1.277 | 0.378 | 0.734  | 0.463 | 0.715 | 2.282 |
| CYBRD1   | -0.29  | 0.298 | -0.974 | 0.33  | 0.748 | 0.223 | -1.129 | 0.259 | 0.418 | 1.341 |
| CYBC1    | 0.092  | 0.295 | 0.31   | 0.756 | 1.096 | 0.324 | 0.297  | 0.767 | 0.614 | 1.956 |
| CYBB     | 0.135  | 0.296 | 0.455  | 0.649 | 1.144 | 0.338 | 0.426  | 0.67  | 0.641 | 2.042 |
| CYBA     | 0.166  | 0.296 | 0.56   | 0.575 | 1.181 | 0.35  | 0.516  | 0.606 | 0.66  | 2.111 |
| CYB5R4   | 0.159  | 0.296 | 0.536  | 0.592 | 1.172 | 0.347 | 0.495  | 0.62  | 0.656 | 2.094 |
| CYB5R3   | 0.017  | 0.295 | 0.058  | 0.954 | 1.017 | 0.3   | 0.057  | 0.954 | 0.57  | 1.815 |
| CYB5R2   | 0.104  | 0.295 | 0.351  | 0.725 | 1.109 | 0.328 | 0.334  | 0.739 | 0.622 | 1.979 |
| CYB5R1   | -0.485 | 0.306 | -1.587 | 0.113 | 0.616 | 0.188 | -2.042 | 0.041 | 0.338 | 1.121 |
| CYB5B    | 0.697  | 0.303 | 2.3    | 0.021 | 2.008 | 0.609 | 1.656  | 0.098 | 1.109 | 3.638 |
| CYB5A    | 0.422  | 0.299 | 1.414  | 0.157 | 1.526 | 0.456 | 1.154  | 0.249 | 0.85  | 2.74  |
| CYB561D2 | -0.474 | 0.303 | -1.566 | 0.117 | 0.623 | 0.188 | -2.004 | 0.045 | 0.344 | 1.126 |
| CYB561   | 0.236  | 0.296 | 0.797  | 0.425 | 1.266 | 0.375 | 0.71   | 0.478 | 0.709 | 2.264 |
| CXXC4    | 0.343  | 0.298 | 1.153  | 0.249 | 1.409 | 0.42  | 0.976  | 0.329 | 0.786 | 2.526 |
| CXXC1    | -0.526 | 0.302 | -1.743 | 0.081 | 0.591 | 0.178 | -2.293 | 0.022 | 0.327 | 1.068 |
| CXorf56  | 0.878  | 0.316 | 2.782  | 0.005 | 2.406 | 0.759 | 1.852  | 0.064 | 1.296 | 4.466 |
| CXCR6    | -0.128 | 0.296 | -0.434 | 0.664 | 0.88  | 0.26  | -0.463 | 0.643 | 0.493 | 1.57  |
| CXCR5    | 0.073  | 0.295 | 0.247  | 0.805 | 1.076 | 0.318 | 0.238  | 0.812 | 0.603 | 1.919 |
| CXCR4    | -0.035 | 0.296 | -0.12  | 0.905 | 0.965 | 0.285 | -0.122 | 0.903 | 0.541 | 1.723 |
| CXCR3    | 0.135  | 0.296 | 0.457  | 0.648 | 1.145 | 0.339 | 0.427  | 0.669 | 0.64  | 2.047 |
| CXCR2    | -0.107 | 0.296 | -0.361 | 0.718 | 0.899 | 0.266 | -0.381 | 0.703 | 0.503 | 1.605 |
| CXCR1    | -0.041 | 0.298 | -0.138 | 0.89  | 0.96  | 0.286 | -0.141 | 0.888 | 0.535 | 1.722 |
| CXCL9    | 0.332  | 0.3   | 1.107  | 0.268 | 1.394 | 0.418 | 0.942  | 0.346 | 0.774 | 2.511 |
| CXCL8    | 0.219  | 0.295 | 0.74   | 0.459 | 1.245 | 0.368 | 0.665  | 0.506 | 0.697 | 2.221 |
| CXCL6    | 0.05   | 0.295 | 0.17   | 0.865 | 1.051 | 0.31  | 0.165  | 0.869 | 0.59  | 1.875 |
| CXCL5    | 0.216  | 0.296 | 0.73   | 0.465 | 1.241 | 0.368 | 0.657  | 0.511 | 0.695 | 2.218 |
| CXCL3    | 0.277  | 0.296 | 0.934  | 0.35  | 1.319 | 0.391 | 0.816  | 0.415 | 0.738 | 2.357 |
| CXCL2    | -0.48  | 0.303 | -1.586 | 0.113 | 0.619 | 0.187 | -2.036 | 0.042 | 0.342 | 1.12  |
| CXCL14   | -0.392 | 0.3   | -1.308 | 0.191 | 0.676 | 0.202 | -1.601 | 0.109 | 0.376 | 1.216 |
| CXCL13   | -0.59  | 0.303 | -1.948 | 0.051 | 0.554 | 0.168 | -2.655 | 0.008 | 0.306 | 1.004 |
| CXCL12   | -1.001 | 0.321 | -3.12  | 0.002 | 0.368 | 0.118 | -5.364 | 0     | 0.196 | 0.689 |
| CXCL11   | 0.139  | 0.297 | 0.468  | 0.639 | 1.149 | 0.341 | 0.437  | 0.662 | 0.642 | 2.056 |

|         |        |       |        |       |       |       |        |       |       |       |
|---------|--------|-------|--------|-------|-------|-------|--------|-------|-------|-------|
| CXCL10  | 0.322  | 0.298 | 1.082  | 0.279 | 1.381 | 0.411 | 0.925  | 0.355 | 0.77  | 2.475 |
| CXCL1   | -0.28  | 0.297 | -0.942 | 0.346 | 0.756 | 0.225 | -1.087 | 0.277 | 0.422 | 1.353 |
| CXADR   | 0.438  | 0.3   | 1.463  | 0.143 | 1.55  | 0.465 | 1.185  | 0.236 | 0.862 | 2.789 |
| CX3CR1  | -1.015 | 0.328 | -3.096 | 0.002 | 0.362 | 0.119 | -5.366 | 0     | 0.191 | 0.689 |
| CX3CL1  | -0.035 | 0.296 | -0.119 | 0.905 | 0.965 | 0.286 | -0.121 | 0.904 | 0.54  | 1.725 |
| CWH43   | 0.341  | 0.298 | 1.144  | 0.253 | 1.406 | 0.418 | 0.97   | 0.332 | 0.784 | 2.519 |
| CWF19L1 | -0.216 | 0.3   | -0.719 | 0.472 | 0.806 | 0.242 | -0.803 | 0.422 | 0.447 | 1.451 |
| CWC25   | 0.139  | 0.298 | 0.468  | 0.64  | 1.15  | 0.342 | 0.437  | 0.662 | 0.641 | 2.061 |
| CUZD1   | -0.107 | 0.297 | -0.362 | 0.717 | 0.898 | 0.266 | -0.382 | 0.702 | 0.502 | 1.606 |
| CUX2    | -0.217 | 0.296 | -0.732 | 0.464 | 0.805 | 0.239 | -0.817 | 0.414 | 0.45  | 1.439 |
| CUX1    | 0.079  | 0.295 | 0.267  | 0.79  | 1.082 | 0.319 | 0.257  | 0.797 | 0.607 | 1.93  |
| CUTC    | 0.409  | 0.298 | 1.371  | 0.17  | 1.505 | 0.448 | 1.126  | 0.26  | 0.839 | 2.698 |
| CUTA    | 0.283  | 0.297 | 0.955  | 0.34  | 1.328 | 0.394 | 0.832  | 0.406 | 0.742 | 2.375 |
| CUL9    | 0.297  | 0.297 | 0.999  | 0.318 | 1.345 | 0.399 | 0.864  | 0.387 | 0.752 | 2.407 |
| CUL7    | 0.254  | 0.298 | 0.853  | 0.394 | 1.289 | 0.384 | 0.753  | 0.451 | 0.719 | 2.313 |
| CUL5    | -0.447 | 0.301 | -1.488 | 0.137 | 0.639 | 0.192 | -1.876 | 0.061 | 0.355 | 1.153 |
| CUL4B   | -0.595 | 0.306 | -1.947 | 0.052 | 0.552 | 0.169 | -2.66  | 0.008 | 0.303 | 1.004 |
| CUL4A   | 0.186  | 0.296 | 0.627  | 0.531 | 1.204 | 0.356 | 0.572  | 0.567 | 0.674 | 2.151 |
| CUL3    | -0.272 | 0.298 | -0.913 | 0.361 | 0.762 | 0.227 | -1.049 | 0.294 | 0.425 | 1.365 |
| CUL2    | 0.714  | 0.31  | 2.305  | 0.021 | 2.042 | 0.632 | 1.648  | 0.099 | 1.113 | 3.746 |
| CUL1    | -0.42  | 0.302 | -1.391 | 0.164 | 0.657 | 0.199 | -1.728 | 0.084 | 0.363 | 1.188 |
| CUEDC2  | 0.273  | 0.296 | 0.922  | 0.356 | 1.314 | 0.39  | 0.807  | 0.42  | 0.735 | 2.35  |
| CUEDC1  | 0.576  | 0.303 | 1.903  | 0.057 | 1.78  | 0.539 | 1.446  | 0.148 | 0.983 | 3.223 |
| CUBN    | -0.153 | 0.296 | -0.516 | 0.606 | 0.858 | 0.254 | -0.557 | 0.577 | 0.481 | 1.533 |
| CTXND1  | -0.103 | 0.296 | -0.347 | 0.728 | 0.902 | 0.267 | -0.366 | 0.714 | 0.505 | 1.613 |
| CTTN    | 0.473  | 0.302 | 1.566  | 0.117 | 1.605 | 0.485 | 1.248  | 0.212 | 0.888 | 2.902 |
| CTSZ    | 0.671  | 0.306 | 2.193  | 0.028 | 1.955 | 0.598 | 1.598  | 0.11  | 1.074 | 3.561 |
| CTSW    | -0.729 | 0.31  | -2.352 | 0.019 | 0.482 | 0.149 | -3.463 | 0.001 | 0.263 | 0.885 |
| CTSV    | 0.713  | 0.306 | 2.33   | 0.02  | 2.039 | 0.624 | 1.666  | 0.096 | 1.12  | 3.714 |
| CTSS    | -0.146 | 0.296 | -0.494 | 0.622 | 0.864 | 0.256 | -0.531 | 0.595 | 0.484 | 1.543 |
| CTSO    | -0.542 | 0.306 | -1.772 | 0.076 | 0.582 | 0.178 | -2.351 | 0.019 | 0.32  | 1.059 |
| CTSL    | 0.589  | 0.306 | 1.927  | 0.054 | 1.802 | 0.551 | 1.456  | 0.145 | 0.99  | 3.28  |
| CTSK    | -0.596 | 0.302 | -1.97  | 0.049 | 0.551 | 0.167 | -2.693 | 0.007 | 0.305 | 0.997 |
| CTSH    | -0.096 | 0.296 | -0.325 | 0.746 | 0.908 | 0.269 | -0.341 | 0.733 | 0.509 | 1.623 |
| CTSG    | 0.039  | 0.295 | 0.132  | 0.895 | 1.04  | 0.307 | 0.129  | 0.897 | 0.583 | 1.855 |
| CTSF    | -0.397 | 0.302 | -1.312 | 0.189 | 0.672 | 0.203 | -1.611 | 0.107 | 0.372 | 1.216 |
| CTSE    | 0.241  | 0.296 | 0.813  | 0.416 | 1.272 | 0.377 | 0.723  | 0.47  | 0.712 | 2.273 |
| CTSD    | 0.135  | 0.295 | 0.456  | 0.648 | 1.144 | 0.338 | 0.427  | 0.669 | 0.641 | 2.042 |

|              |        |       |        |       |       |       |        |       |       |       |
|--------------|--------|-------|--------|-------|-------|-------|--------|-------|-------|-------|
| CTSC         | 0.324  | 0.298 | 1.09   | 0.276 | 1.383 | 0.412 | 0.931  | 0.352 | 0.772 | 2.479 |
| CTSB         | 0.134  | 0.297 | 0.452  | 0.651 | 1.144 | 0.339 | 0.423  | 0.672 | 0.639 | 2.045 |
| CTSA         | 0.02   | 0.296 | 0.068  | 0.946 | 1.02  | 0.302 | 0.067  | 0.946 | 0.571 | 1.822 |
| CTRL         | -0.117 | 0.296 | -0.394 | 0.693 | 0.89  | 0.263 | -0.418 | 0.676 | 0.498 | 1.59  |
| CTRC         | -0.185 | 0.298 | -0.622 | 0.534 | 0.831 | 0.247 | -0.684 | 0.494 | 0.464 | 1.489 |
| CTRB2        | -0.25  | 0.297 | -0.844 | 0.399 | 0.779 | 0.231 | -0.959 | 0.338 | 0.435 | 1.392 |
| CTR9         | 0.005  | 0.296 | 0.018  | 0.986 | 1.005 | 0.297 | 0.018  | 0.986 | 0.563 | 1.794 |
| CTPS2        | 0.849  | 0.315 | 2.696  | 0.007 | 2.337 | 0.736 | 1.817  | 0.069 | 1.261 | 4.332 |
| CTPS1        | 0.151  | 0.295 | 0.511  | 0.61  | 1.163 | 0.343 | 0.474  | 0.635 | 0.652 | 2.075 |
| CTNS         | -0.391 | 0.299 | -1.307 | 0.191 | 0.676 | 0.202 | -1.6   | 0.11  | 0.377 | 1.215 |
| CTNND2       | -0.05  | 0.296 | -0.17  | 0.865 | 0.951 | 0.281 | -0.174 | 0.862 | 0.532 | 1.698 |
| CTNNBL1      | -0.158 | 0.296 | -0.534 | 0.593 | 0.854 | 0.253 | -0.579 | 0.563 | 0.478 | 1.525 |
| CTNNBIP1     | 0.383  | 0.299 | 1.283  | 0.2   | 1.467 | 0.438 | 1.066  | 0.287 | 0.817 | 2.633 |
| CTNNB1       | 0.001  | 0.295 | 0.002  | 0.998 | 1.001 | 0.296 | 0.002  | 0.998 | 0.561 | 1.785 |
| CTNNAL1      | -0.213 | 0.296 | -0.72  | 0.472 | 0.808 | 0.239 | -0.802 | 0.423 | 0.453 | 1.443 |
| CTNNA3       | -0.12  | 0.295 | -0.406 | 0.685 | 0.887 | 0.262 | -0.431 | 0.666 | 0.497 | 1.582 |
| CTNNA2       | -0.185 | 0.296 | -0.624 | 0.532 | 0.831 | 0.246 | -0.686 | 0.493 | 0.465 | 1.486 |
| CTNNA1       | 0.056  | 0.295 | 0.19   | 0.849 | 1.058 | 0.312 | 0.185  | 0.853 | 0.593 | 1.886 |
| CTLA4        | 0.094  | 0.295 | 0.318  | 0.751 | 1.098 | 0.324 | 0.303  | 0.762 | 0.616 | 1.96  |
| CTIF         | -0.558 | 0.3   | -1.855 | 0.064 | 0.573 | 0.172 | -2.484 | 0.013 | 0.318 | 1.032 |
| CTH          | 0.056  | 0.295 | 0.191  | 0.848 | 1.058 | 0.313 | 0.186  | 0.853 | 0.593 | 1.888 |
| CTF1         | -0.579 | 0.306 | -1.893 | 0.058 | 0.561 | 0.171 | -2.564 | 0.01  | 0.308 | 1.021 |
| CTDSPL       | -1.118 | 0.336 | -3.328 | 0.001 | 0.327 | 0.11  | -6.128 | 0     | 0.169 | 0.632 |
| CTDSP2       | -0.524 | 0.302 | -1.736 | 0.083 | 0.592 | 0.179 | -2.281 | 0.023 | 0.328 | 1.07  |
| CTDSP1       | -0.368 | 0.297 | -1.239 | 0.215 | 0.692 | 0.206 | -1.498 | 0.134 | 0.386 | 1.239 |
| CTDP1        | -0.346 | 0.303 | -1.14  | 0.254 | 0.708 | 0.215 | -1.362 | 0.173 | 0.39  | 1.282 |
| CTDNEP1      | -0.119 | 0.296 | -0.403 | 0.687 | 0.888 | 0.263 | -0.428 | 0.669 | 0.497 | 1.585 |
| CTCF         | -0.244 | 0.298 | -0.818 | 0.413 | 0.784 | 0.233 | -0.926 | 0.354 | 0.437 | 1.405 |
| CTC1         | -0.108 | 0.295 | -0.364 | 0.716 | 0.898 | 0.265 | -0.384 | 0.701 | 0.503 | 1.602 |
| CTC-338M12.4 | 0.239  | 0.296 | 0.808  | 0.419 | 1.27  | 0.376 | 0.718  | 0.473 | 0.711 | 2.27  |
| CTBS         | -0.105 | 0.296 | -0.354 | 0.723 | 0.9   | 0.267 | -0.373 | 0.709 | 0.504 | 1.61  |
| CTBP2        | 0.059  | 0.295 | 0.198  | 0.843 | 1.06  | 0.313 | 0.193  | 0.847 | 0.594 | 1.891 |
| CTBP1        | -0.403 | 0.299 | -1.349 | 0.177 | 0.668 | 0.2   | -1.661 | 0.097 | 0.372 | 1.2   |
| CTAGE11P     | 0.085  | 0.296 | 0.289  | 0.773 | 1.089 | 0.322 | 0.277  | 0.782 | 0.61  | 1.944 |
| CTAGE1       | -0.028 | 0.295 | -0.096 | 0.924 | 0.972 | 0.287 | -0.097 | 0.923 | 0.545 | 1.734 |
| CTAG2        | 0.392  | 0.298 | 1.317  | 0.188 | 1.48  | 0.441 | 1.089  | 0.276 | 0.826 | 2.655 |
| CT62         | -0.295 | 0.303 | -0.974 | 0.33  | 0.745 | 0.225 | -1.133 | 0.257 | 0.411 | 1.348 |
| CT55         | 0.131  | 0.296 | 0.441  | 0.659 | 1.139 | 0.338 | 0.413  | 0.68  | 0.638 | 2.036 |

|          |        |       |        |       |       |       |        |       |       |       |
|----------|--------|-------|--------|-------|-------|-------|--------|-------|-------|-------|
| CSTF3    | 0.423  | 0.303 | 1.395  | 0.163 | 1.527 | 0.463 | 1.137  | 0.255 | 0.842 | 2.767 |
| CSTF2T   | 0.217  | 0.296 | 0.735  | 0.463 | 1.243 | 0.368 | 0.66   | 0.509 | 0.696 | 2.219 |
| CSTF2    | -0.108 | 0.295 | -0.365 | 0.715 | 0.898 | 0.265 | -0.386 | 0.7   | 0.503 | 1.601 |
| CSTF1    | 0.584  | 0.306 | 1.909  | 0.056 | 1.793 | 0.548 | 1.446  | 0.148 | 0.984 | 3.264 |
| CSTB     | 0.236  | 0.296 | 0.798  | 0.425 | 1.267 | 0.375 | 0.711  | 0.477 | 0.709 | 2.264 |
| CSTA     | -0.511 | 0.301 | -1.695 | 0.09  | 0.6   | 0.181 | -2.212 | 0.027 | 0.333 | 1.083 |
| CST8     | 0.021  | 0.297 | 0.069  | 0.945 | 1.021 | 0.304 | 0.069  | 0.945 | 0.57  | 1.828 |
| CST7     | -0.419 | 0.298 | -1.404 | 0.16  | 0.658 | 0.196 | -1.743 | 0.081 | 0.367 | 1.181 |
| CST6     | -0.111 | 0.295 | -0.377 | 0.706 | 0.895 | 0.264 | -0.399 | 0.69  | 0.502 | 1.596 |
| CST5     | 0.151  | 0.296 | 0.511  | 0.609 | 1.164 | 0.345 | 0.474  | 0.635 | 0.651 | 2.08  |
| CST4     | -0.162 | 0.297 | -0.548 | 0.584 | 0.85  | 0.252 | -0.595 | 0.552 | 0.475 | 1.52  |
| CST3     | -0.516 | 0.306 | -1.686 | 0.092 | 0.597 | 0.183 | -2.207 | 0.027 | 0.328 | 1.087 |
| CST2     | -0.504 | 0.307 | -1.644 | 0.1   | 0.604 | 0.185 | -2.138 | 0.033 | 0.331 | 1.102 |
| CST1     | -0.227 | 0.298 | -0.763 | 0.445 | 0.797 | 0.237 | -0.857 | 0.391 | 0.444 | 1.429 |
| CSRP3    | -0.001 | 0.295 | -0.003 | 0.997 | 0.999 | 0.295 | -0.003 | 0.997 | 0.56  | 1.781 |
| CSRP2    | 0.238  | 0.298 | 0.799  | 0.424 | 1.268 | 0.377 | 0.711  | 0.477 | 0.708 | 2.272 |
| CSRP1    | 0.159  | 0.296 | 0.536  | 0.592 | 1.172 | 0.347 | 0.496  | 0.62  | 0.656 | 2.094 |
| CSRNP3   | 0.249  | 0.298 | 0.835  | 0.404 | 1.283 | 0.382 | 0.739  | 0.46  | 0.715 | 2.301 |
| CSRNP2   | -0.167 | 0.298 | -0.561 | 0.575 | 0.846 | 0.252 | -0.61  | 0.542 | 0.472 | 1.517 |
| CSPP1    | 0.318  | 0.298 | 1.068  | 0.286 | 1.374 | 0.409 | 0.915  | 0.36  | 0.767 | 2.463 |
| CSPG5    | 0.248  | 0.296 | 0.837  | 0.402 | 1.281 | 0.38  | 0.742  | 0.458 | 0.717 | 2.29  |
| CSPG4P1Y | 0.864  | 0.315 | 2.744  | 0.006 | 2.373 | 0.747 | 1.837  | 0.066 | 1.28  | 4.4   |
| CSPG4    | 0.032  | 0.295 | 0.11   | 0.913 | 1.033 | 0.305 | 0.108  | 0.914 | 0.579 | 1.841 |
| CSNK2B   | 0.27   | 0.298 | 0.906  | 0.365 | 1.309 | 0.39  | 0.794  | 0.427 | 0.731 | 2.346 |
| CSNK2A2  | 0.506  | 0.3   | 1.688  | 0.091 | 1.659 | 0.497 | 1.325  | 0.185 | 0.922 | 2.986 |
| CSNK2A1  | 0.218  | 0.296 | 0.735  | 0.462 | 1.243 | 0.368 | 0.661  | 0.509 | 0.696 | 2.221 |
| CSNK1G3  | -0.167 | 0.297 | -0.563 | 0.573 | 0.846 | 0.251 | -0.613 | 0.54  | 0.473 | 1.513 |
| CSNK1G2  | 0.312  | 0.298 | 1.048  | 0.295 | 1.367 | 0.407 | 0.9    | 0.368 | 0.762 | 2.452 |
| CSNK1G1  | 0.048  | 0.296 | 0.161  | 0.872 | 1.049 | 0.31  | 0.157  | 0.875 | 0.588 | 1.872 |
| CSNK1E   | 0.64   | 0.306 | 2.095  | 0.036 | 1.897 | 0.58  | 1.547  | 0.122 | 1.042 | 3.453 |
| CSNK1D   | -0.107 | 0.295 | -0.361 | 0.718 | 0.899 | 0.265 | -0.381 | 0.703 | 0.504 | 1.603 |
| CSNK1A1  | -0.052 | 0.295 | -0.176 | 0.86  | 0.949 | 0.28  | -0.18  | 0.857 | 0.532 | 1.694 |
| CSN3     | 0.147  | 0.296 | 0.498  | 0.619 | 1.159 | 0.343 | 0.463  | 0.643 | 0.649 | 2.068 |
| CSN2     | 0.12   | 0.297 | 0.404  | 0.686 | 1.127 | 0.335 | 0.381  | 0.704 | 0.63  | 2.017 |
| CSN1S1   | -0.212 | 0.296 | -0.716 | 0.474 | 0.809 | 0.24  | -0.798 | 0.425 | 0.452 | 1.446 |
| CSK      | 0.25   | 0.299 | 0.836  | 0.403 | 1.284 | 0.383 | 0.74   | 0.459 | 0.715 | 2.305 |
| CSHL1    | -0.746 | 0.315 | -2.368 | 0.018 | 0.474 | 0.149 | -3.518 | 0     | 0.256 | 0.879 |
| CSH1     | -0.686 | 0.31  | -2.215 | 0.027 | 0.503 | 0.156 | -3.183 | 0.001 | 0.274 | 0.924 |

|            |        |       |        |       |       |       |        |       |       |       |
|------------|--------|-------|--------|-------|-------|-------|--------|-------|-------|-------|
| CSGALNACT2 | -0.009 | 0.295 | -0.031 | 0.975 | 0.991 | 0.292 | -0.031 | 0.975 | 0.556 | 1.766 |
| CSGALNACT1 | -0.229 | 0.296 | -0.775 | 0.438 | 0.795 | 0.235 | -0.871 | 0.384 | 0.445 | 1.42  |
| CSF3R      | -0.326 | 0.298 | -1.094 | 0.274 | 0.722 | 0.215 | -1.294 | 0.196 | 0.403 | 1.294 |
| CSF3       | -0.204 | 0.296 | -0.691 | 0.49  | 0.815 | 0.241 | -0.766 | 0.444 | 0.457 | 1.455 |
| CSF2RB     | -0.402 | 0.299 | -1.347 | 0.178 | 0.669 | 0.2   | -1.658 | 0.097 | 0.373 | 1.201 |
| CSF2RA     | -0.896 | 0.316 | -2.836 | 0.005 | 0.408 | 0.129 | -4.589 | 0     | 0.22  | 0.758 |
| CSF2       | 0.177  | 0.296 | 0.6    | 0.549 | 1.194 | 0.353 | 0.549  | 0.583 | 0.669 | 2.131 |
| CSF1R      | -0.737 | 0.31  | -2.376 | 0.018 | 0.478 | 0.148 | -3.513 | 0     | 0.26  | 0.879 |
| CSF1       | -0.352 | 0.304 | -1.158 | 0.247 | 0.703 | 0.214 | -1.388 | 0.165 | 0.388 | 1.276 |
| CSE1L      | 0.093  | 0.296 | 0.312  | 0.755 | 1.097 | 0.325 | 0.298  | 0.765 | 0.614 | 1.96  |
| CSDE1      | -0.748 | 0.31  | -2.415 | 0.016 | 0.473 | 0.147 | -3.594 | 0     | 0.258 | 0.868 |
| CSDC2      | -0.687 | 0.306 | -2.247 | 0.025 | 0.503 | 0.154 | -3.231 | 0.001 | 0.276 | 0.916 |
| CSAD       | -0.166 | 0.296 | -0.56  | 0.575 | 0.847 | 0.25  | -0.609 | 0.542 | 0.475 | 1.512 |
| CS         | -0.026 | 0.295 | -0.088 | 0.93  | 0.974 | 0.288 | -0.089 | 0.929 | 0.546 | 1.738 |
| CRYZL1     | 0.13   | 0.298 | 0.438  | 0.661 | 1.139 | 0.339 | 0.411  | 0.681 | 0.636 | 2.041 |
| CRYZ       | -0.269 | 0.3   | -0.895 | 0.371 | 0.764 | 0.229 | -1.027 | 0.305 | 0.425 | 1.376 |
| CRYM       | 0.227  | 0.298 | 0.764  | 0.445 | 1.255 | 0.374 | 0.683  | 0.495 | 0.7   | 2.249 |
| CRYL1      | 0.525  | 0.302 | 1.736  | 0.083 | 1.69  | 0.511 | 1.35   | 0.177 | 0.934 | 3.057 |
| CRYGD      | -0.266 | 0.298 | -0.895 | 0.371 | 0.766 | 0.228 | -1.026 | 0.305 | 0.427 | 1.373 |
| CRYGC      | -0.384 | 0.3   | -1.283 | 0.2   | 0.681 | 0.204 | -1.564 | 0.118 | 0.378 | 1.225 |
| CRYGB      | -0.019 | 0.295 | -0.063 | 0.95  | 0.982 | 0.29  | -0.064 | 0.949 | 0.551 | 1.75  |
| CRYGA      | -0.139 | 0.296 | -0.468 | 0.64  | 0.871 | 0.258 | -0.502 | 0.616 | 0.487 | 1.556 |
| CRYBG3     | -0.103 | 0.295 | -0.348 | 0.728 | 0.902 | 0.266 | -0.366 | 0.714 | 0.506 | 1.61  |
| CRYBG2     | 0.014  | 0.296 | 0.047  | 0.963 | 1.014 | 0.3   | 0.046  | 0.963 | 0.568 | 1.811 |
| CRYBG1     | -0.066 | 0.295 | -0.223 | 0.824 | 0.936 | 0.276 | -0.23  | 0.818 | 0.525 | 1.67  |
| CRYBB3     | -0.02  | 0.296 | -0.068 | 0.946 | 0.98  | 0.29  | -0.069 | 0.945 | 0.549 | 1.751 |
| CRYBB2P1   | 0.077  | 0.296 | 0.259  | 0.796 | 1.08  | 0.319 | 0.249  | 0.803 | 0.605 | 1.927 |
| CRYBB2     | -0.19  | 0.296 | -0.642 | 0.521 | 0.827 | 0.245 | -0.707 | 0.479 | 0.463 | 1.477 |
| CRYBB1     | 0.108  | 0.295 | 0.364  | 0.716 | 1.114 | 0.329 | 0.345  | 0.73  | 0.624 | 1.986 |
| CRYBA4     | 0.083  | 0.297 | 0.281  | 0.779 | 1.087 | 0.323 | 0.269  | 0.788 | 0.607 | 1.945 |
| CRYBA2     | -0.073 | 0.295 | -0.247 | 0.805 | 0.93  | 0.275 | -0.256 | 0.798 | 0.521 | 1.659 |
| CRYBA1     | 0.944  | 0.321 | 2.946  | 0.003 | 2.571 | 0.824 | 1.906  | 0.057 | 1.372 | 4.819 |
| CRYAB      | -0.422 | 0.299 | -1.413 | 0.158 | 0.656 | 0.196 | -1.757 | 0.079 | 0.365 | 1.177 |
| CRYAA      | -0.336 | 0.298 | -1.127 | 0.26  | 0.715 | 0.213 | -1.339 | 0.181 | 0.399 | 1.282 |
| CRY2       | -0.129 | 0.295 | -0.438 | 0.661 | 0.879 | 0.26  | -0.468 | 0.64  | 0.492 | 1.567 |
| CRY1       | -0.13  | 0.295 | -0.44  | 0.66  | 0.878 | 0.259 | -0.47  | 0.639 | 0.492 | 1.567 |
| CRX        | -0.203 | 0.298 | -0.68  | 0.496 | 0.817 | 0.243 | -0.754 | 0.451 | 0.455 | 1.464 |
| CRTC3      | -0.706 | 0.306 | -2.307 | 0.021 | 0.493 | 0.151 | -3.353 | 0.001 | 0.271 | 0.899 |



|          |        |       |        |       |       |       |        |       |       |       |
|----------|--------|-------|--------|-------|-------|-------|--------|-------|-------|-------|
| CRTC1    | 0.327  | 0.298 | 1.099  | 0.272 | 1.387 | 0.413 | 0.937  | 0.349 | 0.774 | 2.487 |
| CRTAP    | -0.233 | 0.298 | -0.781 | 0.435 | 0.793 | 0.236 | -0.879 | 0.379 | 0.442 | 1.421 |
| CRTAM    | -0.189 | 0.296 | -0.64  | 0.522 | 0.827 | 0.245 | -0.705 | 0.481 | 0.464 | 1.477 |
| CRTAC1   | 0.068  | 0.296 | 0.231  | 0.817 | 1.071 | 0.317 | 0.223  | 0.823 | 0.6   | 1.911 |
| CRP      | -0.013 | 0.296 | -0.044 | 0.965 | 0.987 | 0.292 | -0.044 | 0.965 | 0.553 | 1.762 |
| CROT     | 0.052  | 0.296 | 0.177  | 0.86  | 1.054 | 0.312 | 0.172  | 0.863 | 0.589 | 1.884 |
| CROCCP3  | 0.15   | 0.296 | 0.505  | 0.613 | 1.162 | 0.344 | 0.469  | 0.639 | 0.65  | 2.076 |
| CROCCP2  | -0.151 | 0.296 | -0.509 | 0.611 | 0.86  | 0.255 | -0.55  | 0.582 | 0.481 | 1.537 |
| CROCC    | -0.52  | 0.302 | -1.722 | 0.085 | 0.594 | 0.18  | -2.258 | 0.024 | 0.329 | 1.075 |
| CRNN     | 0.347  | 0.298 | 1.163  | 0.245 | 1.414 | 0.421 | 0.983  | 0.326 | 0.789 | 2.536 |
| CRNKL1   | -0.674 | 0.306 | -2.199 | 0.028 | 0.51  | 0.156 | -3.139 | 0.002 | 0.28  | 0.929 |
| CRMP1    | 0.058  | 0.298 | 0.195  | 0.845 | 1.06  | 0.316 | 0.19   | 0.85  | 0.591 | 1.9   |
| CRLF3    | -0.24  | 0.297 | -0.808 | 0.419 | 0.787 | 0.233 | -0.914 | 0.361 | 0.44  | 1.407 |
| CRLF2    | -0.035 | 0.3   | -0.116 | 0.907 | 0.966 | 0.29  | -0.119 | 0.906 | 0.537 | 1.738 |
| CRLF1    | 0.33   | 0.298 | 1.109  | 0.268 | 1.391 | 0.415 | 0.944  | 0.345 | 0.776 | 2.495 |
| CRKL     | -0.123 | 0.296 | -0.415 | 0.678 | 0.884 | 0.262 | -0.441 | 0.659 | 0.495 | 1.581 |
| CRK      | -0.782 | 0.315 | -2.485 | 0.013 | 0.458 | 0.144 | -3.768 | 0     | 0.247 | 0.848 |
| CRISPLD2 | -0.683 | 0.306 | -2.234 | 0.025 | 0.505 | 0.154 | -3.205 | 0.001 | 0.277 | 0.92  |
| CRISP3   | -0.41  | 0.3   | -1.366 | 0.172 | 0.664 | 0.199 | -1.688 | 0.091 | 0.369 | 1.195 |
| CRISP2   | 0.051  | 0.295 | 0.173  | 0.862 | 1.053 | 0.311 | 0.169  | 0.866 | 0.59  | 1.878 |
| CRISP1   | 0.13   | 0.297 | 0.438  | 0.661 | 1.139 | 0.338 | 0.411  | 0.681 | 0.637 | 2.037 |
| CRIPT    | 0.089  | 0.296 | 0.302  | 0.762 | 1.094 | 0.324 | 0.289  | 0.772 | 0.612 | 1.953 |
| CRIP2    | 0.051  | 0.296 | 0.172  | 0.864 | 1.052 | 0.311 | 0.168  | 0.867 | 0.589 | 1.878 |
| CRIP1    | 0.051  | 0.295 | 0.171  | 0.864 | 1.052 | 0.311 | 0.167  | 0.867 | 0.589 | 1.877 |
| CRIM1    | -0.656 | 0.31  | -2.116 | 0.034 | 0.519 | 0.161 | -2.99  | 0.003 | 0.283 | 0.953 |
| CRHR2    | -0.656 | 0.306 | -2.145 | 0.032 | 0.519 | 0.159 | -3.031 | 0.002 | 0.285 | 0.945 |
| CRHR1    | 0.432  | 0.303 | 1.427  | 0.154 | 1.54  | 0.466 | 1.159  | 0.247 | 0.851 | 2.787 |
| CRHBP    | 0.192  | 0.299 | 0.642  | 0.521 | 1.211 | 0.362 | 0.585  | 0.559 | 0.675 | 2.175 |
| CRH      | -0.371 | 0.3   | -1.239 | 0.215 | 0.69  | 0.207 | -1.5   | 0.134 | 0.383 | 1.241 |
| CREM     | -0.54  | 0.304 | -1.778 | 0.075 | 0.583 | 0.177 | -2.357 | 0.018 | 0.321 | 1.057 |
| CRELD2   | -0.207 | 0.298 | -0.695 | 0.487 | 0.813 | 0.242 | -0.772 | 0.44  | 0.453 | 1.458 |
| CRELD1   | -0.641 | 0.31  | -2.068 | 0.039 | 0.527 | 0.163 | -2.897 | 0.004 | 0.287 | 0.967 |
| CREG1    | -0.135 | 0.297 | -0.456 | 0.648 | 0.873 | 0.259 | -0.488 | 0.625 | 0.488 | 1.562 |
| CREBZF   | 0.303  | 0.298 | 1.019  | 0.308 | 1.355 | 0.403 | 0.879  | 0.379 | 0.756 | 2.428 |
| CREBL2   | -0.575 | 0.306 | -1.88  | 0.06  | 0.563 | 0.172 | -2.541 | 0.011 | 0.309 | 1.025 |
| CREBBP   | 0.255  | 0.298 | 0.858  | 0.391 | 1.291 | 0.384 | 0.757  | 0.449 | 0.72  | 2.313 |
| CREB3L2  | -0.552 | 0.301 | -1.835 | 0.066 | 0.576 | 0.173 | -2.45  | 0.014 | 0.319 | 1.038 |
| CREB3L1  | -0.497 | 0.3   | -1.657 | 0.098 | 0.608 | 0.182 | -2.146 | 0.032 | 0.338 | 1.095 |

|          |        |       |        |       |       |       |        |       |       |       |
|----------|--------|-------|--------|-------|-------|-------|--------|-------|-------|-------|
| CREB3    | 0.022  | 0.295 | 0.075  | 0.94  | 1.022 | 0.302 | 0.074  | 0.941 | 0.573 | 1.823 |
| CREB1    | 0.147  | 0.296 | 0.498  | 0.619 | 1.159 | 0.343 | 0.463  | 0.644 | 0.649 | 2.069 |
| CRCT1    | -0.021 | 0.295 | -0.071 | 0.944 | 0.979 | 0.289 | -0.071 | 0.943 | 0.549 | 1.746 |
| CRCP     | 0.569  | 0.306 | 1.861  | 0.063 | 1.766 | 0.54  | 1.419  | 0.156 | 0.97  | 3.216 |
| CRBN     | -0.551 | 0.306 | -1.801 | 0.072 | 0.577 | 0.176 | -2.402 | 0.016 | 0.317 | 1.05  |
| CRB1     | -0.411 | 0.3   | -1.373 | 0.17  | 0.663 | 0.199 | -1.699 | 0.089 | 0.368 | 1.192 |
| CRAT     | 0.218  | 0.298 | 0.731  | 0.465 | 1.243 | 0.37  | 0.657  | 0.511 | 0.694 | 2.228 |
| CRADD    | -0.324 | 0.303 | -1.066 | 0.286 | 0.724 | 0.22  | -1.259 | 0.208 | 0.399 | 1.312 |
| CRACDL   | -0.05  | 0.296 | -0.17  | 0.865 | 0.951 | 0.281 | -0.174 | 0.862 | 0.533 | 1.698 |
| CRABP2   | 0.039  | 0.296 | 0.131  | 0.895 | 1.04  | 0.308 | 0.129  | 0.897 | 0.582 | 1.857 |
| CRABP1   | 0.103  | 0.295 | 0.35   | 0.726 | 1.109 | 0.327 | 0.333  | 0.739 | 0.622 | 1.978 |
| CR2      | -0.395 | 0.299 | -1.322 | 0.186 | 0.674 | 0.201 | -1.621 | 0.105 | 0.375 | 1.21  |
| CR1      | 0.442  | 0.303 | 1.46   | 0.144 | 1.555 | 0.471 | 1.18   | 0.238 | 0.859 | 2.815 |
| CPVL     | -0.243 | 0.297 | -0.818 | 0.413 | 0.784 | 0.233 | -0.926 | 0.354 | 0.439 | 1.403 |
| CPTP     | 0.542  | 0.302 | 1.794  | 0.073 | 1.719 | 0.52  | 1.385  | 0.166 | 0.951 | 3.109 |
| CPT2     | -0.47  | 0.306 | -1.535 | 0.125 | 0.625 | 0.191 | -1.961 | 0.05  | 0.343 | 1.139 |
| CPT1A    | 0.162  | 0.295 | 0.549  | 0.583 | 1.176 | 0.347 | 0.507  | 0.612 | 0.659 | 2.098 |
| CPSF7    | 0.65   | 0.317 | 2.053  | 0.04  | 1.915 | 0.606 | 1.51   | 0.131 | 1.03  | 3.562 |
| CPSF6    | 0.767  | 0.315 | 2.434  | 0.015 | 2.152 | 0.678 | 1.7    | 0.089 | 1.161 | 3.991 |
| CPSF4    | 0.273  | 0.299 | 0.913  | 0.361 | 1.314 | 0.392 | 0.799  | 0.424 | 0.731 | 2.359 |
| CPSF1    | -0.574 | 0.31  | -1.852 | 0.064 | 0.563 | 0.175 | -2.503 | 0.012 | 0.307 | 1.034 |
| CPS1-IT1 | 0.732  | 0.31  | 2.362  | 0.018 | 2.079 | 0.644 | 1.675  | 0.094 | 1.133 | 3.815 |
| CPS1     | 0.121  | 0.295 | 0.41   | 0.682 | 1.129 | 0.333 | 0.386  | 0.699 | 0.633 | 2.014 |
| CPQ      | -0.696 | 0.31  | -2.246 | 0.025 | 0.499 | 0.154 | -3.246 | 0.001 | 0.272 | 0.915 |
| CPPED1   | 0.423  | 0.298 | 1.419  | 0.156 | 1.527 | 0.456 | 1.157  | 0.247 | 0.851 | 2.741 |
| CPOX     | -0.295 | 0.298 | -0.993 | 0.321 | 0.744 | 0.221 | -1.155 | 0.248 | 0.415 | 1.333 |
| CPNE7    | 0.681  | 0.306 | 2.225  | 0.026 | 1.977 | 0.605 | 1.613  | 0.107 | 1.085 | 3.603 |
| CPNE6    | 0.064  | 0.296 | 0.216  | 0.829 | 1.066 | 0.316 | 0.209  | 0.835 | 0.597 | 1.904 |
| CPNE3    | -0.472 | 0.303 | -1.56  | 0.119 | 0.624 | 0.189 | -1.994 | 0.046 | 0.345 | 1.129 |
| CPNE1    | -0.455 | 0.302 | -1.504 | 0.133 | 0.635 | 0.192 | -1.904 | 0.057 | 0.351 | 1.148 |
| CPN2     | 0.209  | 0.296 | 0.707  | 0.48  | 1.233 | 0.365 | 0.638  | 0.524 | 0.69  | 2.204 |
| CPN1     | 0.415  | 0.3   | 1.382  | 0.167 | 1.514 | 0.454 | 1.132  | 0.258 | 0.841 | 2.725 |
| CPM      | -0.261 | 0.298 | -0.878 | 0.38  | 0.77  | 0.229 | -1.004 | 0.316 | 0.43  | 1.38  |
| CPLX3    | 0.62   | 0.306 | 2.027  | 0.043 | 1.858 | 0.568 | 1.51   | 0.131 | 1.021 | 3.384 |
| CPLX2    | 0.152  | 0.295 | 0.513  | 0.608 | 1.164 | 0.344 | 0.476  | 0.634 | 0.652 | 2.076 |
| CPLANE2  | 0.245  | 0.298 | 0.823  | 0.41  | 1.278 | 0.381 | 0.73   | 0.465 | 0.713 | 2.293 |
| CPLANE1  | 0.055  | 0.295 | 0.185  | 0.853 | 1.056 | 0.312 | 0.18   | 0.857 | 0.592 | 1.884 |
| CPED1    | -0.386 | 0.3   | -1.289 | 0.198 | 0.68  | 0.204 | -1.573 | 0.116 | 0.378 | 1.223 |

|         |        |       |        |       |       |       |        |       |       |       |
|---------|--------|-------|--------|-------|-------|-------|--------|-------|-------|-------|
| CPEB3   | -0.569 | 0.306 | -1.858 | 0.063 | 0.566 | 0.173 | -2.503 | 0.012 | 0.311 | 1.032 |
| CPEB1   | 0.552  | 0.303 | 1.823  | 0.068 | 1.736 | 0.526 | 1.401  | 0.161 | 0.959 | 3.142 |
| CPE     | -0.47  | 0.3   | -1.568 | 0.117 | 0.625 | 0.187 | -2.002 | 0.045 | 0.347 | 1.125 |
| CPD     | -0.182 | 0.297 | -0.613 | 0.54  | 0.834 | 0.247 | -0.672 | 0.502 | 0.466 | 1.492 |
| CPB2    | -0.165 | 0.296 | -0.555 | 0.579 | 0.848 | 0.251 | -0.604 | 0.546 | 0.475 | 1.516 |
| CPB1    | 0.066  | 0.295 | 0.223  | 0.824 | 1.068 | 0.315 | 0.216  | 0.829 | 0.599 | 1.904 |
| CPA4    | -0.182 | 0.297 | -0.612 | 0.54  | 0.834 | 0.247 | -0.672 | 0.502 | 0.466 | 1.491 |
| CPA3    | -0.492 | 0.307 | -1.604 | 0.109 | 0.612 | 0.187 | -2.071 | 0.038 | 0.335 | 1.115 |
| CPA2    | 0.071  | 0.297 | 0.24   | 0.81  | 1.074 | 0.319 | 0.232  | 0.817 | 0.6   | 1.922 |
| CPA1    | 0.234  | 0.297 | 0.789  | 0.43  | 1.264 | 0.375 | 0.703  | 0.482 | 0.706 | 2.26  |
| CP      | 0.172  | 0.295 | 0.584  | 0.559 | 1.188 | 0.351 | 0.536  | 0.592 | 0.666 | 2.12  |
| COX8A   | 0.012  | 0.295 | 0.04   | 0.968 | 1.012 | 0.299 | 0.04   | 0.968 | 0.567 | 1.805 |
| COX7C   | 0.25   | 0.298 | 0.836  | 0.403 | 1.283 | 0.383 | 0.74   | 0.459 | 0.715 | 2.303 |
| COX7B   | 0.504  | 0.303 | 1.664  | 0.096 | 1.655 | 0.501 | 1.308  | 0.191 | 0.914 | 2.994 |
| COX7A2L | 0.11   | 0.295 | 0.371  | 0.711 | 1.116 | 0.33  | 0.351  | 0.725 | 0.625 | 1.991 |
| COX7A2  | 0.57   | 0.303 | 1.884  | 0.06  | 1.768 | 0.535 | 1.436  | 0.151 | 0.977 | 3.2   |
| COX7A1  | -0.287 | 0.298 | -0.964 | 0.335 | 0.751 | 0.223 | -1.117 | 0.264 | 0.419 | 1.345 |
| COX6C   | -0.016 | 0.296 | -0.054 | 0.957 | 0.984 | 0.291 | -0.054 | 0.957 | 0.552 | 1.756 |
| COX6B1  | 0.739  | 0.306 | 2.414  | 0.016 | 2.094 | 0.641 | 1.706  | 0.088 | 1.149 | 3.817 |
| COX6A2  | 0.152  | 0.295 | 0.514  | 0.607 | 1.164 | 0.344 | 0.477  | 0.634 | 0.652 | 2.077 |
| COX6A1  | 0.409  | 0.298 | 1.373  | 0.17  | 1.506 | 0.449 | 1.127  | 0.26  | 0.84  | 2.7   |
| COX5B   | 0.547  | 0.306 | 1.791  | 0.073 | 1.729 | 0.528 | 1.38   | 0.168 | 0.95  | 3.146 |
| COX5A   | 0.728  | 0.31  | 2.35   | 0.019 | 2.07  | 0.641 | 1.67   | 0.095 | 1.128 | 3.799 |
| COX4I1  | 0.669  | 0.306 | 2.185  | 0.029 | 1.952 | 0.597 | 1.593  | 0.111 | 1.071 | 3.556 |
| COX15   | -0.244 | 0.297 | -0.823 | 0.41  | 0.783 | 0.233 | -0.933 | 0.351 | 0.438 | 1.401 |
| COX11   | 0.133  | 0.296 | 0.449  | 0.653 | 1.142 | 0.338 | 0.421  | 0.674 | 0.64  | 2.038 |
| COX10   | 0.161  | 0.295 | 0.545  | 0.586 | 1.175 | 0.347 | 0.503  | 0.615 | 0.658 | 2.096 |
| CORT    | 0.475  | 0.3   | 1.584  | 0.113 | 1.609 | 0.483 | 1.261  | 0.207 | 0.893 | 2.897 |
| CORO7   | 0.44   | 0.298 | 1.477  | 0.14  | 1.553 | 0.463 | 1.195  | 0.232 | 0.866 | 2.786 |
| CORO2B  | -0.437 | 0.298 | -1.465 | 0.143 | 0.646 | 0.193 | -1.837 | 0.066 | 0.36  | 1.159 |
| CORO2A  | -0.297 | 0.3   | -0.99  | 0.322 | 0.743 | 0.223 | -1.153 | 0.249 | 0.413 | 1.338 |
| CORO1C  | 0.397  | 0.298 | 1.331  | 0.183 | 1.487 | 0.443 | 1.099  | 0.272 | 0.829 | 2.667 |
| CORO1B  | -0.51  | 0.302 | -1.689 | 0.091 | 0.6   | 0.181 | -2.203 | 0.028 | 0.332 | 1.085 |
| CORO1A  | -0.588 | 0.303 | -1.939 | 0.052 | 0.556 | 0.168 | -2.639 | 0.008 | 0.307 | 1.006 |
| CORIN   | -0.526 | 0.306 | -1.722 | 0.085 | 0.591 | 0.181 | -2.266 | 0.023 | 0.325 | 1.075 |
| COQ9    | 0.348  | 0.298 | 1.169  | 0.242 | 1.416 | 0.421 | 0.987  | 0.323 | 0.79  | 2.537 |
| COQ8B   | 0.194  | 0.296 | 0.658  | 0.511 | 1.215 | 0.359 | 0.598  | 0.55  | 0.68  | 2.169 |
| COQ8A   | 0.164  | 0.295 | 0.555  | 0.579 | 1.178 | 0.348 | 0.512  | 0.609 | 0.66  | 2.102 |

|          |        |       |        |       |       |       |        |       |       |       |
|----------|--------|-------|--------|-------|-------|-------|--------|-------|-------|-------|
| COQ7     | 0.56   | 0.303 | 1.851  | 0.064 | 1.751 | 0.53  | 1.417  | 0.156 | 0.968 | 3.169 |
| COQ6     | -0.202 | 0.298 | -0.679 | 0.497 | 0.817 | 0.243 | -0.752 | 0.452 | 0.456 | 1.464 |
| COQ4     | -0.14  | 0.3   | -0.465 | 0.642 | 0.87  | 0.261 | -0.499 | 0.618 | 0.483 | 1.566 |
| COQ3     | 0.637  | 0.306 | 2.084  | 0.037 | 1.891 | 0.578 | 1.541  | 0.123 | 1.039 | 3.442 |
| COQ2     | 0.046  | 0.295 | 0.157  | 0.875 | 1.048 | 0.31  | 0.154  | 0.878 | 0.587 | 1.869 |
| COQ10B   | 0.41   | 0.298 | 1.376  | 0.169 | 1.506 | 0.448 | 1.129  | 0.259 | 0.84  | 2.7   |
| COPZ2    | -0.484 | 0.302 | -1.603 | 0.109 | 0.616 | 0.186 | -2.062 | 0.039 | 0.341 | 1.114 |
| COPZ1    | -0.457 | 0.302 | -1.513 | 0.13  | 0.633 | 0.191 | -1.918 | 0.055 | 0.35  | 1.145 |
| COPS8    | 0.306  | 0.298 | 1.028  | 0.304 | 1.358 | 0.404 | 0.886  | 0.376 | 0.758 | 2.433 |
| COPS7B   | -0.523 | 0.303 | -1.728 | 0.084 | 0.593 | 0.179 | -2.269 | 0.023 | 0.328 | 1.073 |
| COPS7A   | -0.324 | 0.298 | -1.089 | 0.276 | 0.723 | 0.215 | -1.286 | 0.198 | 0.404 | 1.296 |
| COPS6    | -0.001 | 0.297 | -0.004 | 0.997 | 0.999 | 0.297 | -0.004 | 0.997 | 0.558 | 1.788 |
| COPS5    | 0.15   | 0.295 | 0.508  | 0.612 | 1.162 | 0.343 | 0.472  | 0.637 | 0.651 | 2.073 |
| COPS4    | 0.424  | 0.298 | 1.423  | 0.155 | 1.528 | 0.456 | 1.16   | 0.246 | 0.852 | 2.741 |
| COPS3    | 0.536  | 0.302 | 1.775  | 0.076 | 1.71  | 0.517 | 1.374  | 0.17  | 0.946 | 3.092 |
| COPS2    | -0.126 | 0.298 | -0.422 | 0.673 | 0.882 | 0.263 | -0.45  | 0.653 | 0.492 | 1.582 |
| COPG1    | 0.134  | 0.298 | 0.45   | 0.653 | 1.143 | 0.341 | 0.421  | 0.674 | 0.638 | 2.05  |
| COPE     | -0.208 | 0.296 | -0.702 | 0.483 | 0.812 | 0.241 | -0.78  | 0.435 | 0.455 | 1.451 |
| COPB2    | 0.04   | 0.295 | 0.135  | 0.893 | 1.041 | 0.307 | 0.132  | 0.895 | 0.583 | 1.857 |
| COPB1    | 0.51   | 0.302 | 1.685  | 0.092 | 1.665 | 0.503 | 1.321  | 0.187 | 0.92  | 3.011 |
| COPA     | -0.286 | 0.298 | -0.962 | 0.336 | 0.751 | 0.224 | -1.114 | 0.265 | 0.419 | 1.346 |
| COMT     | -0.1   | 0.296 | -0.337 | 0.736 | 0.905 | 0.268 | -0.354 | 0.723 | 0.507 | 1.616 |
| COMP     | -0.585 | 0.303 | -1.933 | 0.053 | 0.557 | 0.169 | -2.627 | 0.009 | 0.308 | 1.008 |
| COMMD9   | -0.461 | 0.306 | -1.507 | 0.132 | 0.631 | 0.193 | -1.915 | 0.055 | 0.346 | 1.148 |
| COMMD8   | 0.171  | 0.3   | 0.57   | 0.569 | 1.186 | 0.356 | 0.524  | 0.6   | 0.659 | 2.135 |
| COMMD4   | 0.003  | 0.295 | 0.01   | 0.992 | 1.003 | 0.296 | 0.01   | 0.992 | 0.562 | 1.79  |
| COMMD3   | -0.241 | 0.301 | -0.8   | 0.424 | 0.786 | 0.237 | -0.904 | 0.366 | 0.435 | 1.419 |
| COMMD10  | -0.312 | 0.298 | -1.05  | 0.294 | 0.732 | 0.218 | -1.232 | 0.218 | 0.408 | 1.311 |
| COLQ     | -0.383 | 0.298 | -1.285 | 0.199 | 0.682 | 0.203 | -1.566 | 0.117 | 0.38  | 1.223 |
| COLGALT2 | -0.077 | 0.302 | -0.254 | 0.8   | 0.926 | 0.279 | -0.264 | 0.792 | 0.513 | 1.673 |
| COLGALT1 | 0.904  | 0.321 | 2.819  | 0.005 | 2.469 | 0.792 | 1.856  | 0.064 | 1.317 | 4.628 |
| COLEC12  | -0.674 | 0.31  | -2.176 | 0.03  | 0.51  | 0.158 | -3.107 | 0.002 | 0.278 | 0.935 |
| COLEC11  | 0.079  | 0.297 | 0.265  | 0.791 | 1.082 | 0.321 | 0.255  | 0.799 | 0.605 | 1.935 |
| COLEC10  | -0.368 | 0.299 | -1.229 | 0.219 | 0.692 | 0.207 | -1.486 | 0.137 | 0.385 | 1.245 |
| COL9A3   | 0.024  | 0.296 | 0.082  | 0.934 | 1.025 | 0.304 | 0.081  | 0.935 | 0.573 | 1.831 |
| COL9A2   | 0.52   | 0.302 | 1.719  | 0.086 | 1.682 | 0.508 | 1.341  | 0.18  | 0.93  | 3.042 |
| COL9A1   | -0.237 | 0.296 | -0.799 | 0.424 | 0.789 | 0.234 | -0.901 | 0.367 | 0.441 | 1.411 |
| COL8A2   | -0.574 | 0.302 | -1.898 | 0.058 | 0.563 | 0.17  | -2.563 | 0.01  | 0.312 | 1.019 |

|         |        |       |        |       |       |       |        |       |       |       |
|---------|--------|-------|--------|-------|-------|-------|--------|-------|-------|-------|
| COL8A1  | -0.486 | 0.302 | -1.608 | 0.108 | 0.615 | 0.186 | -2.07  | 0.038 | 0.34  | 1.112 |
| COL7A1  | -0.061 | 0.295 | -0.206 | 0.836 | 0.941 | 0.278 | -0.213 | 0.831 | 0.528 | 1.678 |
| COL6A3  | -0.084 | 0.295 | -0.284 | 0.776 | 0.92  | 0.271 | -0.296 | 0.767 | 0.516 | 1.64  |
| COL6A2  | -0.807 | 0.31  | -2.601 | 0.009 | 0.446 | 0.138 | -4     | 0     | 0.243 | 0.82  |
| COL6A1  | -0.422 | 0.298 | -1.417 | 0.157 | 0.656 | 0.195 | -1.762 | 0.078 | 0.366 | 1.176 |
| COL5A3  | -0.004 | 0.295 | -0.015 | 0.988 | 0.996 | 0.294 | -0.015 | 0.988 | 0.558 | 1.776 |
| COL5A2  | -0.494 | 0.3   | -1.647 | 0.1   | 0.61  | 0.183 | -2.129 | 0.033 | 0.339 | 1.098 |
| COL5A1  | -0.543 | 0.302 | -1.797 | 0.072 | 0.581 | 0.176 | -2.386 | 0.017 | 0.321 | 1.051 |
| COL4A6  | -0.107 | 0.297 | -0.359 | 0.72  | 0.899 | 0.267 | -0.379 | 0.705 | 0.502 | 1.608 |
| COL4A5  | -0.311 | 0.3   | -1.037 | 0.3   | 0.732 | 0.22  | -1.216 | 0.224 | 0.406 | 1.32  |
| COL4A4  | -0.067 | 0.296 | -0.226 | 0.821 | 0.935 | 0.276 | -0.234 | 0.815 | 0.524 | 1.669 |
| COL4A3  | 0.228  | 0.302 | 0.753  | 0.452 | 1.255 | 0.379 | 0.673  | 0.501 | 0.694 | 2.27  |
| COL4A2  | -0.217 | 0.297 | -0.731 | 0.465 | 0.805 | 0.239 | -0.817 | 0.414 | 0.449 | 1.441 |
| COL4A1  | -0.354 | 0.298 | -1.19  | 0.234 | 0.702 | 0.209 | -1.428 | 0.153 | 0.391 | 1.258 |
| COL3A1  | -0.385 | 0.298 | -1.293 | 0.196 | 0.681 | 0.203 | -1.576 | 0.115 | 0.38  | 1.22  |
| COL2A1  | -0.107 | 0.296 | -0.362 | 0.717 | 0.898 | 0.266 | -0.382 | 0.702 | 0.503 | 1.604 |
| COL21A1 | -0.277 | 0.296 | -0.937 | 0.349 | 0.758 | 0.224 | -1.079 | 0.28  | 0.424 | 1.354 |
| COL1A2  | -0.352 | 0.298 | -1.184 | 0.236 | 0.703 | 0.209 | -1.419 | 0.156 | 0.392 | 1.26  |
| COL1A1  | -0.474 | 0.302 | -1.568 | 0.117 | 0.623 | 0.188 | -2.006 | 0.045 | 0.344 | 1.126 |
| COL19A1 | -0.21  | 0.296 | -0.709 | 0.478 | 0.81  | 0.24  | -0.789 | 0.43  | 0.453 | 1.449 |
| COL18A1 | -0.152 | 0.295 | -0.513 | 0.608 | 0.859 | 0.254 | -0.554 | 0.579 | 0.482 | 1.533 |
| COL17A1 | -0.576 | 0.302 | -1.905 | 0.057 | 0.562 | 0.17  | -2.575 | 0.01  | 0.311 | 1.017 |
| COL16A1 | -0.596 | 0.306 | -1.949 | 0.051 | 0.551 | 0.168 | -2.666 | 0.008 | 0.302 | 1.003 |
| COL15A1 | -0.644 | 0.304 | -2.12  | 0.034 | 0.525 | 0.16  | -2.977 | 0.003 | 0.29  | 0.952 |
| COL14A1 | -0.608 | 0.303 | -2.011 | 0.044 | 0.544 | 0.165 | -2.768 | 0.006 | 0.301 | 0.985 |
| COL13A1 | -0.142 | 0.296 | -0.479 | 0.632 | 0.868 | 0.257 | -0.515 | 0.607 | 0.486 | 1.55  |
| COL11A2 | 0.056  | 0.295 | 0.189  | 0.85  | 1.057 | 0.312 | 0.184  | 0.854 | 0.593 | 1.886 |
| COL11A1 | -0.176 | 0.296 | -0.594 | 0.552 | 0.839 | 0.248 | -0.65  | 0.516 | 0.469 | 1.498 |
| COL10A1 | -0.424 | 0.3   | -1.414 | 0.157 | 0.655 | 0.196 | -1.761 | 0.078 | 0.364 | 1.178 |
| COIL    | 0.138  | 0.297 | 0.463  | 0.643 | 1.148 | 0.341 | 0.433  | 0.665 | 0.641 | 2.055 |
| COG7    | -0.487 | 0.302 | -1.61  | 0.107 | 0.615 | 0.186 | -2.074 | 0.038 | 0.34  | 1.112 |
| COG5    | -0.235 | 0.298 | -0.791 | 0.429 | 0.79  | 0.235 | -0.892 | 0.372 | 0.441 | 1.416 |
| COG4    | 0.84   | 0.315 | 2.668  | 0.008 | 2.316 | 0.729 | 1.805  | 0.071 | 1.25  | 4.292 |
| COG2    | -0.424 | 0.3   | -1.416 | 0.157 | 0.654 | 0.196 | -1.764 | 0.078 | 0.364 | 1.177 |
| COCH    | -0.19  | 0.296 | -0.642 | 0.521 | 0.827 | 0.245 | -0.707 | 0.479 | 0.463 | 1.476 |
| COBLL1  | 0.005  | 0.295 | 0.016  | 0.988 | 1.005 | 0.297 | 0.015  | 0.988 | 0.563 | 1.792 |
| COBL    | 0.162  | 0.296 | 0.548  | 0.584 | 1.176 | 0.348 | 0.506  | 0.613 | 0.658 | 2.102 |
| COASY   | 0.259  | 0.296 | 0.872  | 0.383 | 1.295 | 0.384 | 0.769  | 0.442 | 0.724 | 2.315 |

|           |        |       |        |       |       |       |        |       |       |       |
|-----------|--------|-------|--------|-------|-------|-------|--------|-------|-------|-------|
| COA7      | 0.829  | 0.31  | 2.67   | 0.008 | 2.291 | 0.711 | 1.815  | 0.07  | 1.247 | 4.211 |
| COA4      | 0.254  | 0.296 | 0.859  | 0.391 | 1.29  | 0.382 | 0.758  | 0.448 | 0.721 | 2.306 |
| COA3      | -0.137 | 0.297 | -0.462 | 0.644 | 0.872 | 0.259 | -0.495 | 0.621 | 0.487 | 1.56  |
| COA1      | 0.95   | 0.316 | 3.012  | 0.003 | 2.586 | 0.816 | 1.944  | 0.052 | 1.394 | 4.8   |
| CNTRL     | 0.325  | 0.297 | 1.093  | 0.275 | 1.384 | 0.412 | 0.933  | 0.351 | 0.773 | 2.48  |
| CNTNAP3P2 | 0.334  | 0.296 | 1.127  | 0.26  | 1.396 | 0.414 | 0.958  | 0.338 | 0.781 | 2.495 |
| CNTNAP2   | -0.217 | 0.297 | -0.73  | 0.465 | 0.805 | 0.239 | -0.815 | 0.415 | 0.45  | 1.441 |
| CNTNAP1   | 0.112  | 0.297 | 0.379  | 0.705 | 1.119 | 0.332 | 0.359  | 0.72  | 0.626 | 2.001 |
| CNTN6     | 0.221  | 0.296 | 0.746  | 0.456 | 1.247 | 0.369 | 0.669  | 0.503 | 0.698 | 2.229 |
| CNTN5     | 0.286  | 0.3   | 0.952  | 0.341 | 1.331 | 0.4   | 0.828  | 0.408 | 0.739 | 2.397 |
| CNTN2     | -0.072 | 0.296 | -0.242 | 0.809 | 0.931 | 0.276 | -0.25  | 0.802 | 0.521 | 1.663 |
| CNTN1     | -0.367 | 0.298 | -1.234 | 0.217 | 0.693 | 0.206 | -1.491 | 0.136 | 0.386 | 1.241 |
| CNTLN     | -0.19  | 0.296 | -0.64  | 0.522 | 0.827 | 0.245 | -0.705 | 0.481 | 0.463 | 1.478 |
| CNTFR     | -0.045 | 0.295 | -0.154 | 0.878 | 0.956 | 0.282 | -0.158 | 0.875 | 0.536 | 1.704 |
| CNTF      | 0.408  | 0.297 | 1.372  | 0.17  | 1.504 | 0.447 | 1.126  | 0.26  | 0.839 | 2.693 |
| CNR2      | -0.313 | 0.298 | -1.052 | 0.293 | 0.731 | 0.218 | -1.235 | 0.217 | 0.408 | 1.31  |
| CNR1      | -0.701 | 0.307 | -2.285 | 0.022 | 0.496 | 0.152 | -3.311 | 0.001 | 0.272 | 0.905 |
| CNPY4     | 0.249  | 0.296 | 0.843  | 0.399 | 1.283 | 0.38  | 0.746  | 0.456 | 0.719 | 2.292 |
| CNPY3     | 0.331  | 0.298 | 1.111  | 0.267 | 1.392 | 0.415 | 0.946  | 0.344 | 0.776 | 2.497 |
| CNPY2     | 0.08   | 0.296 | 0.272  | 0.786 | 1.084 | 0.32  | 0.261  | 0.794 | 0.607 | 1.934 |
| CNPPD1    | 0.348  | 0.3   | 1.163  | 0.245 | 1.417 | 0.424 | 0.982  | 0.326 | 0.788 | 2.549 |
| CNP       | 0.593  | 0.31  | 1.913  | 0.056 | 1.81  | 0.561 | 1.443  | 0.149 | 0.985 | 3.323 |
| CNOT9     | -0.093 | 0.296 | -0.314 | 0.753 | 0.911 | 0.269 | -0.329 | 0.742 | 0.511 | 1.626 |
| CNOT8     | -0.523 | 0.306 | -1.711 | 0.087 | 0.593 | 0.181 | -2.248 | 0.025 | 0.326 | 1.079 |
| CNOT7     | 0.515  | 0.301 | 1.711  | 0.087 | 1.674 | 0.504 | 1.337  | 0.181 | 0.928 | 3.02  |
| CNOT6     | 0.182  | 0.296 | 0.614  | 0.539 | 1.199 | 0.355 | 0.561  | 0.575 | 0.671 | 2.141 |
| CNOT4     | 0.114  | 0.296 | 0.384  | 0.701 | 1.121 | 0.332 | 0.363  | 0.717 | 0.627 | 2.003 |
| CNOT3     | 0.026  | 0.295 | 0.089  | 0.929 | 1.027 | 0.303 | 0.088  | 0.93  | 0.575 | 1.831 |
| CNOT2     | 0.218  | 0.296 | 0.735  | 0.462 | 1.243 | 0.368 | 0.661  | 0.509 | 0.696 | 2.223 |
| CNOT1     | 0.309  | 0.298 | 1.037  | 0.3   | 1.362 | 0.405 | 0.892  | 0.372 | 0.76  | 2.441 |
| CNNM4     | 0.057  | 0.295 | 0.194  | 0.846 | 1.059 | 0.313 | 0.189  | 0.85  | 0.594 | 1.889 |
| CNNM3     | -0.331 | 0.298 | -1.112 | 0.266 | 0.718 | 0.214 | -1.318 | 0.187 | 0.401 | 1.287 |
| CNNM2     | -0.44  | 0.302 | -1.455 | 0.146 | 0.644 | 0.195 | -1.827 | 0.068 | 0.356 | 1.165 |
| CNNM1     | 0.03   | 0.295 | 0.101  | 0.919 | 1.03  | 0.304 | 0.1    | 0.921 | 0.578 | 1.837 |
| CNN3      | -0.093 | 0.295 | -0.315 | 0.753 | 0.911 | 0.269 | -0.33  | 0.742 | 0.511 | 1.626 |
| CNN2      | -0.586 | 0.302 | -1.939 | 0.053 | 0.556 | 0.168 | -2.636 | 0.008 | 0.308 | 1.006 |
| CNN1      | -0.452 | 0.298 | -1.515 | 0.13  | 0.636 | 0.19  | -1.915 | 0.055 | 0.355 | 1.142 |
| CNMD      | 0.289  | 0.298 | 0.972  | 0.331 | 1.335 | 0.397 | 0.844  | 0.399 | 0.745 | 2.393 |

|        |        |       |        |       |       |       |        |       |       |       |
|--------|--------|-------|--------|-------|-------|-------|--------|-------|-------|-------|
| CNKS2  | 0.104  | 0.297 | 0.35   | 0.726 | 1.11  | 0.33  | 0.332  | 0.74  | 0.62  | 1.986 |
| CNKS1  | 0.581  | 0.303 | 1.915  | 0.055 | 1.787 | 0.542 | 1.453  | 0.146 | 0.986 | 3.238 |
| CNIH4  | 0.414  | 0.3   | 1.383  | 0.167 | 1.513 | 0.453 | 1.133  | 0.257 | 0.841 | 2.722 |
| CNIH3  | -0.207 | 0.295 | -0.702 | 0.483 | 0.813 | 0.24  | -0.78  | 0.435 | 0.455 | 1.45  |
| CNIH1  | 0.347  | 0.3   | 1.157  | 0.247 | 1.414 | 0.424 | 0.978  | 0.328 | 0.786 | 2.545 |
| CNGB3  | -0.175 | 0.296 | -0.591 | 0.555 | 0.84  | 0.248 | -0.645 | 0.519 | 0.471 | 1.499 |
| CNGB1  | -0.174 | 0.295 | -0.589 | 0.556 | 0.84  | 0.248 | -0.643 | 0.52  | 0.471 | 1.499 |
| CNGA3  | -0.087 | 0.295 | -0.293 | 0.769 | 0.917 | 0.271 | -0.306 | 0.76  | 0.514 | 1.636 |
| CNGA1  | 0.285  | 0.298 | 0.956  | 0.339 | 1.329 | 0.396 | 0.832  | 0.405 | 0.742 | 2.383 |
| CNDP2  | 0.201  | 0.296 | 0.68   | 0.497 | 1.223 | 0.362 | 0.616  | 0.538 | 0.684 | 2.185 |
| CNBP   | -0.197 | 0.296 | -0.665 | 0.506 | 0.821 | 0.243 | -0.735 | 0.462 | 0.459 | 1.468 |
| CMTR1  | -0.126 | 0.296 | -0.427 | 0.669 | 0.881 | 0.261 | -0.455 | 0.649 | 0.493 | 1.574 |
| CMTM6  | -0.29  | 0.3   | -0.967 | 0.334 | 0.748 | 0.225 | -1.122 | 0.262 | 0.415 | 1.347 |
| CMPK1  | -0.33  | 0.298 | -1.106 | 0.269 | 0.719 | 0.214 | -1.31  | 0.19  | 0.401 | 1.29  |
| CMKLR1 | 0.099  | 0.295 | 0.336  | 0.737 | 1.104 | 0.326 | 0.32   | 0.749 | 0.619 | 1.97  |
| CMC4   | 0.569  | 0.304 | 1.871  | 0.061 | 1.766 | 0.537 | 1.427  | 0.154 | 0.973 | 3.204 |
| CMC2   | 1.068  | 0.328 | 3.259  | 0.001 | 2.909 | 0.953 | 2.003  | 0.045 | 1.531 | 5.529 |
| CMAS   | 0.124  | 0.296 | 0.42   | 0.675 | 1.132 | 0.335 | 0.395  | 0.693 | 0.634 | 2.021 |
| CMAHP  | -0.483 | 0.301 | -1.606 | 0.108 | 0.617 | 0.185 | -2.065 | 0.039 | 0.342 | 1.112 |
| CMA1   | -0.083 | 0.296 | -0.281 | 0.778 | 0.92  | 0.272 | -0.294 | 0.769 | 0.515 | 1.643 |
| CLUL1  | -0.075 | 0.295 | -0.254 | 0.8   | 0.928 | 0.274 | -0.263 | 0.792 | 0.52  | 1.656 |
| CLUHP3 | 0.128  | 0.296 | 0.431  | 0.667 | 1.136 | 0.337 | 0.404  | 0.686 | 0.636 | 2.03  |
| CLUH   | 0.581  | 0.306 | 1.902  | 0.057 | 1.788 | 0.546 | 1.442  | 0.149 | 0.982 | 3.255 |
| CLUAP1 | -0.52  | 0.302 | -1.72  | 0.085 | 0.595 | 0.18  | -2.256 | 0.024 | 0.329 | 1.075 |
| CLU    | -0.95  | 0.321 | -2.964 | 0.003 | 0.387 | 0.124 | -4.949 | 0     | 0.206 | 0.725 |
| CLTCL1 | -0.288 | 0.298 | -0.968 | 0.333 | 0.75  | 0.223 | -1.122 | 0.262 | 0.418 | 1.344 |
| CLTC   | -0.154 | 0.296 | -0.521 | 0.602 | 0.857 | 0.254 | -0.564 | 0.573 | 0.48  | 1.531 |
| CLTB   | -0.064 | 0.297 | -0.217 | 0.828 | 0.938 | 0.278 | -0.224 | 0.823 | 0.524 | 1.678 |
| CLTA   | 0.083  | 0.298 | 0.279  | 0.78  | 1.087 | 0.324 | 0.268  | 0.789 | 0.606 | 1.948 |
| CLSTN3 | 0.399  | 0.3   | 1.331  | 0.183 | 1.49  | 0.446 | 1.098  | 0.272 | 0.828 | 2.68  |
| CLSTN2 | -0.058 | 0.302 | -0.193 | 0.847 | 0.943 | 0.285 | -0.199 | 0.842 | 0.522 | 1.704 |
| CLSTN1 | -0.505 | 0.306 | -1.65  | 0.099 | 0.604 | 0.185 | -2.146 | 0.032 | 0.332 | 1.1   |
| CLSPN  | 0.234  | 0.296 | 0.789  | 0.43  | 1.263 | 0.374 | 0.704  | 0.482 | 0.707 | 2.257 |
| CLPX   | 0.42   | 0.298 | 1.41   | 0.159 | 1.522 | 0.454 | 1.151  | 0.25  | 0.849 | 2.73  |
| CLPTM1 | -0.526 | 0.306 | -1.721 | 0.085 | 0.591 | 0.181 | -2.264 | 0.024 | 0.325 | 1.076 |
| CLPS   | 0.114  | 0.295 | 0.385  | 0.7   | 1.12  | 0.331 | 0.364  | 0.716 | 0.628 | 1.999 |
| CLPP   | 0.166  | 0.296 | 0.562  | 0.574 | 1.181 | 0.35  | 0.518  | 0.604 | 0.661 | 2.11  |
| CLPB   | 0.641  | 0.306 | 2.095  | 0.036 | 1.899 | 0.581 | 1.547  | 0.122 | 1.042 | 3.459 |

|         |        |       |        |       |       |       |        |       |       |       |
|---------|--------|-------|--------|-------|-------|-------|--------|-------|-------|-------|
| CLP1    | 0.718  | 0.31  | 2.318  | 0.02  | 2.05  | 0.635 | 1.654  | 0.098 | 1.117 | 3.762 |
| CLOCK   | -0.187 | 0.296 | -0.631 | 0.528 | 0.83  | 0.246 | -0.693 | 0.488 | 0.464 | 1.482 |
| CLNS1A  | -0.063 | 0.295 | -0.213 | 0.831 | 0.939 | 0.277 | -0.22  | 0.826 | 0.526 | 1.675 |
| CLN8    | -0.349 | 0.299 | -1.167 | 0.243 | 0.705 | 0.211 | -1.397 | 0.162 | 0.392 | 1.268 |
| CLN6    | 0.422  | 0.3   | 1.409  | 0.159 | 1.525 | 0.457 | 1.149  | 0.25  | 0.848 | 2.744 |
| CLN5    | -0.259 | 0.297 | -0.871 | 0.384 | 0.772 | 0.229 | -0.995 | 0.32  | 0.431 | 1.381 |
| CLN3    | -0.427 | 0.3   | -1.423 | 0.155 | 0.653 | 0.196 | -1.775 | 0.076 | 0.363 | 1.174 |
| CLMN    | -0.704 | 0.306 | -2.303 | 0.021 | 0.495 | 0.151 | -3.342 | 0.001 | 0.272 | 0.901 |
| CLK4    | -0.166 | 0.295 | -0.561 | 0.575 | 0.847 | 0.25  | -0.61  | 0.542 | 0.475 | 1.512 |
| CLK3    | -0.324 | 0.298 | -1.085 | 0.278 | 0.724 | 0.216 | -1.281 | 0.2   | 0.403 | 1.298 |
| CLK2    | -0.155 | 0.295 | -0.524 | 0.6   | 0.857 | 0.253 | -0.567 | 0.571 | 0.48  | 1.528 |
| CLK1    | -0.403 | 0.299 | -1.35  | 0.177 | 0.668 | 0.2   | -1.663 | 0.096 | 0.372 | 1.2   |
| CLIP4   | 0.046  | 0.295 | 0.154  | 0.877 | 1.047 | 0.309 | 0.151  | 0.88  | 0.587 | 1.867 |
| CLIP3   | 0.057  | 0.298 | 0.19   | 0.849 | 1.058 | 0.315 | 0.185  | 0.853 | 0.591 | 1.896 |
| CLIP2   | -0.205 | 0.297 | -0.693 | 0.489 | 0.814 | 0.242 | -0.769 | 0.442 | 0.455 | 1.456 |
| CLIP1   | -0.327 | 0.299 | -1.096 | 0.273 | 0.721 | 0.215 | -1.296 | 0.195 | 0.402 | 1.294 |
| CLINT1  | -0.307 | 0.298 | -1.033 | 0.301 | 0.735 | 0.219 | -1.21  | 0.226 | 0.41  | 1.318 |
| CLIC5   | -0.169 | 0.299 | -0.564 | 0.573 | 0.845 | 0.253 | -0.615 | 0.539 | 0.47  | 1.518 |
| CLIC4   | -0.308 | 0.298 | -1.033 | 0.302 | 0.735 | 0.219 | -1.21  | 0.226 | 0.41  | 1.318 |
| CLIC3   | -0.089 | 0.295 | -0.302 | 0.763 | 0.915 | 0.27  | -0.316 | 0.752 | 0.513 | 1.632 |
| CLIC2   | -0.125 | 0.295 | -0.423 | 0.672 | 0.883 | 0.261 | -0.451 | 0.652 | 0.495 | 1.575 |
| CLIC1   | 0.662  | 0.306 | 2.16   | 0.031 | 1.938 | 0.594 | 1.58   | 0.114 | 1.063 | 3.533 |
| CLGN    | -0.197 | 0.298 | -0.659 | 0.51  | 0.822 | 0.245 | -0.729 | 0.466 | 0.458 | 1.473 |
| CLEC7A  | 0.177  | 0.296 | 0.599  | 0.549 | 1.194 | 0.353 | 0.549  | 0.583 | 0.669 | 2.131 |
| CLEC5A  | 0.24   | 0.296 | 0.809  | 0.418 | 1.271 | 0.377 | 0.719  | 0.472 | 0.711 | 2.272 |
| CLEC4M  | -0.084 | 0.295 | -0.285 | 0.776 | 0.919 | 0.272 | -0.297 | 0.766 | 0.515 | 1.64  |
| CLEC4E  | 0.169  | 0.295 | 0.57   | 0.568 | 1.184 | 0.35  | 0.525  | 0.6   | 0.663 | 2.112 |
| CLEC4A  | -0.316 | 0.3   | -1.055 | 0.291 | 0.729 | 0.218 | -1.241 | 0.215 | 0.405 | 1.311 |
| CLEC2D  | -0.34  | 0.298 | -1.143 | 0.253 | 0.712 | 0.212 | -1.362 | 0.173 | 0.397 | 1.275 |
| CLEC2B  | -0.896 | 0.311 | -2.882 | 0.004 | 0.408 | 0.127 | -4.663 | 0     | 0.222 | 0.751 |
| CLEC1B  | -0.2   | 0.296 | -0.674 | 0.5   | 0.819 | 0.243 | -0.746 | 0.456 | 0.458 | 1.464 |
| CLEC1A  | 0.012  | 0.295 | 0.04   | 0.968 | 1.012 | 0.298 | 0.04   | 0.968 | 0.568 | 1.804 |
| CLEC16A | 0.114  | 0.297 | 0.384  | 0.701 | 1.121 | 0.332 | 0.363  | 0.717 | 0.627 | 2.004 |
| CLEC11A | -0.294 | 0.297 | -0.989 | 0.323 | 0.745 | 0.222 | -1.15  | 0.25  | 0.416 | 1.335 |
| CLEC10A | -0.637 | 0.306 | -2.085 | 0.037 | 0.529 | 0.162 | -2.916 | 0.004 | 0.29  | 0.962 |
| CLDND1  | -0.501 | 0.302 | -1.657 | 0.097 | 0.606 | 0.183 | -2.152 | 0.031 | 0.335 | 1.096 |
| CLDN9   | 0.192  | 0.296 | 0.648  | 0.517 | 1.211 | 0.358 | 0.59   | 0.555 | 0.678 | 2.163 |
| CLDN8   | -0.489 | 0.301 | -1.628 | 0.104 | 0.613 | 0.184 | -2.099 | 0.036 | 0.34  | 1.105 |



|        |        |       |        |       |       |       |        |       |       |       |
|--------|--------|-------|--------|-------|-------|-------|--------|-------|-------|-------|
| CLDN7  | 0.258  | 0.296 | 0.872  | 0.383 | 1.295 | 0.383 | 0.768  | 0.442 | 0.725 | 2.313 |
| CLDN6  | -0.114 | 0.296 | -0.386 | 0.7   | 0.892 | 0.264 | -0.409 | 0.683 | 0.499 | 1.594 |
| CLDN5  | -0.066 | 0.295 | -0.224 | 0.822 | 0.936 | 0.277 | -0.232 | 0.817 | 0.524 | 1.67  |
| CLDN4  | 0.055  | 0.295 | 0.185  | 0.853 | 1.056 | 0.312 | 0.18   | 0.857 | 0.592 | 1.883 |
| CLDN3  | 0.175  | 0.296 | 0.589  | 0.556 | 1.191 | 0.353 | 0.54   | 0.589 | 0.666 | 2.129 |
| CLDN18 | 0.187  | 0.296 | 0.63   | 0.529 | 1.205 | 0.357 | 0.575  | 0.565 | 0.674 | 2.154 |
| CLDN17 | -0.112 | 0.298 | -0.375 | 0.707 | 0.894 | 0.266 | -0.397 | 0.691 | 0.499 | 1.603 |
| CLDN16 | 0.024  | 0.296 | 0.083  | 0.934 | 1.025 | 0.303 | 0.082  | 0.935 | 0.574 | 1.829 |
| CLDN15 | 0.432  | 0.3   | 1.442  | 0.149 | 1.541 | 0.462 | 1.171  | 0.242 | 0.856 | 2.773 |
| CLDN14 | 0.385  | 0.298 | 1.293  | 0.196 | 1.47  | 0.438 | 1.073  | 0.283 | 0.82  | 2.635 |
| CLDN11 | -0.706 | 0.309 | -2.285 | 0.022 | 0.494 | 0.152 | -3.319 | 0.001 | 0.27  | 0.905 |
| CLDN10 | 0.082  | 0.295 | 0.279  | 0.78  | 1.086 | 0.321 | 0.268  | 0.789 | 0.609 | 1.937 |
| CLDN1  | 0.283  | 0.296 | 0.956  | 0.339 | 1.327 | 0.393 | 0.832  | 0.405 | 0.743 | 2.373 |
| CLCNKB | 0.252  | 0.296 | 0.852  | 0.394 | 1.287 | 0.381 | 0.753  | 0.451 | 0.72  | 2.3   |
| CLCN7  | -0.193 | 0.296 | -0.653 | 0.514 | 0.824 | 0.244 | -0.72  | 0.471 | 0.461 | 1.472 |
| CLCN6  | -0.149 | 0.296 | -0.503 | 0.615 | 0.862 | 0.255 | -0.542 | 0.588 | 0.482 | 1.54  |
| CLCN5  | 0.207  | 0.298 | 0.694  | 0.488 | 1.23  | 0.367 | 0.627  | 0.531 | 0.686 | 2.206 |
| CLCN4  | 0.264  | 0.298 | 0.888  | 0.375 | 1.303 | 0.388 | 0.78   | 0.435 | 0.727 | 2.335 |
| CLCN3  | -0.143 | 0.296 | -0.482 | 0.63  | 0.867 | 0.257 | -0.518 | 0.604 | 0.485 | 1.549 |
| CLCN2  | 0.868  | 0.31  | 2.797  | 0.005 | 2.381 | 0.739 | 1.87   | 0.061 | 1.297 | 4.374 |
| CLCN1  | 0.195  | 0.298 | 0.653  | 0.514 | 1.215 | 0.363 | 0.593  | 0.553 | 0.677 | 2.181 |
| CLCF1  | 0.201  | 0.296 | 0.679  | 0.497 | 1.223 | 0.362 | 0.615  | 0.539 | 0.684 | 2.186 |
| CLCC1  | 0.303  | 0.3   | 1.011  | 0.312 | 1.354 | 0.406 | 0.872  | 0.383 | 0.753 | 2.436 |
| CLCA4  | -0.233 | 0.297 | -0.786 | 0.432 | 0.792 | 0.235 | -0.885 | 0.376 | 0.442 | 1.417 |
| CLCA3P | 1.108  | 0.329 | 3.37   | 0.001 | 3.029 | 0.996 | 2.037  | 0.042 | 1.59  | 5.77  |
| CLCA2  | -0.253 | 0.297 | -0.852 | 0.394 | 0.777 | 0.23  | -0.969 | 0.333 | 0.434 | 1.389 |
| CLCA1  | 0.53   | 0.306 | 1.732  | 0.083 | 1.699 | 0.519 | 1.345  | 0.179 | 0.933 | 3.093 |
| CLC    | -0.369 | 0.299 | -1.232 | 0.218 | 0.692 | 0.207 | -1.49  | 0.136 | 0.385 | 1.243 |
| CLBA1  | 0.234  | 0.297 | 0.788  | 0.431 | 1.263 | 0.375 | 0.702  | 0.482 | 0.706 | 2.259 |
| CLASRP | -0.221 | 0.297 | -0.743 | 0.457 | 0.802 | 0.238 | -0.832 | 0.405 | 0.448 | 1.435 |
| CLASP2 | -0.464 | 0.302 | -1.534 | 0.125 | 0.629 | 0.19  | -1.952 | 0.051 | 0.348 | 1.137 |
| CLASP1 | 0.455  | 0.302 | 1.507  | 0.132 | 1.577 | 0.477 | 1.21   | 0.226 | 0.872 | 2.851 |
| CKS2   | 1.351  | 0.346 | 3.905  | 0     | 3.862 | 1.337 | 2.142  | 0.032 | 1.96  | 7.61  |
| CKS1B  | 0.426  | 0.298 | 1.43   | 0.153 | 1.531 | 0.456 | 1.164  | 0.244 | 0.854 | 2.744 |
| CKMT2  | -0.149 | 0.295 | -0.505 | 0.614 | 0.861 | 0.255 | -0.545 | 0.586 | 0.483 | 1.537 |
| CKM    | 0.084  | 0.297 | 0.284  | 0.776 | 1.088 | 0.323 | 0.272  | 0.785 | 0.608 | 1.948 |
| CKLF   | 0.576  | 0.302 | 1.904  | 0.057 | 1.778 | 0.538 | 1.448  | 0.148 | 0.983 | 3.216 |
| CKB    | -0.255 | 0.296 | -0.862 | 0.389 | 0.775 | 0.229 | -0.982 | 0.326 | 0.434 | 1.384 |

|         |        |       |        |       |       |       |        |       |       |       |
|---------|--------|-------|--------|-------|-------|-------|--------|-------|-------|-------|
| CKAP5   | 0.632  | 0.31  | 2.04   | 0.041 | 1.882 | 0.583 | 1.512  | 0.131 | 1.025 | 3.454 |
| CKAP4   | -0.203 | 0.296 | -0.686 | 0.493 | 0.816 | 0.242 | -0.76  | 0.447 | 0.457 | 1.459 |
| CKAP2   | 0.758  | 0.31  | 2.449  | 0.014 | 2.135 | 0.661 | 1.716  | 0.086 | 1.163 | 3.918 |
| CIZ1    | -0.308 | 0.298 | -1.035 | 0.301 | 0.735 | 0.219 | -1.212 | 0.225 | 0.41  | 1.317 |
| CITED2  | -0.751 | 0.307 | -2.444 | 0.015 | 0.472 | 0.145 | -3.642 | 0     | 0.258 | 0.862 |
| CITED1  | 0.194  | 0.296 | 0.657  | 0.511 | 1.214 | 0.359 | 0.597  | 0.55  | 0.68  | 2.167 |
| CISH    | -0.082 | 0.295 | -0.276 | 0.783 | 0.922 | 0.272 | -0.288 | 0.774 | 0.517 | 1.645 |
| CISD1   | 0.402  | 0.298 | 1.348  | 0.178 | 1.495 | 0.446 | 1.11   | 0.267 | 0.833 | 2.683 |
| CIRBP   | -0.424 | 0.302 | -1.402 | 0.161 | 0.655 | 0.198 | -1.746 | 0.081 | 0.362 | 1.184 |
| CIR1    | 0.048  | 0.296 | 0.162  | 0.871 | 1.049 | 0.31  | 0.159  | 0.874 | 0.588 | 1.873 |
| CINP    | 0.369  | 0.3   | 1.233  | 0.218 | 1.447 | 0.434 | 1.031  | 0.303 | 0.804 | 2.603 |
| CILP    | -0.493 | 0.3   | -1.647 | 0.1   | 0.611 | 0.183 | -2.129 | 0.033 | 0.339 | 1.098 |
| CILK1   | -0.031 | 0.296 | -0.103 | 0.918 | 0.97  | 0.287 | -0.105 | 0.916 | 0.543 | 1.732 |
| CIITA   | -0.735 | 0.31  | -2.369 | 0.018 | 0.479 | 0.149 | -3.499 | 0     | 0.261 | 0.881 |
| CIDEC   | 0.135  | 0.296 | 0.456  | 0.648 | 1.145 | 0.339 | 0.427  | 0.67  | 0.64  | 2.046 |
| CIDEB   | -0.321 | 0.3   | -1.072 | 0.284 | 0.725 | 0.217 | -1.264 | 0.206 | 0.403 | 1.305 |
| CIDEA   | -0.071 | 0.296 | -0.241 | 0.81  | 0.931 | 0.276 | -0.25  | 0.803 | 0.521 | 1.665 |
| CIC     | -0.238 | 0.297 | -0.803 | 0.422 | 0.788 | 0.234 | -0.907 | 0.365 | 0.441 | 1.41  |
| CIB2    | 0.219  | 0.298 | 0.734  | 0.463 | 1.244 | 0.371 | 0.66   | 0.51  | 0.694 | 2.231 |
| CIB1    | -0.179 | 0.299 | -0.599 | 0.549 | 0.836 | 0.25  | -0.656 | 0.512 | 0.466 | 1.501 |
| CIAPIN1 | 0.479  | 0.3   | 1.597  | 0.11  | 1.614 | 0.484 | 1.269  | 0.204 | 0.897 | 2.903 |
| CIAO3   | -0.11  | 0.296 | -0.372 | 0.71  | 0.896 | 0.265 | -0.393 | 0.694 | 0.501 | 1.601 |
| CIAO2B  | 0.457  | 0.3   | 1.523  | 0.128 | 1.579 | 0.474 | 1.222  | 0.222 | 0.877 | 2.843 |
| CIAO1   | -0.259 | 0.298 | -0.871 | 0.384 | 0.772 | 0.23  | -0.994 | 0.32  | 0.43  | 1.383 |
| CHUK    | 0.386  | 0.298 | 1.296  | 0.195 | 1.471 | 0.438 | 1.075  | 0.282 | 0.821 | 2.636 |
| CHTOP   | -0.327 | 0.298 | -1.099 | 0.272 | 0.721 | 0.215 | -1.299 | 0.194 | 0.403 | 1.292 |
| CHSY1   | 0.066  | 0.296 | 0.223  | 0.824 | 1.068 | 0.316 | 0.216  | 0.829 | 0.599 | 1.906 |
| CHST8   | 0.531  | 0.301 | 1.763  | 0.078 | 1.701 | 0.513 | 1.367  | 0.171 | 0.942 | 3.071 |
| CHST7   | -0.218 | 0.296 | -0.735 | 0.463 | 0.804 | 0.238 | -0.821 | 0.412 | 0.45  | 1.438 |
| CHST5   | -0.024 | 0.296 | -0.081 | 0.935 | 0.976 | 0.289 | -0.082 | 0.935 | 0.546 | 1.745 |
| CHST4   | 0.044  | 0.295 | 0.149  | 0.881 | 1.045 | 0.309 | 0.146  | 0.884 | 0.586 | 1.865 |
| CHST3   | -0.165 | 0.296 | -0.559 | 0.576 | 0.848 | 0.251 | -0.608 | 0.543 | 0.474 | 1.514 |
| CHST2   | -0.404 | 0.298 | -1.353 | 0.176 | 0.668 | 0.199 | -1.667 | 0.095 | 0.372 | 1.198 |
| CHST15  | -0.639 | 0.31  | -2.062 | 0.039 | 0.528 | 0.164 | -2.887 | 0.004 | 0.287 | 0.969 |
| CHST12  | 0.132  | 0.296 | 0.446  | 0.656 | 1.141 | 0.337 | 0.417  | 0.676 | 0.639 | 2.036 |
| CHST11  | 0.313  | 0.298 | 1.05   | 0.294 | 1.367 | 0.407 | 0.902  | 0.367 | 0.763 | 2.45  |
| CHST10  | 0.119  | 0.295 | 0.404  | 0.687 | 1.127 | 0.333 | 0.38   | 0.704 | 0.632 | 2.01  |
| CHST1   | -0.062 | 0.295 | -0.21  | 0.834 | 0.94  | 0.278 | -0.216 | 0.829 | 0.527 | 1.677 |

|         |        |       |        |       |       |       |        |       |       |       |
|---------|--------|-------|--------|-------|-------|-------|--------|-------|-------|-------|
| CHRNA9  | -0.069 | 0.295 | -0.232 | 0.816 | 0.934 | 0.276 | -0.24  | 0.81  | 0.523 | 1.666 |
| CHRNA6  | -0.561 | 0.306 | -1.834 | 0.067 | 0.571 | 0.175 | -2.46  | 0.014 | 0.313 | 1.039 |
| CHRNA5  | 0.318  | 0.298 | 1.07   | 0.285 | 1.375 | 0.409 | 0.916  | 0.36  | 0.767 | 2.463 |
| CHRNA4  | -0.211 | 0.296 | -0.714 | 0.475 | 0.809 | 0.24  | -0.795 | 0.427 | 0.453 | 1.446 |
| CHRNA3  | -0.41  | 0.3   | -1.368 | 0.171 | 0.663 | 0.199 | -1.691 | 0.091 | 0.368 | 1.194 |
| CHRNA2  | 0.125  | 0.297 | 0.419  | 0.675 | 1.133 | 0.337 | 0.394  | 0.694 | 0.632 | 2.028 |
| CHRNA10 | 0.39   | 0.3   | 1.302  | 0.193 | 1.477 | 0.443 | 1.078  | 0.281 | 0.821 | 2.657 |
| CHRNA1  | 0.228  | 0.296 | 0.769  | 0.442 | 1.256 | 0.372 | 0.688  | 0.491 | 0.703 | 2.245 |
| CHRM5   | 0.081  | 0.295 | 0.274  | 0.784 | 1.084 | 0.32  | 0.263  | 0.792 | 0.608 | 1.935 |
| CHRM4   | 0.299  | 0.3   | 0.996  | 0.319 | 1.348 | 0.404 | 0.861  | 0.389 | 0.749 | 2.426 |
| CHRM3   | -0.478 | 0.301 | -1.591 | 0.112 | 0.62  | 0.186 | -2.041 | 0.041 | 0.344 | 1.117 |
| CHRM2   | 0.034  | 0.296 | 0.116  | 0.908 | 1.035 | 0.306 | 0.114  | 0.91  | 0.58  | 1.847 |
| CHRD1   | -0.247 | 0.296 | -0.833 | 0.405 | 0.781 | 0.231 | -0.945 | 0.345 | 0.437 | 1.396 |
| CHRD    | 0.224  | 0.296 | 0.755  | 0.451 | 1.251 | 0.371 | 0.676  | 0.499 | 0.7   | 2.236 |
| CHPT1   | -0.304 | 0.303 | -1.004 | 0.315 | 0.738 | 0.223 | -1.174 | 0.24  | 0.408 | 1.335 |
| CHPF2   | -0.386 | 0.298 | -1.296 | 0.195 | 0.68  | 0.203 | -1.581 | 0.114 | 0.379 | 1.219 |
| CHPF    | -0.173 | 0.296 | -0.584 | 0.559 | 0.841 | 0.249 | -0.637 | 0.524 | 0.47  | 1.504 |
| CHP2    | -0.246 | 0.296 | -0.829 | 0.407 | 0.782 | 0.232 | -0.94  | 0.347 | 0.438 | 1.398 |
| CHP1    | -0.525 | 0.306 | -1.718 | 0.086 | 0.592 | 0.181 | -2.26  | 0.024 | 0.325 | 1.077 |
| CHORDC1 | 0.281  | 0.301 | 0.934  | 0.35  | 1.325 | 0.399 | 0.814  | 0.416 | 0.734 | 2.39  |
| CHODL   | 0.627  | 0.304 | 2.063  | 0.039 | 1.873 | 0.569 | 1.532  | 0.125 | 1.032 | 3.398 |
| CHN2    | 0.06   | 0.295 | 0.203  | 0.839 | 1.062 | 0.313 | 0.197  | 0.844 | 0.595 | 1.894 |
| CHN1    | -0.291 | 0.298 | -0.975 | 0.33  | 0.748 | 0.223 | -1.131 | 0.258 | 0.417 | 1.341 |
| CHMP7   | -0.353 | 0.304 | -1.16  | 0.246 | 0.703 | 0.214 | -1.391 | 0.164 | 0.388 | 1.275 |
| CHMP6   | 0.372  | 0.298 | 1.25   | 0.211 | 1.451 | 0.433 | 1.043  | 0.297 | 0.809 | 2.603 |
| CHMP5   | -0.071 | 0.297 | -0.238 | 0.812 | 0.932 | 0.277 | -0.247 | 0.805 | 0.52  | 1.668 |
| CHMP2B  | -0.367 | 0.303 | -1.21  | 0.226 | 0.693 | 0.21  | -1.461 | 0.144 | 0.382 | 1.256 |
| CHMP2A  | 0.32   | 0.298 | 1.074  | 0.283 | 1.377 | 0.41  | 0.919  | 0.358 | 0.768 | 2.467 |
| CHMP1B  | -0.243 | 0.298 | -0.816 | 0.415 | 0.784 | 0.233 | -0.923 | 0.356 | 0.438 | 1.406 |
| CHMP1A  | 0.509  | 0.3   | 1.698  | 0.089 | 1.663 | 0.498 | 1.331  | 0.183 | 0.925 | 2.992 |
| CHML    | 0.57   | 0.306 | 1.865  | 0.062 | 1.769 | 0.541 | 1.421  | 0.155 | 0.971 | 3.221 |
| CHRNA9  | 0.328  | 0.298 | 1.1    | 0.271 | 1.388 | 0.413 | 0.938  | 0.348 | 0.774 | 2.488 |
| CHRNE   | -0.231 | 0.298 | -0.776 | 0.438 | 0.794 | 0.236 | -0.873 | 0.383 | 0.443 | 1.423 |
| CHRND   | 0.188  | 0.297 | 0.635  | 0.526 | 1.207 | 0.358 | 0.579  | 0.563 | 0.675 | 2.159 |
| CHRNA4  | -0.058 | 0.295 | -0.198 | 0.843 | 0.943 | 0.279 | -0.204 | 0.839 | 0.529 | 1.683 |
| CHRNA3  | -0.204 | 0.296 | -0.691 | 0.49  | 0.815 | 0.241 | -0.766 | 0.444 | 0.457 | 1.455 |
| CHRNA2  | 0.236  | 0.296 | 0.796  | 0.426 | 1.266 | 0.375 | 0.709  | 0.478 | 0.708 | 2.261 |
| CHRNA1  | 0.046  | 0.298 | 0.153  | 0.878 | 1.047 | 0.312 | 0.15   | 0.881 | 0.584 | 1.877 |
| CHRNA9  | -0.069 | 0.295 | -0.232 | 0.816 | 0.934 | 0.276 | -0.24  | 0.81  | 0.523 | 1.666 |
| CHRNA6  | -0.561 | 0.306 | -1.834 | 0.067 | 0.571 | 0.175 | -2.46  | 0.014 | 0.313 | 1.039 |
| CHRNA5  | 0.318  | 0.298 | 1.07   | 0.285 | 1.375 | 0.409 | 0.916  | 0.36  | 0.767 | 2.463 |
| CHRNA4  | -0.211 | 0.296 | -0.714 | 0.475 | 0.809 | 0.24  | -0.795 | 0.427 | 0.453 | 1.446 |
| CHRNA3  | -0.41  | 0.3   | -1.368 | 0.171 | 0.663 | 0.199 | -1.691 | 0.091 | 0.368 | 1.194 |
| CHRNA2  | 0.125  | 0.297 | 0.419  | 0.675 | 1.133 | 0.337 | 0.394  | 0.694 | 0.632 | 2.028 |
| CHRNA10 | 0.39   | 0.3   | 1.302  | 0.193 | 1.477 | 0.443 | 1.078  | 0.281 | 0.821 | 2.657 |
| CHRNA1  | 0.228  | 0.296 | 0.769  | 0.442 | 1.256 | 0.372 | 0.688  | 0.491 | 0.703 | 2.245 |
| CHRM5   | 0.081  | 0.295 | 0.274  | 0.784 | 1.084 | 0.32  | 0.263  | 0.792 | 0.608 | 1.935 |
| CHRM4   | 0.299  | 0.3   | 0.996  | 0.319 | 1.348 | 0.404 | 0.861  | 0.389 | 0.749 | 2.426 |
| CHRM3   | -0.478 | 0.301 | -1.591 | 0.112 | 0.62  | 0.186 | -2.041 | 0.041 | 0.344 | 1.117 |
| CHRM2   | 0.034  | 0.296 | 0.116  | 0.908 | 1.035 | 0.306 | 0.114  | 0.91  | 0.58  | 1.847 |
| CHRD1   | -0.247 | 0.296 | -0.833 | 0.405 | 0.781 | 0.231 | -0.945 | 0.345 | 0.437 | 1.396 |
| CHRD    | 0.224  | 0.296 | 0.755  | 0.451 | 1.251 | 0.371 | 0.676  | 0.499 | 0.7   | 2.236 |
| CHPT1   | -0.304 | 0.303 | -1.004 | 0.315 | 0.738 | 0.223 | -1.174 | 0.24  | 0.408 | 1.335 |
| CHPF2   | -0.386 | 0.298 | -1.296 | 0.195 | 0.68  | 0.203 | -1.581 | 0.114 | 0.379 | 1.219 |
| CHPF    | -0.173 | 0.296 | -0.584 | 0.559 | 0.841 | 0.249 | -0.637 | 0.524 | 0.47  | 1.504 |
| CHP2    | -0.246 | 0.296 | -0.829 | 0.407 | 0.782 | 0.232 | -0.94  | 0.347 | 0.438 | 1.398 |
| CHP1    | -0.525 | 0.306 | -1.718 | 0.086 | 0.592 | 0.181 | -2.26  | 0.024 | 0.325 | 1.077 |
| CHORDC1 | 0.281  | 0.301 | 0.934  | 0.35  | 1.325 | 0.399 | 0.814  | 0.416 | 0.734 | 2.39  |
| CHODL   | 0.627  | 0.304 | 2.063  | 0.039 | 1.873 | 0.569 | 1.532  | 0.125 | 1.032 | 3.398 |
| CHN2    | 0.06   | 0.295 | 0.203  | 0.839 | 1.062 | 0.313 | 0.197  | 0.844 | 0.595 | 1.894 |
| CHN1    | -0.291 | 0.298 | -0.975 | 0.33  | 0.748 | 0.223 | -1.131 | 0.258 | 0.417 | 1.341 |
| CHMP7   | -0.353 | 0.304 | -1.16  | 0.246 | 0.703 | 0.214 | -1.391 | 0.164 | 0.388 | 1.275 |
| CHMP6   | 0.372  | 0.298 | 1.25   | 0.211 | 1.451 | 0.433 | 1.043  | 0.297 | 0.809 | 2.603 |
| CHMP5   | -0.071 | 0.297 | -0.238 | 0.812 | 0.932 | 0.277 | -0.247 | 0.805 | 0.52  | 1.668 |
| CHMP2B  | -0.367 | 0.303 | -1.21  | 0.226 | 0.693 | 0.21  | -1.461 | 0.144 | 0.382 | 1.256 |
| CHMP2A  | 0.32   | 0.298 | 1.074  | 0.283 | 1.377 | 0.41  | 0.919  | 0.358 | 0.768 | 2.467 |
| CHMP1B  | -0.243 | 0.298 | -0.816 | 0.415 | 0.784 | 0.233 | -0.923 | 0.356 | 0.438 | 1.406 |
| CHMP1A  | 0.509  | 0.3   | 1.698  | 0.089 | 1.663 | 0.498 | 1.331  | 0.183 | 0.925 | 2.992 |
| CHML    | 0.57   | 0.306 | 1.865  | 0.062 | 1.769 | 0.541 | 1.421  | 0.155 | 0.971 | 3.221 |

|        |        |       |        |       |       |       |        |       |       |       |
|--------|--------|-------|--------|-------|-------|-------|--------|-------|-------|-------|
| CHM    | -0.194 | 0.299 | -0.651 | 0.515 | 0.823 | 0.246 | -0.718 | 0.473 | 0.458 | 1.479 |
| CHL1   | -0.938 | 0.321 | -2.922 | 0.003 | 0.391 | 0.126 | -4.843 | 0     | 0.209 | 0.734 |
| CHKB   | -0.612 | 0.304 | -2.015 | 0.044 | 0.542 | 0.165 | -2.779 | 0.005 | 0.299 | 0.983 |
| CHKA   | -0.272 | 0.298 | -0.915 | 0.36  | 0.762 | 0.227 | -1.052 | 0.293 | 0.425 | 1.365 |
| CHIT1  | -0.423 | 0.3   | -1.41  | 0.159 | 0.655 | 0.197 | -1.755 | 0.079 | 0.364 | 1.18  |
| CHIC2  | 0.52   | 0.302 | 1.721  | 0.085 | 1.682 | 0.509 | 1.342  | 0.18  | 0.93  | 3.042 |
| CHIA   | -0.17  | 0.297 | -0.571 | 0.568 | 0.844 | 0.251 | -0.623 | 0.534 | 0.471 | 1.511 |
| CHI3L2 | -0.219 | 0.296 | -0.74  | 0.459 | 0.803 | 0.238 | -0.828 | 0.408 | 0.449 | 1.435 |
| CHI3L1 | 0.085  | 0.295 | 0.289  | 0.772 | 1.089 | 0.322 | 0.277  | 0.782 | 0.61  | 1.943 |
| CHGB   | -0.49  | 0.3   | -1.632 | 0.103 | 0.613 | 0.184 | -2.106 | 0.035 | 0.34  | 1.103 |
| CHGA   | 0.317  | 0.298 | 1.067  | 0.286 | 1.374 | 0.409 | 0.914  | 0.361 | 0.767 | 2.461 |
| CHFR   | 0.089  | 0.297 | 0.298  | 0.765 | 1.093 | 0.325 | 0.286  | 0.775 | 0.61  | 1.956 |
| CHERP  | -0.035 | 0.296 | -0.119 | 0.905 | 0.965 | 0.285 | -0.121 | 0.903 | 0.541 | 1.723 |
| CHEK2  | 0.143  | 0.297 | 0.481  | 0.631 | 1.153 | 0.342 | 0.448  | 0.654 | 0.645 | 2.063 |
| CHEK1  | 0.401  | 0.3   | 1.338  | 0.181 | 1.494 | 0.448 | 1.102  | 0.27  | 0.83  | 2.689 |
| CHD9   | -0.284 | 0.297 | -0.955 | 0.34  | 0.753 | 0.224 | -1.104 | 0.269 | 0.42  | 1.349 |
| CHD8   | -0.29  | 0.296 | -0.979 | 0.328 | 0.748 | 0.222 | -1.136 | 0.256 | 0.419 | 1.337 |
| CHD7   | 0.236  | 0.298 | 0.792  | 0.428 | 1.266 | 0.377 | 0.706  | 0.48  | 0.706 | 2.268 |
| CHD5   | 0.076  | 0.297 | 0.257  | 0.797 | 1.079 | 0.32  | 0.247  | 0.805 | 0.603 | 1.93  |
| CHD4   | -0.494 | 0.302 | -1.634 | 0.102 | 0.61  | 0.185 | -2.113 | 0.035 | 0.337 | 1.104 |
| CHD3   | -0.349 | 0.297 | -1.177 | 0.239 | 0.705 | 0.209 | -1.408 | 0.159 | 0.394 | 1.262 |
| CHD2   | -0.017 | 0.296 | -0.058 | 0.954 | 0.983 | 0.291 | -0.058 | 0.954 | 0.55  | 1.756 |
| CHD1L  | -0.253 | 0.297 | -0.851 | 0.395 | 0.777 | 0.231 | -0.968 | 0.333 | 0.434 | 1.391 |
| CHD1   | 0.406  | 0.299 | 1.358  | 0.175 | 1.5   | 0.448 | 1.116  | 0.264 | 0.835 | 2.695 |
| CHCHD7 | 0.031  | 0.295 | 0.105  | 0.917 | 1.031 | 0.304 | 0.103  | 0.918 | 0.578 | 1.839 |
| CHCHD3 | 0.334  | 0.298 | 1.122  | 0.262 | 1.397 | 0.416 | 0.954  | 0.34  | 0.779 | 2.503 |
| CHCHD2 | 0.934  | 0.315 | 2.963  | 0.003 | 2.545 | 0.802 | 1.926  | 0.054 | 1.372 | 4.72  |
| CHAT   | -0.621 | 0.306 | -2.029 | 0.042 | 0.537 | 0.164 | -2.813 | 0.005 | 0.295 | 0.979 |
| CHAF1B | 0.55   | 0.3   | 1.833  | 0.067 | 1.734 | 0.521 | 1.41   | 0.159 | 0.963 | 3.123 |
| CHAF1A | 0.997  | 0.321 | 3.107  | 0.002 | 2.709 | 0.869 | 1.967  | 0.049 | 1.445 | 5.079 |
| CHAD   | -0.234 | 0.299 | -0.784 | 0.433 | 0.791 | 0.236 | -0.883 | 0.377 | 0.441 | 1.421 |
| CHAC1  | 0.265  | 0.298 | 0.891  | 0.373 | 1.304 | 0.388 | 0.782  | 0.434 | 0.727 | 2.336 |
| CH25H  | -0.948 | 0.316 | -2.999 | 0.003 | 0.387 | 0.123 | -5     | 0     | 0.209 | 0.72  |
| CGRRF1 | 0.035  | 0.296 | 0.117  | 0.907 | 1.035 | 0.307 | 0.115  | 0.908 | 0.579 | 1.85  |
| CGREF1 | -0.335 | 0.3   | -1.117 | 0.264 | 0.715 | 0.215 | -1.328 | 0.184 | 0.397 | 1.288 |
| CGGBP1 | 0.781  | 0.31  | 2.521  | 0.012 | 2.184 | 0.677 | 1.749  | 0.08  | 1.19  | 4.009 |
| CGA    | 0.224  | 0.296 | 0.757  | 0.449 | 1.251 | 0.371 | 0.678  | 0.498 | 0.7   | 2.236 |
| CFTR   | -0.451 | 0.299 | -1.508 | 0.131 | 0.637 | 0.19  | -1.906 | 0.057 | 0.355 | 1.145 |

|         |        |       |        |       |       |       |        |       |       |       |
|---------|--------|-------|--------|-------|-------|-------|--------|-------|-------|-------|
| CFP     | -0.286 | 0.298 | -0.959 | 0.338 | 0.751 | 0.224 | -1.11  | 0.267 | 0.419 | 1.348 |
| CFLAR   | 0.236  | 0.295 | 0.8    | 0.424 | 1.266 | 0.374 | 0.712  | 0.476 | 0.71  | 2.26  |
| CFL1    | 0.431  | 0.3   | 1.437  | 0.151 | 1.538 | 0.461 | 1.168  | 0.243 | 0.855 | 2.769 |
| CFI     | -0.514 | 0.302 | -1.699 | 0.089 | 0.598 | 0.181 | -2.221 | 0.026 | 0.331 | 1.082 |
| CFHR5   | -0.607 | 0.31  | -1.96  | 0.05  | 0.545 | 0.169 | -2.696 | 0.007 | 0.297 | 1     |
| CFHR4   | 0.34   | 0.3   | 1.136  | 0.256 | 1.405 | 0.421 | 0.963  | 0.335 | 0.781 | 2.528 |
| CFHR2   | 0.481  | 0.3   | 1.601  | 0.109 | 1.617 | 0.486 | 1.271  | 0.204 | 0.898 | 2.914 |
| CFH     | -0.802 | 0.31  | -2.583 | 0.01  | 0.449 | 0.139 | -3.962 | 0     | 0.244 | 0.824 |
| CFDP1   | 0.993  | 0.317 | 3.135  | 0.002 | 2.699 | 0.855 | 1.987  | 0.047 | 1.451 | 5.022 |
| CFD     | -0.337 | 0.298 | -1.131 | 0.258 | 0.714 | 0.213 | -1.345 | 0.179 | 0.398 | 1.28  |
| CFB     | -0.181 | 0.296 | -0.611 | 0.541 | 0.835 | 0.247 | -0.67  | 0.503 | 0.467 | 1.491 |
| CFAP94  | -0.561 | 0.306 | -1.835 | 0.067 | 0.571 | 0.174 | -2.461 | 0.014 | 0.313 | 1.039 |
| CFAP74  | -0.471 | 0.302 | -1.562 | 0.118 | 0.624 | 0.188 | -1.995 | 0.046 | 0.346 | 1.127 |
| CFAP70  | -0.019 | 0.295 | -0.063 | 0.949 | 0.981 | 0.29  | -0.064 | 0.949 | 0.55  | 1.751 |
| CFAP69  | -0.63  | 0.31  | -2.03  | 0.042 | 0.533 | 0.165 | -2.828 | 0.005 | 0.29  | 0.978 |
| CFAP46  | 0.197  | 0.298 | 0.661  | 0.509 | 1.217 | 0.362 | 0.6    | 0.549 | 0.679 | 2.181 |
| CFAP45  | -0.676 | 0.31  | -2.182 | 0.029 | 0.509 | 0.158 | -3.117 | 0.002 | 0.277 | 0.934 |
| CFAP44  | -0.103 | 0.295 | -0.349 | 0.727 | 0.902 | 0.266 | -0.368 | 0.713 | 0.506 | 1.609 |
| CFAP43  | 0.014  | 0.296 | 0.047  | 0.963 | 1.014 | 0.3   | 0.047  | 0.963 | 0.568 | 1.81  |
| CFAP410 | 0.239  | 0.297 | 0.806  | 0.42  | 1.27  | 0.377 | 0.717  | 0.474 | 0.71  | 2.271 |
| CFAP298 | 0.228  | 0.299 | 0.762  | 0.446 | 1.256 | 0.375 | 0.681  | 0.496 | 0.699 | 2.255 |
| CFAP20  | 0.65   | 0.303 | 2.146  | 0.032 | 1.915 | 0.58  | 1.578  | 0.114 | 1.058 | 3.467 |
| CETP    | -0.398 | 0.298 | -1.333 | 0.182 | 0.672 | 0.2   | -1.637 | 0.102 | 0.375 | 1.205 |
| CETN3   | -0.023 | 0.296 | -0.078 | 0.938 | 0.977 | 0.289 | -0.079 | 0.937 | 0.548 | 1.744 |
| CETN2   | 0.35   | 0.298 | 1.175  | 0.24  | 1.419 | 0.423 | 0.991  | 0.322 | 0.791 | 2.546 |
| CETN1   | 0.123  | 0.297 | 0.415  | 0.678 | 1.131 | 0.336 | 0.39   | 0.696 | 0.632 | 2.026 |
| CES3    | 0.181  | 0.296 | 0.612  | 0.541 | 1.199 | 0.355 | 0.56   | 0.576 | 0.671 | 2.142 |
| CES2    | 0.643  | 0.31  | 2.076  | 0.038 | 1.903 | 0.589 | 1.531  | 0.126 | 1.037 | 3.492 |
| CES1P1  | 0.499  | 0.306 | 1.631  | 0.103 | 1.647 | 0.503 | 1.284  | 0.199 | 0.904 | 2.998 |
| CES1    | 0.024  | 0.295 | 0.081  | 0.936 | 1.024 | 0.302 | 0.08   | 0.936 | 0.574 | 1.827 |
| CERT1   | 0.018  | 0.295 | 0.061  | 0.951 | 1.018 | 0.301 | 0.061  | 0.952 | 0.571 | 1.816 |
| CERS6   | -0.398 | 0.302 | -1.317 | 0.188 | 0.672 | 0.203 | -1.618 | 0.106 | 0.371 | 1.214 |
| CERS4   | 0.042  | 0.295 | 0.142  | 0.887 | 1.043 | 0.308 | 0.14   | 0.889 | 0.585 | 1.86  |
| CERS2   | -0.004 | 0.298 | -0.013 | 0.99  | 0.996 | 0.296 | -0.013 | 0.99  | 0.556 | 1.785 |
| CERNA1  | -0.282 | 0.298 | -0.948 | 0.343 | 0.754 | 0.224 | -1.096 | 0.273 | 0.421 | 1.351 |
| CERK    | 0.458  | 0.302 | 1.513  | 0.13  | 1.58  | 0.478 | 1.214  | 0.225 | 0.874 | 2.859 |
| CER1    | -0.01  | 0.299 | -0.032 | 0.974 | 0.99  | 0.296 | -0.032 | 0.974 | 0.551 | 1.781 |
| CEPT1   | 0.994  | 0.322 | 3.091  | 0.002 | 2.702 | 0.869 | 1.959  | 0.05  | 1.439 | 5.075 |

|           |        |       |        |       |       |       |        |       |       |       |
|-----------|--------|-------|--------|-------|-------|-------|--------|-------|-------|-------|
| CEP97     | 0.636  | 0.306 | 2.078  | 0.038 | 1.888 | 0.578 | 1.538  | 0.124 | 1.037 | 3.439 |
| CEP85     | 0.025  | 0.295 | 0.084  | 0.933 | 1.025 | 0.303 | 0.083  | 0.934 | 0.574 | 1.829 |
| CEP83     | -0.179 | 0.296 | -0.605 | 0.545 | 0.836 | 0.248 | -0.662 | 0.508 | 0.468 | 1.494 |
| CEP76     | 0.191  | 0.3   | 0.635  | 0.525 | 1.21  | 0.363 | 0.578  | 0.563 | 0.672 | 2.178 |
| CEP72     | 0.042  | 0.296 | 0.144  | 0.886 | 1.043 | 0.309 | 0.141  | 0.888 | 0.584 | 1.864 |
| CEP70     | 0.731  | 0.306 | 2.386  | 0.017 | 2.077 | 0.636 | 1.693  | 0.091 | 1.139 | 3.787 |
| CEP68     | -0.043 | 0.295 | -0.146 | 0.884 | 0.958 | 0.283 | -0.149 | 0.881 | 0.537 | 1.708 |
| CEP63     | -0.044 | 0.296 | -0.149 | 0.882 | 0.957 | 0.283 | -0.152 | 0.879 | 0.536 | 1.708 |
| CEP57     | -0.034 | 0.295 | -0.117 | 0.907 | 0.966 | 0.285 | -0.119 | 0.906 | 0.542 | 1.723 |
| CEP55     | 0.66   | 0.306 | 2.16   | 0.031 | 1.935 | 0.591 | 1.581  | 0.114 | 1.063 | 3.523 |
| CEP43     | 0.001  | 0.296 | 0.002  | 0.998 | 1.001 | 0.296 | 0.002  | 0.998 | 0.56  | 1.788 |
| CEP41     | -0.061 | 0.296 | -0.206 | 0.837 | 0.941 | 0.278 | -0.212 | 0.832 | 0.527 | 1.68  |
| CEP350    | -0.049 | 0.295 | -0.166 | 0.868 | 0.952 | 0.281 | -0.17  | 0.865 | 0.534 | 1.699 |
| CEP295    | 0.327  | 0.298 | 1.098  | 0.272 | 1.386 | 0.413 | 0.937  | 0.349 | 0.774 | 2.484 |
| CEP290    | -0.538 | 0.307 | -1.756 | 0.079 | 0.584 | 0.179 | -2.326 | 0.02  | 0.32  | 1.065 |
| CEP250    | 0.409  | 0.3   | 1.365  | 0.172 | 1.505 | 0.451 | 1.121  | 0.262 | 0.837 | 2.708 |
| CEP192    | -0.043 | 0.295 | -0.147 | 0.883 | 0.958 | 0.283 | -0.15  | 0.881 | 0.537 | 1.709 |
| CEP170B   | 0.731  | 0.31  | 2.358  | 0.018 | 2.076 | 0.643 | 1.673  | 0.094 | 1.131 | 3.81  |
| CEP164    | 0.223  | 0.296 | 0.754  | 0.451 | 1.25  | 0.37  | 0.676  | 0.499 | 0.7   | 2.233 |
| CEP162    | 0.128  | 0.296 | 0.433  | 0.665 | 1.136 | 0.336 | 0.406  | 0.685 | 0.637 | 2.028 |
| CEP152    | 0.51   | 0.302 | 1.687  | 0.092 | 1.666 | 0.504 | 1.321  | 0.186 | 0.921 | 3.014 |
| CEP135    | -0.141 | 0.296 | -0.476 | 0.634 | 0.869 | 0.257 | -0.511 | 0.609 | 0.486 | 1.552 |
| CEP131    | 0.317  | 0.301 | 1.056  | 0.291 | 1.373 | 0.413 | 0.905  | 0.366 | 0.762 | 2.475 |
| CEP112    | -0.124 | 0.295 | -0.421 | 0.673 | 0.883 | 0.261 | -0.449 | 0.654 | 0.495 | 1.575 |
| CEP104    | 0.726  | 0.305 | 2.378  | 0.017 | 2.067 | 0.631 | 1.691  | 0.091 | 1.136 | 3.759 |
| CENPX     | 0.404  | 0.299 | 1.353  | 0.176 | 1.498 | 0.447 | 1.113  | 0.266 | 0.834 | 2.689 |
| CENPU     | 0.806  | 0.31  | 2.601  | 0.009 | 2.238 | 0.693 | 1.786  | 0.074 | 1.22  | 4.108 |
| CENPT     | -0.277 | 0.298 | -0.929 | 0.353 | 0.758 | 0.226 | -1.07  | 0.284 | 0.423 | 1.359 |
| CENPO     | 0.624  | 0.302 | 2.062  | 0.039 | 1.865 | 0.564 | 1.535  | 0.125 | 1.031 | 3.374 |
| CENPO     | 0.291  | 0.297 | 0.983  | 0.326 | 1.338 | 0.397 | 0.852  | 0.394 | 0.748 | 2.393 |
| CENPN     | 0.501  | 0.3   | 1.672  | 0.095 | 1.65  | 0.495 | 1.315  | 0.188 | 0.917 | 2.969 |
| CENPM     | 0.713  | 0.306 | 2.332  | 0.02  | 2.04  | 0.624 | 1.668  | 0.095 | 1.121 | 3.714 |
| CENPJ     | 0.799  | 0.315 | 2.537  | 0.011 | 2.223 | 0.7   | 1.747  | 0.081 | 1.199 | 4.12  |
| CENPI     | 0.47   | 0.303 | 1.554  | 0.12  | 1.601 | 0.485 | 1.239  | 0.215 | 0.884 | 2.897 |
| CENPF     | 0.497  | 0.307 | 1.619  | 0.106 | 1.644 | 0.505 | 1.275  | 0.202 | 0.9   | 3.001 |
| CENPE     | 0.819  | 0.31  | 2.645  | 0.008 | 2.269 | 0.703 | 1.805  | 0.071 | 1.236 | 4.164 |
| CENPC     | 0.542  | 0.302 | 1.792  | 0.073 | 1.719 | 0.52  | 1.384  | 0.166 | 0.951 | 3.109 |
| CENPBD1P1 | 0.216  | 0.296 | 0.728  | 0.467 | 1.241 | 0.367 | 0.655  | 0.513 | 0.694 | 2.216 |

|          |        |       |        |       |       |       |        |       |       |       |
|----------|--------|-------|--------|-------|-------|-------|--------|-------|-------|-------|
| CENPB    | -0.023 | 0.296 | -0.077 | 0.939 | 0.978 | 0.289 | -0.078 | 0.938 | 0.548 | 1.745 |
| CENPA    | 0.614  | 0.311 | 1.975  | 0.048 | 1.848 | 0.575 | 1.476  | 0.14  | 1.005 | 3.399 |
| CEND1    | 0.708  | 0.31  | 2.282  | 0.023 | 2.029 | 0.629 | 1.635  | 0.102 | 1.105 | 3.727 |
| CEMP1    | 0.623  | 0.304 | 2.047  | 0.041 | 1.865 | 0.567 | 1.524  | 0.128 | 1.027 | 3.386 |
| CEMIP2   | -0.231 | 0.296 | -0.78  | 0.436 | 0.794 | 0.235 | -0.877 | 0.38  | 0.444 | 1.418 |
| CEMIP    | 0.138  | 0.296 | 0.468  | 0.64  | 1.148 | 0.34  | 0.437  | 0.662 | 0.643 | 2.051 |
| CELSR3   | 0.141  | 0.295 | 0.479  | 0.632 | 1.152 | 0.34  | 0.447  | 0.655 | 0.646 | 2.055 |
| CELSR2   | -0.284 | 0.3   | -0.946 | 0.344 | 0.753 | 0.226 | -1.094 | 0.274 | 0.418 | 1.355 |
| CELSR1   | -0.225 | 0.301 | -0.748 | 0.454 | 0.799 | 0.24  | -0.839 | 0.401 | 0.443 | 1.44  |
| CELP     | 0.029  | 0.296 | 0.097  | 0.923 | 1.029 | 0.304 | 0.095  | 0.924 | 0.576 | 1.837 |
| CELF3    | 0.177  | 0.296 | 0.599  | 0.549 | 1.194 | 0.353 | 0.549  | 0.583 | 0.669 | 2.131 |
| CELF2    | -0.718 | 0.304 | -2.361 | 0.018 | 0.488 | 0.148 | -3.454 | 0.001 | 0.269 | 0.885 |
| CELF1    | -0.072 | 0.296 | -0.243 | 0.808 | 0.931 | 0.275 | -0.252 | 0.801 | 0.521 | 1.662 |
| CELA3B   | 0.867  | 0.316 | 2.743  | 0.006 | 2.379 | 0.751 | 1.835  | 0.067 | 1.281 | 4.418 |
| CELA3A   | 0.159  | 0.298 | 0.533  | 0.594 | 1.172 | 0.349 | 0.493  | 0.622 | 0.654 | 2.1   |
| CELA2B   | -0.222 | 0.296 | -0.75  | 0.453 | 0.801 | 0.237 | -0.84  | 0.401 | 0.448 | 1.431 |
| CEL      | 0.157  | 0.295 | 0.53   | 0.596 | 1.169 | 0.346 | 0.49   | 0.624 | 0.655 | 2.087 |
| CEBPZ    | 0.57   | 0.303 | 1.881  | 0.06  | 1.769 | 0.536 | 1.433  | 0.152 | 0.976 | 3.204 |
| CEBPG    | 0.942  | 0.317 | 2.97   | 0.003 | 2.564 | 0.813 | 1.924  | 0.054 | 1.378 | 4.772 |
| CEBPE    | -0.048 | 0.295 | -0.163 | 0.871 | 0.953 | 0.282 | -0.167 | 0.868 | 0.534 | 1.7   |
| CEBPD    | -0.014 | 0.296 | -0.049 | 0.961 | 0.986 | 0.291 | -0.049 | 0.961 | 0.552 | 1.76  |
| CEBPB    | 0.385  | 0.3   | 1.284  | 0.199 | 1.47  | 0.441 | 1.066  | 0.287 | 0.817 | 2.645 |
| CEBPA-DT | 1.05   | 0.328 | 3.205  | 0.001 | 2.858 | 0.936 | 1.984  | 0.047 | 1.504 | 5.432 |
| CEBPA    | -0.247 | 0.297 | -0.833 | 0.405 | 0.781 | 0.232 | -0.945 | 0.345 | 0.437 | 1.397 |
| CEACAM8  | 0.039  | 0.295 | 0.132  | 0.895 | 1.04  | 0.307 | 0.13   | 0.897 | 0.583 | 1.854 |
| CEACAM7  | 0.401  | 0.3   | 1.337  | 0.181 | 1.493 | 0.448 | 1.101  | 0.271 | 0.829 | 2.687 |
| CEACAM6  | -0.364 | 0.298 | -1.22  | 0.222 | 0.695 | 0.207 | -1.471 | 0.141 | 0.388 | 1.247 |
| CEACAM5  | 0.301  | 0.298 | 1.011  | 0.312 | 1.351 | 0.402 | 0.873  | 0.383 | 0.754 | 2.42  |
| CEACAM4  | 0.326  | 0.298 | 1.095  | 0.274 | 1.386 | 0.413 | 0.934  | 0.35  | 0.773 | 2.484 |
| CEACAM3  | -0.069 | 0.295 | -0.232 | 0.816 | 0.934 | 0.276 | -0.24  | 0.81  | 0.523 | 1.666 |
| CEACAM21 | 0.271  | 0.298 | 0.91   | 0.363 | 1.311 | 0.39  | 0.797  | 0.425 | 0.732 | 2.35  |
| CEACAM1  | -0.027 | 0.295 | -0.093 | 0.926 | 0.973 | 0.287 | -0.094 | 0.925 | 0.545 | 1.736 |
| CDYL     | -0.163 | 0.298 | -0.546 | 0.585 | 0.85  | 0.253 | -0.593 | 0.553 | 0.473 | 1.525 |
| CDY1     | 0.046  | 0.295 | 0.155  | 0.877 | 1.047 | 0.309 | 0.152  | 0.879 | 0.587 | 1.867 |
| CDX4     | 0.008  | 0.295 | 0.026  | 0.98  | 1.008 | 0.297 | 0.026  | 0.98  | 0.565 | 1.797 |
| CDX2     | 0.522  | 0.303 | 1.722  | 0.085 | 1.685 | 0.511 | 1.342  | 0.18  | 0.931 | 3.052 |
| CDX1     | -0.428 | 0.302 | -1.415 | 0.157 | 0.652 | 0.197 | -1.766 | 0.077 | 0.36  | 1.179 |
| CDV3     | 0.175  | 0.296 | 0.59   | 0.555 | 1.191 | 0.353 | 0.541  | 0.589 | 0.666 | 2.129 |

|           |        |       |        |       |       |       |        |       |       |       |
|-----------|--------|-------|--------|-------|-------|-------|--------|-------|-------|-------|
| CDT1      | 0.606  | 0.306 | 1.982  | 0.048 | 1.833 | 0.56  | 1.486  | 0.137 | 1.007 | 3.337 |
| CDSN      | 0.218  | 0.296 | 0.735  | 0.462 | 1.243 | 0.368 | 0.66   | 0.509 | 0.696 | 2.221 |
| CDS2      | 0.291  | 0.297 | 0.98   | 0.327 | 1.338 | 0.397 | 0.851  | 0.395 | 0.748 | 2.393 |
| CDS1      | 0.387  | 0.298 | 1.299  | 0.194 | 1.472 | 0.438 | 1.077  | 0.281 | 0.821 | 2.639 |
| CDRT1     | 0.29   | 0.298 | 0.975  | 0.33  | 1.337 | 0.398 | 0.846  | 0.398 | 0.746 | 2.397 |
| CDR2L     | 0.158  | 0.295 | 0.536  | 0.592 | 1.171 | 0.346 | 0.495  | 0.62  | 0.657 | 2.09  |
| CDR1      | -0.163 | 0.296 | -0.55  | 0.582 | 0.85  | 0.252 | -0.598 | 0.55  | 0.475 | 1.518 |
| CDON      | -0.581 | 0.31  | -1.874 | 0.061 | 0.559 | 0.173 | -2.541 | 0.011 | 0.305 | 1.027 |
| CDO1      | -0.418 | 0.3   | -1.394 | 0.163 | 0.659 | 0.197 | -1.73  | 0.084 | 0.366 | 1.185 |
| CDKN3     | 0.339  | 0.298 | 1.138  | 0.255 | 1.403 | 0.418 | 0.965  | 0.335 | 0.783 | 2.515 |
| CDKN2D    | 0.075  | 0.296 | 0.255  | 0.799 | 1.078 | 0.319 | 0.246  | 0.806 | 0.604 | 1.927 |
| CDKN2C    | 0.313  | 0.298 | 1.05   | 0.294 | 1.367 | 0.408 | 0.901  | 0.367 | 0.762 | 2.452 |
| CDKN2B    | -0.424 | 0.3   | -1.412 | 0.158 | 0.655 | 0.196 | -1.758 | 0.079 | 0.363 | 1.179 |
| CDKN2AIP  | -0.164 | 0.302 | -0.543 | 0.587 | 0.849 | 0.256 | -0.59  | 0.555 | 0.469 | 1.534 |
| CDKN2A-DT | 0.319  | 0.298 | 1.071  | 0.284 | 1.376 | 0.41  | 0.917  | 0.359 | 0.767 | 2.466 |
| CDKN2A    | -0.016 | 0.295 | -0.054 | 0.957 | 0.984 | 0.29  | -0.054 | 0.957 | 0.552 | 1.755 |
| CDKN1C    | -0.557 | 0.302 | -1.843 | 0.065 | 0.573 | 0.173 | -2.467 | 0.014 | 0.317 | 1.036 |
| CDKN1B    | -0.553 | 0.306 | -1.809 | 0.07  | 0.575 | 0.176 | -2.415 | 0.016 | 0.316 | 1.047 |
| CDKN1A    | 0.445  | 0.3   | 1.485  | 0.138 | 1.56  | 0.467 | 1.198  | 0.231 | 0.867 | 2.807 |
| CDKL5     | 0.122  | 0.296 | 0.413  | 0.679 | 1.13  | 0.334 | 0.389  | 0.697 | 0.633 | 2.017 |
| CDKL3     | -0.12  | 0.297 | -0.403 | 0.687 | 0.887 | 0.263 | -0.429 | 0.668 | 0.496 | 1.587 |
| CDKL2     | -0.353 | 0.299 | -1.183 | 0.237 | 0.702 | 0.21  | -1.419 | 0.156 | 0.391 | 1.261 |
| CDKL1     | -0.142 | 0.295 | -0.48  | 0.631 | 0.868 | 0.256 | -0.516 | 0.606 | 0.486 | 1.548 |
| CDKAL1    | 0.394  | 0.299 | 1.318  | 0.188 | 1.483 | 0.443 | 1.089  | 0.276 | 0.825 | 2.665 |
| CDK9      | -0.136 | 0.296 | -0.459 | 0.647 | 0.873 | 0.259 | -0.491 | 0.623 | 0.488 | 1.561 |
| CDK8      | 0.471  | 0.302 | 1.56   | 0.119 | 1.602 | 0.484 | 1.244  | 0.214 | 0.886 | 2.898 |
| CDK7      | -0.009 | 0.299 | -0.03  | 0.976 | 0.991 | 0.296 | -0.031 | 0.976 | 0.552 | 1.78  |
| CDK6      | 0.068  | 0.297 | 0.23   | 0.818 | 1.071 | 0.318 | 0.222  | 0.824 | 0.598 | 1.915 |
| CDK5RAP3  | -0.247 | 0.296 | -0.834 | 0.405 | 0.781 | 0.231 | -0.945 | 0.344 | 0.437 | 1.396 |
| CDK5RAP2  | 0.043  | 0.297 | 0.145  | 0.885 | 1.044 | 0.31  | 0.142  | 0.887 | 0.583 | 1.869 |
| CDK5RAP1  | 0.21   | 0.296 | 0.709  | 0.478 | 1.234 | 0.365 | 0.639  | 0.523 | 0.69  | 2.204 |
| CDK5R2    | 0.674  | 0.306 | 2.204  | 0.028 | 1.961 | 0.6   | 1.603  | 0.109 | 1.077 | 3.571 |
| CDK5R1    | 0.369  | 0.298 | 1.239  | 0.215 | 1.446 | 0.431 | 1.036  | 0.3   | 0.807 | 2.593 |
| CDK5      | -0.071 | 0.3   | -0.237 | 0.813 | 0.931 | 0.279 | -0.246 | 0.806 | 0.517 | 1.676 |
| CDK4      | 0.002  | 0.295 | 0.005  | 0.996 | 1.002 | 0.295 | 0.005  | 0.996 | 0.562 | 1.786 |
| CDK2AP2   | 0.242  | 0.296 | 0.817  | 0.414 | 1.274 | 0.378 | 0.726  | 0.468 | 0.713 | 2.277 |
| CDK2AP1   | 0.386  | 0.3   | 1.288  | 0.198 | 1.471 | 0.441 | 1.069  | 0.285 | 0.818 | 2.646 |
| CDK20     | -0.169 | 0.296 | -0.569 | 0.569 | 0.845 | 0.25  | -0.62  | 0.535 | 0.472 | 1.51  |



|       |        |       |        |       |       |       |        |       |       |       |
|-------|--------|-------|--------|-------|-------|-------|--------|-------|-------|-------|
| CDK2  | 0.441  | 0.308 | 1.434  | 0.152 | 1.555 | 0.479 | 1.159  | 0.246 | 0.85  | 2.842 |
| CDK19 | 0.182  | 0.296 | 0.614  | 0.539 | 1.199 | 0.355 | 0.561  | 0.575 | 0.671 | 2.143 |
| CDK18 | 0.157  | 0.295 | 0.532  | 0.595 | 1.17  | 0.346 | 0.492  | 0.622 | 0.656 | 2.088 |
| CDK17 | -0.285 | 0.3   | -0.949 | 0.343 | 0.752 | 0.226 | -1.098 | 0.272 | 0.418 | 1.354 |
| CDK16 | -0.046 | 0.295 | -0.157 | 0.875 | 0.955 | 0.282 | -0.161 | 0.872 | 0.535 | 1.703 |
| CDK14 | -0.613 | 0.304 | -2.015 | 0.044 | 0.542 | 0.165 | -2.78  | 0.005 | 0.299 | 0.983 |
| CDK13 | 0.264  | 0.298 | 0.888  | 0.375 | 1.302 | 0.388 | 0.78   | 0.435 | 0.727 | 2.334 |
| CDK12 | 0.142  | 0.297 | 0.479  | 0.632 | 1.153 | 0.342 | 0.446  | 0.655 | 0.644 | 2.061 |
| CDK10 | -0.928 | 0.318 | -2.914 | 0.004 | 0.395 | 0.126 | -4.802 | 0     | 0.212 | 0.738 |
| CDK1  | 0.535  | 0.302 | 1.771  | 0.077 | 1.708 | 0.516 | 1.371  | 0.17  | 0.944 | 3.089 |
| CDIPT | 0.239  | 0.297 | 0.804  | 0.421 | 1.27  | 0.377 | 0.715  | 0.475 | 0.709 | 2.274 |
| CDIP1 | 0.218  | 0.297 | 0.733  | 0.463 | 1.243 | 0.369 | 0.659  | 0.51  | 0.695 | 2.224 |
| CDHR5 | 0.442  | 0.3   | 1.475  | 0.14  | 1.556 | 0.466 | 1.192  | 0.233 | 0.865 | 2.8   |
| CDHR2 | 0.137  | 0.297 | 0.461  | 0.645 | 1.147 | 0.341 | 0.431  | 0.667 | 0.641 | 2.053 |
| CDHR1 | 0.443  | 0.3   | 1.477  | 0.14  | 1.557 | 0.467 | 1.193  | 0.233 | 0.865 | 2.802 |
| CDH9  | -0.284 | 0.298 | -0.954 | 0.34  | 0.753 | 0.224 | -1.103 | 0.27  | 0.42  | 1.349 |
| CDH8  | 0.4    | 0.3   | 1.335  | 0.182 | 1.492 | 0.447 | 1.1    | 0.271 | 0.829 | 2.683 |
| CDH7  | -0.342 | 0.3   | -1.142 | 0.254 | 0.71  | 0.213 | -1.362 | 0.173 | 0.395 | 1.278 |
| CDH6  | -0.093 | 0.297 | -0.315 | 0.753 | 0.911 | 0.27  | -0.33  | 0.741 | 0.509 | 1.629 |
| CDH5  | -0.912 | 0.321 | -2.843 | 0.004 | 0.402 | 0.129 | -4.642 | 0     | 0.214 | 0.753 |
| CDH4  | 0.553  | 0.306 | 1.808  | 0.071 | 1.738 | 0.532 | 1.389  | 0.165 | 0.954 | 3.166 |
| CDH3  | 0.045  | 0.295 | 0.151  | 0.88  | 1.046 | 0.309 | 0.148  | 0.882 | 0.586 | 1.865 |
| CDH22 | -0.039 | 0.295 | -0.131 | 0.896 | 0.962 | 0.284 | -0.134 | 0.894 | 0.54  | 1.715 |
| CDH20 | 0.041  | 0.295 | 0.141  | 0.888 | 1.042 | 0.307 | 0.138  | 0.89  | 0.585 | 1.858 |
| CDH2  | -0.006 | 0.295 | -0.019 | 0.985 | 0.994 | 0.294 | -0.019 | 0.985 | 0.558 | 1.774 |
| CDH19 | -0.239 | 0.297 | -0.805 | 0.421 | 0.788 | 0.234 | -0.91  | 0.363 | 0.44  | 1.408 |
| CDH18 | -0.09  | 0.295 | -0.304 | 0.761 | 0.914 | 0.27  | -0.318 | 0.751 | 0.512 | 1.631 |
| CDH17 | -0.256 | 0.296 | -0.864 | 0.388 | 0.774 | 0.229 | -0.984 | 0.325 | 0.433 | 1.384 |
| CDH16 | 0.024  | 0.296 | 0.08   | 0.936 | 1.024 | 0.303 | 0.079  | 0.937 | 0.573 | 1.829 |
| CDH15 | -0.189 | 0.297 | -0.638 | 0.523 | 0.827 | 0.246 | -0.702 | 0.482 | 0.463 | 1.48  |
| CDH13 | -0.537 | 0.306 | -1.756 | 0.079 | 0.585 | 0.179 | -2.324 | 0.02  | 0.321 | 1.064 |
| CDH12 | 0.216  | 0.296 | 0.73   | 0.465 | 1.241 | 0.367 | 0.657  | 0.511 | 0.695 | 2.217 |
| CDH11 | -0.494 | 0.3   | -1.648 | 0.099 | 0.61  | 0.183 | -2.131 | 0.033 | 0.339 | 1.098 |
| CDH10 | 0.478  | 0.302 | 1.582  | 0.114 | 1.613 | 0.487 | 1.258  | 0.209 | 0.892 | 2.916 |
| CDH1  | 0.334  | 0.298 | 1.122  | 0.262 | 1.396 | 0.416 | 0.954  | 0.34  | 0.779 | 2.502 |
| CDCP1 | 0.353  | 0.298 | 1.183  | 0.237 | 1.423 | 0.424 | 0.997  | 0.319 | 0.793 | 2.551 |
| CDCA8 | 0.46   | 0.3   | 1.534  | 0.125 | 1.584 | 0.474 | 1.23   | 0.219 | 0.88  | 2.849 |
| CDCA4 | 0.531  | 0.302 | 1.755  | 0.079 | 1.701 | 0.514 | 1.362  | 0.173 | 0.94  | 3.077 |

|          |        |       |        |       |       |       |        |       |       |       |
|----------|--------|-------|--------|-------|-------|-------|--------|-------|-------|-------|
| CDCA3    | 1.006  | 0.321 | 3.135  | 0.002 | 2.734 | 0.877 | 1.977  | 0.048 | 1.458 | 5.129 |
| CDC73    | 0.542  | 0.302 | 1.792  | 0.073 | 1.72  | 0.52  | 1.383  | 0.167 | 0.95  | 3.111 |
| CDC7     | 0.302  | 0.299 | 1.012  | 0.312 | 1.353 | 0.404 | 0.873  | 0.383 | 0.753 | 2.43  |
| CDC6     | 0.852  | 0.315 | 2.707  | 0.007 | 2.345 | 0.738 | 1.822  | 0.068 | 1.265 | 4.347 |
| CDC5L    | 0.41   | 0.298 | 1.377  | 0.168 | 1.507 | 0.448 | 1.13   | 0.259 | 0.841 | 2.7   |
| CDC45    | 0.535  | 0.302 | 1.769  | 0.077 | 1.707 | 0.516 | 1.37   | 0.171 | 0.944 | 3.088 |
| CDC42SE1 | -0.475 | 0.299 | -1.591 | 0.112 | 0.622 | 0.186 | -2.036 | 0.042 | 0.346 | 1.117 |
| CDC42EP4 | 0.144  | 0.295 | 0.489  | 0.625 | 1.155 | 0.341 | 0.455  | 0.649 | 0.648 | 2.061 |
| CDC42EP3 | -0.331 | 0.298 | -1.111 | 0.267 | 0.719 | 0.214 | -1.316 | 0.188 | 0.401 | 1.288 |
| CDC42EP2 | 0.153  | 0.296 | 0.519  | 0.604 | 1.166 | 0.345 | 0.481  | 0.631 | 0.653 | 2.081 |
| CDC42EP1 | -0.226 | 0.296 | -0.763 | 0.446 | 0.798 | 0.236 | -0.856 | 0.392 | 0.446 | 1.426 |
| CDC42BPB | -0.069 | 0.295 | -0.235 | 0.815 | 0.933 | 0.276 | -0.243 | 0.808 | 0.523 | 1.664 |
| CDC42BPA | -0.207 | 0.297 | -0.697 | 0.486 | 0.813 | 0.242 | -0.775 | 0.439 | 0.454 | 1.456 |
| CDC42    | -0.103 | 0.297 | -0.345 | 0.73  | 0.903 | 0.268 | -0.364 | 0.716 | 0.504 | 1.615 |
| CDC40    | 0.048  | 0.295 | 0.162  | 0.871 | 1.049 | 0.31  | 0.159  | 0.874 | 0.588 | 1.872 |
| CDC37L1  | -0.781 | 0.315 | -2.481 | 0.013 | 0.458 | 0.144 | -3.759 | 0     | 0.247 | 0.849 |
| CDC37    | -0.32  | 0.298 | -1.073 | 0.283 | 0.726 | 0.216 | -1.265 | 0.206 | 0.405 | 1.302 |
| CDC34    | 0.719  | 0.305 | 2.358  | 0.018 | 2.052 | 0.626 | 1.681  | 0.093 | 1.129 | 3.732 |
| CDC27    | 0.378  | 0.298 | 1.27   | 0.204 | 1.46  | 0.435 | 1.057  | 0.29  | 0.814 | 2.616 |
| CDC25C   | 0.838  | 0.308 | 2.719  | 0.007 | 2.312 | 0.713 | 1.841  | 0.066 | 1.264 | 4.231 |
| CDC25B   | 0.349  | 0.3   | 1.165  | 0.244 | 1.418 | 0.425 | 0.983  | 0.326 | 0.788 | 2.554 |
| CDC25A   | 0.002  | 0.295 | 0.007  | 0.994 | 1.002 | 0.296 | 0.007  | 0.994 | 0.562 | 1.787 |
| CDC23    | 0.118  | 0.295 | 0.401  | 0.689 | 1.126 | 0.333 | 0.378  | 0.706 | 0.631 | 2.009 |
| CDC20    | 0.699  | 0.31  | 2.254  | 0.024 | 2.011 | 0.624 | 1.622  | 0.105 | 1.095 | 3.693 |
| CDC16    | 0.129  | 0.296 | 0.435  | 0.663 | 1.137 | 0.336 | 0.408  | 0.683 | 0.637 | 2.03  |
| CDC14B   | -0.147 | 0.295 | -0.499 | 0.618 | 0.863 | 0.255 | -0.537 | 0.591 | 0.484 | 1.54  |
| CDC14A   | -0.34  | 0.303 | -1.123 | 0.261 | 0.712 | 0.216 | -1.338 | 0.181 | 0.393 | 1.288 |
| CDC123   | 0.192  | 0.296 | 0.649  | 0.516 | 1.212 | 0.359 | 0.59   | 0.555 | 0.678 | 2.165 |
| CDADC1   | 0.082  | 0.295 | 0.278  | 0.781 | 1.085 | 0.321 | 0.267  | 0.79  | 0.608 | 1.937 |
| CDA      | -0.106 | 0.298 | -0.356 | 0.722 | 0.899 | 0.268 | -0.375 | 0.707 | 0.501 | 1.614 |
| CD99     | -0.37  | 0.298 | -1.244 | 0.214 | 0.691 | 0.206 | -1.505 | 0.132 | 0.385 | 1.238 |
| CD96     | -0.08  | 0.295 | -0.27  | 0.788 | 0.924 | 0.273 | -0.281 | 0.779 | 0.518 | 1.647 |
| CD93     | -0.374 | 0.298 | -1.256 | 0.209 | 0.688 | 0.205 | -1.523 | 0.128 | 0.384 | 1.233 |
| CD9      | 0.314  | 0.297 | 1.055  | 0.292 | 1.368 | 0.407 | 0.905  | 0.365 | 0.764 | 2.45  |
| CD8B     | -0.41  | 0.298 | -1.374 | 0.17  | 0.664 | 0.198 | -1.698 | 0.09  | 0.37  | 1.191 |
| CD8A     | -0.162 | 0.296 | -0.546 | 0.585 | 0.851 | 0.252 | -0.592 | 0.554 | 0.476 | 1.521 |
| CD86     | 0.141  | 0.295 | 0.476  | 0.634 | 1.151 | 0.34  | 0.444  | 0.657 | 0.645 | 2.054 |
| CD84     | 0.318  | 0.298 | 1.069  | 0.285 | 1.375 | 0.41  | 0.915  | 0.36  | 0.767 | 2.466 |

|        |        |       |        |       |       |       |        |       |       |       |
|--------|--------|-------|--------|-------|-------|-------|--------|-------|-------|-------|
| CD83   | 0.165  | 0.296 | 0.556  | 0.578 | 1.179 | 0.35  | 0.513  | 0.608 | 0.66  | 2.109 |
| CD82   | 0.049  | 0.295 | 0.165  | 0.869 | 1.05  | 0.31  | 0.161  | 0.872 | 0.588 | 1.873 |
| CD81   | 0.177  | 0.296 | 0.598  | 0.55  | 1.194 | 0.354 | 0.548  | 0.584 | 0.668 | 2.133 |
| CD80   | 0.053  | 0.296 | 0.178  | 0.859 | 1.054 | 0.312 | 0.173  | 0.863 | 0.59  | 1.882 |
| CD79B  | 0.107  | 0.297 | 0.36   | 0.719 | 1.113 | 0.33  | 0.341  | 0.733 | 0.622 | 1.99  |
| CD79A  | -0.29  | 0.297 | -0.977 | 0.328 | 0.748 | 0.222 | -1.134 | 0.257 | 0.418 | 1.339 |
| CD74   | -0.594 | 0.306 | -1.94  | 0.052 | 0.552 | 0.169 | -2.65  | 0.008 | 0.303 | 1.006 |
| CD72   | -0.049 | 0.296 | -0.166 | 0.868 | 0.952 | 0.281 | -0.17  | 0.865 | 0.533 | 1.699 |
| CD70   | 0.269  | 0.296 | 0.906  | 0.365 | 1.308 | 0.388 | 0.795  | 0.427 | 0.732 | 2.339 |
| CD7    | -0.085 | 0.297 | -0.287 | 0.774 | 0.918 | 0.273 | -0.3   | 0.765 | 0.513 | 1.643 |
| CD69   | -0.671 | 0.306 | -2.19  | 0.029 | 0.511 | 0.157 | -3.121 | 0.002 | 0.281 | 0.932 |
| CD63   | -0.421 | 0.3   | -1.406 | 0.16  | 0.656 | 0.197 | -1.749 | 0.08  | 0.365 | 1.181 |
| CD6    | 0.006  | 0.296 | 0.02   | 0.984 | 1.006 | 0.298 | 0.02   | 0.984 | 0.563 | 1.796 |
| CD5L   | 0.414  | 0.303 | 1.368  | 0.171 | 1.513 | 0.458 | 1.12   | 0.263 | 0.836 | 2.739 |
| CD59   | -0.25  | 0.298 | -0.841 | 0.4   | 0.779 | 0.232 | -0.956 | 0.339 | 0.435 | 1.395 |
| CD58   | -0.147 | 0.296 | -0.498 | 0.619 | 0.863 | 0.255 | -0.536 | 0.592 | 0.483 | 1.541 |
| CD55   | -0.304 | 0.3   | -1.015 | 0.31  | 0.738 | 0.221 | -1.187 | 0.235 | 0.41  | 1.327 |
| CD53   | -0.5   | 0.303 | -1.651 | 0.099 | 0.606 | 0.184 | -2.143 | 0.032 | 0.335 | 1.098 |
| CD52   | -0.365 | 0.298 | -1.227 | 0.22  | 0.694 | 0.207 | -1.481 | 0.139 | 0.387 | 1.244 |
| CD5    | -0.131 | 0.296 | -0.444 | 0.657 | 0.877 | 0.259 | -0.474 | 0.635 | 0.491 | 1.566 |
| CD48   | -0.463 | 0.3   | -1.54  | 0.124 | 0.63  | 0.189 | -1.958 | 0.05  | 0.349 | 1.135 |
| CD47   | 0.156  | 0.296 | 0.525  | 0.599 | 1.168 | 0.346 | 0.486  | 0.627 | 0.654 | 2.089 |
| CD46   | 0.094  | 0.295 | 0.32   | 0.749 | 1.099 | 0.325 | 0.305  | 0.76  | 0.616 | 1.961 |
| CD44   | -0.846 | 0.315 | -2.685 | 0.007 | 0.429 | 0.135 | -4.222 | 0     | 0.231 | 0.796 |
| CD40LG | -0.04  | 0.295 | -0.135 | 0.893 | 0.961 | 0.284 | -0.138 | 0.891 | 0.539 | 1.714 |
| CD40   | -0.245 | 0.299 | -0.819 | 0.413 | 0.783 | 0.234 | -0.928 | 0.354 | 0.435 | 1.407 |
| CD4    | -0.554 | 0.302 | -1.834 | 0.067 | 0.575 | 0.174 | -2.449 | 0.014 | 0.318 | 1.039 |
| CD3G   | -0.153 | 0.296 | -0.517 | 0.605 | 0.858 | 0.254 | -0.559 | 0.576 | 0.481 | 1.532 |
| CD3E   | -0.296 | 0.298 | -0.991 | 0.322 | 0.744 | 0.222 | -1.153 | 0.249 | 0.415 | 1.335 |
| CD3D   | -0.267 | 0.297 | -0.902 | 0.367 | 0.765 | 0.227 | -1.034 | 0.301 | 0.428 | 1.369 |
| CD38   | -0.005 | 0.296 | -0.018 | 0.985 | 0.995 | 0.295 | -0.018 | 0.985 | 0.556 | 1.778 |
| CD37   | -1.019 | 0.328 | -3.105 | 0.002 | 0.361 | 0.118 | -5.394 | 0     | 0.19  | 0.687 |
| CD36   | 0.351  | 0.3   | 1.171  | 0.242 | 1.42  | 0.426 | 0.987  | 0.323 | 0.789 | 2.555 |
| CD34   | -0.338 | 0.297 | -1.136 | 0.256 | 0.713 | 0.212 | -1.351 | 0.177 | 0.398 | 1.278 |
| CD33   | 0.432  | 0.3   | 1.441  | 0.15  | 1.54  | 0.461 | 1.17   | 0.242 | 0.856 | 2.77  |
| CD320  | 0.144  | 0.295 | 0.487  | 0.626 | 1.155 | 0.341 | 0.454  | 0.65  | 0.647 | 2.06  |
| CD300C | -0.301 | 0.298 | -1.01  | 0.313 | 0.74  | 0.221 | -1.178 | 0.239 | 0.412 | 1.328 |
| CD300A | 0.098  | 0.296 | 0.331  | 0.741 | 1.103 | 0.326 | 0.315  | 0.753 | 0.618 | 1.969 |

|        |        |       |        |       |       |       |        |       |       |       |
|--------|--------|-------|--------|-------|-------|-------|--------|-------|-------|-------|
| CD2BP2 | -0.218 | 0.298 | -0.732 | 0.464 | 0.804 | 0.239 | -0.818 | 0.413 | 0.449 | 1.441 |
| CD2AP  | -0.025 | 0.296 | -0.085 | 0.932 | 0.975 | 0.288 | -0.086 | 0.931 | 0.546 | 1.74  |
| CD28   | -0.166 | 0.296 | -0.56  | 0.576 | 0.847 | 0.251 | -0.609 | 0.543 | 0.474 | 1.514 |
| CD27   | -0.372 | 0.298 | -1.249 | 0.212 | 0.689 | 0.205 | -1.513 | 0.13  | 0.384 | 1.236 |
| CD248  | -0.272 | 0.296 | -0.917 | 0.359 | 0.762 | 0.226 | -1.054 | 0.292 | 0.426 | 1.362 |
| CD247  | -0.12  | 0.296 | -0.406 | 0.685 | 0.887 | 0.262 | -0.432 | 0.666 | 0.497 | 1.583 |
| CD244  | -0.428 | 0.298 | -1.437 | 0.151 | 0.652 | 0.194 | -1.793 | 0.073 | 0.363 | 1.169 |
| CD24   | 0.02   | 0.295 | 0.066  | 0.947 | 1.02  | 0.301 | 0.066  | 0.948 | 0.572 | 1.819 |
| CD226  | -0.042 | 0.296 | -0.14  | 0.889 | 0.959 | 0.284 | -0.143 | 0.886 | 0.537 | 1.715 |
| CD22   | 0.31   | 0.297 | 1.045  | 0.296 | 1.364 | 0.405 | 0.898  | 0.369 | 0.762 | 2.441 |
| CD209  | -0.082 | 0.296 | -0.278 | 0.781 | 0.921 | 0.273 | -0.29  | 0.772 | 0.515 | 1.646 |
| CD207  | 0.304  | 0.298 | 1.018  | 0.309 | 1.355 | 0.404 | 0.878  | 0.38  | 0.755 | 2.43  |
| CD200  | -0.965 | 0.316 | -3.056 | 0.002 | 0.381 | 0.12  | -5.145 | 0     | 0.205 | 0.707 |
| CD2    | -0.065 | 0.296 | -0.219 | 0.826 | 0.937 | 0.277 | -0.227 | 0.821 | 0.525 | 1.673 |
| CD1E   | -0.311 | 0.297 | -1.048 | 0.295 | 0.733 | 0.217 | -1.229 | 0.219 | 0.41  | 1.311 |
| CD1D   | -0.092 | 0.296 | -0.311 | 0.756 | 0.912 | 0.27  | -0.325 | 0.745 | 0.511 | 1.63  |
| CD1C   | -1.33  | 0.346 | -3.843 | 0     | 0.265 | 0.092 | -8.034 | 0     | 0.134 | 0.521 |
| CD1B   | -0.075 | 0.295 | -0.255 | 0.799 | 0.928 | 0.274 | -0.265 | 0.791 | 0.52  | 1.655 |
| CD1A   | -0.007 | 0.295 | -0.024 | 0.981 | 0.993 | 0.293 | -0.024 | 0.981 | 0.557 | 1.771 |
| CD19   | -0.706 | 0.306 | -2.305 | 0.021 | 0.494 | 0.151 | -3.348 | 0.001 | 0.271 | 0.9   |
| CD180  | -0.103 | 0.295 | -0.347 | 0.729 | 0.903 | 0.267 | -0.365 | 0.715 | 0.506 | 1.611 |
| CD177  | -0.244 | 0.296 | -0.822 | 0.411 | 0.784 | 0.232 | -0.931 | 0.352 | 0.439 | 1.401 |
| CD164  | -0.113 | 0.296 | -0.382 | 0.702 | 0.893 | 0.264 | -0.405 | 0.686 | 0.5   | 1.594 |
| CD163  | 0.226  | 0.296 | 0.761  | 0.447 | 1.253 | 0.371 | 0.681  | 0.496 | 0.701 | 2.239 |
| CD160  | 0.166  | 0.298 | 0.558  | 0.577 | 1.181 | 0.352 | 0.514  | 0.607 | 0.659 | 2.117 |
| CD151  | -0.41  | 0.302 | -1.355 | 0.175 | 0.664 | 0.201 | -1.674 | 0.094 | 0.367 | 1.201 |
| CD14   | -0.095 | 0.296 | -0.322 | 0.747 | 0.909 | 0.269 | -0.338 | 0.735 | 0.508 | 1.625 |
| CD101  | -0.024 | 0.296 | -0.08  | 0.936 | 0.977 | 0.289 | -0.081 | 0.935 | 0.547 | 1.745 |
| CCZ1B  | 0.407  | 0.302 | 1.346  | 0.178 | 1.503 | 0.455 | 1.106  | 0.269 | 0.831 | 2.718 |
| CCZ1   | 0.519  | 0.306 | 1.699  | 0.089 | 1.68  | 0.513 | 1.325  | 0.185 | 0.923 | 3.059 |
| CCT8L2 | 0.339  | 0.3   | 1.13   | 0.259 | 1.403 | 0.42  | 0.958  | 0.338 | 0.78  | 2.524 |
| CCT8   | 0.29   | 0.296 | 0.977  | 0.328 | 1.336 | 0.396 | 0.849  | 0.396 | 0.747 | 2.389 |
| CCT7   | 0.545  | 0.302 | 1.803  | 0.071 | 1.725 | 0.522 | 1.39   | 0.165 | 0.954 | 3.121 |
| CCT6B  | -0.207 | 0.298 | -0.696 | 0.487 | 0.813 | 0.242 | -0.773 | 0.44  | 0.453 | 1.458 |
| CCT6A  | 0.358  | 0.3   | 1.193  | 0.233 | 1.43  | 0.429 | 1.003  | 0.316 | 0.795 | 2.573 |
| CCT5   | 0.528  | 0.3   | 1.76   | 0.078 | 1.696 | 0.509 | 1.368  | 0.171 | 0.942 | 3.053 |
| CCT4   | 0.592  | 0.31  | 1.908  | 0.056 | 1.807 | 0.56  | 1.44   | 0.15  | 0.984 | 3.317 |
| CCT3   | 0.091  | 0.295 | 0.308  | 0.758 | 1.095 | 0.323 | 0.294  | 0.769 | 0.614 | 1.952 |

|          |        |       |        |       |       |       |        |       |       |       |
|----------|--------|-------|--------|-------|-------|-------|--------|-------|-------|-------|
| CCT2     | 0.322  | 0.297 | 1.084  | 0.278 | 1.38  | 0.409 | 0.927  | 0.354 | 0.771 | 2.468 |
| CCSER2   | -0.608 | 0.303 | -2.003 | 0.045 | 0.545 | 0.165 | -2.755 | 0.006 | 0.301 | 0.987 |
| CCS      | 0.274  | 0.297 | 0.926  | 0.355 | 1.316 | 0.39  | 0.81   | 0.418 | 0.736 | 2.353 |
| CCRL2    | 0.16   | 0.296 | 0.541  | 0.589 | 1.173 | 0.347 | 0.5    | 0.617 | 0.657 | 2.094 |
| CCR9     | 0.09   | 0.295 | 0.305  | 0.76  | 1.094 | 0.323 | 0.292  | 0.771 | 0.613 | 1.952 |
| CCR8     | -0.098 | 0.298 | -0.33  | 0.741 | 0.906 | 0.27  | -0.347 | 0.729 | 0.505 | 1.626 |
| CCR7     | 0.272  | 0.299 | 0.912  | 0.362 | 1.313 | 0.392 | 0.798  | 0.425 | 0.731 | 2.358 |
| CCR6     | -0.533 | 0.3   | -1.773 | 0.076 | 0.587 | 0.176 | -2.342 | 0.019 | 0.326 | 1.058 |
| CCR5     | 0.06   | 0.295 | 0.205  | 0.838 | 1.062 | 0.314 | 0.199  | 0.843 | 0.595 | 1.896 |
| CCR4     | 0.438  | 0.303 | 1.445  | 0.148 | 1.549 | 0.469 | 1.171  | 0.242 | 0.856 | 2.805 |
| CCR3     | 0.114  | 0.296 | 0.387  | 0.699 | 1.121 | 0.332 | 0.365  | 0.715 | 0.628 | 2.003 |
| CCR2     | -0.273 | 0.297 | -0.919 | 0.358 | 0.761 | 0.226 | -1.057 | 0.291 | 0.425 | 1.362 |
| CCR10    | -0.443 | 0.3   | -1.476 | 0.14  | 0.642 | 0.193 | -1.857 | 0.063 | 0.357 | 1.156 |
| CCR1     | 0.654  | 0.306 | 2.137  | 0.033 | 1.923 | 0.589 | 1.568  | 0.117 | 1.056 | 3.504 |
| CCPG1    | -0.243 | 0.3   | -0.811 | 0.418 | 0.784 | 0.235 | -0.918 | 0.359 | 0.435 | 1.412 |
| CCP110   | 0.085  | 0.295 | 0.289  | 0.772 | 1.089 | 0.322 | 0.277  | 0.782 | 0.611 | 1.943 |
| CCNT2    | -0.327 | 0.298 | -1.098 | 0.272 | 0.721 | 0.215 | -1.298 | 0.194 | 0.402 | 1.293 |
| CCNT1    | 0.388  | 0.298 | 1.302  | 0.193 | 1.474 | 0.44  | 1.079  | 0.281 | 0.822 | 2.645 |
| CCNP     | -0.328 | 0.298 | -1.1   | 0.271 | 0.721 | 0.215 | -1.302 | 0.193 | 0.402 | 1.292 |
| CCNO     | 0.194  | 0.296 | 0.654  | 0.513 | 1.214 | 0.359 | 0.595  | 0.552 | 0.68  | 2.167 |
| CCNL2    | -0.87  | 0.313 | -2.778 | 0.005 | 0.419 | 0.131 | -4.428 | 0     | 0.227 | 0.774 |
| CCNL1    | -0.055 | 0.297 | -0.186 | 0.852 | 0.946 | 0.281 | -0.191 | 0.848 | 0.528 | 1.695 |
| CCNK     | 0.067  | 0.295 | 0.227  | 0.82  | 1.069 | 0.316 | 0.22   | 0.826 | 0.599 | 1.908 |
| CCNJL    | 0.072  | 0.296 | 0.245  | 0.807 | 1.075 | 0.319 | 0.236  | 0.814 | 0.601 | 1.922 |
| CCNJ     | 0.964  | 0.321 | 3.003  | 0.003 | 2.623 | 0.842 | 1.927  | 0.054 | 1.398 | 4.922 |
| CCNI     | -0.381 | 0.3   | -1.273 | 0.203 | 0.683 | 0.205 | -1.549 | 0.121 | 0.38  | 1.229 |
| CCNH     | 0.179  | 0.296 | 0.606  | 0.545 | 1.196 | 0.354 | 0.554  | 0.579 | 0.67  | 2.138 |
| CCNG2    | -0.332 | 0.299 | -1.109 | 0.267 | 0.718 | 0.215 | -1.315 | 0.188 | 0.399 | 1.29  |
| CCNG1    | -0.751 | 0.315 | -2.386 | 0.017 | 0.472 | 0.149 | -3.556 | 0     | 0.254 | 0.875 |
| CCNF     | 0.447  | 0.3   | 1.491  | 0.136 | 1.564 | 0.469 | 1.203  | 0.229 | 0.869 | 2.815 |
| CCNE2    | 0.67   | 0.306 | 2.191  | 0.028 | 1.953 | 0.597 | 1.597  | 0.11  | 1.073 | 3.556 |
| CCNE1    | 0.565  | 0.302 | 1.868  | 0.062 | 1.759 | 0.532 | 1.427  | 0.153 | 0.973 | 3.181 |
| CCND3    | -0.064 | 0.295 | -0.215 | 0.83  | 0.938 | 0.277 | -0.222 | 0.824 | 0.526 | 1.674 |
| CCND2    | -0.999 | 0.317 | -3.153 | 0.002 | 0.368 | 0.117 | -5.416 | 0     | 0.198 | 0.685 |
| CCND1    | -0.342 | 0.303 | -1.129 | 0.259 | 0.711 | 0.215 | -1.346 | 0.178 | 0.393 | 1.286 |
| CCNC     | 0.136  | 0.297 | 0.46   | 0.646 | 1.146 | 0.34  | 0.43   | 0.667 | 0.641 | 2.05  |
| CCNB2    | 0.874  | 0.315 | 2.778  | 0.005 | 2.397 | 0.754 | 1.852  | 0.064 | 1.294 | 4.442 |
| CCNB1IP1 | 0.226  | 0.298 | 0.758  | 0.448 | 1.254 | 0.374 | 0.679  | 0.497 | 0.699 | 2.25  |

|         |        |       |        |       |       |       |        |       |       |       |
|---------|--------|-------|--------|-------|-------|-------|--------|-------|-------|-------|
| CCNB1   | 0.2    | 0.295 | 0.677  | 0.498 | 1.221 | 0.361 | 0.614  | 0.539 | 0.685 | 2.179 |
| CCNA2   | 0.593  | 0.306 | 1.937  | 0.053 | 1.809 | 0.554 | 1.462  | 0.144 | 0.993 | 3.297 |
| CCNA1   | 0.198  | 0.296 | 0.668  | 0.504 | 1.219 | 0.361 | 0.606  | 0.544 | 0.682 | 2.178 |
| CCN6    | 0.319  | 0.304 | 1.051  | 0.293 | 1.376 | 0.418 | 0.9    | 0.368 | 0.759 | 2.495 |
| CCN5    | -0.466 | 0.302 | -1.54  | 0.123 | 0.628 | 0.19  | -1.962 | 0.05  | 0.347 | 1.135 |
| CCN4    | -1.392 | 0.346 | -4.018 | 0     | 0.249 | 0.086 | -8.726 | 0     | 0.126 | 0.49  |
| CCN3    | -0.48  | 0.3   | -1.601 | 0.109 | 0.619 | 0.185 | -2.054 | 0.04  | 0.344 | 1.114 |
| CCN2    | -0.57  | 0.306 | -1.864 | 0.062 | 0.566 | 0.173 | -2.513 | 0.012 | 0.311 | 1.03  |
| CCN1    | -0.003 | 0.296 | -0.011 | 0.991 | 0.997 | 0.295 | -0.011 | 0.991 | 0.558 | 1.781 |
| CCL8    | 0.663  | 0.31  | 2.138  | 0.033 | 1.941 | 0.602 | 1.563  | 0.118 | 1.057 | 3.564 |
| CCL7    | 0.027  | 0.295 | 0.092  | 0.927 | 1.027 | 0.303 | 0.09   | 0.928 | 0.576 | 1.833 |
| CCL5    | 0.064  | 0.296 | 0.217  | 0.828 | 1.066 | 0.315 | 0.21   | 0.833 | 0.597 | 1.903 |
| CCL4    | -0.074 | 0.296 | -0.249 | 0.803 | 0.929 | 0.275 | -0.258 | 0.796 | 0.521 | 1.658 |
| CCL27   | -0.281 | 0.298 | -0.943 | 0.346 | 0.755 | 0.225 | -1.089 | 0.276 | 0.421 | 1.354 |
| CCL25   | 0.414  | 0.3   | 1.383  | 0.167 | 1.513 | 0.453 | 1.132  | 0.258 | 0.841 | 2.722 |
| CCL24   | 0.408  | 0.303 | 1.346  | 0.178 | 1.503 | 0.455 | 1.106  | 0.269 | 0.83  | 2.721 |
| CCL23   | -0.548 | 0.303 | -1.812 | 0.07  | 0.578 | 0.175 | -2.413 | 0.016 | 0.319 | 1.046 |
| CCL22   | -0.558 | 0.303 | -1.842 | 0.066 | 0.573 | 0.173 | -2.466 | 0.014 | 0.316 | 1.036 |
| CCL21   | -0.237 | 0.296 | -0.8   | 0.424 | 0.789 | 0.234 | -0.903 | 0.367 | 0.442 | 1.41  |
| CCL20   | -0.128 | 0.296 | -0.431 | 0.666 | 0.88  | 0.261 | -0.46  | 0.646 | 0.492 | 1.573 |
| CCL2    | 0.031  | 0.296 | 0.104  | 0.917 | 1.031 | 0.305 | 0.103  | 0.918 | 0.578 | 1.841 |
| CCL19   | -0.275 | 0.297 | -0.928 | 0.353 | 0.759 | 0.225 | -1.069 | 0.285 | 0.425 | 1.358 |
| CCL18   | 0.184  | 0.296 | 0.621  | 0.535 | 1.202 | 0.356 | 0.567  | 0.571 | 0.673 | 2.148 |
| CCL17   | 0.553  | 0.302 | 1.828  | 0.067 | 1.738 | 0.526 | 1.405  | 0.16  | 0.961 | 3.145 |
| CCL16   | -0.553 | 0.303 | -1.827 | 0.068 | 0.575 | 0.174 | -2.441 | 0.015 | 0.318 | 1.041 |
| CCL13   | -0.477 | 0.3   | -1.588 | 0.112 | 0.621 | 0.186 | -2.035 | 0.042 | 0.345 | 1.118 |
| CCL11   | -0.416 | 0.3   | -1.39  | 0.165 | 0.659 | 0.198 | -1.724 | 0.085 | 0.367 | 1.186 |
| CCL1    | -0.219 | 0.298 | -0.737 | 0.461 | 0.803 | 0.239 | -0.825 | 0.41  | 0.448 | 1.439 |
| CCKBR   | 0.307  | 0.298 | 1.032  | 0.302 | 1.36  | 0.405 | 0.889  | 0.374 | 0.759 | 2.438 |
| CCKAR   | 0.138  | 0.296 | 0.468  | 0.639 | 1.149 | 0.339 | 0.437  | 0.662 | 0.643 | 2.05  |
| CCK     | -0.325 | 0.302 | -1.078 | 0.281 | 0.722 | 0.218 | -1.274 | 0.203 | 0.4   | 1.305 |
| CCIN    | -0.136 | 0.296 | -0.46  | 0.645 | 0.873 | 0.258 | -0.493 | 0.622 | 0.488 | 1.559 |
| CCHCR1  | 0.291  | 0.298 | 0.977  | 0.329 | 1.338 | 0.398 | 0.847  | 0.397 | 0.746 | 2.398 |
| CCDC93  | 0.142  | 0.298 | 0.475  | 0.635 | 1.152 | 0.344 | 0.443  | 0.658 | 0.642 | 2.068 |
| CCDC92  | -0.391 | 0.3   | -1.305 | 0.192 | 0.676 | 0.203 | -1.597 | 0.11  | 0.376 | 1.217 |
| CCDC91  | -0.437 | 0.306 | -1.428 | 0.153 | 0.646 | 0.198 | -1.791 | 0.073 | 0.354 | 1.177 |
| CCDC90B | -0.036 | 0.296 | -0.123 | 0.902 | 0.964 | 0.285 | -0.125 | 0.901 | 0.54  | 1.722 |
| CCDC9   | 0.223  | 0.299 | 0.746  | 0.456 | 1.25  | 0.374 | 0.668  | 0.504 | 0.695 | 2.248 |

|          |        |       |        |       |       |       |        |       |       |       |
|----------|--------|-------|--------|-------|-------|-------|--------|-------|-------|-------|
| CCDC88C  | 0.313  | 0.297 | 1.054  | 0.292 | 1.368 | 0.407 | 0.905  | 0.366 | 0.764 | 2.451 |
| CCDC88A  | 0.462  | 0.303 | 1.525  | 0.127 | 1.587 | 0.48  | 1.221  | 0.222 | 0.877 | 2.872 |
| CCDC87   | -0.027 | 0.295 | -0.09  | 0.928 | 0.974 | 0.288 | -0.091 | 0.927 | 0.546 | 1.737 |
| CCDC86   | 0.7    | 0.306 | 2.289  | 0.022 | 2.014 | 0.616 | 1.646  | 0.1   | 1.106 | 3.668 |
| CCDC85C  | 0.531  | 0.302 | 1.757  | 0.079 | 1.701 | 0.515 | 1.363  | 0.173 | 0.94  | 3.077 |
| CCDC85B  | -0.011 | 0.296 | -0.036 | 0.971 | 0.989 | 0.293 | -0.037 | 0.971 | 0.554 | 1.767 |
| CCDC82   | -0.09  | 0.295 | -0.303 | 0.762 | 0.914 | 0.27  | -0.317 | 0.751 | 0.512 | 1.631 |
| CCDC81   | -0.131 | 0.296 | -0.443 | 0.658 | 0.877 | 0.26  | -0.473 | 0.636 | 0.491 | 1.567 |
| CCDC71   | 0.14   | 0.295 | 0.475  | 0.635 | 1.151 | 0.34  | 0.443  | 0.658 | 0.645 | 2.053 |
| CCDC70   | 0.357  | 0.298 | 1.198  | 0.231 | 1.429 | 0.426 | 1.007  | 0.314 | 0.797 | 2.564 |
| CCDC7    | -0.236 | 0.296 | -0.798 | 0.425 | 0.789 | 0.234 | -0.9   | 0.368 | 0.442 | 1.411 |
| CCDC69   | -0.525 | 0.306 | -1.714 | 0.087 | 0.592 | 0.181 | -2.254 | 0.024 | 0.325 | 1.078 |
| CCDC68   | -0.169 | 0.296 | -0.571 | 0.568 | 0.844 | 0.25  | -0.622 | 0.534 | 0.472 | 1.509 |
| CCDC6    | 0.107  | 0.297 | 0.359  | 0.719 | 1.113 | 0.331 | 0.341  | 0.733 | 0.621 | 1.992 |
| CCDC59   | 0.425  | 0.3   | 1.418  | 0.156 | 1.529 | 0.458 | 1.155  | 0.248 | 0.85  | 2.751 |
| CCDC57   | 0.582  | 0.302 | 1.923  | 0.054 | 1.789 | 0.541 | 1.458  | 0.145 | 0.989 | 3.237 |
| CCDC51   | 0.412  | 0.299 | 1.379  | 0.168 | 1.51  | 0.451 | 1.13   | 0.258 | 0.841 | 2.713 |
| CCDC47   | -0.153 | 0.297 | -0.514 | 0.607 | 0.858 | 0.255 | -0.556 | 0.578 | 0.48  | 1.536 |
| CCDC40   | -0.16  | 0.296 | -0.54  | 0.589 | 0.852 | 0.252 | -0.585 | 0.559 | 0.477 | 1.522 |
| CCDC33   | 0.275  | 0.298 | 0.923  | 0.356 | 1.316 | 0.392 | 0.807  | 0.42  | 0.734 | 2.359 |
| CCDC30   | 0.605  | 0.306 | 1.98   | 0.048 | 1.832 | 0.56  | 1.485  | 0.137 | 1.006 | 3.335 |
| CCDC28B  | 0.313  | 0.298 | 1.052  | 0.293 | 1.368 | 0.407 | 0.903  | 0.366 | 0.763 | 2.452 |
| CCDC28A  | -0.207 | 0.298 | -0.694 | 0.488 | 0.813 | 0.242 | -0.771 | 0.441 | 0.453 | 1.459 |
| CCDC25   | -0.36  | 0.3   | -1.201 | 0.23  | 0.698 | 0.209 | -1.446 | 0.148 | 0.388 | 1.255 |
| CCDC22   | 0.164  | 0.296 | 0.553  | 0.58  | 1.178 | 0.349 | 0.51   | 0.61  | 0.659 | 2.105 |
| CCDC198  | -0.224 | 0.298 | -0.752 | 0.452 | 0.8   | 0.238 | -0.842 | 0.4   | 0.446 | 1.433 |
| CCDC186  | -0.087 | 0.295 | -0.295 | 0.768 | 0.916 | 0.271 | -0.309 | 0.758 | 0.514 | 1.635 |
| CCDC181  | 0.351  | 0.298 | 1.178  | 0.239 | 1.42  | 0.423 | 0.993  | 0.321 | 0.792 | 2.545 |
| CCDC177  | -0.126 | 0.298 | -0.424 | 0.672 | 0.881 | 0.263 | -0.452 | 0.651 | 0.491 | 1.582 |
| CCDC170  | -0.474 | 0.306 | -1.546 | 0.122 | 0.623 | 0.191 | -1.977 | 0.048 | 0.342 | 1.135 |
| CCDC15   | 0.178  | 0.296 | 0.603  | 0.547 | 1.195 | 0.354 | 0.552  | 0.581 | 0.669 | 2.136 |
| CCDC144A | 0.249  | 0.296 | 0.842  | 0.4   | 1.283 | 0.38  | 0.745  | 0.456 | 0.718 | 2.294 |
| CCDC134  | 0.509  | 0.301 | 1.691  | 0.091 | 1.663 | 0.5   | 1.325  | 0.185 | 0.922 | 2.998 |
| CCDC130  | -0.108 | 0.297 | -0.365 | 0.715 | 0.897 | 0.267 | -0.385 | 0.7   | 0.501 | 1.606 |
| CCDC121  | -0.211 | 0.297 | -0.713 | 0.476 | 0.809 | 0.24  | -0.794 | 0.427 | 0.453 | 1.447 |
| CCDC106  | -0.252 | 0.301 | -0.835 | 0.404 | 0.778 | 0.234 | -0.949 | 0.343 | 0.431 | 1.404 |
| CCDC102B | -0.208 | 0.296 | -0.703 | 0.482 | 0.812 | 0.241 | -0.781 | 0.435 | 0.454 | 1.451 |
| CCAR2    | 0.079  | 0.296 | 0.267  | 0.789 | 1.082 | 0.32  | 0.257  | 0.797 | 0.606 | 1.931 |

|          |        |       |        |       |       |       |        |       |       |       |
|----------|--------|-------|--------|-------|-------|-------|--------|-------|-------|-------|
| CC2D1A   | 0.306  | 0.298 | 1.027  | 0.304 | 1.358 | 0.405 | 0.885  | 0.376 | 0.757 | 2.438 |
| CBY1     | -0.109 | 0.295 | -0.369 | 0.712 | 0.897 | 0.265 | -0.39  | 0.697 | 0.503 | 1.6   |
| CBX8     | -0.273 | 0.298 | -0.917 | 0.359 | 0.761 | 0.227 | -1.054 | 0.292 | 0.425 | 1.364 |
| CBX7     | -0.41  | 0.3   | -1.369 | 0.171 | 0.664 | 0.199 | -1.693 | 0.091 | 0.369 | 1.194 |
| CBX6     | -0.231 | 0.296 | -0.781 | 0.435 | 0.794 | 0.235 | -0.878 | 0.38  | 0.444 | 1.418 |
| CBX5     | -0.735 | 0.31  | -2.373 | 0.018 | 0.479 | 0.149 | -3.506 | 0     | 0.261 | 0.88  |
| CBX4     | -0.189 | 0.296 | -0.639 | 0.523 | 0.828 | 0.245 | -0.703 | 0.482 | 0.463 | 1.479 |
| CBX3     | 0.461  | 0.3   | 1.538  | 0.124 | 1.586 | 0.475 | 1.232  | 0.218 | 0.881 | 2.853 |
| CBX2     | 0.34   | 0.298 | 1.144  | 0.253 | 1.406 | 0.418 | 0.97   | 0.332 | 0.784 | 2.519 |
| CBX1     | 0.846  | 0.315 | 2.689  | 0.007 | 2.331 | 0.734 | 1.814  | 0.07  | 1.258 | 4.319 |
| CBS      | -0.019 | 0.295 | -0.065 | 0.949 | 0.981 | 0.29  | -0.065 | 0.948 | 0.55  | 1.75  |
| CBR4     | -0.356 | 0.298 | -1.194 | 0.233 | 0.701 | 0.209 | -1.434 | 0.152 | 0.391 | 1.257 |
| CBR3     | 0.195  | 0.298 | 0.656  | 0.512 | 1.216 | 0.362 | 0.596  | 0.551 | 0.678 | 2.181 |
| CBR1     | 0.09   | 0.297 | 0.303  | 0.762 | 1.094 | 0.324 | 0.29   | 0.772 | 0.612 | 1.957 |
| CBLN1    | 0.236  | 0.298 | 0.792  | 0.428 | 1.266 | 0.378 | 0.706  | 0.48  | 0.706 | 2.272 |
| CBLL1    | -0.041 | 0.295 | -0.139 | 0.89  | 0.96  | 0.283 | -0.142 | 0.887 | 0.538 | 1.712 |
| CBLIF    | 0.143  | 0.295 | 0.485  | 0.628 | 1.154 | 0.341 | 0.452  | 0.651 | 0.647 | 2.058 |
| CBLC     | -0.244 | 0.3   | -0.813 | 0.416 | 0.783 | 0.235 | -0.921 | 0.357 | 0.435 | 1.411 |
| CBLB     | -0.035 | 0.295 | -0.118 | 0.906 | 0.966 | 0.285 | -0.12  | 0.904 | 0.542 | 1.722 |
| CBL      | 0.294  | 0.301 | 0.977  | 0.329 | 1.342 | 0.404 | 0.846  | 0.397 | 0.744 | 2.423 |
| CBFB     | 0.325  | 0.298 | 1.093  | 0.274 | 1.384 | 0.412 | 0.933  | 0.351 | 0.773 | 2.481 |
| CBFA2T3  | -0.002 | 0.296 | -0.008 | 0.994 | 0.998 | 0.296 | -0.008 | 0.993 | 0.558 | 1.784 |
| CBFA2T2  | -0.225 | 0.297 | -0.759 | 0.448 | 0.798 | 0.237 | -0.851 | 0.395 | 0.446 | 1.428 |
| CBARP    | 0.153  | 0.295 | 0.519  | 0.604 | 1.166 | 0.344 | 0.481  | 0.63  | 0.653 | 2.079 |
| CAVIN3   | -0.201 | 0.296 | -0.68  | 0.497 | 0.818 | 0.242 | -0.753 | 0.452 | 0.457 | 1.461 |
| CAVIN2   | -0.327 | 0.3   | -1.093 | 0.275 | 0.721 | 0.216 | -1.293 | 0.196 | 0.401 | 1.297 |
| CAVIN1   | -0.949 | 0.316 | -3.003 | 0.003 | 0.387 | 0.122 | -5.01  | 0     | 0.208 | 0.719 |
| CAV3     | -0.28  | 0.298 | -0.938 | 0.348 | 0.756 | 0.225 | -1.083 | 0.279 | 0.422 | 1.356 |
| CAV2     | -0.87  | 0.311 | -2.798 | 0.005 | 0.419 | 0.13  | -4.462 | 0     | 0.228 | 0.77  |
| CAV1     | -0.458 | 0.3   | -1.525 | 0.127 | 0.633 | 0.19  | -1.934 | 0.053 | 0.351 | 1.14  |
| CATSPERG | 0.266  | 0.298 | 0.894  | 0.371 | 1.305 | 0.389 | 0.785  | 0.432 | 0.728 | 2.341 |
| CATSPERB | -0.392 | 0.3   | -1.307 | 0.191 | 0.675 | 0.203 | -1.601 | 0.109 | 0.375 | 1.216 |
| CATR1    | 0.521  | 0.302 | 1.723  | 0.085 | 1.684 | 0.509 | 1.343  | 0.179 | 0.931 | 3.047 |
| CAT      | -0.166 | 0.295 | -0.561 | 0.575 | 0.847 | 0.25  | -0.61  | 0.542 | 0.475 | 1.512 |
| CASZ1    | 0.252  | 0.298 | 0.848  | 0.397 | 1.287 | 0.383 | 0.749  | 0.454 | 0.718 | 2.307 |
| CAST     | -0.94  | 0.321 | -2.931 | 0.003 | 0.391 | 0.125 | -4.864 | 0     | 0.208 | 0.732 |
| CASS4    | 0.07   | 0.295 | 0.239  | 0.811 | 1.073 | 0.317 | 0.231  | 0.818 | 0.602 | 1.913 |
| CASR     | -0.103 | 0.296 | -0.35  | 0.726 | 0.902 | 0.267 | -0.369 | 0.712 | 0.505 | 1.609 |



|          |        |       |        |       |       |       |        |       |       |       |
|----------|--------|-------|--------|-------|-------|-------|--------|-------|-------|-------|
| CASQ2    | -0.41  | 0.3   | -1.367 | 0.171 | 0.664 | 0.199 | -1.69  | 0.091 | 0.369 | 1.194 |
| CASQ1    | -0.376 | 0.298 | -1.261 | 0.207 | 0.687 | 0.205 | -1.531 | 0.126 | 0.383 | 1.231 |
| CASP9    | -0.843 | 0.312 | -2.702 | 0.007 | 0.431 | 0.134 | -4.241 | 0     | 0.234 | 0.793 |
| CASP8AP2 | 0.549  | 0.302 | 1.816  | 0.069 | 1.732 | 0.524 | 1.397  | 0.162 | 0.957 | 3.132 |
| CASP8    | -0.298 | 0.296 | -1.005 | 0.315 | 0.742 | 0.22  | -1.171 | 0.242 | 0.415 | 1.327 |
| CASP7    | 0.356  | 0.3   | 1.189  | 0.234 | 1.428 | 0.428 | 1      | 0.317 | 0.794 | 2.57  |
| CASP6    | -0.126 | 0.296 | -0.424 | 0.671 | 0.882 | 0.261 | -0.452 | 0.651 | 0.494 | 1.576 |
| CASP5    | -0.345 | 0.3   | -1.151 | 0.25  | 0.708 | 0.212 | -1.375 | 0.169 | 0.394 | 1.274 |
| CASP4LP  | 0.459  | 0.3   | 1.53   | 0.126 | 1.582 | 0.474 | 1.227  | 0.22  | 0.879 | 2.848 |
| CASP4    | 0.106  | 0.296 | 0.359  | 0.72  | 1.112 | 0.329 | 0.341  | 0.733 | 0.623 | 1.985 |
| CASP3    | 0.489  | 0.302 | 1.617  | 0.106 | 1.631 | 0.493 | 1.279  | 0.201 | 0.902 | 2.95  |
| CASP2    | -0.259 | 0.299 | -0.866 | 0.386 | 0.772 | 0.231 | -0.989 | 0.323 | 0.43  | 1.386 |
| CASP10   | 0.538  | 0.302 | 1.78   | 0.075 | 1.713 | 0.518 | 1.377  | 0.169 | 0.947 | 3.098 |
| CASP1    | -0.173 | 0.296 | -0.583 | 0.56  | 0.841 | 0.249 | -0.637 | 0.524 | 0.47  | 1.504 |
| CASKIN2  | -0.21  | 0.296 | -0.708 | 0.479 | 0.811 | 0.24  | -0.788 | 0.431 | 0.454 | 1.449 |
| CASK     | -0.659 | 0.307 | -2.146 | 0.032 | 0.517 | 0.159 | -3.038 | 0.002 | 0.283 | 0.944 |
| CASD1    | -0.532 | 0.306 | -1.738 | 0.082 | 0.587 | 0.18  | -2.294 | 0.022 | 0.322 | 1.07  |
| CARTPT   | 0.133  | 0.296 | 0.451  | 0.652 | 1.143 | 0.338 | 0.422  | 0.673 | 0.64  | 2.039 |
| CARS2    | 0.489  | 0.3   | 1.628  | 0.104 | 1.631 | 0.49  | 1.287  | 0.198 | 0.905 | 2.939 |
| CARS1    | 0.85   | 0.311 | 2.737  | 0.006 | 2.34  | 0.727 | 1.844  | 0.065 | 1.273 | 4.301 |
| CARMIL1  | 0.101  | 0.296 | 0.341  | 0.733 | 1.106 | 0.328 | 0.325  | 0.745 | 0.619 | 1.977 |
| CARHSP1  | 0.237  | 0.296 | 0.798  | 0.425 | 1.267 | 0.375 | 0.711  | 0.477 | 0.709 | 2.264 |
| CARF     | -0.334 | 0.3   | -1.113 | 0.266 | 0.716 | 0.215 | -1.322 | 0.186 | 0.398 | 1.289 |
| CARD8    | -0.308 | 0.298 | -1.033 | 0.302 | 0.735 | 0.219 | -1.21  | 0.226 | 0.41  | 1.318 |
| CARD14   | -0.175 | 0.296 | -0.592 | 0.554 | 0.839 | 0.248 | -0.647 | 0.517 | 0.47  | 1.498 |
| CARD10   | -0.207 | 0.296 | -0.698 | 0.485 | 0.813 | 0.241 | -0.775 | 0.438 | 0.455 | 1.453 |
| CAPZB    | -0.741 | 0.306 | -2.419 | 0.016 | 0.477 | 0.146 | -3.584 | 0     | 0.261 | 0.869 |
| CAPZA2   | -0.297 | 0.3   | -0.992 | 0.321 | 0.743 | 0.223 | -1.155 | 0.248 | 0.413 | 1.336 |
| CAPZA1   | 0.418  | 0.302 | 1.383  | 0.167 | 1.519 | 0.459 | 1.131  | 0.258 | 0.84  | 2.746 |
| CAPRIN2  | -0.196 | 0.297 | -0.659 | 0.51  | 0.822 | 0.244 | -0.729 | 0.466 | 0.459 | 1.472 |
| CAPRIN1  | -0.188 | 0.296 | -0.634 | 0.526 | 0.829 | 0.246 | -0.697 | 0.486 | 0.464 | 1.481 |
| CAPNS1   | -0.411 | 0.302 | -1.36  | 0.174 | 0.663 | 0.2   | -1.682 | 0.093 | 0.366 | 1.199 |
| CAPN9    | -0.235 | 0.296 | -0.795 | 0.427 | 0.79  | 0.234 | -0.896 | 0.37  | 0.442 | 1.412 |
| CAPN7    | -0.78  | 0.315 | -2.475 | 0.013 | 0.459 | 0.144 | -3.749 | 0     | 0.247 | 0.85  |
| CAPN6    | -0.043 | 0.295 | -0.147 | 0.883 | 0.958 | 0.283 | -0.15  | 0.881 | 0.537 | 1.707 |
| CAPN5    | -0.398 | 0.3   | -1.328 | 0.184 | 0.671 | 0.201 | -1.631 | 0.103 | 0.373 | 1.209 |
| CAPN3    | 0.174  | 0.302 | 0.577  | 0.564 | 1.19  | 0.359 | 0.529  | 0.596 | 0.659 | 2.149 |
| CAPN2    | 0.424  | 0.3   | 1.414  | 0.157 | 1.528 | 0.458 | 1.153  | 0.249 | 0.849 | 2.751 |

|         |        |       |        |       |       |       |        |       |       |       |
|---------|--------|-------|--------|-------|-------|-------|--------|-------|-------|-------|
| CAPN15  | 0.122  | 0.295 | 0.413  | 0.68  | 1.13  | 0.334 | 0.389  | 0.698 | 0.633 | 2.016 |
| CAPN11  | -0.03  | 0.296 | -0.102 | 0.919 | 0.97  | 0.288 | -0.103 | 0.918 | 0.543 | 1.735 |
| CAPN10  | -0.377 | 0.3   | -1.259 | 0.208 | 0.686 | 0.205 | -1.529 | 0.126 | 0.381 | 1.234 |
| CAPN1   | 0.088  | 0.298 | 0.295  | 0.768 | 1.092 | 0.325 | 0.282  | 0.778 | 0.609 | 1.956 |
| CAPG    | 0.645  | 0.304 | 2.123  | 0.034 | 1.906 | 0.579 | 1.564  | 0.118 | 1.051 | 3.458 |
| CAP2    | 0.022  | 0.295 | 0.073  | 0.942 | 1.022 | 0.302 | 0.072  | 0.942 | 0.573 | 1.823 |
| CAP1    | -0.279 | 0.298 | -0.936 | 0.349 | 0.757 | 0.225 | -1.08  | 0.28  | 0.422 | 1.356 |
| CANX    | -0.337 | 0.298 | -1.131 | 0.258 | 0.714 | 0.213 | -1.345 | 0.179 | 0.398 | 1.281 |
| CANT1   | 0.706  | 0.31  | 2.277  | 0.023 | 2.026 | 0.629 | 1.633  | 0.103 | 1.103 | 3.722 |
| CAND2   | 0.442  | 0.299 | 1.479  | 0.139 | 1.556 | 0.465 | 1.195  | 0.232 | 0.866 | 2.796 |
| CAND1   | 0.401  | 0.298 | 1.345  | 0.179 | 1.493 | 0.445 | 1.108  | 0.268 | 0.833 | 2.676 |
| CAMTA2  | 0.015  | 0.295 | 0.051  | 0.959 | 1.015 | 0.299 | 0.051  | 0.959 | 0.569 | 1.81  |
| CAMTA1  | -0.473 | 0.302 | -1.564 | 0.118 | 0.623 | 0.188 | -2     | 0.046 | 0.345 | 1.127 |
| CAMSAP2 | 0.31   | 0.3   | 1.035  | 0.301 | 1.364 | 0.409 | 0.89   | 0.374 | 0.758 | 2.455 |
| CAMSAP1 | -0.03  | 0.296 | -0.101 | 0.919 | 0.97  | 0.287 | -0.103 | 0.918 | 0.544 | 1.732 |
| CAMP    | 0.492  | 0.302 | 1.627  | 0.104 | 1.635 | 0.494 | 1.285  | 0.199 | 0.904 | 2.956 |
| CAMLG   | -0.281 | 0.3   | -0.936 | 0.349 | 0.755 | 0.227 | -1.08  | 0.28  | 0.42  | 1.36  |
| CAMKV   | -0.03  | 0.295 | -0.102 | 0.919 | 0.97  | 0.287 | -0.104 | 0.917 | 0.544 | 1.731 |
| CAMKMT  | -0.424 | 0.302 | -1.403 | 0.16  | 0.654 | 0.198 | -1.748 | 0.08  | 0.362 | 1.183 |
| CAMKK2  | 0.539  | 0.306 | 1.758  | 0.079 | 1.714 | 0.525 | 1.359  | 0.174 | 0.94  | 3.126 |
| CAMK4   | 0.013  | 0.295 | 0.043  | 0.966 | 1.013 | 0.299 | 0.042  | 0.966 | 0.568 | 1.806 |
| CAMK2N1 | -0.183 | 0.296 | -0.616 | 0.538 | 0.833 | 0.247 | -0.676 | 0.499 | 0.466 | 1.489 |
| CAMK2G  | -0.229 | 0.3   | -0.763 | 0.445 | 0.795 | 0.239 | -0.857 | 0.391 | 0.442 | 1.432 |
| CAMK2B  | 0.229  | 0.298 | 0.767  | 0.443 | 1.257 | 0.375 | 0.685  | 0.493 | 0.701 | 2.254 |
| CAMK2A  | 0.246  | 0.298 | 0.825  | 0.409 | 1.278 | 0.38  | 0.732  | 0.464 | 0.713 | 2.29  |
| CAMK1G  | -0.07  | 0.295 | -0.238 | 0.812 | 0.932 | 0.275 | -0.247 | 0.805 | 0.522 | 1.663 |
| CAMK1D  | 0.291  | 0.3   | 0.971  | 0.332 | 1.338 | 0.402 | 0.842  | 0.4   | 0.743 | 2.409 |
| CAMK1   | -0.375 | 0.3   | -1.25  | 0.211 | 0.687 | 0.206 | -1.516 | 0.129 | 0.382 | 1.237 |
| CALY    | -0.134 | 0.295 | -0.454 | 0.65  | 0.874 | 0.258 | -0.486 | 0.627 | 0.49  | 1.56  |
| CALU    | -0.272 | 0.296 | -0.917 | 0.359 | 0.762 | 0.226 | -1.053 | 0.292 | 0.426 | 1.362 |
| CALR    | 0.089  | 0.297 | 0.3    | 0.764 | 1.093 | 0.325 | 0.287  | 0.774 | 0.611 | 1.956 |
| CALML5  | 0.23   | 0.298 | 0.774  | 0.439 | 1.259 | 0.375 | 0.691  | 0.49  | 0.702 | 2.256 |
| CALML4  | 0.204  | 0.296 | 0.689  | 0.491 | 1.227 | 0.363 | 0.624  | 0.533 | 0.686 | 2.192 |
| CALML3  | 0.043  | 0.295 | 0.145  | 0.885 | 1.044 | 0.308 | 0.142  | 0.887 | 0.585 | 1.862 |
| CALM1   | -0.199 | 0.296 | -0.67  | 0.503 | 0.82  | 0.243 | -0.741 | 0.459 | 0.459 | 1.466 |
| CALHM2  | -0.899 | 0.316 | -2.849 | 0.004 | 0.407 | 0.128 | -4.618 | 0     | 0.219 | 0.755 |
| CALD1   | -0.635 | 0.304 | -2.088 | 0.037 | 0.53  | 0.161 | -2.917 | 0.004 | 0.292 | 0.962 |
| CALCRL  | -0.3   | 0.297 | -1.013 | 0.311 | 0.74  | 0.22  | -1.182 | 0.237 | 0.414 | 1.324 |

|           |        |       |        |       |       |       |        |       |       |       |
|-----------|--------|-------|--------|-------|-------|-------|--------|-------|-------|-------|
| CALCR     | -0.075 | 0.296 | -0.254 | 0.799 | 0.928 | 0.274 | -0.264 | 0.792 | 0.52  | 1.656 |
| CALCOCO2  | -0.035 | 0.295 | -0.118 | 0.906 | 0.966 | 0.285 | -0.12  | 0.905 | 0.542 | 1.723 |
| CALCOCO1  | -0.786 | 0.311 | -2.526 | 0.012 | 0.456 | 0.142 | -3.839 | 0     | 0.248 | 0.839 |
| CALCB     | 0.007  | 0.295 | 0.024  | 0.981 | 1.007 | 0.298 | 0.024  | 0.981 | 0.564 | 1.797 |
| CALCA     | 0.093  | 0.299 | 0.312  | 0.755 | 1.098 | 0.328 | 0.298  | 0.766 | 0.611 | 1.97  |
| CALB2     | 0.268  | 0.298 | 0.901  | 0.367 | 1.308 | 0.389 | 0.791  | 0.429 | 0.73  | 2.344 |
| CALB1     | 0.128  | 0.295 | 0.433  | 0.665 | 1.136 | 0.336 | 0.406  | 0.685 | 0.637 | 2.027 |
| CADPS2    | -0.652 | 0.306 | -2.132 | 0.033 | 0.521 | 0.159 | -3.005 | 0.003 | 0.286 | 0.949 |
| CADPS     | 0.227  | 0.298 | 0.76   | 0.447 | 1.255 | 0.374 | 0.68   | 0.497 | 0.699 | 2.252 |
| CADM4     | 0.363  | 0.298 | 1.217  | 0.224 | 1.438 | 0.429 | 1.021  | 0.307 | 0.801 | 2.579 |
| CADM3-AS1 | 0.165  | 0.295 | 0.557  | 0.577 | 1.179 | 0.348 | 0.514  | 0.607 | 0.661 | 2.103 |
| CADM3     | -0.458 | 0.301 | -1.521 | 0.128 | 0.633 | 0.19  | -1.929 | 0.054 | 0.351 | 1.141 |
| CADM1     | -0.376 | 0.298 | -1.263 | 0.207 | 0.687 | 0.204 | -1.533 | 0.125 | 0.383 | 1.231 |
| CAD       | -0.337 | 0.297 | -1.135 | 0.256 | 0.714 | 0.212 | -1.349 | 0.177 | 0.399 | 1.278 |
| CACYBP    | 0.225  | 0.298 | 0.756  | 0.45  | 1.252 | 0.373 | 0.677  | 0.499 | 0.699 | 2.245 |
| CACTIN    | -0.019 | 0.295 | -0.063 | 0.95  | 0.982 | 0.289 | -0.064 | 0.949 | 0.551 | 1.75  |
| CACNG5    | 0.421  | 0.3   | 1.405  | 0.16  | 1.524 | 0.457 | 1.147  | 0.252 | 0.847 | 2.742 |
| CACNG4    | -0.194 | 0.296 | -0.655 | 0.512 | 0.824 | 0.244 | -0.723 | 0.47  | 0.461 | 1.471 |
| CACNG3    | -0.112 | 0.296 | -0.379 | 0.705 | 0.894 | 0.265 | -0.401 | 0.689 | 0.5   | 1.598 |
| CACNG2    | -0.052 | 0.295 | -0.176 | 0.86  | 0.949 | 0.28  | -0.18  | 0.857 | 0.532 | 1.694 |
| CACNG1    | 0.096  | 0.295 | 0.327  | 0.744 | 1.101 | 0.325 | 0.312  | 0.755 | 0.617 | 1.964 |
| CACNB4    | -0.202 | 0.297 | -0.681 | 0.496 | 0.817 | 0.243 | -0.754 | 0.451 | 0.457 | 1.462 |
| CACNB3    | 0.681  | 0.304 | 2.24   | 0.025 | 1.976 | 0.601 | 1.624  | 0.104 | 1.089 | 3.586 |
| CACNB2    | -0.125 | 0.296 | -0.422 | 0.673 | 0.883 | 0.261 | -0.449 | 0.653 | 0.495 | 1.576 |
| CACNB1    | 0.121  | 0.297 | 0.407  | 0.684 | 1.128 | 0.335 | 0.383  | 0.702 | 0.631 | 2.018 |
| CACNA2D3  | -0.405 | 0.3   | -1.349 | 0.177 | 0.667 | 0.2   | -1.663 | 0.096 | 0.371 | 1.201 |
| CACNA2D2  | -0.057 | 0.297 | -0.191 | 0.849 | 0.945 | 0.281 | -0.196 | 0.844 | 0.528 | 1.692 |
| CACNA2D1  | 0.25   | 0.298 | 0.839  | 0.401 | 1.284 | 0.382 | 0.742  | 0.458 | 0.716 | 2.302 |
| CACNA1S   | 0.235  | 0.297 | 0.793  | 0.428 | 1.265 | 0.375 | 0.706  | 0.48  | 0.707 | 2.262 |
| CACNA1I   | 0.059  | 0.295 | 0.2    | 0.842 | 1.061 | 0.313 | 0.194  | 0.846 | 0.595 | 1.893 |
| CACNA1H   | -0.439 | 0.3   | -1.46  | 0.144 | 0.645 | 0.194 | -1.832 | 0.067 | 0.358 | 1.162 |
| CACNA1G   | 0.224  | 0.299 | 0.751  | 0.453 | 1.251 | 0.374 | 0.672  | 0.501 | 0.697 | 2.246 |
| CACNA1F   | -0.014 | 0.295 | -0.047 | 0.963 | 0.986 | 0.291 | -0.047 | 0.962 | 0.553 | 1.758 |
| CACNA1E   | -0.15  | 0.295 | -0.509 | 0.61  | 0.86  | 0.254 | -0.55  | 0.582 | 0.482 | 1.535 |
| CACNA1D   | -0.369 | 0.3   | -1.23  | 0.219 | 0.691 | 0.208 | -1.488 | 0.137 | 0.384 | 1.245 |
| CACNA1C   | -0.595 | 0.306 | -1.946 | 0.052 | 0.552 | 0.169 | -2.659 | 0.008 | 0.303 | 1.004 |
| CACNA1B   | 0.368  | 0.298 | 1.236  | 0.216 | 1.445 | 0.43  | 1.034  | 0.301 | 0.806 | 2.59  |
| CACNA1A   | -0.198 | 0.296 | -0.668 | 0.504 | 0.821 | 0.243 | -0.739 | 0.46  | 0.46  | 1.465 |

|          |        |       |        |       |       |       |        |       |       |       |
|----------|--------|-------|--------|-------|-------|-------|--------|-------|-------|-------|
| CACFD1   | 0.312  | 0.298 | 1.048  | 0.295 | 1.366 | 0.407 | 0.9    | 0.368 | 0.762 | 2.449 |
| CABYR    | -0.44  | 0.311 | -1.412 | 0.158 | 0.644 | 0.201 | -1.773 | 0.076 | 0.35  | 1.186 |
| CABP5    | 0.144  | 0.296 | 0.486  | 0.627 | 1.155 | 0.342 | 0.453  | 0.651 | 0.646 | 2.065 |
| CABP2    | 0.217  | 0.297 | 0.731  | 0.465 | 1.242 | 0.369 | 0.657  | 0.511 | 0.695 | 2.222 |
| CABP1    | -0.087 | 0.297 | -0.295 | 0.768 | 0.916 | 0.272 | -0.308 | 0.758 | 0.512 | 1.639 |
| CABIN1   | -0.813 | 0.311 | -2.61  | 0.009 | 0.444 | 0.138 | -4.027 | 0     | 0.241 | 0.817 |
| CAB39L   | -0.718 | 0.315 | -2.281 | 0.023 | 0.488 | 0.154 | -3.337 | 0.001 | 0.263 | 0.904 |
| CAB39    | -0.459 | 0.3   | -1.531 | 0.126 | 0.632 | 0.189 | -1.942 | 0.052 | 0.351 | 1.137 |
| CAAP1    | 0.227  | 0.297 | 0.763  | 0.445 | 1.255 | 0.373 | 0.683  | 0.495 | 0.701 | 2.246 |
| CA9      | -0.088 | 0.296 | -0.298 | 0.765 | 0.915 | 0.271 | -0.312 | 0.755 | 0.513 | 1.635 |
| CA8      | -0.179 | 0.296 | -0.604 | 0.546 | 0.836 | 0.248 | -0.662 | 0.508 | 0.468 | 1.494 |
| CA7      | -0.151 | 0.295 | -0.511 | 0.609 | 0.86  | 0.254 | -0.551 | 0.581 | 0.482 | 1.534 |
| CA6      | 0.043  | 0.296 | 0.144  | 0.885 | 1.044 | 0.308 | 0.141  | 0.888 | 0.585 | 1.863 |
| CA5BP1   | 0.105  | 0.296 | 0.355  | 0.722 | 1.111 | 0.329 | 0.337  | 0.736 | 0.622 | 1.985 |
| CA5B     | 0.069  | 0.295 | 0.234  | 0.815 | 1.072 | 0.316 | 0.227  | 0.821 | 0.601 | 1.911 |
| CA5A     | 0.065  | 0.295 | 0.222  | 0.825 | 1.068 | 0.315 | 0.215  | 0.83  | 0.599 | 1.904 |
| CA4      | 0.224  | 0.296 | 0.756  | 0.45  | 1.251 | 0.371 | 0.677  | 0.498 | 0.7   | 2.236 |
| CA3      | -0.022 | 0.296 | -0.075 | 0.94  | 0.978 | 0.289 | -0.076 | 0.94  | 0.548 | 1.746 |
| CA2      | 0.028  | 0.295 | 0.096  | 0.924 | 1.029 | 0.304 | 0.095  | 0.925 | 0.577 | 1.835 |
| CA14     | 0.366  | 0.3   | 1.222  | 0.222 | 1.442 | 0.432 | 1.023  | 0.306 | 0.801 | 2.596 |
| CA12     | 0.065  | 0.297 | 0.22   | 0.826 | 1.067 | 0.317 | 0.213  | 0.831 | 0.597 | 1.909 |
| CA11     | 0.113  | 0.296 | 0.38   | 0.704 | 1.119 | 0.331 | 0.36   | 0.719 | 0.627 | 1.998 |
| CA10     | -0.197 | 0.296 | -0.667 | 0.505 | 0.821 | 0.243 | -0.737 | 0.461 | 0.459 | 1.467 |
| CA1      | 0.497  | 0.3   | 1.659  | 0.097 | 1.644 | 0.493 | 1.307  | 0.191 | 0.914 | 2.959 |
| C9orf78  | -0.479 | 0.302 | -1.584 | 0.113 | 0.619 | 0.187 | -2.032 | 0.042 | 0.342 | 1.12  |
| C9orf40  | 0.191  | 0.295 | 0.647  | 0.517 | 1.211 | 0.358 | 0.589  | 0.556 | 0.679 | 2.16  |
| C9orf16  | -0.022 | 0.296 | -0.075 | 0.941 | 0.978 | 0.29  | -0.075 | 0.94  | 0.548 | 1.747 |
| C9orf116 | -0.243 | 0.298 | -0.815 | 0.415 | 0.784 | 0.234 | -0.923 | 0.356 | 0.438 | 1.406 |
| C9       | -0.168 | 0.298 | -0.565 | 0.572 | 0.845 | 0.252 | -0.615 | 0.539 | 0.471 | 1.516 |
| C8orf44  | 0.353  | 0.303 | 1.166  | 0.244 | 1.423 | 0.431 | 0.982  | 0.326 | 0.786 | 2.576 |
| C8orf33  | 0.635  | 0.306 | 2.079  | 0.038 | 1.887 | 0.577 | 1.539  | 0.124 | 1.037 | 3.435 |
| C8orf17  | -0.271 | 0.298 | -0.911 | 0.362 | 0.762 | 0.227 | -1.047 | 0.295 | 0.426 | 1.366 |
| C8G      | 0.45   | 0.3   | 1.5    | 0.134 | 1.568 | 0.471 | 1.208  | 0.227 | 0.871 | 2.824 |
| C8B      | 0.049  | 0.296 | 0.164  | 0.87  | 1.05  | 0.31  | 0.16   | 0.873 | 0.588 | 1.874 |
| C8A      | 0.141  | 0.296 | 0.476  | 0.634 | 1.151 | 0.34  | 0.444  | 0.657 | 0.645 | 2.055 |
| C7orf69  | 0.622  | 0.305 | 2.041  | 0.041 | 1.862 | 0.567 | 1.52   | 0.128 | 1.025 | 3.382 |
| C7orf26  | 0.081  | 0.296 | 0.273  | 0.785 | 1.084 | 0.321 | 0.262  | 0.793 | 0.607 | 1.936 |
| C7       | -0.784 | 0.31  | -2.531 | 0.011 | 0.457 | 0.141 | -3.842 | 0     | 0.249 | 0.838 |

|          |        |       |        |       |       |       |        |       |       |       |
|----------|--------|-------|--------|-------|-------|-------|--------|-------|-------|-------|
| C6orf62  | 0.423  | 0.308 | 1.375  | 0.169 | 1.526 | 0.47  | 1.121  | 0.262 | 0.835 | 2.789 |
| C6orf47  | 0.423  | 0.306 | 1.382  | 0.167 | 1.527 | 0.467 | 1.127  | 0.26  | 0.838 | 2.782 |
| C6orf15  | 0.719  | 0.306 | 2.35   | 0.019 | 2.053 | 0.628 | 1.676  | 0.094 | 1.127 | 3.74  |
| C6orf120 | -0.109 | 0.296 | -0.37  | 0.712 | 0.896 | 0.265 | -0.391 | 0.696 | 0.502 | 1.6   |
| C6       | -0.267 | 0.296 | -0.9   | 0.368 | 0.766 | 0.227 | -1.031 | 0.302 | 0.428 | 1.369 |
| C5orf66  | 0.16   | 0.296 | 0.54   | 0.589 | 1.173 | 0.347 | 0.499  | 0.618 | 0.657 | 2.097 |
| C5orf22  | 0.487  | 0.3   | 1.623  | 0.104 | 1.627 | 0.488 | 1.285  | 0.199 | 0.904 | 2.93  |
| C5orf15  | -0.129 | 0.296 | -0.435 | 0.664 | 0.879 | 0.261 | -0.464 | 0.643 | 0.492 | 1.572 |
| C5AR2    | 0.047  | 0.297 | 0.159  | 0.874 | 1.048 | 0.311 | 0.155  | 0.877 | 0.586 | 1.877 |
| C5AR1    | 0.037  | 0.295 | 0.125  | 0.901 | 1.037 | 0.306 | 0.122  | 0.903 | 0.582 | 1.85  |
| C5       | -0.191 | 0.296 | -0.644 | 0.519 | 0.826 | 0.245 | -0.71  | 0.478 | 0.462 | 1.477 |
| C4orf19  | 0.493  | 0.303 | 1.628  | 0.104 | 1.637 | 0.495 | 1.285  | 0.199 | 0.904 | 2.962 |
| C4BPB    | 0.306  | 0.298 | 1.03   | 0.303 | 1.359 | 0.404 | 0.887  | 0.375 | 0.758 | 2.434 |
| C4BPA    | 0.119  | 0.298 | 0.399  | 0.69  | 1.126 | 0.336 | 0.376  | 0.707 | 0.628 | 2.021 |
| C3orf52  | 0.247  | 0.298 | 0.829  | 0.407 | 1.28  | 0.381 | 0.735  | 0.462 | 0.714 | 2.293 |
| C3orf36  | -0.355 | 0.3   | -1.183 | 0.237 | 0.701 | 0.21  | -1.419 | 0.156 | 0.39  | 1.263 |
| C3orf18  | -0.474 | 0.306 | -1.55  | 0.121 | 0.622 | 0.191 | -1.983 | 0.047 | 0.341 | 1.134 |
| C3orf14  | 0.303  | 0.3   | 1.011  | 0.312 | 1.354 | 0.406 | 0.872  | 0.383 | 0.753 | 2.435 |
| C3AR1    | -0.337 | 0.3   | -1.125 | 0.261 | 0.714 | 0.214 | -1.338 | 0.181 | 0.396 | 1.285 |
| C3       | -1.005 | 0.321 | -3.126 | 0.002 | 0.366 | 0.118 | -5.386 | 0     | 0.195 | 0.687 |
| C2orf83  | 0.174  | 0.297 | 0.585  | 0.559 | 1.19  | 0.353 | 0.537  | 0.591 | 0.665 | 2.129 |
| C2orf72  | 0.042  | 0.297 | 0.141  | 0.888 | 1.043 | 0.31  | 0.138  | 0.891 | 0.582 | 1.867 |
| C2orf68  | -0.39  | 0.3   | -1.302 | 0.193 | 0.677 | 0.203 | -1.592 | 0.111 | 0.376 | 1.218 |
| C2orf49  | 0.499  | 0.301 | 1.656  | 0.098 | 1.647 | 0.496 | 1.304  | 0.192 | 0.913 | 2.971 |
| C2orf42  | -0.294 | 0.3   | -0.98  | 0.327 | 0.745 | 0.223 | -1.14  | 0.254 | 0.414 | 1.341 |
| C2orf27A | 0.45   | 0.302 | 1.488  | 0.137 | 1.568 | 0.474 | 1.198  | 0.231 | 0.867 | 2.836 |
| C2CD5    | -0.328 | 0.303 | -1.085 | 0.278 | 0.72  | 0.218 | -1.284 | 0.199 | 0.398 | 1.303 |
| C2CD3    | 0.51   | 0.306 | 1.668  | 0.095 | 1.665 | 0.509 | 1.306  | 0.191 | 0.914 | 3.033 |
| C2CD2L   | -0.393 | 0.299 | -1.313 | 0.189 | 0.675 | 0.202 | -1.609 | 0.108 | 0.375 | 1.214 |
| C2CD2    | 0.391  | 0.3   | 1.305  | 0.192 | 1.479 | 0.444 | 1.08   | 0.28  | 0.822 | 2.662 |
| C22orf46 | -0.386 | 0.298 | -1.296 | 0.195 | 0.68  | 0.202 | -1.581 | 0.114 | 0.379 | 1.219 |
| C22orf31 | 0.284  | 0.297 | 0.956  | 0.339 | 1.328 | 0.394 | 0.832  | 0.405 | 0.742 | 2.376 |
| C22orf24 | -0.209 | 0.297 | -0.704 | 0.482 | 0.811 | 0.241 | -0.783 | 0.434 | 0.453 | 1.453 |
| C21orf91 | 0.387  | 0.298 | 1.297  | 0.195 | 1.472 | 0.439 | 1.076  | 0.282 | 0.821 | 2.641 |
| C21orf62 | -0.153 | 0.297 | -0.516 | 0.606 | 0.858 | 0.254 | -0.557 | 0.577 | 0.48  | 1.535 |
| C20orf27 | -0.207 | 0.298 | -0.696 | 0.487 | 0.813 | 0.242 | -0.773 | 0.44  | 0.453 | 1.457 |
| C2       | -0.049 | 0.296 | -0.165 | 0.869 | 0.952 | 0.282 | -0.169 | 0.866 | 0.534 | 1.7   |
| C1S      | -0.815 | 0.31  | -2.625 | 0.009 | 0.443 | 0.137 | -4.055 | 0     | 0.241 | 0.813 |

|           |        |       |        |       |       |       |        |       |       |       |
|-----------|--------|-------|--------|-------|-------|-------|--------|-------|-------|-------|
| C1RL      | -0.006 | 0.297 | -0.021 | 0.983 | 0.994 | 0.295 | -0.021 | 0.983 | 0.556 | 1.777 |
| C1R       | -0.853 | 0.311 | -2.745 | 0.006 | 0.426 | 0.132 | -4.334 | 0     | 0.232 | 0.784 |
| C1QTNF3   | -0.524 | 0.302 | -1.733 | 0.083 | 0.592 | 0.179 | -2.279 | 0.023 | 0.327 | 1.071 |
| C1QTNF1   | -0.14  | 0.296 | -0.472 | 0.637 | 0.869 | 0.258 | -0.507 | 0.612 | 0.486 | 1.554 |
| C1QL1     | 0.814  | 0.31  | 2.623  | 0.009 | 2.257 | 0.7   | 1.795  | 0.073 | 1.228 | 4.147 |
| C1QBP     | -0.21  | 0.298 | -0.706 | 0.48  | 0.811 | 0.241 | -0.786 | 0.432 | 0.452 | 1.452 |
| C1QB      | 0.234  | 0.296 | 0.79   | 0.43  | 1.264 | 0.374 | 0.704  | 0.481 | 0.707 | 2.258 |
| C1QA      | 0.222  | 0.296 | 0.75   | 0.453 | 1.248 | 0.369 | 0.673  | 0.501 | 0.699 | 2.228 |
| C1orf68   | 0.651  | 0.31  | 2.101  | 0.036 | 1.918 | 0.594 | 1.544  | 0.123 | 1.045 | 3.521 |
| C1orf56   | -0.143 | 0.296 | -0.484 | 0.629 | 0.866 | 0.257 | -0.52  | 0.603 | 0.485 | 1.549 |
| C1orf54   | -0.655 | 0.306 | -2.141 | 0.032 | 0.519 | 0.159 | -3.025 | 0.002 | 0.285 | 0.946 |
| C1orf50   | 0.381  | 0.298 | 1.278  | 0.201 | 1.464 | 0.437 | 1.063  | 0.288 | 0.816 | 2.627 |
| C1orf35   | 0.737  | 0.31  | 2.38   | 0.017 | 2.09  | 0.647 | 1.684  | 0.092 | 1.139 | 3.834 |
| C1orf216  | -0.152 | 0.296 | -0.512 | 0.609 | 0.859 | 0.255 | -0.553 | 0.58  | 0.481 | 1.536 |
| C1orf21   | -0.403 | 0.302 | -1.332 | 0.183 | 0.669 | 0.202 | -1.64  | 0.101 | 0.37  | 1.209 |
| C1orf174  | 0.568  | 0.306 | 1.859  | 0.063 | 1.764 | 0.539 | 1.418  | 0.156 | 0.97  | 3.211 |
| C1orf159  | -0.273 | 0.298 | -0.914 | 0.361 | 0.761 | 0.227 | -1.051 | 0.293 | 0.424 | 1.366 |
| C1orf116  | 0.524  | 0.303 | 1.732  | 0.083 | 1.689 | 0.511 | 1.348  | 0.178 | 0.933 | 3.057 |
| C1orf115  | -0.229 | 0.296 | -0.772 | 0.44  | 0.796 | 0.235 | -0.868 | 0.385 | 0.446 | 1.421 |
| C1orf112  | 0.183  | 0.295 | 0.621  | 0.534 | 1.201 | 0.355 | 0.568  | 0.57  | 0.673 | 2.143 |
| C1orf109  | 0.116  | 0.297 | 0.391  | 0.696 | 1.123 | 0.333 | 0.369  | 0.712 | 0.628 | 2.008 |
| C1orf105  | 0.18   | 0.296 | 0.607  | 0.544 | 1.197 | 0.355 | 0.556  | 0.578 | 0.67  | 2.141 |
| C1GALT1C1 | 0.007  | 0.295 | 0.025  | 0.98  | 1.007 | 0.298 | 0.025  | 0.98  | 0.565 | 1.798 |
| C1GALT1   | 0.983  | 0.321 | 3.067  | 0.002 | 2.674 | 0.857 | 1.952  | 0.051 | 1.426 | 5.012 |
| C1D       | 0.231  | 0.296 | 0.78   | 0.435 | 1.26  | 0.373 | 0.696  | 0.486 | 0.705 | 2.249 |
| C19orf73  | 0.323  | 0.298 | 1.084  | 0.278 | 1.381 | 0.411 | 0.927  | 0.354 | 0.77  | 2.476 |
| C19orf54  | 0.107  | 0.296 | 0.36   | 0.719 | 1.112 | 0.329 | 0.342  | 0.733 | 0.623 | 1.987 |
| C19orf53  | -0.292 | 0.298 | -0.98  | 0.327 | 0.747 | 0.222 | -1.138 | 0.255 | 0.417 | 1.339 |
| C18orf25  | 0.428  | 0.303 | 1.414  | 0.157 | 1.535 | 0.465 | 1.15   | 0.25  | 0.847 | 2.78  |
| C17orf80  | -0.223 | 0.298 | -0.747 | 0.455 | 0.8   | 0.238 | -0.837 | 0.402 | 0.447 | 1.435 |
| C17orf75  | 0.491  | 0.3   | 1.635  | 0.102 | 1.634 | 0.491 | 1.292  | 0.196 | 0.907 | 2.944 |
| C16orf72  | 0.385  | 0.3   | 1.281  | 0.2   | 1.47  | 0.442 | 1.064  | 0.288 | 0.816 | 2.648 |
| C16orf71  | -0.619 | 0.303 | -2.042 | 0.041 | 0.538 | 0.163 | -2.827 | 0.005 | 0.297 | 0.976 |
| C16orf70  | -0.03  | 0.295 | -0.1   | 0.92  | 0.971 | 0.287 | -0.102 | 0.919 | 0.544 | 1.732 |
| C15orf39  | -0.001 | 0.296 | -0.003 | 0.998 | 0.999 | 0.296 | -0.003 | 0.998 | 0.559 | 1.786 |
| C14orf93  | 0.038  | 0.296 | 0.127  | 0.899 | 1.038 | 0.308 | 0.125  | 0.901 | 0.581 | 1.856 |
| C14orf132 | -0.012 | 0.295 | -0.042 | 0.966 | 0.988 | 0.292 | -0.042 | 0.966 | 0.554 | 1.762 |
| C12orf43  | -0.249 | 0.3   | -0.83  | 0.407 | 0.78  | 0.234 | -0.942 | 0.346 | 0.433 | 1.403 |

|          |        |       |        |       |       |       |        |       |       |       |
|----------|--------|-------|--------|-------|-------|-------|--------|-------|-------|-------|
| C12orf4  | 0.372  | 0.298 | 1.248  | 0.212 | 1.451 | 0.433 | 1.042  | 0.297 | 0.809 | 2.604 |
| C12orf29 | -0.661 | 0.316 | -2.092 | 0.036 | 0.516 | 0.163 | -2.964 | 0.003 | 0.278 | 0.959 |
| C11orf95 | 0.828  | 0.321 | 2.579  | 0.01  | 2.288 | 0.734 | 1.755  | 0.079 | 1.22  | 4.29  |
| C11orf80 | 0.322  | 0.296 | 1.086  | 0.277 | 1.38  | 0.409 | 0.929  | 0.353 | 0.772 | 2.467 |
| C11orf71 | 0.011  | 0.295 | 0.038  | 0.97  | 1.011 | 0.298 | 0.038  | 0.97  | 0.567 | 1.803 |
| C11orf68 | -0.179 | 0.296 | -0.604 | 0.546 | 0.836 | 0.247 | -0.662 | 0.508 | 0.469 | 1.493 |
| C11orf58 | 0.061  | 0.296 | 0.205  | 0.838 | 1.062 | 0.314 | 0.199  | 0.842 | 0.595 | 1.896 |
| C11orf49 | 0.571  | 0.302 | 1.893  | 0.058 | 1.77  | 0.534 | 1.442  | 0.149 | 0.98  | 3.196 |
| C11orf24 | 0.01   | 0.295 | 0.033  | 0.973 | 1.01  | 0.298 | 0.033  | 0.973 | 0.566 | 1.802 |
| C11orf21 | -0.289 | 0.297 | -0.974 | 0.33  | 0.749 | 0.222 | -1.129 | 0.259 | 0.419 | 1.34  |
| C11orf16 | -0.13  | 0.295 | -0.441 | 0.659 | 0.878 | 0.259 | -0.471 | 0.638 | 0.492 | 1.566 |
| C11orf1  | -0.026 | 0.298 | -0.088 | 0.93  | 0.974 | 0.291 | -0.089 | 0.929 | 0.543 | 1.749 |
| C10orf95 | 0.075  | 0.298 | 0.252  | 0.801 | 1.078 | 0.322 | 0.243  | 0.808 | 0.601 | 1.935 |
| C10orf88 | 0.43   | 0.3   | 1.434  | 0.152 | 1.537 | 0.46  | 1.166  | 0.244 | 0.854 | 2.764 |
| BZW2     | 0.761  | 0.31  | 2.455  | 0.014 | 2.139 | 0.663 | 1.719  | 0.086 | 1.166 | 3.927 |
| BZW1     | -0.702 | 0.307 | -2.289 | 0.022 | 0.495 | 0.152 | -3.32  | 0.001 | 0.271 | 0.904 |
| BYSL     | 0.746  | 0.31  | 2.408  | 0.016 | 2.109 | 0.653 | 1.697  | 0.09  | 1.149 | 3.87  |
| BUD31    | 0.232  | 0.299 | 0.777  | 0.437 | 1.262 | 0.377 | 0.694  | 0.488 | 0.702 | 2.266 |
| BUD23    | 0.351  | 0.297 | 1.18   | 0.238 | 1.42  | 0.422 | 0.995  | 0.32  | 0.793 | 2.543 |
| BUB3     | -0.185 | 0.298 | -0.621 | 0.535 | 0.831 | 0.247 | -0.682 | 0.495 | 0.464 | 1.489 |
| BUB1B    | 0.545  | 0.3   | 1.818  | 0.069 | 1.724 | 0.517 | 1.402  | 0.161 | 0.958 | 3.103 |
| BUB1     | 0.795  | 0.315 | 2.526  | 0.012 | 2.215 | 0.697 | 1.742  | 0.081 | 1.195 | 4.106 |
| BTRC     | -0.299 | 0.297 | -1.006 | 0.315 | 0.741 | 0.221 | -1.172 | 0.241 | 0.414 | 1.328 |
| BTNL8    | -0.005 | 0.295 | -0.016 | 0.987 | 0.995 | 0.294 | -0.017 | 0.987 | 0.558 | 1.774 |
| BTNL3    | 0.629  | 0.31  | 2.026  | 0.043 | 1.875 | 0.582 | 1.504  | 0.133 | 1.021 | 3.446 |
| BTNL2    | 0.272  | 0.297 | 0.914  | 0.361 | 1.313 | 0.39  | 0.801  | 0.423 | 0.733 | 2.351 |
| BTN3A3   | -0.512 | 0.3   | -1.706 | 0.088 | 0.599 | 0.18  | -2.228 | 0.026 | 0.333 | 1.079 |
| BTN3A2   | -0.618 | 0.303 | -2.04  | 0.041 | 0.539 | 0.163 | -2.824 | 0.005 | 0.298 | 0.976 |
| BTN3A1   | -0.048 | 0.296 | -0.164 | 0.87  | 0.953 | 0.282 | -0.168 | 0.867 | 0.534 | 1.701 |
| BTN2A3P  | 0.12   | 0.296 | 0.407  | 0.684 | 1.128 | 0.333 | 0.383  | 0.701 | 0.632 | 2.013 |
| BTN2A2   | 0.534  | 0.303 | 1.764  | 0.078 | 1.707 | 0.517 | 1.367  | 0.172 | 0.942 | 3.09  |
| BTN2A1   | 0.278  | 0.3   | 0.927  | 0.354 | 1.321 | 0.397 | 0.809  | 0.418 | 0.733 | 2.38  |
| BTN1A1   | -0.162 | 0.296 | -0.547 | 0.584 | 0.851 | 0.252 | -0.594 | 0.553 | 0.476 | 1.519 |
| BTK      | -0.284 | 0.298 | -0.954 | 0.34  | 0.753 | 0.224 | -1.103 | 0.27  | 0.42  | 1.349 |
| BTG4     | 0.46   | 0.3   | 1.533  | 0.125 | 1.584 | 0.475 | 1.229  | 0.219 | 0.88  | 2.851 |
| BTG3     | 0.143  | 0.295 | 0.485  | 0.628 | 1.154 | 0.341 | 0.452  | 0.652 | 0.647 | 2.058 |
| BTG2     | -0.591 | 0.303 | -1.95  | 0.051 | 0.554 | 0.168 | -2.658 | 0.008 | 0.306 | 1.003 |
| BTG1     | -0.35  | 0.297 | -1.177 | 0.239 | 0.705 | 0.209 | -1.409 | 0.159 | 0.394 | 1.262 |

|         |        |       |        |       |       |       |        |       |       |       |
|---------|--------|-------|--------|-------|-------|-------|--------|-------|-------|-------|
| BTF3P11 | 0.523  | 0.303 | 1.726  | 0.084 | 1.687 | 0.511 | 1.344  | 0.179 | 0.932 | 3.054 |
| BTF3    | -0.592 | 0.317 | -1.864 | 0.062 | 0.553 | 0.176 | -2.543 | 0.011 | 0.297 | 1.031 |
| BTD     | -0.885 | 0.321 | -2.758 | 0.006 | 0.413 | 0.132 | -4.435 | 0     | 0.22  | 0.774 |
| BTC     | 0.024  | 0.295 | 0.083  | 0.934 | 1.025 | 0.302 | 0.082  | 0.935 | 0.575 | 1.827 |
| BTBD7   | 0.076  | 0.296 | 0.256  | 0.798 | 1.079 | 0.319 | 0.247  | 0.805 | 0.604 | 1.927 |
| BTBD3   | 0.381  | 0.3   | 1.267  | 0.205 | 1.463 | 0.439 | 1.054  | 0.292 | 0.812 | 2.636 |
| BTBD2   | -0.269 | 0.301 | -0.894 | 0.371 | 0.764 | 0.23  | -1.026 | 0.305 | 0.423 | 1.379 |
| BTBD18  | -0.033 | 0.295 | -0.113 | 0.91  | 0.967 | 0.286 | -0.115 | 0.908 | 0.542 | 1.725 |
| BTBD1   | -0.598 | 0.311 | -1.922 | 0.055 | 0.55  | 0.171 | -2.63  | 0.009 | 0.299 | 1.012 |
| BTAf1   | -0.483 | 0.301 | -1.607 | 0.108 | 0.617 | 0.185 | -2.065 | 0.039 | 0.342 | 1.112 |
| BST2    | 0.136  | 0.296 | 0.459  | 0.646 | 1.146 | 0.339 | 0.43   | 0.668 | 0.642 | 2.045 |
| BST1    | -0.305 | 0.303 | -1.004 | 0.315 | 0.737 | 0.224 | -1.174 | 0.24  | 0.407 | 1.336 |
| BSPRY   | -0.406 | 0.303 | -1.34  | 0.18  | 0.666 | 0.202 | -1.654 | 0.098 | 0.368 | 1.207 |
| BSN     | 0.077  | 0.295 | 0.261  | 0.794 | 1.08  | 0.319 | 0.251  | 0.802 | 0.606 | 1.925 |
| BSG     | -0.405 | 0.302 | -1.34  | 0.18  | 0.667 | 0.202 | -1.651 | 0.099 | 0.369 | 1.206 |
| BSDC1   | -0.464 | 0.301 | -1.545 | 0.122 | 0.628 | 0.189 | -1.966 | 0.049 | 0.349 | 1.133 |
| BRWD1   | 0.497  | 0.301 | 1.653  | 0.098 | 1.643 | 0.494 | 1.303  | 0.193 | 0.912 | 2.961 |
| BRSK2   | 0.394  | 0.3   | 1.314  | 0.189 | 1.482 | 0.444 | 1.086  | 0.277 | 0.824 | 2.666 |
| BRS3    | -0.216 | 0.296 | -0.729 | 0.466 | 0.806 | 0.239 | -0.814 | 0.416 | 0.451 | 1.44  |
| BRPF1   | 0.472  | 0.303 | 1.56   | 0.119 | 1.604 | 0.486 | 1.243  | 0.214 | 0.886 | 2.903 |
| BRMS1   | 0.075  | 0.295 | 0.253  | 0.8   | 1.078 | 0.318 | 0.244  | 0.807 | 0.604 | 1.922 |
| BRME1   | 0.81   | 0.315 | 2.573  | 0.01  | 2.247 | 0.707 | 1.763  | 0.078 | 1.213 | 4.164 |
| BRIX1   | 0.663  | 0.304 | 2.184  | 0.029 | 1.941 | 0.59  | 1.596  | 0.11  | 1.07  | 3.52  |
| BRIP1   | 0.282  | 0.298 | 0.949  | 0.343 | 1.326 | 0.395 | 0.827  | 0.408 | 0.74  | 2.376 |
| BRINP3  | 0.646  | 0.31  | 2.085  | 0.037 | 1.908 | 0.591 | 1.536  | 0.125 | 1.04  | 3.502 |
| BRINP2  | -0.486 | 0.302 | -1.608 | 0.108 | 0.615 | 0.186 | -2.071 | 0.038 | 0.34  | 1.112 |
| BRINP1  | 0.24   | 0.298 | 0.807  | 0.42  | 1.271 | 0.378 | 0.717  | 0.473 | 0.71  | 2.278 |
| BRF2    | -0.245 | 0.3   | -0.817 | 0.414 | 0.783 | 0.235 | -0.925 | 0.355 | 0.435 | 1.409 |
| BRF1    | -0.183 | 0.296 | -0.617 | 0.537 | 0.833 | 0.247 | -0.677 | 0.498 | 0.466 | 1.489 |
| BRDT    | 0.151  | 0.296 | 0.509  | 0.611 | 1.163 | 0.344 | 0.473  | 0.636 | 0.651 | 2.077 |
| BRD9    | 0.015  | 0.296 | 0.051  | 0.959 | 1.015 | 0.3   | 0.051  | 0.959 | 0.569 | 1.812 |
| BRD8    | -0.199 | 0.296 | -0.672 | 0.502 | 0.82  | 0.243 | -0.743 | 0.457 | 0.459 | 1.465 |
| BRD7P3  | 0.538  | 0.304 | 1.773  | 0.076 | 1.713 | 0.52  | 1.371  | 0.17  | 0.945 | 3.106 |
| BRD7    | 0.851  | 0.315 | 2.702  | 0.007 | 2.342 | 0.738 | 1.819  | 0.069 | 1.263 | 4.343 |
| BRD4    | 0.025  | 0.295 | 0.085  | 0.932 | 1.026 | 0.303 | 0.084  | 0.933 | 0.575 | 1.83  |
| BRD3OS  | 0.193  | 0.296 | 0.653  | 0.514 | 1.213 | 0.36  | 0.593  | 0.553 | 0.679 | 2.169 |
| BRD3    | -0.114 | 0.295 | -0.386 | 0.7   | 0.892 | 0.264 | -0.409 | 0.683 | 0.5   | 1.592 |
| BRD2    | 0.634  | 0.31  | 2.044  | 0.041 | 1.885 | 0.585 | 1.514  | 0.13  | 1.027 | 3.462 |



|        |        |       |        |       |       |       |        |       |       |       |
|--------|--------|-------|--------|-------|-------|-------|--------|-------|-------|-------|
| BRD1   | -0.353 | 0.298 | -1.184 | 0.236 | 0.702 | 0.209 | -1.421 | 0.155 | 0.391 | 1.26  |
| BRCC3  | 0.287  | 0.298 | 0.965  | 0.335 | 1.333 | 0.397 | 0.839  | 0.402 | 0.744 | 2.388 |
| BRCA2  | 0.501  | 0.302 | 1.656  | 0.098 | 1.65  | 0.499 | 1.303  | 0.193 | 0.912 | 2.985 |
| BRCA1  | 0.249  | 0.296 | 0.84   | 0.401 | 1.283 | 0.38  | 0.744  | 0.457 | 0.718 | 2.291 |
| BRAP   | -0.419 | 0.307 | -1.363 | 0.173 | 0.658 | 0.202 | -1.692 | 0.091 | 0.36  | 1.201 |
| BPY2   | 0.19   | 0.295 | 0.642  | 0.521 | 1.209 | 0.357 | 0.585  | 0.559 | 0.677 | 2.157 |
| BPTF   | -0.206 | 0.297 | -0.692 | 0.489 | 0.814 | 0.242 | -0.768 | 0.442 | 0.455 | 1.458 |
| BPNT2  | 0.025  | 0.295 | 0.085  | 0.932 | 1.026 | 0.303 | 0.084  | 0.933 | 0.575 | 1.828 |
| BPNT1  | -0.195 | 0.296 | -0.657 | 0.511 | 0.823 | 0.244 | -0.726 | 0.468 | 0.461 | 1.471 |
| BPIFA1 | -0.174 | 0.296 | -0.588 | 0.557 | 0.84  | 0.249 | -0.642 | 0.521 | 0.47  | 1.501 |
| BPHL   | 0.008  | 0.295 | 0.027  | 0.979 | 1.008 | 0.298 | 0.027  | 0.979 | 0.565 | 1.798 |
| BPGM   | -0.323 | 0.298 | -1.085 | 0.278 | 0.724 | 0.216 | -1.281 | 0.2   | 0.404 | 1.298 |
| BPESC1 | 0.077  | 0.296 | 0.261  | 0.794 | 1.08  | 0.319 | 0.252  | 0.801 | 0.605 | 1.928 |
| BORCS8 | 0.671  | 0.304 | 2.208  | 0.027 | 1.956 | 0.594 | 1.608  | 0.108 | 1.078 | 3.548 |
| BORCS6 | -0.129 | 0.299 | -0.431 | 0.666 | 0.879 | 0.263 | -0.46  | 0.645 | 0.489 | 1.58  |
| BORA   | 0.715  | 0.31  | 2.309  | 0.021 | 2.045 | 0.633 | 1.649  | 0.099 | 1.114 | 3.753 |
| BOLA1  | 0.146  | 0.295 | 0.496  | 0.62  | 1.158 | 0.342 | 0.461  | 0.645 | 0.649 | 2.066 |
| BNIP3L | -0.674 | 0.31  | -2.178 | 0.029 | 0.509 | 0.158 | -3.109 | 0.002 | 0.278 | 0.935 |
| BNIP3  | 0.502  | 0.3   | 1.674  | 0.094 | 1.652 | 0.495 | 1.316  | 0.188 | 0.918 | 2.974 |
| BNIP2  | 0.478  | 0.3   | 1.595  | 0.111 | 1.613 | 0.484 | 1.268  | 0.205 | 0.896 | 2.904 |
| BNIP1  | -0.065 | 0.295 | -0.22  | 0.826 | 0.937 | 0.277 | -0.228 | 0.82  | 0.525 | 1.671 |
| BNC2   | -0.352 | 0.298 | -1.183 | 0.237 | 0.703 | 0.209 | -1.418 | 0.156 | 0.392 | 1.26  |
| BNC1   | -0.307 | 0.298 | -1.033 | 0.302 | 0.735 | 0.219 | -1.209 | 0.227 | 0.41  | 1.318 |
| BMX    | -0.247 | 0.297 | -0.833 | 0.405 | 0.781 | 0.232 | -0.945 | 0.344 | 0.436 | 1.397 |
| BMS1   | 0.811  | 0.322 | 2.515  | 0.012 | 2.249 | 0.725 | 1.723  | 0.085 | 1.196 | 4.231 |
| BMPR2  | 0.402  | 0.307 | 1.312  | 0.189 | 1.495 | 0.459 | 1.08   | 0.28  | 0.82  | 2.727 |
| BMPR1B | 0.013  | 0.296 | 0.044  | 0.965 | 1.013 | 0.3   | 0.044  | 0.965 | 0.568 | 1.809 |
| BMPR1A | 0.398  | 0.3   | 1.328  | 0.184 | 1.489 | 0.446 | 1.096  | 0.273 | 0.828 | 2.678 |
| BMP8B  | -0.382 | 0.3   | -1.274 | 0.203 | 0.683 | 0.205 | -1.551 | 0.121 | 0.379 | 1.228 |
| BMP8A  | 0.201  | 0.298 | 0.674  | 0.5   | 1.223 | 0.364 | 0.611  | 0.541 | 0.682 | 2.192 |
| BMP7   | 0.404  | 0.303 | 1.334  | 0.182 | 1.498 | 0.453 | 1.098  | 0.272 | 0.827 | 2.711 |
| BMP6   | -0.227 | 0.297 | -0.766 | 0.444 | 0.797 | 0.236 | -0.86  | 0.39  | 0.446 | 1.425 |
| BMP5   | -0.253 | 0.297 | -0.853 | 0.394 | 0.776 | 0.23  | -0.97  | 0.332 | 0.434 | 1.389 |
| BMP4   | -0.701 | 0.306 | -2.291 | 0.022 | 0.496 | 0.152 | -3.32  | 0.001 | 0.272 | 0.904 |
| BMP3   | -0.487 | 0.303 | -1.611 | 0.107 | 0.614 | 0.186 | -2.075 | 0.038 | 0.34  | 1.112 |
| BMP2K  | -0.091 | 0.296 | -0.306 | 0.76  | 0.913 | 0.271 | -0.32  | 0.749 | 0.511 | 1.633 |
| BMP2   | 0.341  | 0.3   | 1.138  | 0.255 | 1.406 | 0.421 | 0.964  | 0.335 | 0.782 | 2.53  |
| BMP15  | -0.117 | 0.295 | -0.394 | 0.693 | 0.89  | 0.263 | -0.418 | 0.676 | 0.499 | 1.588 |

|          |        |       |        |       |       |       |        |       |       |       |
|----------|--------|-------|--------|-------|-------|-------|--------|-------|-------|-------|
| BMP10    | 0.185  | 0.296 | 0.626  | 0.531 | 1.204 | 0.357 | 0.571  | 0.568 | 0.673 | 2.151 |
| BMP1     | -0.136 | 0.296 | -0.459 | 0.646 | 0.873 | 0.259 | -0.492 | 0.623 | 0.488 | 1.56  |
| BMERB1   | -0.185 | 0.296 | -0.624 | 0.532 | 0.831 | 0.246 | -0.686 | 0.493 | 0.465 | 1.485 |
| BLZF1    | 0.203  | 0.296 | 0.685  | 0.493 | 1.225 | 0.363 | 0.62   | 0.535 | 0.686 | 2.188 |
| BLVRB    | 0.425  | 0.298 | 1.426  | 0.154 | 1.53  | 0.456 | 1.162  | 0.245 | 0.853 | 2.744 |
| BLVRA    | 0.709  | 0.306 | 2.313  | 0.021 | 2.031 | 0.622 | 1.657  | 0.097 | 1.114 | 3.702 |
| BLOC1S1  | -0.149 | 0.299 | -0.5   | 0.617 | 0.861 | 0.257 | -0.54  | 0.589 | 0.48  | 1.546 |
| BLNK     | -0.154 | 0.295 | -0.522 | 0.602 | 0.857 | 0.253 | -0.565 | 0.572 | 0.48  | 1.529 |
| BLMH     | -0.263 | 0.298 | -0.883 | 0.377 | 0.769 | 0.229 | -1.01  | 0.313 | 0.429 | 1.378 |
| BLM      | 0.436  | 0.303 | 1.439  | 0.15  | 1.547 | 0.469 | 1.166  | 0.244 | 0.854 | 2.801 |
| BLK      | -0.187 | 0.297 | -0.63  | 0.529 | 0.829 | 0.246 | -0.692 | 0.489 | 0.463 | 1.485 |
| BLCAP    | -0.085 | 0.296 | -0.288 | 0.774 | 0.918 | 0.272 | -0.3   | 0.764 | 0.514 | 1.641 |
| BIRC7    | 0.506  | 0.3   | 1.688  | 0.091 | 1.659 | 0.497 | 1.325  | 0.185 | 0.922 | 2.985 |
| BIRC5    | 0.685  | 0.306 | 2.243  | 0.025 | 1.985 | 0.606 | 1.623  | 0.105 | 1.09  | 3.612 |
| BIRC3    | 0.02   | 0.296 | 0.069  | 0.945 | 1.021 | 0.302 | 0.068  | 0.946 | 0.572 | 1.821 |
| BIRC2    | 0.13   | 0.295 | 0.439  | 0.661 | 1.138 | 0.336 | 0.412  | 0.681 | 0.638 | 2.031 |
| BIN3-IT1 | 0.018  | 0.295 | 0.062  | 0.95  | 1.019 | 0.301 | 0.062  | 0.951 | 0.571 | 1.816 |
| BIN3     | -0.437 | 0.303 | -1.443 | 0.149 | 0.646 | 0.196 | -1.81  | 0.07  | 0.357 | 1.169 |
| BIN2     | -0.185 | 0.296 | -0.626 | 0.532 | 0.831 | 0.246 | -0.687 | 0.492 | 0.465 | 1.485 |
| BIN1     | -0.402 | 0.3   | -1.342 | 0.18  | 0.669 | 0.2   | -1.651 | 0.099 | 0.372 | 1.204 |
| BIK      | -0.243 | 0.298 | -0.817 | 0.414 | 0.784 | 0.233 | -0.924 | 0.355 | 0.438 | 1.405 |
| BID      | 0.654  | 0.306 | 2.14   | 0.032 | 1.924 | 0.588 | 1.571  | 0.116 | 1.057 | 3.503 |
| BICRAL   | 0.007  | 0.295 | 0.024  | 0.981 | 1.007 | 0.297 | 0.024  | 0.981 | 0.565 | 1.797 |
| BICRA    | -0.054 | 0.295 | -0.183 | 0.854 | 0.947 | 0.28  | -0.188 | 0.851 | 0.531 | 1.69  |
| BICDL1   | -0.609 | 0.307 | -1.982 | 0.047 | 0.544 | 0.167 | -2.729 | 0.006 | 0.298 | 0.993 |
| BICD2    | -0.382 | 0.299 | -1.279 | 0.201 | 0.682 | 0.204 | -1.558 | 0.119 | 0.38  | 1.226 |
| BICD1    | 0.241  | 0.298 | 0.809  | 0.418 | 1.273 | 0.379 | 0.719  | 0.472 | 0.71  | 2.282 |
| BICC1    | -0.706 | 0.304 | -2.319 | 0.02  | 0.494 | 0.15  | -3.369 | 0.001 | 0.272 | 0.897 |
| BHMT2    | 0.005  | 0.295 | 0.015  | 0.988 | 1.005 | 0.296 | 0.015  | 0.988 | 0.563 | 1.791 |
| BHMT     | -0.54  | 0.303 | -1.784 | 0.074 | 0.583 | 0.176 | -2.365 | 0.018 | 0.322 | 1.055 |
| BHLHE41  | -0.366 | 0.3   | -1.22  | 0.222 | 0.694 | 0.208 | -1.473 | 0.141 | 0.386 | 1.248 |
| BHLHE40  | -0.443 | 0.302 | -1.464 | 0.143 | 0.642 | 0.194 | -1.842 | 0.065 | 0.355 | 1.162 |
| BHLHB9   | 0.328  | 0.299 | 1.098  | 0.272 | 1.388 | 0.415 | 0.936  | 0.349 | 0.773 | 2.493 |
| BGN      | -0.364 | 0.296 | -1.228 | 0.22  | 0.695 | 0.206 | -1.481 | 0.139 | 0.389 | 1.242 |
| BFSP2    | -0.081 | 0.295 | -0.275 | 0.784 | 0.922 | 0.272 | -0.286 | 0.775 | 0.517 | 1.645 |
| BFSP1    | 0.567  | 0.303 | 1.873  | 0.061 | 1.763 | 0.534 | 1.43   | 0.153 | 0.974 | 3.191 |
| BFAR     | 0.217  | 0.296 | 0.732  | 0.464 | 1.242 | 0.368 | 0.658  | 0.511 | 0.695 | 2.219 |
| BEX4     | 0.26   | 0.297 | 0.876  | 0.381 | 1.298 | 0.386 | 0.771  | 0.441 | 0.724 | 2.324 |

|         |        |       |        |       |       |       |        |       |       |       |
|---------|--------|-------|--------|-------|-------|-------|--------|-------|-------|-------|
| BEX3    | 0.588  | 0.306 | 1.921  | 0.055 | 1.801 | 0.551 | 1.452  | 0.146 | 0.988 | 3.281 |
| BEX1    | 0.253  | 0.296 | 0.853  | 0.394 | 1.288 | 0.382 | 0.754  | 0.451 | 0.72  | 2.301 |
| BET1L   | -0.548 | 0.31  | -1.765 | 0.077 | 0.578 | 0.179 | -2.351 | 0.019 | 0.315 | 1.062 |
| BET1    | -0.138 | 0.296 | -0.468 | 0.639 | 0.871 | 0.257 | -0.502 | 0.615 | 0.488 | 1.554 |
| BEST2   | 0.309  | 0.298 | 1.037  | 0.3   | 1.362 | 0.405 | 0.893  | 0.372 | 0.76  | 2.441 |
| BEST1   | -0.417 | 0.303 | -1.375 | 0.169 | 0.659 | 0.2   | -1.706 | 0.088 | 0.364 | 1.194 |
| BEND5   | -0.336 | 0.3   | -1.12  | 0.263 | 0.714 | 0.215 | -1.332 | 0.183 | 0.396 | 1.287 |
| BEGAIN  | 0.036  | 0.297 | 0.122  | 0.903 | 1.037 | 0.308 | 0.12   | 0.905 | 0.58  | 1.854 |
| BECN1   | -0.425 | 0.303 | -1.402 | 0.161 | 0.654 | 0.198 | -1.747 | 0.081 | 0.361 | 1.184 |
| BEAN1   | -0.518 | 0.303 | -1.713 | 0.087 | 0.596 | 0.18  | -2.244 | 0.025 | 0.329 | 1.078 |
| BDNF    | 0.07   | 0.295 | 0.237  | 0.813 | 1.073 | 0.317 | 0.229  | 0.819 | 0.601 | 1.914 |
| BDKRB2  | -0.089 | 0.296 | -0.3   | 0.764 | 0.915 | 0.271 | -0.314 | 0.753 | 0.512 | 1.635 |
| BDKRB1  | 0.671  | 0.306 | 2.191  | 0.028 | 1.955 | 0.598 | 1.597  | 0.11  | 1.073 | 3.562 |
| BDH2    | -0.391 | 0.3   | -1.305 | 0.192 | 0.676 | 0.203 | -1.596 | 0.11  | 0.376 | 1.217 |
| BDH1    | -0.129 | 0.298 | -0.434 | 0.664 | 0.879 | 0.262 | -0.463 | 0.643 | 0.49  | 1.575 |
| BCS1L   | 0.064  | 0.299 | 0.216  | 0.829 | 1.067 | 0.318 | 0.209  | 0.834 | 0.594 | 1.915 |
| BCR     | 0.166  | 0.299 | 0.556  | 0.578 | 1.181 | 0.353 | 0.512  | 0.609 | 0.657 | 2.123 |
| BCORL1  | 0.692  | 0.31  | 2.232  | 0.026 | 1.997 | 0.619 | 1.611  | 0.107 | 1.088 | 3.666 |
| BCOR    | -0.062 | 0.295 | -0.208 | 0.835 | 0.94  | 0.278 | -0.215 | 0.83  | 0.527 | 1.678 |
| BCO1    | 0.099  | 0.299 | 0.331  | 0.74  | 1.104 | 0.33  | 0.315  | 0.753 | 0.614 | 1.984 |
| BCLAF1  | -0.455 | 0.3   | -1.519 | 0.129 | 0.634 | 0.19  | -1.923 | 0.054 | 0.353 | 1.141 |
| BCL9    | -0.065 | 0.295 | -0.221 | 0.825 | 0.937 | 0.277 | -0.228 | 0.819 | 0.525 | 1.671 |
| BCL7C   | 0.069  | 0.296 | 0.233  | 0.816 | 1.071 | 0.317 | 0.225  | 0.822 | 0.6   | 1.913 |
| BCL7B   | 0.152  | 0.297 | 0.512  | 0.609 | 1.164 | 0.346 | 0.475  | 0.635 | 0.651 | 2.083 |
| BCL7A   | -0.032 | 0.295 | -0.11  | 0.913 | 0.968 | 0.286 | -0.112 | 0.911 | 0.543 | 1.727 |
| BCL6    | -0.281 | 0.298 | -0.943 | 0.346 | 0.755 | 0.225 | -1.089 | 0.276 | 0.421 | 1.354 |
| BCL2L2  | -0.08  | 0.296 | -0.272 | 0.786 | 0.923 | 0.273 | -0.283 | 0.777 | 0.517 | 1.648 |
| BCL2L14 | -0.34  | 0.299 | -1.138 | 0.255 | 0.712 | 0.213 | -1.355 | 0.175 | 0.396 | 1.278 |
| BCL2L13 | -0.231 | 0.297 | -0.779 | 0.436 | 0.794 | 0.236 | -0.876 | 0.381 | 0.444 | 1.42  |
| BCL2L11 | 0.477  | 0.3   | 1.589  | 0.112 | 1.611 | 0.483 | 1.264  | 0.206 | 0.895 | 2.9   |
| BCL2L10 | 0.019  | 0.296 | 0.066  | 0.948 | 1.02  | 0.302 | 0.065  | 0.948 | 0.571 | 1.822 |
| BCL2L1  | -0.246 | 0.296 | -0.83  | 0.407 | 0.782 | 0.232 | -0.941 | 0.347 | 0.437 | 1.398 |
| BCL2A1  | 0.109  | 0.296 | 0.367  | 0.714 | 1.115 | 0.33  | 0.348  | 0.728 | 0.624 | 1.99  |
| BCL2    | -0.393 | 0.308 | -1.279 | 0.201 | 0.675 | 0.208 | -1.567 | 0.117 | 0.369 | 1.233 |
| BCL11B  | -0.218 | 0.296 | -0.734 | 0.463 | 0.804 | 0.238 | -0.821 | 0.412 | 0.45  | 1.438 |
| BCL11A  | 0.323  | 0.3   | 1.077  | 0.282 | 1.381 | 0.414 | 0.92   | 0.357 | 0.767 | 2.485 |
| BCL10   | 0.241  | 0.299 | 0.807  | 0.419 | 1.273 | 0.38  | 0.717  | 0.473 | 0.709 | 2.286 |
| BCKDK   | 0.107  | 0.296 | 0.36   | 0.719 | 1.113 | 0.329 | 0.342  | 0.733 | 0.623 | 1.988 |

|        |        |       |        |       |       |       |        |       |       |       |
|--------|--------|-------|--------|-------|-------|-------|--------|-------|-------|-------|
| BCKDHB | 0.256  | 0.297 | 0.864  | 0.388 | 1.292 | 0.383 | 0.762  | 0.446 | 0.722 | 2.31  |
| BCKDHA | 0.223  | 0.298 | 0.749  | 0.454 | 1.25  | 0.373 | 0.671  | 0.502 | 0.697 | 2.243 |
| BCHE   | -0.482 | 0.306 | -1.576 | 0.115 | 0.617 | 0.189 | -2.025 | 0.043 | 0.339 | 1.125 |
| BCCIP  | 0.177  | 0.296 | 0.598  | 0.55  | 1.194 | 0.354 | 0.548  | 0.584 | 0.668 | 2.134 |
| BCAT2  | 0.07   | 0.299 | 0.236  | 0.814 | 1.073 | 0.32  | 0.228  | 0.82  | 0.598 | 1.926 |
| BCAT1  | 0.676  | 0.306 | 2.211  | 0.027 | 1.967 | 0.602 | 1.607  | 0.108 | 1.08  | 3.582 |
| BCAS4  | -0.114 | 0.296 | -0.386 | 0.7   | 0.892 | 0.264 | -0.409 | 0.683 | 0.499 | 1.594 |
| BCAS3  | 0.043  | 0.295 | 0.147  | 0.883 | 1.044 | 0.308 | 0.144  | 0.886 | 0.585 | 1.863 |
| BCAS2  | 0.305  | 0.297 | 1.026  | 0.305 | 1.357 | 0.404 | 0.884  | 0.377 | 0.757 | 2.431 |
| BCAS1  | 0.523  | 0.303 | 1.725  | 0.084 | 1.687 | 0.511 | 1.344  | 0.179 | 0.931 | 3.055 |
| BCAR3  | 0.031  | 0.298 | 0.104  | 0.917 | 1.031 | 0.307 | 0.102  | 0.919 | 0.576 | 1.848 |
| BCAP31 | 0.197  | 0.295 | 0.666  | 0.505 | 1.217 | 0.36  | 0.605  | 0.545 | 0.682 | 2.172 |
| BCAP29 | 0.057  | 0.296 | 0.191  | 0.849 | 1.058 | 0.314 | 0.186  | 0.853 | 0.592 | 1.892 |
| BCAN   | 0.448  | 0.3   | 1.495  | 0.135 | 1.565 | 0.469 | 1.205  | 0.228 | 0.87  | 2.816 |
| BCAM   | -0.469 | 0.3   | -1.567 | 0.117 | 0.625 | 0.187 | -2     | 0.046 | 0.348 | 1.125 |
| BBX    | 0.374  | 0.3   | 1.249  | 0.212 | 1.454 | 0.435 | 1.042  | 0.297 | 0.808 | 2.615 |
| BBS9   | 0.177  | 0.297 | 0.596  | 0.551 | 1.193 | 0.354 | 0.546  | 0.585 | 0.667 | 2.134 |
| BBS7   | 0.71   | 0.307 | 2.317  | 0.02  | 2.035 | 0.624 | 1.659  | 0.097 | 1.116 | 3.711 |
| BBS4   | -0.486 | 0.306 | -1.588 | 0.112 | 0.615 | 0.188 | -2.045 | 0.041 | 0.338 | 1.12  |
| BBS10  | -0.202 | 0.296 | -0.68  | 0.496 | 0.817 | 0.242 | -0.754 | 0.451 | 0.457 | 1.461 |
| BBS1   | -0.427 | 0.303 | -1.412 | 0.158 | 0.652 | 0.197 | -1.762 | 0.078 | 0.36  | 1.18  |
| BBOX1  | -0.082 | 0.295 | -0.276 | 0.782 | 0.922 | 0.272 | -0.288 | 0.773 | 0.517 | 1.644 |
| BBOF1  | -0.664 | 0.31  | -2.142 | 0.032 | 0.515 | 0.16  | -3.039 | 0.002 | 0.281 | 0.945 |
| BBIP1  | -0.991 | 0.321 | -3.084 | 0.002 | 0.371 | 0.119 | -5.273 | 0     | 0.198 | 0.697 |
| BAZ2B  | -0.564 | 0.303 | -1.863 | 0.063 | 0.569 | 0.172 | -2.502 | 0.012 | 0.315 | 1.03  |
| BAZ2A  | 0.098  | 0.295 | 0.332  | 0.74  | 1.103 | 0.326 | 0.316  | 0.752 | 0.618 | 1.967 |
| BAZ1B  | 0.718  | 0.307 | 2.337  | 0.019 | 2.05  | 0.63  | 1.667  | 0.095 | 1.123 | 3.743 |
| BAZ1A  | -0.542 | 0.301 | -1.802 | 0.072 | 0.582 | 0.175 | -2.391 | 0.017 | 0.322 | 1.049 |
| BAX    | 0.575  | 0.301 | 1.91   | 0.056 | 1.778 | 0.535 | 1.453  | 0.146 | 0.985 | 3.208 |
| BATF3  | -0.56  | 0.306 | -1.833 | 0.067 | 0.571 | 0.175 | -2.457 | 0.014 | 0.314 | 1.04  |
| BATF   | -0.376 | 0.3   | -1.256 | 0.209 | 0.686 | 0.206 | -1.525 | 0.127 | 0.381 | 1.235 |
| BASP1  | -0.031 | 0.295 | -0.104 | 0.917 | 0.97  | 0.286 | -0.105 | 0.916 | 0.544 | 1.729 |
| BARX2  | 0.814  | 0.311 | 2.619  | 0.009 | 2.256 | 0.701 | 1.792  | 0.073 | 1.227 | 4.149 |
| BARX1  | -0.482 | 0.302 | -1.595 | 0.111 | 0.617 | 0.187 | -2.05  | 0.04  | 0.341 | 1.116 |
| BARD1  | -0.14  | 0.298 | -0.47  | 0.638 | 0.869 | 0.259 | -0.504 | 0.614 | 0.485 | 1.558 |
| BAP1   | -0.126 | 0.296 | -0.426 | 0.67  | 0.881 | 0.261 | -0.455 | 0.649 | 0.493 | 1.575 |
| BANP   | 0.53   | 0.303 | 1.752  | 0.08  | 1.699 | 0.514 | 1.36   | 0.174 | 0.939 | 3.075 |
| BANK1  | -0.445 | 0.3   | -1.482 | 0.138 | 0.641 | 0.192 | -1.866 | 0.062 | 0.356 | 1.154 |

|          |        |       |        |       |       |       |        |       |       |       |
|----------|--------|-------|--------|-------|-------|-------|--------|-------|-------|-------|
| BANF1    | 0.449  | 0.3   | 1.497  | 0.135 | 1.567 | 0.471 | 1.205  | 0.228 | 0.87  | 2.823 |
| BAMBI    | 0.118  | 0.296 | 0.4    | 0.689 | 1.126 | 0.334 | 0.377  | 0.706 | 0.63  | 2.012 |
| BAK1     | 0.353  | 0.298 | 1.186  | 0.236 | 1.424 | 0.424 | 0.999  | 0.318 | 0.794 | 2.552 |
| BAIAP3   | -0.566 | 0.306 | -1.853 | 0.064 | 0.568 | 0.173 | -2.493 | 0.013 | 0.312 | 1.033 |
| BAIAP2L2 | -0.035 | 0.295 | -0.118 | 0.906 | 0.966 | 0.285 | -0.12  | 0.904 | 0.541 | 1.723 |
| BAIAP2   | -0.07  | 0.295 | -0.236 | 0.813 | 0.933 | 0.275 | -0.244 | 0.807 | 0.523 | 1.664 |
| BAHD1    | -0.431 | 0.302 | -1.428 | 0.153 | 0.65  | 0.196 | -1.785 | 0.074 | 0.359 | 1.175 |
| BAHCC1   | -0.119 | 0.295 | -0.402 | 0.688 | 0.888 | 0.262 | -0.426 | 0.67  | 0.498 | 1.584 |
| BAGE     | -0.4   | 0.3   | -1.333 | 0.183 | 0.671 | 0.201 | -1.638 | 0.101 | 0.372 | 1.207 |
| BAG6     | 0.483  | 0.301 | 1.605  | 0.108 | 1.621 | 0.488 | 1.273  | 0.203 | 0.899 | 2.925 |
| BAG5     | 0.244  | 0.296 | 0.825  | 0.409 | 1.277 | 0.378 | 0.732  | 0.464 | 0.715 | 2.282 |
| BAG4     | 0.17   | 0.295 | 0.576  | 0.565 | 1.185 | 0.35  | 0.529  | 0.597 | 0.664 | 2.114 |
| BAG3     | 0.485  | 0.302 | 1.605  | 0.108 | 1.625 | 0.491 | 1.272  | 0.204 | 0.898 | 2.938 |
| BAG2     | -0.284 | 0.298 | -0.954 | 0.34  | 0.753 | 0.224 | -1.103 | 0.27  | 0.42  | 1.349 |
| BAG1     | -0.733 | 0.315 | -2.329 | 0.02  | 0.48  | 0.151 | -3.436 | 0.001 | 0.259 | 0.89  |
| BAD      | 0.332  | 0.3   | 1.105  | 0.269 | 1.393 | 0.418 | 0.94   | 0.347 | 0.774 | 2.51  |
| BACH2    | -0.21  | 0.296 | -0.71  | 0.478 | 0.811 | 0.24  | -0.79  | 0.429 | 0.454 | 1.447 |
| BACH1    | -0.224 | 0.297 | -0.754 | 0.451 | 0.8   | 0.237 | -0.845 | 0.398 | 0.447 | 1.43  |
| BACE2    | 0.067  | 0.295 | 0.227  | 0.82  | 1.069 | 0.316 | 0.22   | 0.826 | 0.6   | 1.908 |
| BACE1    | -0.536 | 0.306 | -1.753 | 0.08  | 0.585 | 0.179 | -2.319 | 0.02  | 0.322 | 1.065 |
| BABAM2   | -0.213 | 0.298 | -0.715 | 0.474 | 0.808 | 0.241 | -0.797 | 0.425 | 0.451 | 1.449 |
| BABAM1   | 0.099  | 0.295 | 0.335  | 0.737 | 1.104 | 0.326 | 0.319  | 0.75  | 0.619 | 1.97  |
| BAAT     | 0.271  | 0.296 | 0.915  | 0.36  | 1.311 | 0.388 | 0.802  | 0.423 | 0.734 | 2.342 |
| BAALC    | 0.303  | 0.298 | 1.017  | 0.309 | 1.354 | 0.403 | 0.878  | 0.38  | 0.755 | 2.426 |
| B9D2     | 0.088  | 0.296 | 0.296  | 0.767 | 1.092 | 0.323 | 0.284  | 0.777 | 0.611 | 1.95  |
| B9D1     | 0.123  | 0.296 | 0.415  | 0.678 | 1.131 | 0.334 | 0.39   | 0.696 | 0.633 | 2.018 |
| B4GAT1   | -0.187 | 0.297 | -0.631 | 0.528 | 0.829 | 0.246 | -0.694 | 0.488 | 0.463 | 1.484 |
| B4GALT7  | 0.601  | 0.303 | 1.983  | 0.047 | 1.824 | 0.553 | 1.491  | 0.136 | 1.007 | 3.303 |
| B4GALT6  | -0.318 | 0.298 | -1.069 | 0.285 | 0.728 | 0.217 | -1.258 | 0.208 | 0.406 | 1.304 |
| B4GALT5  | 0.376  | 0.303 | 1.242  | 0.214 | 1.457 | 0.441 | 1.035  | 0.3   | 0.805 | 2.637 |
| B4GALT4  | 0.83   | 0.311 | 2.671  | 0.008 | 2.293 | 0.712 | 1.815  | 0.07  | 1.247 | 4.214 |
| B4GALT3  | -0.354 | 0.3   | -1.18  | 0.238 | 0.702 | 0.21  | -1.416 | 0.157 | 0.39  | 1.263 |
| B4GALT2  | 0.37   | 0.298 | 1.242  | 0.214 | 1.448 | 0.431 | 1.038  | 0.299 | 0.807 | 2.595 |
| B4GALT1  | -0.151 | 0.295 | -0.511 | 0.61  | 0.86  | 0.254 | -0.551 | 0.581 | 0.482 | 1.534 |
| B4GALNT1 | 0.21   | 0.296 | 0.711  | 0.477 | 1.234 | 0.365 | 0.641  | 0.522 | 0.691 | 2.205 |
| B3GNTL1  | 0.448  | 0.3   | 1.494  | 0.135 | 1.566 | 0.47  | 1.204  | 0.228 | 0.87  | 2.819 |
| B3GNT4   | 0.058  | 0.295 | 0.195  | 0.845 | 1.059 | 0.313 | 0.19   | 0.849 | 0.594 | 1.89  |
| B3GNT3   | 0.404  | 0.3   | 1.35   | 0.177 | 1.498 | 0.449 | 1.11   | 0.267 | 0.833 | 2.695 |

|          |        |       |        |       |       |       |        |       |       |       |
|----------|--------|-------|--------|-------|-------|-------|--------|-------|-------|-------|
| B3GNT2   | -0.272 | 0.3   | -0.905 | 0.365 | 0.762 | 0.229 | -1.04  | 0.298 | 0.423 | 1.372 |
| B3GAT3   | 0.222  | 0.296 | 0.752  | 0.452 | 1.249 | 0.369 | 0.674  | 0.5   | 0.7   | 2.23  |
| B3GAT1   | 0.165  | 0.296 | 0.556  | 0.578 | 1.179 | 0.349 | 0.512  | 0.608 | 0.66  | 2.106 |
| B3GALT5  | 0.54   | 0.302 | 1.786  | 0.074 | 1.716 | 0.519 | 1.38   | 0.168 | 0.949 | 3.104 |
| B3GALT4  | 0.595  | 0.302 | 1.971  | 0.049 | 1.813 | 0.547 | 1.486  | 0.137 | 1.003 | 3.276 |
| B3GALT2  | -0.314 | 0.3   | -1.048 | 0.295 | 0.731 | 0.219 | -1.231 | 0.218 | 0.406 | 1.314 |
| B3GALT1  | 0.858  | 0.314 | 2.732  | 0.006 | 2.358 | 0.74  | 1.834  | 0.067 | 1.274 | 4.363 |
| B3GALNT1 | 0.103  | 0.296 | 0.348  | 0.728 | 1.108 | 0.328 | 0.33   | 0.741 | 0.62  | 1.981 |
| B2M      | 0.015  | 0.295 | 0.05   | 0.96  | 1.015 | 0.299 | 0.049  | 0.961 | 0.569 | 1.809 |
| AZU1     | 0.235  | 0.296 | 0.794  | 0.427 | 1.265 | 0.375 | 0.707  | 0.479 | 0.708 | 2.262 |
| AZIN1    | -0.043 | 0.295 | -0.144 | 0.885 | 0.958 | 0.283 | -0.147 | 0.883 | 0.537 | 1.71  |
| AZI2     | -0.049 | 0.295 | -0.165 | 0.869 | 0.952 | 0.281 | -0.169 | 0.866 | 0.534 | 1.698 |
| AZGP1P1  | -0.753 | 0.315 | -2.391 | 0.017 | 0.471 | 0.148 | -3.567 | 0     | 0.254 | 0.873 |
| AZGP1    | -0.529 | 0.303 | -1.747 | 0.081 | 0.589 | 0.178 | -2.303 | 0.021 | 0.326 | 1.066 |
| AXL      | -0.8   | 0.311 | -2.575 | 0.01  | 0.449 | 0.14  | -3.944 | 0     | 0.245 | 0.826 |
| AXIN1    | -0.381 | 0.3   | -1.271 | 0.204 | 0.683 | 0.205 | -1.547 | 0.122 | 0.38  | 1.23  |
| AVPR2    | -0.108 | 0.295 | -0.366 | 0.715 | 0.898 | 0.265 | -0.386 | 0.699 | 0.503 | 1.602 |
| AVPR1B   | 0.092  | 0.295 | 0.311  | 0.756 | 1.096 | 0.324 | 0.297  | 0.767 | 0.614 | 1.955 |
| AVPR1A   | 0.295  | 0.298 | 0.99   | 0.322 | 1.343 | 0.4   | 0.857  | 0.391 | 0.749 | 2.406 |
| AVPI1    | 0.223  | 0.296 | 0.754  | 0.451 | 1.25  | 0.37  | 0.676  | 0.499 | 0.7   | 2.233 |
| AVP      | 0.076  | 0.296 | 0.257  | 0.797 | 1.079 | 0.319 | 0.247  | 0.805 | 0.604 | 1.926 |
| AVL9     | 0.36   | 0.298 | 1.21   | 0.226 | 1.434 | 0.427 | 1.016  | 0.31  | 0.8   | 2.569 |
| AVIL     | 0.234  | 0.298 | 0.787  | 0.431 | 1.264 | 0.377 | 0.701  | 0.483 | 0.705 | 2.266 |
| AVEN     | 0.156  | 0.296 | 0.528  | 0.598 | 1.169 | 0.346 | 0.489  | 0.625 | 0.655 | 2.087 |
| AUTS2    | 0.233  | 0.296 | 0.786  | 0.432 | 1.262 | 0.374 | 0.701  | 0.483 | 0.706 | 2.256 |
| AURKC    | -0.027 | 0.297 | -0.091 | 0.928 | 0.973 | 0.289 | -0.092 | 0.927 | 0.544 | 1.741 |
| AURKB    | 0.686  | 0.306 | 2.244  | 0.025 | 1.986 | 0.607 | 1.624  | 0.104 | 1.091 | 3.616 |
| AURKAIP1 | 0.367  | 0.299 | 1.228  | 0.219 | 1.443 | 0.431 | 1.028  | 0.304 | 0.803 | 2.593 |
| AURKA    | 0.82   | 0.315 | 2.605  | 0.009 | 2.271 | 0.715 | 1.778  | 0.075 | 1.225 | 4.208 |
| AUP1     | 0.129  | 0.296 | 0.436  | 0.663 | 1.138 | 0.337 | 0.409  | 0.682 | 0.637 | 2.033 |
| AUNIP    | 0.64   | 0.306 | 2.094  | 0.036 | 1.897 | 0.58  | 1.547  | 0.122 | 1.042 | 3.452 |
| AUH      | -0.489 | 0.307 | -1.594 | 0.111 | 0.613 | 0.188 | -2.055 | 0.04  | 0.336 | 1.119 |
| ATXN8OS  | 0.31   | 0.298 | 1.041  | 0.298 | 1.363 | 0.406 | 0.896  | 0.371 | 0.761 | 2.442 |
| ATXN7L3B | -0.293 | 0.297 | -0.986 | 0.324 | 0.746 | 0.222 | -1.146 | 0.252 | 0.416 | 1.336 |
| ATXN7L1  | 0.845  | 0.315 | 2.684  | 0.007 | 2.328 | 0.733 | 1.812  | 0.07  | 1.256 | 4.314 |
| ATXN7    | -0.137 | 0.296 | -0.464 | 0.643 | 0.872 | 0.258 | -0.497 | 0.619 | 0.489 | 1.556 |
| ATXN3L   | 0.267  | 0.297 | 0.899  | 0.368 | 1.306 | 0.387 | 0.789  | 0.43  | 0.73  | 2.335 |
| ATXN3    | 0.626  | 0.304 | 2.06   | 0.039 | 1.87  | 0.568 | 1.531  | 0.126 | 1.031 | 3.393 |

|          |        |       |        |       |       |       |        |       |       |       |
|----------|--------|-------|--------|-------|-------|-------|--------|-------|-------|-------|
| ATXN2L   | 0.009  | 0.297 | 0.029  | 0.977 | 1.009 | 0.299 | 0.029  | 0.977 | 0.564 | 1.804 |
| ATXN2    | 0.118  | 0.296 | 0.398  | 0.69  | 1.125 | 0.333 | 0.376  | 0.707 | 0.63  | 2.009 |
| ATXN10   | -0.133 | 0.296 | -0.448 | 0.654 | 0.876 | 0.259 | -0.48  | 0.632 | 0.491 | 1.564 |
| ATXN1    | -0.882 | 0.311 | -2.834 | 0.005 | 0.414 | 0.129 | -4.55  | 0     | 0.225 | 0.762 |
| ATRX     | -0.159 | 0.296 | -0.537 | 0.591 | 0.853 | 0.253 | -0.582 | 0.561 | 0.477 | 1.524 |
| ATRNL1   | 0.448  | 0.3   | 1.494  | 0.135 | 1.565 | 0.469 | 1.205  | 0.228 | 0.87  | 2.816 |
| ATRN     | -0.1   | 0.295 | -0.337 | 0.736 | 0.905 | 0.267 | -0.355 | 0.723 | 0.507 | 1.615 |
| ATRAID   | -0.337 | 0.3   | -1.124 | 0.261 | 0.714 | 0.214 | -1.337 | 0.181 | 0.397 | 1.285 |
| ATR      | 0.456  | 0.303 | 1.506  | 0.132 | 1.578 | 0.478 | 1.209  | 0.227 | 0.872 | 2.856 |
| ATPAF2   | -0.136 | 0.299 | -0.455 | 0.649 | 0.873 | 0.261 | -0.487 | 0.626 | 0.486 | 1.568 |
| ATP9B    | -0.313 | 0.3   | -1.045 | 0.296 | 0.731 | 0.219 | -1.227 | 0.22  | 0.406 | 1.316 |
| ATP9A    | 0.334  | 0.298 | 1.122  | 0.262 | 1.397 | 0.416 | 0.954  | 0.34  | 0.779 | 2.506 |
| ATP8B4   | -0.171 | 0.296 | -0.576 | 0.565 | 0.843 | 0.25  | -0.628 | 0.53  | 0.472 | 1.507 |
| ATP8B3   | 0.301  | 0.298 | 1.01   | 0.312 | 1.351 | 0.402 | 0.873  | 0.383 | 0.754 | 2.42  |
| ATP8B2   | 0.128  | 0.296 | 0.431  | 0.666 | 1.136 | 0.337 | 0.405  | 0.685 | 0.636 | 2.031 |
| ATP8B1   | -0.413 | 0.3   | -1.377 | 0.169 | 0.661 | 0.199 | -1.705 | 0.088 | 0.367 | 1.191 |
| ATP8A2   | -0.218 | 0.296 | -0.734 | 0.463 | 0.804 | 0.239 | -0.82  | 0.412 | 0.45  | 1.438 |
| ATP8A1   | -0.621 | 0.304 | -2.043 | 0.041 | 0.537 | 0.163 | -2.832 | 0.005 | 0.296 | 0.975 |
| ATP7B    | -0.009 | 0.295 | -0.03  | 0.976 | 0.991 | 0.293 | -0.03  | 0.976 | 0.556 | 1.768 |
| ATP7A    | 0.015  | 0.296 | 0.052  | 0.959 | 1.015 | 0.3   | 0.051  | 0.959 | 0.569 | 1.813 |
| ATP6V1H  | 0.116  | 0.295 | 0.391  | 0.696 | 1.122 | 0.332 | 0.369  | 0.712 | 0.629 | 2.003 |
| ATP6V1G2 | 0.591  | 0.306 | 1.932  | 0.053 | 1.805 | 0.552 | 1.459  | 0.145 | 0.991 | 3.286 |
| ATP6V1G1 | 0.221  | 0.296 | 0.746  | 0.456 | 1.247 | 0.369 | 0.669  | 0.503 | 0.698 | 2.229 |
| ATP6V1F  | 0.121  | 0.297 | 0.406  | 0.685 | 1.128 | 0.335 | 0.383  | 0.702 | 0.631 | 2.018 |
| ATP6V1E1 | -0.106 | 0.295 | -0.358 | 0.72  | 0.9   | 0.266 | -0.377 | 0.706 | 0.504 | 1.605 |
| ATP6V1D  | 0.189  | 0.297 | 0.636  | 0.525 | 1.208 | 0.359 | 0.58   | 0.562 | 0.675 | 2.161 |
| ATP6V1C1 | 0.053  | 0.296 | 0.179  | 0.858 | 1.054 | 0.312 | 0.174  | 0.862 | 0.59  | 1.883 |
| ATP6V1B2 | -0.035 | 0.297 | -0.118 | 0.906 | 0.966 | 0.287 | -0.12  | 0.905 | 0.539 | 1.728 |
| ATP6V1B1 | 0.1    | 0.295 | 0.338  | 0.735 | 1.105 | 0.326 | 0.322  | 0.748 | 0.619 | 1.971 |
| ATP6V1A  | 0.226  | 0.298 | 0.758  | 0.448 | 1.253 | 0.373 | 0.679  | 0.497 | 0.699 | 2.247 |
| ATP6V0E2 | 0.128  | 0.295 | 0.432  | 0.666 | 1.136 | 0.336 | 0.406  | 0.685 | 0.637 | 2.027 |
| ATP6V0E1 | 0.142  | 0.296 | 0.479  | 0.632 | 1.152 | 0.341 | 0.447  | 0.655 | 0.645 | 2.057 |
| ATP6V0D1 | 0.141  | 0.295 | 0.476  | 0.634 | 1.151 | 0.34  | 0.444  | 0.657 | 0.645 | 2.053 |
| ATP6V0C  | -0.104 | 0.295 | -0.352 | 0.725 | 0.901 | 0.266 | -0.371 | 0.711 | 0.505 | 1.608 |
| ATP6V0B  | 0.174  | 0.296 | 0.589  | 0.556 | 1.19  | 0.352 | 0.541  | 0.589 | 0.667 | 2.125 |
| ATP6V0A4 | -0.272 | 0.297 | -0.917 | 0.359 | 0.762 | 0.226 | -1.054 | 0.292 | 0.426 | 1.363 |
| ATP6V0A2 | 0.427  | 0.3   | 1.426  | 0.154 | 1.533 | 0.46  | 1.16   | 0.246 | 0.852 | 2.759 |
| ATP6V0A1 | 0.019  | 0.297 | 0.065  | 0.948 | 1.019 | 0.302 | 0.064  | 0.949 | 0.57  | 1.823 |

|         |        |       |        |       |       |       |        |       |       |       |
|---------|--------|-------|--------|-------|-------|-------|--------|-------|-------|-------|
| ATP6AP2 | -0.168 | 0.297 | -0.567 | 0.571 | 0.845 | 0.251 | -0.617 | 0.537 | 0.472 | 1.513 |
| ATP6AP1 | -0.559 | 0.306 | -1.828 | 0.068 | 0.572 | 0.175 | -2.449 | 0.014 | 0.314 | 1.041 |
| ATP5PO  | 0.172  | 0.296 | 0.582  | 0.561 | 1.188 | 0.352 | 0.534  | 0.593 | 0.665 | 2.123 |
| ATP5PF  | 0.354  | 0.298 | 1.189  | 0.234 | 1.425 | 0.425 | 1.001  | 0.317 | 0.795 | 2.556 |
| ATP5PD  | 0.437  | 0.3   | 1.459  | 0.145 | 1.548 | 0.464 | 1.182  | 0.237 | 0.861 | 2.785 |
| ATP5PB  | 0.274  | 0.297 | 0.921  | 0.357 | 1.315 | 0.391 | 0.805  | 0.421 | 0.734 | 2.355 |
| ATP5MPL | 0.058  | 0.295 | 0.195  | 0.846 | 1.059 | 0.313 | 0.189  | 0.85  | 0.594 | 1.889 |
| ATP5MG  | -0.314 | 0.3   | -1.048 | 0.295 | 0.731 | 0.219 | -1.231 | 0.218 | 0.406 | 1.314 |
| ATP5ME  | 0.026  | 0.295 | 0.088  | 0.93  | 1.026 | 0.303 | 0.087  | 0.93  | 0.576 | 1.831 |
| ATP5MC3 | 0.281  | 0.298 | 0.945  | 0.345 | 1.325 | 0.394 | 0.824  | 0.41  | 0.739 | 2.374 |
| ATP5MC2 | -0.17  | 0.297 | -0.572 | 0.567 | 0.844 | 0.25  | -0.624 | 0.533 | 0.472 | 1.509 |
| ATP5MC1 | 0.523  | 0.302 | 1.729  | 0.084 | 1.687 | 0.51  | 1.347  | 0.178 | 0.933 | 3.05  |
| ATP5IF1 | 0.564  | 0.301 | 1.87   | 0.062 | 1.757 | 0.53  | 1.429  | 0.153 | 0.973 | 3.172 |
| ATP5F1E | 0.533  | 0.302 | 1.764  | 0.078 | 1.704 | 0.515 | 1.367  | 0.172 | 0.942 | 3.082 |
| ATP5F1D | -0.336 | 0.3   | -1.122 | 0.262 | 0.714 | 0.214 | -1.334 | 0.182 | 0.397 | 1.286 |
| ATP5F1C | 0.598  | 0.303 | 1.976  | 0.048 | 1.818 | 0.55  | 1.487  | 0.137 | 1.005 | 3.291 |
| ATP5F1B | 0.217  | 0.296 | 0.732  | 0.464 | 1.242 | 0.368 | 0.658  | 0.511 | 0.695 | 2.221 |
| ATP5F1A | 0.28   | 0.297 | 0.944  | 0.345 | 1.323 | 0.392 | 0.823  | 0.41  | 0.74  | 2.367 |
| ATP4B   | 0.736  | 0.307 | 2.398  | 0.016 | 2.088 | 0.641 | 1.697  | 0.09  | 1.144 | 3.813 |
| ATP4A   | 0.645  | 0.304 | 2.124  | 0.034 | 1.905 | 0.578 | 1.565  | 0.118 | 1.051 | 3.454 |
| ATP2C2  | -0.263 | 0.296 | -0.887 | 0.375 | 0.769 | 0.228 | -1.015 | 0.31  | 0.43  | 1.374 |
| ATP2C1  | 0.407  | 0.302 | 1.346  | 0.178 | 1.502 | 0.454 | 1.105  | 0.269 | 0.83  | 2.718 |
| ATP2B4  | -0.833 | 0.311 | -2.677 | 0.007 | 0.435 | 0.135 | -4.179 | 0     | 0.236 | 0.8   |
| ATP2B3  | -0.232 | 0.298 | -0.781 | 0.435 | 0.793 | 0.236 | -0.879 | 0.38  | 0.442 | 1.421 |
| ATP2B2  | -0.11  | 0.296 | -0.372 | 0.71  | 0.896 | 0.265 | -0.393 | 0.694 | 0.502 | 1.6   |
| ATP2B1  | -0.162 | 0.296 | -0.547 | 0.584 | 0.851 | 0.252 | -0.594 | 0.553 | 0.476 | 1.519 |
| ATP2A3  | -0.178 | 0.296 | -0.601 | 0.548 | 0.837 | 0.248 | -0.658 | 0.511 | 0.468 | 1.496 |
| ATP2A2  | -0.238 | 0.297 | -0.801 | 0.423 | 0.788 | 0.234 | -0.905 | 0.366 | 0.44  | 1.411 |
| ATP2A1  | -0.025 | 0.295 | -0.083 | 0.934 | 0.976 | 0.288 | -0.084 | 0.933 | 0.547 | 1.741 |
| ATP1B4  | -0.014 | 0.295 | -0.049 | 0.961 | 0.986 | 0.291 | -0.049 | 0.961 | 0.553 | 1.757 |
| ATP1B3  | 0.63   | 0.303 | 2.08   | 0.038 | 1.878 | 0.569 | 1.543  | 0.123 | 1.037 | 3.401 |
| ATP1B2  | 0.295  | 0.3   | 0.984  | 0.325 | 1.343 | 0.403 | 0.852  | 0.394 | 0.746 | 2.417 |
| ATP1B1  | -0.319 | 0.3   | -1.064 | 0.287 | 0.727 | 0.218 | -1.254 | 0.21  | 0.404 | 1.308 |
| ATP1A3  | 0.01   | 0.295 | 0.033  | 0.973 | 1.01  | 0.298 | 0.033  | 0.974 | 0.566 | 1.801 |
| ATP1A2  | -0.834 | 0.31  | -2.691 | 0.007 | 0.434 | 0.135 | -4.203 | 0     | 0.237 | 0.797 |
| ATP1A1  | -0.247 | 0.298 | -0.83  | 0.407 | 0.781 | 0.232 | -0.941 | 0.347 | 0.436 | 1.4   |
| ATP13A3 | 0.282  | 0.297 | 0.948  | 0.343 | 1.326 | 0.394 | 0.826  | 0.409 | 0.74  | 2.376 |
| ATP13A2 | 0.156  | 0.298 | 0.524  | 0.6   | 1.169 | 0.348 | 0.485  | 0.628 | 0.652 | 2.094 |



|         |        |       |        |       |       |       |        |       |       |       |
|---------|--------|-------|--------|-------|-------|-------|--------|-------|-------|-------|
| ATP13A1 | 0.042  | 0.296 | 0.142  | 0.887 | 1.043 | 0.309 | 0.139  | 0.89  | 0.584 | 1.864 |
| ATP12A  | 0.057  | 0.295 | 0.192  | 0.848 | 1.058 | 0.312 | 0.186  | 0.852 | 0.593 | 1.887 |
| ATP11B  | 0.48   | 0.306 | 1.57   | 0.116 | 1.616 | 0.494 | 1.247  | 0.212 | 0.888 | 2.942 |
| ATP11A  | -0.3   | 0.298 | -1.005 | 0.315 | 0.741 | 0.221 | -1.172 | 0.241 | 0.413 | 1.329 |
| ATP10D  | -0.348 | 0.298 | -1.167 | 0.243 | 0.706 | 0.21  | -1.396 | 0.163 | 0.394 | 1.267 |
| ATP10B  | -0.145 | 0.297 | -0.489 | 0.625 | 0.865 | 0.257 | -0.526 | 0.599 | 0.483 | 1.548 |
| ATP10A  | 0.143  | 0.296 | 0.483  | 0.629 | 1.153 | 0.341 | 0.45   | 0.652 | 0.646 | 2.059 |
| ATOX1   | 0.041  | 0.296 | 0.14   | 0.889 | 1.042 | 0.308 | 0.137  | 0.891 | 0.584 | 1.86  |
| ATOH1   | 0.206  | 0.296 | 0.697  | 0.486 | 1.229 | 0.364 | 0.63   | 0.529 | 0.688 | 2.197 |
| ATN1    | 0.325  | 0.3   | 1.083  | 0.279 | 1.384 | 0.415 | 0.925  | 0.355 | 0.769 | 2.493 |
| ATMIN   | 0.295  | 0.296 | 0.997  | 0.319 | 1.344 | 0.398 | 0.863  | 0.388 | 0.752 | 2.402 |
| ATM     | -0.766 | 0.308 | -2.487 | 0.013 | 0.465 | 0.143 | -3.736 | 0     | 0.254 | 0.85  |
| ATIC    | -0.12  | 0.295 | -0.406 | 0.685 | 0.887 | 0.262 | -0.431 | 0.666 | 0.497 | 1.583 |
| ATG9A   | -0.349 | 0.299 | -1.166 | 0.244 | 0.706 | 0.211 | -1.395 | 0.163 | 0.393 | 1.268 |
| ATG7    | -0.177 | 0.296 | -0.6   | 0.549 | 0.837 | 0.248 | -0.656 | 0.512 | 0.469 | 1.495 |
| ATG5    | 0.25   | 0.296 | 0.844  | 0.399 | 1.284 | 0.38  | 0.747  | 0.455 | 0.719 | 2.294 |
| ATG4B   | 0.431  | 0.303 | 1.423  | 0.155 | 1.538 | 0.466 | 1.156  | 0.248 | 0.85  | 2.784 |
| ATG4A   | -0.255 | 0.3   | -0.849 | 0.396 | 0.775 | 0.233 | -0.967 | 0.333 | 0.431 | 1.395 |
| ATG3    | 0.618  | 0.306 | 2.021  | 0.043 | 1.854 | 0.567 | 1.507  | 0.132 | 1.019 | 3.376 |
| ATG2B   | -0.191 | 0.296 | -0.646 | 0.518 | 0.826 | 0.245 | -0.712 | 0.477 | 0.462 | 1.476 |
| ATG2A   | 0.698  | 0.306 | 2.281  | 0.023 | 2.009 | 0.615 | 1.642  | 0.101 | 1.103 | 3.66  |
| ATG16L1 | 0.181  | 0.296 | 0.61   | 0.542 | 1.198 | 0.355 | 0.558  | 0.577 | 0.67  | 2.14  |
| ATG14   | -0.347 | 0.298 | -1.164 | 0.244 | 0.707 | 0.211 | -1.392 | 0.164 | 0.394 | 1.268 |
| ATG13   | -0.201 | 0.297 | -0.677 | 0.498 | 0.818 | 0.243 | -0.75  | 0.453 | 0.457 | 1.464 |
| ATG12   | 0.452  | 0.3   | 1.507  | 0.132 | 1.572 | 0.472 | 1.212  | 0.225 | 0.873 | 2.831 |
| ATG101  | 0.318  | 0.297 | 1.069  | 0.285 | 1.374 | 0.408 | 0.916  | 0.36  | 0.767 | 2.46  |
| ATG10   | 0.051  | 0.295 | 0.172  | 0.863 | 1.052 | 0.31  | 0.168  | 0.867 | 0.59  | 1.876 |
| ATF7IP2 | -0.516 | 0.306 | -1.687 | 0.092 | 0.597 | 0.182 | -2.208 | 0.027 | 0.328 | 1.087 |
| ATF7IP  | 0.929  | 0.316 | 2.935  | 0.003 | 2.532 | 0.801 | 1.912  | 0.056 | 1.362 | 4.707 |
| ATF7    | -0.192 | 0.296 | -0.65  | 0.516 | 0.825 | 0.244 | -0.716 | 0.474 | 0.462 | 1.474 |
| ATF6B   | 0.195  | 0.296 | 0.657  | 0.511 | 1.215 | 0.36  | 0.597  | 0.55  | 0.68  | 2.17  |
| ATF6    | 0.144  | 0.297 | 0.485  | 0.628 | 1.155 | 0.343 | 0.451  | 0.652 | 0.645 | 2.066 |
| ATF5    | -0.293 | 0.3   | -0.978 | 0.328 | 0.746 | 0.223 | -1.136 | 0.256 | 0.415 | 1.342 |
| ATF4    | 0.311  | 0.298 | 1.046  | 0.296 | 1.365 | 0.407 | 0.899  | 0.369 | 0.762 | 2.447 |
| ATF3    | -0.046 | 0.295 | -0.155 | 0.877 | 0.955 | 0.282 | -0.159 | 0.874 | 0.535 | 1.704 |
| ATF2    | -0.096 | 0.295 | -0.326 | 0.745 | 0.908 | 0.268 | -0.342 | 0.732 | 0.509 | 1.621 |
| ATF1    | -0.354 | 0.298 | -1.19  | 0.234 | 0.702 | 0.209 | -1.428 | 0.153 | 0.392 | 1.258 |
| ATAT1   | 0.638  | 0.306 | 2.087  | 0.037 | 1.893 | 0.578 | 1.543  | 0.123 | 1.04  | 3.445 |

|           |        |       |        |       |       |       |        |       |       |       |
|-----------|--------|-------|--------|-------|-------|-------|--------|-------|-------|-------|
| ATAD5     | 0.822  | 0.315 | 2.608  | 0.009 | 2.274 | 0.716 | 1.778  | 0.075 | 1.226 | 4.217 |
| ATAD2B    | 1.342  | 0.346 | 3.874  | 0     | 3.826 | 1.325 | 2.133  | 0.033 | 1.94  | 7.542 |
| ATAD2     | 0.777  | 0.315 | 2.465  | 0.014 | 2.175 | 0.686 | 1.714  | 0.087 | 1.173 | 4.035 |
| ASXL2     | -0.439 | 0.299 | -1.465 | 0.143 | 0.645 | 0.193 | -1.84  | 0.066 | 0.359 | 1.16  |
| ASXL1     | -0.297 | 0.297 | -1.002 | 0.317 | 0.743 | 0.221 | -1.167 | 0.243 | 0.415 | 1.329 |
| ASTN2     | -0.1   | 0.295 | -0.34  | 0.734 | 0.904 | 0.267 | -0.358 | 0.721 | 0.507 | 1.614 |
| ASTN1     | 0.215  | 0.301 | 0.714  | 0.475 | 1.24  | 0.373 | 0.642  | 0.521 | 0.687 | 2.236 |
| ASTE1     | 0.101  | 0.296 | 0.341  | 0.733 | 1.106 | 0.327 | 0.324  | 0.746 | 0.619 | 1.976 |
| ASS1      | 0.18   | 0.296 | 0.606  | 0.544 | 1.197 | 0.355 | 0.555  | 0.579 | 0.67  | 2.139 |
| ASRGL1    | 0.379  | 0.298 | 1.27   | 0.204 | 1.46  | 0.435 | 1.058  | 0.29  | 0.814 | 2.619 |
| ASPSCR1   | -0.185 | 0.295 | -0.627 | 0.53  | 0.831 | 0.245 | -0.689 | 0.491 | 0.466 | 1.482 |
| ASPN      | -0.492 | 0.302 | -1.629 | 0.103 | 0.611 | 0.185 | -2.104 | 0.035 | 0.338 | 1.105 |
| ASPM      | 0.503  | 0.303 | 1.663  | 0.096 | 1.654 | 0.5   | 1.307  | 0.191 | 0.914 | 2.992 |
| ASPHD1    | 0.487  | 0.301 | 1.618  | 0.106 | 1.628 | 0.49  | 1.281  | 0.2   | 0.902 | 2.936 |
| ASPH      | -0.916 | 0.321 | -2.854 | 0.004 | 0.4   | 0.128 | -4.67  | 0     | 0.213 | 0.751 |
| ASPA      | -0.468 | 0.306 | -1.528 | 0.127 | 0.626 | 0.192 | -1.948 | 0.051 | 0.344 | 1.142 |
| ASNSD1    | 0.241  | 0.299 | 0.806  | 0.42  | 1.272 | 0.38  | 0.716  | 0.474 | 0.708 | 2.285 |
| ASNS      | 0.434  | 0.298 | 1.457  | 0.145 | 1.543 | 0.46  | 1.182  | 0.237 | 0.861 | 2.767 |
| ASMTL-AS1 | 0.413  | 0.3   | 1.376  | 0.169 | 1.511 | 0.453 | 1.127  | 0.26  | 0.839 | 2.721 |
| ASMTL     | -0.058 | 0.298 | -0.194 | 0.847 | 0.944 | 0.281 | -0.199 | 0.842 | 0.526 | 1.693 |
| ASMT      | 0.25   | 0.297 | 0.844  | 0.399 | 1.284 | 0.381 | 0.747  | 0.455 | 0.718 | 2.297 |
| ASL       | 0.623  | 0.304 | 2.05   | 0.04  | 1.865 | 0.567 | 1.525  | 0.127 | 1.028 | 3.386 |
| ASIP      | 0.006  | 0.296 | 0.021  | 0.983 | 1.006 | 0.298 | 0.021  | 0.984 | 0.563 | 1.798 |
| ASIC4     | 0.368  | 0.299 | 1.228  | 0.219 | 1.444 | 0.433 | 1.027  | 0.304 | 0.803 | 2.598 |
| ASIC2     | 0.426  | 0.3   | 1.421  | 0.155 | 1.531 | 0.459 | 1.157  | 0.247 | 0.851 | 2.755 |
| ASIC1     | 0.659  | 0.306 | 2.155  | 0.031 | 1.932 | 0.591 | 1.578  | 0.114 | 1.061 | 3.518 |
| ASH2L     | -0.381 | 0.3   | -1.272 | 0.203 | 0.683 | 0.205 | -1.549 | 0.121 | 0.38  | 1.229 |
| ASH1L     | 0.474  | 0.306 | 1.549  | 0.121 | 1.607 | 0.492 | 1.234  | 0.217 | 0.882 | 2.928 |
| ASGR2     | 0.168  | 0.296 | 0.567  | 0.571 | 1.183 | 0.35  | 0.522  | 0.602 | 0.662 | 2.113 |
| ASGR1     | 0.135  | 0.295 | 0.456  | 0.649 | 1.144 | 0.338 | 0.426  | 0.67  | 0.641 | 2.041 |
| ASF1B     | 0.628  | 0.306 | 2.055  | 0.04  | 1.874 | 0.573 | 1.526  | 0.127 | 1.029 | 3.412 |
| ASF1A     | 0.217  | 0.296 | 0.734  | 0.463 | 1.243 | 0.368 | 0.66   | 0.509 | 0.696 | 2.221 |
| ASCL3     | 0.058  | 0.297 | 0.195  | 0.845 | 1.06  | 0.314 | 0.19   | 0.849 | 0.592 | 1.896 |
| ASCL2     | 0.429  | 0.3   | 1.433  | 0.152 | 1.536 | 0.46  | 1.165  | 0.244 | 0.854 | 2.763 |
| ASCL1     | 0.103  | 0.296 | 0.348  | 0.728 | 1.109 | 0.328 | 0.331  | 0.741 | 0.621 | 1.979 |
| ASCC3     | -0.253 | 0.297 | -0.852 | 0.394 | 0.777 | 0.23  | -0.97  | 0.332 | 0.434 | 1.389 |
| ASCC2     | -0.627 | 0.306 | -2.05  | 0.04  | 0.534 | 0.163 | -2.852 | 0.004 | 0.293 | 0.973 |
| ASCC1     | 0.357  | 0.299 | 1.192  | 0.233 | 1.429 | 0.428 | 1.002  | 0.316 | 0.795 | 2.57  |

|           |        |       |        |       |       |       |        |       |       |       |
|-----------|--------|-------|--------|-------|-------|-------|--------|-------|-------|-------|
| ASB9      | 0.566  | 0.306 | 1.852  | 0.064 | 1.761 | 0.538 | 1.415  | 0.157 | 0.968 | 3.206 |
| ASB8      | 0.131  | 0.296 | 0.442  | 0.659 | 1.14  | 0.337 | 0.414  | 0.679 | 0.638 | 2.034 |
| ASB7      | -0.148 | 0.299 | -0.495 | 0.62  | 0.862 | 0.258 | -0.534 | 0.593 | 0.48  | 1.549 |
| ASB6      | 0.349  | 0.3   | 1.164  | 0.245 | 1.417 | 0.425 | 0.982  | 0.326 | 0.788 | 2.55  |
| ASB4      | -0.162 | 0.296 | -0.545 | 0.586 | 0.851 | 0.252 | -0.592 | 0.554 | 0.476 | 1.521 |
| ASB13     | -0.355 | 0.3   | -1.185 | 0.236 | 0.701 | 0.21  | -1.423 | 0.155 | 0.39  | 1.261 |
| ASB1      | -0.577 | 0.304 | -1.899 | 0.058 | 0.561 | 0.171 | -2.57  | 0.01  | 0.309 | 1.019 |
| ASAP3     | -0.025 | 0.299 | -0.083 | 0.934 | 0.976 | 0.292 | -0.084 | 0.933 | 0.542 | 1.754 |
| ASAP2     | 0.681  | 0.31  | 2.198  | 0.028 | 1.976 | 0.612 | 1.594  | 0.111 | 1.077 | 3.626 |
| ASAP1-IT1 | 0.448  | 0.303 | 1.477  | 0.14  | 1.565 | 0.474 | 1.19   | 0.234 | 0.864 | 2.835 |
| ASAP1     | 0.28   | 0.297 | 0.94   | 0.347 | 1.323 | 0.393 | 0.82   | 0.412 | 0.738 | 2.369 |
| ASAH1     | -0.686 | 0.31  | -2.215 | 0.027 | 0.504 | 0.156 | -3.183 | 0.001 | 0.274 | 0.924 |
| ARVCF     | 0.249  | 0.298 | 0.836  | 0.403 | 1.282 | 0.382 | 0.74   | 0.459 | 0.716 | 2.298 |
| ARTN      | 0.328  | 0.297 | 1.105  | 0.269 | 1.388 | 0.412 | 0.942  | 0.346 | 0.776 | 2.483 |
| ART4      | -0.177 | 0.295 | -0.598 | 0.55  | 0.838 | 0.248 | -0.654 | 0.513 | 0.47  | 1.495 |
| ART3      | 0.097  | 0.296 | 0.328  | 0.743 | 1.102 | 0.327 | 0.313  | 0.754 | 0.616 | 1.971 |
| ART1      | -0.312 | 0.297 | -1.051 | 0.293 | 0.732 | 0.217 | -1.233 | 0.217 | 0.409 | 1.31  |
| ARSL      | -0.404 | 0.298 | -1.357 | 0.175 | 0.667 | 0.199 | -1.673 | 0.094 | 0.372 | 1.197 |
| ARSJ      | 0.028  | 0.296 | 0.095  | 0.924 | 1.029 | 0.304 | 0.094  | 0.925 | 0.576 | 1.836 |
| ARSF      | -0.229 | 0.296 | -0.772 | 0.44  | 0.795 | 0.236 | -0.867 | 0.386 | 0.445 | 1.422 |
| ARSD      | -0.29  | 0.3   | -0.968 | 0.333 | 0.748 | 0.224 | -1.123 | 0.261 | 0.416 | 1.346 |
| ARSB      | -0.214 | 0.296 | -0.724 | 0.469 | 0.807 | 0.239 | -0.807 | 0.42  | 0.451 | 1.443 |
| ARSA      | -0.07  | 0.296 | -0.235 | 0.814 | 0.933 | 0.276 | -0.243 | 0.808 | 0.523 | 1.665 |
| ARRB2     | -0.227 | 0.296 | -0.765 | 0.445 | 0.797 | 0.236 | -0.858 | 0.391 | 0.446 | 1.425 |
| ARRB1     | -0.213 | 0.296 | -0.719 | 0.472 | 0.808 | 0.239 | -0.801 | 0.423 | 0.452 | 1.444 |
| ARR3      | 0.158  | 0.297 | 0.532  | 0.595 | 1.171 | 0.348 | 0.492  | 0.623 | 0.654 | 2.096 |
| ARPP21    | 0.289  | 0.296 | 0.974  | 0.33  | 1.335 | 0.396 | 0.846  | 0.398 | 0.747 | 2.387 |
| ARPP19    | -0.343 | 0.3   | -1.143 | 0.253 | 0.71  | 0.213 | -1.364 | 0.173 | 0.395 | 1.277 |
| ARPIN     | 0.316  | 0.3   | 1.055  | 0.291 | 1.372 | 0.411 | 0.905  | 0.366 | 0.763 | 2.467 |
| ARPC5L    | 0.857  | 0.31  | 2.762  | 0.006 | 2.357 | 0.732 | 1.855  | 0.064 | 1.283 | 4.33  |
| ARPC5     | -0.146 | 0.296 | -0.492 | 0.623 | 0.864 | 0.256 | -0.53  | 0.596 | 0.484 | 1.544 |
| ARPC4     | -0.266 | 0.298 | -0.892 | 0.372 | 0.767 | 0.228 | -1.022 | 0.307 | 0.428 | 1.374 |
| ARPC3     | -0.52  | 0.302 | -1.718 | 0.086 | 0.595 | 0.18  | -2.253 | 0.024 | 0.329 | 1.076 |
| ARPC2     | 0.154  | 0.295 | 0.52   | 0.603 | 1.166 | 0.345 | 0.482  | 0.63  | 0.653 | 2.081 |
| ARPC1B    | -0.036 | 0.295 | -0.121 | 0.904 | 0.965 | 0.285 | -0.123 | 0.902 | 0.541 | 1.721 |
| ARPC1A    | -0.291 | 0.3   | -0.971 | 0.332 | 0.748 | 0.224 | -1.127 | 0.26  | 0.416 | 1.345 |
| ARNTL2    | -0.45  | 0.3   | -1.5   | 0.133 | 0.637 | 0.191 | -1.895 | 0.058 | 0.354 | 1.148 |
| ARNTL     | -0.142 | 0.297 | -0.477 | 0.633 | 0.868 | 0.257 | -0.513 | 0.608 | 0.485 | 1.552 |

|         |        |       |        |       |       |       |        |       |       |       |
|---------|--------|-------|--------|-------|-------|-------|--------|-------|-------|-------|
| ARNT2   | 0.026  | 0.297 | 0.087  | 0.93  | 1.026 | 0.304 | 0.086  | 0.931 | 0.574 | 1.836 |
| ARNT    | 0.23   | 0.297 | 0.777  | 0.437 | 1.259 | 0.373 | 0.694  | 0.488 | 0.704 | 2.252 |
| ARMT1   | -0.203 | 0.298 | -0.683 | 0.495 | 0.816 | 0.243 | -0.757 | 0.449 | 0.455 | 1.463 |
| ARMH3   | -0.181 | 0.296 | -0.613 | 0.54  | 0.834 | 0.247 | -0.672 | 0.502 | 0.467 | 1.49  |
| ARMCX6  | 0.506  | 0.301 | 1.683  | 0.092 | 1.659 | 0.499 | 1.321  | 0.187 | 0.92  | 2.992 |
| ARMCX5  | 0.133  | 0.297 | 0.447  | 0.655 | 1.142 | 0.339 | 0.418  | 0.676 | 0.638 | 2.044 |
| ARMCX4  | 0.645  | 0.303 | 2.131  | 0.033 | 1.907 | 0.577 | 1.57   | 0.116 | 1.053 | 3.451 |
| ARMCX3  | 0.079  | 0.295 | 0.268  | 0.789 | 1.082 | 0.32  | 0.257  | 0.797 | 0.607 | 1.931 |
| ARMCX2  | -0.672 | 0.31  | -2.17  | 0.03  | 0.511 | 0.158 | -3.094 | 0.002 | 0.278 | 0.937 |
| ARMCX1  | -0.414 | 0.3   | -1.38  | 0.167 | 0.661 | 0.198 | -1.71  | 0.087 | 0.367 | 1.19  |
| ARMC9   | -0.059 | 0.296 | -0.199 | 0.842 | 0.943 | 0.279 | -0.205 | 0.838 | 0.528 | 1.683 |
| ARMC8   | -0.035 | 0.295 | -0.118 | 0.906 | 0.966 | 0.285 | -0.12  | 0.904 | 0.541 | 1.723 |
| ARMC7   | 0.219  | 0.296 | 0.739  | 0.46  | 1.245 | 0.368 | 0.664  | 0.507 | 0.697 | 2.223 |
| ARMC6   | 0.671  | 0.31  | 2.165  | 0.03  | 1.956 | 0.606 | 1.577  | 0.115 | 1.065 | 3.589 |
| ARMC4   | -0.188 | 0.296 | -0.633 | 0.527 | 0.829 | 0.246 | -0.696 | 0.486 | 0.464 | 1.482 |
| ARMC1   | 0.782  | 0.31  | 2.525  | 0.012 | 2.186 | 0.677 | 1.752  | 0.08  | 1.191 | 4.013 |
| ARL8B   | -0.756 | 0.315 | -2.402 | 0.016 | 0.469 | 0.148 | -3.59  | 0     | 0.253 | 0.87  |
| ARL6IP5 | -0.781 | 0.31  | -2.52  | 0.012 | 0.458 | 0.142 | -3.819 | 0     | 0.25  | 0.841 |
| ARL6IP4 | -0.222 | 0.301 | -0.737 | 0.461 | 0.801 | 0.241 | -0.826 | 0.409 | 0.444 | 1.445 |
| ARL6IP1 | 0.853  | 0.315 | 2.71   | 0.007 | 2.348 | 0.739 | 1.823  | 0.068 | 1.266 | 4.352 |
| ARL4D   | 0.338  | 0.3   | 1.126  | 0.26  | 1.402 | 0.42  | 0.955  | 0.339 | 0.779 | 2.522 |
| ARL4C   | -0.071 | 0.295 | -0.24  | 0.81  | 0.931 | 0.275 | -0.249 | 0.803 | 0.522 | 1.662 |
| ARL4A   | 0.403  | 0.302 | 1.334  | 0.182 | 1.497 | 0.453 | 1.098  | 0.272 | 0.828 | 2.707 |
| ARL3    | 0.028  | 0.299 | 0.095  | 0.924 | 1.029 | 0.307 | 0.094  | 0.925 | 0.573 | 1.848 |
| ARL2BP  | -0.39  | 0.299 | -1.305 | 0.192 | 0.677 | 0.202 | -1.597 | 0.11  | 0.377 | 1.216 |
| ARL2    | 0.41   | 0.298 | 1.374  | 0.17  | 1.507 | 0.449 | 1.127  | 0.26  | 0.84  | 2.703 |
| ARL15   | 0.339  | 0.298 | 1.137  | 0.256 | 1.403 | 0.418 | 0.964  | 0.335 | 0.783 | 2.515 |
| ARL14   | -0.332 | 0.298 | -1.116 | 0.264 | 0.717 | 0.214 | -1.324 | 0.186 | 0.4   | 1.286 |
| ARL1    | 0.249  | 0.296 | 0.84   | 0.401 | 1.282 | 0.38  | 0.744  | 0.457 | 0.718 | 2.291 |
| ARIH2   | -0.171 | 0.296 | -0.577 | 0.564 | 0.843 | 0.25  | -0.629 | 0.529 | 0.472 | 1.507 |
| ARIH1   | -0.554 | 0.306 | -1.81  | 0.07  | 0.575 | 0.176 | -2.418 | 0.016 | 0.316 | 1.047 |
| ARID5B  | -0.429 | 0.297 | -1.442 | 0.149 | 0.651 | 0.194 | -1.8   | 0.072 | 0.364 | 1.167 |
| ARID5A  | 0.062  | 0.296 | 0.208  | 0.835 | 1.064 | 0.314 | 0.202  | 0.84  | 0.596 | 1.899 |
| ARID4B  | -0.218 | 0.296 | -0.737 | 0.461 | 0.804 | 0.238 | -0.823 | 0.41  | 0.45  | 1.436 |
| ARID4A  | -0.502 | 0.306 | -1.643 | 0.1   | 0.605 | 0.185 | -2.134 | 0.033 | 0.332 | 1.102 |
| ARID3B  | -0.205 | 0.295 | -0.694 | 0.488 | 0.815 | 0.241 | -0.77  | 0.441 | 0.457 | 1.454 |
| ARID3A  | -0.155 | 0.296 | -0.523 | 0.601 | 0.857 | 0.253 | -0.566 | 0.572 | 0.48  | 1.53  |
| ARID1A  | -0.598 | 0.303 | -1.974 | 0.048 | 0.55  | 0.167 | -2.701 | 0.007 | 0.304 | 0.996 |

|           |        |       |        |       |       |       |        |       |       |       |
|-----------|--------|-------|--------|-------|-------|-------|--------|-------|-------|-------|
| ARHGEF9   | 0.367  | 0.3   | 1.224  | 0.221 | 1.443 | 0.432 | 1.025  | 0.305 | 0.802 | 2.597 |
| ARHGEF7   | 0.758  | 0.31  | 2.446  | 0.014 | 2.135 | 0.662 | 1.714  | 0.086 | 1.163 | 3.92  |
| ARHGEF6   | 0.209  | 0.296 | 0.707  | 0.479 | 1.233 | 0.365 | 0.638  | 0.523 | 0.69  | 2.202 |
| ARHGEF5   | 0.225  | 0.296 | 0.762  | 0.446 | 1.253 | 0.371 | 0.682  | 0.495 | 0.702 | 2.237 |
| ARHGEF40  | 0.126  | 0.295 | 0.427  | 0.67  | 1.134 | 0.335 | 0.401  | 0.688 | 0.636 | 2.024 |
| ARHGEF4   | 0.122  | 0.296 | 0.412  | 0.68  | 1.13  | 0.335 | 0.388  | 0.698 | 0.632 | 2.02  |
| ARHGEF38  | 0.143  | 0.295 | 0.485  | 0.627 | 1.154 | 0.341 | 0.452  | 0.651 | 0.647 | 2.059 |
| ARHGEF3   | -0.471 | 0.3   | -1.572 | 0.116 | 0.624 | 0.187 | -2.008 | 0.045 | 0.347 | 1.123 |
| ARHGEF28  | -0.177 | 0.296 | -0.598 | 0.55  | 0.838 | 0.248 | -0.654 | 0.513 | 0.469 | 1.497 |
| ARHGEF26  | -0.387 | 0.303 | -1.279 | 0.201 | 0.679 | 0.206 | -1.561 | 0.118 | 0.375 | 1.229 |
| ARHGEF2   | 0.084  | 0.295 | 0.283  | 0.777 | 1.087 | 0.321 | 0.272  | 0.786 | 0.609 | 1.94  |
| ARHGEF18  | -0.174 | 0.296 | -0.589 | 0.556 | 0.84  | 0.248 | -0.644 | 0.52  | 0.471 | 1.499 |
| ARHGEF17  | -0.076 | 0.295 | -0.256 | 0.798 | 0.927 | 0.274 | -0.266 | 0.79  | 0.52  | 1.654 |
| ARHGEF16  | -0.078 | 0.297 | -0.261 | 0.794 | 0.925 | 0.275 | -0.272 | 0.786 | 0.517 | 1.657 |
| ARHGEF15  | 0.165  | 0.298 | 0.552  | 0.581 | 1.179 | 0.351 | 0.509  | 0.61  | 0.657 | 2.114 |
| ARHGEF12  | -0.098 | 0.296 | -0.333 | 0.739 | 0.906 | 0.268 | -0.35  | 0.726 | 0.508 | 1.618 |
| ARHGEF11  | -0.175 | 0.296 | -0.592 | 0.554 | 0.839 | 0.248 | -0.647 | 0.517 | 0.47  | 1.499 |
| ARHGEF10L | 0.335  | 0.298 | 1.126  | 0.26  | 1.398 | 0.416 | 0.957  | 0.339 | 0.78  | 2.506 |
| ARHGEF10  | -0.425 | 0.3   | -1.418 | 0.156 | 0.654 | 0.196 | -1.767 | 0.077 | 0.364 | 1.176 |
| ARHGDI    | 0.15   | 0.296 | 0.507  | 0.612 | 1.162 | 0.345 | 0.471  | 0.638 | 0.65  | 2.078 |
| ARHGDI    | -0.323 | 0.3   | -1.075 | 0.282 | 0.724 | 0.217 | -1.269 | 0.205 | 0.402 | 1.304 |
| ARHGDI    | -0.203 | 0.296 | -0.684 | 0.494 | 0.816 | 0.242 | -0.759 | 0.448 | 0.457 | 1.459 |
| ARHGAP6   | -0.234 | 0.297 | -0.79  | 0.429 | 0.791 | 0.235 | -0.89  | 0.373 | 0.442 | 1.415 |
| ARHGAP5   | -0.747 | 0.31  | -2.409 | 0.016 | 0.474 | 0.147 | -3.583 | 0     | 0.258 | 0.87  |
| ARHGAP45  | 0.02   | 0.296 | 0.066  | 0.947 | 1.02  | 0.301 | 0.065  | 0.948 | 0.571 | 1.82  |
| ARHGAP44  | -0.008 | 0.296 | -0.026 | 0.979 | 0.992 | 0.294 | -0.026 | 0.979 | 0.555 | 1.774 |
| ARHGAP4   | -0.475 | 0.302 | -1.572 | 0.116 | 0.622 | 0.188 | -2.013 | 0.044 | 0.344 | 1.124 |
| ARHGAP35  | 0.158  | 0.295 | 0.536  | 0.592 | 1.171 | 0.346 | 0.496  | 0.62  | 0.657 | 2.09  |
| ARHGAP33  | 0.663  | 0.303 | 2.185  | 0.029 | 1.94  | 0.588 | 1.598  | 0.11  | 1.071 | 3.514 |
| ARHGAP32  | -0.325 | 0.298 | -1.093 | 0.274 | 0.722 | 0.215 | -1.292 | 0.196 | 0.403 | 1.294 |
| ARHGAP29  | -0.072 | 0.295 | -0.243 | 0.808 | 0.931 | 0.275 | -0.252 | 0.801 | 0.522 | 1.66  |
| ARHGAP28  | -0.18  | 0.296 | -0.608 | 0.543 | 0.835 | 0.247 | -0.667 | 0.505 | 0.467 | 1.492 |
| ARHGAP26  | -0.267 | 0.298 | -0.898 | 0.369 | 0.766 | 0.228 | -1.029 | 0.303 | 0.427 | 1.372 |
| ARHGAP25  | -0.459 | 0.301 | -1.525 | 0.127 | 0.632 | 0.19  | -1.935 | 0.053 | 0.351 | 1.14  |
| ARHGAP24  | 0.069  | 0.295 | 0.234  | 0.815 | 1.072 | 0.317 | 0.226  | 0.821 | 0.601 | 1.912 |
| ARHGAP22  | -0.127 | 0.296 | -0.428 | 0.669 | 0.881 | 0.261 | -0.456 | 0.648 | 0.494 | 1.573 |
| ARHGAP19  | -0.508 | 0.3   | -1.696 | 0.09  | 0.602 | 0.18  | -2.21  | 0.027 | 0.334 | 1.082 |
| ARHGAP17  | 0.509  | 0.303 | 1.682  | 0.093 | 1.664 | 0.504 | 1.318  | 0.188 | 0.919 | 3.013 |

|           |        |       |        |       |       |       |        |       |       |       |
|-----------|--------|-------|--------|-------|-------|-------|--------|-------|-------|-------|
| ARHGAP12  | -0.2   | 0.296 | -0.676 | 0.499 | 0.819 | 0.242 | -0.748 | 0.454 | 0.458 | 1.463 |
| ARHGAP11A | 0.691  | 0.31  | 2.229  | 0.026 | 1.995 | 0.618 | 1.61   | 0.107 | 1.087 | 3.661 |
| ARHGAP10  | 0.111  | 0.295 | 0.377  | 0.706 | 1.118 | 0.33  | 0.357  | 0.721 | 0.627 | 1.994 |
| ARHGAP1   | -0.036 | 0.295 | -0.121 | 0.903 | 0.965 | 0.285 | -0.124 | 0.902 | 0.541 | 1.72  |
| ARGLU1    | 0.152  | 0.298 | 0.511  | 0.609 | 1.164 | 0.347 | 0.474  | 0.636 | 0.649 | 2.088 |
| ARG2      | 0.84   | 0.315 | 2.667  | 0.008 | 2.315 | 0.729 | 1.804  | 0.071 | 1.249 | 4.292 |
| ARG1      | -0.444 | 0.298 | -1.487 | 0.137 | 0.642 | 0.191 | -1.872 | 0.061 | 0.357 | 1.151 |
| ARFRP1    | 0.351  | 0.301 | 1.165  | 0.244 | 1.42  | 0.428 | 0.983  | 0.326 | 0.787 | 2.563 |
| ARFIP2    | -0.581 | 0.303 | -1.914 | 0.056 | 0.559 | 0.17  | -2.596 | 0.009 | 0.309 | 1.014 |
| ARFIP1    | 0.437  | 0.299 | 1.463  | 0.144 | 1.548 | 0.462 | 1.185  | 0.236 | 0.862 | 2.779 |
| ARFGEF2   | -0.402 | 0.299 | -1.346 | 0.178 | 0.669 | 0.2   | -1.657 | 0.098 | 0.373 | 1.201 |
| ARFGEF1   | -0.245 | 0.298 | -0.824 | 0.41  | 0.782 | 0.233 | -0.934 | 0.35  | 0.436 | 1.403 |
| ARFGAP3   | -0.212 | 0.298 | -0.712 | 0.477 | 0.809 | 0.241 | -0.793 | 0.428 | 0.451 | 1.451 |
| ARFGAP2   | -0.627 | 0.31  | -2.024 | 0.043 | 0.534 | 0.165 | -2.814 | 0.005 | 0.291 | 0.98  |
| ARFGAP1   | 0.484  | 0.306 | 1.583  | 0.113 | 1.623 | 0.497 | 1.255  | 0.21  | 0.891 | 2.956 |
| ARF6      | 0.663  | 0.306 | 2.166  | 0.03  | 1.94  | 0.593 | 1.584  | 0.113 | 1.065 | 3.533 |
| ARF5      | 0.398  | 0.3   | 1.325  | 0.185 | 1.489 | 0.447 | 1.093  | 0.275 | 0.826 | 2.683 |
| ARF4      | -0.364 | 0.298 | -1.224 | 0.221 | 0.695 | 0.207 | -1.476 | 0.14  | 0.388 | 1.245 |
| ARF3      | -0.625 | 0.304 | -2.057 | 0.04  | 0.535 | 0.163 | -2.857 | 0.004 | 0.295 | 0.971 |
| AREL1     | -0.41  | 0.299 | -1.372 | 0.17  | 0.663 | 0.198 | -1.697 | 0.09  | 0.369 | 1.192 |
| AREG      | -0.523 | 0.306 | -1.708 | 0.088 | 0.593 | 0.181 | -2.244 | 0.025 | 0.325 | 1.08  |
| ARCN1     | -0.502 | 0.302 | -1.66  | 0.097 | 0.605 | 0.183 | -2.155 | 0.031 | 0.335 | 1.095 |
| ARC       | 0.008  | 0.296 | 0.027  | 0.978 | 1.008 | 0.298 | 0.027  | 0.978 | 0.564 | 1.801 |
| ARAP3     | -0.005 | 0.295 | -0.017 | 0.986 | 0.995 | 0.293 | -0.017 | 0.986 | 0.558 | 1.774 |
| ARAP1     | 0.233  | 0.296 | 0.786  | 0.432 | 1.262 | 0.374 | 0.701  | 0.483 | 0.706 | 2.255 |
| ARAF      | -0.117 | 0.295 | -0.396 | 0.692 | 0.89  | 0.263 | -0.42  | 0.675 | 0.499 | 1.587 |
| AR        | -0.011 | 0.295 | -0.036 | 0.971 | 0.989 | 0.292 | -0.036 | 0.971 | 0.555 | 1.764 |
| AQR       | -0.462 | 0.302 | -1.53  | 0.126 | 0.63  | 0.19  | -1.945 | 0.052 | 0.348 | 1.139 |
| AQP9      | 0.735  | 0.31  | 2.372  | 0.018 | 2.085 | 0.646 | 1.68   | 0.093 | 1.136 | 3.826 |
| AQP8      | 0.375  | 0.304 | 1.235  | 0.217 | 1.455 | 0.442 | 1.03   | 0.303 | 0.802 | 2.64  |
| AQP6      | 0.508  | 0.302 | 1.68   | 0.093 | 1.662 | 0.502 | 1.318  | 0.188 | 0.919 | 3.006 |
| AQP5      | -0.086 | 0.295 | -0.291 | 0.771 | 0.918 | 0.271 | -0.304 | 0.761 | 0.514 | 1.637 |
| AQP4      | 0.302  | 0.296 | 1.021  | 0.307 | 1.353 | 0.401 | 0.881  | 0.378 | 0.757 | 2.418 |
| AQP3      | -0.328 | 0.299 | -1.095 | 0.273 | 0.72  | 0.216 | -1.296 | 0.195 | 0.401 | 1.296 |
| AQP2      | 0.554  | 0.306 | 1.809  | 0.07  | 1.74  | 0.533 | 1.389  | 0.165 | 0.955 | 3.171 |
| AQP1      | -0.41  | 0.3   | -1.368 | 0.171 | 0.664 | 0.199 | -1.691 | 0.091 | 0.369 | 1.194 |
| APTX      | 0.36   | 0.298 | 1.208  | 0.227 | 1.433 | 0.427 | 1.015  | 0.31  | 0.799 | 2.568 |
| APRT      | 0.363  | 0.298 | 1.218  | 0.223 | 1.437 | 0.428 | 1.022  | 0.307 | 0.802 | 2.577 |

|          |        |       |        |       |       |       |        |       |       |       |
|----------|--------|-------|--------|-------|-------|-------|--------|-------|-------|-------|
| APPL2    | -1.153 | 0.33  | -3.493 | 0     | 0.316 | 0.104 | -6.567 | 0     | 0.165 | 0.603 |
| APPL1    | -0.229 | 0.299 | -0.766 | 0.444 | 0.795 | 0.238 | -0.861 | 0.389 | 0.442 | 1.43  |
| APPBP2   | 0.116  | 0.295 | 0.391  | 0.696 | 1.122 | 0.332 | 0.369  | 0.712 | 0.629 | 2.003 |
| APP      | -0.297 | 0.298 | -0.998 | 0.318 | 0.743 | 0.221 | -1.162 | 0.245 | 0.414 | 1.332 |
| APOOL    | 0.421  | 0.299 | 1.408  | 0.159 | 1.523 | 0.456 | 1.149  | 0.25  | 0.848 | 2.737 |
| APOO     | 0.017  | 0.296 | 0.056  | 0.955 | 1.017 | 0.301 | 0.056  | 0.956 | 0.57  | 1.815 |
| APOM     | 0.399  | 0.298 | 1.34   | 0.18  | 1.491 | 0.444 | 1.105  | 0.269 | 0.831 | 2.674 |
| APOLD1   | 0.219  | 0.297 | 0.736  | 0.461 | 1.245 | 0.37  | 0.661  | 0.508 | 0.695 | 2.229 |
| APOL6    | 0.182  | 0.297 | 0.614  | 0.539 | 1.2   | 0.356 | 0.561  | 0.574 | 0.671 | 2.148 |
| APOL5    | 0.031  | 0.296 | 0.105  | 0.916 | 1.032 | 0.305 | 0.103  | 0.918 | 0.577 | 1.843 |
| APOL3    | -0.219 | 0.297 | -0.738 | 0.46  | 0.803 | 0.238 | -0.825 | 0.409 | 0.449 | 1.437 |
| APOL2    | -0.034 | 0.295 | -0.116 | 0.907 | 0.966 | 0.285 | -0.119 | 0.906 | 0.541 | 1.724 |
| APOL1    | -0.477 | 0.3   | -1.587 | 0.112 | 0.621 | 0.186 | -2.034 | 0.042 | 0.345 | 1.118 |
| APOH     | -0.029 | 0.295 | -0.099 | 0.921 | 0.971 | 0.287 | -0.1   | 0.92  | 0.545 | 1.732 |
| APOF     | 0.566  | 0.306 | 1.852  | 0.064 | 1.762 | 0.539 | 1.414  | 0.157 | 0.968 | 3.208 |
| APOE     | 0.363  | 0.3   | 1.21   | 0.226 | 1.437 | 0.431 | 1.015  | 0.31  | 0.799 | 2.587 |
| APOD     | 0.034  | 0.297 | 0.113  | 0.91  | 1.034 | 0.307 | 0.111  | 0.911 | 0.578 | 1.849 |
| APOC3    | 0.756  | 0.31  | 2.439  | 0.015 | 2.131 | 0.661 | 1.711  | 0.087 | 1.16  | 3.913 |
| APOC1    | 0.459  | 0.3   | 1.527  | 0.127 | 1.582 | 0.475 | 1.225  | 0.221 | 0.878 | 2.849 |
| APOBR    | -0.272 | 0.298 | -0.914 | 0.361 | 0.762 | 0.227 | -1.05  | 0.294 | 0.425 | 1.365 |
| APOBEC3G | -0.263 | 0.298 | -0.884 | 0.377 | 0.768 | 0.229 | -1.011 | 0.312 | 0.428 | 1.378 |
| APOBEC3F | 0.166  | 0.301 | 0.552  | 0.581 | 1.181 | 0.355 | 0.508  | 0.611 | 0.655 | 2.13  |
| APOBEC3C | -0.119 | 0.295 | -0.404 | 0.686 | 0.888 | 0.262 | -0.429 | 0.668 | 0.498 | 1.583 |
| APOBEC3B | 0.996  | 0.321 | 3.104  | 0.002 | 2.706 | 0.868 | 1.966  | 0.049 | 1.443 | 5.075 |
| APOBEC2  | -0.009 | 0.295 | -0.031 | 0.975 | 0.991 | 0.292 | -0.031 | 0.975 | 0.556 | 1.767 |
| APOBEC1  | -0.026 | 0.295 | -0.088 | 0.929 | 0.974 | 0.288 | -0.09  | 0.929 | 0.546 | 1.738 |
| APOB     | -0.061 | 0.295 | -0.206 | 0.837 | 0.941 | 0.278 | -0.213 | 0.832 | 0.527 | 1.679 |
| APOA4    | -0.004 | 0.296 | -0.014 | 0.989 | 0.996 | 0.295 | -0.014 | 0.988 | 0.557 | 1.78  |
| APOA2    | -0.016 | 0.295 | -0.055 | 0.956 | 0.984 | 0.29  | -0.056 | 0.955 | 0.552 | 1.754 |
| APOA1    | 0.637  | 0.306 | 2.08   | 0.038 | 1.891 | 0.579 | 1.538  | 0.124 | 1.037 | 3.446 |
| APMAP    | -0.298 | 0.298 | -1     | 0.317 | 0.743 | 0.221 | -1.164 | 0.244 | 0.414 | 1.331 |
| APLP2    | -0.737 | 0.31  | -2.377 | 0.017 | 0.479 | 0.148 | -3.514 | 0     | 0.261 | 0.879 |
| APLP1    | 0.129  | 0.297 | 0.434  | 0.664 | 1.138 | 0.338 | 0.407  | 0.684 | 0.636 | 2.036 |
| APLNR    | 0.225  | 0.298 | 0.757  | 0.449 | 1.253 | 0.373 | 0.678  | 0.498 | 0.699 | 2.245 |
| APIP     | 0.327  | 0.298 | 1.097  | 0.273 | 1.386 | 0.413 | 0.936  | 0.349 | 0.773 | 2.484 |
| API5     | 0.217  | 0.299 | 0.727  | 0.467 | 1.242 | 0.371 | 0.653  | 0.514 | 0.692 | 2.23  |
| APH1B    | -0.186 | 0.298 | -0.624 | 0.532 | 0.83  | 0.247 | -0.686 | 0.493 | 0.463 | 1.489 |
| APH1A    | 0.57   | 0.302 | 1.888  | 0.059 | 1.769 | 0.534 | 1.439  | 0.15  | 0.978 | 3.197 |

|         |        |       |        |       |       |       |        |       |       |       |
|---------|--------|-------|--------|-------|-------|-------|--------|-------|-------|-------|
| APEX2   | 0.271  | 0.301 | 0.901  | 0.367 | 1.312 | 0.395 | 0.789  | 0.43  | 0.727 | 2.368 |
| APEX1   | 0.266  | 0.297 | 0.897  | 0.37  | 1.305 | 0.387 | 0.788  | 0.431 | 0.729 | 2.335 |
| APEH    | -0.106 | 0.297 | -0.356 | 0.722 | 0.9   | 0.267 | -0.376 | 0.707 | 0.503 | 1.609 |
| APCS    | 0.109  | 0.296 | 0.369  | 0.712 | 1.115 | 0.33  | 0.349  | 0.727 | 0.625 | 1.991 |
| APC2    | 0.33   | 0.296 | 1.114  | 0.265 | 1.391 | 0.412 | 0.949  | 0.343 | 0.778 | 2.488 |
| APC     | 0.289  | 0.296 | 0.974  | 0.33  | 1.335 | 0.396 | 0.846  | 0.398 | 0.747 | 2.387 |
| APBB2   | -0.303 | 0.298 | -1.016 | 0.309 | 0.739 | 0.22  | -1.187 | 0.235 | 0.412 | 1.324 |
| APBB1IP | -0.444 | 0.3   | -1.482 | 0.138 | 0.641 | 0.192 | -1.866 | 0.062 | 0.356 | 1.154 |
| APBB1   | -0.292 | 0.298 | -0.979 | 0.327 | 0.747 | 0.222 | -1.137 | 0.255 | 0.417 | 1.339 |
| APBA3   | 0.054  | 0.298 | 0.183  | 0.855 | 1.056 | 0.314 | 0.178  | 0.859 | 0.589 | 1.892 |
| APBA2   | -0.118 | 0.296 | -0.398 | 0.691 | 0.889 | 0.263 | -0.422 | 0.673 | 0.498 | 1.588 |
| APBA1   | 0.273  | 0.297 | 0.919  | 0.358 | 1.314 | 0.39  | 0.805  | 0.421 | 0.734 | 2.352 |
| APAF1   | 0.464  | 0.3   | 1.548  | 0.122 | 1.59  | 0.476 | 1.239  | 0.215 | 0.884 | 2.861 |
| AP5S1   | -0.062 | 0.295 | -0.21  | 0.833 | 0.94  | 0.277 | -0.217 | 0.828 | 0.527 | 1.676 |
| AP5M1   | -0.044 | 0.295 | -0.148 | 0.882 | 0.957 | 0.283 | -0.151 | 0.88  | 0.537 | 1.708 |
| AP4S1   | -0.342 | 0.301 | -1.137 | 0.255 | 0.71  | 0.214 | -1.356 | 0.175 | 0.394 | 1.281 |
| AP4M1   | -0.005 | 0.297 | -0.016 | 0.987 | 0.995 | 0.296 | -0.016 | 0.987 | 0.556 | 1.783 |
| AP4E1   | -0.072 | 0.295 | -0.243 | 0.808 | 0.931 | 0.275 | -0.252 | 0.801 | 0.522 | 1.66  |
| AP3S1   | -0.162 | 0.296 | -0.548 | 0.584 | 0.85  | 0.252 | -0.595 | 0.552 | 0.476 | 1.519 |
| AP3M2   | -0.077 | 0.297 | -0.259 | 0.795 | 0.926 | 0.275 | -0.269 | 0.788 | 0.518 | 1.657 |
| AP3D1   | -0.01  | 0.296 | -0.034 | 0.973 | 0.99  | 0.293 | -0.034 | 0.973 | 0.555 | 1.767 |
| AP3B2   | 0.057  | 0.295 | 0.193  | 0.847 | 1.059 | 0.313 | 0.187  | 0.852 | 0.593 | 1.888 |
| AP3B1   | -1.049 | 0.322 | -3.252 | 0.001 | 0.35  | 0.113 | -5.748 | 0     | 0.186 | 0.659 |
| AP2S1   | 0.397  | 0.299 | 1.325  | 0.185 | 1.487 | 0.445 | 1.094  | 0.274 | 0.827 | 2.673 |
| AP2M1   | 0.133  | 0.296 | 0.449  | 0.653 | 1.143 | 0.339 | 0.421  | 0.674 | 0.639 | 2.043 |
| AP2B1   | -0.151 | 0.296 | -0.509 | 0.611 | 0.86  | 0.255 | -0.549 | 0.583 | 0.481 | 1.537 |
| AP2A2   | -0.707 | 0.31  | -2.284 | 0.022 | 0.493 | 0.153 | -3.321 | 0.001 | 0.269 | 0.905 |
| AP1S2   | -0.008 | 0.295 | -0.027 | 0.979 | 0.992 | 0.293 | -0.027 | 0.978 | 0.556 | 1.769 |
| AP1S1   | 0.312  | 0.3   | 1.041  | 0.298 | 1.366 | 0.41  | 0.894  | 0.371 | 0.759 | 2.459 |
| AP1M2   | 0.069  | 0.296 | 0.233  | 0.816 | 1.071 | 0.317 | 0.225  | 0.822 | 0.6   | 1.914 |
| AP1G2   | 0.185  | 0.296 | 0.623  | 0.533 | 1.203 | 0.356 | 0.569  | 0.569 | 0.673 | 2.149 |
| AP1G1   | 0.526  | 0.302 | 1.74   | 0.082 | 1.692 | 0.511 | 1.353  | 0.176 | 0.936 | 3.059 |
| AP1B1   | 0.709  | 0.306 | 2.319  | 0.02  | 2.033 | 0.622 | 1.661  | 0.097 | 1.116 | 3.702 |
| AP1AR   | -0.005 | 0.295 | -0.018 | 0.985 | 0.995 | 0.294 | -0.018 | 0.985 | 0.558 | 1.774 |
| AOX1    | -0.546 | 0.303 | -1.803 | 0.071 | 0.579 | 0.175 | -2.399 | 0.016 | 0.32  | 1.049 |
| AOPEP   | -0.304 | 0.297 | -1.025 | 0.306 | 0.738 | 0.219 | -1.197 | 0.231 | 0.413 | 1.32  |
| AOC4P   | 0.631  | 0.306 | 2.063  | 0.039 | 1.879 | 0.574 | 1.53   | 0.126 | 1.032 | 3.421 |
| AOC3    | 0.316  | 0.298 | 1.062  | 0.288 | 1.372 | 0.409 | 0.91   | 0.363 | 0.765 | 2.459 |



|            |        |       |        |       |       |       |        |       |       |       |
|------------|--------|-------|--------|-------|-------|-------|--------|-------|-------|-------|
| AOC2       | 0.23   | 0.298 | 0.771  | 0.441 | 1.258 | 0.375 | 0.689  | 0.491 | 0.702 | 2.256 |
| AOC1       | 0.558  | 0.306 | 1.826  | 0.068 | 1.747 | 0.534 | 1.399  | 0.162 | 0.96  | 3.181 |
| AOAH       | -0.326 | 0.3   | -1.086 | 0.277 | 0.722 | 0.217 | -1.284 | 0.199 | 0.401 | 1.3   |
| ANXA9      | 0.203  | 0.298 | 0.681  | 0.496 | 1.225 | 0.365 | 0.617  | 0.538 | 0.683 | 2.198 |
| ANXA7      | 0.229  | 0.297 | 0.771  | 0.441 | 1.257 | 0.373 | 0.689  | 0.491 | 0.703 | 2.249 |
| ANXA6      | -0.093 | 0.296 | -0.313 | 0.754 | 0.911 | 0.27  | -0.328 | 0.743 | 0.51  | 1.628 |
| ANXA5      | 0.036  | 0.296 | 0.12   | 0.904 | 1.036 | 0.306 | 0.118  | 0.906 | 0.58  | 1.85  |
| ANXA4      | -0.397 | 0.3   | -1.325 | 0.185 | 0.672 | 0.201 | -1.627 | 0.104 | 0.374 | 1.209 |
| ANXA3      | 0.017  | 0.296 | 0.059  | 0.953 | 1.018 | 0.301 | 0.058  | 0.954 | 0.57  | 1.816 |
| ANXA2P3    | 0.137  | 0.295 | 0.465  | 0.642 | 1.147 | 0.339 | 0.434  | 0.664 | 0.643 | 2.046 |
| ANXA2P2    | -0.115 | 0.296 | -0.39  | 0.697 | 0.891 | 0.264 | -0.413 | 0.679 | 0.499 | 1.592 |
| ANXA2P1    | 0.399  | 0.299 | 1.338  | 0.181 | 1.491 | 0.445 | 1.103  | 0.27  | 0.831 | 2.677 |
| ANXA2      | 0.35   | 0.296 | 1.179  | 0.238 | 1.418 | 0.421 | 0.995  | 0.32  | 0.793 | 2.536 |
| ANXA13     | -0.379 | 0.3   | -1.264 | 0.206 | 0.685 | 0.205 | -1.536 | 0.124 | 0.381 | 1.232 |
| ANXA11     | -0.097 | 0.295 | -0.33  | 0.742 | 0.907 | 0.268 | -0.346 | 0.729 | 0.508 | 1.619 |
| ANXA10     | -0.421 | 0.3   | -1.403 | 0.161 | 0.656 | 0.197 | -1.745 | 0.081 | 0.364 | 1.182 |
| ANXA1      | -0.816 | 0.31  | -2.628 | 0.009 | 0.442 | 0.137 | -4.062 | 0     | 0.241 | 0.813 |
| ANTXR1     | -0.375 | 0.3   | -1.252 | 0.21  | 0.687 | 0.206 | -1.52  | 0.129 | 0.382 | 1.236 |
| ANTKMT     | 0.236  | 0.297 | 0.793  | 0.428 | 1.266 | 0.376 | 0.707  | 0.48  | 0.707 | 2.265 |
| ANPEP      | -0.35  | 0.3   | -1.169 | 0.242 | 0.704 | 0.211 | -1.4   | 0.161 | 0.392 | 1.267 |
| ANP32E     | 0.582  | 0.303 | 1.92   | 0.055 | 1.789 | 0.542 | 1.456  | 0.146 | 0.988 | 3.241 |
| ANP32D     | -0.238 | 0.296 | -0.804 | 0.422 | 0.788 | 0.234 | -0.907 | 0.364 | 0.441 | 1.409 |
| ANP32C     | -0.584 | 0.316 | -1.848 | 0.065 | 0.558 | 0.176 | -2.51  | 0.012 | 0.3   | 1.036 |
| ANP32B     | 0.19   | 0.296 | 0.642  | 0.521 | 1.209 | 0.358 | 0.584  | 0.559 | 0.677 | 2.161 |
| ANP32A-IT1 | -0.282 | 0.297 | -0.95  | 0.342 | 0.754 | 0.224 | -1.097 | 0.273 | 0.421 | 1.351 |
| ANP32A     | -0.172 | 0.296 | -0.581 | 0.561 | 0.842 | 0.249 | -0.634 | 0.526 | 0.471 | 1.504 |
| ANOS1      | 0.005  | 0.295 | 0.018  | 0.986 | 1.005 | 0.297 | 0.018  | 0.986 | 0.564 | 1.793 |
| ANO3       | 0.03   | 0.296 | 0.102  | 0.918 | 1.031 | 0.305 | 0.101  | 0.92  | 0.577 | 1.84  |
| ANO2       | 0.192  | 0.296 | 0.647  | 0.517 | 1.211 | 0.358 | 0.589  | 0.556 | 0.678 | 2.163 |
| ANO10      | 0.355  | 0.298 | 1.191  | 0.234 | 1.426 | 0.425 | 1.003  | 0.316 | 0.795 | 2.556 |
| ANO1       | -0.63  | 0.306 | -2.061 | 0.039 | 0.533 | 0.163 | -2.871 | 0.004 | 0.293 | 0.97  |
| ANKZF1     | -0.511 | 0.302 | -1.69  | 0.091 | 0.6   | 0.181 | -2.207 | 0.027 | 0.332 | 1.085 |
| ANKS1B     | -0.529 | 0.306 | -1.731 | 0.083 | 0.589 | 0.18  | -2.282 | 0.022 | 0.323 | 1.072 |
| ANKS1A     | 0.427  | 0.3   | 1.425  | 0.154 | 1.533 | 0.46  | 1.16   | 0.246 | 0.852 | 2.759 |
| ANKRD7     | 0.569  | 0.303 | 1.877  | 0.061 | 1.766 | 0.535 | 1.431  | 0.152 | 0.975 | 3.197 |
| ANKRD6     | -0.232 | 0.296 | -0.783 | 0.434 | 0.793 | 0.235 | -0.881 | 0.378 | 0.444 | 1.417 |
| ANKRD55    | 0.273  | 0.297 | 0.919  | 0.358 | 1.314 | 0.391 | 0.804  | 0.421 | 0.734 | 2.355 |
| ANKRD53    | 0.1    | 0.297 | 0.338  | 0.735 | 1.106 | 0.328 | 0.322  | 0.747 | 0.618 | 1.977 |

|             |        |       |        |       |       |       |        |       |       |       |
|-------------|--------|-------|--------|-------|-------|-------|--------|-------|-------|-------|
| ANKRD49     | -0.278 | 0.298 | -0.933 | 0.351 | 0.757 | 0.225 | -1.076 | 0.282 | 0.423 | 1.358 |
| ANKRD46     | 0.24   | 0.296 | 0.811  | 0.417 | 1.271 | 0.377 | 0.721  | 0.471 | 0.712 | 2.272 |
| ANKRD40CL   | 0.226  | 0.296 | 0.763  | 0.445 | 1.254 | 0.372 | 0.683  | 0.495 | 0.701 | 2.242 |
| ANKRD40     | 0.41   | 0.3   | 1.368  | 0.171 | 1.507 | 0.452 | 1.123  | 0.262 | 0.838 | 2.712 |
| ANKRD36BP2  | -0.102 | 0.296 | -0.345 | 0.73  | 0.903 | 0.268 | -0.363 | 0.717 | 0.505 | 1.614 |
| ANKRD36B    | 0.433  | 0.303 | 1.43   | 0.153 | 1.542 | 0.467 | 1.161  | 0.246 | 0.852 | 2.791 |
| ANKRD36     | 0.377  | 0.298 | 1.265  | 0.206 | 1.458 | 0.435 | 1.054  | 0.292 | 0.813 | 2.615 |
| ANKRD34C    | 0.092  | 0.296 | 0.31   | 0.756 | 1.096 | 0.324 | 0.296  | 0.767 | 0.614 | 1.957 |
| ANKRD28     | -0.249 | 0.298 | -0.836 | 0.403 | 0.78  | 0.232 | -0.95  | 0.342 | 0.435 | 1.397 |
| ANKRD27     | 0.327  | 0.301 | 1.088  | 0.276 | 1.387 | 0.417 | 0.928  | 0.353 | 0.77  | 2.5   |
| ANKRD26     | 0.301  | 0.299 | 1.005  | 0.315 | 1.351 | 0.405 | 0.868  | 0.386 | 0.751 | 2.43  |
| ANKRD2      | 0.315  | 0.299 | 1.054  | 0.292 | 1.37  | 0.409 | 0.904  | 0.366 | 0.763 | 2.461 |
| ANKRD17     | 0.418  | 0.303 | 1.379  | 0.168 | 1.519 | 0.46  | 1.127  | 0.26  | 0.839 | 2.749 |
| ANKRD12     | -0.463 | 0.302 | -1.531 | 0.126 | 0.629 | 0.19  | -1.947 | 0.052 | 0.348 | 1.139 |
| ANKRD11     | 0.454  | 0.302 | 1.501  | 0.133 | 1.574 | 0.476 | 1.206  | 0.228 | 0.87  | 2.848 |
| ANKRD10-IT1 | 0.081  | 0.297 | 0.272  | 0.786 | 1.084 | 0.322 | 0.261  | 0.794 | 0.606 | 1.941 |
| ANKRD10     | 0.016  | 0.295 | 0.055  | 0.956 | 1.016 | 0.3   | 0.054  | 0.957 | 0.57  | 1.814 |
| ANKRD1      | -0.113 | 0.298 | -0.38  | 0.704 | 0.893 | 0.266 | -0.402 | 0.688 | 0.498 | 1.602 |
| ANKRA2      | -0.618 | 0.31  | -1.995 | 0.046 | 0.539 | 0.167 | -2.762 | 0.006 | 0.294 | 0.989 |
| ANKMY2      | -0.079 | 0.297 | -0.266 | 0.79  | 0.924 | 0.274 | -0.277 | 0.782 | 0.517 | 1.653 |
| ANKMY1      | -0.138 | 0.295 | -0.468 | 0.64  | 0.871 | 0.257 | -0.502 | 0.615 | 0.488 | 1.554 |
| ANKLE2      | -0.583 | 0.31  | -1.881 | 0.06  | 0.558 | 0.173 | -2.554 | 0.011 | 0.304 | 1.025 |
| ANKH        | -0.292 | 0.298 | -0.981 | 0.327 | 0.747 | 0.222 | -1.139 | 0.255 | 0.417 | 1.338 |
| ANKFY1      | 0.076  | 0.295 | 0.258  | 0.796 | 1.079 | 0.318 | 0.249  | 0.804 | 0.605 | 1.924 |
| ANKEF1      | -0.072 | 0.297 | -0.243 | 0.808 | 0.93  | 0.276 | -0.252 | 0.801 | 0.52  | 1.665 |
| ANK3        | 0.182  | 0.296 | 0.614  | 0.539 | 1.199 | 0.355 | 0.561  | 0.575 | 0.671 | 2.144 |
| ANK2        | -0.403 | 0.298 | -1.354 | 0.176 | 0.668 | 0.199 | -1.667 | 0.095 | 0.373 | 1.198 |
| ANK1        | 0.142  | 0.297 | 0.478  | 0.632 | 1.152 | 0.342 | 0.446  | 0.656 | 0.644 | 2.061 |
| ANGPTL8     | 0.084  | 0.296 | 0.285  | 0.776 | 1.088 | 0.322 | 0.273  | 0.784 | 0.609 | 1.942 |
| ANGPTL7     | 0.129  | 0.295 | 0.437  | 0.662 | 1.138 | 0.336 | 0.41   | 0.682 | 0.638 | 2.03  |
| ANGPTL4     | 0.787  | 0.31  | 2.535  | 0.011 | 2.196 | 0.681 | 1.755  | 0.079 | 1.195 | 4.034 |
| ANGPTL3     | 0.221  | 0.296 | 0.75   | 0.454 | 1.248 | 0.369 | 0.672  | 0.501 | 0.699 | 2.227 |
| ANGPTL2     | -0.371 | 0.298 | -1.247 | 0.212 | 0.69  | 0.205 | -1.51  | 0.131 | 0.385 | 1.237 |
| ANGPT4      | 0.212  | 0.298 | 0.713  | 0.476 | 1.237 | 0.368 | 0.643  | 0.52  | 0.69  | 2.217 |
| ANGPT2      | 0.088  | 0.295 | 0.299  | 0.765 | 1.092 | 0.323 | 0.286  | 0.775 | 0.612 | 1.949 |
| ANGPT1      | 0.2    | 0.298 | 0.67   | 0.503 | 1.221 | 0.364 | 0.608  | 0.543 | 0.681 | 2.19  |
| ANGEL2      | -0.199 | 0.296 | -0.674 | 0.501 | 0.819 | 0.243 | -0.745 | 0.456 | 0.458 | 1.464 |
| ANGEL1      | -0.811 | 0.31  | -2.612 | 0.009 | 0.444 | 0.138 | -4.026 | 0     | 0.242 | 0.817 |

|         |        |       |        |       |       |       |        |       |       |       |
|---------|--------|-------|--------|-------|-------|-------|--------|-------|-------|-------|
| ANG     | -0.435 | 0.302 | -1.439 | 0.15  | 0.647 | 0.196 | -1.803 | 0.071 | 0.358 | 1.171 |
| ANAPC5  | -0.115 | 0.296 | -0.389 | 0.697 | 0.891 | 0.264 | -0.412 | 0.68  | 0.499 | 1.591 |
| ANAPC2  | -0.205 | 0.296 | -0.692 | 0.489 | 0.815 | 0.241 | -0.768 | 0.442 | 0.456 | 1.456 |
| ANAPC15 | 0.478  | 0.302 | 1.581  | 0.114 | 1.612 | 0.487 | 1.257  | 0.209 | 0.892 | 2.915 |
| ANAPC13 | -0.026 | 0.295 | -0.089 | 0.929 | 0.974 | 0.288 | -0.09  | 0.928 | 0.546 | 1.738 |
| ANAPC10 | 0.649  | 0.303 | 2.139  | 0.032 | 1.913 | 0.58  | 1.573  | 0.116 | 1.056 | 3.467 |
| AMZ2    | 0.243  | 0.298 | 0.816  | 0.414 | 1.275 | 0.379 | 0.725  | 0.469 | 0.712 | 2.284 |
| AMT     | 0.502  | 0.306 | 1.643  | 0.1   | 1.653 | 0.505 | 1.292  | 0.196 | 0.908 | 3.009 |
| AMPH    | -0.608 | 0.303 | -2.005 | 0.045 | 0.545 | 0.165 | -2.759 | 0.006 | 0.301 | 0.986 |
| AMPD3   | 0.183  | 0.296 | 0.619  | 0.536 | 1.201 | 0.356 | 0.565  | 0.572 | 0.672 | 2.148 |
| AMPD2   | -0.024 | 0.296 | -0.082 | 0.935 | 0.976 | 0.289 | -0.083 | 0.934 | 0.547 | 1.743 |
| AMPD1   | -0.468 | 0.3   | -1.561 | 0.118 | 0.626 | 0.188 | -1.991 | 0.046 | 0.348 | 1.127 |
| AMOTL2  | -0.068 | 0.295 | -0.23  | 0.818 | 0.934 | 0.276 | -0.238 | 0.812 | 0.524 | 1.666 |
| AMOT    | -0.027 | 0.296 | -0.09  | 0.928 | 0.974 | 0.288 | -0.091 | 0.927 | 0.545 | 1.74  |
| AMN     | 0.639  | 0.303 | 2.106  | 0.035 | 1.895 | 0.575 | 1.556  | 0.12  | 1.045 | 3.434 |
| AMMECR1 | 0.17   | 0.296 | 0.574  | 0.566 | 1.185 | 0.351 | 0.528  | 0.598 | 0.663 | 2.118 |
| AMIGO2  | -0.545 | 0.303 | -1.801 | 0.072 | 0.58  | 0.175 | -2.395 | 0.017 | 0.32  | 1.049 |
| AMHR2   | -0.032 | 0.296 | -0.108 | 0.914 | 0.969 | 0.287 | -0.109 | 0.913 | 0.542 | 1.73  |
| AMFR    | -0.383 | 0.3   | -1.279 | 0.201 | 0.682 | 0.204 | -1.558 | 0.119 | 0.379 | 1.227 |
| AMELY   | 0.438  | 0.3   | 1.46   | 0.144 | 1.549 | 0.465 | 1.182  | 0.237 | 0.861 | 2.789 |
| AMELX   | 0.756  | 0.308 | 2.45   | 0.014 | 2.129 | 0.657 | 1.719  | 0.086 | 1.163 | 3.897 |
| AMD1    | 0.192  | 0.299 | 0.641  | 0.522 | 1.211 | 0.362 | 0.583  | 0.56  | 0.674 | 2.176 |
| AMBRA1  | 0.252  | 0.297 | 0.85   | 0.395 | 1.287 | 0.382 | 0.751  | 0.452 | 0.719 | 2.302 |
| AMBP    | -0.42  | 0.299 | -1.407 | 0.159 | 0.657 | 0.196 | -1.749 | 0.08  | 0.366 | 1.179 |
| AMBN    | -0.805 | 0.31  | -2.594 | 0.009 | 0.447 | 0.139 | -3.986 | 0     | 0.243 | 0.821 |
| AMACR   | 0.541  | 0.301 | 1.798  | 0.072 | 1.718 | 0.517 | 1.388  | 0.165 | 0.952 | 3.099 |
| ALX4    | 0.352  | 0.3   | 1.174  | 0.241 | 1.421 | 0.426 | 0.99   | 0.322 | 0.79  | 2.557 |
| ALX3    | 0.037  | 0.297 | 0.124  | 0.901 | 1.038 | 0.308 | 0.122  | 0.903 | 0.58  | 1.857 |
| ALX1    | -0.065 | 0.295 | -0.22  | 0.826 | 0.937 | 0.277 | -0.228 | 0.82  | 0.525 | 1.671 |
| ALS2CL  | 0.196  | 0.299 | 0.655  | 0.512 | 1.216 | 0.363 | 0.595  | 0.552 | 0.677 | 2.184 |
| ALPP    | 0.226  | 0.297 | 0.762  | 0.446 | 1.254 | 0.372 | 0.682  | 0.495 | 0.701 | 2.243 |
| ALPL    | -0.141 | 0.296 | -0.476 | 0.634 | 0.869 | 0.257 | -0.511 | 0.609 | 0.486 | 1.552 |
| ALPK3   | -0.797 | 0.312 | -2.558 | 0.011 | 0.451 | 0.14  | -3.912 | 0     | 0.245 | 0.83  |
| ALPK1   | -0.193 | 0.295 | -0.653 | 0.514 | 0.824 | 0.244 | -0.721 | 0.471 | 0.462 | 1.471 |
| ALPI    | -0.013 | 0.295 | -0.045 | 0.964 | 0.987 | 0.291 | -0.045 | 0.964 | 0.553 | 1.76  |
| ALPG    | -0.112 | 0.296 | -0.379 | 0.705 | 0.894 | 0.265 | -0.401 | 0.688 | 0.5   | 1.598 |
| ALOXE3  | 0.33   | 0.3   | 1.098  | 0.272 | 1.39  | 0.417 | 0.935  | 0.35  | 0.772 | 2.504 |
| ALOX5AP | -0.223 | 0.298 | -0.749 | 0.454 | 0.8   | 0.238 | -0.839 | 0.401 | 0.446 | 1.434 |

|          |        |       |        |       |       |       |        |       |       |       |
|----------|--------|-------|--------|-------|-------|-------|--------|-------|-------|-------|
| ALOX5    | 0.095  | 0.295 | 0.322  | 0.747 | 1.1   | 0.325 | 0.307  | 0.759 | 0.617 | 1.962 |
| ALOX15B  | -0.25  | 0.296 | -0.842 | 0.4   | 0.779 | 0.231 | -0.956 | 0.339 | 0.436 | 1.393 |
| ALOX15   | 0.705  | 0.315 | 2.24   | 0.025 | 2.024 | 0.637 | 1.607  | 0.108 | 1.092 | 3.752 |
| ALOX12P2 | -0.31  | 0.298 | -1.04  | 0.298 | 0.733 | 0.219 | -1.219 | 0.223 | 0.409 | 1.316 |
| ALOX12B  | 0.331  | 0.297 | 1.113  | 0.266 | 1.392 | 0.414 | 0.948  | 0.343 | 0.777 | 2.492 |
| ALOX12   | -0.122 | 0.296 | -0.411 | 0.681 | 0.885 | 0.262 | -0.437 | 0.662 | 0.496 | 1.582 |
| ALMS1    | 0.187  | 0.298 | 0.628  | 0.53  | 1.206 | 0.36  | 0.573  | 0.567 | 0.672 | 2.164 |
| ALLC     | -0.223 | 0.296 | -0.754 | 0.451 | 0.8   | 0.237 | -0.845 | 0.398 | 0.448 | 1.429 |
| ALKBH4   | -0.272 | 0.301 | -0.903 | 0.366 | 0.762 | 0.229 | -1.038 | 0.299 | 0.423 | 1.374 |
| ALKBH1   | 0.099  | 0.296 | 0.333  | 0.739 | 1.104 | 0.327 | 0.317  | 0.751 | 0.618 | 1.972 |
| ALK      | 0.547  | 0.306 | 1.789  | 0.074 | 1.728 | 0.528 | 1.378  | 0.168 | 0.949 | 3.144 |
| ALG9     | -0.074 | 0.297 | -0.248 | 0.804 | 0.929 | 0.276 | -0.257 | 0.797 | 0.52  | 1.661 |
| ALG8     | -0.169 | 0.296 | -0.569 | 0.569 | 0.845 | 0.25  | -0.62  | 0.536 | 0.473 | 1.51  |
| ALG6     | -0.104 | 0.296 | -0.35  | 0.726 | 0.902 | 0.266 | -0.369 | 0.712 | 0.505 | 1.609 |
| ALG5     | 0.003  | 0.295 | 0.009  | 0.992 | 1.003 | 0.296 | 0.009  | 0.992 | 0.562 | 1.788 |
| ALG3     | 1.04   | 0.328 | 3.176  | 0.001 | 2.83  | 0.927 | 1.974  | 0.048 | 1.489 | 5.377 |
| ALG13    | -0.616 | 0.31  | -1.989 | 0.047 | 0.54  | 0.167 | -2.75  | 0.006 | 0.294 | 0.991 |
| ALG12    | 0.215  | 0.296 | 0.726  | 0.468 | 1.24  | 0.367 | 0.653  | 0.514 | 0.694 | 2.214 |
| ALDOC    | 0.356  | 0.303 | 1.178  | 0.239 | 1.428 | 0.432 | 0.991  | 0.322 | 0.789 | 2.584 |
| ALDOB    | 0.026  | 0.296 | 0.089  | 0.929 | 1.027 | 0.304 | 0.088  | 0.93  | 0.575 | 1.834 |
| ALDOAP2  | 0.701  | 0.307 | 2.281  | 0.023 | 2.015 | 0.619 | 1.64   | 0.101 | 1.104 | 3.679 |
| ALDOA    | 0.156  | 0.295 | 0.528  | 0.598 | 1.169 | 0.345 | 0.489  | 0.625 | 0.655 | 2.084 |
| ALDH9A1  | -0.207 | 0.298 | -0.695 | 0.487 | 0.813 | 0.242 | -0.773 | 0.44  | 0.453 | 1.457 |
| ALDH8A1  | 0.34   | 0.3   | 1.133  | 0.257 | 1.405 | 0.422 | 0.96   | 0.337 | 0.78  | 2.533 |
| ALDH7A1  | 0.33   | 0.298 | 1.109  | 0.267 | 1.391 | 0.414 | 0.944  | 0.345 | 0.776 | 2.495 |
| ALDH6A1  | 0.046  | 0.296 | 0.156  | 0.876 | 1.047 | 0.31  | 0.153  | 0.879 | 0.587 | 1.87  |
| ALDH5A1  | 0.088  | 0.296 | 0.297  | 0.766 | 1.092 | 0.323 | 0.284  | 0.776 | 0.612 | 1.949 |
| ALDH4A1  | -0.638 | 0.306 | -2.084 | 0.037 | 0.528 | 0.162 | -2.916 | 0.004 | 0.29  | 0.963 |
| ALDH3B2  | 0.362  | 0.3   | 1.207  | 0.227 | 1.437 | 0.431 | 1.013  | 0.311 | 0.798 | 2.587 |
| ALDH3B1  | 0.801  | 0.315 | 2.546  | 0.011 | 2.229 | 0.702 | 1.751  | 0.08  | 1.202 | 4.131 |
| ALDH3A2  | 0.162  | 0.296 | 0.548  | 0.583 | 1.176 | 0.348 | 0.506  | 0.613 | 0.659 | 2.1   |
| ALDH3A1  | 0.322  | 0.297 | 1.087  | 0.277 | 1.38  | 0.409 | 0.929  | 0.353 | 0.772 | 2.469 |
| ALDH2    | -0.183 | 0.297 | -0.616 | 0.538 | 0.833 | 0.247 | -0.676 | 0.499 | 0.466 | 1.49  |
| ALDH1L1  | 0.055  | 0.295 | 0.185  | 0.853 | 1.056 | 0.312 | 0.18   | 0.857 | 0.592 | 1.885 |
| ALDH1B1  | -0.11  | 0.295 | -0.371 | 0.711 | 0.896 | 0.265 | -0.392 | 0.695 | 0.502 | 1.599 |
| ALDH1A3  | -0.311 | 0.298 | -1.045 | 0.296 | 0.733 | 0.218 | -1.226 | 0.22  | 0.409 | 1.313 |
| ALDH1A2  | 0.589  | 0.305 | 1.932  | 0.053 | 1.802 | 0.549 | 1.46   | 0.144 | 0.991 | 3.274 |
| ALDH1A1  | -0.887 | 0.316 | -2.809 | 0.005 | 0.412 | 0.13  | -4.521 | 0     | 0.222 | 0.765 |

|          |        |       |        |       |       |       |        |       |       |       |
|----------|--------|-------|--------|-------|-------|-------|--------|-------|-------|-------|
| ALDH18A1 | -0.396 | 0.3   | -1.322 | 0.186 | 0.673 | 0.202 | -1.622 | 0.105 | 0.374 | 1.211 |
| ALCAM    | -0.357 | 0.3   | -1.19  | 0.234 | 0.7   | 0.21  | -1.43  | 0.153 | 0.389 | 1.26  |
| ALB      | -0.473 | 0.302 | -1.565 | 0.118 | 0.623 | 0.188 | -2.002 | 0.045 | 0.345 | 1.127 |
| ALAS2    | 0.642  | 0.307 | 2.093  | 0.036 | 1.9   | 0.583 | 1.545  | 0.122 | 1.042 | 3.465 |
| ALAS1    | 0.24   | 0.297 | 0.809  | 0.418 | 1.271 | 0.377 | 0.719  | 0.472 | 0.711 | 2.275 |
| ALAD     | -0.496 | 0.306 | -1.618 | 0.106 | 0.609 | 0.187 | -2.095 | 0.036 | 0.334 | 1.11  |
| AKTIP    | 0.125  | 0.296 | 0.424  | 0.672 | 1.133 | 0.335 | 0.398  | 0.691 | 0.635 | 2.023 |
| AKT3     | -0.359 | 0.298 | -1.207 | 0.228 | 0.698 | 0.208 | -1.452 | 0.147 | 0.39  | 1.251 |
| AKT2     | -0.229 | 0.296 | -0.774 | 0.439 | 0.795 | 0.235 | -0.869 | 0.385 | 0.445 | 1.421 |
| AKT1     | -0.189 | 0.296 | -0.638 | 0.523 | 0.828 | 0.245 | -0.703 | 0.482 | 0.464 | 1.479 |
| AKR7A3   | 0.293  | 0.297 | 0.985  | 0.324 | 1.34  | 0.398 | 0.854  | 0.393 | 0.749 | 2.399 |
| AKR7A2   | 0.08   | 0.297 | 0.27   | 0.787 | 1.083 | 0.321 | 0.26   | 0.795 | 0.606 | 1.937 |
| AKR1D1   | -0.089 | 0.295 | -0.3   | 0.764 | 0.915 | 0.27  | -0.314 | 0.754 | 0.513 | 1.633 |
| AKR1C4   | -0.019 | 0.295 | -0.064 | 0.949 | 0.981 | 0.289 | -0.065 | 0.948 | 0.55  | 1.749 |
| AKR1C3   | -0.318 | 0.298 | -1.07  | 0.285 | 0.727 | 0.216 | -1.26  | 0.208 | 0.406 | 1.303 |
| AKR1C2   | 0.158  | 0.296 | 0.533  | 0.594 | 1.171 | 0.347 | 0.493  | 0.622 | 0.655 | 2.093 |
| AKR1C1   | 0.471  | 0.302 | 1.557  | 0.119 | 1.601 | 0.484 | 1.242  | 0.214 | 0.885 | 2.895 |
| AKR1B10  | -0.287 | 0.298 | -0.963 | 0.335 | 0.751 | 0.224 | -1.115 | 0.265 | 0.419 | 1.346 |
| AKR1B1   | -0.484 | 0.3   | -1.611 | 0.107 | 0.616 | 0.185 | -2.072 | 0.038 | 0.342 | 1.11  |
| AKR1A1   | -0.436 | 0.307 | -1.421 | 0.155 | 0.646 | 0.198 | -1.782 | 0.075 | 0.354 | 1.18  |
| AKIRIN2  | 0.074  | 0.295 | 0.252  | 0.801 | 1.077 | 0.318 | 0.242  | 0.808 | 0.604 | 1.922 |
| AKIRIN1  | 0.039  | 0.295 | 0.133  | 0.894 | 1.04  | 0.307 | 0.13   | 0.896 | 0.583 | 1.854 |
| AKIP1    | 0.121  | 0.295 | 0.41   | 0.682 | 1.129 | 0.333 | 0.386  | 0.7   | 0.633 | 2.014 |
| AKAP9    | -0.195 | 0.297 | -0.657 | 0.511 | 0.823 | 0.244 | -0.726 | 0.468 | 0.46  | 1.472 |
| AKAP8L   | 0.224  | 0.297 | 0.756  | 0.45  | 1.251 | 0.371 | 0.677  | 0.498 | 0.7   | 2.237 |
| AKAP8    | 0.346  | 0.3   | 1.155  | 0.248 | 1.414 | 0.424 | 0.976  | 0.329 | 0.786 | 2.544 |
| AKAP7    | -0.522 | 0.302 | -1.727 | 0.084 | 0.593 | 0.179 | -2.269 | 0.023 | 0.328 | 1.073 |
| AKAP6    | -0.007 | 0.296 | -0.023 | 0.981 | 0.993 | 0.294 | -0.023 | 0.981 | 0.556 | 1.774 |
| AKAP5    | 0.114  | 0.296 | 0.383  | 0.702 | 1.12  | 0.332 | 0.362  | 0.717 | 0.627 | 2.002 |
| AKAP4    | 0.934  | 0.328 | 2.85   | 0.004 | 2.544 | 0.833 | 1.852  | 0.064 | 1.338 | 4.834 |
| AKAP3    | -0.325 | 0.299 | -1.087 | 0.277 | 0.723 | 0.216 | -1.284 | 0.199 | 0.402 | 1.298 |
| AKAP17A  | 0.12   | 0.299 | 0.4    | 0.689 | 1.127 | 0.337 | 0.377  | 0.706 | 0.627 | 2.025 |
| AKAP13   | -0.685 | 0.306 | -2.239 | 0.025 | 0.504 | 0.154 | -3.216 | 0.001 | 0.277 | 0.918 |
| AKAP12   | -0.551 | 0.301 | -1.832 | 0.067 | 0.577 | 0.173 | -2.443 | 0.015 | 0.32  | 1.039 |
| AKAP11   | -0.893 | 0.311 | -2.872 | 0.004 | 0.409 | 0.127 | -4.639 | 0     | 0.222 | 0.753 |
| AKAP10   | 0.374  | 0.3   | 1.25   | 0.211 | 1.454 | 0.436 | 1.043  | 0.297 | 0.808 | 2.616 |
| AKAP1    | 0.124  | 0.3   | 0.414  | 0.679 | 1.132 | 0.34  | 0.389  | 0.697 | 0.628 | 2.04  |
| AK6      | 0.287  | 0.297 | 0.967  | 0.334 | 1.332 | 0.395 | 0.841  | 0.401 | 0.745 | 2.384 |

|         |        |       |        |       |       |       |        |       |       |       |
|---------|--------|-------|--------|-------|-------|-------|--------|-------|-------|-------|
| AK5     | -0.887 | 0.321 | -2.763 | 0.006 | 0.412 | 0.132 | -4.448 | 0     | 0.219 | 0.773 |
| AK4     | 0.167  | 0.296 | 0.565  | 0.572 | 1.182 | 0.35  | 0.521  | 0.603 | 0.662 | 2.112 |
| AK2     | -0.241 | 0.3   | -0.803 | 0.422 | 0.786 | 0.236 | -0.908 | 0.364 | 0.436 | 1.416 |
| AK1     | 0.198  | 0.297 | 0.667  | 0.505 | 1.219 | 0.362 | 0.605  | 0.545 | 0.681 | 2.184 |
| AJAP1   | 0.033  | 0.295 | 0.112  | 0.911 | 1.034 | 0.305 | 0.11   | 0.912 | 0.58  | 1.843 |
| AIRE    | -0.114 | 0.296 | -0.387 | 0.699 | 0.892 | 0.264 | -0.41  | 0.682 | 0.499 | 1.593 |
| AIPL1   | 0.15   | 0.296 | 0.507  | 0.612 | 1.162 | 0.344 | 0.471  | 0.638 | 0.651 | 2.075 |
| AIP     | 0.345  | 0.3   | 1.15   | 0.25  | 1.412 | 0.423 | 0.973  | 0.331 | 0.785 | 2.54  |
| AIMP2   | 0.417  | 0.3   | 1.391  | 0.164 | 1.517 | 0.455 | 1.138  | 0.255 | 0.843 | 2.73  |
| AIMP1   | 0.038  | 0.295 | 0.13   | 0.896 | 1.039 | 0.307 | 0.128  | 0.898 | 0.583 | 1.853 |
| AIM2    | -0.287 | 0.297 | -0.964 | 0.335 | 0.751 | 0.223 | -1.117 | 0.264 | 0.419 | 1.345 |
| AIFM1   | 0.142  | 0.296 | 0.479  | 0.632 | 1.152 | 0.34  | 0.447  | 0.655 | 0.646 | 2.056 |
| AIF1    | -0.44  | 0.302 | -1.454 | 0.146 | 0.644 | 0.195 | -1.826 | 0.068 | 0.356 | 1.165 |
| AIDA    | -0.492 | 0.302 | -1.626 | 0.104 | 0.612 | 0.185 | -2.101 | 0.036 | 0.338 | 1.106 |
| AICDA   | -0.049 | 0.295 | -0.165 | 0.869 | 0.952 | 0.281 | -0.169 | 0.865 | 0.534 | 1.699 |
| AHSP    | 0.43   | 0.3   | 1.434  | 0.151 | 1.538 | 0.461 | 1.166  | 0.244 | 0.854 | 2.768 |
| AHSG    | -0.661 | 0.306 | -2.161 | 0.031 | 0.516 | 0.158 | -3.064 | 0.002 | 0.283 | 0.94  |
| AHSA1   | 0.579  | 0.306 | 1.894  | 0.058 | 1.784 | 0.545 | 1.438  | 0.15  | 0.98  | 3.247 |
| AHR     | -0.486 | 0.3   | -1.619 | 0.105 | 0.615 | 0.185 | -2.085 | 0.037 | 0.341 | 1.108 |
| AHNAK2  | -0.623 | 0.306 | -2.039 | 0.041 | 0.536 | 0.164 | -2.83  | 0.005 | 0.295 | 0.976 |
| AHNAK   | -0.374 | 0.3   | -1.248 | 0.212 | 0.688 | 0.206 | -1.514 | 0.13  | 0.382 | 1.238 |
| AHI1    | -0.164 | 0.296 | -0.555 | 0.579 | 0.848 | 0.251 | -0.604 | 0.546 | 0.475 | 1.515 |
| AHDC1   | -0.481 | 0.306 | -1.573 | 0.116 | 0.618 | 0.189 | -2.02  | 0.043 | 0.339 | 1.126 |
| AHCYL2  | -0.543 | 0.306 | -1.777 | 0.076 | 0.581 | 0.178 | -2.361 | 0.018 | 0.319 | 1.057 |
| AHCYL1  | 0.191  | 0.296 | 0.645  | 0.519 | 1.211 | 0.359 | 0.587  | 0.557 | 0.677 | 2.164 |
| AHCY    | -0.278 | 0.297 | -0.937 | 0.349 | 0.757 | 0.225 | -1.08  | 0.28  | 0.423 | 1.355 |
| AHCTF1  | 0.645  | 0.306 | 2.11   | 0.035 | 1.906 | 0.582 | 1.555  | 0.12  | 1.047 | 3.469 |
| AGXT    | -0.478 | 0.302 | -1.584 | 0.113 | 0.62  | 0.187 | -2.031 | 0.042 | 0.343 | 1.12  |
| AGTR2   | 0.33   | 0.3   | 1.1    | 0.271 | 1.391 | 0.417 | 0.937  | 0.349 | 0.773 | 2.502 |
| AGTR1   | -0.282 | 0.3   | -0.939 | 0.348 | 0.754 | 0.227 | -1.085 | 0.278 | 0.419 | 1.359 |
| AGTPBP1 | 0.768  | 0.31  | 2.478  | 0.013 | 2.155 | 0.668 | 1.73   | 0.084 | 1.174 | 3.956 |
| AGT     | -0.029 | 0.295 | -0.099 | 0.921 | 0.971 | 0.287 | -0.101 | 0.92  | 0.544 | 1.733 |
| AGRP    | -0.364 | 0.299 | -1.218 | 0.223 | 0.695 | 0.208 | -1.47  | 0.142 | 0.387 | 1.248 |
| AGRN    | -0.114 | 0.295 | -0.385 | 0.7   | 0.893 | 0.264 | -0.408 | 0.683 | 0.5   | 1.592 |
| AGR2    | 0.287  | 0.297 | 0.968  | 0.333 | 1.333 | 0.395 | 0.841  | 0.4   | 0.745 | 2.384 |
| AGPS    | 0.046  | 0.295 | 0.156  | 0.876 | 1.047 | 0.309 | 0.153  | 0.879 | 0.587 | 1.867 |
| AGPAT5  | -0.133 | 0.295 | -0.449 | 0.653 | 0.876 | 0.259 | -0.481 | 0.631 | 0.491 | 1.562 |
| AGPAT4  | 0.22   | 0.296 | 0.744  | 0.457 | 1.247 | 0.369 | 0.668  | 0.504 | 0.697 | 2.228 |

|         |        |       |        |       |       |       |        |       |       |       |
|---------|--------|-------|--------|-------|-------|-------|--------|-------|-------|-------|
| AGPAT3  | 0.184  | 0.295 | 0.624  | 0.533 | 1.202 | 0.355 | 0.57   | 0.569 | 0.674 | 2.146 |
| AGPAT2  | 0.035  | 0.298 | 0.119  | 0.905 | 1.036 | 0.308 | 0.117  | 0.907 | 0.578 | 1.857 |
| AGPAT1  | 0.304  | 0.3   | 1.012  | 0.312 | 1.355 | 0.407 | 0.873  | 0.383 | 0.752 | 2.441 |
| AGO4    | 0.264  | 0.297 | 0.888  | 0.374 | 1.302 | 0.387 | 0.781  | 0.435 | 0.727 | 2.331 |
| AGO3    | 1.003  | 0.321 | 3.119  | 0.002 | 2.726 | 0.876 | 1.969  | 0.049 | 1.452 | 5.118 |
| AGO1    | -0.124 | 0.296 | -0.418 | 0.676 | 0.884 | 0.261 | -0.445 | 0.656 | 0.495 | 1.577 |
| AGMAT   | -0.195 | 0.298 | -0.655 | 0.512 | 0.823 | 0.245 | -0.723 | 0.469 | 0.459 | 1.475 |
| AGL     | -0.125 | 0.296 | -0.424 | 0.671 | 0.882 | 0.261 | -0.452 | 0.651 | 0.494 | 1.574 |
| AGK     | 0.379  | 0.297 | 1.277  | 0.202 | 1.461 | 0.434 | 1.063  | 0.288 | 0.816 | 2.615 |
| AGGF1   | -0.4   | 0.303 | -1.324 | 0.186 | 0.67  | 0.203 | -1.628 | 0.104 | 0.37  | 1.212 |
| AGFG2   | -0.024 | 0.296 | -0.081 | 0.935 | 0.976 | 0.289 | -0.082 | 0.934 | 0.547 | 1.744 |
| AGFG1   | -0.11  | 0.296 | -0.371 | 0.71  | 0.896 | 0.265 | -0.393 | 0.695 | 0.502 | 1.6   |
| AGER    | 0.542  | 0.302 | 1.793  | 0.073 | 1.72  | 0.52  | 1.384  | 0.166 | 0.951 | 3.11  |
| AGBL5   | 0.143  | 0.295 | 0.485  | 0.627 | 1.154 | 0.341 | 0.452  | 0.651 | 0.647 | 2.059 |
| AGBL3   | 0.175  | 0.296 | 0.59   | 0.555 | 1.191 | 0.353 | 0.541  | 0.588 | 0.666 | 2.128 |
| AGBL2   | 0.288  | 0.298 | 0.965  | 0.334 | 1.333 | 0.397 | 0.839  | 0.402 | 0.743 | 2.391 |
| AGAP2   | 0.509  | 0.302 | 1.685  | 0.092 | 1.664 | 0.503 | 1.32   | 0.187 | 0.92  | 3.009 |
| AGAP1   | -0.387 | 0.3   | -1.292 | 0.197 | 0.679 | 0.203 | -1.577 | 0.115 | 0.378 | 1.222 |
| AGA     | -0.327 | 0.3   | -1.091 | 0.275 | 0.721 | 0.216 | -1.291 | 0.197 | 0.401 | 1.297 |
| AFTPH   | 0.017  | 0.295 | 0.059  | 0.953 | 1.018 | 0.3   | 0.059  | 0.953 | 0.571 | 1.814 |
| AFP     | 0.004  | 0.296 | 0.012  | 0.99  | 1.004 | 0.297 | 0.012  | 0.99  | 0.562 | 1.792 |
| AFM     | 0.012  | 0.296 | 0.04   | 0.968 | 1.012 | 0.299 | 0.039  | 0.969 | 0.567 | 1.807 |
| AFG3L2  | -0.158 | 0.297 | -0.531 | 0.595 | 0.854 | 0.254 | -0.576 | 0.565 | 0.477 | 1.528 |
| AFF4    | 0.439  | 0.3   | 1.464  | 0.143 | 1.551 | 0.465 | 1.185  | 0.236 | 0.862 | 2.789 |
| AFF3    | -0.394 | 0.307 | -1.284 | 0.199 | 0.674 | 0.207 | -1.574 | 0.116 | 0.369 | 1.231 |
| AFF2    | -0.162 | 0.296 | -0.548 | 0.584 | 0.85  | 0.252 | -0.595 | 0.552 | 0.476 | 1.519 |
| AFF1    | -0.103 | 0.295 | -0.349 | 0.727 | 0.902 | 0.266 | -0.368 | 0.713 | 0.506 | 1.609 |
| AFDN-DT | -0.378 | 0.298 | -1.27  | 0.204 | 0.685 | 0.204 | -1.543 | 0.123 | 0.382 | 1.228 |
| AFDN    | 0.332  | 0.299 | 1.112  | 0.266 | 1.394 | 0.416 | 0.946  | 0.344 | 0.776 | 2.503 |
| AFAP1   | 0.336  | 0.299 | 1.125  | 0.261 | 1.399 | 0.418 | 0.955  | 0.339 | 0.779 | 2.512 |
| AEN     | -0.262 | 0.3   | -0.873 | 0.382 | 0.77  | 0.231 | -0.998 | 0.318 | 0.428 | 1.385 |
| AEBP1   | -0.764 | 0.31  | -2.467 | 0.014 | 0.466 | 0.144 | -3.703 | 0     | 0.254 | 0.855 |
| ADTRP   | -0.121 | 0.295 | -0.411 | 0.681 | 0.886 | 0.262 | -0.437 | 0.662 | 0.496 | 1.58  |
| ADSS2   | -0.068 | 0.295 | -0.229 | 0.819 | 0.935 | 0.276 | -0.236 | 0.813 | 0.524 | 1.668 |
| ADSL    | 0.579  | 0.306 | 1.893  | 0.058 | 1.784 | 0.546 | 1.437  | 0.151 | 0.98  | 3.249 |
| ADRM1   | 0.543  | 0.302 | 1.796  | 0.072 | 1.721 | 0.52  | 1.386  | 0.166 | 0.952 | 3.112 |
| ADRB3   | 0.587  | 0.311 | 1.888  | 0.059 | 1.798 | 0.559 | 1.428  | 0.153 | 0.978 | 3.306 |
| ADRB2   | -0.801 | 0.31  | -2.582 | 0.01  | 0.449 | 0.139 | -3.957 | 0     | 0.245 | 0.825 |

|         |        |       |        |       |       |       |        |       |       |       |
|---------|--------|-------|--------|-------|-------|-------|--------|-------|-------|-------|
| ADRB1   | 0.455  | 0.3   | 1.518  | 0.129 | 1.576 | 0.473 | 1.22   | 0.223 | 0.876 | 2.837 |
| ADRA2C  | -0.32  | 0.298 | -1.077 | 0.282 | 0.726 | 0.216 | -1.269 | 0.204 | 0.405 | 1.301 |
| ADRA2B  | -0.208 | 0.297 | -0.7   | 0.484 | 0.812 | 0.241 | -0.778 | 0.436 | 0.454 | 1.453 |
| ADRA2A  | -1.129 | 0.336 | -3.359 | 0.001 | 0.323 | 0.109 | -6.225 | 0     | 0.167 | 0.625 |
| ADRA1D  | -0.362 | 0.298 | -1.217 | 0.224 | 0.696 | 0.207 | -1.466 | 0.143 | 0.388 | 1.248 |
| ADRA1B  | 0.027  | 0.296 | 0.092  | 0.927 | 1.028 | 0.304 | 0.091  | 0.928 | 0.576 | 1.834 |
| ADRA1A  | -0.039 | 0.295 | -0.133 | 0.894 | 0.961 | 0.284 | -0.136 | 0.892 | 0.539 | 1.715 |
| ADPRM   | -0.229 | 0.298 | -0.77  | 0.441 | 0.795 | 0.237 | -0.865 | 0.387 | 0.443 | 1.426 |
| ADPRH   | -0.452 | 0.3   | -1.507 | 0.132 | 0.636 | 0.191 | -1.906 | 0.057 | 0.353 | 1.146 |
| ADPGK   | -0.289 | 0.298 | -0.971 | 0.332 | 0.749 | 0.223 | -1.125 | 0.26  | 0.418 | 1.342 |
| ADORA3  | -0.332 | 0.3   | -1.107 | 0.268 | 0.718 | 0.215 | -1.313 | 0.189 | 0.399 | 1.291 |
| ADORA2B | 0.247  | 0.296 | 0.832  | 0.405 | 1.28  | 0.379 | 0.737  | 0.461 | 0.716 | 2.287 |
| ADORA1  | 0.053  | 0.296 | 0.18   | 0.858 | 1.054 | 0.312 | 0.175  | 0.861 | 0.591 | 1.882 |
| ADO     | 0.104  | 0.297 | 0.35   | 0.726 | 1.11  | 0.33  | 0.333  | 0.739 | 0.62  | 1.986 |
| ADNP2   | -0.3   | 0.3   | -0.999 | 0.318 | 0.741 | 0.222 | -1.165 | 0.244 | 0.412 | 1.334 |
| ADNP    | 0.165  | 0.296 | 0.557  | 0.578 | 1.179 | 0.349 | 0.513  | 0.608 | 0.66  | 2.108 |
| ADM2    | 0.145  | 0.295 | 0.491  | 0.624 | 1.156 | 0.341 | 0.457  | 0.648 | 0.648 | 2.062 |
| ADM     | 0.958  | 0.321 | 2.987  | 0.003 | 2.606 | 0.836 | 1.922  | 0.055 | 1.39  | 4.886 |
| ADK     | 0.392  | 0.298 | 1.316  | 0.188 | 1.479 | 0.44  | 1.089  | 0.276 | 0.826 | 2.651 |
| ADIRF   | -0.077 | 0.296 | -0.262 | 0.793 | 0.926 | 0.274 | -0.272 | 0.785 | 0.519 | 1.652 |
| ADIPOR2 | -0.213 | 0.298 | -0.714 | 0.475 | 0.808 | 0.241 | -0.796 | 0.426 | 0.451 | 1.449 |
| ADIPOR1 | -0.098 | 0.296 | -0.331 | 0.741 | 0.907 | 0.268 | -0.348 | 0.728 | 0.508 | 1.619 |
| ADIPOQ  | -0.227 | 0.296 | -0.767 | 0.443 | 0.797 | 0.236 | -0.861 | 0.389 | 0.446 | 1.424 |
| ADI1    | 0.223  | 0.298 | 0.748  | 0.454 | 1.249 | 0.372 | 0.671  | 0.503 | 0.697 | 2.239 |
| ADH7    | 0.342  | 0.298 | 1.149  | 0.251 | 1.407 | 0.419 | 0.973  | 0.331 | 0.786 | 2.522 |
| ADH6    | 0.206  | 0.296 | 0.696  | 0.486 | 1.229 | 0.364 | 0.629  | 0.529 | 0.688 | 2.196 |
| ADH5    | 0.957  | 0.321 | 2.984  | 0.003 | 2.605 | 0.836 | 1.92   | 0.055 | 1.389 | 4.886 |
| ADH1C   | 0.043  | 0.295 | 0.144  | 0.885 | 1.043 | 0.308 | 0.141  | 0.888 | 0.585 | 1.861 |
| ADH1B   | -0.159 | 0.295 | -0.537 | 0.591 | 0.853 | 0.252 | -0.582 | 0.561 | 0.478 | 1.523 |
| ADH1A   | 0.198  | 0.296 | 0.667  | 0.505 | 1.219 | 0.361 | 0.606  | 0.545 | 0.682 | 2.179 |
| ADGRV1  | 0.053  | 0.295 | 0.18   | 0.857 | 1.055 | 0.312 | 0.175  | 0.861 | 0.591 | 1.882 |
| ADGRL4  | -0.214 | 0.296 | -0.723 | 0.47  | 0.807 | 0.239 | -0.806 | 0.42  | 0.452 | 1.443 |
| ADGRL3  | 0.29   | 0.296 | 0.978  | 0.328 | 1.336 | 0.396 | 0.849  | 0.396 | 0.748 | 2.387 |
| ADGRL2  | -0.407 | 0.298 | -1.368 | 0.171 | 0.665 | 0.198 | -1.689 | 0.091 | 0.371 | 1.193 |
| ADGRL1  | 0.397  | 0.3   | 1.324  | 0.185 | 1.487 | 0.446 | 1.093  | 0.274 | 0.827 | 2.677 |
| ADGRG6  | -0.191 | 0.298 | -0.64  | 0.522 | 0.826 | 0.246 | -0.705 | 0.481 | 0.461 | 1.481 |
| ADGRG3  | -0.196 | 0.297 | -0.662 | 0.508 | 0.822 | 0.244 | -0.732 | 0.464 | 0.459 | 1.469 |
| ADGRG2  | 0.364  | 0.303 | 1.202  | 0.229 | 1.439 | 0.435 | 1.008  | 0.314 | 0.795 | 2.603 |



|           |        |       |        |       |       |       |        |       |       |       |
|-----------|--------|-------|--------|-------|-------|-------|--------|-------|-------|-------|
| ADGRG1    | 0.511  | 0.302 | 1.691  | 0.091 | 1.667 | 0.504 | 1.324  | 0.185 | 0.922 | 3.014 |
| ADGRF5    | -0.314 | 0.297 | -1.056 | 0.291 | 0.731 | 0.217 | -1.24  | 0.215 | 0.408 | 1.308 |
| ADGRF1    | 0.648  | 0.306 | 2.118  | 0.034 | 1.912 | 0.585 | 1.559  | 0.119 | 1.05  | 3.483 |
| ADGRE5    | 0.721  | 0.31  | 2.327  | 0.02  | 2.056 | 0.637 | 1.658  | 0.097 | 1.12  | 3.773 |
| ADGRE3    | 0.03   | 0.295 | 0.1    | 0.92  | 1.03  | 0.304 | 0.099  | 0.921 | 0.577 | 1.837 |
| ADGRE2    | -0.278 | 0.298 | -0.935 | 0.35  | 0.757 | 0.225 | -1.078 | 0.281 | 0.422 | 1.357 |
| ADGRE1    | -0.205 | 0.296 | -0.692 | 0.489 | 0.814 | 0.241 | -0.769 | 0.442 | 0.456 | 1.456 |
| ADGRD2    | -0.022 | 0.295 | -0.076 | 0.94  | 0.978 | 0.289 | -0.076 | 0.939 | 0.548 | 1.744 |
| ADGRB3    | 0.455  | 0.3   | 1.519  | 0.129 | 1.577 | 0.473 | 1.22   | 0.222 | 0.876 | 2.838 |
| ADGRB2    | -0.064 | 0.296 | -0.218 | 0.828 | 0.938 | 0.278 | -0.225 | 0.822 | 0.525 | 1.675 |
| ADGRB1    | 0.369  | 0.297 | 1.242  | 0.214 | 1.447 | 0.43  | 1.039  | 0.299 | 0.808 | 2.592 |
| ADGRA3    | 0.83   | 0.315 | 2.637  | 0.008 | 2.293 | 0.722 | 1.792  | 0.073 | 1.238 | 4.249 |
| ADGRA2    | -1.166 | 0.329 | -3.548 | 0     | 0.312 | 0.102 | -6.721 | 0     | 0.164 | 0.593 |
| ADGB      | 0.089  | 0.295 | 0.302  | 0.763 | 1.093 | 0.323 | 0.289  | 0.773 | 0.613 | 1.951 |
| ADD3-AS1  | 0.532  | 0.302 | 1.758  | 0.079 | 1.702 | 0.515 | 1.364  | 0.173 | 0.941 | 3.079 |
| ADD3      | -0.199 | 0.295 | -0.674 | 0.501 | 0.82  | 0.242 | -0.745 | 0.456 | 0.459 | 1.462 |
| ADD2      | -0.369 | 0.299 | -1.238 | 0.216 | 0.691 | 0.206 | -1.497 | 0.134 | 0.385 | 1.241 |
| ADD1      | -0.467 | 0.302 | -1.545 | 0.122 | 0.627 | 0.189 | -1.969 | 0.049 | 0.347 | 1.134 |
| ADCYAP1R1 | 0.005  | 0.295 | 0.016  | 0.987 | 1.005 | 0.296 | 0.016  | 0.987 | 0.563 | 1.791 |
| ADCYAP1   | 0.262  | 0.299 | 0.878  | 0.38  | 1.3   | 0.388 | 0.772  | 0.44  | 0.724 | 2.334 |
| ADCY9     | -0.01  | 0.296 | -0.034 | 0.973 | 0.99  | 0.293 | -0.034 | 0.973 | 0.554 | 1.768 |
| ADCY8     | 0.296  | 0.296 | 0.999  | 0.318 | 1.344 | 0.398 | 0.864  | 0.387 | 0.752 | 2.403 |
| ADCY7     | 0.151  | 0.296 | 0.51   | 0.61  | 1.163 | 0.345 | 0.474  | 0.636 | 0.651 | 2.08  |
| ADCY6     | -0.503 | 0.302 | -1.664 | 0.096 | 0.605 | 0.183 | -2.162 | 0.031 | 0.335 | 1.094 |
| ADCY3     | -0.732 | 0.311 | -2.358 | 0.018 | 0.481 | 0.149 | -3.477 | 0.001 | 0.262 | 0.884 |
| ADCY2     | 0.079  | 0.295 | 0.268  | 0.789 | 1.082 | 0.32  | 0.258  | 0.797 | 0.607 | 1.931 |
| ADCY10    | -0.012 | 0.295 | -0.04  | 0.968 | 0.988 | 0.292 | -0.04  | 0.968 | 0.554 | 1.763 |
| ADCY1     | 0.34   | 0.298 | 1.143  | 0.253 | 1.405 | 0.418 | 0.969  | 0.333 | 0.784 | 2.517 |
| ADCK2     | 0.553  | 0.3   | 1.839  | 0.066 | 1.738 | 0.522 | 1.413  | 0.158 | 0.964 | 3.131 |
| ADAT1     | -0.16  | 0.297 | -0.54  | 0.589 | 0.852 | 0.253 | -0.586 | 0.558 | 0.476 | 1.524 |
| ADARB2    | -0.474 | 0.3   | -1.579 | 0.114 | 0.623 | 0.187 | -2.02  | 0.043 | 0.346 | 1.121 |
| ADARB1    | -0.33  | 0.298 | -1.109 | 0.268 | 0.719 | 0.214 | -1.313 | 0.189 | 0.401 | 1.288 |
| ADAR      | -0.034 | 0.296 | -0.115 | 0.908 | 0.966 | 0.286 | -0.117 | 0.907 | 0.541 | 1.726 |
| ADAP2     | 0.418  | 0.3   | 1.397  | 0.163 | 1.519 | 0.455 | 1.141  | 0.254 | 0.845 | 2.733 |
| ADAP1     | 0.033  | 0.295 | 0.113  | 0.91  | 1.034 | 0.305 | 0.111  | 0.912 | 0.58  | 1.844 |
| ADAMTSL4  | -0.081 | 0.295 | -0.274 | 0.784 | 0.922 | 0.272 | -0.286 | 0.775 | 0.517 | 1.645 |
| ADAMTSL3  | -0.177 | 0.296 | -0.597 | 0.55  | 0.838 | 0.248 | -0.653 | 0.513 | 0.469 | 1.497 |
| ADAMTSL2  | 0.472  | 0.301 | 1.566  | 0.117 | 1.603 | 0.483 | 1.249  | 0.212 | 0.888 | 2.892 |

|            |        |       |        |       |       |       |        |       |       |       |
|------------|--------|-------|--------|-------|-------|-------|--------|-------|-------|-------|
| ADAMTS9    | -0.5   | 0.302 | -1.658 | 0.097 | 0.606 | 0.183 | -2.152 | 0.031 | 0.336 | 1.095 |
| ADAMTS8    | 0.113  | 0.295 | 0.381  | 0.703 | 1.119 | 0.33  | 0.36   | 0.719 | 0.627 | 1.996 |
| ADAMTS7    | 0.428  | 0.3   | 1.43   | 0.153 | 1.535 | 0.46  | 1.163  | 0.245 | 0.853 | 2.761 |
| ADAMTS6    | 0.211  | 0.298 | 0.707  | 0.48  | 1.235 | 0.368 | 0.637  | 0.524 | 0.688 | 2.215 |
| ADAMTS5    | -0.116 | 0.296 | -0.391 | 0.696 | 0.891 | 0.264 | -0.414 | 0.679 | 0.498 | 1.592 |
| ADAMTS3    | -0.381 | 0.3   | -1.273 | 0.203 | 0.683 | 0.205 | -1.55  | 0.121 | 0.38  | 1.228 |
| ADAMTS20   | 0.313  | 0.298 | 1.053  | 0.292 | 1.368 | 0.407 | 0.904  | 0.366 | 0.764 | 2.451 |
| ADAMTS2    | -0.305 | 0.296 | -1.029 | 0.304 | 0.737 | 0.218 | -1.203 | 0.229 | 0.412 | 1.318 |
| ADAMTS13   | 0.021  | 0.296 | 0.072  | 0.943 | 1.021 | 0.303 | 0.071  | 0.943 | 0.572 | 1.825 |
| ADAMTS12   | 0.021  | 0.296 | 0.07   | 0.945 | 1.021 | 0.302 | 0.069  | 0.945 | 0.572 | 1.823 |
| ADAMTS1    | 0.429  | 0.3   | 1.43   | 0.153 | 1.535 | 0.46  | 1.163  | 0.245 | 0.853 | 2.763 |
| ADAMDEC1   | 0.043  | 0.295 | 0.147  | 0.883 | 1.044 | 0.308 | 0.144  | 0.886 | 0.586 | 1.862 |
| ADAM9      | -0.014 | 0.295 | -0.046 | 0.963 | 0.987 | 0.291 | -0.046 | 0.963 | 0.553 | 1.76  |
| ADAM8      | 0.44   | 0.299 | 1.474  | 0.141 | 1.553 | 0.464 | 1.192  | 0.233 | 0.865 | 2.791 |
| ADAM7      | 0.248  | 0.296 | 0.836  | 0.403 | 1.281 | 0.38  | 0.74   | 0.459 | 0.717 | 2.29  |
| ADAM5      | -0.412 | 0.299 | -1.377 | 0.169 | 0.662 | 0.198 | -1.703 | 0.088 | 0.369 | 1.191 |
| ADAM3A     | 0.251  | 0.298 | 0.843  | 0.399 | 1.285 | 0.383 | 0.746  | 0.456 | 0.717 | 2.304 |
| ADAM30     | -0.105 | 0.296 | -0.354 | 0.724 | 0.901 | 0.266 | -0.373 | 0.709 | 0.505 | 1.608 |
| ADAM28     | -0.672 | 0.31  | -2.169 | 0.03  | 0.511 | 0.158 | -3.092 | 0.002 | 0.278 | 0.937 |
| ADAM23     | -0.034 | 0.295 | -0.116 | 0.908 | 0.966 | 0.285 | -0.118 | 0.906 | 0.542 | 1.724 |
| ADAM22     | 0.126  | 0.296 | 0.426  | 0.67  | 1.135 | 0.336 | 0.4    | 0.689 | 0.635 | 2.029 |
| ADAM21     | 0.001  | 0.296 | 0.002  | 0.998 | 1.001 | 0.296 | 0.002  | 0.998 | 0.56  | 1.788 |
| ADAM20     | -0.512 | 0.3   | -1.706 | 0.088 | 0.599 | 0.18  | -2.228 | 0.026 | 0.333 | 1.079 |
| ADAM2      | 0.628  | 0.303 | 2.072  | 0.038 | 1.874 | 0.568 | 1.538  | 0.124 | 1.034 | 3.394 |
| ADAM19     | -0.467 | 0.3   | -1.555 | 0.12  | 0.627 | 0.188 | -1.982 | 0.047 | 0.348 | 1.129 |
| ADAM18     | 0.168  | 0.296 | 0.569  | 0.57  | 1.183 | 0.35  | 0.523  | 0.601 | 0.662 | 2.114 |
| ADAM17     | -0.553 | 0.3   | -1.841 | 0.066 | 0.575 | 0.173 | -2.459 | 0.014 | 0.319 | 1.036 |
| ADAM15     | -0.502 | 0.306 | -1.639 | 0.101 | 0.605 | 0.185 | -2.128 | 0.033 | 0.332 | 1.103 |
| ADAM12     | -0.714 | 0.306 | -2.335 | 0.02  | 0.489 | 0.15  | -3.409 | 0.001 | 0.269 | 0.892 |
| ADAM11     | 0.142  | 0.296 | 0.478  | 0.633 | 1.152 | 0.341 | 0.445  | 0.656 | 0.644 | 2.059 |
| ADAM10     | 0.005  | 0.295 | 0.017  | 0.986 | 1.005 | 0.297 | 0.017  | 0.986 | 0.564 | 1.792 |
| ADA2       | -0.611 | 0.303 | -2.014 | 0.044 | 0.543 | 0.165 | -2.775 | 0.006 | 0.3   | 0.984 |
| ADA        | 0.268  | 0.298 | 0.901  | 0.368 | 1.308 | 0.389 | 0.79   | 0.43  | 0.729 | 2.344 |
| ACYP2      | -0.45  | 0.302 | -1.486 | 0.137 | 0.638 | 0.193 | -1.877 | 0.061 | 0.353 | 1.154 |
| ACYP1      | 0.278  | 0.296 | 0.938  | 0.348 | 1.32  | 0.391 | 0.819  | 0.413 | 0.739 | 2.358 |
| ACVRL1     | -0.483 | 0.3   | -1.612 | 0.107 | 0.617 | 0.185 | -2.072 | 0.038 | 0.343 | 1.11  |
| ACVR2B-AS1 | -0.42  | 0.298 | -1.41  | 0.159 | 0.657 | 0.196 | -1.753 | 0.08  | 0.366 | 1.178 |
| ACVR2B     | 0.639  | 0.31  | 2.064  | 0.039 | 1.895 | 0.587 | 1.525  | 0.127 | 1.033 | 3.477 |

|        |        |       |        |       |       |       |        |       |       |       |
|--------|--------|-------|--------|-------|-------|-------|--------|-------|-------|-------|
| ACVR2A | -0.159 | 0.296 | -0.537 | 0.591 | 0.853 | 0.252 | -0.582 | 0.561 | 0.478 | 1.524 |
| ACVR1B | -0.4   | 0.3   | -1.336 | 0.181 | 0.67  | 0.201 | -1.644 | 0.1   | 0.372 | 1.205 |
| ACVR1  | -0.523 | 0.301 | -1.737 | 0.082 | 0.593 | 0.178 | -2.282 | 0.023 | 0.329 | 1.069 |
| ACTR8  | 0.122  | 0.297 | 0.41   | 0.682 | 1.129 | 0.335 | 0.386  | 0.699 | 0.631 | 2.02  |
| ACTR6  | 0.082  | 0.296 | 0.279  | 0.781 | 1.086 | 0.321 | 0.267  | 0.789 | 0.608 | 1.938 |
| ACTR5  | 0.394  | 0.3   | 1.316  | 0.188 | 1.484 | 0.445 | 1.088  | 0.277 | 0.825 | 2.669 |
| ACTR3B | 0.455  | 0.303 | 1.503  | 0.133 | 1.575 | 0.477 | 1.208  | 0.227 | 0.871 | 2.85  |
| ACTR3  | 0.065  | 0.298 | 0.218  | 0.828 | 1.067 | 0.318 | 0.211  | 0.833 | 0.595 | 1.913 |
| ACTR2  | -0.092 | 0.295 | -0.31  | 0.757 | 0.913 | 0.269 | -0.325 | 0.746 | 0.512 | 1.628 |
| ACTR1B | -0.652 | 0.306 | -2.133 | 0.033 | 0.521 | 0.159 | -3.008 | 0.003 | 0.286 | 0.948 |
| ACTR1A | 0.088  | 0.295 | 0.297  | 0.767 | 1.091 | 0.322 | 0.284  | 0.776 | 0.612 | 1.946 |
| ACTR10 | -0.033 | 0.297 | -0.111 | 0.912 | 0.968 | 0.288 | -0.113 | 0.91  | 0.54  | 1.733 |
| ACTN4  | -0.128 | 0.295 | -0.432 | 0.666 | 0.88  | 0.26  | -0.46  | 0.645 | 0.493 | 1.571 |
| ACTN3  | 0.342  | 0.3   | 1.139  | 0.255 | 1.407 | 0.422 | 0.965  | 0.335 | 0.782 | 2.535 |
| ACTN2  | 0.287  | 0.298 | 0.963  | 0.335 | 1.332 | 0.396 | 0.838  | 0.402 | 0.743 | 2.387 |
| ACTN1  | 0.005  | 0.295 | 0.017  | 0.986 | 1.005 | 0.297 | 0.017  | 0.986 | 0.563 | 1.793 |
| ACTL8  | 0.035  | 0.296 | 0.119  | 0.905 | 1.036 | 0.306 | 0.117  | 0.907 | 0.58  | 1.849 |
| ACTL7B | 0.352  | 0.3   | 1.173  | 0.241 | 1.422 | 0.426 | 0.989  | 0.323 | 0.79  | 2.559 |
| ACTL7A | 0.009  | 0.297 | 0.032  | 0.975 | 1.009 | 0.299 | 0.032  | 0.975 | 0.565 | 1.805 |
| ACTL6B | 0.607  | 0.304 | 1.997  | 0.046 | 1.835 | 0.558 | 1.497  | 0.134 | 1.011 | 3.329 |
| ACTL6A | 1.021  | 0.328 | 3.114  | 0.002 | 2.775 | 0.91  | 1.952  | 0.051 | 1.46  | 5.275 |
| ACTG2  | -0.506 | 0.302 | -1.676 | 0.094 | 0.603 | 0.182 | -2.182 | 0.029 | 0.333 | 1.09  |
| ACTC1  | -0.224 | 0.296 | -0.756 | 0.45  | 0.8   | 0.237 | -0.847 | 0.397 | 0.447 | 1.429 |
| ACTB   | 0.012  | 0.296 | 0.041  | 0.967 | 1.012 | 0.299 | 0.041  | 0.968 | 0.567 | 1.807 |
| ACTA2  | -0.481 | 0.3   | -1.602 | 0.109 | 0.618 | 0.185 | -2.057 | 0.04  | 0.344 | 1.113 |
| ACTA1  | 0.292  | 0.298 | 0.982  | 0.326 | 1.34  | 0.399 | 0.852  | 0.394 | 0.748 | 2.4   |
| ACSS3  | -0.103 | 0.295 | -0.348 | 0.728 | 0.902 | 0.266 | -0.366 | 0.714 | 0.506 | 1.61  |
| ACSM5  | -0.064 | 0.295 | -0.216 | 0.829 | 0.938 | 0.277 | -0.223 | 0.823 | 0.526 | 1.673 |
| ACSM3  | 0.22   | 0.296 | 0.742  | 0.458 | 1.246 | 0.369 | 0.666  | 0.505 | 0.697 | 2.227 |
| ACSM1  | -0.042 | 0.296 | -0.143 | 0.886 | 0.958 | 0.284 | -0.146 | 0.884 | 0.536 | 1.713 |
| ACSL6  | -0.128 | 0.296 | -0.431 | 0.667 | 0.88  | 0.261 | -0.459 | 0.646 | 0.493 | 1.573 |
| ACSL5  | -0.397 | 0.298 | -1.331 | 0.183 | 0.673 | 0.2   | -1.634 | 0.102 | 0.375 | 1.206 |
| ACSL4  | -0.07  | 0.295 | -0.238 | 0.812 | 0.932 | 0.275 | -0.246 | 0.805 | 0.523 | 1.663 |
| ACSL3  | 0.04   | 0.296 | 0.134  | 0.893 | 1.041 | 0.308 | 0.132  | 0.895 | 0.583 | 1.857 |
| ACSL1  | 0.245  | 0.298 | 0.822  | 0.411 | 1.277 | 0.38  | 0.729  | 0.466 | 0.713 | 2.289 |
| ACSF2  | -0.281 | 0.298 | -0.944 | 0.345 | 0.755 | 0.225 | -1.089 | 0.276 | 0.421 | 1.353 |
| ACSBG2 | -0.451 | 0.3   | -1.503 | 0.133 | 0.637 | 0.191 | -1.899 | 0.058 | 0.354 | 1.147 |
| ACSBG1 | -0.09  | 0.296 | -0.305 | 0.76  | 0.914 | 0.27  | -0.319 | 0.75  | 0.512 | 1.631 |

|        |        |       |        |       |       |       |        |       |       |       |
|--------|--------|-------|--------|-------|-------|-------|--------|-------|-------|-------|
| ACRV1  | -0.14  | 0.296 | -0.472 | 0.637 | 0.87  | 0.257 | -0.506 | 0.613 | 0.487 | 1.553 |
| ACR    | -0.333 | 0.298 | -1.121 | 0.262 | 0.716 | 0.213 | -1.33  | 0.183 | 0.4   | 1.284 |
| ACP6   | 0.337  | 0.297 | 1.133  | 0.257 | 1.4   | 0.416 | 0.962  | 0.336 | 0.782 | 2.508 |
| ACP5   | 0.062  | 0.295 | 0.211  | 0.833 | 1.064 | 0.314 | 0.204  | 0.838 | 0.596 | 1.899 |
| ACP3   | -0.122 | 0.296 | -0.414 | 0.679 | 0.885 | 0.262 | -0.44  | 0.66  | 0.496 | 1.579 |
| ACP2   | 0.303  | 0.298 | 1.016  | 0.31  | 1.354 | 0.404 | 0.877  | 0.381 | 0.755 | 2.43  |
| ACP1   | -0.343 | 0.298 | -1.152 | 0.249 | 0.71  | 0.211 | -1.374 | 0.17  | 0.396 | 1.272 |
| ACOXL  | -0.042 | 0.296 | -0.142 | 0.887 | 0.959 | 0.283 | -0.145 | 0.884 | 0.537 | 1.711 |
| ACOX3  | -0.42  | 0.3   | -1.401 | 0.161 | 0.657 | 0.197 | -1.741 | 0.082 | 0.365 | 1.183 |
| ACOX2  | 0.379  | 0.299 | 1.268  | 0.205 | 1.461 | 0.437 | 1.055  | 0.291 | 0.813 | 2.626 |
| ACOX1  | 0.72   | 0.31  | 2.325  | 0.02  | 2.055 | 0.637 | 1.657  | 0.097 | 1.12  | 3.772 |
| ACOT9  | 0.334  | 0.3   | 1.114  | 0.265 | 1.396 | 0.418 | 0.947  | 0.343 | 0.776 | 2.513 |
| ACOT8  | 0.641  | 0.307 | 2.092  | 0.036 | 1.899 | 0.582 | 1.544  | 0.123 | 1.041 | 3.464 |
| ACOT7  | 0.284  | 0.296 | 0.962  | 0.336 | 1.329 | 0.393 | 0.838  | 0.402 | 0.745 | 2.372 |
| ACOT13 | 0.852  | 0.308 | 2.769  | 0.006 | 2.344 | 0.722 | 1.863  | 0.062 | 1.283 | 4.286 |
| ACOT11 | 0.17   | 0.296 | 0.575  | 0.565 | 1.186 | 0.351 | 0.529  | 0.597 | 0.664 | 2.119 |
| ACO2   | -0.08  | 0.295 | -0.271 | 0.786 | 0.923 | 0.273 | -0.282 | 0.778 | 0.517 | 1.647 |
| ACO1   | 0.19   | 0.295 | 0.642  | 0.521 | 1.209 | 0.357 | 0.585  | 0.559 | 0.678 | 2.157 |
| ACLY   | 0.666  | 0.31  | 2.15   | 0.032 | 1.947 | 0.603 | 1.57   | 0.116 | 1.061 | 3.573 |
| ACKR4  | -0.516 | 0.302 | -1.706 | 0.088 | 0.597 | 0.181 | -2.233 | 0.026 | 0.33  | 1.08  |
| ACKR3  | 0.256  | 0.298 | 0.86   | 0.39  | 1.292 | 0.384 | 0.758  | 0.448 | 0.721 | 2.315 |
| ACKR2  | -0.394 | 0.3   | -1.314 | 0.189 | 0.674 | 0.202 | -1.61  | 0.107 | 0.374 | 1.214 |
| ACKR1  | -0.46  | 0.3   | -1.534 | 0.125 | 0.632 | 0.189 | -1.947 | 0.052 | 0.351 | 1.136 |
| ACIN1  | -0.392 | 0.3   | -1.307 | 0.191 | 0.676 | 0.203 | -1.601 | 0.109 | 0.376 | 1.216 |
| ACHE   | 0.251  | 0.301 | 0.833  | 0.405 | 1.285 | 0.387 | 0.736  | 0.461 | 0.712 | 2.318 |
| ACE2   | -0.147 | 0.298 | -0.494 | 0.621 | 0.863 | 0.257 | -0.532 | 0.595 | 0.482 | 1.547 |
| ACE    | 0.147  | 0.295 | 0.498  | 0.618 | 1.159 | 0.342 | 0.463  | 0.643 | 0.649 | 2.067 |
| ACD    | 0.314  | 0.297 | 1.059  | 0.29  | 1.369 | 0.406 | 0.909  | 0.364 | 0.765 | 2.448 |
| ACBD4  | 0.106  | 0.296 | 0.358  | 0.72  | 1.112 | 0.329 | 0.34   | 0.734 | 0.623 | 1.985 |
| ACBD3  | 0.054  | 0.296 | 0.182  | 0.856 | 1.055 | 0.312 | 0.177  | 0.86  | 0.591 | 1.883 |
| ACAT2  | 0.022  | 0.295 | 0.074  | 0.941 | 1.022 | 0.302 | 0.073  | 0.942 | 0.573 | 1.824 |
| ACAT1  | 0.009  | 0.295 | 0.032  | 0.974 | 1.009 | 0.298 | 0.032  | 0.975 | 0.566 | 1.8   |
| ACAP2  | 0.041  | 0.295 | 0.14   | 0.888 | 1.042 | 0.308 | 0.137  | 0.891 | 0.584 | 1.859 |
| ACAP1  | -0.195 | 0.295 | -0.659 | 0.51  | 0.823 | 0.243 | -0.728 | 0.467 | 0.461 | 1.469 |
| ACAN   | -0.466 | 0.3   | -1.554 | 0.12  | 0.627 | 0.188 | -1.98  | 0.048 | 0.348 | 1.13  |
| ACADVL | -0.445 | 0.3   | -1.482 | 0.138 | 0.641 | 0.192 | -1.866 | 0.062 | 0.356 | 1.154 |
| ACADSB | -0.205 | 0.298 | -0.689 | 0.491 | 0.814 | 0.243 | -0.765 | 0.445 | 0.454 | 1.461 |
| ACADS  | -0.233 | 0.298 | -0.784 | 0.433 | 0.792 | 0.236 | -0.883 | 0.377 | 0.442 | 1.419 |

|          |        |       |        |       |       |       |        |       |       |       |
|----------|--------|-------|--------|-------|-------|-------|--------|-------|-------|-------|
| ACADM    | -0.171 | 0.297 | -0.576 | 0.565 | 0.843 | 0.25  | -0.628 | 0.53  | 0.471 | 1.509 |
| ACADL    | -0.267 | 0.296 | -0.9   | 0.368 | 0.766 | 0.227 | -1.032 | 0.302 | 0.428 | 1.369 |
| ACAD8    | -0.799 | 0.311 | -2.573 | 0.01  | 0.45  | 0.14  | -3.941 | 0     | 0.245 | 0.826 |
| ACAD10   | 0.268  | 0.297 | 0.901  | 0.367 | 1.307 | 0.388 | 0.791  | 0.429 | 0.73  | 2.34  |
| ACACB    | -0.493 | 0.303 | -1.629 | 0.103 | 0.611 | 0.185 | -2.105 | 0.035 | 0.337 | 1.106 |
| ACACA    | 0.245  | 0.299 | 0.82   | 0.412 | 1.277 | 0.381 | 0.727  | 0.467 | 0.712 | 2.293 |
| ACAA2    | 0.252  | 0.297 | 0.846  | 0.397 | 1.286 | 0.382 | 0.748  | 0.454 | 0.718 | 2.304 |
| ACAA1    | -0.458 | 0.303 | -1.515 | 0.13  | 0.632 | 0.191 | -1.922 | 0.055 | 0.349 | 1.144 |
| ABTB2    | 0.392  | 0.3   | 1.306  | 0.192 | 1.479 | 0.444 | 1.081  | 0.28  | 0.822 | 2.663 |
| ABT1     | -0.316 | 0.298 | -1.059 | 0.289 | 0.729 | 0.217 | -1.246 | 0.213 | 0.407 | 1.308 |
| ABRAXAS2 | 0.088  | 0.296 | 0.297  | 0.767 | 1.092 | 0.323 | 0.284  | 0.776 | 0.612 | 1.948 |
| ABR      | -0.635 | 0.306 | -2.078 | 0.038 | 0.53  | 0.162 | -2.903 | 0.004 | 0.291 | 0.964 |
| ABO      | 0.22   | 0.296 | 0.742  | 0.458 | 1.246 | 0.369 | 0.666  | 0.505 | 0.697 | 2.228 |
| ABLIM3   | -0.184 | 0.298 | -0.619 | 0.536 | 0.832 | 0.248 | -0.68  | 0.497 | 0.464 | 1.491 |
| ABLIM1   | -0.487 | 0.302 | -1.611 | 0.107 | 0.615 | 0.186 | -2.075 | 0.038 | 0.34  | 1.111 |
| ABL2     | 0.084  | 0.295 | 0.283  | 0.777 | 1.087 | 0.321 | 0.272  | 0.786 | 0.609 | 1.94  |
| ABL1     | -0.276 | 0.296 | -0.932 | 0.351 | 0.759 | 0.225 | -1.073 | 0.283 | 0.424 | 1.356 |
| ABITRAM  | 0.329  | 0.298 | 1.104  | 0.269 | 1.389 | 0.413 | 0.941  | 0.347 | 0.775 | 2.489 |
| ABI3BP   | -0.043 | 0.297 | -0.145 | 0.884 | 0.958 | 0.285 | -0.149 | 0.882 | 0.535 | 1.715 |
| ABI2     | -0.26  | 0.298 | -0.874 | 0.382 | 0.771 | 0.229 | -0.999 | 0.318 | 0.43  | 1.381 |
| ABI1     | 0.185  | 0.296 | 0.623  | 0.534 | 1.203 | 0.356 | 0.568  | 0.57  | 0.673 | 2.15  |
| ABHD8    | 0.354  | 0.298 | 1.189  | 0.234 | 1.425 | 0.425 | 1.001  | 0.317 | 0.795 | 2.557 |
| ABHD6    | 0.332  | 0.298 | 1.116  | 0.264 | 1.394 | 0.415 | 0.95   | 0.342 | 0.778 | 2.498 |
| ABHD5    | 0.675  | 0.303 | 2.225  | 0.026 | 1.963 | 0.595 | 1.618  | 0.106 | 1.084 | 3.557 |
| ABHD4    | -0.38  | 0.3   | -1.269 | 0.204 | 0.684 | 0.205 | -1.544 | 0.123 | 0.38  | 1.23  |
| ABHD3    | -0.399 | 0.3   | -1.332 | 0.183 | 0.671 | 0.201 | -1.637 | 0.102 | 0.373 | 1.207 |
| ABHD2    | -0.187 | 0.296 | -0.632 | 0.527 | 0.829 | 0.246 | -0.695 | 0.487 | 0.464 | 1.482 |
| ABHD18   | -0.01  | 0.295 | -0.035 | 0.972 | 0.99  | 0.292 | -0.036 | 0.972 | 0.555 | 1.764 |
| ABHD17B  | -0.435 | 0.3   | -1.448 | 0.148 | 0.647 | 0.194 | -1.813 | 0.07  | 0.359 | 1.166 |
| ABHD17A  | -0.002 | 0.298 | -0.008 | 0.994 | 0.998 | 0.297 | -0.008 | 0.994 | 0.556 | 1.788 |
| ABHD11   | 0.325  | 0.298 | 1.091  | 0.275 | 1.384 | 0.412 | 0.932  | 0.351 | 0.772 | 2.479 |
| ABHD10   | -0.613 | 0.303 | -2.025 | 0.043 | 0.541 | 0.164 | -2.795 | 0.005 | 0.299 | 0.981 |
| ABCG5    | 0.101  | 0.296 | 0.342  | 0.733 | 1.106 | 0.328 | 0.325  | 0.745 | 0.619 | 1.977 |
| ABCG4    | 0.423  | 0.3   | 1.414  | 0.158 | 1.527 | 0.458 | 1.152  | 0.249 | 0.849 | 2.748 |
| ABCG2    | -0.172 | 0.296 | -0.582 | 0.561 | 0.842 | 0.249 | -0.635 | 0.525 | 0.471 | 1.504 |
| ABCG1    | -0.552 | 0.306 | -1.804 | 0.071 | 0.576 | 0.176 | -2.407 | 0.016 | 0.316 | 1.049 |
| ABCF3    | 0.355  | 0.3   | 1.185  | 0.236 | 1.426 | 0.427 | 0.998  | 0.318 | 0.793 | 2.566 |
| ABCF2    | -0.351 | 0.3   | -1.172 | 0.241 | 0.704 | 0.211 | -1.404 | 0.16  | 0.391 | 1.267 |

|         |        |       |        |       |       |       |        |       |       |       |
|---------|--------|-------|--------|-------|-------|-------|--------|-------|-------|-------|
| ABCF1   | 0.379  | 0.303 | 1.25   | 0.211 | 1.461 | 0.443 | 1.04   | 0.298 | 0.806 | 2.646 |
| ABCE1   | 0.11   | 0.296 | 0.37   | 0.711 | 1.116 | 0.33  | 0.351  | 0.726 | 0.625 | 1.993 |
| ABCD4   | -0.468 | 0.3   | -1.56  | 0.119 | 0.626 | 0.188 | -1.989 | 0.047 | 0.348 | 1.128 |
| ABCD3   | 0.053  | 0.297 | 0.177  | 0.86  | 1.054 | 0.313 | 0.172  | 0.863 | 0.589 | 1.887 |
| ABCD2   | -0.158 | 0.296 | -0.533 | 0.594 | 0.854 | 0.253 | -0.577 | 0.564 | 0.478 | 1.526 |
| ABCD1   | 0.307  | 0.298 | 1.031  | 0.303 | 1.359 | 0.405 | 0.888  | 0.375 | 0.758 | 2.436 |
| ABCC9   | -0.538 | 0.306 | -1.761 | 0.078 | 0.584 | 0.178 | -2.333 | 0.02  | 0.321 | 1.063 |
| ABCC8   | -0.05  | 0.296 | -0.169 | 0.865 | 0.951 | 0.281 | -0.174 | 0.862 | 0.533 | 1.699 |
| ABCC6   | -0.205 | 0.296 | -0.693 | 0.488 | 0.814 | 0.241 | -0.769 | 0.442 | 0.456 | 1.456 |
| ABCC5   | 0.892  | 0.321 | 2.781  | 0.005 | 2.439 | 0.782 | 1.84   | 0.066 | 1.301 | 4.571 |
| ABCC4   | -0.025 | 0.296 | -0.084 | 0.933 | 0.976 | 0.288 | -0.085 | 0.932 | 0.547 | 1.741 |
| ABCC3   | 0.118  | 0.296 | 0.399  | 0.69  | 1.126 | 0.334 | 0.376  | 0.707 | 0.629 | 2.012 |
| ABCC2   | 0.017  | 0.295 | 0.057  | 0.954 | 1.017 | 0.3   | 0.057  | 0.955 | 0.57  | 1.815 |
| ABCC10  | 0.437  | 0.303 | 1.443  | 0.149 | 1.548 | 0.469 | 1.169  | 0.242 | 0.855 | 2.803 |
| ABCC1   | 0.746  | 0.315 | 2.369  | 0.018 | 2.109 | 0.664 | 1.669  | 0.095 | 1.138 | 3.911 |
| ABCB9   | 0.385  | 0.298 | 1.289  | 0.197 | 1.469 | 0.438 | 1.07   | 0.285 | 0.819 | 2.637 |
| ABCB8   | -0.707 | 0.315 | -2.245 | 0.025 | 0.493 | 0.155 | -3.264 | 0.001 | 0.266 | 0.914 |
| ABCB7   | 0.345  | 0.299 | 1.155  | 0.248 | 1.412 | 0.422 | 0.976  | 0.329 | 0.786 | 2.537 |
| ABCB6   | 0.408  | 0.3   | 1.36   | 0.174 | 1.503 | 0.45  | 1.117  | 0.264 | 0.835 | 2.705 |
| ABCB4   | -0.21  | 0.296 | -0.709 | 0.478 | 0.811 | 0.24  | -0.789 | 0.43  | 0.454 | 1.448 |
| ABCB11  | -0.672 | 0.311 | -2.163 | 0.031 | 0.511 | 0.159 | -3.084 | 0.002 | 0.278 | 0.939 |
| ABCB1   | -0.752 | 0.306 | -2.453 | 0.014 | 0.472 | 0.145 | -3.656 | 0     | 0.259 | 0.86  |
| ABCA8   | -0.601 | 0.302 | -1.987 | 0.047 | 0.548 | 0.166 | -2.724 | 0.006 | 0.303 | 0.992 |
| ABCA7   | -0.014 | 0.295 | -0.047 | 0.962 | 0.986 | 0.291 | -0.048 | 0.962 | 0.553 | 1.758 |
| ABCA6   | -0.416 | 0.298 | -1.394 | 0.163 | 0.66  | 0.197 | -1.729 | 0.084 | 0.368 | 1.184 |
| ABCA5   | -0.021 | 0.296 | -0.072 | 0.942 | 0.979 | 0.289 | -0.073 | 0.942 | 0.548 | 1.748 |
| ABCA4   | 0.767  | 0.31  | 2.476  | 0.013 | 2.153 | 0.667 | 1.729  | 0.084 | 1.173 | 3.951 |
| ABCA3   | -0.034 | 0.297 | -0.114 | 0.91  | 0.967 | 0.287 | -0.116 | 0.908 | 0.54  | 1.73  |
| ABCA2   | -0.041 | 0.295 | -0.141 | 0.888 | 0.959 | 0.283 | -0.143 | 0.886 | 0.538 | 1.711 |
| ABCA12  | -0.323 | 0.299 | -1.079 | 0.281 | 0.724 | 0.217 | -1.273 | 0.203 | 0.403 | 1.301 |
| ABCA11P | -0.44  | 0.3   | -1.468 | 0.142 | 0.644 | 0.193 | -1.844 | 0.065 | 0.358 | 1.159 |
| ABCA1   | -0.547 | 0.301 | -1.814 | 0.07  | 0.579 | 0.174 | -2.414 | 0.016 | 0.321 | 1.045 |
| ABAT    | -0.176 | 0.297 | -0.595 | 0.552 | 0.838 | 0.249 | -0.65  | 0.516 | 0.469 | 1.499 |
| AATK    | 0.101  | 0.295 | 0.342  | 0.732 | 1.106 | 0.327 | 0.326  | 0.745 | 0.62  | 1.974 |
| AATF    | 0.567  | 0.303 | 1.873  | 0.061 | 1.764 | 0.535 | 1.429  | 0.153 | 0.974 | 3.195 |
| AASS    | -0.305 | 0.298 | -1.025 | 0.305 | 0.737 | 0.219 | -1.198 | 0.231 | 0.411 | 1.321 |
| AASDHPT | -0.159 | 0.296 | -0.537 | 0.591 | 0.853 | 0.253 | -0.582 | 0.56  | 0.477 | 1.524 |
| AARS1   | -0.009 | 0.297 | -0.03  | 0.976 | 0.991 | 0.295 | -0.03  | 0.976 | 0.553 | 1.775 |

|        |        |       |        |       |       |       |        |       |       |       |
|--------|--------|-------|--------|-------|-------|-------|--------|-------|-------|-------|
| AAR2   | 0.212  | 0.298 | 0.711  | 0.477 | 1.236 | 0.369 | 0.641  | 0.522 | 0.689 | 2.218 |
| AANAT  | 0.074  | 0.296 | 0.251  | 0.802 | 1.077 | 0.318 | 0.242  | 0.809 | 0.603 | 1.922 |
| AAMP   | -0.199 | 0.296 | -0.671 | 0.502 | 0.82  | 0.243 | -0.742 | 0.458 | 0.459 | 1.465 |
| AAMDC  | 0.778  | 0.307 | 2.534  | 0.011 | 2.176 | 0.668 | 1.762  | 0.078 | 1.193 | 3.971 |
| AAK1   | 0.32   | 0.3   | 1.066  | 0.286 | 1.377 | 0.413 | 0.912  | 0.362 | 0.765 | 2.479 |
| AAGAB  | 0.101  | 0.296 | 0.34   | 0.734 | 1.106 | 0.328 | 0.323  | 0.747 | 0.619 | 1.977 |
| AADAC  | 0.029  | 0.295 | 0.1    | 0.92  | 1.03  | 0.304 | 0.098  | 0.922 | 0.578 | 1.836 |
| AACS   | -0.358 | 0.3   | -1.196 | 0.232 | 0.699 | 0.209 | -1.438 | 0.15  | 0.388 | 1.257 |
| AAAS   | -0.064 | 0.297 | -0.214 | 0.83  | 0.938 | 0.279 | -0.221 | 0.825 | 0.524 | 1.679 |
| A4GNT  | 0.204  | 0.296 | 0.687  | 0.492 | 1.226 | 0.363 | 0.622  | 0.534 | 0.686 | 2.191 |
| A4GALT | 0.451  | 0.3   | 1.504  | 0.133 | 1.57  | 0.471 | 1.21   | 0.226 | 0.872 | 2.827 |
| A2M    | -0.484 | 0.3   | -1.613 | 0.107 | 0.616 | 0.185 | -2.074 | 0.038 | 0.342 | 1.11  |
| A1CF   | 0.114  | 0.297 | 0.383  | 0.701 | 1.121 | 0.333 | 0.362  | 0.717 | 0.626 | 2.005 |

Supplementary Table 2. Gene Ontology Pathway Enrichment Analysis of all metastases-related genes

| ONTOLOG | ID         | Description                                                | GeneRatio | BgRatio   | pvalue   | p.adjust | qvalue   | genelD    | Count |
|---------|------------|------------------------------------------------------------|-----------|-----------|----------|----------|----------|-----------|-------|
| BP      | GO:0044839 | cell cycle G2/M phase transition                           | 47/808    | 273/18866 | 2.54E-16 | 1.28E-12 | 1.13E-12 | 7480/1008 | 47    |
| BP      | GO:0140014 | mitotic nuclear division                                   | 47/808    | 286/18866 | 1.63E-15 | 3.09E-12 | 2.73E-12 | 11130/110 | 47    |
| BP      | GO:0000086 | G2/M transition of mitotic cell cycle                      | 44/808    | 254/18866 | 1.84E-15 | 3.09E-12 | 2.73E-12 | 7480/1008 | 44    |
| BP      | GO:1901990 | regulation of mitotic cell cycle phase transition          | 59/808    | 448/18866 | 1.30E-14 | 1.62E-11 | 1.43E-11 | 7480/1106 | 59    |
| BP      | GO:0048285 | organelle fission                                          | 61/808    | 476/18866 | 1.61E-14 | 1.62E-11 | 1.43E-11 | 11130/755 | 61    |
| BP      | GO:1902749 | regulation of cell cycle G2/M phase transition             | 39/808    | 217/18866 | 2.16E-14 | 1.65E-11 | 1.46E-11 | 7480/2297 | 39    |
| BP      | GO:0000280 | nuclear division                                           | 57/808    | 428/18866 | 2.29E-14 | 1.65E-11 | 1.46E-11 | 11130/755 | 57    |
| BP      | GO:0000070 | mitotic sister chromatid segregation                       | 33/808    | 161/18866 | 4.57E-14 | 2.88E-11 | 2.54E-11 | 11130/110 | 33    |
| BP      | GO:1901987 | regulation of cell cycle phase transition                  | 60/808    | 486/18866 | 1.41E-13 | 7.92E-11 | 7.00E-11 | 7480/1106 | 60    |
| BP      | GO:0010389 | regulation of G2/M transition of mitotic cell cycle        | 36/808    | 200/18866 | 2.09E-13 | 1.05E-10 | 9.29E-11 | 7480/2297 | 36    |
| BP      | GO:0007088 | regulation of mitotic nuclear division                     | 32/808    | 163/18866 | 3.89E-13 | 1.68E-10 | 1.48E-10 | 11065/931 | 32    |
| BP      | GO:0031145 | anaphase-promoting complex-dependent                       | 23/808    | 83/18866  | 3.99E-13 | 1.68E-10 | 1.48E-10 | 11065/731 | 23    |
| BP      | GO:0051783 | regulation of nuclear division                             | 34/808    | 188/18866 | 8.49E-13 | 3.29E-10 | 2.91E-10 | 7552/1106 | 34    |
| BP      | GO:0007059 | chromosome segregation                                     | 46/808    | 334/18866 | 2.39E-12 | 8.58E-10 | 7.58E-10 | 11130/110 | 46    |
| BP      | GO:0051983 | regulation of chromosome segregation                       | 25/808    | 107/18866 | 2.55E-12 | 8.58E-10 | 7.58E-10 | 11065/931 | 25    |
| BP      | GO:0000819 | sister chromatid segregation                               | 34/808    | 196/18866 | 2.90E-12 | 9.13E-10 | 8.07E-10 | 11130/110 | 34    |
| BP      | GO:0010965 | regulation of mitotic sister chromatid separation          | 19/808    | 61/18866  | 4.44E-12 | 1.32E-09 | 1.16E-09 | 11065/931 | 19    |
| BP      | GO:0045930 | negative regulation of mitotic cell cycle                  | 46/808    | 341/18866 | 4.99E-12 | 1.40E-09 | 1.24E-09 | 11130/931 | 46    |
| BP      | GO:0010948 | negative regulation of cell cycle process                  | 47/808    | 359/18866 | 8.55E-12 | 2.27E-09 | 2.00E-09 | 9319/5149 | 47    |
| BP      | GO:0051306 | mitotic sister chromatid separation                        | 19/808    | 64/18866  | 1.16E-11 | 2.91E-09 | 2.57E-09 | 11065/931 | 19    |
| BP      | GO:0033047 | regulation of mitotic sister chromatid segregation         | 20/808    | 72/18866  | 1.30E-11 | 3.12E-09 | 2.76E-09 | 11065/931 | 20    |
| BP      | GO:1902850 | microtubule cytoskeleton organization involved in          | 28/808    | 144/18866 | 1.47E-11 | 3.36E-09 | 2.97E-09 | 22974/104 | 28    |
| BP      | GO:1905818 | regulation of chromosome separation                        | 19/808    | 66/18866  | 2.11E-11 | 4.63E-09 | 4.09E-09 | 11065/931 | 19    |
| BP      | GO:1901988 | negative regulation of cell cycle phase transition         | 39/808    | 270/18866 | 2.65E-11 | 5.57E-09 | 4.92E-09 | 9319/5149 | 39    |
| BP      | GO:1901991 | negative regulation of mitotic cell cycle phase transition | 37/808    | 251/18866 | 4.72E-11 | 9.51E-09 | 8.41E-09 | 9319/5149 | 37    |
| BP      | GO:0051304 | chromosome separation                                      | 22/808    | 94/18866  | 5.07E-11 | 9.83E-09 | 8.69E-09 | 11065/931 | 22    |
| BP      | GO:0033044 | regulation of chromosome organization                      | 45/808    | 356/18866 | 7.85E-11 | 1.46E-08 | 1.29E-08 | 55100/597 | 45    |
| BP      | GO:0098813 | nuclear chromosome segregation                             | 38/808    | 272/18866 | 1.30E-10 | 2.34E-08 | 2.07E-08 | 11130/110 | 38    |
| BP      | GO:0007091 | metaphase/anaphase transition of mitotic cell cycle        | 17/808    | 58/18866  | 1.76E-10 | 3.06E-08 | 2.70E-08 | 11065/931 | 17    |
| BP      | GO:0090068 | positive regulation of cell cycle process                  | 40/808    | 302/18866 | 2.19E-10 | 3.68E-08 | 3.25E-08 | 7552/7480 | 40    |
| BP      | GO:0007051 | spindle organization                                       | 30/808    | 183/18866 | 2.35E-10 | 3.82E-08 | 3.38E-08 | 22974/104 | 30    |
| BP      | GO:0071103 | DNA conformation change                                    | 44/808    | 355/18866 | 2.43E-10 | 3.82E-08 | 3.38E-08 | 7314/7153 | 44    |
| BP      | GO:0033045 | regulation of sister chromatid segregation                 | 20/808    | 84/18866  | 2.75E-10 | 4.20E-08 | 3.71E-08 | 11065/931 | 20    |
| BP      | GO:0044784 | metaphase/anaphase transition of cell cycle                | 17/808    | 60/18866  | 3.18E-10 | 4.72E-08 | 4.17E-08 | 11065/931 | 17    |
| BP      | GO:2001251 | negative regulation of chromosome organization             | 26/808    | 148/18866 | 8.02E-10 | 1.15E-07 | 1.02E-07 | 9319/7153 | 26    |
| BP      | GO:0030071 | regulation of mitotic metaphase/anaphase transition        | 16/808    | 56/18866  | 9.24E-10 | 1.29E-07 | 1.14E-07 | 11065/931 | 16    |



|    |            |                                                                           |        |           |          |          |          |           |    |
|----|------------|---------------------------------------------------------------------------|--------|-----------|----------|----------|----------|-----------|----|
| BP | GO:1902099 | regulation of metaphase/anaphase transition                               | 16/808 | 58/18866  | 1.64E-09 | 2.23E-07 | 1.97E-07 | 11065/931 | 16 |
| BP | GO:0033046 | negative regulation of sister chromatid segregation                       | 14/808 | 44/18866  | 2.17E-09 | 2.88E-07 | 2.54E-07 | 9319/5490 | 14 |
| BP | GO:0051985 | negative regulation of chromosome segregation                             | 14/808 | 45/18866  | 3.03E-09 | 3.91E-07 | 3.45E-07 | 9319/5490 | 14 |
| BP | GO:0010639 | negative regulation of organelle organization                             | 46/808 | 416/18866 | 3.98E-09 | 5.02E-07 | 4.44E-07 | 7429/9319 | 46 |
| BP | GO:2000816 | negative regulation of mitotic sister chromatid segregation               | 13/808 | 39/18866  | 4.28E-09 | 5.27E-07 | 4.65E-07 | 9319/5490 | 13 |
| BP | GO:0065004 | protein-DNA complex assembly                                              | 33/808 | 243/18866 | 4.45E-09 | 5.34E-07 | 4.72E-07 | 7480/7314 | 33 |
| BP | GO:0071824 | protein-DNA complex subunit organization                                  | 36/808 | 282/18866 | 4.80E-09 | 5.62E-07 | 4.97E-07 | 7480/6944 | 36 |
| BP | GO:0007052 | mitotic spindle organization                                              | 22/808 | 118/18866 | 5.10E-09 | 5.79E-07 | 5.11E-07 | 22974/104 | 22 |
| BP | GO:1902750 | negative regulation of cell cycle G2/M phase transition                   | 21/808 | 108/18866 | 5.17E-09 | 5.79E-07 | 5.11E-07 | 5885/5713 | 21 |
| BP | GO:1905819 | negative regulation of chromosome separation                              | 13/808 | 40/18866  | 6.10E-09 | 6.68E-07 | 5.90E-07 | 9319/5490 | 13 |
| BP | GO:0045787 | positive regulation of cell cycle                                         | 44/808 | 396/18866 | 7.53E-09 | 8.07E-07 | 7.13E-07 | 7552/7480 | 44 |
| BP | GO:1902036 | regulation of hematopoietic stem cell differentiation                     | 17/808 | 73/18866  | 8.61E-09 | 9.05E-07 | 7.99E-07 | 10413/571 | 17 |
| BP | GO:0033048 | negative regulation of mitotic sister chromatid segregation               | 13/808 | 42/18866  | 1.19E-08 | 1.23E-06 | 1.09E-06 | 9319/5490 | 13 |
| BP | GO:0061418 | regulation of transcription from RNA polymerase II promoter               | 17/808 | 77/18866  | 2.04E-08 | 2.05E-06 | 1.81E-06 | 7314/5713 | 17 |
| BP | GO:0051784 | negative regulation of nuclear division                                   | 15/808 | 60/18866  | 2.31E-08 | 2.28E-06 | 2.02E-06 | 9319/5490 | 15 |
| BP | GO:0045839 | negative regulation of mitotic nuclear division                           | 14/808 | 52/18866  | 2.43E-08 | 2.35E-06 | 2.08E-06 | 9319/5490 | 14 |
| BP | GO:0006521 | regulation of cellular amino acid metabolic process                       | 15/808 | 63/18866  | 4.70E-08 | 4.47E-06 | 3.95E-06 | 5713/5708 | 15 |
| BP | GO:0070498 | interleukin-1-mediated signaling pathway                                  | 19/808 | 103/18866 | 6.73E-08 | 6.28E-06 | 5.55E-06 | 7444/7314 | 19 |
| BP | GO:0006260 | DNA replication                                                           | 33/808 | 273/18866 | 7.92E-08 | 7.26E-06 | 6.42E-06 | 58525/597 | 33 |
| BP | GO:0010972 | negative regulation of G2/M transition of mitotic cell cycle              | 18/808 | 96/18866  | 1.15E-07 | 1.02E-05 | 8.99E-06 | 5885/5713 | 18 |
| BP | GO:1901532 | regulation of hematopoietic progenitor cell differentiation               | 17/808 | 86/18866  | 1.15E-07 | 1.02E-05 | 8.99E-06 | 10413/571 | 17 |
| BP | GO:0060218 | hematopoietic stem cell differentiation                                   | 17/808 | 87/18866  | 1.37E-07 | 1.19E-05 | 1.05E-05 | 10413/571 | 17 |
| BP | GO:0006323 | DNA packaging                                                             | 30/808 | 240/18866 | 1.47E-07 | 1.25E-05 | 1.11E-05 | 7153/1104 | 30 |
| BP | GO:0045841 | negative regulation of mitotic metaphase/anaphase transition              | 11/808 | 36/18866  | 1.87E-07 | 1.57E-05 | 1.39E-05 | 9319/5490 | 11 |
| BP | GO:0000075 | cell cycle checkpoint                                                     | 28/808 | 219/18866 | 2.37E-07 | 1.96E-05 | 1.73E-05 | 11130/799 | 28 |
| BP | GO:1902100 | negative regulation of metaphase/anaphase transition                      | 11/808 | 37/18866  | 2.56E-07 | 2.08E-05 | 1.84E-05 | 9319/5490 | 11 |
| BP | GO:0006333 | chromatin assembly or disassembly                                         | 28/808 | 220/18866 | 2.61E-07 | 2.09E-05 | 1.85E-05 | 79723/660 | 28 |
| BP | GO:0033238 | regulation of cellular amine metabolic process                            | 16/808 | 81/18866  | 2.73E-07 | 2.15E-05 | 1.90E-05 | 55737/571 | 16 |
| BP | GO:0045814 | negative regulation of gene expression, epigenetic                        | 20/808 | 126/18866 | 3.99E-07 | 3.09E-05 | 2.73E-05 | 55183/593 | 20 |
| BP | GO:0043161 | proteasome-mediated ubiquitin-dependent protein catabolic process         | 42/808 | 424/18866 | 4.11E-07 | 3.14E-05 | 2.77E-05 | 11060/748 | 42 |
| BP | GO:0034508 | centromere complex assembly                                               | 13/808 | 56/18866  | 5.08E-07 | 3.82E-05 | 3.37E-05 | 5931/5532 | 13 |
| BP | GO:2000736 | regulation of stem cell differentiation                                   | 19/808 | 118/18866 | 6.18E-07 | 4.58E-05 | 4.05E-05 | 10413/677 | 19 |
| BP | GO:0007093 | mitotic cell cycle checkpoint                                             | 23/808 | 166/18866 | 6.77E-07 | 4.94E-05 | 4.37E-05 | 11130/931 | 23 |
| BP | GO:0097549 | chromatin organization involved in negative regulation of gene expression | 21/808 | 143/18866 | 7.79E-07 | 5.61E-05 | 4.96E-05 | 23378/551 | 21 |
| BP | GO:0006334 | nucleosome assembly                                                       | 21/808 | 145/18866 | 9.84E-07 | 6.92E-05 | 6.11E-05 | 5931/5532 | 21 |
| BP | GO:0031497 | chromatin assembly                                                        | 25/808 | 195/18866 | 9.88E-07 | 6.92E-05 | 6.11E-05 | 23378/593 | 25 |
| BP | GO:0000910 | cytokinesis                                                               | 23/808 | 172/18866 | 1.27E-06 | 8.79E-05 | 7.77E-05 | 3925/1061 | 23 |
| BP | GO:0043488 | regulation of mRNA stability                                              | 24/808 | 186/18866 | 1.44E-06 | 9.83E-05 | 8.68E-05 | 54915/597 | 24 |

|    |            |                                               |        |           |          |          |          |           |    |
|----|------------|-----------------------------------------------|--------|-----------|----------|----------|----------|-----------|----|
| BP | GO:0034470 | ncRNA processing                              | 39/808 | 400/18866 | 1.58E-06 | 0.000106 | 9.36E-05 | 23160/270 | 39 |
| BP | GO:0006310 | DNA recombination                             | 32/808 | 299/18866 | 1.91E-06 | 0.000125 | 0.00011  | 7552/7516 | 32 |
| BP | GO:0010565 | regulation of cellular ketone metabolic pro   | 24/808 | 189/18866 | 1.92E-06 | 0.000125 | 0.00011  | 23408/571 | 24 |
| BP | GO:0006261 | DNA-dependent DNA replication                 | 21/808 | 151/18866 | 1.93E-06 | 0.000125 | 0.00011  | 58525/597 | 21 |
| BP | GO:1903311 | regulation of mRNA metabolic process          | 35/808 | 344/18866 | 2.06E-06 | 0.000131 | 0.000116 | 54915/597 | 35 |
| BP | GO:0070507 | regulation of microtubule cytoskeleton org    | 24/808 | 190/18866 | 2.12E-06 | 0.000133 | 0.000117 | 22974/104 | 24 |
| BP | GO:0010498 | proteasomal protein catabolic process         | 44/808 | 483/18866 | 2.14E-06 | 0.000133 | 0.000117 | 11060/748 | 44 |
| BP | GO:0006338 | chromatin remodeling                          | 26/808 | 218/18866 | 2.40E-06 | 0.000146 | 0.000129 | 6944/7019 | 26 |
| BP | GO:0036294 | cellular response to decreased oxygen leve    | 26/808 | 218/18866 | 2.40E-06 | 0.000146 | 0.000129 | 7314/5710 | 26 |
| BP | GO:0071453 | cellular response to oxygen levels            | 27/808 | 235/18866 | 3.18E-06 | 0.000191 | 0.000168 | 7314/5710 | 27 |
| BP | GO:0071456 | cellular response to hypoxia                  | 25/808 | 208/18866 | 3.25E-06 | 0.000192 | 0.00017  | 7314/5710 | 25 |
| BP | GO:0034401 | chromatin organization involved in regulati   | 21/808 | 156/18866 | 3.28E-06 | 0.000192 | 0.00017  | 23378/551 | 21 |
| BP | GO:0043487 | regulation of RNA stability                   | 24/808 | 195/18866 | 3.36E-06 | 0.000194 | 0.000172 | 54915/597 | 24 |
| BP | GO:0031055 | chromatin remodeling at centromere            | 11/808 | 47/18866  | 3.52E-06 | 0.000202 | 0.000178 | 5931/5532 | 11 |
| BP | GO:0034728 | nucleosome organization                       | 23/808 | 183/18866 | 3.74E-06 | 0.00021  | 0.000186 | 6944/6605 | 23 |
| BP | GO:0043618 | regulation of transcription from RNA polym    | 17/808 | 109/18866 | 3.75E-06 | 0.00021  | 0.000186 | 7314/5713 | 17 |
| BP | GO:0006270 | DNA replication initiation                    | 10/808 | 39/18866  | 4.03E-06 | 0.000223 | 0.000197 | 23594/499 | 10 |
| BP | GO:0045840 | positive regulation of mitotic nuclear divisi | 12/808 | 57/18866  | 4.20E-06 | 0.00023  | 0.000203 | 11065/703 | 12 |
| BP | GO:0032465 | regulation of cytokinesis                     | 15/808 | 90/18866  | 6.00E-06 | 0.000325 | 0.000287 | 6755/2912 | 15 |
| BP | GO:0000082 | G1/S transition of mitotic cell cycle         | 30/808 | 287/18866 | 6.39E-06 | 0.000343 | 0.000303 | 7298/5149 | 30 |
| BP | GO:0090263 | positive regulation of canonical Wnt signal   | 20/808 | 150/18866 | 6.47E-06 | 0.000343 | 0.000303 | 10413/748 | 20 |
| BP | GO:0140013 | meiotic nuclear division                      | 22/808 | 177/18866 | 7.25E-06 | 0.000381 | 0.000336 | 7552/7314 | 22 |
| BP | GO:0043620 | regulation of DNA-templated transcription     | 17/808 | 115/18866 | 7.88E-06 | 0.000405 | 0.000358 | 7314/5713 | 17 |
| BP | GO:0051225 | spindle assembly                              | 17/808 | 115/18866 | 7.88E-06 | 0.000405 | 0.000358 | 22974/106 | 17 |
| BP | GO:0006302 | double-strand break repair                    | 28/808 | 262/18866 | 8.51E-06 | 0.000433 | 0.000383 | 7516/5510 | 28 |
| BP | GO:0051785 | positive regulation of nuclear division       | 13/808 | 71/18866  | 8.62E-06 | 0.000434 | 0.000384 | 7552/1106 | 13 |
| BP | GO:0031146 | SCF-dependent proteasomal ubiquitin-dep       | 15/808 | 93/18866  | 9.09E-06 | 0.00044  | 0.000389 | 5713/5708 | 15 |
| BP | GO:1903046 | meiotic cell cycle process                    | 23/808 | 193/18866 | 9.18E-06 | 0.00044  | 0.000389 | 7552/7314 | 23 |
| BP | GO:0007094 | mitotic spindle assembly checkpoint           | 9/808  | 34/18866  | 9.26E-06 | 0.00044  | 0.000389 | 9319/5490 | 9  |
| BP | GO:0031577 | spindle checkpoint                            | 9/808  | 34/18866  | 9.26E-06 | 0.00044  | 0.000389 | 9319/5490 | 9  |
| BP | GO:0071173 | spindle assembly checkpoint                   | 9/808  | 34/18866  | 9.26E-06 | 0.00044  | 0.000389 | 9319/5490 | 9  |
| BP | GO:0071174 | mitotic spindle checkpoint                    | 9/808  | 34/18866  | 9.26E-06 | 0.00044  | 0.000389 | 9319/5490 | 9  |
| BP | GO:0009314 | response to radiation                         | 40/808 | 447/18866 | 9.45E-06 | 0.000445 | 0.000393 | 10413/751 | 40 |
| BP | GO:0061013 | regulation of mRNA catabolic process          | 24/808 | 208/18866 | 1.03E-05 | 0.000479 | 0.000424 | 54915/597 | 24 |
| BP | GO:1903706 | regulation of hemopoiesis                     | 43/808 | 498/18866 | 1.07E-05 | 0.000497 | 0.000439 | 10413/677 | 43 |
| BP | GO:0044843 | cell cycle G1/S phase transition              | 31/808 | 310/18866 | 1.11E-05 | 0.000506 | 0.000447 | 7298/5149 | 31 |
| BP | GO:0040029 | regulation of gene expression, epigenetic     | 24/808 | 209/18866 | 1.11E-05 | 0.000506 | 0.000447 | 5976/5518 | 24 |
| BP | GO:0016072 | rRNA metabolic process                        | 26/808 | 238/18866 | 1.20E-05 | 0.000535 | 0.000473 | 23160/270 | 26 |

|    |            |                                                           |        |           |          |          |          |           |    |
|----|------------|-----------------------------------------------------------|--------|-----------|----------|----------|----------|-----------|----|
| BP | GO:0040001 | establishment of mitotic spindle localization             | 9/808  | 35/18866  | 1.20E-05 | 0.000535 | 0.000473 | 54908/534 | 9  |
| BP | GO:0006336 | DNA replication-independent nucleosome assembly           | 11/808 | 53/18866  | 1.22E-05 | 0.000539 | 0.000476 | 5931/5532 | 11 |
| BP | GO:0071347 | cellular response to interleukin-1                        | 22/808 | 183/18866 | 1.24E-05 | 0.000544 | 0.000481 | 7444/9100 | 22 |
| BP | GO:0032886 | regulation of microtubule-based process                   | 26/808 | 240/18866 | 1.39E-05 | 0.000604 | 0.000533 | 22974/104 | 26 |
| BP | GO:0051302 | regulation of cell division                               | 21/808 | 171/18866 | 1.40E-05 | 0.000604 | 0.000533 | 7039/6755 | 21 |
| BP | GO:0034724 | DNA replication-independent nucleosome assembly           | 11/808 | 54/18866  | 1.47E-05 | 0.000624 | 0.000551 | 5931/5532 | 11 |
| BP | GO:0006402 | mRNA catabolic process                                    | 35/808 | 376/18866 | 1.47E-05 | 0.000624 | 0.000551 | 54915/597 | 35 |
| BP | GO:0042770 | signal transduction in response to DNA damage             | 18/808 | 133/18866 | 1.51E-05 | 0.000633 | 0.000559 | 9100/5149 | 18 |
| BP | GO:0006364 | rRNA processing                                           | 25/808 | 227/18866 | 1.53E-05 | 0.000633 | 0.000556 | 23160/270 | 25 |
| BP | GO:0002244 | hematopoietic progenitor cell differentiation             | 21/808 | 172/18866 | 1.53E-05 | 0.000633 | 0.000556 | 10413/715 | 21 |
| BP | GO:0002479 | antigen processing and presentation of exogenous peptides | 13/808 | 75/18866  | 1.60E-05 | 0.000657 | 0.000581 | 5713/5708 | 13 |
| BP | GO:0032200 | telomere organization                                     | 21/808 | 174/18866 | 1.83E-05 | 0.000744 | 0.000658 | 5976/5518 | 21 |
| BP | GO:0034660 | ncRNA metabolic process                                   | 42/808 | 493/18866 | 1.87E-05 | 0.000755 | 0.000667 | 23160/270 | 42 |
| BP | GO:0006342 | chromatin silencing                                       | 13/808 | 77/18866  | 2.15E-05 | 0.000861 | 0.00076  | 55183/849 | 13 |
| BP | GO:0061982 | meiosis I cell cycle process                              | 17/808 | 124/18866 | 2.18E-05 | 0.000864 | 0.000764 | 7552/7314 | 17 |
| BP | GO:0006401 | RNA catabolic process                                     | 37/808 | 415/18866 | 2.20E-05 | 0.000866 | 0.000765 | 54915/597 | 37 |
| BP | GO:0022613 | ribonucleoprotein complex biogenesis                      | 41/808 | 482/18866 | 2.43E-05 | 0.000951 | 0.00084  | 23160/270 | 41 |
| BP | GO:0010499 | proteasomal ubiquitin-independent protein degradation     | 7/808  | 22/18866  | 2.50E-05 | 0.000968 | 0.000855 | 5695/5691 | 7  |
| BP | GO:0009308 | amine metabolic process                                   | 18/808 | 140/18866 | 3.05E-05 | 0.001174 | 0.001038 | 55737/681 | 18 |
| BP | GO:0042590 | antigen processing and presentation of exogenous peptides | 13/808 | 80/18866  | 3.28E-05 | 0.001252 | 0.001106 | 5713/5708 | 13 |
| BP | GO:0072331 | signal transduction by p53 class mediator                 | 27/808 | 267/18866 | 3.30E-05 | 0.001252 | 0.001106 | 9100/7314 | 27 |
| BP | GO:0032392 | DNA geometric change                                      | 16/808 | 116/18866 | 3.50E-05 | 0.001307 | 0.001155 | 7314/7153 | 16 |
| BP | GO:0045931 | positive regulation of mitotic cell cycle                 | 20/808 | 168/18866 | 3.51E-05 | 0.001307 | 0.001155 | 7480/1106 | 20 |
| BP | GO:0016579 | protein deubiquitination                                  | 28/808 | 283/18866 | 3.53E-05 | 0.001307 | 0.001155 | 9097/2193 | 28 |
| BP | GO:0051321 | meiotic cell cycle                                        | 26/808 | 254/18866 | 3.73E-05 | 0.001374 | 0.001214 | 7552/7516 | 26 |
| BP | GO:0070555 | response to interleukin-1                                 | 23/808 | 211/18866 | 3.89E-05 | 0.001421 | 0.001256 | 7444/9100 | 23 |
| BP | GO:0044106 | cellular amine metabolic process                          | 17/808 | 131/18866 | 4.47E-05 | 0.001619 | 0.001431 | 55737/571 | 17 |
| BP | GO:0045089 | positive regulation of innate immune response             | 23/808 | 213/18866 | 4.52E-05 | 0.001625 | 0.001436 | 3093/1045 | 23 |
| BP | GO:0051052 | regulation of DNA metabolic process                       | 33/808 | 365/18866 | 4.59E-05 | 0.00164  | 0.001449 | 7644/7552 | 33 |
| BP | GO:0007127 | meiosis I                                                 | 16/808 | 119/18866 | 4.80E-05 | 0.001705 | 0.001506 | 7552/7314 | 16 |
| BP | GO:0000281 | mitotic cytokinesis                                       | 12/808 | 72/18866  | 5.06E-05 | 0.001783 | 0.001576 | 3925/1061 | 12 |
| BP | GO:0033209 | tumor necrosis factor-mediated signaling pathway          | 20/808 | 173/18866 | 5.35E-05 | 0.001872 | 0.001655 | 3093/2295 | 20 |
| BP | GO:0060071 | Wnt signaling pathway, planar cell polarity               | 15/808 | 108/18866 | 5.61E-05 | 0.001951 | 0.001724 | 5713/5708 | 15 |
| BP | GO:0006520 | cellular amino acid metabolic process                     | 31/808 | 340/18866 | 6.60E-05 | 0.002279 | 0.002014 | 6472/5713 | 31 |
| BP | GO:0090175 | regulation of establishment of planar polarity            | 15/808 | 110/18866 | 6.96E-05 | 0.002382 | 0.002105 | 5713/5708 | 15 |
| BP | GO:0034080 | CENP-A containing nucleosome assembly                     | 9/808  | 43/18866  | 7.04E-05 | 0.002382 | 0.002105 | 5931/5532 | 9  |
| BP | GO:0061641 | CENP-A containing chromatin organization                  | 9/808  | 43/18866  | 7.04E-05 | 0.002382 | 0.002105 | 5931/5532 | 9  |
| BP | GO:0042254 | ribosome biogenesis                                       | 29/808 | 310/18866 | 7.14E-05 | 0.002391 | 0.002113 | 23160/270 | 29 |

|    |            |                                                                 |        |           |          |          |          |           |    |
|----|------------|-----------------------------------------------------------------|--------|-----------|----------|----------|----------|-----------|----|
| BP | GO:0048863 | stem cell differentiation                                       | 26/808 | 264/18866 | 7.16E-05 | 0.002391 | 0.002113 | 10413/694 | 26 |
| BP | GO:0008608 | attachment of spindle microtubules to kinetochore               | 8/808  | 34/18866  | 7.36E-05 | 0.002435 | 0.002152 | 10615/291 | 8  |
| BP | GO:0002478 | antigen processing and presentation of exogenous peptides       | 20/808 | 177/18866 | 7.39E-05 | 0.002435 | 0.002152 | 29127/571 | 20 |
| BP | GO:0002833 | positive regulation of response to biotic stimulus              | 25/808 | 251/18866 | 8.17E-05 | 0.002675 | 0.002364 | 3093/1045 | 25 |
| BP | GO:0002831 | regulation of response to biotic stimulus                       | 35/808 | 409/18866 | 8.36E-05 | 0.002703 | 0.002389 | 3093/5710 | 35 |
| BP | GO:0035567 | non-canonical Wnt signaling pathway                             | 18/808 | 151/18866 | 8.37E-05 | 0.002703 | 0.002389 | 5713/5708 | 18 |
| BP | GO:0090305 | nucleic acid phosphodiester bond hydrolysis                     | 29/808 | 313/18866 | 8.47E-05 | 0.002718 | 0.002402 | 7314/7247 | 29 |
| BP | GO:0000727 | double-strand break repair via break-induced replication        | 5/808  | 12/18866  | 8.77E-05 | 0.002796 | 0.002471 | 4175/4174 | 5  |
| BP | GO:0044786 | cell cycle DNA replication                                      | 11/808 | 65/18866  | 8.96E-05 | 0.00284  | 0.00251  | 58525/597 | 11 |
| BP | GO:0061640 | cytoskeleton-dependent cytokinesis                              | 14/808 | 100/18866 | 9.02E-05 | 0.00284  | 0.00251  | 3925/1061 | 14 |
| BP | GO:0002223 | stimulatory C-type lectin receptor signaling                    | 15/808 | 113/18866 | 9.52E-05 | 0.002979 | 0.002633 | 10454/571 | 15 |
| BP | GO:0070646 | protein modification by small protein removal                   | 28/808 | 300/18866 | 9.83E-05 | 0.00306  | 0.002704 | 9097/2193 | 28 |
| BP | GO:0051293 | establishment of spindle localization                           | 9/808  | 45/18866  | 0.000103 | 0.00317  | 0.002801 | 54908/534 | 9  |
| BP | GO:0000460 | maturation of 5.8S rRNA                                         | 8/808  | 36/18866  | 0.000114 | 0.003495 | 0.003089 | 51018/622 | 8  |
| BP | GO:0043044 | ATP-dependent chromatin remodeling                              | 13/808 | 90/18866  | 0.000115 | 0.003523 | 0.003113 | 6944/6605 | 13 |
| BP | GO:0030177 | positive regulation of Wnt signaling pathway                    | 20/808 | 183/18866 | 0.000118 | 0.00357  | 0.003155 | 10413/748 | 20 |
| BP | GO:0006220 | pyrimidine nucleotide metabolic process                         | 9/808  | 46/18866  | 0.000123 | 0.003702 | 0.003271 | 54963/729 | 9  |
| BP | GO:0002220 | innate immune response activating cell surface receptors        | 15/808 | 116/18866 | 0.000129 | 0.003856 | 0.003407 | 10454/571 | 15 |
| BP | GO:0019884 | antigen processing and presentation of exogenous peptides       | 20/808 | 185/18866 | 0.000137 | 0.004071 | 0.003597 | 29127/571 | 20 |
| BP | GO:0051988 | regulation of attachment of spindle microtubules to kinetochore | 5/808  | 13/18866  | 0.000137 | 0.004074 | 0.0036   | 10615/291 | 5  |
| BP | GO:0002758 | innate immune response-activating signal transduction           | 15/808 | 117/18866 | 0.000142 | 0.004176 | 0.003691 | 10454/571 | 15 |
| BP | GO:0042180 | cellular ketone metabolic process                               | 25/808 | 260/18866 | 0.000143 | 0.004189 | 0.003701 | 23408/571 | 25 |
| BP | GO:0036293 | response to decreased oxygen levels                             | 32/808 | 371/18866 | 0.000144 | 0.004189 | 0.003701 | 7314/5710 | 32 |
| BP | GO:0030261 | chromosome condensation                                         | 9/808  | 47/18866  | 0.000146 | 0.004229 | 0.003737 | 7153/1104 | 9  |
| BP | GO:0002218 | activation of innate immune response                            | 17/808 | 144/18866 | 0.000147 | 0.004237 | 0.003744 | 10454/552 | 17 |
| BP | GO:0062012 | regulation of small molecule metabolic process                  | 37/808 | 456/18866 | 0.000158 | 0.004511 | 0.003986 | 57103/677 | 37 |
| BP | GO:0015980 | energy derivation by oxidation of organic compounds             | 26/808 | 278/18866 | 0.000167 | 0.004742 | 0.004191 | 57103/647 | 26 |
| BP | GO:0090224 | regulation of spindle organization                              | 8/808  | 38/18866  | 0.00017  | 0.004824 | 0.004263 | 22974/104 | 8  |
| BP | GO:0001666 | response to hypoxia                                             | 31/808 | 359/18866 | 0.000178 | 0.005011 | 0.004428 | 7314/5710 | 31 |
| BP | GO:0043486 | histone exchange                                                | 10/808 | 59/18866  | 0.000184 | 0.00514  | 0.004542 | 6944/5931 | 10 |
| BP | GO:0000723 | telomere maintenance                                            | 18/808 | 161/18866 | 0.000191 | 0.005277 | 0.004663 | 5976/5518 | 18 |
| BP | GO:0031570 | DNA integrity checkpoint                                        | 18/808 | 161/18866 | 0.000191 | 0.005277 | 0.004663 | 79968/514 | 18 |
| BP | GO:0097711 | ciliary basal body-plasma membrane docking                      | 13/808 | 95/18866  | 0.000201 | 0.005542 | 0.004897 | 10733/534 | 13 |
| BP | GO:0031936 | negative regulation of chromatin silencing                      | 5/808  | 14/18866  | 0.000206 | 0.005649 | 0.004992 | 3010/3009 | 5  |
| BP | GO:0070482 | response to oxygen levels                                       | 33/808 | 396/18866 | 0.000216 | 0.005892 | 0.005206 | 7314/5710 | 33 |
| BP | GO:0000132 | establishment of mitotic spindle orientation                    | 7/808  | 30/18866  | 0.000221 | 0.005986 | 0.00529  | 54908/534 | 7  |
| BP | GO:0006303 | double-strand break repair via nonhomologous recombination      | 13/808 | 96/18866  | 0.000224 | 0.006032 | 0.00533  | 7336/7341 | 13 |
| BP | GO:0042176 | regulation of protein catabolic process                         | 33/808 | 397/18866 | 0.000226 | 0.006072 | 0.005365 | 11060/748 | 33 |

|    |            |                                               |        |           |          |          |          |           |    |
|----|------------|-----------------------------------------------|--------|-----------|----------|----------|----------|-----------|----|
| BP | GO:0051653 | spindle localization                          | 9/808  | 50/18866  | 0.000239 | 0.006383 | 0.00564  | 54908/534 | 9  |
| BP | GO:0042775 | mitochondrial ATP synthesis coupled electr    | 13/808 | 97/18866  | 0.000248 | 0.006591 | 0.005825 | 6389/4726 | 13 |
| BP | GO:0071459 | protein localization to chromosome, centro    | 6/808  | 22/18866  | 0.000251 | 0.006613 | 0.005843 | 54908/104 | 6  |
| BP | GO:0048002 | antigen processing and presentation of pep    | 20/808 | 194/18866 | 0.000259 | 0.006801 | 0.00601  | 29127/571 | 20 |
| BP | GO:0034502 | protein localization to chromosome            | 12/808 | 85/18866  | 0.000261 | 0.006806 | 0.006014 | 54908/588 | 12 |
| BP | GO:1901796 | regulation of signal transduction by p53 cla  | 19/808 | 180/18866 | 0.000271 | 0.006977 | 0.006165 | 7314/5149 | 19 |
| BP | GO:0001736 | establishment of planar polarity              | 15/808 | 124/18866 | 0.000271 | 0.006977 | 0.006165 | 5713/5708 | 15 |
| BP | GO:0007164 | establishment of tissue polarity              | 15/808 | 124/18866 | 0.000271 | 0.006977 | 0.006165 | 5713/5708 | 15 |
| BP | GO:0006221 | pyrimidine nucleotide biosynthetic process    | 7/808  | 31/18866  | 0.000275 | 0.006977 | 0.006165 | 54963/729 | 7  |
| BP | GO:0007143 | female meiotic nuclear division               | 7/808  | 31/18866  | 0.000275 | 0.006977 | 0.006165 | 7314/9319 | 7  |
| BP | GO:0042773 | ATP synthesis coupled electron transport      | 13/808 | 98/18866  | 0.000275 | 0.006977 | 0.006165 | 6389/4726 | 13 |
| BP | GO:0031349 | positive regulation of defense response       | 32/808 | 385/18866 | 0.000281 | 0.007071 | 0.006249 | 3093/8717 | 32 |
| BP | GO:0072395 | signal transduction involved in cell cycle ch | 11/808 | 74/18866  | 0.000295 | 0.007378 | 0.00652  | 51499/665 | 11 |
| BP | GO:0007098 | centrosome cycle                              | 15/808 | 125/18866 | 0.000296 | 0.007378 | 0.00652  | 7516/6491 | 15 |
| BP | GO:0072528 | pyrimidine-containing compound biosynth       | 8/808  | 41/18866  | 0.000297 | 0.007378 | 0.00652  | 54963/729 | 8  |
| BP | GO:0002474 | antigen processing and presentation of pep    | 13/808 | 99/18866  | 0.000305 | 0.007533 | 0.006657 | 5713/5708 | 13 |
| BP | GO:0006913 | nucleocytoplasmic transport                   | 30/808 | 354/18866 | 0.00031  | 0.007622 | 0.006736 | 5976/7307 | 30 |
| BP | GO:0009147 | pyrimidine nucleoside triphosphate metabo     | 6/808  | 23/18866  | 0.000327 | 0.007997 | 0.007066 | 54963/729 | 6  |
| BP | GO:0060968 | regulation of gene silencing                  | 16/808 | 140/18866 | 0.000331 | 0.008065 | 0.007126 | 6774/8480 | 16 |
| BP | GO:0051169 | nuclear transport                             | 30/808 | 357/18866 | 0.000358 | 0.008664 | 0.007656 | 5976/7307 | 30 |
| BP | GO:0002066 | columnar/cuboidal epithelial cell developm    | 10/808 | 64/18866  | 0.000365 | 0.008802 | 0.007778 | 286451/10 | 10 |
| BP | GO:0051984 | positive regulation of chromosome segrega     | 7/808  | 33/18866  | 0.000415 | 0.009912 | 0.008759 | 5885/9555 | 7  |
| BP | GO:0090307 | mitotic spindle assembly                      | 10/808 | 65/18866  | 0.000415 | 0.009912 | 0.008759 | 22974/291 | 10 |
| BP | GO:0046034 | ATP metabolic process                         | 27/808 | 311/18866 | 0.000418 | 0.009912 | 0.008759 | 57103/677 | 27 |
| BP | GO:0060576 | intestinal epithelial cell development        | 5/808  | 16/18866  | 0.000419 | 0.009912 | 0.008759 | 286451/10 | 5  |
| BP | GO:0045333 | cellular respiration                          | 19/808 | 187/18866 | 0.000439 | 0.010308 | 0.009109 | 6472/6389 | 19 |
| BP | GO:0022904 | respiratory electron transport chain          | 14/808 | 116/18866 | 0.00044  | 0.010308 | 0.009109 | 6389/4726 | 14 |
| BP | GO:0009266 | response to temperature stimulus              | 22/808 | 233/18866 | 0.000452 | 0.010535 | 0.00931  | 7341/6647 | 22 |
| BP | GO:0001738 | morphogenesis of a polarized epithelium       | 16/808 | 145/18866 | 0.000492 | 0.011379 | 0.010055 | 23513/571 | 16 |
| BP | GO:0009124 | nucleoside monophosphate biosynthetic pi      | 8/808  | 44/18866  | 0.000492 | 0.011379 | 0.010055 | 54963/729 | 8  |
| BP | GO:0000726 | non-recombinational repair                    | 13/808 | 104/18866 | 0.000496 | 0.011408 | 0.010081 | 7336/7341 | 13 |
| BP | GO:0006367 | transcription initiation from RNA polymera    | 19/808 | 189/18866 | 0.000501 | 0.011469 | 0.010135 | 10413/748 | 19 |
| BP | GO:0060236 | regulation of mitotic spindle organization    | 7/808  | 34/18866  | 0.000503 | 0.011469 | 0.010135 | 22974/104 | 7  |
| BP | GO:0050000 | chromosome localization                       | 11/808 | 79/18866  | 0.000525 | 0.011872 | 0.010491 | 54908/106 | 11 |
| BP | GO:0051303 | establishment of chromosome localization      | 11/808 | 79/18866  | 0.000525 | 0.011872 | 0.010491 | 54908/106 | 11 |
| BP | GO:0008334 | histone mRNA metabolic process                | 6/808  | 25/18866  | 0.000533 | 0.011991 | 0.010596 | 5976/1104 | 6  |
| BP | GO:0050852 | T cell receptor signaling pathway             | 20/808 | 206/18866 | 0.000566 | 0.012679 | 0.011204 | 8767/5713 | 20 |
| BP | GO:0035999 | tetrahydrofolate interconversion              | 4/808  | 10/18866  | 0.00057  | 0.012715 | 0.011235 | 7298/6472 | 4  |

|    |            |                                                         |        |           |          |          |          |           |    |
|----|------------|---------------------------------------------------------|--------|-----------|----------|----------|----------|-----------|----|
| BP | GO:0000083 | regulation of transcription involved in G1/S            | 7/808  | 35/18866  | 0.000606 | 0.013389 | 0.011831 | 7298/6241 | 7  |
| BP | GO:0009262 | deoxyribonucleotide metabolic process                   | 7/808  | 35/18866  | 0.000606 | 0.013389 | 0.011831 | 7298/6241 | 7  |
| BP | GO:0006304 | DNA modification                                        | 14/808 | 120/18866 | 0.000621 | 0.013674 | 0.012084 | 8493/4913 | 14 |
| BP | GO:0006119 | oxidative phosphorylation                               | 16/808 | 149/18866 | 0.000665 | 0.014563 | 0.012868 | 6472/6389 | 16 |
| BP | GO:0002065 | columnar/cuboidal epithelial cell differentiation       | 14/808 | 121/18866 | 0.000676 | 0.014739 | 0.013025 | 286451/10 | 14 |
| BP | GO:0032508 | DNA duplex unwinding                                    | 13/808 | 108/18866 | 0.000714 | 0.015502 | 0.013698 | 7314/7153 | 13 |
| BP | GO:0051294 | establishment of spindle orientation                    | 7/808  | 36/18866  | 0.000724 | 0.01567  | 0.013847 | 54908/534 | 7  |
| BP | GO:0031023 | microtubule organizing center organization              | 15/808 | 136/18866 | 0.000732 | 0.015775 | 0.01394  | 7516/6491 | 15 |
| BP | GO:2001020 | regulation of response to DNA damage stimulus           | 21/808 | 226/18866 | 0.000742 | 0.015921 | 0.014069 | 79968/551 | 21 |
| BP | GO:0000209 | protein polyubiquitination                              | 28/808 | 340/18866 | 0.00076  | 0.016223 | 0.014336 | 11060/733 | 28 |
| BP | GO:0034501 | protein localization to kinetochore                     | 5/808  | 18/18866  | 0.000765 | 0.016243 | 0.014354 | 54908/104 | 5  |
| BP | GO:0045088 | regulation of innate immune response                    | 26/808 | 307/18866 | 0.000767 | 0.016243 | 0.014354 | 3093/1045 | 26 |
| BP | GO:1905330 | regulation of morphogenesis of an epithelium            | 18/808 | 181/18866 | 0.000792 | 0.016692 | 0.01475  | 5713/5708 | 18 |
| BP | GO:0045815 | positive regulation of gene expression, epigenetic      | 9/808  | 59/18866  | 0.000852 | 0.017835 | 0.01576  | 5437/5435 | 9  |
| BP | GO:0000724 | double-strand break repair via homologous recombination | 15/808 | 138/18866 | 0.000853 | 0.017835 | 0.01576  | 7516/5518 | 15 |
| BP | GO:0060969 | negative regulation of gene silencing                   | 7/808  | 37/18866  | 0.000861 | 0.017928 | 0.015843 | 6774/3010 | 7  |
| BP | GO:0051574 | positive regulation of histone H3-K9 methylation        | 4/808  | 11/18866  | 0.000866 | 0.017954 | 0.015865 | 55183/593 | 4  |
| BP | GO:0038095 | Fc-epsilon receptor signaling pathway                   | 17/808 | 169/18866 | 0.000963 | 0.01984  | 0.017532 | 10454/571 | 17 |
| BP | GO:0033260 | nuclear DNA replication                                 | 9/808  | 60/18866  | 0.000964 | 0.01984  | 0.017532 | 58525/597 | 9  |
| BP | GO:0072527 | pyrimidine-containing compound metabolic process        | 11/808 | 85/18866  | 0.000983 | 0.02012  | 0.01778  | 54963/729 | 11 |
| BP | GO:0000725 | recombinational repair                                  | 15/808 | 140/18866 | 0.00099  | 0.02012  | 0.01778  | 7516/5518 | 15 |
| BP | GO:0009148 | pyrimidine nucleoside triphosphate biosynthesis         | 5/808  | 19/18866  | 0.001002 | 0.02012  | 0.01778  | 54963/729 | 5  |
| BP | GO:0031935 | regulation of chromatin silencing                       | 5/808  | 19/18866  | 0.001002 | 0.02012  | 0.01778  | 3010/3009 | 5  |
| BP | GO:0033189 | response to vitamin A                                   | 5/808  | 19/18866  | 0.001002 | 0.02012  | 0.01778  | 7298/5914 | 5  |
| BP | GO:0046653 | tetrahydrofolate metabolic process                      | 5/808  | 19/18866  | 0.001002 | 0.02012  | 0.01778  | 7298/6472 | 5  |
| BP | GO:0006760 | folic acid-containing compound metabolic process        | 6/808  | 28/18866  | 0.001016 | 0.020175 | 0.017828 | 7298/6573 | 6  |
| BP | GO:0071168 | protein localization to chromatin                       | 6/808  | 28/18866  | 0.001016 | 0.020175 | 0.017828 | 5885/5347 | 6  |
| BP | GO:0051567 | histone H3-K9 methylation                               | 7/808  | 38/18866  | 0.001017 | 0.020175 | 0.017828 | 79723/551 | 7  |
| BP | GO:0019882 | antigen processing and presentation                     | 21/808 | 232/18866 | 0.001039 | 0.02053  | 0.018141 | 54915/291 | 21 |
| BP | GO:0072401 | signal transduction involved in DNA integration         | 10/808 | 73/18866  | 0.001059 | 0.020777 | 0.01836  | 51499/665 | 10 |
| BP | GO:0072422 | signal transduction involved in DNA damage response     | 10/808 | 73/18866  | 0.001059 | 0.020777 | 0.01836  | 51499/665 | 10 |
| BP | GO:0008380 | RNA splicing                                            | 36/808 | 487/18866 | 0.001082 | 0.021137 | 0.018678 | 59286/730 | 36 |
| BP | GO:0051310 | metaphase plate congression                             | 9/808  | 61/18866  | 0.001089 | 0.021195 | 0.018729 | 54908/106 | 9  |
| BP | GO:0140056 | organelle localization by membrane tethering            | 17/808 | 171/18866 | 0.001098 | 0.021277 | 0.018802 | 9217/6809 | 17 |
| BP | GO:0007006 | mitochondrial membrane organization                     | 15/808 | 142/18866 | 0.001144 | 0.0221   | 0.019529 | 28978/883 | 15 |
| BP | GO:0006305 | DNA alkylation                                          | 10/808 | 74/18866  | 0.001179 | 0.022593 | 0.019964 | 8493/4609 | 10 |
| BP | GO:0006306 | DNA methylation                                         | 10/808 | 74/18866  | 0.001179 | 0.022593 | 0.019964 | 8493/4609 | 10 |
| BP | GO:0009162 | deoxyribonucleoside monophosphate metabolism            | 4/808  | 12/18866  | 0.001255 | 0.023772 | 0.021007 | 7298/7083 | 4  |

|    |            |                                                 |        |           |          |          |          |           |    |
|----|------------|-------------------------------------------------|--------|-----------|----------|----------|----------|-----------|----|
| BP | GO:0021702 | cerebellar Purkinje cell differentiation        | 4/808  | 12/18866  | 0.001255 | 0.023772 | 0.021007 | 91137/397 | 4  |
| BP | GO:0071044 | histone mRNA catabolic process                  | 4/808  | 12/18866  | 0.001255 | 0.023772 | 0.021007 | 5976/1104 | 4  |
| BP | GO:0046655 | folic acid metabolic process                    | 5/808  | 20/18866  | 0.001289 | 0.024338 | 0.021507 | 6573/6472 | 5  |
| BP | GO:0010212 | response to ionizing radiation                  | 15/808 | 144/18866 | 0.001319 | 0.02481  | 0.021924 | 10413/751 | 15 |
| BP | GO:1901293 | nucleoside phosphate biosynthetic process       | 23/808 | 269/18866 | 0.001327 | 0.024868 | 0.021975 | 54963/729 | 23 |
| BP | GO:2000058 | regulation of ubiquitin-dependent protein       | 16/808 | 159/18866 | 0.001336 | 0.024945 | 0.022043 | 7480/9097 | 16 |
| BP | GO:0032259 | methylation                                     | 29/808 | 371/18866 | 0.001391 | 0.025849 | 0.022842 | 7552/7298 | 29 |
| BP | GO:0034968 | histone lysine methylation                      | 13/808 | 116/18866 | 0.001395 | 0.025849 | 0.022842 | 7552/7972 | 13 |
| BP | GO:1903829 | positive regulation of cellular protein localiz | 27/808 | 338/18866 | 0.001465 | 0.027039 | 0.023894 | 7429/5928 | 27 |
| BP | GO:1902751 | positive regulation of cell cycle G2/M phase    | 6/808  | 30/18866  | 0.001489 | 0.027191 | 0.024028 | 7480/4204 | 6  |
| BP | GO:0000377 | RNA splicing, via transesterification reaction  | 30/808 | 390/18866 | 0.001489 | 0.027191 | 0.024028 | 59286/730 | 30 |
| BP | GO:0000398 | mRNA splicing, via spliceosome                  | 30/808 | 390/18866 | 0.001489 | 0.027191 | 0.024028 | 59286/730 | 30 |
| BP | GO:0007007 | inner mitochondrial membrane organizatio        | 8/808  | 52/18866  | 0.001546 | 0.028135 | 0.024862 | 8834/2651 | 8  |
| BP | GO:0043624 | cellular protein complex disassembly            | 20/808 | 224/18866 | 0.001595 | 0.02892  | 0.025555 | 7429/5976 | 20 |
| BP | GO:0000375 | RNA splicing, via transesterification reaction  | 30/808 | 393/18866 | 0.001675 | 0.030259 | 0.026739 | 59286/730 | 30 |
| BP | GO:0045732 | positive regulation of protein catabolic pro    | 20/808 | 225/18866 | 0.001682 | 0.030284 | 0.026761 | 11060/557 | 20 |
| BP | GO:0045682 | regulation of epidermis development             | 11/808 | 91/18866  | 0.00173  | 0.031036 | 0.027425 | 7480/8717 | 11 |
| BP | GO:0021694 | cerebellar Purkinje cell layer formation        | 4/808  | 13/18866  | 0.001751 | 0.031187 | 0.027559 | 91137/397 | 4  |
| BP | GO:0043247 | telomere maintenance in response to DNA         | 4/808  | 13/18866  | 0.001751 | 0.031187 | 0.027559 | 55183/207 | 4  |
| BP | GO:0009394 | 2'-deoxyribonucleotide metabolic process        | 6/808  | 31/18866  | 0.00178  | 0.03159  | 0.027915 | 7298/4521 | 6  |
| BP | GO:1902275 | regulation of chromatin organization            | 18/808 | 195/18866 | 0.001852 | 0.032751 | 0.028941 | 55100/807 | 18 |
| BP | GO:1903362 | regulation of cellular protein catabolic prod   | 22/808 | 260/18866 | 0.001906 | 0.033593 | 0.029685 | 7480/5573 | 22 |
| BP | GO:0022406 | membrane docking                                | 17/808 | 180/18866 | 0.001918 | 0.033648 | 0.029734 | 9217/6809 | 17 |
| BP | GO:0046824 | positive regulation of nucleocytoplasmic tra    | 9/808  | 66/18866  | 0.001923 | 0.033648 | 0.029734 | 10204/229 | 9  |
| BP | GO:0051656 | establishment of organelle localization         | 32/808 | 432/18866 | 0.001933 | 0.033719 | 0.029796 | 7314/8369 | 32 |
| BP | GO:0090501 | RNA phosphodiester bond hydrolysis              | 16/808 | 165/18866 | 0.001965 | 0.034145 | 0.030173 | 7247/7904 | 16 |
| BP | GO:0051383 | kinetochore organization                        | 5/808  | 22/18866  | 0.00204  | 0.035208 | 0.031112 | 10403/978 | 5  |
| BP | GO:0062033 | positive regulation of mitotic sister chroma    | 5/808  | 22/18866  | 0.00204  | 0.035208 | 0.031112 | 9555/9700 | 5  |
| BP | GO:0060828 | regulation of canonical Wnt signaling pathw     | 24/808 | 295/18866 | 0.002059 | 0.035378 | 0.031262 | 10413/748 | 24 |
| BP | GO:0045132 | meiotic chromosome segregation                  | 11/808 | 93/18866  | 0.002064 | 0.035378 | 0.031262 | 9319/7153 | 11 |
| BP | GO:0030330 | DNA damage response, signal transduction        | 12/808 | 107/18866 | 0.002087 | 0.035591 | 0.03145  | 9100/5149 | 12 |
| BP | GO:0009408 | response to heat                                | 16/808 | 166/18866 | 0.00209  | 0.035591 | 0.03145  | 7341/6647 | 16 |
| BP | GO:0032984 | protein-containing complex disassembly          | 26/808 | 330/18866 | 0.002151 | 0.036373 | 0.032142 | 7429/5976 | 26 |
| BP | GO:0031647 | regulation of protein stability                 | 24/808 | 296/18866 | 0.002153 | 0.036373 | 0.032142 | 7480/5852 | 24 |
| BP | GO:2001252 | positive regulation of chromosome organiz       | 17/808 | 182/18866 | 0.002158 | 0.036373 | 0.032142 | 55183/588 | 17 |
| BP | GO:0036297 | interstrand cross-link repair                   | 8/808  | 55/18866  | 0.002236 | 0.037557 | 0.033188 | 7314/1063 | 8  |
| BP | GO:0044774 | mitotic DNA integrity checkpoint                | 12/808 | 108/18866 | 0.002259 | 0.037819 | 0.03342  | 51499/715 | 12 |
| BP | GO:0006241 | CTP biosynthetic process                        | 4/808  | 14/18866  | 0.002369 | 0.039278 | 0.034709 | 54963/102 | 4  |

|    |            |                                                       |        |           |          |          |          |           |    |
|----|------------|-------------------------------------------------------|--------|-----------|----------|----------|----------|-----------|----|
| BP | GO:0007100 | mitotic centrosome separation                         | 4/808  | 14/18866  | 0.002369 | 0.039278 | 0.034709 | 5902/4751 | 4  |
| BP | GO:0046036 | CTP metabolic process                                 | 4/808  | 14/18866  | 0.002369 | 0.039278 | 0.034709 | 54963/102 | 4  |
| BP | GO:0031123 | RNA 3'-end processing                                 | 15/808 | 153/18866 | 0.002408 | 0.039631 | 0.035021 | 7307/1104 | 15 |
| BP | GO:0006611 | protein export from nucleus                           | 17/808 | 184/18866 | 0.002422 | 0.039631 | 0.035021 | 5976/7307 | 17 |
| BP | GO:0022900 | electron transport chain                              | 17/808 | 184/18866 | 0.002422 | 0.039631 | 0.035021 | 6389/4726 | 17 |
| BP | GO:0090090 | negative regulation of canonical Wnt signal           | 17/808 | 184/18866 | 0.002422 | 0.039631 | 0.035021 | 6657/5713 | 17 |
| BP | GO:0051054 | positive regulation of DNA metabolic process          | 18/808 | 200/18866 | 0.002447 | 0.039907 | 0.035265 | 7552/5710 | 18 |
| BP | GO:0045684 | positive regulation of epidermis development          | 7/808  | 44/18866  | 0.002472 | 0.04019  | 0.035514 | 7480/8717 | 7  |
| BP | GO:0006352 | DNA-templated transcription, initiation               | 21/808 | 249/18866 | 0.002484 | 0.040223 | 0.035544 | 10413/748 | 21 |
| BP | GO:0019692 | deoxyribose phosphate metabolic process               | 6/808  | 33/18866  | 0.00249  | 0.040223 | 0.035544 | 7298/4521 | 6  |
| BP | GO:0051570 | regulation of histone H3-K9 methylation               | 5/808  | 23/18866  | 0.002516 | 0.040508 | 0.035795 | 55183/593 | 5  |
| BP | GO:0009165 | nucleotide biosynthetic process                       | 22/808 | 266/18866 | 0.002531 | 0.040624 | 0.035898 | 54963/729 | 22 |
| BP | GO:1901989 | positive regulation of cell cycle phase transition    | 12/808 | 110/18866 | 0.002637 | 0.042186 | 0.037278 | 7480/1106 | 12 |
| BP | GO:0043414 | macromolecule methylation                             | 25/808 | 318/18866 | 0.002666 | 0.042525 | 0.037578 | 7552/9676 | 25 |
| BP | GO:0034605 | cellular response to heat                             | 13/808 | 125/18866 | 0.002734 | 0.043472 | 0.038415 | 7341/5931 | 13 |
| BP | GO:0072431 | signal transduction involved in mitotic G1 phase      | 8/808  | 57/18866  | 0.002815 | 0.044434 | 0.039264 | 51499/665 | 8  |
| BP | GO:1902400 | intracellular signal transduction involved in mitosis | 8/808  | 57/18866  | 0.002815 | 0.044434 | 0.039264 | 51499/665 | 8  |
| BP | GO:0051204 | protein insertion into mitochondrial membrane         | 7/808  | 45/18866  | 0.002821 | 0.044434 | 0.039264 | 26517/265 | 7  |
| BP | GO:0050821 | protein stabilization                                 | 17/808 | 187/18866 | 0.002868 | 0.045032 | 0.039794 | 7480/5852 | 17 |
| BP | GO:0042558 | pteridine-containing compound metabolic process       | 6/808  | 34/18866  | 0.002916 | 0.045639 | 0.04033  | 7298/6573 | 6  |
| BP | GO:0051168 | nuclear export                                        | 18/808 | 204/18866 | 0.003031 | 0.04729  | 0.041789 | 5976/7307 | 18 |
| BP | GO:0051004 | regulation of lipoprotein lipase activity             | 5/808  | 24/18866  | 0.003067 | 0.047564 | 0.04203  | 4023/345/ | 5  |
| BP | GO:1904666 | regulation of ubiquitin protein ligase activity       | 5/808  | 24/18866  | 0.003067 | 0.047564 | 0.04203  | 11065/534 | 5  |
| BP | GO:0009209 | pyrimidine ribonucleoside triphosphate biosynthesis   | 4/808  | 15/18866  | 0.003122 | 0.047938 | 0.042361 | 54963/102 | 4  |
| BP | GO:0051299 | centrosome separation                                 | 4/808  | 15/18866  | 0.003122 | 0.047938 | 0.042361 | 5902/4751 | 4  |
| BP | GO:0051315 | attachment of mitotic spindle microtubules            | 4/808  | 15/18866  | 0.003122 | 0.047938 | 0.042361 | 10403/106 | 4  |
| BP | GO:0044728 | DNA methylation or demethylation                      | 11/808 | 98/18866  | 0.003129 | 0.047938 | 0.042361 | 8493/4609 | 11 |
| CC | GO:0098687 | chromosomal region                                    | 56/829 | 350/19559 | 6.75E-18 | 3.91E-15 | 3.22E-15 | 11130/597 | 56 |
| CC | GO:0000775 | chromosome, centromeric region                        | 38/829 | 196/19559 | 2.67E-15 | 7.73E-13 | 6.37E-13 | 11130/797 | 38 |
| CC | GO:0005819 | spindle                                               | 52/829 | 367/19559 | 1.82E-14 | 3.14E-12 | 2.58E-12 | 55689/229 | 52 |
| CC | GO:0000779 | condensed chromosome, centromeric region              | 29/829 | 122/19559 | 2.17E-14 | 3.14E-12 | 2.58E-12 | 11130/549 | 29 |
| CC | GO:0000793 | condensed chromosome                                  | 37/829 | 222/19559 | 8.31E-13 | 9.62E-11 | 7.92E-11 | 11130/715 | 37 |
| CC | GO:0000777 | condensed chromosome kinetochore                      | 25/829 | 106/19559 | 1.64E-12 | 1.58E-10 | 1.30E-10 | 11130/549 | 25 |
| CC | GO:0000776 | kinetochore                                           | 28/829 | 137/19559 | 3.27E-12 | 2.70E-10 | 2.23E-10 | 11130/549 | 28 |
| CC | GO:0072686 | mitotic spindle                                       | 24/829 | 133/19559 | 1.68E-09 | 1.22E-07 | 1.00E-07 | 55689/229 | 24 |
| CC | GO:0000922 | spindle pole                                          | 25/829 | 165/19559 | 3.10E-08 | 1.99E-06 | 1.64E-06 | 22974/104 | 25 |
| CC | GO:0000502 | proteasome complex                                    | 15/829 | 63/19559  | 4.11E-08 | 2.38E-06 | 1.96E-06 | 9097/5137 | 15 |
| CC | GO:1905369 | endopeptidase complex                                 | 15/829 | 69/19559  | 1.51E-07 | 7.92E-06 | 6.53E-06 | 9097/5137 | 15 |



|    |            |                                          |        |           |          |          |          |           |    |
|----|------------|------------------------------------------|--------|-----------|----------|----------|----------|-----------|----|
| CC | GO:0051233 | spindle midzone                          | 11/829 | 36/19559  | 1.69E-07 | 8.14E-06 | 6.70E-06 | 55183/291 | 11 |
| CC | GO:1905368 | peptidase complex                        | 16/829 | 92/19559  | 1.45E-06 | 6.45E-05 | 5.31E-05 | 9097/5137 | 16 |
| CC | GO:0000792 | heterochromatin                          | 14/829 | 78/19559  | 4.44E-06 | 0.000184 | 0.000151 | 79968/734 | 14 |
| CC | GO:0000780 | condensed nuclear chromosome, centromere | 9/829  | 32/19559  | 4.92E-06 | 0.00019  | 0.000156 | 5885/5347 | 9  |
| CC | GO:0031970 | organelle envelope lumen                 | 15/829 | 90/19559  | 5.31E-06 | 0.000192 | 0.000158 | 51499/167 | 15 |
| CC | GO:0005758 | mitochondrial intermembrane space        | 14/829 | 80/19559  | 6.04E-06 | 0.000206 | 0.00017  | 51499/167 | 14 |
| CC | GO:0005839 | proteasome core complex                  | 7/829  | 20/19559  | 1.14E-05 | 0.000368 | 0.000303 | 5695/5691 | 7  |
| CC | GO:0005743 | mitochondrial inner membrane             | 42/829 | 489/19559 | 1.22E-05 | 0.000371 | 0.000305 | 7298/1045 | 42 |
| CC | GO:0005876 | spindle microtubule                      | 12/829 | 66/19559  | 1.85E-05 | 0.000537 | 0.000442 | 220134/90 | 12 |
| CC | GO:0000781 | chromosome, telomeric region             | 20/829 | 164/19559 | 2.14E-05 | 0.00059  | 0.000486 | 5976/6741 | 20 |
| CC | GO:0098798 | mitochondrial protein complex            | 27/829 | 265/19559 | 2.43E-05 | 0.000639 | 0.000526 | 10452/265 | 27 |
| CC | GO:0030496 | midbody                                  | 21/829 | 182/19559 | 3.12E-05 | 0.000785 | 0.000646 | 58525/981 | 21 |
| CC | GO:1902555 | endoribonuclease complex                 | 8/829  | 31/19559  | 3.33E-05 | 0.000804 | 0.000662 | 79042/107 | 8  |
| CC | GO:0005874 | microtubule                              | 37/829 | 431/19559 | 4.01E-05 | 0.000929 | 0.000765 | 80086/229 | 37 |
| CC | GO:0000778 | condensed nuclear chromosome kinetochore | 6/829  | 17/19559  | 4.71E-05 | 0.00105  | 0.000865 | 5347/1040 | 6  |
| CC | GO:0000784 | nuclear chromosome, telomeric region     | 16/829 | 124/19559 | 7.06E-05 | 0.001513 | 0.001246 | 5976/6741 | 16 |
| CC | GO:0005759 | mitochondrial matrix                     | 38/829 | 473/19559 | 0.000129 | 0.002598 | 0.002139 | 7298/5480 | 38 |
| CC | GO:1905348 | endonuclease complex                     | 8/829  | 37/19559  | 0.00013  | 0.002598 | 0.002139 | 79042/107 | 8  |
| CC | GO:0005838 | proteasome regulatory particle           | 6/829  | 21/19559  | 0.000179 | 0.003449 | 0.002841 | 5713/5708 | 6  |
| CC | GO:0000940 | condensed chromosome outer kinetochore   | 5/829  | 14/19559  | 0.000196 | 0.003555 | 0.002928 | 54908/220 | 5  |
| CC | GO:1990023 | mitotic spindle midzone                  | 5/829  | 14/19559  | 0.000196 | 0.003555 | 0.002928 | 9055/1469 | 5  |
| CC | GO:0101002 | ficolin-1-rich granule                   | 15/829 | 124/19559 | 0.000243 | 0.004143 | 0.003412 | 5713/5708 | 15 |
| CC | GO:1904813 | ficolin-1-rich granule lumen             | 15/829 | 124/19559 | 0.000243 | 0.004143 | 0.003412 | 5713/5708 | 15 |
| CC | GO:0031616 | spindle pole centrosome                  | 5/829  | 15/19559  | 0.000284 | 0.004706 | 0.003876 | 10101/201 | 5  |
| CC | GO:0044391 | ribosomal subunit                        | 19/829 | 187/19559 | 0.000387 | 0.005781 | 0.004761 | 6227/6205 | 19 |
| CC | GO:0044815 | DNA packaging complex                    | 14/829 | 116/19559 | 0.000397 | 0.005781 | 0.004761 | 23397/641 | 14 |
| CC | GO:0022624 | proteasome accessory complex             | 6/829  | 24/19559  | 0.000398 | 0.005781 | 0.004761 | 5713/5708 | 6  |
| CC | GO:0045120 | pronucleus                               | 5/829  | 16/19559  | 0.000399 | 0.005781 | 0.004761 | 55183/319 | 5  |
| CC | GO:0032154 | cleavage furrow                          | 9/829  | 54/19559  | 0.000405 | 0.005781 | 0.004761 | 10617/589 | 9  |
| CC | GO:0000794 | condensed nuclear chromosome             | 13/829 | 103/19559 | 0.000409 | 0.005781 | 0.004761 | 5885/5810 | 13 |
| CC | GO:0005635 | nuclear envelope                         | 36/829 | 473/19559 | 0.000535 | 0.007371 | 0.00607  | 7444/2319 | 36 |
| CC | GO:0032153 | cell division site                       | 10/829 | 72/19559  | 0.000879 | 0.01183  | 0.009742 | 10617/108 | 10 |
| CC | GO:0098803 | respiratory chain complex                | 11/829 | 85/19559  | 0.000904 | 0.011902 | 0.009802 | 6389/4726 | 11 |
| CC | GO:0016607 | nuclear speck                            | 31/829 | 401/19559 | 0.000985 | 0.012668 | 0.010433 | 6944/5589 | 31 |
| CC | GO:0005721 | pericentric heterochromatin              | 5/829  | 20/19559  | 0.001231 | 0.015496 | 0.012762 | 9555/3070 | 5  |
| CC | GO:0000786 | nucleosome                               | 12/829 | 108/19559 | 0.002075 | 0.02556  | 0.021051 | 55506/955 | 12 |
| CC | GO:0005720 | nuclear heterochromatin                  | 6/829  | 34/19559  | 0.002769 | 0.033407 | 0.027512 | 9555/3015 | 6  |
| CC | GO:0005686 | U2 snRNP                                 | 5/829  | 24/19559  | 0.002933 | 0.034655 | 0.02854  | 6637/6629 | 5  |

|    |            |                                                        |        |           |          |          |          |           |    |
|----|------------|--------------------------------------------------------|--------|-----------|----------|----------|----------|-----------|----|
| CC | GO:0005643 | nuclear pore                                           | 10/829 | 85/19559  | 0.003134 | 0.036287 | 0.029885 | 7341/5902 | 10 |
| CC | GO:0005681 | spliceosomal complex                                   | 17/829 | 192/19559 | 0.003395 | 0.03854  | 0.03174  | 5976/7307 | 17 |
| CC | GO:0070469 | respirasome                                            | 11/829 | 101/19559 | 0.003661 | 0.040767 | 0.033574 | 6389/4726 | 11 |
| CC | GO:0015934 | large ribosomal subunit                                | 12/829 | 116/19559 | 0.003768 | 0.041158 | 0.033896 | 6181/1168 | 12 |
| CC | GO:0005746 | mitochondrial respirasome                              | 10/829 | 89/19559  | 0.004379 | 0.046954 | 0.038669 | 6389/4726 | 10 |
| CC | GO:0005747 | mitochondrial respiratory chain complex I              | 7/829  | 50/19559  | 0.004884 | 0.049609 | 0.040856 | 4726/4713 | 7  |
| CC | GO:0030964 | NADH dehydrogenase complex                             | 7/829  | 50/19559  | 0.004884 | 0.049609 | 0.040856 | 4726/4713 | 7  |
| CC | GO:0045271 | respiratory chain complex I                            | 7/829  | 50/19559  | 0.004884 | 0.049609 | 0.040856 | 4726/4713 | 7  |
| MF | GO:0016887 | ATPase activity                                        | 45/821 | 423/18352 | 6.84E-08 | 5.88E-05 | 5.45E-05 | 7516/5976 | 45 |
| MF | GO:0031490 | chromatin DNA binding                                  | 16/821 | 106/18352 | 1.89E-05 | 0.006715 | 0.006222 | 6774/6605 | 16 |
| MF | GO:0004298 | threonine-type endopeptidase activity                  | 7/821  | 21/18352  | 2.34E-05 | 0.006715 | 0.006222 | 5695/5691 | 7  |
| MF | GO:0031492 | nucleosomal DNA binding                                | 9/821  | 40/18352  | 5.38E-05 | 0.011176 | 0.010356 | 6605/9555 | 9  |
| MF | GO:0140097 | catalytic activity, acting on DNA                      | 23/821 | 209/18352 | 6.50E-05 | 0.011176 | 0.010356 | 7153/5984 | 23 |
| MF | GO:0004386 | helicase activity                                      | 19/821 | 160/18352 | 0.0001   | 0.014376 | 0.01332  | 5976/5984 | 19 |
| MF | GO:0043138 | 3'-5' DNA helicase activity                            | 6/821  | 19/18352  | 0.000129 | 0.01589  | 0.014723 | 9401/4175 | 6  |
| MF | GO:0008094 | DNA-dependent ATPase activity                          | 14/821 | 108/18352 | 0.000324 | 0.034231 | 0.031717 | 7516/7153 | 14 |
| MF | GO:0070003 | threonine-type peptidase activity                      | 7/821  | 31/18352  | 0.000358 | 0.034231 | 0.031717 | 5695/5691 | 7  |
| MF | GO:0003688 | DNA replication origin binding                         | 6/821  | 23/18352  | 0.000413 | 0.0355   | 0.032893 | 4998/4175 | 6  |
| MF | GO:0004518 | nuclease activity                                      | 21/821 | 210/18352 | 0.000495 | 0.035753 | 0.033127 | 7247/7904 | 21 |
| MF | GO:0015631 | tubulin binding                                        | 31/821 | 365/18352 | 0.000499 | 0.035753 | 0.033127 | 9217/2297 | 31 |
| BP | GO:0001667 | ameboidal-type cell migration                          | 45/660 | 481/18866 | 2.14E-09 | 1.07E-05 | 8.70E-06 | 7048/7040 | 45 |
| BP | GO:0030198 | extracellular matrix organization                      | 39/660 | 395/18866 | 5.86E-09 | 1.07E-05 | 8.70E-06 | 64856/717 | 39 |
| BP | GO:0043062 | extracellular structure organization                   | 39/660 | 396/18866 | 6.29E-09 | 1.07E-05 | 8.70E-06 | 64856/717 | 39 |
| BP | GO:0048015 | phosphatidylinositol-mediated signaling                | 25/660 | 192/18866 | 1.58E-08 | 2.02E-05 | 1.64E-05 | 7337/7249 | 25 |
| BP | GO:0040013 | negative regulation of locomotion                      | 38/660 | 397/18866 | 2.13E-08 | 2.05E-05 | 1.66E-05 | 54361/704 | 38 |
| BP | GO:0048017 | inositol lipid-mediated signaling                      | 25/660 | 196/18866 | 2.40E-08 | 2.05E-05 | 1.66E-05 | 7337/7249 | 25 |
| BP | GO:0061448 | connective tissue development                          | 29/660 | 262/18866 | 4.59E-08 | 3.32E-05 | 2.69E-05 | 9658/6935 | 29 |
| BP | GO:0060348 | bone development                                       | 25/660 | 204/18866 | 5.35E-08 | 3.32E-05 | 2.69E-05 | 7048/6424 | 25 |
| BP | GO:0014068 | positive regulation of phosphatidylinositol signaling  | 16/660 | 88/18866  | 5.84E-08 | 3.32E-05 | 2.69E-05 | 7337/7989 | 16 |
| BP | GO:0061041 | regulation of wound healing                            | 21/660 | 151/18866 | 7.06E-08 | 3.62E-05 | 2.93E-05 | 54361/709 | 21 |
| BP | GO:0051271 | negative regulation of cellular component organization | 37/660 | 400/18866 | 7.93E-08 | 3.69E-05 | 2.99E-05 | 54361/704 | 37 |
| BP | GO:0014066 | regulation of phosphatidylinositol 3-kinase activity   | 19/660 | 127/18866 | 9.09E-08 | 3.88E-05 | 3.14E-05 | 7337/7249 | 19 |
| BP | GO:0001649 | osteoblast differentiation                             | 26/660 | 231/18866 | 1.63E-07 | 6.14E-05 | 4.97E-05 | 23051/543 | 26 |
| BP | GO:0001503 | ossification                                           | 37/660 | 412/18866 | 1.68E-07 | 6.14E-05 | 4.97E-05 | 23051/543 | 37 |
| BP | GO:0007599 | hemostasis                                             | 33/660 | 348/18866 | 2.26E-07 | 7.73E-05 | 6.26E-05 | 7099/7035 | 33 |
| BP | GO:0010632 | regulation of epithelial cell migration                | 30/660 | 301/18866 | 2.77E-07 | 8.71E-05 | 7.06E-05 | 7048/7040 | 30 |
| BP | GO:0048771 | tissue remodeling                                      | 22/660 | 178/18866 | 2.89E-07 | 8.71E-05 | 7.06E-05 | 7040/1051 | 22 |
| BP | GO:0045669 | positive regulation of osteoblast differentiation      | 13/660 | 66/18866  | 3.87E-07 | 0.000109 | 8.85E-05 | 23051/543 | 13 |

|    |            |                                                  |        |           |          |          |          |           |    |
|----|------------|--------------------------------------------------|--------|-----------|----------|----------|----------|-----------|----|
| BP | GO:0060485 | mesenchyme development                           | 29/660 | 290/18866 | 4.08E-07 | 0.000109 | 8.85E-05 | 54361/101 | 29 |
| BP | GO:0014065 | phosphatidylinositol 3-kinase signaling          | 20/660 | 154/18866 | 4.48E-07 | 0.000109 | 8.85E-05 | 7337/7249 | 20 |
| BP | GO:0061045 | negative regulation of wound healing             | 14/660 | 78/18866  | 4.63E-07 | 0.000109 | 8.85E-05 | 54361/703 | 14 |
| BP | GO:1903034 | regulation of response to wounding               | 22/660 | 183/18866 | 4.69E-07 | 0.000109 | 8.85E-05 | 54361/709 | 22 |
| BP | GO:0007596 | blood coagulation                                | 32/660 | 343/18866 | 4.97E-07 | 0.000111 | 8.96E-05 | 7099/7035 | 32 |
| BP | GO:0090287 | regulation of cellular response to growth factor | 30/660 | 310/18866 | 5.21E-07 | 0.000111 | 9.02E-05 | 23090/693 | 30 |
| BP | GO:0003151 | outflow tract morphogenesis                      | 14/660 | 80/18866  | 6.40E-07 | 0.000128 | 0.000103 | 7048/1051 | 14 |
| BP | GO:0010631 | epithelial cell migration                        | 33/660 | 365/18866 | 6.73E-07 | 0.000128 | 0.000103 | 7048/7040 | 33 |
| BP | GO:2000146 | negative regulation of cell motility             | 33/660 | 365/18866 | 6.73E-07 | 0.000128 | 0.000103 | 54361/704 | 33 |
| BP | GO:0050817 | coagulation                                      | 32/660 | 349/18866 | 7.29E-07 | 0.000133 | 0.000108 | 7099/7035 | 32 |
| BP | GO:0090132 | epithelium migration                             | 33/660 | 368/18866 | 8.09E-07 | 0.000143 | 0.000116 | 7048/7040 | 33 |
| BP | GO:0045778 | positive regulation of ossification              | 15/660 | 94/18866  | 8.80E-07 | 0.000147 | 0.000119 | 23051/543 | 15 |
| BP | GO:0071560 | cellular response to transforming growth factor  | 26/660 | 252/18866 | 8.93E-07 | 0.000147 | 0.000119 | 7791/678/ | 26 |
| BP | GO:0090130 | tissue migration                                 | 33/660 | 374/18866 | 1.16E-06 | 0.000186 | 0.00015  | 7048/7040 | 33 |
| BP | GO:0071559 | response to transforming growth factor beta      | 26/660 | 258/18866 | 1.40E-06 | 0.000217 | 0.000175 | 7791/678/ | 26 |
| BP | GO:0051216 | cartilage development                            | 22/660 | 197/18866 | 1.65E-06 | 0.000249 | 0.000202 | 6935/7048 | 22 |
| BP | GO:0048762 | mesenchymal cell differentiation                 | 24/660 | 229/18866 | 1.77E-06 | 0.000259 | 0.00021  | 54361/101 | 24 |
| BP | GO:0070661 | leukocyte proliferation                          | 29/660 | 313/18866 | 1.95E-06 | 0.000278 | 0.000225 | 7535/5436 | 29 |
| BP | GO:0030336 | negative regulation of cell migration            | 31/660 | 350/18866 | 2.26E-06 | 0.00031  | 0.000251 | 54361/704 | 31 |
| BP | GO:0030098 | lymphocyte differentiation                       | 32/660 | 368/18866 | 2.30E-06 | 0.00031  | 0.000251 | 678/6935/ | 32 |
| BP | GO:0014033 | neural crest cell differentiation                | 14/660 | 89/18866  | 2.42E-06 | 0.000318 | 0.000258 | 6591/6469 | 14 |
| BP | GO:0046651 | lymphocyte proliferation                         | 27/660 | 283/18866 | 2.53E-06 | 0.000323 | 0.000262 | 7535/5436 | 27 |
| BP | GO:0002576 | platelet degranulation                           | 17/660 | 129/18866 | 2.64E-06 | 0.00033  | 0.000267 | 10490/707 | 17 |
| BP | GO:0030203 | glycosaminoglycan metabolic process              | 19/660 | 158/18866 | 2.80E-06 | 0.000342 | 0.000277 | 7040/5557 | 19 |
| BP | GO:0032943 | mononuclear cell proliferation                   | 27/660 | 286/18866 | 3.08E-06 | 0.000367 | 0.000298 | 7535/5436 | 27 |
| BP | GO:0045667 | regulation of osteoblast differentiation         | 17/660 | 131/18866 | 3.27E-06 | 0.000381 | 0.000309 | 23051/543 | 17 |
| BP | GO:0007178 | transmembrane receptor protein serine/threonine  | 31/660 | 359/18866 | 3.82E-06 | 0.000434 | 0.000352 | 7791/2309 | 31 |
| BP | GO:1903035 | negative regulation of response to wounding      | 14/660 | 93/18866  | 4.14E-06 | 0.000461 | 0.000373 | 54361/703 | 14 |
| BP | GO:0071902 | positive regulation of protein serine/threonine  | 30/660 | 345/18866 | 4.75E-06 | 0.000517 | 0.000419 | 7099/7040 | 30 |
| BP | GO:0030278 | regulation of ossification                       | 22/660 | 212/18866 | 5.56E-06 | 0.000594 | 0.000481 | 23051/543 | 22 |
| BP | GO:0048863 | stem cell differentiation                        | 25/660 | 264/18866 | 6.74E-06 | 0.000691 | 0.000559 | 678/8626/ | 25 |
| BP | GO:0048732 | gland development                                | 35/660 | 443/18866 | 6.74E-06 | 0.000691 | 0.000559 | 54361/799 | 35 |
| BP | GO:0006027 | glycosaminoglycan catabolic process              | 11/660 | 61/18866  | 7.51E-06 | 0.000755 | 0.000611 | 7040/5557 | 11 |
| BP | GO:0045785 | positive regulation of cell adhesion             | 34/660 | 428/18866 | 8.12E-06 | 0.000799 | 0.000648 | 7535/5436 | 34 |
| BP | GO:0006022 | aminoglycan metabolic process                    | 19/660 | 172/18866 | 9.80E-06 | 0.000947 | 0.000768 | 7040/5557 | 19 |
| BP | GO:0032102 | negative regulation of response to external      | 34/660 | 433/18866 | 1.04E-05 | 0.000985 | 0.000798 | 54361/713 | 34 |
| BP | GO:1902105 | regulation of leukocyte differentiation          | 26/660 | 290/18866 | 1.18E-05 | 0.001089 | 0.000882 | 678/6935/ | 26 |
| BP | GO:0071383 | cellular response to steroid hormone stimulus    | 21/660 | 206/18866 | 1.19E-05 | 0.001089 | 0.000882 | 678/7337/ | 21 |

|    |            |                                                       |        |           |          |          |          |           |    |
|----|------------|-------------------------------------------------------|--------|-----------|----------|----------|----------|-----------|----|
| BP | GO:0010634 | positive regulation of epithelial cell migration      | 19/660 | 176/18866 | 1.37E-05 | 0.001224 | 0.000991 | 7048/7040 | 19 |
| BP | GO:0022407 | regulation of cell-cell adhesion                      | 34/660 | 439/18866 | 1.39E-05 | 0.001224 | 0.000991 | 7535/5436 | 34 |
| BP | GO:0032970 | regulation of actin filament-based process            | 32/660 | 405/18866 | 1.66E-05 | 0.001443 | 0.001169 | 54361/508 | 32 |
| BP | GO:0002683 | negative regulation of immune system process          | 35/660 | 463/18866 | 1.74E-05 | 0.001449 | 0.001174 | 7292/2895 | 35 |
| BP | GO:0045621 | positive regulation of lymphocyte differentiation     | 14/660 | 105/18866 | 1.74E-05 | 0.001449 | 0.001174 | 7535/7292 | 14 |
| BP | GO:1901342 | regulation of vasculature development                 | 34/660 | 444/18866 | 1.75E-05 | 0.001449 | 0.001174 | 54361/704 | 34 |
| BP | GO:0042326 | negative regulation of phosphorylation                | 36/660 | 484/18866 | 1.87E-05 | 0.001523 | 0.001234 | 65125/724 | 36 |
| BP | GO:0006026 | aminoglycan catabolic process                         | 11/660 | 67/18866  | 1.91E-05 | 0.001528 | 0.001238 | 7040/5557 | 11 |
| BP | GO:0014032 | neural crest cell development                         | 12/660 | 80/18866  | 2.08E-05 | 0.001637 | 0.001326 | 6591/6469 | 12 |
| BP | GO:0007162 | negative regulation of cell adhesion                  | 26/660 | 301/18866 | 2.27E-05 | 0.001746 | 0.001415 | 65125/729 | 26 |
| BP | GO:0018108 | peptidyl-tyrosine phosphorylation                     | 30/660 | 374/18866 | 2.28E-05 | 0.001746 | 0.001415 | 7535/7132 | 30 |
| BP | GO:0019216 | regulation of lipid metabolic process                 | 33/660 | 431/18866 | 2.33E-05 | 0.001757 | 0.001423 | 54361/713 | 33 |
| BP | GO:1904375 | regulation of protein localization to cell periphery  | 15/660 | 123/18866 | 2.60E-05 | 0.001933 | 0.001566 | 10490/704 | 15 |
| BP | GO:0018212 | peptidyl-tyrosine modification                        | 30/660 | 377/18866 | 2.66E-05 | 0.001944 | 0.001575 | 7535/7132 | 30 |
| BP | GO:1901653 | cellular response to peptide                          | 31/660 | 398/18866 | 2.96E-05 | 0.002134 | 0.001729 | 7249/7099 | 31 |
| BP | GO:0150146 | cell junction disassembly                             | 6/660  | 19/18866  | 3.29E-05 | 0.002342 | 0.001897 | 6591/1098 | 6  |
| BP | GO:1905314 | semi-lunar valve development                          | 8/660  | 37/18866  | 3.38E-05 | 0.002342 | 0.001897 | 7132/7040 | 8  |
| BP | GO:0014031 | mesenchymal cell development                          | 12/660 | 84/18866  | 3.43E-05 | 0.002342 | 0.001897 | 6591/6469 | 12 |
| BP | GO:0048864 | stem cell development                                 | 12/660 | 84/18866  | 3.43E-05 | 0.002342 | 0.001897 | 6591/6469 | 12 |
| BP | GO:0007159 | leukocyte cell-cell adhesion                          | 29/660 | 364/18866 | 3.53E-05 | 0.002378 | 0.001926 | 7535/6512 | 29 |
| BP | GO:0048545 | response to steroid hormone                           | 28/660 | 346/18866 | 3.63E-05 | 0.002417 | 0.001958 | 678/7337  | 28 |
| BP | GO:0045765 | regulation of angiogenesis                            | 31/660 | 403/18866 | 3.75E-05 | 0.002435 | 0.001973 | 7048/6558 | 31 |
| BP | GO:0048660 | regulation of smooth muscle cell proliferation        | 18/660 | 173/18866 | 3.76E-05 | 0.002435 | 0.001973 | 7048/5159 | 18 |
| BP | GO:0032963 | collagen metabolic process                            | 14/660 | 113/18866 | 4.02E-05 | 0.002545 | 0.002062 | 54361/704 | 14 |
| BP | GO:1903510 | mucopolysaccharide metabolic process                  | 14/660 | 113/18866 | 4.02E-05 | 0.002545 | 0.002062 | 7040/5557 | 14 |
| BP | GO:0050866 | negative regulation of cell activation                | 20/660 | 207/18866 | 4.15E-05 | 0.00255  | 0.002066 | 7292/2320 | 20 |
| BP | GO:0048009 | insulin-like growth factor receptor signaling         | 8/660  | 38/18866  | 4.15E-05 | 0.00255  | 0.002066 | 7249/5295 | 8  |
| BP | GO:0051051 | negative regulation of transport                      | 35/660 | 483/18866 | 4.18E-05 | 0.00255  | 0.002066 | 65125/713 | 35 |
| BP | GO:0050727 | regulation of inflammatory response                   | 32/660 | 425/18866 | 4.28E-05 | 0.002576 | 0.002087 | 7791/1031 | 32 |
| BP | GO:0010712 | regulation of collagen metabolic process              | 9/660  | 49/18866  | 4.36E-05 | 0.002576 | 0.002087 | 54361/704 | 9  |
| BP | GO:0048659 | smooth muscle cell proliferation                      | 18/660 | 175/18866 | 4.38E-05 | 0.002576 | 0.002087 | 7048/5159 | 18 |
| BP | GO:0003170 | heart valve development                               | 10/660 | 61/18866  | 4.61E-05 | 0.002686 | 0.002176 | 7132/7048 | 10 |
| BP | GO:0014706 | striated muscle tissue development                    | 30/660 | 389/18866 | 4.76E-05 | 0.002739 | 0.002219 | 7048/7040 | 30 |
| BP | GO:0001894 | tissue homeostasis                                    | 23/660 | 261/18866 | 4.88E-05 | 0.002752 | 0.00223  | 7099/2734 | 23 |
| BP | GO:0003012 | muscle system process                                 | 34/660 | 467/18866 | 4.89E-05 | 0.002752 | 0.00223  | 10911/713 | 34 |
| BP | GO:0060537 | muscle tissue development                             | 31/660 | 409/18866 | 4.96E-05 | 0.002761 | 0.002237 | 7048/7040 | 31 |
| BP | GO:0033002 | muscle cell proliferation                             | 22/660 | 244/18866 | 5.02E-05 | 0.002766 | 0.002241 | 7048/6469 | 22 |
| BP | GO:1903076 | regulation of protein localization to plasma membrane | 13/660 | 102/18866 | 5.59E-05 | 0.003046 | 0.002468 | 10490/704 | 13 |

|    |            |                                                                       |        |           |          |          |          |           |    |
|----|------------|-----------------------------------------------------------------------|--------|-----------|----------|----------|----------|-----------|----|
| BP | GO:1901136 | carbohydrate derivative catabolic process                             | 19/660 | 195/18866 | 5.71E-05 | 0.00308  | 0.002496 | 7040/5557 | 19 |
| BP | GO:0071526 | semaphorin-plexin signaling pathway                                   | 8/660  | 40/18866  | 6.13E-05 | 0.003273 | 0.002651 | 8482/9037 | 8  |
| BP | GO:0050673 | epithelial cell proliferation                                         | 33/660 | 453/18866 | 6.22E-05 | 0.003286 | 0.002662 | 8626/7099 | 33 |
| BP | GO:0045619 | regulation of lymphocyte differentiation                              | 18/660 | 181/18866 | 6.82E-05 | 0.003563 | 0.002886 | 678/6935/ | 18 |
| BP | GO:0003179 | heart valve morphogenesis                                             | 9/660  | 52/18866  | 7.11E-05 | 0.003679 | 0.00298  | 7048/7040 | 9  |
| BP | GO:0060411 | cardiac septum morphogenesis                                          | 11/660 | 77/18866  | 7.24E-05 | 0.003696 | 0.002994 | 7048/1051 | 11 |
| BP | GO:0032956 | regulation of actin cytoskeleton organization                         | 28/660 | 360/18866 | 7.29E-05 | 0.003696 | 0.002994 | 54361/508 | 28 |
| BP | GO:0061037 | negative regulation of cartilage development                          | 7/660  | 31/18866  | 7.85E-05 | 0.00394  | 0.003192 | 6591/5744 | 7  |
| BP | GO:0032964 | collagen biosynthetic process                                         | 9/660  | 53/18866  | 8.30E-05 | 0.004084 | 0.003309 | 54361/704 | 9  |
| BP | GO:0014812 | muscle cell migration                                                 | 13/660 | 106/18866 | 8.37E-05 | 0.004084 | 0.003309 | 5327/5159 | 13 |
| BP | GO:0046632 | alpha-beta T cell differentiation                                     | 13/660 | 106/18866 | 8.37E-05 | 0.004084 | 0.003309 | 7535/7292 | 13 |
| BP | GO:0045582 | positive regulation of T cell differentiation                         | 12/660 | 92/18866  | 8.54E-05 | 0.004121 | 0.003339 | 7535/7292 | 12 |
| BP | GO:0030217 | T cell differentiation                                                | 22/660 | 253/18866 | 8.61E-05 | 0.004121 | 0.003339 | 678/6935/ | 22 |
| BP | GO:0007409 | axonogenesis                                                          | 34/660 | 482/18866 | 9.09E-05 | 0.004184 | 0.00339  | 8408/2290 | 34 |
| BP | GO:0090092 | regulation of transmembrane receptor protein tyrosine phosphorylation | 22/660 | 254/18866 | 9.12E-05 | 0.004184 | 0.00339  | 23090/693 | 22 |
| BP | GO:0050670 | regulation of lymphocyte proliferation                                | 20/660 | 219/18866 | 9.14E-05 | 0.004184 | 0.00339  | 7535/7292 | 20 |
| BP | GO:0010827 | regulation of glucose transmembrane transport                         | 11/660 | 79/18866  | 9.19E-05 | 0.004184 | 0.00339  | 6041/2343 | 11 |
| BP | GO:0007179 | transforming growth factor beta receptor signaling pathway            | 19/660 | 202/18866 | 9.19E-05 | 0.004184 | 0.00339  | 7791/6935 | 19 |
| BP | GO:0007265 | Ras protein signal transduction                                       | 27/660 | 346/18866 | 9.23E-05 | 0.004184 | 0.00339  | 10155/712 | 27 |
| BP | GO:0042110 | T cell activation                                                     | 34/660 | 483/18866 | 9.47E-05 | 0.004194 | 0.003397 | 678/6935/ | 34 |
| BP | GO:0046777 | protein autophosphorylation                                           | 21/660 | 237/18866 | 9.49E-05 | 0.004194 | 0.003397 | 7535/8408 | 21 |
| BP | GO:0014909 | smooth muscle cell migration                                          | 12/660 | 93/18866  | 9.50E-05 | 0.004194 | 0.003397 | 5327/5159 | 12 |
| BP | GO:0003176 | aortic valve development                                              | 7/660  | 32/18866  | 9.74E-05 | 0.004246 | 0.00344  | 7132/7040 | 7  |
| BP | GO:0001933 | negative regulation of protein phosphorylation                        | 32/660 | 444/18866 | 9.78E-05 | 0.004246 | 0.00344  | 65125/724 | 32 |
| BP | GO:1903037 | regulation of leukocyte cell-cell adhesion                            | 26/660 | 329/18866 | 0.000101 | 0.004342 | 0.003517 | 7535/6512 | 26 |
| BP | GO:0032944 | regulation of mononuclear cell proliferation                          | 20/660 | 221/18866 | 0.000104 | 0.00442  | 0.003581 | 7535/7292 | 20 |
| BP | GO:0043401 | steroid hormone mediated signaling pathway                            | 15/660 | 139/18866 | 0.000108 | 0.004562 | 0.003696 | 7337/8626 | 15 |
| BP | GO:0070977 | bone maturation                                                       | 6/660  | 23/18866  | 0.000109 | 0.004562 | 0.003696 | 6261/387/ | 6  |
| BP | GO:0043434 | response to peptide hormone                                           | 32/660 | 447/18866 | 0.000111 | 0.004615 | 0.003739 | 54832/724 | 32 |
| BP | GO:0070663 | regulation of leukocyte proliferation                                 | 21/660 | 240/18866 | 0.000113 | 0.004683 | 0.003794 | 7535/7292 | 21 |
| BP | GO:0003007 | heart morphogenesis                                                   | 22/660 | 258/18866 | 0.000115 | 0.004697 | 0.003806 | 7048/7040 | 22 |
| BP | GO:0016239 | positive regulation of macroautophagy                                 | 10/660 | 68/18866  | 0.000119 | 0.004856 | 0.003934 | 54832/840 | 10 |
| BP | GO:1903053 | regulation of extracellular matrix organization                       | 8/660  | 44/18866  | 0.000125 | 0.00504  | 0.004083 | 7132/7040 | 8  |
| BP | GO:0003018 | vascular process in circulatory system                                | 18/660 | 190/18866 | 0.000127 | 0.005095 | 0.004128 | 10911/704 | 18 |
| BP | GO:1903707 | negative regulation of hemopoiesis                                    | 16/660 | 158/18866 | 0.000138 | 0.005466 | 0.004428 | 7292/2895 | 16 |
| BP | GO:0060396 | growth hormone receptor signaling pathway                             | 6/660  | 24/18866  | 0.000141 | 0.00554  | 0.004488 | 6777/6776 | 6  |
| BP | GO:0030111 | regulation of Wnt signaling pathway                                   | 28/660 | 375/18866 | 0.000146 | 0.005712 | 0.004627 | 65125/799 | 28 |
| BP | GO:1902107 | positive regulation of leukocyte differentiation                      | 16/660 | 159/18866 | 0.000148 | 0.005751 | 0.004659 | 7535/7292 | 16 |

|    |            |                                                                    |        |           |          |          |          |           |    |
|----|------------|--------------------------------------------------------------------|--------|-----------|----------|----------|----------|-----------|----|
| BP | GO:0046578 | regulation of Ras protein signal transduction                      | 18/660 | 194/18866 | 0.000166 | 0.00638  | 0.005169 | 7126/8878 | 18 |
| BP | GO:0046579 | positive regulation of Ras protein signal transduction             | 10/660 | 71/18866  | 0.000173 | 0.0066   | 0.005347 | 5159/1098 | 10 |
| BP | GO:0003279 | cardiac septum development                                         | 13/660 | 114/18866 | 0.000177 | 0.006702 | 0.00543  | 7048/1051 | 13 |
| BP | GO:0071378 | cellular response to growth hormone stimulation                    | 6/660  | 25/18866  | 0.00018  | 0.006763 | 0.005479 | 6777/6776 | 6  |
| BP | GO:0043405 | regulation of MAP kinase activity                                  | 26/660 | 342/18866 | 0.000188 | 0.006993 | 0.005665 | 7099/7040 | 26 |
| BP | GO:0051056 | regulation of small GTPase mediated signaling pathway              | 25/660 | 323/18866 | 0.000188 | 0.006993 | 0.005665 | 7249/7126 | 25 |
| BP | GO:0061035 | regulation of cartilage development                                | 10/660 | 72/18866  | 0.000194 | 0.007096 | 0.005749 | 6591/8607 | 10 |
| BP | GO:0042306 | regulation of protein import into nucleus                          | 9/660  | 59/18866  | 0.000195 | 0.007096 | 0.005749 | 10155/704 | 9  |
| BP | GO:0048008 | platelet-derived growth factor receptor signaling pathway          | 9/660  | 59/18866  | 0.000195 | 0.007096 | 0.005749 | 10628/532 | 9  |
| BP | GO:0050772 | positive regulation of axonogenesis                                | 11/660 | 86/18866  | 0.000199 | 0.007192 | 0.005826 | 22906/848 | 11 |
| BP | GO:0003206 | cardiac chamber morphogenesis                                      | 14/660 | 131/18866 | 0.000202 | 0.007192 | 0.005826 | 7048/7040 | 14 |
| BP | GO:0046638 | positive regulation of alpha-beta T cell differentiation           | 8/660  | 47/18866  | 0.000202 | 0.007192 | 0.005826 | 7535/7292 | 8  |
| BP | GO:0048608 | reproductive structure development                                 | 31/660 | 443/18866 | 0.000211 | 0.007469 | 0.006051 | 54361/733 | 31 |
| BP | GO:0034405 | response to fluid shear stress                                     | 7/660  | 36/18866  | 0.000214 | 0.007507 | 0.006081 | 5311/5159 | 7  |
| BP | GO:0032967 | positive regulation of collagen biosynthesis                       | 6/660  | 26/18866  | 0.000227 | 0.007896 | 0.006396 | 54361/704 | 6  |
| BP | GO:0042113 | B cell activation                                                  | 25/660 | 328/18866 | 0.000238 | 0.008252 | 0.006685 | 678/75357 | 25 |
| BP | GO:0009755 | hormone-mediated signaling pathway                                 | 18/660 | 200/18866 | 0.000242 | 0.008267 | 0.006697 | 7337/8626 | 18 |
| BP | GO:0031032 | actomyosin structure organization                                  | 18/660 | 200/18866 | 0.000242 | 0.008267 | 0.006697 | 7791/5436 | 18 |
| BP | GO:0061458 | reproductive system development                                    | 31/660 | 447/18866 | 0.000247 | 0.008393 | 0.0068   | 54361/733 | 31 |
| BP | GO:0045580 | regulation of T cell differentiation                               | 15/660 | 150/18866 | 0.000253 | 0.008481 | 0.006871 | 6935/7535 | 15 |
| BP | GO:0046324 | regulation of glucose import                                       | 9/660  | 61/18866  | 0.000253 | 0.008481 | 0.006871 | 6041/2343 | 9  |
| BP | GO:0002695 | negative regulation of leukocyte activation                        | 17/660 | 184/18866 | 0.000262 | 0.008717 | 0.007062 | 7292/2320 | 17 |
| BP | GO:0002460 | adaptive immune response based on somatostatin                     | 27/660 | 370/18866 | 0.000276 | 0.009108 | 0.007378 | 7292/7099 | 27 |
| BP | GO:0003148 | outflow tract septum morphogenesis                                 | 6/660  | 27/18866  | 0.000283 | 0.009168 | 0.007427 | 7048/1051 | 6  |
| BP | GO:0010714 | positive regulation of collagen metabolic process                  | 6/660  | 27/18866  | 0.000283 | 0.009168 | 0.007427 | 54361/704 | 6  |
| BP | GO:0048799 | animal organ maturation                                            | 6/660  | 27/18866  | 0.000283 | 0.009168 | 0.007427 | 6261/3877 | 6  |
| BP | GO:1904589 | regulation of protein import                                       | 9/660  | 62/18866  | 0.000287 | 0.009256 | 0.007498 | 10155/704 | 9  |
| BP | GO:0050708 | regulation of protein secretion                                    | 26/660 | 352/18866 | 0.000295 | 0.009436 | 0.007644 | 79971/729 | 26 |
| BP | GO:0060828 | regulation of canonical Wnt signaling pathway                      | 23/660 | 295/18866 | 0.000303 | 0.009616 | 0.00779  | 65125/799 | 23 |
| BP | GO:1902106 | negative regulation of leukocyte differentiation                   | 12/660 | 105/18866 | 0.000304 | 0.009616 | 0.00779  | 7292/2895 | 12 |
| BP | GO:0032496 | response to lipopolysaccharide                                     | 25/660 | 334/18866 | 0.000314 | 0.009832 | 0.007965 | 7292/7099 | 25 |
| BP | GO:0030195 | negative regulation of blood coagulation                           | 8/660  | 50/18866  | 0.000315 | 0.009832 | 0.007965 | 7035/7107 | 8  |
| BP | GO:0046849 | bone remodeling                                                    | 11/660 | 91/18866  | 0.00033  | 0.010229 | 0.008287 | 7040/9770 | 11 |
| BP | GO:0034446 | substrate adhesion-dependent cell spreading                        | 12/660 | 106/18866 | 0.000332 | 0.010253 | 0.008306 | 6239/3877 | 12 |
| BP | GO:0003180 | aortic valve morphogenesis                                         | 6/660  | 28/18866  | 0.000349 | 0.010506 | 0.008511 | 7040/6591 | 6  |
| BP | GO:0061437 | renal system vasculature development                               | 6/660  | 28/18866  | 0.000349 | 0.010506 | 0.008511 | 5311/5159 | 6  |
| BP | GO:0061440 | kidney vasculature development                                     | 6/660  | 28/18866  | 0.000349 | 0.010506 | 0.008511 | 5311/5159 | 6  |
| BP | GO:0071880 | adenylate cyclase-activating adrenergic receptor signaling pathway | 6/660  | 28/18866  | 0.000349 | 0.010506 | 0.008511 | 5350/2771 | 6  |

|    |            |                                                        |        |           |          |          |          |           |    |
|----|------------|--------------------------------------------------------|--------|-----------|----------|----------|----------|-----------|----|
| BP | GO:0019935 | cyclic-nucleotide-mediated signaling                   | 19/660 | 224/18866 | 0.000351 | 0.010506 | 0.008511 | 5744/5577 | 19 |
| BP | GO:0060416 | response to growth hormone                             | 7/660  | 39/18866  | 0.00036  | 0.010598 | 0.008586 | 6777/6776 | 7  |
| BP | GO:1903706 | regulation of hemopoiesis                              | 33/660 | 498/18866 | 0.00036  | 0.010598 | 0.008586 | 678/6935/ | 33 |
| BP | GO:0043277 | apoptotic cell clearance                               | 8/660  | 51/18866  | 0.000362 | 0.010598 | 0.008586 | 80208/399 | 8  |
| BP | GO:1900047 | negative regulation of hemostasis                      | 8/660  | 51/18866  | 0.000362 | 0.010598 | 0.008586 | 7035/710/ | 8  |
| BP | GO:0051057 | positive regulation of small GTPase mediated           | 10/660 | 78/18866  | 0.000378 | 0.011001 | 0.008912 | 5159/1098 | 10 |
| BP | GO:0060070 | canonical Wnt signaling pathway                        | 25/660 | 339/18866 | 0.000392 | 0.011227 | 0.009095 | 54361/651 | 25 |
| BP | GO:0002062 | chondrocyte differentiation                            | 12/660 | 108/18866 | 0.000395 | 0.011227 | 0.009095 | 7048/7040 | 12 |
| BP | GO:0006024 | glycosaminoglycan biosynthetic process                 | 12/660 | 108/18866 | 0.000395 | 0.011227 | 0.009095 | 7040/1104 | 12 |
| BP | GO:0031589 | cell-substrate adhesion                                | 26/660 | 359/18866 | 0.000399 | 0.011227 | 0.009095 | 7791/5436 | 26 |
| BP | GO:0045063 | T-helper 1 cell differentiation                        | 5/660  | 19/18866  | 0.000399 | 0.011227 | 0.009095 | 7292/6421 | 5  |
| BP | GO:0072074 | kidney mesenchyme development                          | 5/660  | 19/18866  | 0.000399 | 0.011227 | 0.009095 | 54361/646 | 5  |
| BP | GO:0086023 | adenylate cyclase-activating adrenergic receptor       | 4/660  | 11/18866  | 0.000402 | 0.011263 | 0.009125 | 5350/2771 | 4  |
| BP | GO:0003205 | cardiac chamber development                            | 16/660 | 174/18866 | 0.000415 | 0.011549 | 0.009356 | 7048/7040 | 16 |
| BP | GO:0006809 | nitric oxide biosynthetic process                      | 10/660 | 79/18866  | 0.000419 | 0.011613 | 0.009408 | 7099/6542 | 10 |
| BP | GO:0042307 | positive regulation of protein import into nucleus     | 7/660  | 40/18866  | 0.000423 | 0.011658 | 0.009445 | 10155/704 | 7  |
| BP | GO:0009306 | protein secretion                                      | 31/660 | 462/18866 | 0.000436 | 0.01194  | 0.009673 | 79971/729 | 31 |
| BP | GO:0003014 | renal system process                                   | 13/660 | 125/18866 | 0.00044  | 0.011962 | 0.00969  | 387/5577/ | 13 |
| BP | GO:0007411 | axon guidance                                          | 22/660 | 284/18866 | 0.000443 | 0.011962 | 0.00969  | 6709/6469 | 22 |
| BP | GO:0030168 | platelet activation                                    | 15/660 | 158/18866 | 0.000444 | 0.011962 | 0.00969  | 7099/5270 | 15 |
| BP | GO:0035592 | establishment of protein localization to extracellular | 31/660 | 463/18866 | 0.000452 | 0.012124 | 0.009822 | 79971/729 | 31 |
| BP | GO:0097485 | neuron projection guidance                             | 22/660 | 285/18866 | 0.000465 | 0.012404 | 0.010049 | 6709/6469 | 22 |
| BP | GO:0090100 | positive regulation of transmembrane receptor          | 12/660 | 110/18866 | 0.000468 | 0.012418 | 0.01006  | 23090/704 | 12 |
| BP | GO:0070371 | ERK1 and ERK2 cascade                                  | 24/660 | 325/18866 | 0.000498 | 0.01316  | 0.010662 | 678/10318 | 24 |
| BP | GO:0048738 | cardiac muscle tissue development                      | 19/660 | 231/18866 | 0.000514 | 0.013502 | 0.010938 | 7048/7040 | 19 |
| BP | GO:0043931 | ossification involved in bone maturation               | 5/660  | 20/18866  | 0.000517 | 0.013502 | 0.010938 | 6261/387/ | 5  |
| BP | GO:0060249 | anatomical structure homeostasis                       | 31/660 | 469/18866 | 0.000561 | 0.014586 | 0.011817 | 3104/8035 | 31 |
| BP | GO:0030193 | regulation of blood coagulation                        | 10/660 | 82/18866  | 0.000567 | 0.014672 | 0.011886 | 7099/7035 | 10 |
| BP | GO:1904591 | positive regulation of protein import                  | 7/660  | 42/18866  | 0.000577 | 0.014842 | 0.012024 | 10155/704 | 7  |
| BP | GO:0071692 | protein localization to extracellular region           | 31/660 | 470/18866 | 0.000581 | 0.014883 | 0.012057 | 79971/729 | 31 |
| BP | GO:0051549 | positive regulation of keratinocyte migration          | 4/660  | 12/18866  | 0.000587 | 0.014883 | 0.012057 | 10982/944 | 4  |
| BP | GO:0070493 | thrombin-activated receptor signaling pathway          | 4/660  | 12/18866  | 0.000587 | 0.014883 | 0.012057 | 4233/3248 | 4  |
| BP | GO:0050819 | negative regulation of coagulation                     | 8/660  | 55/18866  | 0.000612 | 0.015454 | 0.01252  | 7035/710/ | 8  |
| BP | GO:0071375 | cellular response to peptide hormone stimulus          | 24/660 | 330/18866 | 0.000619 | 0.015548 | 0.012596 | 7249/6777 | 24 |
| BP | GO:1900046 | regulation of hemostasis                               | 10/660 | 83/18866  | 0.000625 | 0.015566 | 0.01261  | 7099/7035 | 10 |
| BP | GO:0030316 | osteoclast differentiation                             | 11/660 | 98/18866  | 0.000626 | 0.015566 | 0.01261  | 7099/9770 | 11 |
| BP | GO:1903039 | positive regulation of leukocyte cell-cell adhesion    | 19/660 | 235/18866 | 0.000635 | 0.015701 | 0.012719 | 7535/7292 | 19 |
| BP | GO:0032147 | activation of protein kinase activity                  | 24/660 | 331/18866 | 0.000646 | 0.015856 | 0.012846 | 65125/709 | 24 |

|    |            |                                               |        |           |          |          |          |           |    |
|----|------------|-----------------------------------------------|--------|-----------|----------|----------|----------|-----------|----|
| BP | GO:0010810 | regulation of cell-substrate adhesion         | 18/660 | 217/18866 | 0.000647 | 0.015856 | 0.012846 | 54361/623 | 18 |
| BP | GO:0003177 | pulmonary valve development                   | 5/660  | 21/18866  | 0.000659 | 0.016067 | 0.013017 | 7132/4846 | 5  |
| BP | GO:0030521 | androgen receptor signaling pathway           | 7/660  | 43/18866  | 0.000668 | 0.016222 | 0.013142 | 7337/3871 | 7  |
| BP | GO:0046209 | nitric oxide metabolic process                | 10/660 | 84/18866  | 0.000688 | 0.016581 | 0.013433 | 7099/6542 | 10 |
| BP | GO:0019218 | regulation of steroid metabolic process       | 13/660 | 131/18866 | 0.00069  | 0.016581 | 0.013433 | 54361/677 | 13 |
| BP | GO:0001755 | neural crest cell migration                   | 8/660  | 56/18866  | 0.000693 | 0.016587 | 0.013438 | 6469/8482 | 8  |
| BP | GO:0006023 | aminoglycan biosynthetic process              | 12/660 | 115/18866 | 0.0007   | 0.016687 | 0.013519 | 7040/1104 | 12 |
| BP | GO:0006644 | phospholipid metabolic process                | 30/660 | 455/18866 | 0.000712 | 0.016895 | 0.013687 | 7040/6610 | 30 |
| BP | GO:0019932 | second-messenger-mediated signaling           | 30/660 | 456/18866 | 0.000738 | 0.017372 | 0.014074 | 7535/5164 | 30 |
| BP | GO:0010594 | regulation of endothelial cell migration      | 19/660 | 238/18866 | 0.00074  | 0.017372 | 0.014074 | 7040/6776 | 19 |
| BP | GO:1903531 | negative regulation of secretion by cell      | 15/660 | 166/18866 | 0.000746 | 0.017372 | 0.014074 | 7132/2320 | 15 |
| BP | GO:0071875 | adrenergic receptor signaling pathway         | 6/660  | 32/18866  | 0.000746 | 0.017372 | 0.014074 | 5350/2771 | 6  |
| BP | GO:0015749 | monosaccharide transmembrane transport        | 12/660 | 116/18866 | 0.000757 | 0.017544 | 0.014213 | 9962/6041 | 12 |
| BP | GO:0010463 | mesenchymal cell proliferation                | 7/660  | 44/18866  | 0.000771 | 0.01771  | 0.014348 | 6935/7048 | 7  |
| BP | GO:0032965 | regulation of collagen biosynthetic process   | 7/660  | 44/18866  | 0.000771 | 0.01771  | 0.014348 | 54361/704 | 7  |
| BP | GO:0042531 | positive regulation of tyrosine phosphoryla   | 9/660  | 71/18866  | 0.000798 | 0.018193 | 0.014739 | 7132/3717 | 9  |
| BP | GO:0002237 | response to molecule of bacterial origin      | 25/660 | 356/18866 | 0.000799 | 0.018193 | 0.014739 | 7292/7099 | 25 |
| BP | GO:0070665 | positive regulation of leukocyte proliferatio | 14/660 | 150/18866 | 0.000805 | 0.018253 | 0.014787 | 7535/7292 | 14 |
| BP | GO:0030282 | bone mineralization                           | 12/660 | 117/18866 | 0.000817 | 0.018441 | 0.014939 | 54361/704 | 12 |
| BP | GO:0021537 | telencephalon development                     | 20/660 | 259/18866 | 0.000824 | 0.018441 | 0.014939 | 56949/796 | 20 |
| BP | GO:0043568 | positive regulation of insulin-like growth fa | 4/660  | 13/18866  | 0.000824 | 0.018441 | 0.014939 | 3487/3486 | 4  |
| BP | GO:0014910 | regulation of smooth muscle cell migration    | 10/660 | 86/18866  | 0.000829 | 0.018443 | 0.014942 | 5159/8031 | 10 |
| BP | GO:0051251 | positive regulation of lymphocyte activation  | 25/660 | 357/18866 | 0.000832 | 0.018443 | 0.014942 | 7535/7292 | 25 |
| BP | GO:0022409 | positive regulation of cell-cell adhesion     | 21/660 | 279/18866 | 0.000858 | 0.018881 | 0.015296 | 7535/7292 | 21 |
| BP | GO:1903708 | positive regulation of hemopoiesis            | 17/660 | 204/18866 | 0.000859 | 0.018881 | 0.015296 | 7535/7292 | 17 |
| BP | GO:0007566 | embryo implantation                           | 8/660  | 58/18866  | 0.00088  | 0.019067 | 0.015446 | 10155/704 | 8  |
| BP | GO:0034219 | carbohydrate transmembrane transport          | 12/660 | 118/18866 | 0.000882 | 0.019067 | 0.015446 | 9962/6041 | 12 |
| BP | GO:0010464 | regulation of mesenchymal cell proliferatio   | 6/660  | 33/18866  | 0.000885 | 0.019067 | 0.015446 | 6935/7048 | 6  |
| BP | GO:0001974 | blood vessel remodeling                       | 7/660  | 45/18866  | 0.000886 | 0.019067 | 0.015446 | 7040/1051 | 7  |
| BP | GO:0010828 | positive regulation of glucose transmembra    | 7/660  | 45/18866  | 0.000886 | 0.019067 | 0.015446 | 6041/2343 | 7  |
| BP | GO:2001057 | reactive nitrogen species metabolic proces    | 10/660 | 87/18866  | 0.000908 | 0.019442 | 0.015751 | 7099/6542 | 10 |
| BP | GO:0002285 | lymphocyte activation involved in immune      | 16/660 | 187/18866 | 0.000911 | 0.019442 | 0.015751 | 7292/7099 | 16 |
| BP | GO:0001837 | epithelial to mesenchymal transition          | 14/660 | 152/18866 | 0.000917 | 0.019497 | 0.015795 | 54361/101 | 14 |
| BP | GO:0070997 | neuron death                                  | 25/660 | 360/18866 | 0.000937 | 0.019825 | 0.016061 | 8626/7099 | 25 |
| BP | GO:0008630 | intrinsic apoptotic signaling pathway in res  | 11/660 | 103/18866 | 0.000953 | 0.020078 | 0.016266 | 8626/7132 | 11 |
| BP | GO:0002791 | regulation of peptide secretion               | 26/660 | 381/18866 | 0.000964 | 0.020232 | 0.016391 | 79971/729 | 26 |
| BP | GO:0010517 | regulation of phospholipase activity          | 9/660  | 73/18866  | 0.000978 | 0.020408 | 0.016533 | 5330/5159 | 9  |
| BP | GO:0050671 | positive regulation of lymphocyte proliferat  | 13/660 | 136/18866 | 0.00098  | 0.020408 | 0.016533 | 7535/7292 | 13 |



|    |            |                                                               |        |           |          |          |          |           |    |
|----|------------|---------------------------------------------------------------|--------|-----------|----------|----------|----------|-----------|----|
| BP | GO:0050818 | regulation of coagulation                                     | 10/660 | 88/18866  | 0.000993 | 0.020555 | 0.016652 | 7099/7035 | 10 |
| BP | GO:0050730 | regulation of peptidyl-tyrosine phosphorylation               | 20/660 | 263/18866 | 0.000995 | 0.020555 | 0.016652 | 7132/7040 | 20 |
| BP | GO:0006936 | muscle contraction                                            | 25/660 | 362/18866 | 0.001013 | 0.02069  | 0.016762 | 10911/808 | 25 |
| BP | GO:0010761 | fibroblast migration                                          | 7/660  | 46/18866  | 0.001014 | 0.02069  | 0.016762 | 7040/7989 | 7  |
| BP | GO:0010863 | positive regulation of phospholipase C activity               | 7/660  | 46/18866  | 0.001014 | 0.02069  | 0.016762 | 5330/5159 | 7  |
| BP | GO:1903077 | negative regulation of protein localization to cell periphery | 5/660  | 23/18866  | 0.001028 | 0.020895 | 0.016928 | 7040/2343 | 5  |
| BP | GO:0044706 | multi-multicellular organism process                          | 18/660 | 226/18866 | 0.001036 | 0.020979 | 0.016996 | 54361/101 | 18 |
| BP | GO:0043406 | positive regulation of MAP kinase activity                    | 20/660 | 264/18866 | 0.001043 | 0.021023 | 0.017032 | 7099/7040 | 20 |
| BP | GO:0032946 | positive regulation of mononuclear cell proliferation         | 13/660 | 137/18866 | 0.001049 | 0.021073 | 0.017072 | 7535/7292 | 13 |
| BP | GO:0051048 | negative regulation of secretion                              | 16/660 | 190/18866 | 0.001079 | 0.021588 | 0.017489 | 7132/2320 | 16 |
| BP | GO:0030865 | cortical cytoskeleton organization                            | 8/660  | 60/18866  | 0.001105 | 0.021944 | 0.017778 | 23433/399 | 8  |
| BP | GO:0010935 | regulation of macrophage cytokine production                  | 4/660  | 14/18866  | 0.001122 | 0.021944 | 0.017778 | 7099/7040 | 4  |
| BP | GO:0033604 | negative regulation of catecholamine secretion                | 4/660  | 14/18866  | 0.001122 | 0.021944 | 0.017778 | 23208/269 | 4  |
| BP | GO:0035810 | positive regulation of urine volume                           | 4/660  | 14/18866  | 0.001122 | 0.021944 | 0.017778 | 4881/8692 | 4  |
| BP | GO:0051547 | regulation of keratinocyte migration                          | 4/660  | 14/18866  | 0.001122 | 0.021944 | 0.017778 | 10982/944 | 4  |
| BP | GO:0060397 | growth hormone receptor signaling pathway                     | 4/660  | 14/18866  | 0.001122 | 0.021944 | 0.017778 | 6777/6776 | 4  |
| BP | GO:0022408 | negative regulation of cell-cell adhesion                     | 16/660 | 191/18866 | 0.001141 | 0.022212 | 0.017994 | 65125/729 | 16 |
| BP | GO:0016049 | cell growth                                                   | 31/660 | 490/18866 | 0.001146 | 0.022225 | 0.018005 | 8408/7048 | 31 |
| BP | GO:0050919 | negative chemotaxis                                           | 7/660  | 47/18866  | 0.001156 | 0.022343 | 0.018101 | 8482/9037 | 7  |
| BP | GO:0043542 | endothelial cell migration                                    | 21/660 | 286/18866 | 0.001173 | 0.022595 | 0.018305 | 7040/6776 | 21 |
| BP | GO:0046427 | positive regulation of receptor signaling pathway             | 10/660 | 90/18866  | 0.001182 | 0.022608 | 0.018316 | 7132/3717 | 10 |
| BP | GO:0002573 | myeloid leukocyte differentiation                             | 17/660 | 210/18866 | 0.001183 | 0.022608 | 0.018316 | 7099/7048 | 17 |
| BP | GO:0046323 | glucose import                                                | 9/660  | 75/18866  | 0.00119  | 0.022653 | 0.018352 | 6041/2343 | 9  |
| BP | GO:0050920 | regulation of chemotaxis                                      | 18/660 | 229/18866 | 0.001204 | 0.022757 | 0.018436 | 65125/704 | 18 |
| BP | GO:0030038 | contractile actin filament bundle assembly                    | 11/660 | 106/18866 | 0.001208 | 0.022757 | 0.018436 | 7791/5436 | 11 |
| BP | GO:0043149 | stress fiber assembly                                         | 11/660 | 106/18866 | 0.001208 | 0.022757 | 0.018436 | 7791/5436 | 11 |
| BP | GO:0010259 | multicellular organism aging                                  | 6/660  | 35/18866  | 0.001223 | 0.022859 | 0.018518 | 8626/7799 | 6  |
| BP | GO:0098751 | bone cell development                                         | 6/660  | 35/18866  | 0.001223 | 0.022859 | 0.018518 | 5305/5048 | 6  |
| BP | GO:0033673 | negative regulation of kinase activity                        | 20/660 | 268/18866 | 0.001252 | 0.023057 | 0.018679 | 65125/724 | 20 |
| BP | GO:0010770 | positive regulation of cell morphogenesis in cell             | 14/660 | 157/18866 | 0.001256 | 0.023057 | 0.018679 | 22906/848 | 14 |
| BP | GO:0043271 | negative regulation of ion transport                          | 14/660 | 157/18866 | 0.001256 | 0.023057 | 0.018679 | 65125/232 | 14 |
| BP | GO:0051017 | actin filament bundle assembly                                | 14/660 | 157/18866 | 0.001256 | 0.023057 | 0.018679 | 7791/5436 | 14 |
| BP | GO:0030325 | adrenal gland development                                     | 5/660  | 24/18866  | 0.001262 | 0.023057 | 0.018679 | 54361/515 | 5  |
| BP | GO:0032331 | negative regulation of chondrocyte differentiation            | 5/660  | 24/18866  | 0.001262 | 0.023057 | 0.018679 | 6591/5744 | 5  |
| BP | GO:0097191 | extrinsic apoptotic signaling pathway                         | 18/660 | 230/18866 | 0.001265 | 0.023057 | 0.018679 | 7185/7132 | 18 |
| BP | GO:0034103 | regulation of tissue remodeling                               | 10/660 | 91/18866  | 0.001287 | 0.023297 | 0.018874 | 7040/4054 | 10 |
| BP | GO:0060021 | roof of mouth development                                     | 10/660 | 91/18866  | 0.001287 | 0.023297 | 0.018874 | 7048/6591 | 10 |
| BP | GO:0014911 | positive regulation of smooth muscle cell migration           | 7/660  | 48/18866  | 0.001313 | 0.023518 | 0.019052 | 5159/8031 | 7  |

|    |            |                                               |        |           |          |          |          |           |    |
|----|------------|-----------------------------------------------|--------|-----------|----------|----------|----------|-----------|----|
| BP | GO:0048701 | embryonic cranial skeleton morphogenesis      | 7/660  | 48/18866  | 0.001313 | 0.023518 | 0.019052 | 7048/860/ | 7  |
| BP | GO:1900274 | regulation of phospholipase C activity        | 7/660  | 48/18866  | 0.001313 | 0.023518 | 0.019052 | 5330/5159 | 7  |
| BP | GO:0035051 | cardiocyte differentiation                    | 14/660 | 158/18866 | 0.001335 | 0.023828 | 0.019303 | 7040/1051 | 14 |
| BP | GO:0042098 | T cell proliferation                          | 16/660 | 195/18866 | 0.001417 | 0.025116 | 0.020347 | 7535/5436 | 16 |
| BP | GO:0050731 | positive regulation of peptidyl-tyrosine pho  | 16/660 | 195/18866 | 0.001417 | 0.025116 | 0.020347 | 7132/7040 | 16 |
| BP | GO:0030500 | regulation of bone mineralization             | 9/660  | 77/18866  | 0.001437 | 0.025375 | 0.020557 | 54361/704 | 9  |
| BP | GO:0050870 | positive regulation of T cell activation      | 17/660 | 214/18866 | 0.001452 | 0.025561 | 0.020708 | 7535/7292 | 17 |
| BP | GO:0030879 | mammary gland development                     | 13/660 | 142/18866 | 0.001458 | 0.025572 | 0.020717 | 54361/704 | 13 |
| BP | GO:0045346 | regulation of MHC class II biosynthetic prod  | 4/660  | 15/18866  | 0.001489 | 0.025846 | 0.020938 | 7099/5196 | 4  |
| BP | GO:0060391 | positive regulation of SMAD protein signal    | 4/660  | 15/18866  | 0.001489 | 0.025846 | 0.020938 | 7040/3717 | 4  |
| BP | GO:0072075 | metanephric mesenchyme development            | 4/660  | 15/18866  | 0.001489 | 0.025846 | 0.020938 | 54361/646 | 4  |
| BP | GO:0007565 | female pregnancy                              | 16/660 | 196/18866 | 0.001494 | 0.02586  | 0.02095  | 54361/101 | 16 |
| BP | GO:0050863 | regulation of T cell activation               | 23/660 | 332/18866 | 0.00152  | 0.026134 | 0.021172 | 6935/7535 | 23 |
| BP | GO:1904894 | positive regulation of receptor signaling pa  | 10/660 | 93/18866  | 0.001521 | 0.026134 | 0.021172 | 7132/3717 | 10 |
| BP | GO:0046635 | positive regulation of alpha-beta T cell acti | 8/660  | 63/18866  | 0.001526 | 0.026134 | 0.021172 | 7535/7292 | 8  |
| BP | GO:1904376 | negative regulation of protein localization t | 5/660  | 25/18866  | 0.001532 | 0.026158 | 0.021191 | 7040/2343 | 5  |
| BP | GO:0035296 | regulation of tube diameter                   | 13/660 | 143/18866 | 0.001554 | 0.026341 | 0.021339 | 10911/387 | 13 |
| BP | GO:0097746 | regulation of blood vessel diameter           | 13/660 | 143/18866 | 0.001554 | 0.026341 | 0.021339 | 10911/387 | 13 |
| BP | GO:0018210 | peptidyl-threonine modification               | 12/660 | 126/18866 | 0.001563 | 0.026341 | 0.021339 | 65125/840 | 12 |
| BP | GO:0055007 | cardiac muscle cell differentiation           | 12/660 | 126/18866 | 0.001563 | 0.026341 | 0.021339 | 7040/1061 | 12 |
| BP | GO:0061572 | actin filament bundle organization            | 14/660 | 161/18866 | 0.001597 | 0.026826 | 0.021732 | 7791/5436 | 14 |
| BP | GO:0045444 | fat cell differentiation                      | 18/660 | 235/18866 | 0.00161  | 0.026867 | 0.021765 | 9658/678/ | 18 |
| BP | GO:0050678 | regulation of epithelial cell proliferation   | 26/660 | 395/18866 | 0.00161  | 0.026867 | 0.021765 | 8626/7099 | 26 |
| BP | GO:1904659 | glucose transmembrane transport               | 11/660 | 110/18866 | 0.001635 | 0.027164 | 0.022006 | 6041/2343 | 11 |
| BP | GO:0030212 | hyaluronan metabolic process                  | 6/660  | 37/18866  | 0.001651 | 0.027164 | 0.022006 | 7040/5557 | 6  |
| BP | GO:0048846 | axon extension involved in axon guidance      | 6/660  | 37/18866  | 0.001651 | 0.027164 | 0.022006 | 8482/9037 | 6  |
| BP | GO:1902284 | neuron projection extension involved in ne    | 6/660  | 37/18866  | 0.001651 | 0.027164 | 0.022006 | 8482/9037 | 6  |
| BP | GO:0035150 | regulation of tube size                       | 13/660 | 144/18866 | 0.001655 | 0.027164 | 0.022006 | 10911/387 | 13 |
| BP | GO:0010718 | positive regulation of epithelial to mesench  | 7/660  | 50/18866  | 0.001677 | 0.027448 | 0.022237 | 7048/7040 | 7  |
| BP | GO:0045453 | bone resorption                               | 8/660  | 64/18866  | 0.001691 | 0.027499 | 0.022278 | 4054/7970 | 8  |
| BP | GO:0046637 | regulation of alpha-beta T cell differenti    | 8/660  | 64/18866  | 0.001691 | 0.027499 | 0.022278 | 7535/7292 | 8  |
| BP | GO:0019933 | cAMP-mediated signaling                       | 16/660 | 199/18866 | 0.001748 | 0.028336 | 0.022956 | 5744/5577 | 16 |
| BP | GO:0070167 | regulation of biomineral tissue developmen    | 10/660 | 95/18866  | 0.001787 | 0.028732 | 0.023277 | 54361/704 | 10 |
| BP | GO:0110149 | regulation of biomineralization               | 10/660 | 95/18866  | 0.001787 | 0.028732 | 0.023277 | 54361/704 | 10 |
| BP | GO:0031214 | biomineral tissue development                 | 14/660 | 163/18866 | 0.001795 | 0.028732 | 0.023277 | 54361/704 | 14 |
| BP | GO:0110148 | biomineralization                             | 14/660 | 163/18866 | 0.001795 | 0.028732 | 0.023277 | 54361/704 | 14 |
| BP | GO:1901888 | regulation of cell junction assembly          | 16/660 | 200/18866 | 0.00184  | 0.029224 | 0.023675 | 54361/799 | 16 |
| BP | GO:0043567 | regulation of insulin-like growth factor rec  | 5/660  | 26/18866  | 0.001843 | 0.029224 | 0.023675 | 3489/3487 | 5  |

|    |            |                                                                           |        |           |          |          |          |           |    |
|----|------------|---------------------------------------------------------------------------|--------|-----------|----------|----------|----------|-----------|----|
| BP | GO:0072012 | glomerulus vasculature development                                        | 5/660  | 26/18866  | 0.001843 | 0.029224 | 0.023675 | 5159/5156 | 5  |
| BP | GO:0046631 | alpha-beta T cell activation                                              | 13/660 | 146/18866 | 0.001873 | 0.029609 | 0.023987 | 7535/7292 | 13 |
| BP | GO:0002312 | B cell activation involved in immune response                             | 9/660  | 80/18866  | 0.001883 | 0.029674 | 0.02404  | 7292/7099 | 9  |
| BP | GO:0071604 | transforming growth factor beta production                                | 6/660  | 38/18866  | 0.001903 | 0.02969  | 0.024053 | 4060/4054 | 6  |
| BP | GO:0050867 | positive regulation of cell activation                                    | 27/660 | 421/18866 | 0.001919 | 0.02969  | 0.024053 | 7535/7292 | 27 |
| BP | GO:0010934 | macrophage cytokine production                                            | 4/660  | 16/18866  | 0.00193  | 0.02969  | 0.024053 | 7099/7040 | 4  |
| BP | GO:0030214 | hyaluronan catabolic process                                              | 4/660  | 16/18866  | 0.00193  | 0.02969  | 0.024053 | 7040/5557 | 4  |
| BP | GO:0045342 | MHC class II biosynthetic process                                         | 4/660  | 16/18866  | 0.00193  | 0.02969  | 0.024053 | 7099/5196 | 4  |
| BP | GO:0072109 | glomerular mesangium development                                          | 4/660  | 16/18866  | 0.00193  | 0.02969  | 0.024053 | 5159/8031 | 4  |
| BP | GO:0086103 | G protein-coupled receptor signaling pathway                              | 4/660  | 16/18866  | 0.00193  | 0.02969  | 0.024053 | 5350/2771 | 4  |
| BP | GO:1905153 | regulation of membrane invagination                                       | 4/660  | 16/18866  | 0.00193  | 0.02969  | 0.024053 | 23208/110 | 4  |
| BP | GO:0030177 | positive regulation of Wnt signaling pathway                              | 15/660 | 183/18866 | 0.001991 | 0.030438 | 0.024658 | 65125/799 | 15 |
| BP | GO:0007189 | adenylate cyclase-activating G protein-coupled receptor signaling pathway | 13/660 | 147/18866 | 0.001991 | 0.030438 | 0.024658 | 5744/5350 | 13 |
| BP | GO:0052547 | regulation of peptidase activity                                          | 29/660 | 466/18866 | 0.002082 | 0.031731 | 0.025706 | 8626/7078 | 29 |
| BP | GO:0042100 | B cell proliferation                                                      | 10/660 | 97/18866  | 0.00209  | 0.031771 | 0.025739 | 7099/5585 | 10 |
| BP | GO:0032330 | regulation of chondrocyte differentiation                                 | 7/660  | 52/18866  | 0.002115 | 0.032058 | 0.025971 | 6591/8607 | 7  |
| BP | GO:1901214 | regulation of neuron death                                                | 22/660 | 321/18866 | 0.002177 | 0.032801 | 0.026573 | 7099/2911 | 22 |
| BP | GO:0008645 | hexose transmembrane transport                                            | 11/660 | 114/18866 | 0.002178 | 0.032801 | 0.026573 | 6041/2343 | 11 |
| BP | GO:0046326 | positive regulation of glucose import                                     | 6/660  | 39/18866  | 0.002184 | 0.032801 | 0.026573 | 6041/2343 | 6  |
| BP | GO:0051953 | negative regulation of amine transport                                    | 5/660  | 27/18866  | 0.002197 | 0.032911 | 0.026662 | 23208/269 | 5  |
| BP | GO:0042129 | regulation of T cell proliferation                                        | 14/660 | 167/18866 | 0.002252 | 0.033602 | 0.027222 | 7535/7292 | 14 |
| BP | GO:0048010 | vascular endothelial growth factor receptor signaling pathway             | 10/660 | 98/18866  | 0.002257 | 0.033602 | 0.027222 | 387/52967 | 10 |
| BP | GO:0050918 | positive chemotaxis                                                       | 8/660  | 67/18866  | 0.002274 | 0.033669 | 0.027276 | 7249/9037 | 8  |
| BP | GO:0072678 | T cell migration                                                          | 8/660  | 67/18866  | 0.002274 | 0.033669 | 0.027276 | 7535/6512 | 8  |
| BP | GO:0006650 | glycerophospholipid metabolic process                                     | 23/660 | 343/18866 | 0.00231  | 0.034095 | 0.027621 | 57515/515 | 23 |
| BP | GO:0003184 | pulmonary valve morphogenesis                                             | 4/660  | 17/18866  | 0.002455 | 0.035629 | 0.028864 | 4846/1827 | 4  |
| BP | GO:0006957 | complement activation, alternative pathway                                | 4/660  | 17/18866  | 0.002455 | 0.035629 | 0.028864 | 81494/307 | 4  |
| BP | GO:0010715 | regulation of extracellular matrix disassembly                            | 4/660  | 17/18866  | 0.002455 | 0.035629 | 0.028864 | 7040/4035 | 4  |
| BP | GO:0035855 | megakaryocyte development                                                 | 4/660  | 17/18866  | 0.002455 | 0.035629 | 0.028864 | 5305/4211 | 4  |
| BP | GO:0046068 | cGMP metabolic process                                                    | 4/660  | 17/18866  | 0.002455 | 0.035629 | 0.028864 | 5152/5136 | 4  |
| BP | GO:0008217 | regulation of blood pressure                                              | 15/660 | 187/18866 | 0.002456 | 0.035629 | 0.028864 | 10911/299 | 15 |
| BP | GO:0009187 | cyclic nucleotide metabolic process                                       | 6/660  | 40/18866  | 0.002494 | 0.035774 | 0.028981 | 5744/5152 | 6  |
| BP | GO:0030518 | intracellular steroid hormone receptor signaling pathway                  | 11/660 | 116/18866 | 0.002499 | 0.035774 | 0.028981 | 7337/8626 | 11 |
| BP | GO:0045428 | regulation of nitric oxide biosynthetic process                           | 8/660  | 68/18866  | 0.0025   | 0.035774 | 0.028981 | 7099/5740 | 8  |
| BP | GO:1904377 | positive regulation of protein localization to cytoplasm                  | 8/660  | 68/18866  | 0.0025   | 0.035774 | 0.028981 | 8878/1107 | 8  |
| BP | GO:1904888 | cranial skeletal system development                                       | 8/660  | 68/18866  | 0.0025   | 0.035774 | 0.028981 | 8626/7048 | 8  |
| BP | GO:0002449 | lymphocyte mediated immunity                                              | 24/660 | 366/18866 | 0.002511 | 0.035826 | 0.029024 | 7292/7040 | 24 |
| BP | GO:0008643 | carbohydrate transport                                                    | 13/660 | 151/18866 | 0.002524 | 0.035918 | 0.029098 | 11046/996 | 13 |

|    |            |                                                 |        |           |          |          |          |           |    |
|----|------------|-------------------------------------------------|--------|-----------|----------|----------|----------|-----------|----|
| BP | GO:0051402 | neuron apoptotic process                        | 18/660 | 245/18866 | 0.002541 | 0.036059 | 0.029212 | 8626/3877 | 18 |
| BP | GO:0002335 | mature B cell differentiation                   | 5/660  | 28/18866  | 0.002599 | 0.036777 | 0.029794 | 4242/9452 | 5  |
| BP | GO:1901343 | negative regulation of vasculature develop      | 16/660 | 207/18866 | 0.002607 | 0.03678  | 0.029797 | 54361/655 | 16 |
| BP | GO:0030099 | myeloid cell differentiation                    | 27/660 | 431/18866 | 0.002663 | 0.037331 | 0.030243 | 7099/7048 | 27 |
| BP | GO:0070372 | regulation of ERK1 and ERK2 cascade             | 21/660 | 306/18866 | 0.002671 | 0.037331 | 0.030243 | 10318/709 | 21 |
| BP | GO:0018107 | peptidyl-threonine phosphorylation              | 11/660 | 117/18866 | 0.002674 | 0.037331 | 0.030243 | 65125/840 | 11 |
| BP | GO:0002224 | toll-like receptor signaling pathway            | 13/660 | 152/18866 | 0.002675 | 0.037331 | 0.030243 | 10318/709 | 13 |
| BP | GO:0045766 | positive regulation of angiogenesis             | 16/660 | 208/18866 | 0.002735 | 0.038069 | 0.03084  | 7048/9037 | 16 |
| BP | GO:0031331 | positive regulation of cellular catabolic pro   | 25/660 | 390/18866 | 0.00279  | 0.038631 | 0.031296 | 678/10444 | 25 |
| BP | GO:0003158 | endothelium development                         | 12/660 | 135/18866 | 0.002798 | 0.038631 | 0.031296 | 6935/7132 | 12 |
| BP | GO:0030856 | regulation of epithelial cell differentiation   | 14/660 | 171/18866 | 0.0028   | 0.038631 | 0.031296 | 6935/8626 | 14 |
| BP | GO:0042102 | positive regulation of T cell proliferation     | 10/660 | 101/18866 | 0.002821 | 0.038631 | 0.031296 | 7535/7292 | 10 |
| BP | GO:0042116 | macrophage activation                           | 10/660 | 101/18866 | 0.002821 | 0.038631 | 0.031296 | 7099/2320 | 10 |
| BP | GO:0060191 | regulation of lipase activity                   | 10/660 | 101/18866 | 0.002821 | 0.038631 | 0.031296 | 387/5330/ | 10 |
| BP | GO:1905209 | positive regulation of cardiocyte differentia   | 6/660  | 41/18866  | 0.002837 | 0.038751 | 0.031393 | 7040/1051 | 6  |
| BP | GO:2000736 | regulation of stem cell differentiation         | 11/660 | 118/18866 | 0.002858 | 0.038931 | 0.031539 | 678/10512 | 11 |
| BP | GO:0030900 | forebrain development                           | 25/660 | 391/18866 | 0.002885 | 0.039199 | 0.031756 | 56949/543 | 25 |
| BP | GO:0034329 | cell junction assembly                          | 27/660 | 434/18866 | 0.00293  | 0.039702 | 0.032164 | 54361/799 | 27 |
| BP | GO:0022604 | regulation of cell morphogenesis                | 30/660 | 499/18866 | 0.00294  | 0.039735 | 0.032191 | 7337/2290 | 30 |
| BP | GO:0051250 | negative regulation of lymphocyte activatio     | 13/660 | 154/18866 | 0.002997 | 0.040318 | 0.032662 | 7292/6469 | 13 |
| BP | GO:0008088 | axo-dendritic transport                         | 8/660  | 70/18866  | 0.003005 | 0.040318 | 0.032662 | 22906/802 | 8  |
| BP | GO:0035265 | organ growth                                    | 15/660 | 191/18866 | 0.003007 | 0.040318 | 0.032662 | 7337/7048 | 15 |
| BP | GO:0060840 | artery development                              | 10/660 | 102/18866 | 0.003032 | 0.040526 | 0.032831 | 6469/5396 | 10 |
| BP | GO:0001655 | urogenital system development                   | 22/660 | 330/18866 | 0.003051 | 0.040526 | 0.032831 | 54361/733 | 22 |
| BP | GO:0045671 | negative regulation of osteoclast differentia   | 5/660  | 29/18866  | 0.003052 | 0.040526 | 0.032831 | 7099/5295 | 5  |
| BP | GO:0006491 | N-glycan processing                             | 4/660  | 18/18866  | 0.00307  | 0.040526 | 0.032831 | 7903/1125 | 4  |
| BP | GO:0006883 | cellular sodium ion homeostasis                 | 4/660  | 18/18866  | 0.00307  | 0.040526 | 0.032831 | 64699/655 | 4  |
| BP | GO:0010766 | negative regulation of sodium ion transport     | 4/660  | 18/18866  | 0.00307  | 0.040526 | 0.032831 | 65125/273 | 4  |
| BP | GO:0042509 | regulation of tyrosine phosphorylation of S     | 9/660  | 86/18866  | 0.003105 | 0.040773 | 0.033031 | 7132/3717 | 9  |
| BP | GO:0045445 | myoblast differentiation                        | 9/660  | 86/18866  | 0.003105 | 0.040773 | 0.033031 | 7040/6469 | 9  |
| BP | GO:0050679 | positive regulation of epithelial cell prolifer | 16/660 | 211/18866 | 0.003152 | 0.041231 | 0.033402 | 8626/7099 | 16 |
| BP | GO:0030183 | B cell differentiation                          | 12/660 | 137/18866 | 0.003159 | 0.041231 | 0.033402 | 678/6777/ | 12 |
| BP | GO:0006979 | response to oxidative stress                    | 28/660 | 458/18866 | 0.003164 | 0.041231 | 0.033402 | 11179/733 | 28 |
| BP | GO:1902903 | regulation of supramolecular fiber organiza     | 24/660 | 373/18866 | 0.003199 | 0.04159  | 0.033693 | 54361/508 | 24 |
| BP | GO:0001709 | cell fate determination                         | 6/660  | 42/18866  | 0.003214 | 0.041674 | 0.033762 | 5396/4208 | 6  |
| BP | GO:0048661 | positive regulation of smooth muscle cell p     | 10/660 | 103/18866 | 0.003256 | 0.042108 | 0.034113 | 7048/5159 | 10 |
| BP | GO:0001659 | temperature homeostasis                         | 14/660 | 174/18866 | 0.00328  | 0.042276 | 0.034249 | 9658/2309 | 14 |
| BP | GO:0002292 | T cell differentiation involved in immune rel   | 8/660  | 71/18866  | 0.003285 | 0.042276 | 0.034249 | 7292/6421 | 8  |

|    |            |                                               |        |           |          |          |          |           |    |
|----|------------|-----------------------------------------------|--------|-----------|----------|----------|----------|-----------|----|
| BP | GO:1901215 | negative regulation of neuron death           | 16/660 | 212/18866 | 0.003303 | 0.042335 | 0.034297 | 5176/3877 | 16 |
| BP | GO:0048638 | regulation of developmental growth            | 23/660 | 353/18866 | 0.003306 | 0.042335 | 0.034297 | 80351/704 | 23 |
| BP | GO:0018209 | peptidyl-serine modification                  | 22/660 | 333/18866 | 0.003402 | 0.043448 | 0.035198 | 65125/840 | 22 |
| BP | GO:2000181 | negative regulation of blood vessel morpho    | 15/660 | 194/18866 | 0.003484 | 0.044393 | 0.035964 | 54361/655 | 15 |
| BP | GO:0061082 | myeloid leukocyte cytokine production         | 5/660  | 30/18866  | 0.003558 | 0.045224 | 0.036637 | 7099/7040 | 5  |
| BP | GO:0045747 | positive regulation of Notch signaling path   | 7/660  | 57/18866  | 0.003598 | 0.045506 | 0.036866 | 8626/4846 | 7  |
| BP | GO:0061005 | cell differentiation involved in kidney devel | 7/660  | 57/18866  | 0.003598 | 0.045506 | 0.036866 | 54361/646 | 7  |
| BP | GO:0045773 | positive regulation of axon extension         | 6/660  | 43/18866  | 0.003627 | 0.045652 | 0.036984 | 8482/9037 | 6  |
| BP | GO:1901879 | regulation of protein depolymerization        | 9/660  | 88/18866  | 0.003628 | 0.045652 | 0.036984 | 50853/670 | 9  |
| BP | GO:1905475 | regulation of protein localization to membr   | 15/660 | 195/18866 | 0.003656 | 0.045902 | 0.037187 | 10490/862 | 15 |
| BP | GO:0050769 | positive regulation of neurogenesis           | 29/660 | 485/18866 | 0.003696 | 0.046107 | 0.037352 | 6935/2290 | 29 |
| BP | GO:0010811 | positive regulation of cell-substrate adhesi  | 11/660 | 122/18866 | 0.0037   | 0.046107 | 0.037352 | 54361/623 | 11 |
| BP | GO:0043244 | regulation of protein-containing complex d    | 11/660 | 122/18866 | 0.0037   | 0.046107 | 0.037352 | 50853/670 | 11 |
| BP | GO:0050729 | positive regulation of inflammatory respons   | 13/660 | 158/18866 | 0.003738 | 0.046457 | 0.037636 | 10318/729 | 13 |
| BP | GO:0032011 | ARF protein signal transduction               | 4/660  | 19/18866  | 0.003782 | 0.046457 | 0.037636 | 23362/109 | 4  |
| BP | GO:0032012 | regulation of ARF protein signal transducti   | 4/660  | 19/18866  | 0.003782 | 0.046457 | 0.037636 | 23362/109 | 4  |
| BP | GO:0051546 | keratinocyte migration                        | 4/660  | 19/18866  | 0.003782 | 0.046457 | 0.037636 | 10982/944 | 4  |
| BP | GO:0060438 | trachea development                           | 4/660  | 19/18866  | 0.003782 | 0.046457 | 0.037636 | 7048/6469 | 4  |
| BP | GO:0060973 | cell migration involved in heart developme    | 4/660  | 19/18866  | 0.003782 | 0.046457 | 0.037636 | 6591/1051 | 4  |
| BP | GO:1904018 | positive regulation of vasculature developm   | 17/660 | 235/18866 | 0.003863 | 0.047332 | 0.038345 | 7048/9037 | 17 |
| BP | GO:0007260 | tyrosine phosphorylation of STAT protein      | 9/660  | 89/18866  | 0.003914 | 0.047728 | 0.038666 | 7132/3717 | 9  |
| BP | GO:0055006 | cardiac cell development                      | 9/660  | 89/18866  | 0.003914 | 0.047728 | 0.038666 | 10611/515 | 9  |
| BP | GO:0048675 | axon extension                                | 11/660 | 123/18866 | 0.003938 | 0.047916 | 0.038818 | 8408/8020 | 11 |
| BP | GO:0051348 | negative regulation of transferase activity   | 20/660 | 296/18866 | 0.003969 | 0.048173 | 0.039027 | 65125/724 | 20 |
| BP | GO:2000379 | positive regulation of reactive oxygen spec   | 10/660 | 106/18866 | 0.004006 | 0.048506 | 0.039296 | 7099/7048 | 10 |
| BP | GO:0051897 | positive regulation of protein kinase B signa | 14/660 | 178/18866 | 0.004021 | 0.048579 | 0.039356 | 7040/9037 | 14 |
| BP | GO:0090257 | regulation of muscle system process           | 18/660 | 256/18866 | 0.004049 | 0.048748 | 0.039492 | 7132/3877 | 18 |
| BP | GO:0042088 | T-helper 1 type immune response               | 6/660  | 44/18866  | 0.004078 | 0.048748 | 0.039492 | 7292/7099 | 6  |
| BP | GO:0085029 | extracellular matrix assembly                 | 6/660  | 44/18866  | 0.004078 | 0.048748 | 0.039492 | 7040/2898 | 6  |
| BP | GO:2000404 | regulation of T cell migration                | 6/660  | 44/18866  | 0.004078 | 0.048748 | 0.039492 | 65125/273 | 6  |
| BP | GO:0060325 | face morphogenesis                            | 5/660  | 31/18866  | 0.004122 | 0.048748 | 0.039492 | 5156/5117 | 5  |
| BP | GO:1905476 | negative regulation of protein localization t | 5/660  | 31/18866  | 0.004122 | 0.048748 | 0.039492 | 7040/2343 | 5  |
| BP | GO:0002698 | negative regulation of immune effector prod   | 11/660 | 124/18866 | 0.004189 | 0.048748 | 0.039492 | 7292/7040 | 11 |
| BP | GO:0010633 | negative regulation of epithelial cell migrat | 11/660 | 124/18866 | 0.004189 | 0.048748 | 0.039492 | 7040/5176 | 11 |
| BP | GO:0062197 | cellular response to chemical stress          | 23/660 | 360/18866 | 0.004201 | 0.048748 | 0.039492 | 11179/709 | 23 |
| BP | GO:1903036 | positive regulation of response to woundin    | 8/660  | 74/18866  | 0.004249 | 0.048748 | 0.039492 | 7099/6239 | 8  |
| BP | GO:0001865 | NK T cell differentiation                     | 3/660  | 10/18866  | 0.004254 | 0.048748 | 0.039492 | 7048/3702 | 3  |
| BP | GO:0003149 | membranous septum morphogenesis               | 3/660  | 10/18866  | 0.004254 | 0.048748 | 0.039492 | 7048/8321 | 3  |

|    |            |                                               |        |           |          |          |          |           |    |
|----|------------|-----------------------------------------------|--------|-----------|----------|----------|----------|-----------|----|
| BP | GO:0006307 | DNA dealkylation involved in DNA repair       | 3/660  | 10/18866  | 0.004254 | 0.048748 | 0.039492 | 4350/7906 | 3  |
| BP | GO:0031943 | regulation of glucocorticoid metabolic pro    | 3/660  | 10/18866  | 0.004254 | 0.048748 | 0.039492 | 54361/956 | 3  |
| BP | GO:0034651 | cortisol biosynthetic process                 | 3/660  | 10/18866  | 0.004254 | 0.048748 | 0.039492 | 54361/956 | 3  |
| BP | GO:0045348 | positive regulation of MHC class II biosynth  | 3/660  | 10/18866  | 0.004254 | 0.048748 | 0.039492 | 7099/3717 | 3  |
| BP | GO:0045625 | regulation of T-helper 1 cell differentiation | 3/660  | 10/18866  | 0.004254 | 0.048748 | 0.039492 | 7292/3566 | 3  |
| BP | GO:0048251 | elastic fiber assembly                        | 3/660  | 10/18866  | 0.004254 | 0.048748 | 0.039492 | 4239/4054 | 3  |
| BP | GO:0060513 | prostatic bud formation                       | 3/660  | 10/18866  | 0.004254 | 0.048748 | 0.039492 | 8626/6469 | 3  |
| BP | GO:0071104 | response to interleukin-9                     | 3/660  | 10/18866  | 0.004254 | 0.048748 | 0.039492 | 6777/6776 | 3  |
| BP | GO:0071670 | smooth muscle cell chemotaxis                 | 3/660  | 10/18866  | 0.004254 | 0.048748 | 0.039492 | 5159/8031 | 3  |
| BP | GO:1902645 | tertiary alcohol biosynthetic process         | 3/660  | 10/18866  | 0.004254 | 0.048748 | 0.039492 | 54361/956 | 3  |
| BP | GO:2000786 | positive regulation of autophagosome asse     | 3/660  | 10/18866  | 0.004254 | 0.048748 | 0.039492 | 8408/5305 | 3  |
| BP | GO:0055017 | cardiac muscle tissue growth                  | 10/660 | 107/18866 | 0.004284 | 0.048982 | 0.039682 | 7048/1061 | 10 |
| BP | GO:0007568 | aging                                         | 21/660 | 319/18866 | 0.004331 | 0.049404 | 0.040024 | 11179/862 | 21 |
| BP | GO:0016050 | vesicle organization                          | 22/660 | 340/18866 | 0.004351 | 0.049528 | 0.040124 | 23325/104 | 22 |
| BP | GO:0001819 | positive regulation of cytokine production    | 27/660 | 447/18866 | 0.004363 | 0.049546 | 0.040138 | 7292/7099 | 27 |
| BP | GO:0043030 | regulation of macrophage activation           | 7/660  | 59/18866  | 0.004373 | 0.049555 | 0.040146 | 7099/2320 | 7  |
| CC | GO:0062023 | collagen-containing extracellular matrix      | 50/682 | 427/19559 | 5.90E-14 | 3.15E-11 | 2.71E-11 | 64856/644 | 50 |
| CC | GO:0045121 | membrane raft                                 | 34/682 | 329/19559 | 1.70E-08 | 3.27E-06 | 2.81E-06 | 7535/7132 | 34 |
| CC | GO:0098857 | membrane microdomain                          | 34/682 | 330/19559 | 1.84E-08 | 3.27E-06 | 2.81E-06 | 7535/7132 | 34 |
| CC | GO:0098589 | membrane region                               | 34/682 | 343/19559 | 4.77E-08 | 6.38E-06 | 5.49E-06 | 7535/7132 | 34 |
| CC | GO:0005925 | focal adhesion                                | 37/682 | 415/19559 | 1.88E-07 | 2.02E-05 | 1.73E-05 | 7791/2613 | 37 |
| CC | GO:0030055 | cell-substrate junction                       | 37/682 | 423/19559 | 3.03E-07 | 2.70E-05 | 2.32E-05 | 7791/2613 | 37 |
| CC | GO:0005901 | caveola                                       | 14/682 | 82/19559  | 8.44E-07 | 6.45E-05 | 5.55E-05 | 7048/7035 | 14 |
| CC | GO:0044853 | plasma membrane raft                          | 16/682 | 113/19559 | 1.91E-06 | 0.000128 | 0.00011  | 7048/7035 | 16 |
| CC | GO:0005788 | endoplasmic reticulum lumen                   | 28/682 | 308/19559 | 4.00E-06 | 0.000238 | 0.000205 | 54361/648 | 28 |
| CC | GO:0031091 | platelet alpha granule                        | 13/682 | 91/19559  | 1.58E-05 | 0.000844 | 0.000726 | 10490/704 | 13 |
| CC | GO:0005774 | vacuolar membrane                             | 32/682 | 427/19559 | 4.43E-05 | 0.002157 | 0.001855 | 10490/233 | 32 |
| CC | GO:0031093 | platelet alpha granule lumen                  | 10/682 | 67/19559  | 0.000102 | 0.004569 | 0.003928 | 10490/704 | 10 |
| CC | GO:0030017 | sarcomere                                     | 19/682 | 207/19559 | 0.000122 | 0.004794 | 0.004122 | 23345/887 | 19 |
| CC | GO:0005765 | lysosomal membrane                            | 28/682 | 375/19559 | 0.000139 | 0.004794 | 0.004122 | 10490/233 | 28 |
| CC | GO:0098852 | lytic vacuole membrane                        | 28/682 | 375/19559 | 0.000139 | 0.004794 | 0.004122 | 10490/233 | 28 |
| CC | GO:0030016 | myofibril                                     | 20/682 | 227/19559 | 0.000143 | 0.004794 | 0.004122 | 23345/887 | 20 |
| CC | GO:0009897 | external side of plasma membrane              | 30/682 | 417/19559 | 0.000157 | 0.004947 | 0.004253 | 7099/7048 | 30 |
| CC | GO:0042383 | sarcolemma                                    | 14/682 | 135/19559 | 0.000268 | 0.007589 | 0.006525 | 8082/6641 | 14 |
| CC | GO:0043292 | contractile fiber                             | 20/682 | 238/19559 | 0.00027  | 0.007589 | 0.006525 | 23345/887 | 20 |
| CC | GO:0031252 | cell leading edge                             | 29/682 | 421/19559 | 0.000413 | 0.011052 | 0.009503 | 79971/745 | 29 |
| CC | GO:0031941 | filamentous actin                             | 6/682  | 34/19559  | 0.001027 | 0.025799 | 0.022182 | 6525/5311 | 6  |
| CC | GO:0031089 | platelet dense granule lumen                  | 4/682  | 14/19559  | 0.001109 | 0.025799 | 0.022182 | 7078/3699 | 4  |

|    |            |                                               |        |           |          |          |          |           |    |
|----|------------|-----------------------------------------------|--------|-----------|----------|----------|----------|-----------|----|
| CC | GO:0033643 | host cell part                                | 4/682  | 14/19559  | 0.001109 | 0.025799 | 0.022182 | 5297/5196 | 4  |
| CC | GO:0031256 | leading edge membrane                         | 15/682 | 175/19559 | 0.00124  | 0.02764  | 0.023765 | 79971/555 | 15 |
| CC | GO:0030139 | endocytic vesicle                             | 22/682 | 313/19559 | 0.00153  | 0.03198  | 0.027497 | 7791/5436 | 22 |
| CC | GO:0001726 | ruffle                                        | 15/682 | 179/19559 | 0.001554 | 0.03198  | 0.027497 | 7456/7099 | 15 |
| CC | GO:0030018 | Z disc                                        | 12/682 | 128/19559 | 0.001743 | 0.03454  | 0.029698 | 6261/4660 | 12 |
| CC | GO:0005911 | cell-cell junction                            | 30/682 | 493/19559 | 0.002356 | 0.04373  | 0.0376   | 7791/7535 | 30 |
| CC | GO:0001725 | stress fiber                                  | 8/682  | 68/19559  | 0.002452 | 0.04373  | 0.0376   | 7791/9260 | 8  |
| CC | GO:0097517 | contractile actin filament bundle             | 8/682  | 68/19559  | 0.002452 | 0.04373  | 0.0376   | 7791/9260 | 8  |
| CC | GO:0045177 | apical part of cell                           | 27/682 | 433/19559 | 0.002725 | 0.046653 | 0.040112 | 27347/655 | 27 |
| CC | GO:0005884 | actin filament                                | 11/682 | 118/19559 | 0.00279  | 0.046653 | 0.040112 | 7456/6525 | 11 |
| MF | GO:0005201 | extracellular matrix structural constituent   | 24/649 | 169/18352 | 6.64E-09 | 5.39E-06 | 4.96E-06 | 64856/104 | 24 |
| MF | GO:0005539 | glycosaminoglycan binding                     | 25/649 | 232/18352 | 7.80E-07 | 0.000317 | 0.000291 | 7048/5557 | 25 |
| MF | GO:0004714 | transmembrane receptor protein tyrosine k     | 12/649 | 61/18352  | 1.23E-06 | 0.000333 | 0.000306 | 5157/5159 | 12 |
| MF | GO:0019199 | transmembrane receptor protein kinase act     | 13/649 | 80/18352  | 4.28E-06 | 0.000868 | 0.000798 | 7048/5157 | 13 |
| MF | GO:0004713 | protein tyrosine kinase activity              | 17/649 | 135/18352 | 5.70E-06 | 0.000926 | 0.000851 | 7535/5157 | 17 |
| MF | GO:0005520 | insulin-like growth factor binding            | 7/649  | 29/18352  | 5.30E-05 | 0.007168 | 0.006589 | 3685/3490 | 7  |
| MF | GO:0019838 | growth factor binding                         | 15/649 | 136/18352 | 9.51E-05 | 0.011029 | 0.010137 | 7048/5159 | 15 |
| MF | GO:0005161 | platelet-derived growth factor receptor bin   | 5/649  | 15/18352  | 0.000122 | 0.012357 | 0.011357 | 5159/5156 | 5  |
| MF | GO:1901681 | sulfur compound binding                       | 22/649 | 262/18352 | 0.000166 | 0.013555 | 0.012459 | 5270/9037 | 22 |
| MF | GO:0005518 | collagen binding                              | 10/649 | 70/18352  | 0.000167 | 0.013555 | 0.012459 | 5118/4060 | 10 |
| MF | GO:0008083 | growth factor activity                        | 16/649 | 162/18352 | 0.000208 | 0.015329 | 0.014089 | 7040/8031 | 16 |
| MF | GO:0043394 | proteoglycan binding                          | 7/649  | 36/18352  | 0.000228 | 0.015461 | 0.014211 | 9037/4035 | 7  |
| MF | GO:0008081 | phosphoric diester hydrolase activity         | 11/649 | 89/18352  | 0.000297 | 0.017377 | 0.015971 | 10924/661 | 11 |
| MF | GO:0001968 | fibronectin binding                           | 6/649  | 27/18352  | 0.0003   | 0.017377 | 0.015971 | 131578/36 | 6  |
| MF | GO:0097493 | structural molecule activity conferring elast | 4/649  | 11/18352  | 0.000419 | 0.022695 | 0.020859 | 3915/1051 | 4  |
| MF | GO:0017154 | semaphorin receptor activity                  | 4/649  | 12/18352  | 0.000611 | 0.0292   | 0.026838 | 10154/536 | 4  |
| MF | GO:0047555 | 3',5'-cyclic-GMP phosphodiesterase activity   | 4/649  | 12/18352  | 0.000611 | 0.0292   | 0.026838 | 5152/5137 | 4  |
| MF | GO:0031994 | insulin-like growth factor I binding          | 4/649  | 13/18352  | 0.000858 | 0.038725 | 0.035592 | 3685/3489 | 4  |
| MF | GO:0008201 | heparin binding                               | 15/649 | 169/18352 | 0.000998 | 0.041712 | 0.038338 | 5270/6159 | 15 |
| MF | GO:0030215 | semaphorin receptor binding                   | 5/649  | 23/18352  | 0.001079 | 0.041712 | 0.038338 | 8482/9037 | 5  |
| MF | GO:0050431 | transforming growth factor beta binding       | 5/649  | 23/18352  | 0.001079 | 0.041712 | 0.038338 | 7048/4054 | 5  |
| MF | GO:0004857 | enzyme inhibitor activity                     | 26/649 | 383/18352 | 0.001208 | 0.043343 | 0.039837 | 65125/106 | 26 |
| MF | GO:0048018 | receptor ligand activity                      | 31/649 | 487/18352 | 0.001228 | 0.043343 | 0.039837 | 54361/109 | 31 |
| MF | GO:0030546 | signaling receptor activator activity         | 31/649 | 492/18352 | 0.001443 | 0.048375 | 0.044462 | 54361/109 | 31 |
| MF | GO:0019902 | phosphatase binding                           | 16/649 | 194/18352 | 0.001498 | 0.048375 | 0.044462 | 65125/724 | 16 |
| MF | GO:0051371 | muscle alpha-actinin binding                  | 4/649  | 15/18352  | 0.001549 | 0.048375 | 0.044462 | 5311/9260 | 4  |

| Supplementary Table 3. Kyoto encyclopedia of genes and genomes pathway enrichment analysis of all metastases-related genes in GSE11121 |                                                   |           |          |          |          |          |                    |       |
|----------------------------------------------------------------------------------------------------------------------------------------|---------------------------------------------------|-----------|----------|----------|----------|----------|--------------------|-------|
| ID                                                                                                                                     | Description                                       | GeneRatio | BgRatio  | pvalue   | p.adjust | qvalue   | geneID             | Count |
| hsa03050                                                                                                                               | Proteasome                                        | 15/423    | 46/8108  | 5.20E-09 | 1.60E-06 | 1.51E-06 | SEM1/PSMD7/PSMD    | 15    |
| hsa04110                                                                                                                               | Cell cycle                                        | 22/423    | 124/8108 | 3.51E-07 | 5.40E-05 | 5.09E-05 | RBL1/RAD21/PTTG1/  | 22    |
| hsa05012                                                                                                                               | Parkinson disease                                 | 32/423    | 249/8108 | 1.79E-06 | 0.000173 | 0.000163 | VDAC3/UBB/TXN/SLC  | 32    |
| hsa05014                                                                                                                               | Amyotrophic lateral sclerosis                     | 41/423    | 365/8108 | 2.24E-06 | 0.000173 | 0.000163 | VAPB/TOMM40/SRSF   | 41    |
| hsa05010                                                                                                                               | Alzheimer disease                                 | 41/423    | 369/8108 | 2.96E-06 | 0.000183 | 0.000172 | WNT10B/VDAC3/SLC   | 41    |
| hsa05020                                                                                                                               | Prion disease                                     | 33/423    | 273/8108 | 4.81E-06 | 0.000247 | 0.000233 | VDAC3/SOD1/SLC25   | 33    |
| hsa05022                                                                                                                               | Pathways of neurodegeneration - multiple diseases | 48/423    | 476/8108 | 6.42E-06 | 0.000283 | 0.000267 | WNT10B/VDAC3/VA    | 48    |
| hsa05016                                                                                                                               | Huntington disease                                | 35/423    | 306/8108 | 8.61E-06 | 0.000331 | 0.000313 | VDAC3/TFAM/SOD1/   | 35    |
| hsa05017                                                                                                                               | Spinocerebellar ataxia                            | 19/423    | 143/8108 | 0.000149 | 0.004653 | 0.004389 | VDAC3/SLC25A5/SEN  | 19    |
| hsa04932                                                                                                                               | Non-alcoholic fatty liver disease                 | 20/423    | 155/8108 | 0.000151 | 0.004653 | 0.004389 | SDHA/NDUFS6/NDU    | 20    |
| hsa04610                                                                                                                               | Complement and coagulation cascades               | 15/359    | 85/8108  | 3.90E-06 | 0.001116 | 0.000875 | TFPI/SERPING1/SERP | 15    |
| hsa04151                                                                                                                               | PI3K-Akt signaling pathway                        | 34/359    | 354/8108 | 1.49E-05 | 0.002125 | 0.001666 | TSC2/TLR4/TCL1A/PK | 34    |
| hsa04510                                                                                                                               | Focal adhesion                                    | 23/359    | 201/8108 | 2.55E-05 | 0.002428 | 0.001903 | ZYX/RHOA/PPP1R12   | 23    |
| hsa05202                                                                                                                               | Transcriptional misregulation in cancer           | 22/359    | 192/8108 | 3.74E-05 | 0.002676 | 0.002098 | ZEB1/TRAF1/TGFBR2  | 22    |
| hsa04935                                                                                                                               | Growth hormone synthesis, secretion and action    | 16/359    | 119/8108 | 6.48E-05 | 0.003206 | 0.002514 | STAT5B/STAT5A/PLC  | 16    |
| hsa04659                                                                                                                               | Th17 cell differentiation                         | 15/359    | 107/8108 | 6.73E-05 | 0.003206 | 0.002514 | ZAP70/TGFBR2/TGFB  | 15    |
| hsa05205                                                                                                                               | Proteoglycans in cancer                           | 22/359    | 205/8108 | 0.000101 | 0.004132 | 0.003239 | WNT4/TLR4/TIMP3/T  | 22    |
| hsa04630                                                                                                                               | JAK-STAT signaling pathway                        | 18/359    | 162/8108 | 0.00028  | 0.010003 | 0.007842 | STAT5B/STAT5A/PIK3 | 18    |
| hsa05215                                                                                                                               | Prostate cancer                                   | 13/359    | 97/8108  | 0.000322 | 0.010245 | 0.008032 | ZEB1/PLAT/PIK3R2/P | 13    |
| hsa05145                                                                                                                               | Toxoplasmosis                                     | 14/359    | 112/8108 | 0.0004   | 0.011432 | 0.008962 | TNFRSF1A/TLR4/TGF  | 14    |
| hsa05321                                                                                                                               | Inflammatory bowel disease                        | 10/359    | 65/8108  | 0.000518 | 0.013475 | 0.010564 | TLR4/TGFB1/RORC/N  | 10    |
| hsa05164                                                                                                                               | Influenza A                                       | 18/359    | 172/8108 | 0.000582 | 0.013875 | 0.010877 | TPSB2/TPSAB1/TNFR  | 18    |
| hsa01521                                                                                                                               | EGFR tyrosine kinase inhibitor resistance         | 11/359    | 79/8108  | 0.000663 | 0.01426  | 0.011179 | PIK3R2/PIK3R1/PDGF | 11    |
| hsa04658                                                                                                                               | Th1 and Th2 cell differentiation                  | 12/359    | 92/8108  | 0.000698 | 0.01426  | 0.011179 | ZAP70/STAT5B/STAT  | 12    |
| hsa04360                                                                                                                               | Axon guidance                                     | 18/359    | 182/8108 | 0.001133 | 0.021593 | 0.016928 | WNT4/SHH/SEMA7A    | 18    |
| hsa04115                                                                                                                               | p53 signaling pathway                             | 10/359    | 73/8108  | 0.001314 | 0.022661 | 0.017766 | ZMAT3/TSC2/SESN1/  | 10    |
| hsa04640                                                                                                                               | Hematopoietic cell lineage                        | 12/359    | 99/8108  | 0.001347 | 0.022661 | 0.017766 | MS4A1/ITGA5/IL4R/H | 12    |
| hsa05142                                                                                                                               | Chagas disease                                    | 12/359    | 102/8108 | 0.001748 | 0.027774 | 0.021773 | TNFRSF1A/TLR4/TGF  | 12    |
| hsa04020                                                                                                                               | Calcium signaling pathway                         | 21/359    | 240/8108 | 0.002159 | 0.032341 | 0.025354 | RYR1/PLN/PLCB2/PD  | 21    |
| hsa05163                                                                                                                               | Human cytomegalovirus infection                   | 20/359    | 225/8108 | 0.002272 | 0.032341 | 0.025354 | TSC2/TNFRSF1A/TBK  | 20    |
| hsa04015                                                                                                                               | Rap1 signaling pathway                            | 19/359    | 210/8108 | 0.002375 | 0.032341 | 0.025354 | RHOA/PLCB2/PIK3R2  | 19    |
| hsa04371                                                                                                                               | Apelin signaling pathway                          | 14/359    | 138/8108 | 0.0031   | 0.0403   | 0.031593 | RYR1/PRKAB1/PLCB2  | 14    |



Supplementary Table 4. GO analysis of genes in the turquoise module

| ONTOLOGY | ID         | Description                                             | GeneRatio | BgRatio   | pvalue   | p.adjust | qvalue   | geneID    | Count |
|----------|------------|---------------------------------------------------------|-----------|-----------|----------|----------|----------|-----------|-------|
| BP       | GO:000070  | mitotic sister chromatid segregation                    | 34/545    | 161/18866 | 4.74E-20 | 2.11E-16 | 1.85E-16 | 11130/110 | 34    |
| BP       | GO:0140014 | mitotic nuclear division                                | 43/545    | 286/18866 | 4.91E-19 | 1.09E-15 | 9.57E-16 | 11130/110 | 43    |
| BP       | GO:0007059 | chromosome segregation                                  | 46/545    | 334/18866 | 1.00E-18 | 1.49E-15 | 1.30E-15 | 11130/110 | 46    |
| BP       | GO:0000819 | sister chromatid segregation                            | 35/545    | 196/18866 | 3.94E-18 | 4.39E-15 | 3.84E-15 | 11130/110 | 35    |
| BP       | GO:0051983 | regulation of chromosome segregation                    | 26/545    | 107/18866 | 3.14E-17 | 2.80E-14 | 2.45E-14 | 11065/931 | 26    |
| BP       | GO:1902850 | microtubule cytoskeleton organization involved in m     | 29/545    | 144/18866 | 1.07E-16 | 7.97E-14 | 6.98E-14 | 22974/104 | 29    |
| BP       | GO:0000280 | nuclear division                                        | 49/545    | 428/18866 | 1.62E-16 | 1.03E-13 | 9.05E-14 | 11130/110 | 49    |
| BP       | GO:0010965 | regulation of mitotic sister chromatid separation       | 20/545    | 61/18866  | 2.41E-16 | 1.34E-13 | 1.17E-13 | 11065/931 | 20    |
| BP       | GO:0010948 | negative regulation of cell cycle process               | 44/545    | 359/18866 | 4.96E-16 | 2.46E-13 | 2.15E-13 | 9319/5490 | 44    |
| BP       | GO:0048285 | organelle fission                                       | 51/545    | 476/18866 | 6.02E-16 | 2.46E-13 | 2.15E-13 | 11130/557 | 51    |
| BP       | GO:0033047 | regulation of mitotic sister chromatid segregation      | 21/545    | 72/18866  | 6.35E-16 | 2.46E-13 | 2.15E-13 | 11065/931 | 21    |
| BP       | GO:0051306 | mitotic sister chromatid separation                     | 20/545    | 64/18866  | 6.99E-16 | 2.46E-13 | 2.15E-13 | 11065/931 | 20    |
| BP       | GO:0098813 | nuclear chromosome segregation                          | 38/545    | 272/18866 | 7.16E-16 | 2.46E-13 | 2.15E-13 | 11130/110 | 38    |
| BP       | GO:1901990 | regulation of mitotic cell cycle phase transition       | 49/545    | 448/18866 | 1.02E-15 | 3.25E-13 | 2.85E-13 | 11065/931 | 49    |
| BP       | GO:1905818 | regulation of chromosome separation                     | 20/545    | 66/18866  | 1.37E-15 | 4.08E-13 | 3.57E-13 | 11065/931 | 20    |
| BP       | GO:0045930 | negative regulation of mitotic cell cycle               | 41/545    | 341/18866 | 9.99E-15 | 2.78E-12 | 2.44E-12 | 11130/931 | 41    |
| BP       | GO:0033045 | regulation of sister chromatid segregation              | 21/545    | 84/18866  | 1.95E-14 | 5.08E-12 | 4.44E-12 | 11065/931 | 21    |
| BP       | GO:0051304 | chromosome separation                                   | 22/545    | 94/18866  | 2.05E-14 | 5.08E-12 | 4.44E-12 | 11065/931 | 22    |
| BP       | GO:0007091 | metaphase/anaphase transition of mitotic cell cycle     | 18/545    | 58/18866  | 2.29E-14 | 5.38E-12 | 4.71E-12 | 11065/931 | 18    |
| BP       | GO:1901987 | regulation of cell cycle phase transition               | 49/545    | 486/18866 | 2.50E-14 | 5.51E-12 | 4.82E-12 | 11065/931 | 49    |
| BP       | GO:0007088 | regulation of mitotic nuclear division                  | 28/545    | 163/18866 | 2.59E-14 | 5.51E-12 | 4.82E-12 | 11065/931 | 28    |
| BP       | GO:0033046 | negative regulation of sister chromatid segregation     | 16/545    | 44/18866  | 3.73E-14 | 7.57E-12 | 6.62E-12 | 9319/5490 | 16    |
| BP       | GO:0044784 | metaphase/anaphase transition of cell cycle             | 18/545    | 60/18866  | 4.47E-14 | 8.66E-12 | 7.58E-12 | 11065/931 | 18    |
| BP       | GO:0051985 | negative regulation of chromosome segregation           | 16/545    | 45/18866  | 5.64E-14 | 1.05E-11 | 9.17E-12 | 9319/5490 | 16    |
| BP       | GO:1901991 | negative regulation of mitotic cell cycle phase transit | 34/545    | 251/18866 | 6.28E-14 | 1.12E-11 | 9.79E-12 | 9319/5490 | 34    |
| BP       | GO:1901988 | negative regulation of cell cycle phase transition      | 35/545    | 270/18866 | 1.01E-13 | 1.73E-11 | 1.52E-11 | 9319/5490 | 35    |
| BP       | GO:0051783 | regulation of nuclear division                          | 29/545    | 188/18866 | 1.58E-13 | 2.62E-11 | 2.29E-11 | 11065/931 | 29    |
| BP       | GO:0030071 | regulation of mitotic metaphase/anaphase transition     | 17/545    | 56/18866  | 1.83E-13 | 2.92E-11 | 2.55E-11 | 11065/931 | 17    |
| BP       | GO:0033048 | negative regulation of mitotic sister chromatid segre   | 15/545    | 42/18866  | 3.24E-13 | 4.97E-11 | 4.35E-11 | 9319/5490 | 15    |
| BP       | GO:1902099 | regulation of metaphase/anaphase transition of cell c   | 17/545    | 58/18866  | 3.50E-13 | 5.21E-11 | 4.56E-11 | 11065/931 | 17    |
| BP       | GO:0000086 | G2/M transition of mitotic cell cycle                   | 33/545    | 254/18866 | 4.89E-13 | 7.04E-11 | 6.16E-11 | 22974/687 | 33    |
| BP       | GO:0007051 | spindle organization                                    | 28/545    | 183/18866 | 5.14E-13 | 7.16E-11 | 6.27E-11 | 22974/104 | 28    |
| BP       | GO:0044839 | cell cycle G2/M phase transition                        | 34/545    | 273/18866 | 7.37E-13 | 9.95E-11 | 8.71E-11 | 22974/687 | 34    |
| BP       | GO:2000816 | negative regulation of mitotic sister chromatid separa  | 14/545    | 39/18866  | 1.86E-12 | 2.43E-10 | 2.13E-10 | 9319/5490 | 14    |
| BP       | GO:0031145 | anaphase-promoting complex-dependent catabolic          | 19/545    | 83/18866  | 1.91E-12 | 2.43E-10 | 2.13E-10 | 11065/923 | 19    |
| BP       | GO:1905819 | negative regulation of chromosome separation            | 14/545    | 40/18866  | 2.78E-12 | 3.44E-10 | 3.01E-10 | 9319/5490 | 14    |

|    |            |                                                        |        |           |          |          |          |           |    |
|----|------------|--------------------------------------------------------|--------|-----------|----------|----------|----------|-----------|----|
| BP | GO:0007052 | mitotic spindle organization                           | 22/545 | 118/18866 | 2.86E-12 | 3.45E-10 | 3.02E-10 | 22974/104 | 22 |
| BP | GO:0010389 | regulation of G2/M transition of mitotic cell cycle    | 28/545 | 200/18866 | 4.75E-12 | 5.58E-10 | 4.88E-10 | 22974/588 | 28 |
| BP | GO:1902749 | regulation of cell cycle G2/M phase transition         | 29/545 | 217/18866 | 6.40E-12 | 7.32E-10 | 6.40E-10 | 22974/588 | 29 |
| BP | GO:0010639 | negative regulation of organelle organization          | 41/545 | 416/18866 | 7.42E-12 | 8.27E-10 | 7.24E-10 | 9319/2297 | 41 |
| BP | GO:0051784 | negative regulation of nuclear division                | 16/545 | 60/18866  | 8.74E-12 | 9.51E-10 | 8.32E-10 | 9319/5490 | 16 |
| BP | GO:0045839 | negative regulation of mitotic nuclear division        | 15/545 | 52/18866  | 1.13E-11 | 1.19E-09 | 1.05E-09 | 9319/5490 | 15 |
| BP | GO:0045841 | negative regulation of mitotic metaphase/anaphase t    | 12/545 | 36/18866  | 1.99E-10 | 2.07E-08 | 1.81E-08 | 9319/5490 | 12 |
| BP | GO:1902750 | negative regulation of cell cycle G2/M phase transitio | 19/545 | 108/18866 | 2.52E-10 | 2.55E-08 | 2.23E-08 | 5885/5713 | 19 |
| BP | GO:0070507 | regulation of microtubule cytoskeleton organization    | 25/545 | 190/18866 | 2.60E-10 | 2.57E-08 | 2.25E-08 | 22974/104 | 25 |
| BP | GO:1902100 | negative regulation of metaphase/anaphase transitio    | 12/545 | 37/18866  | 2.87E-10 | 2.78E-08 | 2.44E-08 | 9319/5490 | 12 |
| BP | GO:0032886 | regulation of microtubule-based process                | 27/545 | 240/18866 | 1.75E-09 | 1.64E-07 | 1.44E-07 | 22974/104 | 27 |
| BP | GO:2001251 | negative regulation of chromosome organization         | 21/545 | 148/18866 | 1.77E-09 | 1.64E-07 | 1.44E-07 | 9319/7153 | 21 |
| BP | GO:0010972 | negative regulation of G2/M transition of mitotic cell | 17/545 | 96/18866  | 2.00E-09 | 1.82E-07 | 1.59E-07 | 5885/5713 | 17 |
| BP | GO:0033044 | regulation of chromosome organization                  | 33/545 | 356/18866 | 4.13E-09 | 3.68E-07 | 3.22E-07 | 11065/931 | 33 |
| BP | GO:0000075 | cell cycle checkpoint                                  | 24/545 | 219/18866 | 2.35E-08 | 2.06E-06 | 1.80E-06 | 11130/931 | 24 |
| BP | GO:0007094 | mitotic spindle assembly checkpoint                    | 10/545 | 34/18866  | 2.62E-08 | 2.12E-06 | 1.86E-06 | 9319/5490 | 10 |
| BP | GO:0031577 | spindle checkpoint                                     | 10/545 | 34/18866  | 2.62E-08 | 2.12E-06 | 1.86E-06 | 9319/5490 | 10 |
| BP | GO:0071173 | spindle assembly checkpoint                            | 10/545 | 34/18866  | 2.62E-08 | 2.12E-06 | 1.86E-06 | 9319/5490 | 10 |
| BP | GO:0071174 | mitotic spindle checkpoint                             | 10/545 | 34/18866  | 2.62E-08 | 2.12E-06 | 1.86E-06 | 9319/5490 | 10 |
| BP | GO:0006260 | DNA replication                                        | 27/545 | 273/18866 | 2.82E-08 | 2.25E-06 | 1.97E-06 | 6241/5984 | 27 |
| BP | GO:0040001 | establishment of mitotic spindle localization          | 10/545 | 35/18866  | 3.57E-08 | 2.79E-06 | 2.44E-06 | 54908/534 | 10 |
| BP | GO:0007093 | mitotic cell cycle checkpoint                          | 20/545 | 166/18866 | 7.26E-08 | 5.58E-06 | 4.89E-06 | 11130/931 | 20 |
| BP | GO:0006261 | DNA-dependent DNA replication                          | 19/545 | 151/18866 | 7.66E-08 | 5.79E-06 | 5.06E-06 | 5984/5983 | 19 |
| BP | GO:0006270 | DNA replication initiation                             | 10/545 | 39/18866  | 1.11E-07 | 8.28E-06 | 7.25E-06 | 23594/499 | 10 |
| BP | GO:0000910 | cytokinesis                                            | 20/545 | 172/18866 | 1.31E-07 | 9.60E-06 | 8.40E-06 | 3925/1080 | 20 |
| BP | GO:1902036 | regulation of hematopoietic stem cell differentiation  | 13/545 | 73/18866  | 1.49E-07 | 1.07E-05 | 9.40E-06 | 5713/5708 | 13 |
| BP | GO:0051225 | spindle assembly                                       | 16/545 | 115/18866 | 2.02E-07 | 1.43E-05 | 1.25E-05 | 22974/106 | 16 |
| BP | GO:0061418 | regulation of transcription from RNA polymerase II p   | 13/545 | 77/18866  | 2.86E-07 | 1.97E-05 | 1.73E-05 | 5713/5708 | 13 |
| BP | GO:2000736 | regulation of stem cell differentiation                | 16/545 | 118/18866 | 2.90E-07 | 1.97E-05 | 1.73E-05 | 5713/5708 | 16 |
| BP | GO:0000082 | G1/S transition of mitotic cell cycle                  | 26/545 | 287/18866 | 2.92E-07 | 1.97E-05 | 1.73E-05 | 7298/6241 | 26 |
| BP | GO:0008608 | attachment of spindle microtubules to kinetochore      | 9/545  | 34/18866  | 3.61E-07 | 2.40E-05 | 2.10E-05 | 10615/291 | 9  |
| BP | GO:0051293 | establishment of spindle localization                  | 10/545 | 45/18866  | 4.79E-07 | 3.14E-05 | 2.75E-05 | 54908/534 | 10 |
| BP | GO:0071103 | DNA conformation change                                | 29/545 | 355/18866 | 5.40E-07 | 3.49E-05 | 3.05E-05 | 7153/1104 | 29 |
| BP | GO:1903046 | meiotic cell cycle process                             | 20/545 | 193/18866 | 8.54E-07 | 5.44E-05 | 4.76E-05 | 9319/7153 | 20 |
| BP | GO:0048002 | antigen processing and presentation of peptide antic   | 20/545 | 194/18866 | 9.27E-07 | 5.80E-05 | 5.07E-05 | 29127/571 | 20 |
| BP | GO:0002478 | antigen processing and presentation of exogenous p     | 19/545 | 177/18866 | 9.36E-07 | 5.80E-05 | 5.07E-05 | 29127/571 | 19 |
| BP | GO:1901532 | regulation of hematopoietic progenitor cell differenti | 13/545 | 86/18866  | 1.07E-06 | 6.50E-05 | 5.69E-05 | 5713/5708 | 13 |
| BP | GO:0061640 | cytoskeleton-dependent cytokinesis                     | 14/545 | 100/18866 | 1.08E-06 | 6.50E-05 | 5.69E-05 | 3925/1080 | 14 |

|    |            |                                                      |        |           |          |          |          |           |    |
|----|------------|------------------------------------------------------|--------|-----------|----------|----------|----------|-----------|----|
| BP | GO:0019882 | antigen processing and presentation                  | 22/545 | 232/18866 | 1.11E-06 | 6.62E-05 | 5.79E-05 | 54915/291 | 22 |
| BP | GO:0060218 | hematopoietic stem cell differentiation              | 13/545 | 87/18866  | 1.23E-06 | 7.19E-05 | 6.29E-05 | 5713/5708 | 13 |
| BP | GO:0044843 | cell cycle G1/S phase transition                     | 26/545 | 310/18866 | 1.28E-06 | 7.39E-05 | 6.47E-05 | 7298/6241 | 26 |
| BP | GO:0051653 | spindle localization                                 | 10/545 | 50/18866  | 1.35E-06 | 7.74E-05 | 6.77E-05 | 54908/534 | 10 |
| BP | GO:0000132 | establishment of mitotic spindle orientation         | 8/545  | 30/18866  | 1.54E-06 | 8.68E-05 | 7.60E-05 | 54908/534 | 8  |
| BP | GO:0045787 | positive regulation of cell cycle                    | 30/545 | 396/18866 | 1.67E-06 | 9.19E-05 | 8.04E-05 | 11065/106 | 30 |
| BP | GO:0006521 | regulation of cellular amino acid metabolic process  | 11/545 | 63/18866  | 1.67E-06 | 9.19E-05 | 8.04E-05 | 5713/5708 | 11 |
| BP | GO:0019884 | antigen processing and presentation of exogenous a   | 19/545 | 185/18866 | 1.83E-06 | 9.96E-05 | 8.71E-05 | 29127/571 | 19 |
| BP | GO:0010499 | proteasomal ubiquitin-independent protein catabolic  | 7/545  | 22/18866  | 1.89E-06 | 0.000101 | 8.88E-05 | 5695/5691 | 7  |
| BP | GO:0043488 | regulation of mRNA stability                         | 19/545 | 186/18866 | 1.99E-06 | 0.000105 | 9.22E-05 | 54915/110 | 19 |
| BP | GO:0051302 | regulation of cell division                          | 18/545 | 171/18866 | 2.40E-06 | 0.000126 | 0.00011  | 5933/2912 | 18 |
| BP | GO:0090068 | positive regulation of cell cycle process            | 25/545 | 302/18866 | 2.58E-06 | 0.000134 | 0.000117 | 11065/106 | 25 |
| BP | GO:0071456 | cellular response to hypoxia                         | 20/545 | 208/18866 | 2.76E-06 | 0.000141 | 0.000124 | 57103/571 | 20 |
| BP | GO:1903311 | regulation of mRNA metabolic process                 | 27/545 | 344/18866 | 2.85E-06 | 0.000144 | 0.000126 | 54915/110 | 27 |
| BP | GO:0043618 | regulation of transcription from RNA polymerase II p | 14/545 | 109/18866 | 3.09E-06 | 0.000155 | 0.000135 | 5713/5708 | 14 |
| BP | GO:0033238 | regulation of cellular amine metabolic process       | 12/545 | 81/18866  | 3.45E-06 | 0.000171 | 0.00015  | 55737/571 | 12 |
| BP | GO:0140013 | meiotic nuclear division                             | 18/545 | 177/18866 | 3.92E-06 | 0.000192 | 0.000168 | 9319/7153 | 18 |
| BP | GO:0043487 | regulation of RNA stability                          | 19/545 | 195/18866 | 4.01E-06 | 0.000194 | 0.00017  | 54915/110 | 19 |
| BP | GO:0051321 | meiotic cell cycle                                   | 22/545 | 254/18866 | 4.97E-06 | 0.000237 | 0.000208 | 9319/7153 | 22 |
| BP | GO:0071453 | cellular response to oxygen levels                   | 21/545 | 235/18866 | 5.00E-06 | 0.000237 | 0.000208 | 57103/571 | 21 |
| BP | GO:0036294 | cellular response to decreased oxygen levels         | 20/545 | 218/18866 | 5.64E-06 | 0.000265 | 0.000232 | 57103/571 | 20 |
| BP | GO:0034502 | protein localization to chromosome                   | 12/545 | 85/18866  | 5.78E-06 | 0.000268 | 0.000235 | 54908/588 | 12 |
| BP | GO:0043620 | regulation of DNA-templated transcription in respon  | 14/545 | 115/18866 | 5.85E-06 | 0.000269 | 0.000235 | 5713/5708 | 14 |
| BP | GO:0000281 | mitotic cytokinesis                                  | 11/545 | 72/18866  | 6.48E-06 | 0.000295 | 0.000258 | 3925/2912 | 11 |
| BP | GO:0051294 | establishment of spindle orientation                 | 8/545  | 36/18866  | 6.83E-06 | 0.000307 | 0.000269 | 54908/534 | 8  |
| BP | GO:0042770 | signal transduction in response to DNA damage        | 15/545 | 133/18866 | 7.09E-06 | 0.000316 | 0.000277 | 9100/5695 | 15 |
| BP | GO:0070498 | interleukin-1-mediated signaling pathway             | 13/545 | 103/18866 | 8.41E-06 | 0.000371 | 0.000325 | 7444/8767 | 13 |
| BP | GO:0051310 | metaphase plate congression                          | 10/545 | 61/18866  | 8.94E-06 | 0.000391 | 0.000342 | 54908/106 | 10 |
| BP | GO:0002479 | antigen processing and presentation of exogenous p   | 11/545 | 75/18866  | 9.72E-06 | 0.000421 | 0.000368 | 5713/5708 | 11 |
| BP | GO:0061013 | regulation of mRNA catabolic process                 | 19/545 | 208/18866 | 1.02E-05 | 0.000439 | 0.000384 | 54915/110 | 19 |
| BP | GO:0032465 | regulation of cytokinesis                            | 12/545 | 90/18866  | 1.06E-05 | 0.000446 | 0.00039  | 29127/905 | 12 |
| BP | GO:0002244 | hematopoietic progenitor cell differentiation        | 17/545 | 172/18866 | 1.06E-05 | 0.000446 | 0.00039  | 7153/5713 | 17 |
| BP | GO:0072331 | signal transduction by p53 class mediator            | 22/545 | 267/18866 | 1.10E-05 | 0.000459 | 0.000402 | 9100/2297 | 22 |
| BP | GO:0000727 | double-strand break repair via break-induced replica | 5/545  | 12/18866  | 1.32E-05 | 0.000546 | 0.000478 | 4175/4174 | 5  |
| BP | GO:0001736 | establishment of planar polarity                     | 14/545 | 124/18866 | 1.41E-05 | 0.000566 | 0.000495 | 5713/5708 | 14 |
| BP | GO:0007164 | establishment of tissue polarity                     | 14/545 | 124/18866 | 1.41E-05 | 0.000566 | 0.000495 | 5713/5708 | 14 |
| BP | GO:0061982 | meiosis I cell cycle process                         | 14/545 | 124/18866 | 1.41E-05 | 0.000566 | 0.000495 | 9319/7153 | 14 |
| BP | GO:0030010 | establishment of cell polarity                       | 15/545 | 141/18866 | 1.45E-05 | 0.000576 | 0.000504 | 54908/235 | 15 |

|    |            |                                                         |        |           |          |          |          |           |    |
|----|------------|---------------------------------------------------------|--------|-----------|----------|----------|----------|-----------|----|
| BP | GO:0090307 | mitotic spindle assembly                                | 10/545 | 65/18866  | 1.60E-05 | 0.000626 | 0.000548 | 22974/291 | 10 |
| BP | GO:0050000 | chromosome localization                                 | 11/545 | 79/18866  | 1.62E-05 | 0.000626 | 0.000548 | 54908/106 | 11 |
| BP | GO:0051303 | establishment of chromosome localization                | 11/545 | 79/18866  | 1.62E-05 | 0.000626 | 0.000548 | 54908/106 | 11 |
| BP | GO:0043161 | proteasome-mediated ubiquitin-dependent protein         | 29/545 | 424/18866 | 1.77E-05 | 0.00068  | 0.000595 | 11060/110 | 29 |
| BP | GO:0042590 | antigen processing and presentation of exogenous p      | 11/545 | 80/18866  | 1.82E-05 | 0.000695 | 0.000608 | 5713/5708 | 11 |
| BP | GO:1901796 | regulation of signal transduction by p53 class mediat   | 17/545 | 180/18866 | 1.93E-05 | 0.000729 | 0.000638 | 22974/687 | 17 |
| BP | GO:0001738 | morphogenesis of a polarized epithelium                 | 15/545 | 145/18866 | 2.02E-05 | 0.000752 | 0.000658 | 23513/571 | 15 |
| BP | GO:0000209 | protein polyubiquitination                              | 25/545 | 340/18866 | 2.02E-05 | 0.000752 | 0.000658 | 11060/733 | 25 |
| BP | GO:0051988 | regulation of attachment of spindle microtubules to k   | 5/545  | 13/18866  | 2.10E-05 | 0.000773 | 0.000676 | 10615/291 | 5  |
| BP | GO:0044106 | cellular amine metabolic process                        | 14/545 | 131/18866 | 2.64E-05 | 0.000963 | 0.000843 | 55737/571 | 14 |
| BP | GO:0051261 | protein depolymerization                                | 13/545 | 115/18866 | 2.80E-05 | 0.001016 | 0.000889 | 22974/392 | 13 |
| BP | GO:0071459 | protein localization to chromosome, centromeric reg     | 6/545  | 22/18866  | 2.84E-05 | 0.001022 | 0.000894 | 54908/104 | 6  |
| BP | GO:0034508 | centromere complex assembly                             | 9/545  | 56/18866  | 2.96E-05 | 0.001057 | 0.000925 | 54069/553 | 9  |
| BP | GO:0045931 | positive regulation of mitotic cell cycle               | 16/545 | 168/18866 | 3.04E-05 | 0.001076 | 0.000941 | 11065/590 | 16 |
| BP | GO:0032392 | DNA geometric change                                    | 13/545 | 116/18866 | 3.07E-05 | 0.001079 | 0.000944 | 7153/5984 | 13 |
| BP | GO:0031109 | microtubule polymerization or depolymerization          | 13/545 | 117/18866 | 3.37E-05 | 0.001173 | 0.001027 | 22974/392 | 13 |
| BP | GO:0006304 | DNA modification                                        | 13/545 | 120/18866 | 4.41E-05 | 0.001523 | 0.001333 | 8493/4609 | 13 |
| BP | GO:0007019 | microtubule depolymerization                            | 8/545  | 46/18866  | 4.57E-05 | 0.001566 | 0.001371 | 22974/392 | 8  |
| BP | GO:0051315 | attachment of mitotic spindle microtubules to kineto    | 5/545  | 15/18866  | 4.66E-05 | 0.001587 | 0.001389 | 10403/106 | 5  |
| BP | GO:0001666 | response to hypoxia                                     | 25/545 | 359/18866 | 4.97E-05 | 0.00168  | 0.00147  | 57103/571 | 25 |
| BP | GO:0007080 | mitotic metaphase plate congression                     | 8/545  | 47/18866  | 5.37E-05 | 0.001789 | 0.001565 | 54908/104 | 8  |
| BP | GO:0000083 | regulation of transcription involved in G1/S transition | 7/545  | 35/18866  | 5.38E-05 | 0.001789 | 0.001565 | 7298/6241 | 7  |
| BP | GO:0009308 | amine metabolic process                                 | 14/545 | 140/18866 | 5.53E-05 | 0.001827 | 0.001599 | 55737/571 | 14 |
| BP | GO:0006310 | DNA recombination                                       | 22/545 | 299/18866 | 6.23E-05 | 0.002042 | 0.001787 | 9319/7153 | 22 |
| BP | GO:0051656 | establishment of organelle localization                 | 28/545 | 432/18866 | 6.36E-05 | 0.002071 | 0.001812 | 83696/549 | 28 |
| BP | GO:0060071 | Wnt signaling pathway, planar cell polarity pathway     | 12/545 | 108/18866 | 6.71E-05 | 0.002169 | 0.001898 | 5713/5708 | 12 |
| BP | GO:0007163 | establishment or maintenance of cell polarity           | 18/545 | 220/18866 | 7.50E-05 | 0.002395 | 0.002096 | 54908/235 | 18 |
| BP | GO:0010212 | response to ionizing radiation                          | 14/545 | 144/18866 | 7.53E-05 | 0.002395 | 0.002096 | 57103/843 | 14 |
| BP | GO:0031146 | SCF-dependent proteasomal ubiquitin-dependent p         | 11/545 | 93/18866  | 7.58E-05 | 0.002395 | 0.002096 | 5713/5708 | 11 |
| BP | GO:0090175 | regulation of establishment of planar polarity          | 12/545 | 110/18866 | 8.04E-05 | 0.002497 | 0.002185 | 5713/5708 | 12 |
| BP | GO:0006302 | double-strand break repair                              | 20/545 | 262/18866 | 8.04E-05 | 0.002497 | 0.002185 | 7336/9319 | 20 |
| BP | GO:0016579 | protein deubiquitination                                | 21/545 | 283/18866 | 8.06E-05 | 0.002497 | 0.002185 | 9100/6472 | 21 |
| BP | GO:0036293 | response to decreased oxygen levels                     | 25/545 | 371/18866 | 8.44E-05 | 0.002595 | 0.002271 | 57103/571 | 25 |
| BP | GO:0048863 | stem cell differentiation                               | 20/545 | 264/18866 | 8.93E-05 | 0.002727 | 0.002386 | 6949/6664 | 20 |
| BP | GO:0090224 | regulation of spindle organization                      | 7/545  | 38/18866  | 9.36E-05 | 0.002822 | 0.002469 | 22974/104 | 7  |
| BP | GO:0070482 | response to oxygen levels                               | 26/545 | 396/18866 | 9.37E-05 | 0.002822 | 0.002469 | 57103/571 | 26 |
| BP | GO:0044786 | cell cycle DNA replication                              | 9/545  | 65/18866  | 9.93E-05 | 0.002972 | 0.0026   | 5984/5983 | 9  |
| BP | GO:2001020 | regulation of response to DNA damage stimulus           | 18/545 | 226/18866 | 0.000106 | 0.003144 | 0.002752 | 7336/5710 | 18 |

|    |            |                                                               |        |           |          |          |          |           |    |
|----|------------|---------------------------------------------------------------|--------|-----------|----------|----------|----------|-----------|----|
| BP | GO:0009314 | response to radiation                                         | 28/545 | 447/18866 | 0.000114 | 0.003368 | 0.002947 | 7295/5710 | 28 |
| BP | GO:0090263 | positive regulation of canonical Wnt signaling pathway        | 14/545 | 150/18866 | 0.000117 | 0.003433 | 0.003004 | 55737/571 | 14 |
| BP | GO:0034501 | protein localization to kinetochore                           | 5/545  | 18/18866  | 0.000124 | 0.003609 | 0.003158 | 54908/104 | 5  |
| BP | GO:0010565 | regulation of cellular ketone metabolic process               | 16/545 | 189/18866 | 0.000125 | 0.003617 | 0.003165 | 5713/5708 | 16 |
| BP | GO:0002474 | antigen processing and presentation of peptide antigen        | 11/545 | 99/18866  | 0.000134 | 0.003856 | 0.003374 | 5713/5708 | 11 |
| BP | GO:0006520 | cellular amino acid metabolic process                         | 23/545 | 340/18866 | 0.000152 | 0.004335 | 0.003793 | 6472/5713 | 23 |
| BP | GO:0072528 | pyrimidine-containing compound biosynthetic process           | 7/545  | 41/18866  | 0.000155 | 0.004394 | 0.003845 | 54963/729 | 7  |
| BP | GO:0007127 | meiosis I                                                     | 12/545 | 119/18866 | 0.000172 | 0.00484  | 0.004235 | 9319/7153 | 12 |
| BP | GO:0010498 | proteasomal protein catabolic process                         | 29/545 | 483/18866 | 0.000179 | 0.005023 | 0.004395 | 11060/110 | 29 |
| BP | GO:0070646 | protein modification by small protein removal                 | 21/545 | 300/18866 | 0.000182 | 0.00508  | 0.004445 | 9100/6472 | 21 |
| BP | GO:0051262 | protein tetramerization                                       | 10/545 | 87/18866  | 0.000203 | 0.005614 | 0.004913 | 7083/6472 | 10 |
| BP | GO:0071824 | protein-DNA complex subunit organization                      | 20/545 | 282/18866 | 0.000217 | 0.005972 | 0.005226 | 6882/4609 | 20 |
| BP | GO:0045840 | positive regulation of mitotic nuclear division               | 8/545  | 57/18866  | 0.000219 | 0.00599  | 0.005242 | 11065/590 | 8  |
| BP | GO:0006323 | DNA packaging                                                 | 18/545 | 240/18866 | 0.000224 | 0.006041 | 0.005286 | 7153/1104 | 18 |
| BP | GO:0006221 | pyrimidine nucleotide biosynthetic process                    | 6/545  | 31/18866  | 0.000225 | 0.006041 | 0.005286 | 54963/729 | 6  |
| BP | GO:0007143 | female meiotic nuclear division                               | 6/545  | 31/18866  | 0.000225 | 0.006041 | 0.005286 | 9319/7153 | 6  |
| BP | GO:0000723 | telomere maintenance                                          | 14/545 | 161/18866 | 0.000247 | 0.00655  | 0.005731 | 55183/598 | 14 |
| BP | GO:0031570 | DNA integrity checkpoint                                      | 14/545 | 161/18866 | 0.000247 | 0.00655  | 0.005731 | 7153/5810 | 14 |
| BP | GO:0065004 | protein-DNA complex assembly                                  | 18/545 | 243/18866 | 0.000261 | 0.006894 | 0.006033 | 6882/5406 | 18 |
| BP | GO:0006913 | nucleocytoplasmic transport                                   | 23/545 | 354/18866 | 0.000272 | 0.007138 | 0.006246 | 7307/7295 | 23 |
| BP | GO:0032508 | DNA duplex unwinding                                          | 11/545 | 108/18866 | 0.000291 | 0.007579 | 0.006632 | 7153/5984 | 11 |
| BP | GO:0051169 | nuclear transport                                             | 23/545 | 357/18866 | 0.000307 | 0.007956 | 0.006962 | 7307/7295 | 23 |
| BP | GO:0051984 | positive regulation of chromosome segregation                 | 6/545  | 33/18866  | 0.000322 | 0.008302 | 0.007265 | 5885/9700 | 6  |
| BP | GO:0006220 | pyrimidine nucleotide metabolic process                       | 7/545  | 46/18866  | 0.000325 | 0.008334 | 0.007293 | 54963/729 | 7  |
| BP | GO:0009896 | positive regulation of catabolic process                      | 27/545 | 454/18866 | 0.000345 | 0.008763 | 0.007668 | 54915/110 | 27 |
| BP | GO:0051383 | kinetochore organization                                      | 5/545  | 22/18866  | 0.000346 | 0.008763 | 0.007668 | 10403/978 | 5  |
| BP | GO:0045132 | meiotic chromosome segregation                                | 10/545 | 93/18866  | 0.000351 | 0.00884  | 0.007736 | 9319/7153 | 10 |
| BP | GO:0046785 | microtubule polymerization                                    | 9/545  | 77/18866  | 0.000369 | 0.009244 | 0.008089 | 22974/392 | 9  |
| BP | GO:0031055 | chromatin remodeling at centromere                            | 7/545  | 47/18866  | 0.000373 | 0.009285 | 0.008125 | 54069/553 | 7  |
| BP | GO:0060236 | regulation of mitotic spindle organization                    | 6/545  | 34/18866  | 0.000382 | 0.009455 | 0.008274 | 22974/104 | 6  |
| BP | GO:0002223 | stimulatory C-type lectin receptor signaling pathway          | 11/545 | 113/18866 | 0.000431 | 0.010604 | 0.009279 | 5713/5708 | 11 |
| BP | GO:0070555 | response to interleukin-1                                     | 16/545 | 211/18866 | 0.000437 | 0.010693 | 0.009357 | 7444/9100 | 16 |
| BP | GO:0009262 | deoxyribonucleotide metabolic process                         | 6/545  | 35/18866  | 0.00045  | 0.010954 | 0.009585 | 7298/6241 | 6  |
| BP | GO:1904666 | regulation of ubiquitin protein ligase activity               | 5/545  | 24/18866  | 0.000532 | 0.012784 | 0.011187 | 11065/534 | 5  |
| BP | GO:0044728 | DNA methylation or demethylation                              | 10/545 | 98/18866  | 0.000535 | 0.012784 | 0.011187 | 8493/4609 | 10 |
| BP | GO:0048732 | gland development                                             | 26/545 | 443/18866 | 0.000538 | 0.012784 | 0.011187 | 7298/2351 | 26 |
| BP | GO:0002220 | innate immune response activating cell surface receptor       | 11/545 | 116/18866 | 0.000539 | 0.012784 | 0.011187 | 5713/5708 | 11 |
| BP | GO:0043242 | negative regulation of protein-containing complex disassembly | 9/545  | 81/18866  | 0.000539 | 0.012784 | 0.011187 | 22974/971 | 9  |

|    |            |                                                        |        |           |          |          |          |           |    |
|----|------------|--------------------------------------------------------|--------|-----------|----------|----------|----------|-----------|----|
| BP | GO:0032200 | telomere organization                                  | 14/545 | 174/18866 | 0.000544 | 0.012843 | 0.011239 | 55183/598 | 14 |
| BP | GO:0002758 | innate immune response-activating signal transducti    | 11/545 | 117/18866 | 0.000579 | 0.013597 | 0.011898 | 5713/5708 | 11 |
| BP | GO:0042180 | cellular ketone metabolic process                      | 18/545 | 260/18866 | 0.000588 | 0.013714 | 0.012001 | 5713/5708 | 18 |
| BP | GO:1902904 | negative regulation of supramolecular fiber organiza   | 13/545 | 156/18866 | 0.000611 | 0.01419  | 0.012417 | 22974/916 | 13 |
| BP | GO:0006338 | chromatin remodeling                                   | 16/545 | 218/18866 | 0.000624 | 0.014409 | 0.012609 | 7019/4609 | 16 |
| BP | GO:0032984 | protein-containing complex disassembly                 | 21/545 | 330/18866 | 0.000649 | 0.014855 | 0.012999 | 22974/392 | 21 |
| BP | GO:0036010 | protein localization to endosome                       | 5/545  | 25/18866  | 0.00065  | 0.014855 | 0.012999 | 55737/235 | 5  |
| BP | GO:0000724 | double-strand break repair via homologous recomb       | 12/545 | 138/18866 | 0.000672 | 0.015281 | 0.013372 | 55183/940 | 12 |
| BP | GO:0051054 | positive regulation of DNA metabolic process           | 15/545 | 200/18866 | 0.000731 | 0.01654  | 0.014474 | 57103/551 | 15 |
| BP | GO:0000079 | regulation of cyclin-dependent protein serine/threon   | 10/545 | 102/18866 | 0.000735 | 0.016541 | 0.014475 | 5347/2356 | 10 |
| BP | GO:0000725 | recombinational repair                                 | 12/545 | 140/18866 | 0.000764 | 0.017047 | 0.014917 | 55183/940 | 12 |
| BP | GO:0031110 | regulation of microtubule polymerization or depolym    | 9/545  | 85/18866  | 0.000769 | 0.017047 | 0.014917 | 22974/392 | 9  |
| BP | GO:0072527 | pyrimidine-containing compound metabolic process       | 9/545  | 85/18866  | 0.000769 | 0.017047 | 0.014917 | 54963/729 | 9  |
| BP | GO:0006336 | DNA replication-independent nucleosome assembly        | 7/545  | 53/18866  | 0.000787 | 0.017373 | 0.015203 | 54069/553 | 7  |
| BP | GO:1905330 | regulation of morphogenesis of an epithelium           | 14/545 | 181/18866 | 0.000805 | 0.017668 | 0.015461 | 5713/5708 | 14 |
| BP | GO:0031111 | negative regulation of microtubule polymerization or   | 6/545  | 39/18866  | 0.00082  | 0.017914 | 0.015676 | 22974/392 | 6  |
| BP | GO:0043244 | regulation of protein-containing complex disassemb     | 11/545 | 122/18866 | 0.000824 | 0.017916 | 0.015678 | 22974/971 | 11 |
| BP | GO:0043624 | cellular protein complex disassembly                   | 16/545 | 224/18866 | 0.000835 | 0.018077 | 0.015819 | 22974/392 | 16 |
| BP | GO:0045732 | positive regulation of protein catabolic process       | 16/545 | 225/18866 | 0.000876 | 0.018864 | 0.016507 | 11060/557 | 16 |
| BP | GO:0034724 | DNA replication-independent nucleosome organizati      | 7/545  | 54/18866  | 0.000882 | 0.01891  | 0.016548 | 54069/553 | 7  |
| BP | GO:0030177 | positive regulation of Wnt signaling pathway           | 14/545 | 183/18866 | 0.000896 | 0.019015 | 0.016639 | 55737/571 | 14 |
| BP | GO:0071347 | cellular response to interleukin-1                     | 14/545 | 183/18866 | 0.000896 | 0.019015 | 0.016639 | 7444/9100 | 14 |
| BP | GO:0051494 | negative regulation of cytoskeleton organization       | 13/545 | 163/18866 | 0.000922 | 0.019437 | 0.017009 | 22974/916 | 13 |
| BP | GO:0015949 | nucleobase-containing small molecule interconversid    | 5/545  | 27/18866  | 0.000941 | 0.019437 | 0.017009 | 7298/6241 | 5  |
| BP | GO:0090090 | negative regulation of canonical Wnt signaling pathw   | 14/545 | 184/18866 | 0.000944 | 0.019437 | 0.017009 | 5713/5708 | 14 |
| BP | GO:0006268 | DNA unwinding involved in DNA replication              | 4/545  | 16/18866  | 0.00095  | 0.019437 | 0.017009 | 9401/4175 | 4  |
| BP | GO:0007076 | mitotic chromosome condensation                        | 4/545  | 16/18866  | 0.00095  | 0.019437 | 0.017009 | 11044/512 | 4  |
| BP | GO:0009263 | deoxyribonucleotide biosynthetic process               | 4/545  | 16/18866  | 0.00095  | 0.019437 | 0.017009 | 7298/6241 | 4  |
| BP | GO:0060576 | intestinal epithelial cell development                 | 4/545  | 16/18866  | 0.00095  | 0.019437 | 0.017009 | 7298/5710 | 4  |
| BP | GO:0099116 | tRNA 5'-end processing                                 | 4/545  | 16/18866  | 0.00095  | 0.019437 | 0.017009 | 6741/1079 | 4  |
| BP | GO:0002218 | activation of innate immune response                   | 12/545 | 144/18866 | 0.000979 | 0.019737 | 0.017271 | 5713/5708 | 12 |
| BP | GO:0014068 | positive regulation of phosphatidylinositol 3-kinase s | 9/545  | 88/18866  | 0.000988 | 0.019737 | 0.017271 | 5747/5467 | 9  |
| BP | GO:1901879 | regulation of protein depolymerization                 | 9/545  | 88/18866  | 0.000988 | 0.019737 | 0.017271 | 22974/265 | 9  |
| BP | GO:0051785 | positive regulation of nuclear division                | 8/545  | 71/18866  | 0.000991 | 0.019737 | 0.017271 | 11065/590 | 8  |
| BP | GO:1901880 | negative regulation of protein depolymerization        | 8/545  | 71/18866  | 0.000991 | 0.019737 | 0.017271 | 22974/265 | 8  |
| BP | GO:1904029 | regulation of cyclin-dependent protein kinase activit  | 10/545 | 106/18866 | 0.000992 | 0.019737 | 0.017271 | 5347/2356 | 10 |
| BP | GO:0051052 | regulation of DNA metabolic process                    | 22/545 | 365/18866 | 0.000998 | 0.019764 | 0.017295 | 7644/7336 | 22 |
| BP | GO:0008637 | apoptotic mitochondrial changes                        | 11/545 | 125/18866 | 0.001008 | 0.019878 | 0.017395 | 55737/292 | 11 |

|    |            |                                                         |        |           |          |          |          |           |    |
|----|------------|---------------------------------------------------------|--------|-----------|----------|----------|----------|-----------|----|
| BP | GO:0071168 | protein localization to chromatin                       | 5/545  | 28/18866  | 0.001119 | 0.021979 | 0.019233 | 5885/5347 | 5  |
| BP | GO:0014066 | regulation of phosphatidylinositol 3-kinase signaling   | 11/545 | 127/18866 | 0.001148 | 0.022449 | 0.019645 | 5747/5467 | 11 |
| BP | GO:0043044 | ATP-dependent chromatin remodeling                      | 9/545  | 90/18866  | 0.001161 | 0.022608 | 0.019784 | 54069/553 | 9  |
| BP | GO:2000027 | regulation of animal organ morphogenesis                | 17/545 | 254/18866 | 0.001198 | 0.023213 | 0.020313 | 5713/5708 | 17 |
| BP | GO:0006305 | DNA alkylation                                          | 8/545  | 74/18866  | 0.001302 | 0.025026 | 0.021899 | 8493/4609 | 8  |
| BP | GO:0006306 | DNA methylation                                         | 8/545  | 74/18866  | 0.001302 | 0.025026 | 0.021899 | 8493/4609 | 8  |
| BP | GO:0042176 | regulation of protein catabolic process                 | 23/545 | 397/18866 | 0.001309 | 0.025041 | 0.021912 | 11060/557 | 23 |
| BP | GO:1901989 | positive regulation of cell cycle phase transition      | 10/545 | 110/18866 | 0.001318 | 0.025113 | 0.021976 | 11065/262 | 10 |
| BP | GO:0045089 | positive regulation of innate immune response           | 15/545 | 213/18866 | 0.001383 | 0.026138 | 0.022873 | 5713/5708 | 15 |
| BP | GO:0034080 | CENP-A containing nucleosome assembly                   | 6/545  | 43/18866  | 0.00139  | 0.026138 | 0.022873 | 54069/553 | 6  |
| BP | GO:0061641 | CENP-A containing chromatin organization                | 6/545  | 43/18866  | 0.00139  | 0.026138 | 0.022873 | 54069/553 | 6  |
| BP | GO:0051170 | import into nucleus                                     | 13/545 | 171/18866 | 0.001429 | 0.026766 | 0.023422 | 6637/1020 | 13 |
| BP | GO:0035567 | non-canonical Wnt signaling pathway                     | 12/545 | 151/18866 | 0.001476 | 0.027535 | 0.024095 | 5713/5708 | 12 |
| BP | GO:0051289 | protein homotetramerization                             | 7/545  | 59/18866  | 0.001502 | 0.027893 | 0.024408 | 7083/6472 | 7  |
| BP | GO:0051782 | negative regulation of cell division                    | 4/545  | 18/18866  | 0.001526 | 0.028236 | 0.024709 | 23594/460 | 4  |
| BP | GO:0051642 | centrosome localization                                 | 5/545  | 30/18866  | 0.001548 | 0.028508 | 0.024946 | 4085/2989 | 5  |
| BP | GO:0009124 | nucleoside monophosphate biosynthetic process           | 6/545  | 44/18866  | 0.00157  | 0.028809 | 0.02521  | 54963/729 | 6  |
| BP | GO:0033209 | tumor necrosis factor-mediated signaling pathway        | 13/545 | 173/18866 | 0.001587 | 0.028991 | 0.025369 | 5713/5708 | 13 |
| BP | GO:0033260 | nuclear DNA replication                                 | 7/545  | 60/18866  | 0.001658 | 0.030177 | 0.026406 | 5984/5983 | 7  |
| BP | GO:0097711 | ciliary basal body-plasma membrane docking              | 9/545  | 95/18866  | 0.001702 | 0.030848 | 0.026994 | 10733/534 | 9  |
| BP | GO:0071897 | DNA biosynthetic process                                | 14/545 | 196/18866 | 0.001726 | 0.031157 | 0.027264 | 9100/7298 | 14 |
| BP | GO:0062012 | regulation of small molecule metabolic process          | 25/545 | 456/18866 | 0.001766 | 0.031742 | 0.027776 | 57103/111 | 25 |
| BP | GO:0009394 | 2'-deoxyribonucleotide metabolic process                | 5/545  | 31/18866  | 0.001802 | 0.03211  | 0.028098 | 7298/4521 | 5  |
| BP | GO:0061842 | microtubule organizing center localization              | 5/545  | 31/18866  | 0.001802 | 0.03211  | 0.028098 | 4085/2989 | 5  |
| BP | GO:0022613 | ribonucleoprotein complex biogenesis                    | 26/545 | 482/18866 | 0.001808 | 0.03211  | 0.028098 | 96764/663 | 26 |
| BP | GO:0030178 | negative regulation of Wnt signaling pathway            | 15/545 | 219/18866 | 0.001818 | 0.032164 | 0.028145 | 5713/5708 | 15 |
| BP | GO:0006271 | DNA strand elongation involved in DNA replication       | 4/545  | 19/18866  | 0.00189  | 0.033037 | 0.02891  | 5984/5983 | 4  |
| BP | GO:0033189 | response to vitamin A                                   | 4/545  | 19/18866  | 0.00189  | 0.033037 | 0.02891  | 7298/5467 | 4  |
| BP | GO:0046653 | tetrahydrofolate metabolic process                      | 4/545  | 19/18866  | 0.00189  | 0.033037 | 0.02891  | 7298/6472 | 4  |
| BP | GO:0002831 | regulation of response to biotic stimulus               | 23/545 | 409/18866 | 0.001923 | 0.033489 | 0.029305 | 57103/876 | 23 |
| BP | GO:0031023 | microtubule organizing center organization              | 11/545 | 136/18866 | 0.001994 | 0.034591 | 0.03027  | 6491/5902 | 11 |
| BP | GO:0045143 | homologous chromosome segregation                       | 7/545  | 62/18866  | 0.00201  | 0.034731 | 0.030392 | 9319/5885 | 7  |
| BP | GO:0008380 | RNA splicing                                            | 26/545 | 487/18866 | 0.002084 | 0.035622 | 0.031172 | 7307/9676 | 26 |
| BP | GO:0017038 | protein import                                          | 14/545 | 200/18866 | 0.002084 | 0.035622 | 0.031172 | 10452/914 | 14 |
| BP | GO:0097421 | liver regeneration                                      | 5/545  | 32/18866  | 0.002086 | 0.035622 | 0.031172 | 7298/5781 | 5  |
| BP | GO:0007062 | sister chromatid cohesion                               | 7/545  | 63/18866  | 0.002206 | 0.037537 | 0.032848 | 11044/588 | 7  |
| BP | GO:0000377 | RNA splicing, via transesterification reactions with bu | 22/545 | 390/18866 | 0.002299 | 0.038674 | 0.033842 | 7307/9676 | 22 |
| BP | GO:0000398 | mRNA splicing, via spliceosome                          | 22/545 | 390/18866 | 0.002299 | 0.038674 | 0.033842 | 7307/9676 | 22 |

|    |            |                                                           |        |           |          |          |          |           |    |
|----|------------|-----------------------------------------------------------|--------|-----------|----------|----------|----------|-----------|----|
| BP | GO:0031331 | positive regulation of cellular catabolic process         | 22/545 | 390/18866 | 0.002299 | 0.038674 | 0.033842 | 54915/557 | 22 |
| BP | GO:0032495 | response to muramyl dipeptide                             | 4/545  | 20/18866  | 0.002309 | 0.038694 | 0.033859 | 8767/1432 | 4  |
| BP | GO:0019692 | deoxyribose phosphate metabolic process                   | 5/545  | 33/18866  | 0.0024   | 0.040079 | 0.035072 | 7298/4521 | 5  |
| BP | GO:0002066 | columnar/cuboidal epithelial cell development             | 7/545  | 64/18866  | 0.002417 | 0.040199 | 0.035177 | 7298/5710 | 7  |
| BP | GO:0009113 | purine nucleobase biosynthetic process                    | 3/545  | 10/18866  | 0.002472 | 0.040666 | 0.035586 | 6472/5631 | 3  |
| BP | GO:0035999 | tetrahydrofolate interconversion                          | 3/545  | 10/18866  | 0.002472 | 0.040666 | 0.035586 | 7298/6472 | 3  |
| BP | GO:0051231 | spindle elongation                                        | 3/545  | 10/18866  | 0.002472 | 0.040666 | 0.035586 | 29127/905 | 3  |
| BP | GO:2001252 | positive regulation of chromosome organization            | 13/545 | 182/18866 | 0.002486 | 0.040752 | 0.035661 | 55183/588 | 13 |
| BP | GO:0000375 | RNA splicing, via transesterification reactions           | 22/545 | 393/18866 | 0.002524 | 0.041224 | 0.036074 | 7307/9676 | 22 |
| BP | GO:0001889 | liver development                                         | 11/545 | 141/18866 | 0.002649 | 0.0431   | 0.037715 | 7298/5469 | 11 |
| BP | GO:0002065 | columnar/cuboidal epithelial cell differentiation         | 10/545 | 121/18866 | 0.002686 | 0.043547 | 0.038106 | 7298/5710 | 10 |
| BP | GO:0002833 | positive regulation of response to biotic stimulus        | 16/545 | 251/18866 | 0.002697 | 0.043568 | 0.038125 | 8767/5713 | 16 |
| BP | GO:2001021 | negative regulation of response to DNA damage stim        | 8/545  | 83/18866  | 0.002721 | 0.043789 | 0.038318 | 55183/262 | 8  |
| BP | GO:0050852 | T cell receptor signaling pathway                         | 14/545 | 206/18866 | 0.002734 | 0.043841 | 0.038364 | 8767/5713 | 14 |
| BP | GO:0042558 | pteridine-containing compound metabolic process           | 5/545  | 34/18866  | 0.002748 | 0.043916 | 0.03843  | 7298/6472 | 5  |
| BP | GO:0034471 | ncRNA 5'-end processing                                   | 4/545  | 21/18866  | 0.002788 | 0.044382 | 0.038838 | 6741/1079 | 4  |
| BP | GO:1903706 | regulation of hemopoiesis                                 | 26/545 | 498/18866 | 0.002819 | 0.044729 | 0.039141 | 9092/8767 | 26 |
| BP | GO:0002495 | antigen processing and presentation of peptide antigen    | 9/545  | 103/18866 | 0.00297  | 0.046957 | 0.04109  | 29127/379 | 9  |
| BP | GO:0061008 | hepaticobiliary system development                        | 11/545 | 144/18866 | 0.003119 | 0.048985 | 0.042865 | 7298/5469 | 11 |
| BP | GO:0034470 | ncRNA processing                                          | 22/545 | 400/18866 | 0.003125 | 0.048985 | 0.042865 | 11044/674 | 22 |
| BP | GO:0010259 | multicellular organism aging                              | 5/545  | 35/18866  | 0.003132 | 0.048985 | 0.042865 | 8438/4726 | 5  |
| BP | GO:0002504 | antigen processing and presentation of peptide or protein | 9/545  | 104/18866 | 0.003171 | 0.049423 | 0.043249 | 29127/379 | 9  |
| BP | GO:0006402 | mRNA catabolic process                                    | 21/545 | 376/18866 | 0.003213 | 0.049915 | 0.043679 | 54915/110 | 21 |
| CC | GO:0005819 | spindle                                                   | 52/559 | 367/19559 | 8.57E-22 | 4.85E-19 | 4.17E-19 | 55689/229 | 52 |
| CC | GO:0098687 | chromosomal region                                        | 48/559 | 350/19559 | 1.38E-19 | 3.90E-17 | 3.35E-17 | 11130/674 | 48 |
| CC | GO:0000775 | chromosome, centromeric region                            | 33/559 | 196/19559 | 1.70E-16 | 2.67E-14 | 2.29E-14 | 11130/549 | 33 |
| CC | GO:0000776 | kinetochore                                               | 28/559 | 137/19559 | 1.89E-16 | 2.67E-14 | 2.29E-14 | 11130/549 | 28 |
| CC | GO:0000779 | condensed chromosome, centromeric region                  | 26/559 | 122/19559 | 7.77E-16 | 8.79E-14 | 7.56E-14 | 11130/549 | 26 |
| CC | GO:0072686 | mitotic spindle                                           | 26/559 | 133/19559 | 7.06E-15 | 6.66E-13 | 5.72E-13 | 55689/229 | 26 |
| CC | GO:0000777 | condensed chromosome kinetochore                          | 22/559 | 106/19559 | 2.36E-13 | 1.91E-11 | 1.64E-11 | 11130/549 | 22 |
| CC | GO:0000793 | condensed chromosome                                      | 31/559 | 222/19559 | 2.77E-13 | 1.96E-11 | 1.68E-11 | 11130/715 | 31 |
| CC | GO:0000922 | spindle pole                                              | 26/559 | 165/19559 | 1.40E-12 | 8.80E-11 | 7.56E-11 | 22974/104 | 26 |
| CC | GO:0051233 | spindle midzone                                           | 12/559 | 36/19559  | 1.77E-10 | 1.00E-08 | 8.60E-09 | 55183/291 | 12 |
| CC | GO:0005876 | spindle microtubule                                       | 13/559 | 66/19559  | 3.77E-08 | 1.94E-06 | 1.67E-06 | 220134/90 | 13 |
| CC | GO:0030496 | midbody                                                   | 21/559 | 182/19559 | 6.15E-08 | 2.90E-06 | 2.49E-06 | 10615/798 | 21 |
| CC | GO:0000502 | proteasome complex                                        | 12/559 | 63/19559  | 1.87E-07 | 8.13E-06 | 6.98E-06 | 5713/5708 | 12 |
| CC | GO:0005874 | microtubule                                               | 33/559 | 431/19559 | 3.15E-07 | 1.27E-05 | 1.09E-05 | 80086/229 | 33 |
| CC | GO:1905369 | endopeptidase complex                                     | 12/559 | 69/19559  | 5.27E-07 | 1.99E-05 | 1.71E-05 | 5713/5708 | 12 |



|    |            |                                                      |        |           |          |          |          |           |    |
|----|------------|------------------------------------------------------|--------|-----------|----------|----------|----------|-----------|----|
| CC | GO:0005839 | proteasome core complex                              | 7/559  | 20/19559  | 8.41E-07 | 2.98E-05 | 2.56E-05 | 5695/5691 | 7  |
| CC | GO:1905368 | peptidase complex                                    | 13/559 | 92/19559  | 2.09E-06 | 6.96E-05 | 5.98E-05 | 5713/5708 | 13 |
| CC | GO:0000780 | condensed nuclear chromosome, centromeric region     | 8/559  | 32/19559  | 2.43E-06 | 7.64E-05 | 6.57E-05 | 5885/5347 | 8  |
| CC | GO:0000781 | chromosome, telomeric region                         | 16/559 | 164/19559 | 1.99E-05 | 0.000592 | 0.000509 | 6741/5518 | 16 |
| CC | GO:0000940 | condensed chromosome outer kinetochore               | 5/559  | 14/19559  | 3.03E-05 | 0.000816 | 0.000701 | 54908/220 | 5  |
| CC | GO:1990023 | mitotic spindle midzone                              | 5/559  | 14/19559  | 3.03E-05 | 0.000816 | 0.000701 | 9055/1469 | 5  |
| CC | GO:0032153 | cell division site                                   | 10/559 | 72/19559  | 3.66E-05 | 0.000942 | 0.000809 | 10801/589 | 10 |
| CC | GO:0000778 | condensed nuclear chromosome kinetochore             | 5/559  | 17/19559  | 8.71E-05 | 0.002145 | 0.001843 | 5347/1040 | 5  |
| CC | GO:0005635 | nuclear envelope                                     | 29/559 | 473/19559 | 0.000105 | 0.00248  | 0.002131 | 7444/1104 | 29 |
| CC | GO:0032154 | cleavage furrow                                      | 8/559  | 54/19559  | 0.000138 | 0.003133 | 0.002692 | 5898/2912 | 8  |
| CC | GO:0000794 | condensed nuclear chromosome                         | 11/559 | 103/19559 | 0.000175 | 0.003623 | 0.003113 | 5885/5810 | 11 |
| CC | GO:0097431 | mitotic spindle pole                                 | 6/559  | 30/19559  | 0.000176 | 0.003623 | 0.003113 | 10615/848 | 6  |
| CC | GO:0000235 | astral microtubule                                   | 4/559  | 11/19559  | 0.000186 | 0.003623 | 0.003113 | 22919/146 | 4  |
| CC | GO:0005818 | aster                                                | 4/559  | 11/19559  | 0.000186 | 0.003623 | 0.003113 | 22919/146 | 4  |
| CC | GO:0000784 | nuclear chromosome, telomeric region                 | 12/559 | 124/19559 | 0.00023  | 0.004335 | 0.003724 | 6741/5591 | 12 |
| CC | GO:0005686 | U2 snRNP                                             | 5/559  | 24/19559  | 0.000507 | 0.009262 | 0.007958 | 6637/6629 | 5  |
| CC | GO:0005871 | kinesin complex                                      | 7/559  | 51/19559  | 0.000584 | 0.010324 | 0.00887  | 3833/3797 | 7  |
| CC | GO:0005643 | nuclear pore                                         | 9/559  | 85/19559  | 0.000713 | 0.012235 | 0.010512 | 5902/8480 | 9  |
| CC | GO:0001650 | fibrillar center                                     | 11/559 | 129/19559 | 0.001199 | 0.019966 | 0.017155 | 6949/6629 | 11 |
| CC | GO:0005681 | spliceosomal complex                                 | 14/559 | 192/19559 | 0.001288 | 0.020833 | 0.0179   | 7307/6637 | 14 |
| CC | GO:0005684 | U2-type spliceosomal complex                         | 9/559  | 93/19559  | 0.001363 | 0.021433 | 0.018415 | 6637/6631 | 9  |
| CC | GO:0120114 | Sm-like protein family complex                       | 10/559 | 114/19559 | 0.001598 | 0.024452 | 0.02101  | 96764/663 | 10 |
| CC | GO:0090543 | Flemming body                                        | 5/559  | 31/19559  | 0.00172  | 0.025617 | 0.02201  | 5898/2912 | 5  |
| CC | GO:0005875 | microtubule associated complex                       | 12/559 | 159/19559 | 0.002094 | 0.03039  | 0.026111 | 3833/3797 | 12 |
| CC | GO:0030532 | small nuclear ribonucleoprotein complex              | 9/559  | 102/19559 | 0.002591 | 0.035308 | 0.030337 | 96764/663 | 9  |
| CC | GO:1990752 | microtubule end                                      | 5/559  | 34/19559  | 0.002625 | 0.035308 | 0.030337 | 10615/229 | 5  |
| CC | GO:0061695 | transferase complex, transferring phosphorus-contain | 16/559 | 253/19559 | 0.002633 | 0.035308 | 0.030337 | 6873/6882 | 16 |
| CC | GO:0005838 | proteasome regulatory particle                       | 4/559  | 21/19559  | 0.002682 | 0.035308 | 0.030337 | 5713/5708 | 4  |
| CC | GO:0016607 | nuclear speck                                        | 22/559 | 401/19559 | 0.002843 | 0.036478 | 0.031343 | 7307/1091 | 22 |
| CC | GO:0071005 | U2-type precatalytic spliceosome                     | 6/559  | 50/19559  | 0.0029   | 0.036478 | 0.031343 | 6637/6629 | 6  |
| CC | GO:0001725 | stress fiber                                         | 7/559  | 68/19559  | 0.003224 | 0.038061 | 0.032702 | 10801/574 | 7  |
| CC | GO:0097517 | contractile actin filament bundle                    | 7/559  | 68/19559  | 0.003224 | 0.038061 | 0.032702 | 10801/574 | 7  |
| CC | GO:0019774 | proteasome core complex, beta-subunit complex        | 3/559  | 11/19559  | 0.003228 | 0.038061 | 0.032702 | 5695/5691 | 3  |
| CC | GO:0035371 | microtubule plus-end                                 | 4/559  | 23/19559  | 0.003794 | 0.043355 | 0.037252 | 10615/229 | 4  |
| CC | GO:0071011 | precatalytic spliceosome                             | 6/559  | 53/19559  | 0.0039   | 0.043355 | 0.037252 | 6637/6629 | 6  |
| CC | GO:0005657 | replication fork                                     | 7/559  | 71/19559  | 0.004111 | 0.043355 | 0.037252 | 5984/5983 | 7  |
| CC | GO:0042555 | MCM complex                                          | 3/559  | 12/19559  | 0.004213 | 0.043355 | 0.037252 | 4175/4174 | 3  |
| CC | GO:0044615 | nuclear pore nuclear basket                          | 3/559  | 12/19559  | 0.004213 | 0.043355 | 0.037252 | 4085/5694 | 3  |

|    |            |                                                         |        |           |          |          |          |           |    |
|----|------------|---------------------------------------------------------|--------|-----------|----------|----------|----------|-----------|----|
| CC | GO:0071564 | npBAF complex                                           | 3/559  | 12/19559  | 0.004213 | 0.043355 | 0.037252 | 86/6595/8 | 3  |
| CC | GO:0072687 | meiotic spindle                                         | 3/559  | 12/19559  | 0.004213 | 0.043355 | 0.037252 | 26271/798 | 3  |
| CC | GO:0022624 | proteasome accessory complex                            | 4/559  | 24/19559  | 0.004451 | 0.044985 | 0.038652 | 5713/5708 | 4  |
| MF | GO:0015631 | tubulin binding                                         | 34/547 | 365/18352 | 4.59E-09 | 3.35E-06 | 3.15E-06 | 9217/2297 | 34 |
| MF | GO:0008017 | microtubule binding                                     | 27/547 | 265/18352 | 2.85E-08 | 1.04E-05 | 9.77E-06 | 9217/2297 | 27 |
| MF | GO:0043021 | ribonucleoprotein complex binding                       | 17/547 | 133/18352 | 4.54E-07 | 9.44E-05 | 8.86E-05 | 54915/512 | 17 |
| MF | GO:0016887 | ATPase activity                                         | 33/547 | 423/18352 | 5.17E-07 | 9.44E-05 | 8.86E-05 | 7153/5984 | 33 |
| MF | GO:0004298 | threonine-type endopeptidase activity                   | 7/547  | 21/18352  | 1.63E-06 | 0.000237 | 0.000223 | 5695/5691 | 7  |
| MF | GO:0043138 | 3'-5' DNA helicase activity                             | 6/547  | 19/18352  | 1.33E-05 | 0.001617 | 0.001518 | 9401/4175 | 6  |
| MF | GO:0140097 | catalytic activity, acting on DNA                       | 19/547 | 209/18352 | 1.69E-05 | 0.001762 | 0.001654 | 7153/5984 | 19 |
| MF | GO:0070003 | threonine-type peptidase activity                       | 7/547  | 31/18352  | 2.84E-05 | 0.00259  | 0.002431 | 5695/5691 | 7  |
| MF | GO:0003688 | DNA replication origin binding                          | 6/547  | 23/18352  | 4.47E-05 | 0.003624 | 0.003402 | 4998/4175 | 6  |
| MF | GO:0008094 | DNA-dependent ATPase activity                           | 12/547 | 108/18352 | 9.02E-05 | 0.006584 | 0.006181 | 7153/5984 | 12 |
| MF | GO:0017116 | single-stranded DNA helicase activity                   | 5/547  | 18/18352  | 0.000143 | 0.009516 | 0.008933 | 5984/5983 | 5  |
| MF | GO:0004386 | helicase activity                                       | 14/547 | 160/18352 | 0.000317 | 0.019285 | 0.018103 | 5984/5983 | 14 |
| MF | GO:0045296 | cadherin binding                                        | 22/547 | 332/18352 | 0.000427 | 0.023486 | 0.022046 | 9217/1080 | 22 |
| MF | GO:1990825 | sequence-specific mRNA binding                          | 4/547  | 13/18352  | 0.00045  | 0.023486 | 0.022046 | 7298/6741 | 4  |
| MF | GO:0003678 | DNA helicase activity                                   | 9/547  | 78/18352  | 0.000509 | 0.024795 | 0.023275 | 5984/5983 | 9  |
| MF | GO:0000900 | translation repressor activity, mRNA regulatory element | 4/547  | 16/18352  | 0.001068 | 0.048716 | 0.04573  | 7298/6472 | 4  |
| MF | GO:0003713 | transcription coactivator activity                      | 18/547 | 267/18352 | 0.001138 | 0.048851 | 0.045857 | 10915/688 | 18 |

Supplementary Table 5. KEGG analysis of genes in the turquoise module

| ID       | Description                   | GeneRatio | BgRatio  | pvalue   | p.adjust | qvalue   | geneID                        | Count |
|----------|-------------------------------|-----------|----------|----------|----------|----------|-------------------------------|-------|
| hsa04110 | Cell cycle                    | 22/281    | 124/8108 | 1.92E-10 | 5.11E-08 | 4.77E-08 | RBL1/RAD21/PTTG1/PRKDC/PLK1/O | 22    |
| hsa03050 | Proteasome                    | 13/281    | 46/8108  | 2.88E-09 | 3.83E-07 | 3.58E-07 | SEM1/PSMD7/PSMD2/PSMD12/PSM   | 13    |
| hsa05014 | Amyotrophic lateral sclerosis | 30/281    | 365/8108 | 8.54E-06 | 0.000758 | 0.000708 | VAPB/TOMM40/SRSF3/SEM1/SDHA/  | 30    |
| hsa05017 | Spinocerebellar ataxia        | 15/281    | 143/8108 | 0.000121 | 0.008076 | 0.007542 | SLC25A5/SEM1/PSMD7/PSMD2/PSM  | 15    |
| hsa05020 | Prion disease                 | 22/281    | 273/8108 | 0.00019  | 0.010114 | 0.009445 | SLC25A5/SEM1/SDHA/PSMD7/PSM   | 22    |
| hsa05016 | Huntington disease            | 23/281    | 306/8108 | 0.000376 | 0.014764 | 0.013788 | TFAM/SLC25A5/SEM1/SDHA/PSMD   | 23    |
| hsa05012 | Parkinson disease             | 20/281    | 249/8108 | 0.000389 | 0.014764 | 0.013788 | TXN/SLC25A5/SEM1/SDHA/PSMD7/  | 20    |
| hsa04114 | Oocyte meiosis                | 13/281    | 129/8108 | 0.000507 | 0.01686  | 0.015746 | PTTG1/PLK1/MAPK14/MAD2L1/FBX  | 13    |
| hsa05010 | Alzheimer disease             | 25/281    | 369/8108 | 0.000983 | 0.029065 | 0.027145 | SLC25A5/SEM1/SDHA/PSMD7/PSM   | 25    |
| hsa03040 | Spliceosome                   | 13/281    | 147/8108 | 0.001721 | 0.045778 | 0.042752 | U2AF1/TCERG1/SRSF3/SNRPG/SNR  | 13    |

Supplementary Table 6. GO analysis of genes in the blue module

| ONTOLOGY | ID         | Description                                     | GeneRatio | BgRatio   | pvalue   | p.adjust | qvalue   | genelD    | Count |
|----------|------------|-------------------------------------------------|-----------|-----------|----------|----------|----------|-----------|-------|
| BP       | GO:0030198 | extracellular matrix organization               | 27/256    | 395/18866 | 5.62E-12 | 1.12E-08 | 9.30E-09 | 7177/7132 | 27    |
| BP       | GO:0043062 | extracellular structure organization            | 27/256    | 396/18866 | 5.96E-12 | 1.12E-08 | 9.30E-09 | 7177/7132 | 27    |
| BP       | GO:1903053 | regulation of extracellular matrix organization | 8/256     | 44/18866  | 1.20E-07 | 0.00015  | 0.000125 | 7132/7040 | 8     |
| BP       | GO:0007162 | negative regulation of cell adhesion            | 18/256    | 301/18866 | 1.68E-07 | 0.000158 | 0.000131 | 7001/384/ | 18    |
| BP       | GO:1903077 | negative regulation of protein localization to  | 6/256     | 23/18866  | 4.90E-07 | 0.000312 | 0.000259 | 8500/7040 | 6     |
| BP       | GO:0007178 | transmembrane receptor protein serine/thre      | 19/256    | 359/18866 | 4.98E-07 | 0.000312 | 0.000259 | 7314/1045 | 19    |
| BP       | GO:1904376 | negative regulation of protein localization to  | 6/256     | 25/18866  | 8.40E-07 | 0.000452 | 0.000374 | 8500/7040 | 6     |
| BP       | GO:0022408 | negative regulation of cell-cell adhesion       | 13/256    | 191/18866 | 2.18E-06 | 0.001027 | 0.000851 | 7001/384/ | 13    |
| BP       | GO:0032963 | collagen metabolic process                      | 10/256    | 113/18866 | 3.24E-06 | 0.001227 | 0.001017 | 265/7040/ | 10    |
| BP       | GO:1905476 | negative regulation of protein localization to  | 6/256     | 31/18866  | 3.26E-06 | 0.001227 | 0.001017 | 8500/7040 | 6     |
| BP       | GO:0030111 | regulation of Wnt signaling pathway             | 18/256    | 375/18866 | 3.99E-06 | 0.001364 | 0.001131 | 8629/6512 | 18    |
| BP       | GO:0071902 | positive regulation of protein serine/threoni   | 17/256    | 345/18866 | 5.26E-06 | 0.001615 | 0.001339 | 7314/7039 | 17    |
| BP       | GO:0090287 | regulation of cellular response to growth fac   | 16/256    | 310/18866 | 5.58E-06 | 0.001615 | 0.001339 | 7314/2309 | 16    |
| BP       | GO:1904375 | regulation of protein localization to cell peri | 10/256    | 123/18866 | 6.95E-06 | 0.001772 | 0.001469 | 8500/7040 | 10    |
| BP       | GO:0032964 | collagen biosynthetic process                   | 7/256     | 53/18866  | 7.06E-06 | 0.001772 | 0.001469 | 265/7040/ | 7     |
| BP       | GO:1905314 | semi-lunar valve development                    | 6/256     | 37/18866  | 9.62E-06 | 0.002164 | 0.001794 | 7132/7040 | 6     |
| BP       | GO:0060840 | artery development                              | 9/256     | 102/18866 | 1.03E-05 | 0.002164 | 0.001794 | 10454/646 | 9     |
| BP       | GO:1903076 | regulation of protein localization to plasma    | 9/256     | 102/18866 | 1.03E-05 | 0.002164 | 0.001794 | 8500/7040 | 9     |
| BP       | GO:0003007 | heart morphogenesis                             | 14/256    | 258/18866 | 1.24E-05 | 0.002419 | 0.002006 | 10454/704 | 14    |
| BP       | GO:0003151 | outflow tract morphogenesis                     | 8/256     | 80/18866  | 1.29E-05 | 0.002419 | 0.002006 | 55742/882 | 8     |
| BP       | GO:0061448 | connective tissue development                   | 14/256    | 262/18866 | 1.47E-05 | 0.002632 | 0.002181 | 7314/265/ | 14    |
| BP       | GO:0006024 | glycosaminoglycan biosynthetic process          | 9/256     | 108/18866 | 1.65E-05 | 0.00272  | 0.002254 | 9956/7040 | 9     |
| BP       | GO:0051216 | cartilage development                           | 12/256    | 197/18866 | 1.66E-05 | 0.00272  | 0.002254 | 265/6935/ | 12    |
| BP       | GO:1903038 | negative regulation of leukocyte cell-cell ad   | 10/256    | 137/18866 | 1.80E-05 | 0.002822 | 0.002339 | 7001/384/ | 10    |
| BP       | GO:0032967 | positive regulation of collagen biosynthetic    | 5/256     | 26/18866  | 2.30E-05 | 0.00347  | 0.002876 | 265/7040/ | 5     |
| BP       | GO:0050866 | negative regulation of cell activation          | 12/256    | 207/18866 | 2.72E-05 | 0.003761 | 0.003117 | 7001/384/ | 12    |
| BP       | GO:0006023 | aminoglycan biosynthetic process                | 9/256     | 115/18866 | 2.73E-05 | 0.003761 | 0.003117 | 9956/7040 | 9     |
| BP       | GO:0010714 | positive regulation of collagen metabolic pr    | 5/256     | 27/18866  | 2.80E-05 | 0.003761 | 0.003117 | 265/7040/ | 5     |
| BP       | GO:0060021 | roof of mouth development                       | 8/256     | 91/18866  | 3.32E-05 | 0.004199 | 0.00348  | 2049/6591 | 8     |
| BP       | GO:0050868 | negative regulation of T cell activation        | 9/256     | 118/18866 | 3.35E-05 | 0.004199 | 0.00348  | 7001/384/ | 9     |
| BP       | GO:0045581 | negative regulation of T cell differentiation   | 6/256     | 46/18866  | 3.50E-05 | 0.004248 | 0.003522 | 7001/7292 | 6     |
| BP       | GO:0048732 | gland development                               | 18/256    | 443/18866 | 3.76E-05 | 0.00442  | 0.003664 | 29842/664 | 18    |
| BP       | GO:0060485 | mesenchyme development                          | 14/256    | 290/18866 | 4.50E-05 | 0.005134 | 0.004256 | 10505/265 | 14    |
| BP       | GO:0090092 | regulation of transmembrane receptor prote      | 13/256    | 254/18866 | 4.64E-05 | 0.005137 | 0.004258 | 7314/2309 | 13    |
| BP       | GO:0051250 | negative regulation of lymphocyte activation    | 10/256    | 154/18866 | 4.92E-05 | 0.005279 | 0.004376 | 7001/384/ | 10    |
| BP       | GO:0010712 | regulation of collagen metabolic process        | 6/256     | 49/18866  | 5.05E-05 | 0.005279 | 0.004376 | 265/7040/ | 6     |

|    |            |                                                 |        |           |          |          |          |           |    |
|----|------------|-------------------------------------------------|--------|-----------|----------|----------|----------|-----------|----|
| BP | GO:0060828 | regulation of canonical Wnt signaling pathw     | 14/256 | 295/18866 | 5.42E-05 | 0.005509 | 0.004566 | 8629/6512 | 14 |
| BP | GO:0060070 | canonical Wnt signaling pathway                 | 15/256 | 339/18866 | 6.52E-05 | 0.006169 | 0.005114 | 8629/6512 | 15 |
| BP | GO:0003176 | aortic valve development                        | 5/256  | 32/18866  | 6.60E-05 | 0.006169 | 0.005114 | 7132/7040 | 5  |
| BP | GO:0010566 | regulation of ketone biosynthetic process       | 4/256  | 17/18866  | 6.86E-05 | 0.006169 | 0.005114 | 23408/118 | 4  |
| BP | GO:0010715 | regulation of extracellular matrix disassembl   | 4/256  | 17/18866  | 6.86E-05 | 0.006169 | 0.005114 | 7040/4035 | 4  |
| BP | GO:0043406 | positive regulation of MAP kinase activity      | 13/256 | 264/18866 | 6.88E-05 | 0.006169 | 0.005114 | 7314/7039 | 13 |
| BP | GO:0035924 | cellular response to vascular endothelial gro   | 7/256  | 75/18866  | 7.06E-05 | 0.006179 | 0.005122 | 5159/5156 | 7  |
| BP | GO:0048762 | mesenchymal cell differentiation                | 12/256 | 229/18866 | 7.25E-05 | 0.006202 | 0.005141 | 10505/265 | 12 |
| BP | GO:0001649 | osteoblast differentiation                      | 12/256 | 231/18866 | 7.88E-05 | 0.00659  | 0.005462 | 265/6591/ | 12 |
| BP | GO:1902106 | negative regulation of leukocyte differentiat   | 8/256  | 105/18866 | 9.24E-05 | 0.007542 | 0.006252 | 7001/7292 | 8  |
| BP | GO:0045620 | negative regulation of lymphocyte differenti    | 6/256  | 55/18866  | 9.78E-05 | 0.007542 | 0.006252 | 7001/7292 | 6  |
| BP | GO:0014812 | muscle cell migration                           | 8/256  | 106/18866 | 9.88E-05 | 0.007542 | 0.006252 | 5159/5574 | 8  |
| BP | GO:0034446 | substrate adhesion-dependent cell spreadin      | 8/256  | 106/18866 | 9.88E-05 | 0.007542 | 0.006252 | 2049/5574 | 8  |
| BP | GO:0071772 | response to BMP                                 | 10/256 | 168/18866 | 0.000102 | 0.007542 | 0.006252 | 23090/704 | 10 |
| BP | GO:0071773 | cellular response to BMP stimulus               | 10/256 | 168/18866 | 0.000102 | 0.007542 | 0.006252 | 23090/704 | 10 |
| BP | GO:0045063 | T-helper 1 cell differentiation                 | 4/256  | 19/18866  | 0.000109 | 0.007764 | 0.006436 | 7292/5117 | 4  |
| BP | GO:0072074 | kidney mesenchyme development                   | 4/256  | 19/18866  | 0.000109 | 0.007764 | 0.006436 | 6469/5311 | 4  |
| BP | GO:0031589 | cell-substrate adhesion                         | 15/256 | 359/18866 | 0.000123 | 0.008385 | 0.006951 | 8500/2049 | 15 |
| BP | GO:0007568 | aging                                           | 14/256 | 319/18866 | 0.000124 | 0.008385 | 0.006951 | 29842/664 | 14 |
| BP | GO:0022617 | extracellular matrix disassembly                | 7/256  | 82/18866  | 0.000125 | 0.008385 | 0.006951 | 7177/7040 | 7  |
| BP | GO:0001503 | ossification                                    | 16/256 | 412/18866 | 0.000171 | 0.01103  | 0.009143 | 265/7040/ | 16 |
| BP | GO:0007431 | salivary gland development                      | 5/256  | 39/18866  | 0.000175 | 0.01103  | 0.009143 | 29842/118 | 5  |
| BP | GO:0003170 | heart valve development                         | 6/256  | 61/18866  | 0.000175 | 0.01103  | 0.009143 | 7132/7040 | 6  |
| BP | GO:1902105 | regulation of leukocyte differentiation         | 13/256 | 290/18866 | 0.000176 | 0.01103  | 0.009143 | 6647/7001 | 13 |
| BP | GO:0032147 | activation of protein kinase activity           | 14/256 | 331/18866 | 0.000183 | 0.011251 | 0.009326 | 7314/7039 | 14 |
| BP | GO:1903828 | negative regulation of cellular protein localiz | 8/256  | 116/18866 | 0.000185 | 0.011251 | 0.009326 | 8500/9555 | 8  |
| BP | GO:0045619 | regulation of lymphocyte differentiation        | 10/256 | 181/18866 | 0.000188 | 0.011258 | 0.009332 | 6647/7001 | 10 |
| BP | GO:0046636 | negative regulation of alpha-beta T cell acti   | 5/256  | 40/18866  | 0.000197 | 0.011614 | 0.009627 | 384/7292/ | 5  |
| BP | GO:0030177 | positive regulation of Wnt signaling pathwa     | 10/256 | 183/18866 | 0.000206 | 0.011915 | 0.009877 | 8629/6512 | 10 |
| BP | GO:0002683 | negative regulation of immune system proc       | 17/256 | 463/18866 | 0.000209 | 0.011915 | 0.009877 | 7001/3313 | 17 |
| BP | GO:0045580 | regulation of T cell differentiation            | 9/256  | 150/18866 | 0.000213 | 0.011917 | 0.009878 | 6647/7001 | 9  |
| BP | GO:0002695 | negative regulation of leukocyte activation     | 10/256 | 184/18866 | 0.000215 | 0.011917 | 0.009878 | 7001/384/ | 10 |
| BP | GO:0043405 | regulation of MAP kinase activity               | 14/256 | 342/18866 | 0.000255 | 0.013921 | 0.011539 | 7314/7039 | 14 |
| BP | GO:0030509 | BMP signaling pathway                           | 9/256  | 155/18866 | 0.000272 | 0.014239 | 0.011803 | 23090/704 | 9  |
| BP | GO:0014909 | smooth muscle cell migration                    | 7/256  | 93/18866  | 0.000274 | 0.014239 | 0.011803 | 5159/5574 | 7  |
| BP | GO:0030510 | regulation of BMP signaling pathway             | 7/256  | 93/18866  | 0.000274 | 0.014239 | 0.011803 | 23090/642 | 7  |
| BP | GO:0045625 | regulation of T-helper 1 cell differentiation   | 3/256  | 10/18866  | 0.000276 | 0.014239 | 0.011803 | 7292/3566 | 3  |
| BP | GO:0048745 | smooth muscle tissue development                | 4/256  | 24/18866  | 0.000284 | 0.014454 | 0.011981 | 6469/5311 | 4  |

|    |            |                                                |        |           |          |          |          |           |    |
|----|------------|------------------------------------------------|--------|-----------|----------|----------|----------|-----------|----|
| BP | GO:0032965 | regulation of collagen biosynthetic process    | 5/256  | 44/18866  | 0.000312 | 0.015351 | 0.012724 | 265/7040/ | 5  |
| BP | GO:0030203 | glycosaminoglycan metabolic process            | 9/256  | 158/18866 | 0.000314 | 0.015351 | 0.012724 | 9956/7040 | 9  |
| BP | GO:1903707 | negative regulation of hemopoiesis             | 9/256  | 158/18866 | 0.000314 | 0.015351 | 0.012724 | 7001/3313 | 9  |
| BP | GO:0001667 | ameboidal-type cell migration                  | 17/256 | 481/18866 | 0.000325 | 0.015702 | 0.013015 | 10505/704 | 17 |
| BP | GO:0046639 | negative regulation of alpha-beta T cell diff  | 4/256  | 25/18866  | 0.000335 | 0.015947 | 0.013218 | 7292/6469 | 4  |
| BP | GO:0022407 | regulation of cell-cell adhesion               | 16/256 | 439/18866 | 0.000347 | 0.016347 | 0.01355  | 7001/2049 | 16 |
| BP | GO:0045628 | regulation of T-helper 2 cell differentiation  | 3/256  | 11/18866  | 0.000376 | 0.017255 | 0.014303 | 7292/3566 | 3  |
| BP | GO:0090030 | regulation of steroid hormone biosynthetic     | 3/256  | 11/18866  | 0.000376 | 0.017255 | 0.014303 | 1181/9563 | 3  |
| BP | GO:0048608 | reproductive structure development             | 16/256 | 443/18866 | 0.000384 | 0.017406 | 0.014428 | 7314/6647 | 16 |
| BP | GO:0046777 | protein autophosphorylation                    | 11/256 | 237/18866 | 0.000411 | 0.018419 | 0.015268 | 4296/2285 | 11 |
| BP | GO:0061458 | reproductive system development                | 16/256 | 447/18866 | 0.000423 | 0.018751 | 0.015543 | 7314/6647 | 16 |
| BP | GO:0003148 | outflow tract septum morphogenesis             | 4/256  | 27/18866  | 0.000455 | 0.019666 | 0.016301 | 55742/882 | 4  |
| BP | GO:0033081 | regulation of T cell differentiation in thymus | 4/256  | 27/18866  | 0.000455 | 0.019666 | 0.016301 | 6647/6935 | 4  |
| BP | GO:0003180 | aortic valve morphogenesis                     | 4/256  | 28/18866  | 0.000525 | 0.021944 | 0.01819  | 7040/6591 | 4  |
| BP | GO:0061437 | renal system vasculature development           | 4/256  | 28/18866  | 0.000525 | 0.021944 | 0.01819  | 5311/5159 | 4  |
| BP | GO:0061440 | kidney vasculature development                 | 4/256  | 28/18866  | 0.000525 | 0.021944 | 0.01819  | 5311/5159 | 4  |
| BP | GO:0048844 | artery morphogenesis                           | 6/256  | 75/18866  | 0.000542 | 0.022421 | 0.018584 | 5396/5311 | 6  |
| BP | GO:0010718 | positive regulation of epithelial to mesenchy  | 5/256  | 50/18866  | 0.000569 | 0.0233   | 0.019313 | 7040/2898 | 5  |
| BP | GO:0006022 | aminoglycan metabolic process                  | 9/256  | 172/18866 | 0.000584 | 0.023619 | 0.019578 | 9956/7040 | 9  |
| BP | GO:0018108 | peptidyl-tyrosine phosphorylation              | 14/256 | 374/18866 | 0.000623 | 0.023985 | 0.019881 | 7039/2285 | 14 |
| BP | GO:0060411 | cardiac septum morphogenesis                   | 6/256  | 77/18866  | 0.000624 | 0.023985 | 0.019881 | 55742/882 | 6  |
| BP | GO:0035272 | exocrine system development                    | 5/256  | 51/18866  | 0.000624 | 0.023985 | 0.019881 | 29842/118 | 5  |
| BP | GO:0038084 | vascular endothelial growth factor signaling   | 5/256  | 51/18866  | 0.000624 | 0.023985 | 0.019881 | 5159/5156 | 5  |
| BP | GO:0043277 | apoptotic cell clearance                       | 5/256  | 51/18866  | 0.000624 | 0.023985 | 0.019881 | 4035/3685 | 5  |
| BP | GO:0034309 | primary alcohol biosynthetic process           | 3/256  | 13/18866  | 0.000639 | 0.02428  | 0.020126 | 1181/9563 | 3  |
| BP | GO:0018212 | peptidyl-tyrosine modification                 | 14/256 | 377/18866 | 0.000674 | 0.02536  | 0.021021 | 7039/2285 | 14 |
| BP | GO:0003179 | heart valve morphogenesis                      | 5/256  | 52/18866  | 0.000683 | 0.025467 | 0.02111  | 7040/6591 | 5  |
| BP | GO:0007492 | endoderm development                           | 6/256  | 79/18866  | 0.000715 | 0.026141 | 0.021668 | 9555/3915 | 6  |
| BP | GO:0010827 | regulation of glucose transmembrane transp     | 6/256  | 79/18866  | 0.000715 | 0.026141 | 0.021668 | 2171/2343 | 6  |
| BP | GO:0045661 | regulation of myoblast differentiation         | 5/256  | 53/18866  | 0.000746 | 0.02701  | 0.022389 | 55662/704 | 5  |
| BP | GO:0014032 | neural crest cell development                  | 6/256  | 80/18866  | 0.000765 | 0.02722  | 0.022563 | 10505/659 | 6  |
| BP | GO:0002828 | regulation of type 2 immune response           | 4/256  | 31/18866  | 0.000781 | 0.02722  | 0.022563 | 384/7292/ | 4  |
| BP | GO:0061037 | negative regulation of cartilage developmen    | 4/256  | 31/18866  | 0.000781 | 0.02722  | 0.022563 | 6591/1513 | 4  |
| BP | GO:2000515 | negative regulation of CD4-positive, alpha-    | 4/256  | 31/18866  | 0.000781 | 0.02722  | 0.022563 | 384/7292/ | 4  |
| BP | GO:0035791 | platelet-derived growth factor receptor-bet    | 3/256  | 14/18866  | 0.000805 | 0.027533 | 0.022822 | 5157/5159 | 3  |
| BP | GO:1903054 | negative regulation of extracellular matrix o  | 3/256  | 14/18866  | 0.000805 | 0.027533 | 0.022822 | 7132/7040 | 3  |
| BP | GO:0007596 | blood coagulation                              | 13/256 | 343/18866 | 0.000865 | 0.029316 | 0.0243   | 7001/6469 | 13 |
| BP | GO:0030199 | collagen fibril organization                   | 5/256  | 55/18866  | 0.000885 | 0.029743 | 0.024654 | 4060/4016 | 5  |

|    |            |                                               |        |           |          |          |          |           |    |
|----|------------|-----------------------------------------------|--------|-----------|----------|----------|----------|-----------|----|
| BP | GO:1903034 | regulation of response to wounding            | 9/256  | 183/18866 | 0.000908 | 0.030261 | 0.025083 | 7001/6558 | 9  |
| BP | GO:0001570 | vasculogenesis                                | 6/256  | 83/18866  | 0.000929 | 0.030447 | 0.025238 | 55662/704 | 6  |
| BP | GO:0003279 | cardiac septum development                    | 7/256  | 114/18866 | 0.000936 | 0.030447 | 0.025238 | 10454/557 | 7  |
| BP | GO:0051051 | negative regulation of transport              | 16/256 | 483/18866 | 0.000969 | 0.030447 | 0.025238 | 28978/404 | 16 |
| BP | GO:0007599 | hemostasis                                    | 13/256 | 348/18866 | 0.000986 | 0.030447 | 0.025238 | 7001/6469 | 13 |
| BP | GO:0014031 | mesenchymal cell development                  | 6/256  | 84/18866  | 0.000989 | 0.030447 | 0.025238 | 10505/659 | 6  |
| BP | GO:0048864 | stem cell development                         | 6/256  | 84/18866  | 0.000989 | 0.030447 | 0.025238 | 10505/659 | 6  |
| BP | GO:0010464 | regulation of mesenchymal cell proliferation  | 4/256  | 33/18866  | 0.000994 | 0.030447 | 0.025238 | 6935/6469 | 4  |
| BP | GO:0045064 | T-helper 2 cell differentiation               | 3/256  | 15/18866  | 0.000996 | 0.030447 | 0.025238 | 7292/3566 | 3  |
| BP | GO:0060391 | positive regulation of SMAD protein signal t  | 3/256  | 15/18866  | 0.000996 | 0.030447 | 0.025238 | 7040/1601 | 3  |
| BP | GO:0072075 | metanephric mesenchyme development            | 3/256  | 15/18866  | 0.000996 | 0.030447 | 0.025238 | 6469/5311 | 3  |
| BP | GO:0048863 | stem cell differentiation                     | 11/256 | 264/18866 | 0.001003 | 0.030447 | 0.025238 | 79918/105 | 11 |
| BP | GO:0050817 | coagulation                                   | 13/256 | 349/18866 | 0.001013 | 0.030489 | 0.025272 | 7001/6469 | 13 |
| BP | GO:0061041 | regulation of wound healing                   | 8/256  | 151/18866 | 0.00108  | 0.032257 | 0.026738 | 7001/6558 | 8  |
| BP | GO:0040013 | negative regulation of locomotion             | 14/256 | 397/18866 | 0.001108 | 0.032374 | 0.026835 | 10505/704 | 14 |
| BP | GO:0043276 | anoikis                                       | 4/256  | 34/18866  | 0.001115 | 0.032374 | 0.026835 | 23604/659 | 4  |
| BP | GO:0014910 | regulation of smooth muscle cell migration    | 6/256  | 86/18866  | 0.001118 | 0.032374 | 0.026835 | 5159/4035 | 6  |
| BP | GO:0045445 | myoblast differentiation                      | 6/256  | 86/18866  | 0.001118 | 0.032374 | 0.026835 | 55662/704 | 6  |
| BP | GO:0001837 | epithelial to mesenchymal transition          | 8/256  | 152/18866 | 0.001127 | 0.032374 | 0.026835 | 265/7040/ | 8  |
| BP | GO:0051271 | negative regulation of cellular component m   | 14/256 | 400/18866 | 0.00119  | 0.033925 | 0.028121 | 10505/704 | 14 |
| BP | GO:1901201 | regulation of extracellular matrix assembly   | 3/256  | 16/18866  | 0.001213 | 0.034239 | 0.028381 | 7040/2898 | 3  |
| BP | GO:0048008 | platelet-derived growth factor receptor sign  | 5/256  | 59/18866  | 0.001219 | 0.034239 | 0.028381 | 5157/5159 | 5  |
| BP | GO:0014068 | positive regulation of phosphatidylinositol 3 | 6/256  | 88/18866  | 0.00126  | 0.035145 | 0.029132 | 79899/556 | 6  |
| BP | GO:0035904 | aorta development                             | 5/256  | 60/18866  | 0.001315 | 0.0364   | 0.030173 | 10454/531 | 5  |
| BP | GO:0014033 | neural crest cell differentiation             | 6/256  | 89/18866  | 0.001337 | 0.036523 | 0.030274 | 10505/659 | 6  |
| BP | GO:0070997 | neuron death                                  | 13/256 | 360/18866 | 0.001339 | 0.036523 | 0.030274 | 7314/6647 | 13 |
| BP | GO:0071634 | regulation of transforming growth factor be   | 4/256  | 36/18866  | 0.001387 | 0.037449 | 0.031042 | 4060/2615 | 4  |
| BP | GO:0050673 | epithelial cell proliferation                 | 15/256 | 453/18866 | 0.001393 | 0.037449 | 0.031042 | 7039/7040 | 15 |
| BP | GO:0042098 | T cell proliferation                          | 9/256  | 195/18866 | 0.001417 | 0.037551 | 0.031126 | 7001/384/ | 9  |
| BP | GO:1905475 | regulation of protein localization to membra  | 9/256  | 195/18866 | 0.001417 | 0.037551 | 0.031126 | 8500/7040 | 9  |
| BP | GO:0045623 | negative regulation of T-helper cell differen | 3/256  | 17/18866  | 0.001459 | 0.038071 | 0.031558 | 7292/3566 | 3  |
| BP | GO:2000811 | negative regulation of anoikis                | 3/256  | 17/18866  | 0.001459 | 0.038071 | 0.031558 | 6591/4170 | 3  |
| BP | GO:0060537 | muscle tissue development                     | 14/256 | 409/18866 | 0.001467 | 0.038071 | 0.031558 | 140465/70 | 14 |
| BP | GO:0007159 | leukocyte cell-cell adhesion                  | 13/256 | 364/18866 | 0.001478 | 0.038096 | 0.031578 | 7001/384/ | 13 |
| BP | GO:0042475 | odontogenesis of dentin-containing tooth      | 6/256  | 91/18866  | 0.001499 | 0.038384 | 0.031817 | 265/6469/ | 6  |
| BP | GO:2000146 | negative regulation of cell motility          | 13/256 | 365/18866 | 0.001514 | 0.038508 | 0.03192  | 7040/6469 | 13 |
| BP | GO:0060428 | lung epithelium development                   | 4/256  | 37/18866  | 0.001538 | 0.038859 | 0.03221  | 6469/5733 | 4  |
| BP | GO:0035270 | endocrine system development                  | 7/256  | 125/18866 | 0.0016   | 0.040149 | 0.033279 | 6469/5159 | 7  |

|    |            |                                                |        |           |          |          |          |           |    |
|----|------------|------------------------------------------------|--------|-----------|----------|----------|----------|-----------|----|
| BP | GO:0072659 | protein localization to plasma membrane        | 11/256 | 281/18866 | 0.001652 | 0.041176 | 0.034131 | 8500/7132 | 11 |
| BP | GO:0055007 | cardiac muscle cell differentiation            | 7/256  | 126/18866 | 0.001675 | 0.041223 | 0.03417  | 7040/5159 | 7  |
| BP | GO:0031032 | actomyosin structure organization              | 9/256  | 200/18866 | 0.001687 | 0.041223 | 0.03417  | 8500/7791 | 9  |
| BP | GO:2000377 | regulation of reactive oxygen species metab    | 9/256  | 200/18866 | 0.001687 | 0.041223 | 0.03417  | 6647/2340 | 9  |
| BP | GO:0071604 | transforming growth factor beta production     | 4/256  | 38/18866  | 0.001701 | 0.041309 | 0.034241 | 4060/2615 | 4  |
| BP | GO:0046885 | regulation of hormone biosynthetic process     | 3/256  | 18/18866  | 0.001733 | 0.041811 | 0.034658 | 1181/9563 | 3  |
| BP | GO:0014066 | regulation of phosphatidylinositol 3-kinase    | 7/256  | 127/18866 | 0.001753 | 0.041864 | 0.034701 | 5270/7989 | 7  |
| BP | GO:0042130 | negative regulation of T cell proliferation    | 5/256  | 64/18866  | 0.001757 | 0.041864 | 0.034701 | 384/6469/ | 5  |
| BP | GO:0045778 | positive regulation of ossification            | 6/256  | 94/18866  | 0.001771 | 0.041915 | 0.034743 | 7040/9260 | 6  |
| BP | GO:0007179 | transforming growth factor beta receptor sig   | 9/256  | 202/18866 | 0.001806 | 0.042474 | 0.035207 | 7314/1045 | 9  |
| BP | GO:1903037 | regulation of leukocyte cell-cell adhesion     | 12/256 | 329/18866 | 0.00187  | 0.043577 | 0.036121 | 7001/384/ | 12 |
| BP | GO:0042092 | type 2 immune response                         | 4/256  | 39/18866  | 0.001876 | 0.043577 | 0.036121 | 384/7292/ | 4  |
| BP | GO:0002576 | platelet degranulation                         | 7/256  | 129/18866 | 0.001916 | 0.043785 | 0.036294 | 6647/7078 | 7  |
| BP | GO:0001655 | urogenital system development                  | 12/256 | 330/18866 | 0.001918 | 0.043785 | 0.036294 | 2049/384/ | 12 |
| BP | GO:0060348 | bone development                               | 9/256  | 204/18866 | 0.001931 | 0.043785 | 0.036294 | 6424/5603 | 9  |
| BP | GO:0060541 | respiratory system development                 | 9/256  | 204/18866 | 0.001931 | 0.043785 | 0.036294 | 10454/646 | 9  |
| BP | GO:0045669 | positive regulation of osteoblast differentiat | 5/256  | 66/18866  | 0.002015 | 0.044584 | 0.036956 | 9260/3611 | 5  |
| BP | GO:0050863 | regulation of T cell activation                | 12/256 | 332/18866 | 0.002016 | 0.044584 | 0.036956 | 6647/7001 | 12 |
| BP | GO:0055003 | cardiac myofibril assembly                     | 3/256  | 19/18866  | 0.002037 | 0.044584 | 0.036956 | 5159/5156 | 3  |
| BP | GO:0060438 | trachea development                            | 3/256  | 19/18866  | 0.002037 | 0.044584 | 0.036956 | 6469/5117 | 3  |
| BP | GO:0060973 | cell migration involved in heart developmen    | 3/256  | 19/18866  | 0.002037 | 0.044584 | 0.036956 | 6591/5159 | 3  |
| BP | GO:0150146 | cell junction disassembly                      | 3/256  | 19/18866  | 0.002037 | 0.044584 | 0.036956 | 6591/9448 | 3  |
| BP | GO:0072210 | metanephric nephron development                | 4/256  | 40/18866  | 0.002062 | 0.044863 | 0.037187 | 5311/5159 | 4  |
| BP | GO:0003206 | cardiac chamber morphogenesis                  | 7/256  | 131/18866 | 0.002091 | 0.045241 | 0.0375   | 7040/5574 | 7  |
| BP | GO:0046890 | regulation of lipid biosynthetic process       | 9/256  | 207/18866 | 0.002132 | 0.045862 | 0.038015 | 6647/2171 | 9  |
| BP | GO:0034614 | cellular response to reactive oxygen species   | 8/256  | 170/18866 | 0.002287 | 0.048911 | 0.040543 | 6647/7001 | 8  |
| CC | GO:0062023 | collagen-containing extracellular matrix       | 28/263 | 427/19559 | 4.99E-12 | 1.96E-09 | 1.81E-09 | 265/64499 | 28 |
| CC | GO:0005925 | focal adhesion                                 | 21/263 | 415/19559 | 2.26E-07 | 4.05E-05 | 3.74E-05 | 8500/3313 | 21 |
| CC | GO:0030055 | cell-substrate junction                        | 21/263 | 423/19559 | 3.09E-07 | 4.05E-05 | 3.74E-05 | 8500/3313 | 21 |
| CC | GO:0005788 | endoplasmic reticulum lumen                    | 14/263 | 308/19559 | 7.85E-05 | 0.007711 | 0.007125 | 4043/265/ | 14 |
| CC | GO:0005775 | vacuolar lumen                                 | 10/263 | 173/19559 | 0.000121 | 0.009537 | 0.008813 | 2992/2171 | 10 |
| CC | GO:0005884 | actin filament                                 | 8/263  | 118/19559 | 0.000197 | 0.012871 | 0.011894 | 7456/6525 | 8  |
| CC | GO:0043292 | contractile fiber                              | 11/263 | 238/19559 | 0.000396 | 0.022237 | 0.020549 | 140465/23 | 11 |
| CC | GO:0031252 | cell leading edge                              | 15/263 | 421/19559 | 0.000613 | 0.030095 | 0.02781  | 50855/644 | 15 |
| CC | GO:0001726 | ruffle                                         | 9/263  | 179/19559 | 0.00073  | 0.031883 | 0.029462 | 50855/644 | 9  |
| CC | GO:0030016 | myofibril                                      | 10/263 | 227/19559 | 0.001042 | 0.038544 | 0.035618 | 23345/887 | 10 |
| CC | GO:0031941 | filamentous actin                              | 4/263  | 34/19559  | 0.001079 | 0.038544 | 0.035618 | 6525/5311 | 4  |
| CC | GO:0031091 | platelet alpha granule                         | 6/263  | 91/19559  | 0.001433 | 0.046939 | 0.043375 | 7040/710/ | 6  |



|    |            |                                                 |        |           |          |          |          |           |    |
|----|------------|-------------------------------------------------|--------|-----------|----------|----------|----------|-----------|----|
| MF | GO:0005201 | extracellular matrix structural constituent     | 14/252 | 169/18352 | 9.13E-08 | 5.14E-05 | 4.85E-05 | 265/10418 | 14 |
| MF | GO:1901681 | sulfur compound binding                         | 15/252 | 262/18352 | 3.61E-06 | 0.000961 | 0.000908 | 80339/404 | 15 |
| MF | GO:0005518 | collagen binding                                | 8/252  | 70/18352  | 5.12E-06 | 0.000961 | 0.000908 | 5118/4060 | 8  |
| MF | GO:0004714 | transmembrane receptor protein tyrosine ki      | 7/252  | 61/18352  | 1.96E-05 | 0.002291 | 0.002163 | 2049/5157 | 7  |
| MF | GO:0005539 | glycosaminoglycan binding                       | 13/252 | 232/18352 | 2.03E-05 | 0.002291 | 0.002163 | 4043/6469 | 13 |
| MF | GO:0001968 | fibronectin binding                             | 5/252  | 27/18352  | 2.96E-05 | 0.002776 | 0.002621 | 131578/36 | 5  |
| MF | GO:0005161 | platelet-derived growth factor receptor bind    | 4/252  | 15/18352  | 4.21E-05 | 0.003383 | 0.003194 | 5159/5156 | 4  |
| MF | GO:0019199 | transmembrane receptor protein kinase acti      | 7/252  | 80/18352  | 0.000115 | 0.007979 | 0.007533 | 2049/5157 | 7  |
| MF | GO:0050840 | extracellular matrix binding                    | 6/252  | 57/18352  | 0.000128 | 0.007979 | 0.007533 | 6469/1315 | 6  |
| MF | GO:0097493 | structural molecule activity conferring elastic | 3/252  | 11/18352  | 0.000389 | 0.021906 | 0.020684 | 3915/2199 | 3  |
| MF | GO:0008201 | heparin binding                                 | 9/252  | 169/18352 | 0.000558 | 0.026249 | 0.024784 | 4043/5270 | 9  |
| MF | GO:0004713 | protein tyrosine kinase activity                | 8/252  | 135/18352 | 0.000559 | 0.026249 | 0.024784 | 2049/8445 | 8  |

Supplementary Table 7. GO analysis of genes in the brown module

| ONTOLOGY | ID         | Description                                    | GeneRatio | BgRatio   | pvalue   | p.adjust | qvalue   | geneID    | Count |
|----------|------------|------------------------------------------------|-----------|-----------|----------|----------|----------|-----------|-------|
| BP       | GO:0009266 | response to temperature stimulus               | 13/240    | 233/18866 | 9.50E-06 | 0.01781  | 0.016203 | 5931/1001 | 13    |
| BP       | GO:0070493 | thrombin-activated receptor signaling path     | 4/240     | 12/18866  | 1.17E-05 | 0.01781  | 0.016203 | 4233/3248 | 4     |
| BP       | GO:0045765 | regulation of angiogenesis                     | 17/240    | 403/18866 | 1.71E-05 | 0.01781  | 0.016203 | 5170/1001 | 17    |
| BP       | GO:0090132 | epithelium migration                           | 16/240    | 368/18866 | 2.10E-05 | 0.01781  | 0.016203 | 5170/1001 | 16    |
| BP       | GO:0090130 | tissue migration                               | 16/240    | 374/18866 | 2.56E-05 | 0.01781  | 0.016203 | 5170/1001 | 16    |
| BP       | GO:0019935 | cyclic-nucleotide-mediated signaling           | 12/240    | 224/18866 | 3.14E-05 | 0.018211 | 0.016568 | 2835/997/ | 12    |
| BP       | GO:0007565 | female pregnancy                               | 11/240    | 196/18866 | 4.40E-05 | 0.019558 | 0.017794 | 6573/5671 | 11    |
| BP       | GO:0007007 | inner mitochondrial membrane organizatio       | 6/240     | 52/18866  | 4.97E-05 | 0.019558 | 0.017794 | 8834/2651 | 6     |
| BP       | GO:0019933 | cAMP-mediated signaling                        | 11/240    | 199/18866 | 5.05E-05 | 0.019558 | 0.017794 | 2835/997/ | 11    |
| BP       | GO:1901342 | regulation of vasculature development          | 17/240    | 444/18866 | 5.76E-05 | 0.020086 | 0.018273 | 5170/1001 | 17    |
| BP       | GO:0010631 | epithelial cell migration                      | 15/240    | 365/18866 | 7.21E-05 | 0.022849 | 0.020787 | 5170/1001 | 15    |
| BP       | GO:0010634 | positive regulation of epithelial cell migrati | 10/240    | 176/18866 | 8.83E-05 | 0.025637 | 0.023324 | 5170/1001 | 10    |
| BP       | GO:0043931 | ossification involved in bone maturation       | 4/240     | 20/18866  | 0.000105 | 0.028078 | 0.025545 | 3952/387/ | 4     |
| BP       | GO:0007189 | adenylate cyclase-activating G protein-cou     | 9/240     | 147/18866 | 0.000113 | 0.028078 | 0.025545 | 2835/5744 | 9     |
| BP       | GO:0010632 | regulation of epithelial cell migration        | 13/240    | 301/18866 | 0.000134 | 0.031152 | 0.028341 | 5170/1001 | 13    |
| BP       | GO:0001667 | ameboidal-type cell migration                  | 17/240    | 481/18866 | 0.000152 | 0.031371 | 0.028541 | 5170/1001 | 17    |
| BP       | GO:0044706 | multi-multicellular organism process           | 11/240    | 226/18866 | 0.000157 | 0.031371 | 0.028541 | 6573/5671 | 11    |
| BP       | GO:0098760 | response to interleukin-7                      | 5/240     | 42/18866  | 0.000185 | 0.031371 | 0.028541 | 8968/8358 | 5     |
| BP       | GO:0098761 | cellular response to interleukin-7             | 5/240     | 42/18866  | 0.000185 | 0.031371 | 0.028541 | 8968/8358 | 5     |
| BP       | GO:0070977 | bone maturation                                | 4/240     | 23/18866  | 0.000187 | 0.031371 | 0.028541 | 3952/387/ | 4     |
| BP       | GO:0016049 | cell growth                                    | 17/240    | 490/18866 | 0.000189 | 0.031371 | 0.028541 | 5931/1020 | 17    |
| BP       | GO:0019932 | second-messenger-mediated signaling            | 16/240    | 456/18866 | 0.000257 | 0.037435 | 0.034057 | 5170/2835 | 16    |
| BP       | GO:0098727 | maintenance of cell number                     | 9/240     | 164/18866 | 0.000257 | 0.037435 | 0.034057 | 23160/694 | 9     |
| BP       | GO:0051204 | protein insertion into mitochondrial memb      | 5/240     | 45/18866  | 0.000258 | 0.037435 | 0.034057 | 26517/265 | 5     |
| BP       | GO:0009408 | response to heat                               | 9/240     | 166/18866 | 0.000282 | 0.039259 | 0.035716 | 5931/1001 | 9     |
| BP       | GO:0043542 | endothelial cell migration                     | 12/240    | 286/18866 | 0.000315 | 0.040924 | 0.037231 | 5170/1001 | 12    |
| BP       | GO:0046677 | response to antibiotic                         | 5/240     | 47/18866  | 0.000317 | 0.040924 | 0.037231 | 51319/332 | 5     |
| BP       | GO:0001558 | regulation of cell growth                      | 15/240    | 420/18866 | 0.000332 | 0.041338 | 0.037607 | 5931/1020 | 15    |
| BP       | GO:0140056 | organelle localization by membrane tetheri     | 9/240     | 171/18866 | 0.000351 | 0.041367 | 0.037634 | 6809/9342 | 9     |
| BP       | GO:0048799 | animal organ maturation                        | 4/240     | 27/18866  | 0.000356 | 0.041367 | 0.037634 | 3952/387/ | 4     |
| BP       | GO:0090151 | establishment of protein localization to mit   | 5/240     | 49/18866  | 0.000386 | 0.043405 | 0.039488 | 26517/265 | 5     |
| BP       | GO:0071560 | cellular response to transforming growth fa    | 11/240    | 252/18866 | 0.0004   | 0.04359  | 0.039656 | 5170/1075 | 11    |
| CC       | GO:0005901 | caveola                                        | 8/247     | 82/19559  | 9.20E-06 | 0.003579 | 0.003264 | 7048/7035 | 8     |
| CC       | GO:0044853 | plasma membrane raft                           | 8/247     | 113/19559 | 9.44E-05 | 0.018368 | 0.01675  | 7048/7035 | 8     |
| CC       | GO:0045121 | membrane raft                                  | 13/247    | 329/19559 | 0.000299 | 0.02975  | 0.027129 | 8772/7048 | 13    |
| CC       | GO:0098857 | membrane microdomain                           | 13/247    | 330/19559 | 0.000308 | 0.02975  | 0.027129 | 8772/7048 | 13    |

|    |            |                 |        |           |          |         |          |           |    |
|----|------------|-----------------|--------|-----------|----------|---------|----------|-----------|----|
| CC | GO:0098589 | membrane region | 13/247 | 343/19559 | 0.000444 | 0.02975 | 0.027129 | 8772/7048 | 13 |
| CC | GO:0000792 | heterochromatin | 6/247  | 78/19559  | 0.000459 | 0.02975 | 0.027129 | 79968/420 | 6  |

Supplementary Table 8. GO analysis of genes in the yellow module

| ONTOLOG | ID         | Description                                      | GeneRatio | BgRatio   | pvalue   | p.adjust | qvalue   | genelD    | Count |
|---------|------------|--------------------------------------------------|-----------|-----------|----------|----------|----------|-----------|-------|
| BP      | GO:0002429 | immune response-activating cell surface rece     | 18/87     | 481/18866 | 5.74E-12 | 5.22E-09 | 4.65E-09 | 2359/784/ | 18    |
| BP      | GO:0002757 | immune response-activating signal transduct      | 18/87     | 481/18866 | 5.74E-12 | 5.22E-09 | 4.65E-09 | 2359/784/ | 18    |
| BP      | GO:0050851 | antigen receptor-mediated signaling pathway      | 15/87     | 325/18866 | 2.18E-11 | 1.32E-08 | 1.17E-08 | 784/7535/ | 15    |
| BP      | GO:0050852 | T cell receptor signaling pathway                | 10/87     | 206/18866 | 3.73E-08 | 1.69E-05 | 1.51E-05 | 784/7535/ | 10    |
| BP      | GO:0042113 | B cell activation                                | 10/87     | 328/18866 | 2.69E-06 | 0.000904 | 0.000804 | 7535/7099 | 10    |
| BP      | GO:0050853 | B cell receptor signaling pathway                | 7/87      | 135/18866 | 2.98E-06 | 0.000904 | 0.000804 | 23180/507 | 7     |
| BP      | GO:0030316 | osteoclast differentiation                       | 6/87      | 98/18866  | 6.05E-06 | 0.001572 | 0.001399 | 11025/123 | 6     |
| BP      | GO:0030098 | lymphocyte differentiation                       | 10/87     | 368/18866 | 7.44E-06 | 0.001575 | 0.001402 | 7535/6421 | 10    |
| BP      | GO:0002460 | adaptive immune response based on somatic        | 10/87     | 370/18866 | 7.80E-06 | 0.001575 | 0.001402 | 7099/6421 | 10    |
| BP      | GO:0045348 | positive regulation of MHC class II biosynthe    | 3/87      | 10/18866  | 1.11E-05 | 0.002019 | 0.001797 | 7099/3717 | 3     |
| BP      | GO:0070661 | leukocyte proliferation                          | 9/87      | 313/18866 | 1.40E-05 | 0.002169 | 0.001931 | 6355/7535 | 9     |
| BP      | GO:0045670 | regulation of osteoclast differentiation         | 5/87      | 67/18866  | 1.43E-05 | 0.002169 | 0.001931 | 11025/123 | 5     |
| BP      | GO:0002285 | lymphocyte activation involved in immune res     | 7/87      | 187/18866 | 2.52E-05 | 0.003518 | 0.003131 | 7099/6421 | 7     |
| BP      | GO:0030183 | B cell differentiation                           | 6/87      | 137/18866 | 4.10E-05 | 0.005018 | 0.004466 | 931/4242/ | 6     |
| BP      | GO:0045346 | regulation of MHC class II biosynthetic proces   | 3/87      | 15/18866  | 4.14E-05 | 0.005018 | 0.004466 | 7099/3717 | 3     |
| BP      | GO:0002449 | lymphocyte mediated immunity                     | 9/87      | 366/18866 | 4.78E-05 | 0.005426 | 0.004829 | 23180/382 | 9     |
| BP      | GO:0045342 | MHC class II biosynthetic process                | 3/87      | 16/18866  | 5.08E-05 | 0.005432 | 0.004834 | 7099/3717 | 3     |
| BP      | GO:1902105 | regulation of leukocyte differentiation          | 8/87      | 290/18866 | 5.78E-05 | 0.005839 | 0.005196 | 11025/123 | 8     |
| BP      | GO:0042100 | B cell proliferation                             | 5/87      | 97/18866  | 8.57E-05 | 0.008204 | 0.007301 | 7099/931/ | 5     |
| BP      | GO:0019882 | antigen processing and presentation              | 7/87      | 232/18866 | 9.85E-05 | 0.008953 | 0.007967 | 23180/311 | 7     |
| BP      | GO:0006968 | cellular defense response                        | 4/87      | 54/18866  | 0.000112 | 0.009455 | 0.008414 | 7707/2364 | 4     |
| BP      | GO:0007204 | positive regulation of cytosolic calcium ion co  | 8/87      | 322/18866 | 0.00012  | 0.009455 | 0.008414 | 8698/2359 | 8     |
| BP      | GO:0070663 | regulation of leukocyte proliferation            | 7/87      | 240/18866 | 0.000122 | 0.009455 | 0.008414 | 6355/7535 | 7     |
| BP      | GO:1902106 | negative regulation of leukocyte differentiatio  | 5/87      | 105/18866 | 0.000125 | 0.009455 | 0.008414 | 11025/289 | 5     |
| BP      | GO:0030099 | myeloid cell differentiation                     | 9/87      | 431/18866 | 0.000166 | 0.012043 | 0.010717 | 11025/123 | 9     |
| BP      | GO:0071346 | cellular response to interferon-gamma            | 6/87      | 182/18866 | 0.000196 | 0.013721 | 0.012211 | 6355/7099 | 6     |
| BP      | GO:0051480 | regulation of cytosolic calcium ion concentrat   | 8/87      | 357/18866 | 0.000242 | 0.016294 | 0.014501 | 8698/2359 | 8     |
| BP      | GO:0006874 | cellular calcium ion homeostasis                 | 9/87      | 456/18866 | 0.000252 | 0.016343 | 0.014545 | 8698/2359 | 9     |
| BP      | GO:0002761 | regulation of myeloid leukocyte differentiatio   | 5/87      | 123/18866 | 0.000262 | 0.016409 | 0.014603 | 11025/123 | 5     |
| BP      | GO:0002335 | mature B cell differentiation                    | 3/87      | 28/18866  | 0.000285 | 0.0173   | 0.015396 | 4242/5561 | 3     |
| BP      | GO:0055074 | calcium ion homeostasis                          | 9/87      | 468/18866 | 0.000305 | 0.017869 | 0.015902 | 8698/2359 | 9     |
| BP      | GO:0045671 | negative regulation of osteoclast differentiatio | 3/87      | 29/18866  | 0.000317 | 0.01803  | 0.016045 | 11025/709 | 3     |
| BP      | GO:0046651 | lymphocyte proliferation                         | 7/87      | 283/18866 | 0.000333 | 0.018356 | 0.016336 | 7535/7099 | 7     |
| BP      | GO:0034341 | response to interferon-gamma                     | 6/87      | 202/18866 | 0.000344 | 0.018381 | 0.016358 | 6355/7099 | 6     |
| BP      | GO:0032943 | mononuclear cell proliferation                   | 7/87      | 286/18866 | 0.000355 | 0.018442 | 0.016412 | 7535/7099 | 7     |
| BP      | GO:0002573 | myeloid leukocyte differentiation                | 6/87      | 210/18866 | 0.000423 | 0.021344 | 0.018995 | 11025/123 | 6     |

|    |            |                                                |       |           |          |          |          |           |    |
|----|------------|------------------------------------------------|-------|-----------|----------|----------|----------|-----------|----|
| BP | GO:0072503 | cellular divalent inorganic cation homeostasis | 9/87  | 492/18866 | 0.000439 | 0.02155  | 0.019178 | 8698/2359 | 9  |
| BP | GO:0002312 | B cell activation involved in immune response  | 4/87  | 80/18866  | 0.000511 | 0.02444  | 0.02175  | 7099/4242 | 4  |
| BP | GO:0002831 | regulation of response to biotic stimulus      | 8/87  | 409/18866 | 0.000598 | 0.027868 | 0.024801 | 10133/511 | 8  |
| BP | GO:0046777 | protein autophosphorylation                    | 6/87  | 237/18866 | 0.000798 | 0.035958 | 0.032    | 7535/9770 | 6  |
| BP | GO:1903707 | negative regulation of hemopoiesis             | 5/87  | 158/18866 | 0.000822 | 0.035958 | 0.032    | 11025/289 | 5  |
| BP | GO:0060333 | interferon-gamma-mediated signaling pathway    | 4/87  | 91/18866  | 0.000831 | 0.035958 | 0.032    | 3717/3119 | 4  |
| BP | GO:0071674 | mononuclear cell migration                     | 4/87  | 97/18866  | 0.001055 | 0.044588 | 0.03968  | 7941/1230 | 4  |
| CC | GO:0009897 | external side of plasma membrane               | 10/93 | 417/19559 | 2.91E-05 | 0.005126 | 0.004516 | 1230/1666 | 10 |
| CC | GO:0042613 | MHC class II protein complex                   | 3/93  | 16/19559  | 5.57E-05 | 0.005126 | 0.004516 | 3119/3113 | 3  |
| CC | GO:0045121 | membrane raft                                  | 8/93  | 329/19559 | 0.000173 | 0.007054 | 0.006214 | 7535/2318 | 8  |
| CC | GO:0098857 | membrane microdomain                           | 8/93  | 330/19559 | 0.000177 | 0.007054 | 0.006214 | 7535/2318 | 8  |
| CC | GO:0042611 | MHC protein complex                            | 3/93  | 25/19559  | 0.000222 | 0.007054 | 0.006214 | 3119/3113 | 3  |
| CC | GO:0098589 | membrane region                                | 8/93  | 343/19559 | 0.00023  | 0.007054 | 0.006214 | 7535/2318 | 8  |

Supplementary Table 9. KEGG analysis of genes in the yellow module

| ID       | Description                                  | GeneRatio | BgRatio  | pvalue   | p.adjust | qvalue   | geneID             | Count |
|----------|----------------------------------------------|-----------|----------|----------|----------|----------|--------------------|-------|
| hsa04640 | Hematopoietic cell lineage                   | 8/53      | 99/8108  | 2.09E-07 | 3.14E-05 | 2.58E-05 | MS4A1/HLA-DQB1/H   | 8     |
| hsa05145 | Toxoplasmosis                                | 8/53      | 112/8108 | 5.45E-07 | 4.09E-05 | 3.36E-05 | TLR4/LY96/JAK2/HLA | 8     |
| hsa04612 | Antigen processing and presentation          | 6/53      | 78/8108  | 1.05E-05 | 0.000523 | 0.000429 | KLRD1/KLRC3/HLA-D  | 6     |
| hsa04064 | NF-kappa B signaling pathway                 | 6/53      | 104/8108 | 5.43E-05 | 0.001592 | 0.001307 | ZAP70/TRAF1/TLR4/L | 6     |
| hsa05321 | Inflammatory bowel disease                   | 5/53      | 65/8108  | 6.04E-05 | 0.001592 | 0.001307 | TLR4/IL21R/HLA-DQB | 5     |
| hsa04659 | Th17 cell differentiation                    | 6/53      | 107/8108 | 6.37E-05 | 0.001592 | 0.001307 | ZAP70/JAK2/IL21R/H | 6     |
| hsa05140 | Leishmaniasis                                | 5/53      | 77/8108  | 0.000136 | 0.002842 | 0.002333 | TLR4/JAK2/HLA-DQB  | 5     |
| hsa05332 | Graft-versus-host disease                    | 4/53      | 42/8108  | 0.000152 | 0.002842 | 0.002333 | KLRD1/HLA-DQB1/H   | 4     |
| hsa04658 | Th1 and Th2 cell differentiation             | 5/53      | 92/8108  | 0.000315 | 0.004967 | 0.004078 | ZAP70/JAK2/HLA-DQ  | 5     |
| hsa05323 | Rheumatoid arthritis                         | 5/53      | 93/8108  | 0.000331 | 0.004967 | 0.004078 | TLR4/LTB/HLA-DQB1  | 5     |
| hsa05164 | Influenza A                                  | 6/53      | 172/8108 | 0.000839 | 0.011444 | 0.009396 | TLR4/JAK2/HLA-DQB  | 6     |
| hsa05310 | Asthma                                       | 3/53      | 31/8108  | 0.001042 | 0.012272 | 0.010076 | HLA-DQB1/HLA-DPA   | 3     |
| hsa05152 | Tuberculosis                                 | 6/53      | 180/8108 | 0.001064 | 0.012272 | 0.010076 | TLR4/JAK2/HLA-DQB  | 6     |
| hsa05330 | Allograft rejection                          | 3/53      | 38/8108  | 0.001893 | 0.018931 | 0.015543 | HLA-DQB1/HLA-DPA   | 3     |
| hsa05340 | Primary immunodeficiency                     | 3/53      | 38/8108  | 0.001893 | 0.018931 | 0.015543 | ZAP70/CIITA/CD19   | 3     |
| hsa04940 | Type I diabetes mellitus                     | 3/53      | 43/8108  | 0.002706 | 0.025373 | 0.020833 | HLA-DQB1/HLA-DPA   | 3     |
| hsa05150 | Staphylococcus aureus infection              | 4/53      | 96/8108  | 0.003468 | 0.030602 | 0.025126 | FPR3/HLA-DQB1/HLA  | 4     |
| hsa04672 | Intestinal immune network for IgA production | 3/53      | 49/8108  | 0.003931 | 0.032755 | 0.026894 | HLA-DQB1/HLA-DPA   | 3     |
| hsa05320 | Autoimmune thyroid disease                   | 3/53      | 53/8108  | 0.004907 | 0.038739 | 0.031806 | HLA-DQB1/HLA-DPA   | 3     |
